# Supplementary material for: The Greatwall-Endosulfine-PP2A/B55 pathway controls entry into quiescence by promoting translation of Elongator-tuneable transcripts
Source: Research Square preprint supplement (doi:10.21203/rs.3.rs-3616701/v1), 2023-12-05
Supplement: Supplementary file 1 [file 02385eb91eef5151175f87e8.xlsx]

## Sheet: 0549_proteinGroups
								0549_2: Pab1 -N2
Majority protein IDs	Protein names	Gene names	Score	id	Fasta headers	Mol. weight [kDa]	Sequence coverage [%]	Intensity 0549_2_1	Peptides 0549_2_1	iBAQ 0549_2_1
Q12702	Protein phosphatase PP2A regulatory subunit B	pab1	323.31	1422	sp|Q12702|2ABA_SCHPO Protein phosphatase PP2A regulatory subunit B OS=Schizosaccharomyces pombe (strain 972 / ATCC 24843) OX=284812 GN=pab1 PE=1 SV=2	52.795	86.4	136770000	53	5946700
P40370	Enolase 1-1	eno101	323.31	984	sp|P40370|ENO11_SCHPO Enolase 1-1 OS=Schizosaccharomyces pombe (strain 972 / ATCC 24843) OX=284812 GN=eno101 PE=1 SV=2	47.435	77	75324000	34	4184700
P36580	Fructose-bisphosphate aldolase	fba1	323.31	949	sp|P36580|ALF_SCHPO Fructose-bisphosphate aldolase OS=Schizosaccharomyces pombe (strain 972 / ATCC 24843) OX=284812 GN=fba1 PE=1 SV=2	39.57	93.6	53430000	27	3339400
P0CT55;P0CT54			323.31	873	sp|P0CT55|EF1A3_SCHPO Elongation factor 1-alpha-B/C OS=Schizosaccharomyces pombe (strain 972 / ATCC 24843) OX=284812 GN=tef103 PE=1 SV=1;sp|P0CT54|EF1A2_SCHPO Elongation factor 1-alpha-B OS=Schizosaccharomyces pombe (strain 972 / ATCC 24843) OX=284812 GN=t	49.674	83	70787000	37	2949500
P36623	Phosphoglycerate mutase	gpm1	323.31	973	sp|P36623|PMGY_SCHPO Phosphoglycerate mutase OS=Schizosaccharomyces pombe (strain 972 / ATCC 24843) OX=284812 GN=gpm1 PE=1 SV=1	23.765	88.6	24764000	27	1904900
P78958	Glyceraldehyde-3-phosphate dehydrogenase 1	tdh1	323.31	1090	sp|P78958|G3P1_SCHPO Glyceraldehyde-3-phosphate dehydrogenase 1 OS=Schizosaccharomyces pombe (strain 972 / ATCC 24843) OX=284812 GN=tdh1 PE=1 SV=1	35.869	86.9	34890000	30	1836300
P40998	Thiamine thiazole synthase	thi2	323.31	1003	sp|P40998|THI4_SCHPO Thiamine thiazole synthase OS=Schizosaccharomyces pombe (strain 972 / ATCC 24843) OX=284812 GN=thi2 PE=2 SV=2	35.274	80.2	30255000	21	1779700
P00332	Alcohol dehydrogenase	adh1	323.31	849	sp|P00332|ADH_SCHPO Alcohol dehydrogenase OS=Schizosaccharomyces pombe (strain 972 / ATCC 24843) OX=284812 GN=adh1 PE=1 SV=2	37.396	75.1	28562000	21	1586800
P23636	Major serine/threonine-protein phosphatase PP2A-2 catalytic subunit	ppa2	323.31	917	sp|P23636|PP2A2_SCHPO Major serine/threonine-protein phosphatase PP2A-2 catalytic subunit OS=Schizosaccharomyces pombe (strain 972 / ATCC 24843) OX=284812 GN=ppa2 PE=3 SV=1	36.489	81.1	26167000	22	1539200
O60198	S-adenosylmethionine synthase	sam1	323.31	497	sp|O60198|METK_SCHPO S-adenosylmethionine synthase OS=Schizosaccharomyces pombe (strain 972 / ATCC 24843) OX=284812 GN=sam1 PE=1 SV=1	41.831	87.7	33732000	29	1533300
P18253	Peptidyl-prolyl cis-trans isomerase	ppi1	323.31	902	sp|P18253|CYPH_SCHPO Peptidyl-prolyl cis-trans isomerase OS=Schizosaccharomyces pombe (strain 972 / ATCC 24843) OX=284812 GN=ppi1 PE=3 SV=1	17.402	84.6	13367000	11	1485200
O74887	Peroxiredoxin tpx1	tpx1	323.31	655	sp|O74887|TPX1_SCHPO Peroxiredoxin tpx1 OS=Schizosaccharomyces pombe (strain 972 / ATCC 24843) OX=284812 GN=tpx1 PE=1 SV=1	21.191	92.7	15542000	14	1412900
Q92345	Probable pyruvate decarboxylase C1F8.07c	SPAC1F8.07c	323.31	1445	sp|Q92345|PDC2_SCHPO Probable pyruvate decarboxylase C1F8.07c OS=Schizosaccharomyces pombe (strain 972 / ATCC 24843) OX=284812 GN=SPAC1F8.07c PE=1 SV=3	61.719	77.5	30684000	38	1227400
Q10208	Pyruvate kinase	pyk1	323.31	1341	sp|Q10208|KPYK_SCHPO Pyruvate kinase OS=Schizosaccharomyces pombe (strain 972 / ATCC 24843) OX=284812 GN=pyk1 PE=1 SV=1	55.514	85.5	26555000	38	948380
P56289	Eukaryotic translation initiation factor 5A-1	tif51a	323.31	1050	sp|P56289|IF5A1_SCHPO Eukaryotic translation initiation factor 5A-1 OS=Schizosaccharomyces pombe (strain 972 / ATCC 24843) OX=284812 GN=tif51a PE=1 SV=1	17.152	91.1	7502200	14	937780
O14388	60S ribosomal protein L27-A	rpl27a	261.4	286	sp|O14388|RL27A_SCHPO 60S ribosomal protein L27-A OS=Schizosaccharomyces pombe (strain 972 / ATCC 24843) OX=284812 GN=rpl2701 PE=2 SV=2	15.389	57.4	4959100	10	826510
O13972	Probable serine hydroxymethyltransferase, cytosolic	SPAC24C9.12c	323.31	163	sp|O13972|GLYD_SCHPO Probable serine hydroxymethyltransferase, cytosolic OS=Schizosaccharomyces pombe (strain 972 / ATCC 24843) OX=284812 GN=SPAC24C9.12c PE=3 SV=1	51.86	79.7	21527000	29	797280
O94578	Uncharacterized protein C1442.05c	SPCC1442.05c	11.105	803	sp|O94578|YQ75_SCHPO Uncharacterized protein C1442.05c OS=Schizosaccharomyces pombe (strain 972 / ATCC 24843) OX=284812 GN=SPCC1442.05c PE=4 SV=1	20.036	29.9	9535200	1	794600
O60101	Phosphoglycerate kinase	pgk1	323.31	469	sp|O60101|PGK_SCHPO Phosphoglycerate kinase OS=Schizosaccharomyces pombe (strain 972 / ATCC 24843) OX=284812 GN=pgk1 PE=1 SV=1	43.963	92	20822000	36	743650
P10989	Actin	act1	323.31	889	sp|P10989|ACT_SCHPO Actin OS=Schizosaccharomyces pombe (strain 972 / ATCC 24843) OX=284812 GN=act1 PE=1 SV=1	41.764	76.5	14751000	20	737540
P78812	6-phosphogluconate dehydrogenase, decarboxylating	SPBC660.16	323.31	1068	sp|P78812|6PGD_SCHPO 6-phosphogluconate dehydrogenase, decarboxylating OS=Schizosaccharomyces pombe (strain 972 / ATCC 24843) OX=284812 GN=SPBC660.16 PE=1 SV=2	53.679	90	19688000	36	729170
Q9UT08	Protein phosphatase PP2A regulatory subunit A	paa1	323.31	1725	sp|Q9UT08|2AAA_SCHPO Protein phosphatase PP2A regulatory subunit A OS=Schizosaccharomyces pombe (strain 972 / ATCC 24843) OX=284812 GN=paa1 PE=1 SV=1	66.616	77.1	22490000	35	702820
O59855	Probable heat shock protein ssa2	ssa2	323.31	450	sp|O59855|HSP72_SCHPO Probable heat shock protein ssa2 OS=Schizosaccharomyces pombe (strain 972 / ATCC 24843) OX=284812 GN=ssa2 PE=1 SV=3	70.232	68	23838000	50	701120
Q10284	Heat shock protein sks2	sks2	323.31	1364	sp|Q10284|SSB1_SCHPO Ribosome-associated molecular chaperone sks2 OS=Schizosaccharomyces pombe (strain 972 / ATCC 24843) OX=284812 GN=sks2 PE=1 SV=2	67.205	75.4	18114000	42	670890
P36597	4-amino-5-hydroxymethyl-2-methylpyrimidine phosphate synthase	nmt1	323.31	960	sp|P36597|NMT1_SCHPO 4-amino-5-hydroxymethyl-2-methylpyrimidine phosphate synthase OS=Schizosaccharomyces pombe (strain 972 / ATCC 24843) OX=284812 GN=nmt1 PE=2 SV=1	38.965	75.1	13397000	19	669860
Q9UT19	Probable 5-methyltetrahydropteroyltriglutamate--homocysteine methyltransferase	met26	323.31	1729	sp|Q9UT19|METE_SCHPO Probable 5-methyltetrahydropteroyltriglutamate--homocysteine methyltransferase OS=Schizosaccharomyces pombe (strain 972 / ATCC 24843) OX=284812 GN=met26 PE=1 SV=1	85.339	85.9	32972000	51	659430
P78946	60S ribosomal protein L26	rpl26	110.49	1088	sp|P78946|RL26_SCHPO 60S ribosomal protein L26 OS=Schizosaccharomyces pombe (strain 972 / ATCC 24843) OX=284812 GN=rpl26 PE=3 SV=1	14.341	51.6	3211200	8	642250
O14460	Elongation factor 2	eft201	323.31	290	sp|O14460|EF2_SCHPO Elongation factor 2 OS=Schizosaccharomyces pombe (strain 972 / ATCC 24843) OX=284812 GN=eft201 PE=1 SV=2	93.23	78.6	28746000	47	624900
Q9C0Z7	40S ribosomal protein S6-B	rps6b	220.87	1475	sp|Q9C0Z7|RS6B_SCHPO 40S ribosomal protein S6-B OS=Schizosaccharomyces pombe (strain 972 / ATCC 24843) OX=284812 GN=rps602 PE=1 SV=1	27.475	56.9	5336200	13	592910
P41887	Heat shock protein 90 homolog	swo1	323.31	1013	sp|P41887|HSP90_SCHPO Heat shock protein 90 homolog OS=Schizosaccharomyces pombe (strain 972 / ATCC 24843) OX=284812 GN=swo1 PE=1 SV=2	80.595	67.8	20931000	41	581410
O14339	60S ribosomal protein L17-A	rpl17a	188.31	273	sp|O14339|RL17A_SCHPO 60S ribosomal protein L17-A OS=Schizosaccharomyces pombe (strain 972 / ATCC 24843) OX=284812 GN=rpl1701 PE=3 SV=1	20.814	56.1	5801200	11	580120
O13639	Adenosylhomocysteinase		323.31	64	sp|O13639|SAHH_SCHPO Adenosylhomocysteinase OS=Schizosaccharomyces pombe (strain 972 / ATCC 24843) OX=284812 GN=pi047 PE=3 SV=1	47.383	62.4	11595000	24	579740
P0CT76;P0CT75			135.85	883	sp|P0CT76|RS23B_SCHPO 40S ribosomal protein S23-B OS=Schizosaccharomyces pombe (strain 972 / ATCC 24843) OX=284812 GN=rps2302 PE=1 SV=1;sp|P0CT75|RS23A_SCHPO 40S ribosomal protein S23-A OS=Schizosaccharomyces pombe (strain 972 / ATCC 24843) OX=284812 GN=rp	15.655	55.2	4373200	7	546650
P23635	Minor serine/threonine-protein phosphatase PP2A-1 catalytic subunit	ppa1	279.68	916	sp|P23635|PP2A1_SCHPO Minor serine/threonine-protein phosphatase PP2A-1 catalytic subunit OS=Schizosaccharomyces pombe (strain 972 / ATCC 24843) OX=284812 GN=ppa1 PE=3 SV=1	35.29	60.2	7031000	14	540850
P47943	ATP-dependent RNA helicase eIF4A	tif1	323.31	1020	sp|P47943|IF4A_SCHPO ATP-dependent RNA helicase eIF4A OS=Schizosaccharomyces pombe (strain 972 / ATCC 24843) OX=284812 GN=tif1 PE=1 SV=2	44.436	86.2	11286000	26	513010
P07669	Triosephosphate isomerase	tpi1	323.31	862	sp|P07669|TPIS_SCHPO Triosephosphate isomerase OS=Schizosaccharomyces pombe (strain 972 / ATCC 24843) OX=284812 GN=tpi1 PE=1 SV=4	27.227	91.2	8106800	14	506680
O13839	G2-specific protein kinase fin1	fin1	2.6006	120	sp|O13839|FIN1_SCHPO G2-specific protein kinase fin1 OS=Schizosaccharomyces pombe (strain 972 / ATCC 24843) OX=284812 GN=fin1 PE=3 SV=1	82.688	2.2	19524000	1	476190
P40372	60S ribosomal protein L3-A	rpl3a	323.31	986	sp|P40372|RL3A_SCHPO 60S ribosomal protein L3-A OS=Schizosaccharomyces pombe (strain 972 / ATCC 24843) OX=284812 GN=rpl301 PE=1 SV=2	43.802	65.7	9508300	26	452780
O94489	Elongation factor 3	tef3	323.31	777	sp|O94489|EF3_SCHPO Elongation factor 3 OS=Schizosaccharomyces pombe (strain 972 / ATCC 24843) OX=284812 GN=tef3 PE=1 SV=1	115.8	72.6	22814000	52	447320
O13672	60S ribosomal protein L8	rpl8	212.68	70	sp|O13672|RL8_SCHPO 60S ribosomal protein L8 OS=Schizosaccharomyces pombe (strain 972 / ATCC 24843) OX=284812 GN=rpl8 PE=1 SV=3	28.606	65.6	7603200	12	447240
P78827	Probable ketol-acid reductoisomerase, mitochondrial	ilv5	323.31	1074	sp|P78827|ILV5_SCHPO Probable ketol-acid reductoisomerase, mitochondrial OS=Schizosaccharomyces pombe (strain 972 / ATCC 24843) OX=284812 GN=ilv5 PE=1 SV=2	45.188	74.5	9284500	27	442120
O74892	40S ribosomal protein S2	rps2	323.31	657	sp|O74892|RS2_SCHPO 40S ribosomal protein S2 OS=Schizosaccharomyces pombe (strain 972 / ATCC 24843) OX=284812 GN=rps2 PE=1 SV=1	27.637	41.9	7007100	11	437940
O94515	T-complex protein 1 subunit zeta	cct6	323.31	786	sp|O94515|TCPZ_SCHPO T-complex protein 1 subunit zeta OS=Schizosaccharomyces pombe (strain 972 / ATCC 24843) OX=284812 GN=cct6 PE=3 SV=1	58.548	60.2	11767000	20	420250
O74330	40S ribosomal protein S27	rps27	67.88	512	sp|O74330|RS27_SCHPO 40S ribosomal protein S27 OS=Schizosaccharomyces pombe (strain 972 / ATCC 24843) OX=284812 GN=rps27 PE=3 SV=1	9.1718	38.6	1620800	2	405190
Q9P769	60S ribosomal protein L10-B	rpl10b	291.45	1558	sp|Q9P769|RL10B_SCHPO 60S ribosomal protein L10-B OS=Schizosaccharomyces pombe (strain 972 / ATCC 24843) OX=284812 GN=rpl1002 PE=3 SV=1	25.359	54.3	3622100	11	402460
Q9UTM4	T-complex protein 1 subunit epsilon	cct5	323.31	1789	sp|Q9UTM4|TCPE_SCHPO T-complex protein 1 subunit epsilon OS=Schizosaccharomyces pombe (strain 972 / ATCC 24843) OX=284812 GN=cct5 PE=3 SV=1	59.377	63.7	11849000	29	394960
A0A059PIR9			152.03	0	tr|A0A059PIR9|A0A059PIR9_AEQVI Yellow fluorescent protein (Fragment) OS=Aequorea victoria OX=6100 GN=yfp PE=1 SV=1	28.13	33.1	3917800	6	391780
Q10147	Probable T-complex protein 1 subunit beta	cct2	323.31	1313	sp|Q10147|TCPB_SCHPO Probable T-complex protein 1 subunit beta OS=Schizosaccharomyces pombe (strain 972 / ATCC 24843) OX=284812 GN=cct2 PE=3 SV=1	56.676	72.3	11222000	27	374060
O42914	Uncharacterized protein C16A3.08c	SPBC16A3.08c	231.58	338	sp|O42914|YBI8_SCHPO Uncharacterized protein C16A3.08c OS=Schizosaccharomyces pombe (strain 972 / ATCC 24843) OX=284812 GN=SPBC16A3.08c PE=1 SV=1	30.949	46.5	4079000	15	370810
O74172;P79009	40S ribosomal protein S25-B;40S ribosomal protein S25-A	rps25b;rps25a	41.03	499	sp|O74172|RS25B_SCHPO 40S ribosomal protein S25-B OS=Schizosaccharomyces pombe (strain 972 / ATCC 24843) OX=284812 GN=rps2501 PE=3 SV=1;sp|P79009|RS25A_SCHPO 40S ribosomal protein S25-A OS=Schizosaccharomyces pombe (strain 972 / ATCC 24843) OX=284812 GN=rp	9.8194	36.4	1104600	4	368200
P78753	Probable asparagine synthetase [glutamine-hydrolyzing]	asn1	323.31	1054	sp|P78753|ASNS_SCHPO Probable asparagine synthetase [glutamine-hydrolyzing] OS=Schizosaccharomyces pombe (strain 972 / ATCC 24843) OX=284812 GN=asn1 PE=1 SV=3	63.24	80.3	12054000	32	365280
P0CT74;P0CT73			158.79	882	sp|P0CT74|RS11B_SCHPO 40S ribosomal protein S11-B OS=Schizosaccharomyces pombe (strain 972 / ATCC 24843) OX=284812 GN=rps1102 PE=3 SV=1;sp|P0CT73|RS11A_SCHPO 40S ribosomal protein S11-A OS=Schizosaccharomyces pombe (strain 972 / ATCC 24843) OX=284812 GN=rp	17.5	53.9	3217800	8	357530
O60143	60S ribosomal protein L7-C	rpl7c	323.31	482	sp|O60143|RL7C_SCHPO 60S ribosomal protein L7-C OS=Schizosaccharomyces pombe (strain 972 / ATCC 24843) OX=284812 GN=rpl701 PE=1 SV=1	28.73	67.7	4949900	21	353570
Q9P784	60S ribosomal protein L4-B	rpl4b	323.31	1565	sp|Q9P784|RL4B_SCHPO 60S ribosomal protein L4-B OS=Schizosaccharomyces pombe (strain 972 / ATCC 24843) OX=284812 GN=rpl401 PE=3 SV=1	39.91	57.3	5910800	18	347700
Q09179	Glutamine synthetase	gln1	323.31	1175	sp|Q09179|GLNA_SCHPO Glutamine synthetase OS=Schizosaccharomyces pombe (strain 972 / ATCC 24843) OX=284812 GN=gln1 PE=1 SV=2	40.018	64.9	6422200	15	338010
O14100	Protein zds1	zds1	323.31	205	sp|O14100|ZDS1_SCHPO Protein zds1 OS=Schizosaccharomyces pombe (strain 972 / ATCC 24843) OX=284812 GN=zds1 PE=1 SV=2	103.1	64.5	15798000	50	336130
O14463	Thioredoxin-1	trx1	323.31	291	sp|O14463|TRX1_SCHPO Thioredoxin-1 OS=Schizosaccharomyces pombe (strain 972 / ATCC 24843) OX=284812 GN=trx1 PE=3 SV=3	11.297	91.3	1954100	8	325690
P05764	40S ribosomal protein S21	rps21	138.23	858	sp|P05764|RS21_SCHPO 40S ribosomal protein S21 OS=Schizosaccharomyces pombe (strain 972 / ATCC 24843) OX=284812 GN=rps21 PE=1 SV=2	9.6166	69	1625900	4	325190
P79058	mRNA stability protein mug134	mug134	89.871	1097	sp|P79058|IGO1_SCHPO mRNA stability protein mug134 OS=Schizosaccharomyces pombe (strain 972 / ATCC 24843) OX=284812 GN=mug134 PE=2 SV=4	15.441	60.4	2878500	6	319830
O14293	Putative aldehyde dehydrogenase-like protein C9E9.09c	SPAC9E9.09c	323.31	257	sp|O14293|YF19_SCHPO Putative aldehyde dehydrogenase-like protein C9E9.09c OS=Schizosaccharomyces pombe (strain 972 / ATCC 24843) OX=284812 GN=SPAC9E9.09c PE=1 SV=1	54.768	77.9	8633300	21	319750
Q10281	Guanine nucleotide-binding protein subunit beta-like protein	rkp1	323.31	1362	sp|Q10281|GBLP_SCHPO Guanine nucleotide-binding protein subunit beta-like protein OS=Schizosaccharomyces pombe (strain 972 / ATCC 24843) OX=284812 GN=rkp1 PE=1 SV=3	34.851	93	5749200	20	319400
P09627	Plasma membrane ATPase 1	pma1	323.31	868	sp|P09627|PMA1_SCHPO Plasma membrane ATPase 1 OS=Schizosaccharomyces pombe (strain 972 / ATCC 24843) OX=284812 GN=pma1 PE=1 SV=1	99.883	46.2	10191000	32	318480
P0CT59;P0CT58			158.45	875	sp|P0CT59|RS22B_SCHPO 40S ribosomal protein S22-B OS=Schizosaccharomyces pombe (strain 972 / ATCC 24843) OX=284812 GN=rps2202 PE=3 SV=1;sp|P0CT58|RS22A_SCHPO 40S ribosomal protein S22-A OS=Schizosaccharomyces pombe (strain 972 / ATCC 24843) OX=284812 GN=rp	14.76	67.7	2477300	10	309660
Q9UQW6	Acetyl-CoA acetyltransferase	erg10	323.31	1631	sp|Q9UQW6|THIL_SCHPO Acetyl-CoA acetyltransferase OS=Schizosaccharomyces pombe (strain 972 / ATCC 24843) OX=284812 GN=erg10 PE=2 SV=1	40.997	67.6	6349800	19	302370
O74341	T-complex protein 1 subunit gamma	cct3	323.31	514	sp|O74341|TCPG_SCHPO T-complex protein 1 subunit gamma OS=Schizosaccharomyces pombe (strain 972 / ATCC 24843) OX=284812 GN=cct3 PE=1 SV=1	58.48	74.6	10170000	35	299110
Q9URM2	Probable transketolase	SPBC2G5.05	323.31	1636	sp|Q9URM2|TKT_SCHPO Probable transketolase OS=Schizosaccharomyces pombe (strain 972 / ATCC 24843) OX=284812 GN=SPBC2G5.05 PE=2 SV=1	75.181	69.5	10335000	28	295290
Q9P7G9	Adenylyl-sulfate kinase	met14	203.1	1585	sp|Q9P7G9|KAPS_SCHPO Adenylyl-sulfate kinase OS=Schizosaccharomyces pombe (strain 972 / ATCC 24843) OX=284812 GN=met14 PE=3 SV=1	22.669	66.3	2324900	11	290610
O14069	Probable 60S ribosomal protein L28e	rpl28e	105.2	193	sp|O14069|RL28E_SCHPO Probable 60S ribosomal protein L28e OS=Schizosaccharomyces pombe (strain 972 / ATCC 24843) OX=284812 GN=rpl44 PE=1 SV=1	14.755	51.5	2278000	6	284750
O59711	Saccharopine dehydrogenase [NADP(+), L-glutamate-forming]	lys9	323.31	413	sp|O59711|LYS9_SCHPO Saccharopine dehydrogenase [NADP(+), L-glutamate-forming] OS=Schizosaccharomyces pombe (strain 972 / ATCC 24843) OX=284812 GN=lys9 PE=3 SV=1	49.938	74.2	6760200	16	281680
P17476;P17477	60S acidic ribosomal protein P1-alpha 1;60S acidic ribosomal protein P1-alpha 3	rpa1;rpa3	74.82	896	sp|P17476|RLA1_SCHPO 60S acidic ribosomal protein P1-alpha 1 OS=Schizosaccharomyces pombe (strain 972 / ATCC 24843) OX=284812 GN=rpp101 PE=3 SV=1;sp|P17477|RLA3_SCHPO 60S acidic ribosomal protein P1-alpha 3 OS=Schizosaccharomyces pombe (strain 972 / ATCC 2	11.141	22	834660	1	278220
P05734	60S ribosomal protein L19-A	rpl19a	223.92	856	sp|P05734|RL19A_SCHPO 60S ribosomal protein L19-A OS=Schizosaccharomyces pombe (strain 972 / ATCC 24843) OX=284812 GN=rpl1901 PE=1 SV=3	22.723	46.6	2220000	14	277500
O94438	40S ribosomal protein S1-B	rps102	240.59	765	sp|O94438|RS3A2_SCHPO 40S ribosomal protein S1-B OS=Schizosaccharomyces pombe (strain 972 / ATCC 24843) OX=284812 GN=rps102 PE=1 SV=3	28.521	51.6	4426200	13	276640
P0CT84;P0CT83			147.86	886	sp|P0CT84|RL12B_SCHPO 60S ribosomal protein L12-B OS=Schizosaccharomyces pombe (strain 972 / ATCC 24843) OX=284812 GN=rpl1202 PE=3 SV=1;sp|P0CT83|RL12A_SCHPO 60S ribosomal protein L12-A OS=Schizosaccharomyces pombe (strain 972 / ATCC 24843) OX=284812 GN=rp	17.666	48.5	2764000	8	276400
P21696	Glycerol-3-phosphate dehydrogenase [NAD(+)] 1	gpd1	323.31	909	sp|P21696|GPD1_SCHPO Glycerol-3-phosphate dehydrogenase [NAD(+)] 1 OS=Schizosaccharomyces pombe (strain 972 / ATCC 24843) OX=284812 GN=gpd1 PE=1 SV=2	41.995	81.8	7089000	24	272650
O74928	Bifunctional purine biosynthesis protein ade10;Phosphoribosylaminoimidazolecarboxamide formyltransferase;IMP cyclohydrolase	ade10	323.31	669	sp|O74928|PUR9_SCHPO Bifunctional purine biosynthesis protein ade10 OS=Schizosaccharomyces pombe (strain 972 / ATCC 24843) OX=284812 GN=ade10 PE=2 SV=1	64.123	83.6	9446400	33	269900
O74409	Uricase	SPCC1223.09	238.54	534	sp|O74409|URIC_SCHPO Uricase OS=Schizosaccharomyces pombe (strain 972 / ATCC 24843) OX=284812 GN=SPCC1223.09 PE=1 SV=1	33.61	51.4	4043400	11	269560
P0CT80;P0CT79			18.83	885	sp|P0CT80|RS28B_SCHPO 40S ribosomal protein S28-B OS=Schizosaccharomyces pombe (strain 972 / ATCC 24843) OX=284812 GN=rps2802 PE=3 SV=1;sp|P0CT79|RS28A_SCHPO 40S ribosomal protein S28-A OS=Schizosaccharomyces pombe (strain 972 / ATCC 24843) OX=284812 GN=rp	7.6638	50	788370	3	262790
O14313	Putative peroxiredoxin pmp20	pmp20	323.31	263	sp|O14313|PMP20_SCHPO Peroxisomal membrane associated protein 20 OS=Schizosaccharomyces pombe (strain 972 / ATCC 24843) OX=284812 GN=pmp20 PE=1 SV=2	16.675	91	2359700	7	262190
P50519	Heat shock protein hsp9	hsp9	267.88	1030	sp|P50519|HSP9_SCHPO Heat shock protein hsp9 OS=Schizosaccharomyces pombe (strain 972 / ATCC 24843) OX=284812 GN=hsp9 PE=2 SV=1	7.5031	63.2	1302700	3	260550
O74175	60S ribosomal protein L13	rpl13	159.71	502	sp|O74175|RL13_SCHPO 60S ribosomal protein L13 OS=Schizosaccharomyces pombe (strain 972 / ATCC 24843) OX=284812 GN=rpl13 PE=1 SV=1	23.529	61.5	2583300	11	258330
P42656	DNA damage checkpoint protein rad24	rad24	323.31	1017	sp|P42656|RAD24_SCHPO Checkpoint signal transducer rad24 OS=Schizosaccharomyces pombe (strain 972 / ATCC 24843) OX=284812 GN=rad24 PE=1 SV=2	30.082	68.1	3714700	17	247650
O74893	40S ribosomal protein S20	rps20	28.445	658	sp|O74893|RS20_SCHPO 40S ribosomal protein S20 OS=Schizosaccharomyces pombe (strain 972 / ATCC 24843) OX=284812 GN=rps20 PE=1 SV=1	13.544	33.1	1476000	4	246000
P40921	Elongation factor 1-gamma	tef3	323.31	1001	sp|P40921|EF1G_SCHPO Elongation factor 1-gamma OS=Schizosaccharomyces pombe (strain 972 / ATCC 24843) OX=284812 GN=tef3 PE=1 SV=1	45.786	64.8	5386100	15	244820
P0CT67;P0CT66			95.291	879	sp|P0CT67|RS18B_SCHPO 40S ribosomal protein S18-B OS=Schizosaccharomyces pombe (strain 972 / ATCC 24843) OX=284812 GN=rps1802 PE=3 SV=1;sp|P0CT66|RS18A_SCHPO 40S ribosomal protein S18-A OS=Schizosaccharomyces pombe (strain 972 / ATCC 24843) OX=284812 GN=rp	17.435	59.2	2197000	7	244110
Q9UTA6	Uncharacterized hydrolase C25B8.12c	SPAC25B8.12c	308.4	1754	sp|Q9UTA6|YL8C_SCHPO Uncharacterized hydrolase C25B8.12c OS=Schizosaccharomyces pombe (strain 972 / ATCC 24843) OX=284812 GN=SPAC25B8.12c PE=1 SV=1	33.85	68	3843600	11	240230
P0C016;P0C8R3;P0CG72	Ubiquitin-40S ribosomal protein S27a;Ubiquitin;40S ribosomal protein S27a;Ubiquitin-40S ribosomal protein S27b;Ubiquitin;40S ribosomal protein S27b;Polyubiquitin;Ubiquitin	ubi3;ubi5;ubi4	120.88	869	sp|P0C016|RS27A_SCHPO Ubiquitin-40S ribosomal protein S27a OS=Schizosaccharomyces pombe (strain 972 / ATCC 24843) OX=284812 GN=ubi3 PE=1 SV=2;sp|P0C8R3|RS27B_SCHPO Ubiquitin-40S ribosomal protein S27b OS=Schizosaccharomyces pombe (strain 972 / ATCC 24843)	17.258	47.3	1671300	8	238760
O94413	Ribose-phosphate pyrophosphokinase 2	SPCC1620.06c	181.24	757	sp|O94413|KPR2_SCHPO Ribose-phosphate pyrophosphokinase 2 OS=Schizosaccharomyces pombe (strain 972 / ATCC 24843) OX=284812 GN=SPCC1620.06c PE=1 SV=1	34.779	48.6	3972300	12	233660
O74836	60S ribosomal protein L1-B	rpl1b	104.01	631	sp|O74836|RL1B_SCHPO 60S ribosomal protein L1-B OS=Schizosaccharomyces pombe (strain 972 / ATCC 24843) OX=284812 GN=rpl101 PE=1 SV=1	23.917	49.1	2069500	8	229940
O94238	60S ribosomal protein L14	rpl14	95.519	693	sp|O94238|RL14_SCHPO 60S ribosomal protein L14 OS=Schizosaccharomyces pombe (strain 972 / ATCC 24843) OX=284812 GN=rpl14 PE=2 SV=1	15.21	55.2	1607300	6	229610
P78937	Sulfate adenylyltransferase	sua1	323.31	1087	sp|P78937|MET3_SCHPO Sulfate adenylyltransferase OS=Schizosaccharomyces pombe (strain 972 / ATCC 24843) OX=284812 GN=sua1 PE=1 SV=2	54.754	55.5	6571700	22	226610
O14027	Probable pyridoxal 5-phosphate synthase subunit PDX1	snz1	323.31	177	sp|O14027|PDX1_SCHPO Probable pyridoxal 5-phosphate synthase subunit PDX1 OS=Schizosaccharomyces pombe (strain 972 / ATCC 24843) OX=284812 GN=snz1 PE=1 SV=1	31.403	72	3836900	16	225700
P19117	Inorganic pyrophosphatase	ppa1	167.45	905	sp|P19117|IPYR_SCHPO Inorganic pyrophosphatase OS=Schizosaccharomyces pombe (strain 972 / ATCC 24843) OX=284812 GN=ppa1 PE=3 SV=2	32.467	81.3	3809200	13	224070
Q92365;O94658	60S ribosomal protein L36-A;60S ribosomal protein L36-B	rpl36a;rpl36b	110.91	827	sp|Q92365|RL36A_SCHPO 60S ribosomal protein L36-A OS=Schizosaccharomyces pombe (strain 972 / ATCC 24843) OX=284812 GN=rpl3601 PE=3 SV=2;sp|O94658|RL36B_SCHPO 60S ribosomal protein L36-B OS=Schizosaccharomyces pombe (strain 972 / ATCC 24843) OX=284812 GN=rp	11.263	47.5	651240	4	217080
O74173	Elongation factor 1-beta	tef5	153.43	500	sp|O74173|EF1B_SCHPO Elongation factor 1-beta OS=Schizosaccharomyces pombe (strain 972 / ATCC 24843) OX=284812 GN=tef5 PE=2 SV=1	23.484	48.1	2378300	8	216210
P87153	Probable T-complex protein 1 subunit eta	cct7	323.31	1129	sp|P87153|TCPH_SCHPO Probable T-complex protein 1 subunit eta OS=Schizosaccharomyces pombe (strain 972 / ATCC 24843) OX=284812 GN=cct7 PE=1 SV=1	60.686	78.9	7973300	31	215500
O74752	Mitochondrial protein import protein mas5	mas5	297.67	603	sp|O74752|MAS5_SCHPO Mitochondrial protein import protein mas5 OS=Schizosaccharomyces pombe (strain 972 / ATCC 24843) OX=284812 GN=mas5 PE=3 SV=1	44.821	60	3643000	17	214300
O74329	40S ribosomal protein S29	rps29	11.161	511	sp|O74329|RS29_SCHPO 40S ribosomal protein S29 OS=Schizosaccharomyces pombe (strain 972 / ATCC 24843) OX=284812 GN=rps29 PE=3 SV=3	6.6575	44.6	849390	2	212350
P78921	Probable T-complex protein 1 subunit theta	cct8	323.31	1085	sp|P78921|TCPQ_SCHPO Probable T-complex protein 1 subunit theta OS=Schizosaccharomyces pombe (strain 972 / ATCC 24843) OX=284812 GN=cct8 PE=2 SV=3	59.955	70.7	7819500	28	211340
P79071	60S ribosomal protein L6	rpl6	187.91	1100	sp|P79071|RL6_SCHPO 60S ribosomal protein L6 OS=Schizosaccharomyces pombe (strain 972 / ATCC 24843) OX=284812 GN=rpl6 PE=1 SV=2	21.248	44.6	1890600	8	210060
P52822;O74306	60S ribosomal protein L5-A;60S ribosomal protein L5-B	rpl5a;rpl5b	252.43	506	sp|P52822|RL5A_SCHPO 60S ribosomal protein L5-A OS=Schizosaccharomyces pombe (strain 972 / ATCC 24843) OX=284812 GN=rpl501 PE=1 SV=2;sp|O74306|RL5B_SCHPO 60S ribosomal protein L5-B OS=Schizosaccharomyces pombe (strain 972 / ATCC 24843) OX=284812 GN=rpl502	33.459	59.5	2304600	11	209510
O14112	40S ribosomal protein S10-A	rps10a	139.97	210	sp|O14112|RS10A_SCHPO 40S ribosomal protein S10-A OS=Schizosaccharomyces pombe (strain 972 / ATCC 24843) OX=284812 GN=rps1001 PE=3 SV=1	16.275	66.7	1460300	7	208620
P41891	Protein gar2	gar2	323.31	1015	sp|P41891|GAR2_SCHPO Protein gar2 OS=Schizosaccharomyces pombe (strain 972 / ATCC 24843) OX=284812 GN=gar2 PE=1 SV=2	52.987	35	3331200	11	208200
O94354	Argininosuccinate synthase	arg12	323.31	738	sp|O94354|ASSY_SCHPO Argininosuccinate synthase OS=Schizosaccharomyces pombe (strain 972 / ATCC 24843) OX=284812 GN=arg12 PE=3 SV=1	46.084	62.4	4315900	17	205520
O42938	ATP-dependent 6-phosphofructokinase	pfk1	323.31	351	sp|O42938|PFKA_SCHPO ATP-dependent 6-phosphofructokinase OS=Schizosaccharomyces pombe (strain 972 / ATCC 24843) OX=284812 GN=pfk1 PE=1 SV=1	102.55	75.4	9377000	45	203850
Q8TFH1	60S ribosomal protein L18-B	rpl18b	49.056	1437	sp|Q8TFH1|RL18B_SCHPO 60S ribosomal protein L18-B OS=Schizosaccharomyces pombe (strain 972 / ATCC 24843) OX=284812 GN=rpl1802 PE=1 SV=1	21.184	42.8	2034800	6	203480
O42848;O42991	60S ribosomal protein L16-A;60S ribosomal protein L16-B	rpl16a;rpl16b	67.647	316	sp|O42848|RL16A_SCHPO 60S ribosomal protein L16-A OS=Schizosaccharomyces pombe (strain 972 / ATCC 24843) OX=284812 GN=rpl1602 PE=1 SV=1;sp|O42991|RL16B_SCHPO 60S ribosomal protein L16-B OS=Schizosaccharomyces pombe (strain 972 / ATCC 24843) OX=284812 GN=rp	22.005	25.9	2001400	3	200140
Q09668	60S ribosomal protein L22	rpl22	48.076	1184	sp|Q09668|RL22_SCHPO 60S ribosomal protein L22 OS=Schizosaccharomyces pombe (strain 972 / ATCC 24843) OX=284812 GN=rpl22 PE=1 SV=3	13.32	51.3	997780	3	199560
O13784	40S ribosomal protein S24-A	rps24a	67.934	98	sp|O13784|RS24A_SCHPO 40S ribosomal protein S24-A OS=Schizosaccharomyces pombe (strain 972 / ATCC 24843) OX=284812 GN=rps2401 PE=3 SV=3	15.47	36.6	1192400	6	198730
O42935;P79015	60S ribosomal protein L32-B;60S ribosomal protein L32-A	rpl32b;rpl32a	41.415	349	sp|O42935|RL32B_SCHPO 60S ribosomal protein L32-B OS=Schizosaccharomyces pombe (strain 972 / ATCC 24843) OX=284812 GN=rpl3201 PE=3 SV=1;sp|P79015|RL32A_SCHPO 60S ribosomal protein L32-A OS=Schizosaccharomyces pombe (strain 972 / ATCC 24843) OX=284812 GN=rp	14.445	27.6	1760800	2	195650
Q9Y823	Homocitrate synthase, mitochondrial	lys4	323.31	1898	sp|Q9Y823|HOSM_SCHPO Homocitrate synthase, mitochondrial OS=Schizosaccharomyces pombe (strain 972 / ATCC 24843) OX=284812 GN=lys4 PE=1 SV=1	46.292	62.4	4256100	22	193460
Q10189	Mitosis-specific protein spo12	spo12	48.134	1332	sp|Q10189|SPO12_SCHPO Mitosis-specific protein spo12 OS=Schizosaccharomyces pombe (strain 972 / ATCC 24843) OX=284812 GN=spo12 PE=4 SV=1	10.13	74.4	770950	4	192740
Q9C0Y2	Putative cell agglutination protein PB2C8.01	SPAPB2C8.01	17.63	1473	sp|Q9C0Y2|YKL1_SCHPO Putative cell agglutination protein SPAPB2C8.01 OS=Schizosaccharomyces pombe (strain 972 / ATCC 24843) OX=284812 GN=SPAPB2C8.01 PE=3 SV=1	124.08	2	1526500	2	190810
P50521	Hexokinase-2	hxk2	323.31	1031	sp|P50521|HXK2_SCHPO Hexokinase-2 OS=Schizosaccharomyces pombe (strain 972 / ATCC 24843) OX=284812 GN=hxk2 PE=1 SV=1	50.92	75.4	3766800	17	188340
P54874	Hydroxymethylglutaryl-CoA synthase	hcs1	307.99	1044	sp|P54874|HMCS_SCHPO Hydroxymethylglutaryl-CoA synthase OS=Schizosaccharomyces pombe (strain 972 / ATCC 24843) OX=284812 GN=hcs1 PE=1 SV=1	49.238	59.3	4321000	18	187870
O59817	Protein efr3	efr3	4.3582	442	sp|O59817|EFR3_SCHPO Protein efr3 OS=Schizosaccharomyces pombe (strain 972 / ATCC 24843) OX=284812 GN=efr3 PE=1 SV=1	90.382	3.3	8362200	2	185830
Q09676	Probable phosphatase SPAC5H10.03	SPAC5H10.03	158.71	1189	sp|Q09676|YA03_SCHPO Probable phosphatase SPAC5H10.03 OS=Schizosaccharomyces pombe (strain 972 / ATCC 24843) OX=284812 GN=SPAC5H10.03 PE=3 SV=1	24.716	84	2178800	12	181560
O13326	O-acetylhomoserine (thiol)-lyase	SPBC428.11	323.31	57	sp|O13326|CYSD_SCHPO Homocysteine synthase OS=Schizosaccharomyces pombe (strain 972 / ATCC 24843) OX=284812 GN=met17 PE=1 SV=1	46.408	78.8	3792000	18	180570
P0CT69;P0CT68			99.46	880	sp|P0CT69|RL20B_SCHPO 60S ribosomal protein L20-B OS=Schizosaccharomyces pombe (strain 972 / ATCC 24843) OX=284812 GN=rpl2002 PE=1 SV=1;sp|P0CT68|RL20A_SCHPO 60S ribosomal protein L20-A OS=Schizosaccharomyces pombe (strain 972 / ATCC 24843) OX=284812 GN=rp	20.599	57.4	1604500	8	178280
P40375	NAD-dependent malic enzyme	mae2	323.31	989	sp|P40375|MAOX_SCHPO NAD-dependent malic enzyme OS=Schizosaccharomyces pombe (strain 972 / ATCC 24843) OX=284812 GN=mae2 PE=1 SV=1	62.534	70.1	5329700	25	177660
P05219	Tubulin beta chain	nda3	317.03	855	sp|P05219|TBB_SCHPO Tubulin beta chain OS=Schizosaccharomyces pombe (strain 972 / ATCC 24843) OX=284812 GN=nda3 PE=1 SV=2	49.471	48.7	2455100	13	175360
Q9URX6	60S ribosomal protein L31	rpl31	110.78	1647	sp|Q9URX6|RL31_SCHPO 60S ribosomal protein L31 OS=Schizosaccharomyces pombe (strain 972 / ATCC 24843) OX=284812 GN=rpl31 PE=3 SV=1	13.261	56.6	1224900	4	174990
O60128	40S ribosomal protein S3	rps3	195.23	479	sp|O60128|RS3_SCHPO 40S ribosomal protein S3 OS=Schizosaccharomyces pombe (strain 972 / ATCC 24843) OX=284812 GN=rps3 PE=1 SV=1	27.553	41	2972600	10	174860
P78804	NADP-specific glutamate dehydrogenase	gdh1	296.68	1065	sp|P78804|DHE4_SCHPO NADP-specific glutamate dehydrogenase OS=Schizosaccharomyces pombe (strain 972 / ATCC 24843) OX=284812 GN=gdh1 PE=1 SV=2	48.789	62.1	4535600	13	174450
P87158;Q9P4W9	40S ribosomal protein S4-A;40S ribosomal protein S4-C	rps4a;rps4c	140.68	1132	sp|P87158|RS4A_SCHPO 40S ribosomal protein S4-A OS=Schizosaccharomyces pombe (strain 972 / ATCC 24843) OX=284812 GN=rps401 PE=2 SV=2;sp|Q9P4W9|RS4C_SCHPO 40S ribosomal protein S4-C OS=Schizosaccharomyces pombe (strain 972 / ATCC 24843) OX=284812 GN=rps403	29.688	56.9	2612300	12	174160
P36591	Dihydrofolate reductase	dfr1	282.4	957	sp|P36591|DYR_SCHPO Dihydrofolate reductase OS=Schizosaccharomyces pombe (strain 972 / ATCC 24843) OX=284812 GN=dfr1 PE=2 SV=2	51.522	63.1	4334100	15	173360
Q10101	40S ribosomal protein S7	rps7	108.03	1302	sp|Q10101|RS7_SCHPO 40S ribosomal protein S7 OS=Schizosaccharomyces pombe (strain 972 / ATCC 24843) OX=284812 GN=rps7 PE=1 SV=2	21.947	57.4	1511700	7	167960
Q92354;O74884	60S ribosomal protein L24-A;60S ribosomal protein L24-B	rpl24a;rpl24b	34.694	653	sp|Q92354|RL24A_SCHPO 60S ribosomal protein L24-A OS=Schizosaccharomyces pombe (strain 972 / ATCC 24843) OX=284812 GN=rpl2401 PE=3 SV=1;sp|O74884|RL24B_SCHPO 60S ribosomal protein L24-B OS=Schizosaccharomyces pombe (strain 972 / ATCC 24843) OX=284812 GN=rp	16.836	32.9	1338700	5	167340
P35679	60S ribosomal protein L4-A	rpl4a	153.12	947	sp|P35679|RL4A_SCHPO 60S ribosomal protein L4-A OS=Schizosaccharomyces pombe (strain 972 / ATCC 24843) OX=284812 GN=rpl402 PE=1 SV=2	39.767	56.2	2837800	16	166930
Q9Y7I8	Zuotin	zuo1	292.23	1856	sp|Q9Y7I8|ZUO1_SCHPO Zuotin OS=Schizosaccharomyces pombe (strain 972 / ATCC 24843) OX=284812 GN=zuo1 PE=1 SV=2	50.209	47.5	3955900	15	164830
P25457	60S ribosomal protein L7-B	rpl7b	142.6	921	sp|P25457|RL7B_SCHPO 60S ribosomal protein L7-B OS=Schizosaccharomyces pombe (strain 972 / ATCC 24843) OX=284812 GN=rpl702 PE=3 SV=1	28.449	56.4	2305100	14	164650
O59838	Heat shock protein homolog pss1	pss1	323.31	449	sp|O59838|HSP7F_SCHPO Heat shock protein homolog pss1 OS=Schizosaccharomyces pombe (strain 972 / ATCC 24843) OX=284812 GN=pss1 PE=1 SV=2	80.374	52.6	6686800	29	163090
O74690	13 kDa ribonucleoprotein-associated protein	snu13	40.343	594	sp|O74690|SNU13_SCHPO 13 kDa ribonucleoprotein-associated protein OS=Schizosaccharomyces pombe (strain 972 / ATCC 24843) OX=284812 GN=snu13 PE=3 SV=1	13.535	42.4	814560	2	162910
P87147	Nascent polypeptide-associated complex subunit alpha	egd2	191.84	1126	sp|P87147|NACA_SCHPO Nascent polypeptide-associated complex subunit alpha OS=Schizosaccharomyces pombe (strain 972 / ATCC 24843) OX=284812 GN=egd2 PE=1 SV=1	18.785	67.1	1788100	9	162560
O13651	Isoleucine--tRNA ligase, cytoplasmic	irs1	323.31	66	sp|O13651|SYIC_SCHPO Isoleucine--tRNA ligase, cytoplasmic OS=Schizosaccharomyces pombe (strain 972 / ATCC 24843) OX=284812 GN=irs1 PE=3 SV=1	122.91	49.2	8085400	44	161710
P87228	Putative D-3-phosphoglycerate dehydrogenase		323.31	1139	sp|P87228|SERA_SCHPO Putative D-3-phosphoglycerate dehydrogenase OS=Schizosaccharomyces pombe (strain 972 / ATCC 24843) OX=284812 GN=SPCC364.07 PE=1 SV=1	50.882	67	4162400	22	160090
O74766	Probable delta-1-pyrroline-5-carboxylate dehydrogenase	SPBC24C6.04	323.31	608	sp|O74766|PUT2_SCHPO Probable delta-1-pyrroline-5-carboxylate dehydrogenase OS=Schizosaccharomyces pombe (strain 972 / ATCC 24843) OX=284812 GN=SPBC24C6.04 PE=1 SV=1	60.218	58	4285300	20	158710
O59865	40S ribosomal protein S24-B	rps24b	87.106	452	sp|O59865|RS24B_SCHPO 40S ribosomal protein S24-B OS=Schizosaccharomyces pombe (strain 972 / ATCC 24843) OX=284812 GN=rps2402 PE=2 SV=3	15.539	29.9	938800	5	156470
Q9P7L5	Ornithine aminotransferase car2	car2	279.56	1600	sp|Q9P7L5|OAT_SCHPO Ornithine aminotransferase car2 OS=Schizosaccharomyces pombe (strain 972 / ATCC 24843) OX=284812 GN=car2 PE=2 SV=1	48.247	68.9	3275300	18	155970
Q9UTJ2	Phosphomannomutase	pmm1	145.26	1783	sp|Q9UTJ2|PMM_SCHPO Phosphomannomutase OS=Schizosaccharomyces pombe (strain 972 / ATCC 24843) OX=284812 GN=pmm1 PE=2 SV=1	29.223	48.6	2487900	11	155500
P50999	T-complex protein 1 subunit delta	cct4	307.46	1039	sp|P50999|TCPD_SCHPO T-complex protein 1 subunit delta OS=Schizosaccharomyces pombe (strain 972 / ATCC 24843) OX=284812 GN=cct4 PE=2 SV=2	56.968	63	4503600	21	155300
O94686	60S ribosomal protein L43-B	rpl43b	63.843	838	sp|O94686|RL43B_SCHPO 60S ribosomal protein L43-B OS=Schizosaccharomyces pombe (strain 972 / ATCC 24843) OX=284812 GN=rpl4302 PE=3 SV=1	10.38	28.7	619960	2	154990
O74904	60S ribosomal protein L35	rpl35	93.296	663	sp|O74904|RL35_SCHPO 60S ribosomal protein L35 OS=Schizosaccharomyces pombe (strain 972 / ATCC 24843) OX=284812 GN=rpl35 PE=1 SV=1	14.302	32	924420	5	154070
Q92371	Nascent polypeptide-associated complex subunit beta	btf3	190.18	1453	sp|Q92371|NACB_SCHPO Nascent polypeptide-associated complex subunit beta OS=Schizosaccharomyces pombe (strain 972 / ATCC 24843) OX=284812 GN=btf3 PE=2 SV=2	16.202	68.9	1077900	5	153990
P78811	Probable UTP--glucose-1-phosphate uridylyltransferase	fuy1	323.31	1067	sp|P78811|UGPA1_SCHPO Probable UTP--glucose-1-phosphate uridylyltransferase OS=Schizosaccharomyces pombe (strain 972 / ATCC 24843) OX=284812 GN=fyu1 PE=1 SV=2	56.429	54.5	3694900	21	153950
P78917	Glucose-6-phosphate isomerase	pgi1	323.31	1083	sp|P78917|G6PI_SCHPO Glucose-6-phosphate isomerase OS=Schizosaccharomyces pombe (strain 972 / ATCC 24843) OX=284812 GN=pgi1 PE=1 SV=2	60.883	56.9	3999900	19	153840
Q9P7B2;O14049	40S ribosomal protein S8-B;40S ribosomal protein S8-A	rps8b;rps8a	120.31	186	sp|Q9P7B2|RS8B_SCHPO 40S ribosomal protein S8-B OS=Schizosaccharomyces pombe (strain 972 / ATCC 24843) OX=284812 GN=rps802 PE=1 SV=1;sp|O14049|RS8A_SCHPO 40S ribosomal protein S8-A OS=Schizosaccharomyces pombe (strain 972 / ATCC 24843) OX=284812 GN=rps801	22.564	45.5	1221300	6	152660
Q09900	60S ribosomal protein L38-2	rpl38b	39.328	1274	sp|Q09900|RL38B_SCHPO 60S ribosomal protein L38-2 OS=Schizosaccharomyces pombe (strain 972 / ATCC 24843) OX=284812 GN=rpl3802 PE=3 SV=1	8.3388	39.2	606070	4	151520
Q9UUG0	Fatty acid synthase subunit beta;3-hydroxyacyl-[acyl-carrier-protein] dehydratase;Enoyl-[acyl-carrier-protein] reductase [NADH];[Acyl-carrier-protein] acetyltransferase;[Acyl-carrier-protein] malonyltransferase;S-acyl fatty acid synthase thioesterase	fas1	323.31	1835	sp|Q9UUG0|FAS1_SCHPO Fatty acid synthase subunit beta OS=Schizosaccharomyces pombe (strain 972 / ATCC 24843) OX=284812 GN=fas1 PE=1 SV=1	230.56	51	14182000	67	147730
O14062	40S ribosomal protein S12-A	rps12a	87.055	190	sp|O14062|RS12A_SCHPO 40S ribosomal protein S12-A OS=Schizosaccharomyces pombe (strain 972 / ATCC 24843) OX=284812 GN=rps1201 PE=3 SV=1	15.616	56.6	886290	4	147710
Q09757	40S ribosomal protein S9-A	rps9a	103.53	1222	sp|Q09757|RS9A_SCHPO 40S ribosomal protein S9-A OS=Schizosaccharomyces pombe (strain 972 / ATCC 24843) OX=284812 GN=rps901 PE=1 SV=2	22.161	50.3	1621400	10	147400
P31209	Polyadenylate-binding protein, cytoplasmic and nuclear	pab1	323.31	933	sp|P31209|PABP_SCHPO Polyadenylate-binding protein, cytoplasmic and nuclear OS=Schizosaccharomyces pombe (strain 972 / ATCC 24843) OX=284812 GN=pab1 PE=1 SV=2	71.512	54.8	4236200	21	146080
Q10344	Translationally-controlled tumor protein homolog	p23fy	96.33	1387	sp|Q10344|TCTP_SCHPO Translationally-controlled tumor protein homolog OS=Schizosaccharomyces pombe (strain 972 / ATCC 24843) OX=284812 GN=p23fy PE=1 SV=1	19.048	42.9	1295800	6	143980
O13831	Tryptophan synthase	trp2	323.31	116	sp|O13831|TRP_SCHPO Tryptophan synthase OS=Schizosaccharomyces pombe (strain 972 / ATCC 24843) OX=284812 GN=trp2 PE=2 SV=1	75.436	66.1	4814100	29	141590
O94501	T-complex protein 1 subunit alpha	cct1	323.31	779	sp|O94501|TCPA_SCHPO T-complex protein 1 subunit alpha OS=Schizosaccharomyces pombe (strain 972 / ATCC 24843) OX=284812 GN=cct1 PE=3 SV=1	60.046	75.5	4383200	28	141390
Q9UT09	Phospho-2-dehydro-3-deoxyheptonate aldolase, tyrosine-inhibited	aro4	302.95	1726	sp|Q9UT09|AROG_SCHPO Phospho-2-dehydro-3-deoxyheptonate aldolase, tyrosine-inhibited OS=Schizosaccharomyces pombe (strain 972 / ATCC 24843) OX=284812 GN=aro4 PE=3 SV=1	40.638	62.6	2539900	12	141110
Q9UUE6	Lysine--tRNA ligase, cytoplasmic	krs1	323.31	1830	sp|Q9UUE6|SYKC_SCHPO Lysine--tRNA ligase, cytoplasmic OS=Schizosaccharomyces pombe (strain 972 / ATCC 24843) OX=284812 GN=krs1 PE=3 SV=1	67.493	62.3	4191100	28	139700
O14289	3-isopropylmalate dehydratase	leu2	323.31	255	sp|O14289|LEUC_SCHPO 3-isopropylmalate dehydratase OS=Schizosaccharomyces pombe (strain 972 / ATCC 24843) OX=284812 GN=leu2 PE=1 SV=1	82.782	62	4780100	36	136570
Q10494	Uncharacterized oxidoreductase C26F1.07	SPAC26F1.07	268.65	1415	sp|Q10494|YDG7_SCHPO Uncharacterized oxidoreductase C26F1.07 OS=Schizosaccharomyces pombe (strain 972 / ATCC 24843) OX=284812 GN=SPAC26F1.07 PE=3 SV=1	36.192	71.7	2382000	15	132330
O74895	60S ribosomal protein L15-A	rpl15a	120.9	660	sp|O74895|RL15A_SCHPO 60S ribosomal protein L15-A OS=Schizosaccharomyces pombe (strain 972 / ATCC 24843) OX=284812 GN=rpl15 PE=3 SV=1	23.806	40.3	1449200	7	131750
P52808	60S ribosomal protein L30-1	rpl30a	37.491	1040	sp|P52808|RL30A_SCHPO 60S ribosomal protein L30-1 OS=Schizosaccharomyces pombe (strain 972 / ATCC 24843) OX=284812 GN=rpl3001 PE=3 SV=2	11.591	55	785910	6	130980
Q9UU78	60S acidic ribosomal protein P1-alpha 5	rpa5	22.845	1808	sp|Q9UU78|RLA5_SCHPO 60S acidic ribosomal protein P1-alpha 5 OS=Schizosaccharomyces pombe (strain 972 / ATCC 24843) OX=284812 GN=rpp103 PE=1 SV=1	11.216	22	392070	1	130690
Q09674	UPF0317 protein C5H10.01	SPAC5H10.01	115.87	1188	sp|Q09674|YA01_SCHPO Putative hydro-lyase C5H10.01 OS=Schizosaccharomyces pombe (strain 972 / ATCC 24843) OX=284812 GN=SPAC5H10.01 PE=3 SV=1	33.756	61.1	1828700	9	130620
O74864	60S acidic ribosomal protein P0	rpp0	246.44	642	sp|O74864|RLA0_SCHPO 60S acidic ribosomal protein P0 OS=Schizosaccharomyces pombe (strain 972 / ATCC 24843) OX=284812 GN=rpp0 PE=3 SV=1	33.565	43.3	1153700	8	128190
P0CT57;P0CT56			55.429	874	sp|P0CT57|RS14B_SCHPO 40S ribosomal protein S14-B OS=Schizosaccharomyces pombe (strain 972 / ATCC 24843) OX=284812 GN=rps1402 PE=3 SV=1;sp|P0CT56|RS14A_SCHPO 40S ribosomal protein S14-A OS=Schizosaccharomyces pombe (strain 972 / ATCC 24843) OX=284812 GN=rp	14.699	60.4	897160	6	128170
P46595	Ubiquitin-conjugating enzyme E2 4	ubc4	63.865	1019	sp|P46595|UBC4_SCHPO Ubiquitin-conjugating enzyme E2 4 OS=Schizosaccharomyces pombe (strain 972 / ATCC 24843) OX=284812 GN=ubc4 PE=1 SV=1	16.476	43.5	509650	4	127410
Q09127	60S ribosomal protein L10-A	rpl10a	22.062	1165	sp|Q09127|RL10A_SCHPO 60S ribosomal protein L10-A OS=Schizosaccharomyces pombe (strain 972 / ATCC 24843) OX=284812 GN=rpl1001 PE=2 SV=2	25.373	54.3	1128200	11	125360
P78929	Cofilin	cof1	219.87	1086	sp|P78929|COFI_SCHPO Cofilin OS=Schizosaccharomyces pombe (strain 972 / ATCC 24843) OX=284812 GN=cof1 PE=1 SV=1	15.62	77.4	996260	8	124530
O75005	Valine--tRNA ligase	vas2	323.31	691	sp|O75005|SYV_SCHPO Valine--tRNA ligase OS=Schizosaccharomyces pombe (strain 972 / ATCC 24843) OX=284812 GN=vas2 PE=3 SV=1	111.32	53.7	6302800	33	121210
O14450	Probable prefoldin subunit 6		77.207	288	sp|O14450|PFD6_SCHPO Probable prefoldin subunit 6 OS=Schizosaccharomyces pombe (strain 972 / ATCC 24843) OX=284812 GN=SPAC3A11.13 PE=3 SV=1	12.813	57.9	843060	7	120440
P36579	ADP-ribosylation factor 1	arf1	253.79	948	sp|P36579|ARF1_SCHPO ADP-ribosylation factor 1 OS=Schizosaccharomyces pombe (strain 972 / ATCC 24843) OX=284812 GN=arf1 PE=2 SV=2	20.618	68.9	1444500	8	120380
O74793	Uncharacterized protein C26H8.11c	SPBC26H8.11c	85.433	619	sp|O74793|YOUB_SCHPO Uncharacterized protein C26H8.11c OS=Schizosaccharomyces pombe (strain 972 / ATCC 24843) OX=284812 GN=SPBC26H8.11c PE=4 SV=1	19.59	76.6	1320100	9	120010
O74484	Mannose-1-phosphate guanyltransferase	mpg1	282.09	564	sp|O74484|MPG1_SCHPO Mannose-1-phosphate guanyltransferase OS=Schizosaccharomyces pombe (strain 972 / ATCC 24843) OX=284812 GN=mpg1 PE=2 SV=1	39.718	75.8	2261100	15	119000
O14334	Probable prefoldin subunit 1	SPBC1D7.01	157.85	271	sp|O14334|PFD1_SCHPO Probable prefoldin subunit 1 OS=Schizosaccharomyces pombe (strain 972 / ATCC 24843) OX=284812 GN=SPBC1D7.01 PE=3 SV=1	12.647	49.1	1066500	5	118500
P87142	Heat shock protein 70 homolog C57A7.12	SPAC57A7.12	294.15	1124	sp|P87142|YDMC_SCHPO Heat shock protein 70 homolog C57A7.12 OS=Schizosaccharomyces pombe (strain 972 / ATCC 24843) OX=284812 GN=SPAC57A7.12 PE=1 SV=3	61.285	50.4	2834200	14	118090
Q9P7M5	H/ACA ribonucleoprotein complex subunit 3	nop10	8.7486	1601	sp|Q9P7M5|NOP10_SCHPO H/ACA ribonucleoprotein complex subunit nop10 OS=Schizosaccharomyces pombe (strain 972 / ATCC 24843) OX=284812 GN=nop10 PE=3 SV=1	7.6578	54.7	232500	2	116250
Q9Y7Z3	Putative acyl-CoA-binding protein	SPBC1539.06	54.141	1892	sp|Q9Y7Z3|ACBP_SCHPO Putative acyl-CoA-binding protein OS=Schizosaccharomyces pombe (strain 972 / ATCC 24843) OX=284812 GN=SPBC1539.06 PE=3 SV=1	9.838	92	690720	5	115120
Q10289	Fatty acid synthase subunit alpha;Acyl carrier;3-oxoacyl-[acyl-carrier-protein] reductase;3-oxoacyl-[acyl-carrier-protein] synthase	fas2	323.31	1366	sp|Q10289|FAS2_SCHPO Fatty acid synthase subunit alpha OS=Schizosaccharomyces pombe (strain 972 / ATCC 24843) OX=284812 GN=fas2 PE=1 SV=2	202.17	65.5	11388000	76	113880
O42700	Transaldolase	tal1	236.34	310	sp|O42700|TAL1_SCHPO Transaldolase OS=Schizosaccharomyces pombe (strain 972 / ATCC 24843) OX=284812 GN=tal1 PE=1 SV=2	35.238	54.7	2004500	9	111360
P42657	DNA damage checkpoint protein rad25	rad25	261.18	1018	sp|P42657|RAD25_SCHPO Checkpoint signal transducer rad25 OS=Schizosaccharomyces pombe (strain 972 / ATCC 24843) OX=284812 GN=rad25 PE=1 SV=1	30.369	60.4	1886600	14	110980
P32390	Actin-related protein 3	act2	151.35	939	sp|P32390|ARP3_SCHPO Actin-related protein 3 OS=Schizosaccharomyces pombe (strain 972 / ATCC 24843) OX=284812 GN=act2 PE=1 SV=1	47.373	50.1	2436800	14	110760
P78780	Probable aspartate-semialdehyde dehydrogenase	SPCC1827.06c	159.84	1060	sp|P78780|DHAS_SCHPO Probable aspartate-semialdehyde dehydrogenase OS=Schizosaccharomyces pombe (strain 972 / ATCC 24843) OX=284812 GN=SPCC1827.06c PE=1 SV=2	38.55	46.2	2086000	12	109790
Q02088	Tropomyosin	cdc8	141.26	1157	sp|Q02088|TPM_SCHPO Tropomyosin OS=Schizosaccharomyces pombe (strain 972 / ATCC 24843) OX=284812 GN=cdc8 PE=3 SV=1	18.964	57.1	1094400	6	109440
P30821	P25 protein	obr1	323.31	932	sp|P30821|P25_SCHPO P25 protein OS=Schizosaccharomyces pombe (strain 972 / ATCC 24843) OX=284812 GN=obr1 PE=1 SV=1	21.898	89.6	862940	7	107870
P0CT78;P0CT77			84.683	884	sp|P0CT78|RL11B_SCHPO 60S ribosomal protein L11-B OS=Schizosaccharomyces pombe (strain 972 / ATCC 24843) OX=284812 GN=rpl1102 PE=2 SV=1;sp|P0CT77|RL11A_SCHPO 60S ribosomal protein L11-A OS=Schizosaccharomyces pombe (strain 972 / ATCC 24843) OX=284812 GN=rp	19.891	52.3	854280	6	106790
P18869	3-isopropylmalate dehydrogenase	leu1	213.33	904	sp|P18869|LEU3_SCHPO 3-isopropylmalate dehydrogenase OS=Schizosaccharomyces pombe (strain 972 / ATCC 24843) OX=284812 GN=leu1 PE=1 SV=1	39.732	56.3	2224800	11	105940
P36602	Ribonucleoside-diphosphate reductase large chain	cdc22	323.31	963	sp|P36602|RIR1_SCHPO Ribonucleoside-diphosphate reductase large chain OS=Schizosaccharomyces pombe (strain 972 / ATCC 24843) OX=284812 GN=cdc22 PE=1 SV=2	91.998	49	4449300	20	105940
Q9HFE4	Thiol-specific monooxygenase	fmo1	183.65	1498	sp|Q9HFE4|FMO1_SCHPO Thiol-specific monooxygenase OS=Schizosaccharomyces pombe (strain 972 / ATCC 24843) OX=284812 GN=fmo1 PE=1 SV=1	49.889	47.9	2626700	14	105070
Q9UTD4	Probable prefoldin subunit 4	SPAC227.05	89.057	1762	sp|Q9UTD4|PFD4_SCHPO Probable prefoldin subunit 4 OS=Schizosaccharomyces pombe (strain 972 / ATCC 24843) OX=284812 GN=SPAC227.05 PE=3 SV=1	14.189	45.5	732550	5	104650
O74876	Meiotically up-regulated gene 135 protein	mug135	1.4637	648	sp|O74876|MU135_SCHPO Meiotically up-regulated gene 135 protein OS=Schizosaccharomyces pombe (strain 972 / ATCC 24843) OX=284812 GN=mug135 PE=1 SV=1	43.098	2.8	1666100	1	104130
O14192	Aromatic amino acid aminotransferase C56E4.03	SPAC56E4.03	323.31	228	sp|O14192|AATR1_SCHPO Aromatic amino acid aminotransferase C56E4.03 OS=Schizosaccharomyces pombe (strain 972 / ATCC 24843) OX=284812 GN=SPAC56E4.03 PE=3 SV=1	53.166	54.9	2182600	14	103930
P0CT65;P0CT64			56.416	878	sp|P0CT65|RS16B_SCHPO 40S ribosomal protein S16-B OS=Schizosaccharomyces pombe (strain 972 / ATCC 24843) OX=284812 GN=rps1602 PE=3 SV=1;sp|P0CT64|RS16A_SCHPO 40S ribosomal protein S16-A OS=Schizosaccharomyces pombe (strain 972 / ATCC 24843) OX=284812 GN=rp	15.395	44.3	1117800	4	101610
O60063	Putative 37S ribosomal protein S4-like	SPBC13G1.01c	8.9419	458	sp|O60063|NAM9_SCHPO 37S ribosomal protein S4-like, mitochondrial OS=Schizosaccharomyces pombe (strain 972 / ATCC 24843) OX=284812 GN=nam9 PE=2 SV=1	37.665	9.2	1724700	1	101450
O13614	40S ribosomal protein S10-B	rps10b	61.629	59	sp|O13614|RS10B_SCHPO 40S ribosomal protein S10-B OS=Schizosaccharomyces pombe (strain 972 / ATCC 24843) OX=284812 GN=rps1002 PE=3 SV=1	16.443	48.3	705920	6	100850
O94517	Probable proteasome subunit alpha type-1	SPBC646.16	87.668	787	sp|O94517|PSA1_SCHPO Probable proteasome subunit alpha type-1 OS=Schizosaccharomyces pombe (strain 972 / ATCC 24843) OX=284812 GN=SPBC646.16 PE=3 SV=1	26.539	52	1710300	7	100610
O74983	Ubiquitin-conjugating enzyme spm2	spm2	62.868	687	sp|O74983|MMS2_SCHPO Ubiquitin-conjugating enzyme spm2 OS=Schizosaccharomyces pombe (strain 972 / ATCC 24843) OX=284812 GN=spm2 PE=1 SV=1	15.554	57.6	590240	4	98374
P78773	Probable acetyl-coenzyme A synthetase		323.31	1058	sp|P78773|ACSA_SCHPO Probable acetyl-coenzyme A synthetase OS=Schizosaccharomyces pombe (strain 972 / ATCC 24843) OX=284812 GN=SPCC191.02c PE=1 SV=2	73.035	56.8	3615300	24	97710
O13792	ATP-dependent RNA helicase uap56	uap56	222.68	102	sp|O13792|SUB2_SCHPO ATP-dependent RNA helicase uap56 OS=Schizosaccharomyces pombe (strain 972 / ATCC 24843) OX=284812 GN=uap56 PE=1 SV=3	49.231	62.7	1750500	14	97252
P33075	Adenylate kinase	adk1	163.85	942	sp|P33075|KAD2_SCHPO Adenylate kinase OS=Schizosaccharomyces pombe (strain 972 / ATCC 24843) OX=284812 GN=adk1 PE=1 SV=1	24.375	68.2	1547200	9	96700
O74391	60S ribosomal protein L25-B	rpl25b	79.14	527	sp|O74391|RL25B_SCHPO 60S ribosomal protein L25-B OS=Schizosaccharomyces pombe (strain 972 / ATCC 24843) OX=284812 GN=rpl2502 PE=3 SV=1	15.767	51.8	475420	5	95083
O60155	Putative proline--tRNA ligase C19C7.06	prs1	323.31	484	sp|O60155|PRS1_SCHPO Putative proline--tRNA ligase C19C7.06 OS=Schizosaccharomyces pombe (strain 972 / ATCC 24843) OX=284812 GN=prs1 PE=3 SV=1	78.874	68.7	3983700	27	94849
P28189	40S ribosomal protein S13	rps13	77.087	924	sp|P28189|RS13_SCHPO 40S ribosomal protein S13 OS=Schizosaccharomyces pombe (strain 972 / ATCC 24843) OX=284812 GN=rps13 PE=1 SV=2	16.953	46.4	852460	4	94717
Q09756	Hexokinase-1	hxk1	214.55	1221	sp|Q09756|HXK1_SCHPO Hexokinase-1 OS=Schizosaccharomyces pombe (strain 972 / ATCC 24843) OX=284812 GN=hxk1 PE=1 SV=1	53.597	70	2081700	18	94624
Q09781	40S ribosomal protein S1-A	rps101	94.827	1230	sp|Q09781|RS3A1_SCHPO 40S ribosomal protein S1-A OS=Schizosaccharomyces pombe (strain 972 / ATCC 24843) OX=284812 GN=rps101 PE=3 SV=2	28.488	52	1509800	12	94366
P36604	78 kDa glucose-regulated protein homolog	bip1	323.31	965	sp|P36604|BIP_SCHPO Endoplasmic reticulum chaperone BiP OS=Schizosaccharomyces pombe (strain 972 / ATCC 24843) OX=284812 GN=bip1 PE=3 SV=2	73.226	49.9	2905000	23	93709
P87144	Threonine--tRNA ligase, cytoplasmic	ths1	315.98	1125	sp|P87144|SYTC_SCHPO Threonine--tRNA ligase, cytoplasmic OS=Schizosaccharomyces pombe (strain 972 / ATCC 24843) OX=284812 GN=ths1 PE=3 SV=1	80.137	56.5	3739800	22	93496
O14075	Putative 2-hydroxyacid dehydrogenase UNK4.10		152.56	195	sp|O14075|YEAA_SCHPO Putative 2-hydroxyacid dehydrogenase UNK4.10 OS=Schizosaccharomyces pombe (strain 972 / ATCC 24843) OX=284812 GN=SPAC2E11.10 PE=2 SV=1	36.701	73.1	1866800	12	93339
Q92375	Thioredoxin reductase	trr1	196.34	1456	sp|Q92375|TRXB_SCHPO Thioredoxin reductase OS=Schizosaccharomyces pombe (strain 972 / ATCC 24843) OX=284812 GN=trr1 PE=1 SV=1	34.618	53.4	1119100	7	93254
P04688	Tubulin alpha-1 chain	nda2	321.44	851	sp|P04688|TBA1_SCHPO Tubulin alpha-1 chain OS=Schizosaccharomyces pombe (strain 972 / ATCC 24843) OX=284812 GN=nda2 PE=1 SV=2	51.152	62.4	1953700	14	93034
P0CT61;P0CT60			77.659	876	sp|P0CT61|RL23B_SCHPO 60S ribosomal protein L23-B OS=Schizosaccharomyces pombe (strain 972 / ATCC 24843) OX=284812 GN=rpl2302 PE=3 SV=1;sp|P0CT60|RL23A_SCHPO 60S ribosomal protein L23-A OS=Schizosaccharomyces pombe (strain 972 / ATCC 24843) OX=284812 GN=rp	14.882	48.9	830780	7	92309
Q9Y7J4	Actin-related protein 2/3 complex subunit 3	arc3	81.486	1859	sp|Q9Y7J4|ARPC3_SCHPO Actin-related protein 2/3 complex subunit 3 OS=Schizosaccharomyces pombe (strain 972 / ATCC 24843) OX=284812 GN=arc3 PE=1 SV=1	19.844	36.8	645880	3	92269
O14230	Farnesyl pyrophosphate synthase	fps1	87.816	239	sp|O14230|FPPS_SCHPO Farnesyl pyrophosphate synthase OS=Schizosaccharomyces pombe (strain 972 / ATCC 24843) OX=284812 GN=fps1 PE=1 SV=1	39.516	51.6	1475400	13	92215
P40386	Probable thiamine biosynthetic bifunctional enzyme;Thiamine-phosphate synthase;Hydroxyethylthiazole kinase	thi4	316.69	993	sp|P40386|THI6_SCHPO Probable thiamine biosynthetic bifunctional enzyme OS=Schizosaccharomyces pombe (strain 972 / ATCC 24843) OX=284812 GN=thi4 PE=2 SV=1	55.565	51.5	2463500	19	91239
O13991	Uncharacterized oxidoreductase C26H5.09c	SPAC26H5.09c	188.15	166	sp|O13991|YEG9_SCHPO Uncharacterized oxidoreductase C26H5.09c OS=Schizosaccharomyces pombe (strain 972 / ATCC 24843) OX=284812 GN=SPAC26H5.09c PE=2 SV=3	41.432	44.4	1717800	13	90410
O13370	ATP-dependent RNA helicase ded1	ded1	297.92	58	sp|O13370|DED1_SCHPO ATP-dependent RNA helicase ded1 OS=Schizosaccharomyces pombe (strain 972 / ATCC 24843) OX=284812 GN=ded1 PE=1 SV=1	69.758	58.5	3424400	18	90116
Q10143	Probable prefoldin subunit 3	SPAC3H8.07c	54.868	1312	sp|Q10143|PFD3_SCHPO Probable prefoldin subunit 3 OS=Schizosaccharomyces pombe (strain 972 / ATCC 24843) OX=284812 GN=SPAC3H8.07c PE=3 SV=1	19.445	49.1	1159400	10	89186
Q9UTG4	40S ribosomal protein S26-B	rps26b	29.407	1772	sp|Q9UTG4|RS26B_SCHPO 40S ribosomal protein S26-B OS=Schizosaccharomyces pombe (strain 972 / ATCC 24843) OX=284812 GN=rps2602 PE=3 SV=1	13.862	37.8	356200	2	89049
Q9P772	GMP synthase [glutamine-hydrolyzing]	gua1	283.88	1559	sp|Q9P772|GUAA_SCHPO GMP synthase [glutamine-hydrolyzing] OS=Schizosaccharomyces pombe (strain 972 / ATCC 24843) OX=284812 GN=gua1 PE=3 SV=1	60.044	65.5	2803000	25	87595
O13907	Probable ATP-citrate synthase subunit 2	SPAC22A12.16	204.14	141	sp|O13907|ACL2_SCHPO Probable ATP-citrate synthase subunit 2 OS=Schizosaccharomyces pombe (strain 972 / ATCC 24843) OX=284812 GN=SPAC22A12.16 PE=1 SV=1	53.942	58.9	1743300	13	87165
Q9UUE1	Pyruvate carboxylase	pyr1	323.31	1826	sp|Q9UUE1|PYC_SCHPO Pyruvate carboxylase OS=Schizosaccharomyces pombe (strain 972 / ATCC 24843) OX=284812 GN=pyr1 PE=3 SV=1	130.86	55.8	5382700	43	86818
O94567	Probable asparagine--tRNA ligase, cytoplasmic	nrs1	289.75	800	sp|O94567|SYNC_SCHPO Probable asparagine--tRNA ligase, cytoplasmic OS=Schizosaccharomyces pombe (strain 972 / ATCC 24843) OX=284812 GN=nrs1 PE=3 SV=1	63.869	46.8	2514500	15	86706
P40387	Alpha,alpha-trehalose-phosphate synthase [UDP-forming]	tps1	162.92	994	sp|P40387|TPS1_SCHPO Alpha,alpha-trehalose-phosphate synthase [UDP-forming] OS=Schizosaccharomyces pombe (strain 972 / ATCC 24843) OX=284812 GN=tps1 PE=1 SV=2	58.493	47	1883900	17	85631
O13775	Probable glutamate--tRNA ligase, cytoplasmic	gus1	323.31	94	sp|O13775|SYEC_SCHPO Probable glutamate--tRNA ligase, cytoplasmic OS=Schizosaccharomyces pombe (strain 972 / ATCC 24843) OX=284812 GN=gus1 PE=1 SV=1	80.749	60.3	3482200	26	84933
O94391	Probable cytochrome b5 1	SPBC29A10.16c	60.216	749	sp|O94391|CYB51_SCHPO Probable cytochrome b5 1 OS=Schizosaccharomyces pombe (strain 972 / ATCC 24843) OX=284812 GN=SPBC29A10.16c PE=3 SV=1	13.91	65.3	422540	2	84508
O14317	60S acidic ribosomal protein P2-C	rpp203	38.35	264	sp|O14317|RLA6_SCHPO 60S acidic ribosomal protein P2-C OS=Schizosaccharomyces pombe (strain 972 / ATCC 24843) OX=284812 GN=rpp203 PE=1 SV=2	11.114	55.5	422440	4	84488
O13998	Obg-like ATPase 1	SPAC27E2.03c	266.3	167	sp|O13998|OLA1_SCHPO Obg-like ATPase 1 OS=Schizosaccharomyces pombe (strain 972 / ATCC 24843) OX=284812 GN=SPAC27E2.03c PE=1 SV=1	44.332	55.4	1758300	15	83731
P78820	Acetyl-CoA carboxylase;Biotin carboxylase	cut6	323.31	1072	sp|P78820|ACAC_SCHPO Acetyl-CoA carboxylase OS=Schizosaccharomyces pombe (strain 972 / ATCC 24843) OX=284812 GN=cut6 PE=1 SV=2	256.84	56.9	10288000	70	83643
P79083	Eukaryotic translation initiation factor 3 subunit I	sum1	168.5	1102	sp|P79083|EIF3I_SCHPO Eukaryotic translation initiation factor 3 subunit I OS=Schizosaccharomyces pombe (strain 972 / ATCC 24843) OX=284812 GN=sum1 PE=1 SV=1	36.811	72.3	1738300	15	82777
O43003	Protein mmf1, mitochondrial	mmf1	97.443	363	sp|O43003|MMF1_SCHPO Protein mmf1, mitochondrial OS=Schizosaccharomyces pombe (strain 972 / ATCC 24843) OX=284812 GN=mmf1 PE=3 SV=1	17.543	36.4	825310	3	82531
O94266	Putative hydroxymethylpyrimidine/phosphomethylpyrimidine kinase 2	SPBP8B7.18c	275.51	698	sp|O94266|THI22_SCHPO Putative hydroxymethylpyrimidine/phosphomethylpyrimidine kinase 2 OS=Schizosaccharomyces pombe (strain 972 / ATCC 24843) OX=284812 GN=SPBP8B7.18c PE=3 SV=1	61.354	52.1	2063200	21	82527
O13914	Alanine--tRNA ligase	ala1	323.31	142	sp|O13914|SYA_SCHPO Alanine--tRNA ligase OS=Schizosaccharomyces pombe (strain 972 / ATCC 24843) OX=284812 GN=ala1 PE=1 SV=1	107.38	52.3	4527000	30	82310
Q9P3T6;O14277	40S ribosomal protein S5-B;40S ribosomal protein S5-A	rps5b;rps5a	138.67	1519	sp|Q9P3T6|RS5B_SCHPO 40S ribosomal protein S5-B OS=Schizosaccharomyces pombe (strain 972 / ATCC 24843) OX=284812 GN=rps502 PE=3 SV=1;sp|O14277|RS5A_SCHPO 40S ribosomal protein S5-A OS=Schizosaccharomyces pombe (strain 972 / ATCC 24843) OX=284812 GN=rps5 PE	22.357	51.2	904360	6	82215
Q9USI5	Heat shock protein sti1 homolog	sti1	323.31	1675	sp|Q9USI5|STI1_SCHPO Heat shock protein sti1 homolog OS=Schizosaccharomyces pombe (strain 972 / ATCC 24843) OX=284812 GN=sti1 PE=3 SV=1	65.544	48.1	2913900	20	80942
P78795	Eukaryotic translation initiation factor 3 subunit G	tif35	93.951	1063	sp|P78795|EIF3G_SCHPO Eukaryotic translation initiation factor 3 subunit G OS=Schizosaccharomyces pombe (strain 972 / ATCC 24843) OX=284812 GN=tif35 PE=1 SV=2	31.494	37.6	1210500	7	80700
Q09878	Probable sulfite reductase [NADPH] flavoprotein component	SPCC584.01c	323.31	1263	sp|Q09878|MET10_SCHPO Probable sulfite reductase [NADPH] flavoprotein component OS=Schizosaccharomyces pombe (strain 972 / ATCC 24843) OX=284812 GN=SPCC584.01c PE=3 SV=2	111.35	41.3	3772800	25	80273
O94307	Probable prefoldin subunit 5	bob1	44.994	717	sp|O94307|PFD5_SCHPO Probable prefoldin subunit 5 OS=Schizosaccharomyces pombe (strain 972 / ATCC 24843) OX=284812 GN=bob1 PE=1 SV=1	16.774	53.2	795380	4	79538
O42943	Uncharacterized ABC transporter ATP-binding protein C16H5.08c	SPBC16H5.08c	299.5	354	sp|O42943|YBP8_SCHPO Uncharacterized ABC transporter ATP-binding protein C16H5.08c OS=Schizosaccharomyces pombe (strain 972 / ATCC 24843) OX=284812 GN=SPBC16H5.08c PE=1 SV=1	69.212	54.9	2285300	19	78803
Q1K9C2	Sulfite reductase [NADPH] subunit beta	sir1	323.31	1425	sp|Q1K9C2|MET5_SCHPO Sulfite reductase [NADPH] subunit beta OS=Schizosaccharomyces pombe (strain 972 / ATCC 24843) OX=284812 GN=sir1 PE=3 SV=1	163.84	63.7	5598600	43	77758
P40373	ATP phosphoribosyltransferase	his1	111	987	sp|P40373|HIS1_SCHPO ATP phosphoribosyltransferase OS=Schizosaccharomyces pombe (strain 972 / ATCC 24843) OX=284812 GN=his1 PE=2 SV=1	34.029	58.4	1160800	13	77385
O14369	Probable RNA-binding protein sce3	sce3	118.34	284	sp|O14369|SCE3_SCHPO Probable RNA-binding protein sce3 OS=Schizosaccharomyces pombe (strain 972 / ATCC 24843) OX=284812 GN=sce3 PE=1 SV=1	42.513	53.1	994300	9	76484
O42993	Peptidyl-prolyl cis-trans isomerase	fkh1	102.34	361	sp|O42993|FKBP_SCHPO Peptidyl-prolyl cis-trans isomerase OS=Schizosaccharomyces pombe (strain 972 / ATCC 24843) OX=284812 GN=fkh1 PE=3 SV=1	12.043	59.8	534340	3	76334
Q01475	Small COPII coat GTPase sar1	sar1	74.8	1153	sp|Q01475|SAR1_SCHPO Small COPII coat GTPase sar1 OS=Schizosaccharomyces pombe (strain 972 / ATCC 24843) OX=284812 GN=sar1 PE=1 SV=1	21.28	55.3	905230	7	75436
Q10425	Eukaryotic translation initiation factor 3 subunit B	SPAC25G10.08	323.31	1397	sp|Q10425|EIF3B_SCHPO Eukaryotic translation initiation factor 3 subunit B OS=Schizosaccharomyces pombe (strain 972 / ATCC 24843) OX=284812 GN=SPAC25G10.08 PE=1 SV=1	84.034	63.3	3160600	30	75252
O74905	60S ribosomal protein L9-B	rpl9b	82.317	664	sp|O74905|RL9B_SCHPO 60S ribosomal protein L9-B OS=Schizosaccharomyces pombe (strain 972 / ATCC 24843) OX=284812 GN=rpl902 PE=3 SV=1	21.382	46.6	601720	7	75215
Q09741	Spermidine synthase	SPBC12C2.07c	151.78	1212	sp|Q09741|SPEE_SCHPO Spermidine synthase OS=Schizosaccharomyces pombe (strain 972 / ATCC 24843) OX=284812 GN=SPBC12C2.07c PE=3 SV=1	33.149	51.3	1201600	9	75101
O59681	Uncharacterized protein C18E5.01		83.481	407	sp|O59681|YBS1_SCHPO Uncharacterized protein C18E5.01 OS=Schizosaccharomyces pombe (strain 972 / ATCC 24843) OX=284812 GN=SPBC18E5.01 PE=3 SV=1	38.22	55.3	1196000	11	74750
O59826	Putative voltage-gated potassium channel subunit beta	SPCC965.06	164.06	446	sp|O59826|KCAB_SCHPO Putative voltage-gated potassium channel subunit beta OS=Schizosaccharomyces pombe (strain 972 / ATCC 24843) OX=284812 GN=SPCC965.06 PE=3 SV=1	38.43	61.3	1695400	12	73713
Q9P6N2	Pdp3-interacting factor 1	ptf1	79.919	1545	sp|Q9P6N2|PTF1_SCHPO Pdp3-interacting factor 1 OS=Schizosaccharomyces pombe (strain 972 / ATCC 24843) OX=284812 GN=ptf1 PE=1 SV=1	26.271	41.9	734260	8	73426
Q9P7W3	Probable ATP-citrate synthase subunit 1	SPBC1703.07	323.31	1620	sp|Q9P7W3|ACL1_SCHPO Probable ATP-citrate synthase subunit 1 OS=Schizosaccharomyces pombe (strain 972 / ATCC 24843) OX=284812 GN=SPBC1703.07 PE=1 SV=1	67.203	67	2785300	23	73298
O74413	Chorismate synthase		153.03	535	sp|O74413|AROC_SCHPO Chorismate synthase OS=Schizosaccharomyces pombe (strain 972 / ATCC 24843) OX=284812 GN=SPCC1223.14 PE=3 SV=2	42.324	45.3	1610200	11	73192
Q09864	Heat shock protein 60, mitochondrial	hsp60	323.31	1259	sp|Q09864|HSP60_SCHPO Heat shock protein 60, mitochondrial OS=Schizosaccharomyces pombe (strain 972 / ATCC 24843) OX=284812 GN=hsp60 PE=1 SV=1	62.167	58.9	2684400	21	72552
Q9P6K7	tRNA-aminoacylation cofactor arc1	SPAC30C2.04	273.22	1540	sp|Q9P6K7|ARC1_SCHPO tRNA-aminoacylation cofactor arc1 OS=Schizosaccharomyces pombe (strain 972 / ATCC 24843) OX=284812 GN=SPAC30C2.04 PE=3 SV=1	50.606	49.6	1810200	15	72409
Q9P546	40S ribosomal protein S0-B	rps0b	216.31	1528	sp|Q9P546|RSSA2_SCHPO 40S ribosomal protein S0-B OS=Schizosaccharomyces pombe (strain 972 / ATCC 24843) OX=284812 GN=rps002 PE=1 SV=1	31.42	57.1	940020	8	72309
Q9USM6	Probable cytochrome b5 2	oca8	88.957	1686	sp|Q9USM6|CYB52_SCHPO Probable cytochrome b5 2 OS=Schizosaccharomyces pombe (strain 972 / ATCC 24843) OX=284812 GN=oca8 PE=3 SV=1	14.252	51.9	505130	3	72162
Q11118	Protein wos2	wos2	62.986	1419	sp|Q11118|WOS2_SCHPO Protein wos2 OS=Schizosaccharomyces pombe (strain 972 / ATCC 24843) OX=284812 GN=wos2 PE=2 SV=1	20.951	33.9	432730	6	72121
O14351	Uncharacterized oxidoreductase C30D10.05c	SPBC30D10.05c	96.388	277	sp|O14351|YB45_SCHPO Uncharacterized oxidoreductase C30D10.05c OS=Schizosaccharomyces pombe (strain 972 / ATCC 24843) OX=284812 GN=SPBC30D10.05c PE=3 SV=1	26.645	46.2	1297700	9	72094
O59794	60S ribosomal protein L17-B	rpl17b	35.773	434	sp|O59794|RL17B_SCHPO 60S ribosomal protein L17-B OS=Schizosaccharomyces pombe (strain 972 / ATCC 24843) OX=284812 GN=rpl1702 PE=3 SV=1	20.827	52.4	717380	11	71738
O14344	Inosine-5-monophosphate dehydrogenase	gua1	134.71	275	sp|O14344|IMDH_SCHPO Inosine-5-monophosphate dehydrogenase OS=Schizosaccharomyces pombe (strain 972 / ATCC 24843) OX=284812 GN=gua1 PE=2 SV=1	57.026	50.4	1500900	14	71472
Q9P7R0	Pentafunctional AROM polypeptide;3-dehydroquinate synthase;3-phosphoshikimate 1-carboxyvinyltransferase;Shikimate kinase;3-dehydroquinate dehydratase;Shikimate dehydrogenase	aro1	323.31	1605	sp|Q9P7R0|ARO1_SCHPO Pentafunctional AROM polypeptide OS=Schizosaccharomyces pombe (strain 972 / ATCC 24843) OX=284812 GN=aro1 PE=1 SV=1	173.78	48.8	5713500	43	71418
P35551	rRNA 2-O-methyltransferase fibrillarin	fib1	109.78	945	sp|P35551|FBRL_SCHPO rRNA 2-O-methyltransferase fibrillarin OS=Schizosaccharomyces pombe (strain 972 / ATCC 24843) OX=284812 GN=fib1 PE=1 SV=1	32.04	44.6	1279600	10	71087
O74389	Meiotically up-regulated gene 176 protein	mug176	118.79	526	sp|O74389|MU176_SCHPO Meiotically up-regulated gene 176 protein OS=Schizosaccharomyces pombe (strain 972 / ATCC 24843) OX=284812 GN=mug176 PE=1 SV=1	45.793	39.9	1274300	9	70794
P04913	Histone H2B-alpha	htb1	30.126	854	sp|P04913|H2B1_SCHPO Histone H2B-alpha OS=Schizosaccharomyces pombe (strain 972 / ATCC 24843) OX=284812 GN=htb1 PE=1 SV=3	13.819	35.7	495330	2	70761
P22774-2;P22774	Heat shock 70 kDa protein, mitochondrial	ssp1	323.31	913	sp|P22774-2|HSP7M_SCHPO Isoform Short of Iron-sulfur cluster biogenesis chaperone, mitochondrial OS=Schizosaccharomyces pombe (strain 972 / ATCC 24843) OX=284812 GN=ssc1;sp|P22774|HSP7M_SCHPO Iron-sulfur cluster biogenesis chaperone, mitochondrial OS=Schiz	69.411	64	2465400	20	70441
Q9P7F2	Copper amine oxidase 1	cao1	258.77	1581	sp|Q9P7F2|CAO1_SCHPO Copper amine oxidase 1 OS=Schizosaccharomyces pombe (strain 972 / ATCC 24843) OX=284812 GN=cao1 PE=1 SV=1	81.24	36.7	2289800	16	69388
Q10232	60S ribosomal protein L9-A	rpl9a	168.34	1347	sp|Q10232|RL9A_SCHPO 60S ribosomal protein L9-A OS=Schizosaccharomyces pombe (strain 972 / ATCC 24843) OX=284812 GN=rpl901 PE=3 SV=1	21.513	42.6	762890	6	69354
O59804	10 kDa heat shock protein, mitochondrial	hsp10	39.038	436	sp|O59804|CH10_SCHPO 10 kDa heat shock protein, mitochondrial OS=Schizosaccharomyces pombe (strain 972 / ATCC 24843) OX=284812 GN=hsp10 PE=1 SV=1	11.282	38.5	407690	2	67948
O94255	Carbonic anhydrase	SPBP8B7.05c	74.593	696	sp|O94255|CAN_SCHPO Carbonic anhydrase OS=Schizosaccharomyces pombe (strain 972 / ATCC 24843) OX=284812 GN=SPBP8B7.05c PE=1 SV=2	37.009	39.9	1424100	7	67812
O59743	Uncharacterized protein C530.07c	SPBC530.07c	90.14	420	sp|O59743|YN27_SCHPO Uncharacterized protein C530.07c OS=Schizosaccharomyces pombe (strain 972 / ATCC 24843) OX=284812 GN=SPBC530.07c PE=4 SV=1	27.839	62.4	1005000	8	67001
Q9UT48	Eukaryotic translation initiation factor 3 subunit H	eif3h	66.88	1739	sp|Q9UT48|EIF3H_SCHPO Eukaryotic translation initiation factor 3 subunit H OS=Schizosaccharomyces pombe (strain 972 / ATCC 24843) OX=284812 GN=eif3h PE=1 SV=1	39.78	21	735640	5	66876
O42868	RNA polymerase II subunit A C-terminal domain phosphatase ssu72	ssu72	4.544	321	sp|O42868|SSU72_SCHPO RNA polymerase II subunit A C-terminal domain phosphatase ssu72 OS=Schizosaccharomyces pombe (strain 972 / ATCC 24843) OX=284812 GN=ssu72 PE=1 SV=1	22.595	14.2	1003100	2	66871
O74718	Eukaryotic peptide chain release factor GTP-binding subunit	sup35	323.31	595	sp|O74718|ERF3_SCHPO Eukaryotic peptide chain release factor GTP-binding subunit OS=Schizosaccharomyces pombe (strain 972 / ATCC 24843) OX=284812 GN=sup35 PE=1 SV=2	72.555	49.4	2406800	18	66856
O36032	Glutaredoxin-1	grx1	66.307	299	sp|O36032|GLRX1_SCHPO Glutaredoxin-1 OS=Schizosaccharomyces pombe (strain 972 / ATCC 24843) OX=284812 GN=grx1 PE=3 SV=1	11.261	68.3	400140	3	66690
O14370	Branched-chain-amino-acid aminotransferase, mitochondrial	eca39	123.23	285	sp|O14370|BCA1_SCHPO Branched-chain-amino-acid aminotransferase, mitochondrial OS=Schizosaccharomyces pombe (strain 972 / ATCC 24843) OX=284812 GN=eca39 PE=1 SV=3	47.855	26	1515600	9	65896
P41003	Structural maintenance of chromosomes protein 2	cut14	1.5974	1004	sp|P41003|SMC2_SCHPO Structural maintenance of chromosomes protein 2 OS=Schizosaccharomyces pombe (strain 972 / ATCC 24843) OX=284812 GN=cut14 PE=1 SV=2	134.14	2.6	4448600	1	65420
O13944	Oxysterol-binding protein homolog C23H4.01c		36.427	154	sp|O13944|YEH1_SCHPO Oxysterol-binding protein homolog C23H4.01c OS=Schizosaccharomyces pombe (strain 972 / ATCC 24843) OX=284812 GN=SPAC23H4.01c PE=1 SV=2	106.81	12.9	3382500	5	65047
O60085	Methionine aminopeptidase 2	fma2	145.06	464	sp|O60085|MAP2_SCHPO Methionine aminopeptidase 2 OS=Schizosaccharomyces pombe (strain 972 / ATCC 24843) OX=284812 GN=fma2 PE=3 SV=1	47.271	46.7	1363800	11	64945
Q10490	Putative leucine--tRNA ligase, cytoplasmic	lrs1	323.31	1414	sp|Q10490|SYLC_SCHPO Putative leucine--tRNA ligase, cytoplasmic OS=Schizosaccharomyces pombe (strain 972 / ATCC 24843) OX=284812 GN=lrs1 PE=1 SV=1	126.45	51.8	3943100	37	64640
P56329	Probable eukaryotic translation initiation factor 2 subunit beta	tif212	136.19	1051	sp|P56329|IF2B_SCHPO Probable eukaryotic translation initiation factor 2 subunit beta OS=Schizosaccharomyces pombe (strain 972 / ATCC 24843) OX=284812 GN=tif212 PE=1 SV=2	35.96	56.7	1216200	11	64012
P41390	Amidophosphoribosyltransferase	ade4	244.59	1006	sp|P41390|PUR1_SCHPO Amidophosphoribosyltransferase OS=Schizosaccharomyces pombe (strain 972 / ATCC 24843) OX=284812 GN=ade4 PE=1 SV=1	59.831	58.9	1920000	16	64000
O14321	Sterol 24-C-methyltransferase erg6	erg6	142.2	266	sp|O14321|ERG6_SCHPO Sterol 24-C-methyltransferase erg6 OS=Schizosaccharomyces pombe (strain 972 / ATCC 24843) OX=284812 GN=erg6 PE=2 SV=1	42.867	54	1150000	10	63891
O42984	40S ribosomal protein S17-A	rps17a	53.877	360	sp|O42984|RS17A_SCHPO 40S ribosomal protein S17-A OS=Schizosaccharomyces pombe (strain 972 / ATCC 24843) OX=284812 GN=rps1701 PE=3 SV=1	15.514	55.7	442680	6	63241
P0CT63;P0CT62			9.6931	877	sp|P0CT63|RS30_SCHPO 40S ribosomal protein S30-B OS=Schizosaccharomyces pombe (strain 972 / ATCC 24843) OX=284812 GN=rps3002 PE=3 SV=1;sp|P0CT62|RS30A_SCHPO 40S ribosomal protein S30-A OS=Schizosaccharomyces pombe (strain 972 / ATCC 24843) OX=284812 GN=rps	6.9101	18	126320	1	63158
Q10179	Putative glycine--tRNA ligase	grs1	283.1	1328	sp|Q10179|SYG_SCHPO Putative glycine--tRNA ligase OS=Schizosaccharomyces pombe (strain 972 / ATCC 24843) OX=284812 GN=grs1 PE=3 SV=1	74.004	47.9	2177200	23	62205
Q09702	Negative regulator of differentiation 1	nrd1	135.77	1199	sp|Q09702|NRD1_SCHPO Negative regulator of differentiation 1 OS=Schizosaccharomyces pombe (strain 972 / ATCC 24843) OX=284812 GN=nrd1 PE=1 SV=1	57.76	42.2	1300700	11	61940
Q10140	Uncharacterized protein C3H8.04	SPAC3H8.04	205.34	1311	sp|Q10140|YAS4_SCHPO Uncharacterized protein C3H8.04 OS=Schizosaccharomyces pombe (strain 972 / ATCC 24843) OX=284812 GN=SPAC3H8.04 PE=4 SV=1	38.474	51.5	1174500	9	61815
Q09795	Uncharacterized peptidase C22G7.01c		200.47	1236	sp|Q09795|YAA1_SCHPO Uncharacterized peptidase C22G7.01c OS=Schizosaccharomyces pombe (strain 972 / ATCC 24843) OX=284812 GN=SPAC22G7.01c PE=3 SV=4	66.68	52.8	1782300	15	61458
Q9USR7	60S ribosomal protein L38-1	rpl38a	11.841	1699	sp|Q9USR7|RL38A_SCHPO 60S ribosomal protein L38-1 OS=Schizosaccharomyces pombe (strain 972 / ATCC 24843) OX=284812 GN=rpl3801 PE=3 SV=1	8.4919	33.8	182400	3	60800
O60105	Adenylosuccinate lyase	ade8	323.31	471	sp|O60105|PUR8_SCHPO Adenylosuccinate lyase OS=Schizosaccharomyces pombe (strain 972 / ATCC 24843) OX=284812 GN=ade8 PE=3 SV=1	54.307	64.7	1576200	15	60623
P50514	Probable argininosuccinate lyase	argx	218.47	1028	sp|P50514|ARLZ_SCHPO Probable argininosuccinate lyase OS=Schizosaccharomyces pombe (strain 972 / ATCC 24843) OX=284812 GN=argx PE=3 SV=1	51.571	61.3	1508100	13	60322
O60064	Probable mannose-1-phosphate guanyltransferase	SPBC13G1.02	99.666	459	sp|O60064|YBB2_SCHPO Probable mannose-1-phosphate guanyltransferase OS=Schizosaccharomyces pombe (strain 972 / ATCC 24843) OX=284812 GN=SPBC13G1.02 PE=3 SV=1	46.096	44.9	1323900	9	60176
O13917	Hypoxanthine-guanine phosphoribosyltransferase	hpt1	58.471	143	sp|O13917|HPRT_SCHPO Hypoxanthine-guanine phosphoribosyltransferase OS=Schizosaccharomyces pombe (strain 972 / ATCC 24843) OX=284812 GN=hpt1 PE=3 SV=1	23.572	34.5	539710	5	59968
O14139	Chromodomain helicase hrp3	hrp3	13.182	218	sp|O14139|HRP3_SCHPO Chromodomain helicase hrp3 OS=Schizosaccharomyces pombe (strain 972 / ATCC 24843) OX=284812 GN=hrp3 PE=1 SV=1	159.38	6.1	4570300	2	59355
O42699	60S ribosomal protein L19-B	rpl19b	19.685	309	sp|O42699|RL19B_SCHPO 60S ribosomal protein L19-B OS=Schizosaccharomyces pombe (strain 972 / ATCC 24843) OX=284812 GN=rpl1902 PE=2 SV=2	22.753	39.9	474280	14	59285
Q9Y822	54S ribosomal protein L16, mitochondrial	mrpl16	6.6249	1897	sp|Q9Y822|RM16_SCHPO 54S ribosomal protein L16, mitochondrial OS=Schizosaccharomyces pombe (strain 972 / ATCC 24843) OX=284812 GN=mrpl16 PE=3 SV=1	24.387	17.2	822370	1	58741
Q09188	ADP,ATP carrier protein	anc1	227.66	1178	sp|Q09188|ADT_SCHPO ADP,ATP carrier protein OS=Schizosaccharomyces pombe (strain 972 / ATCC 24843) OX=284812 GN=anc1 PE=1 SV=1	35.02	45.7	935230	9	58452
Q9HGL8	60S ribosomal protein L43-A	rpl43a	31.737	1505	sp|Q9HGL8|RL43A_SCHPO 60S ribosomal protein L43-A OS=Schizosaccharomyces pombe (strain 972 / ATCC 24843) OX=284812 GN=rpl4301 PE=3 SV=1	10.422	29.8	233360	2	58339
Q00472	4-nitrophenylphosphatase	pho2	74.801	1151	sp|Q00472|PNPP_SCHPO 4-nitrophenylphosphatase OS=Schizosaccharomyces pombe (strain 972 / ATCC 24843) OX=284812 GN=pho2 PE=4 SV=2	32.793	47.7	975650	7	57391
Q9UUF2	Probable methionine--tRNA ligase, cytoplasmic	rar1	300.22	1833	sp|Q9UUF2|SYMC_SCHPO Probable methionine--tRNA ligase, cytoplasmic OS=Schizosaccharomyces pombe (strain 972 / ATCC 24843) OX=284812 GN=rar1 PE=3 SV=1	88.88	49.4	2454200	22	57074
O00091	Glucose-6-phosphate 1-dehydrogenase	zwf1	217.43	52	sp|O00091|G6PD_SCHPO Glucose-6-phosphate 1-dehydrogenase OS=Schizosaccharomyces pombe (strain 972 / ATCC 24843) OX=284812 GN=zwf1 PE=3 SV=2	57.204	58.4	1596800	13	57028
O43021	Oxysterol-binding protein homolog C354.07c	SPBC354.07c	74.707	370	sp|O43021|YGV7_SCHPO Oxysterol-binding protein homolog C354.07c OS=Schizosaccharomyces pombe (strain 972 / ATCC 24843) OX=284812 GN=SPBC354.07c PE=3 SV=4	45.066	39.3	846710	9	56447
Q09755	Putative phospho-2-dehydro-3-deoxyheptonate aldolase	SPAC24H6.10c	193.1	1220	sp|Q09755|AROF_SCHPO Putative phospho-2-dehydro-3-deoxyheptonate aldolase OS=Schizosaccharomyces pombe (strain 972 / ATCC 24843) OX=284812 GN=SPAC24H6.10c PE=3 SV=1	39.76	53.3	888700	9	55544
Q09794	Protein ura1;Glutamine-dependent carbamoyl-phosphate synthase;Aspartate carbamoyltransferase	ura1	323.31	1235	sp|Q09794|PYR1_SCHPO Protein ura1 OS=Schizosaccharomyces pombe (strain 972 / ATCC 24843) OX=284812 GN=ura1 PE=1 SV=1	248.31	48.8	6086800	57	55335
Q9P782	Uncharacterized protein C1711.08	SPBC1711.08	50.925	1563	sp|Q9P782|YNY8_SCHPO Uncharacterized protein C1711.08 OS=Schizosaccharomyces pombe (strain 972 / ATCC 24843) OX=284812 GN=SPBC1711.08 PE=2 SV=1	37.419	54.5	772590	8	55185
Q9URX7	Protein arginine N-methyltransferase 1	rmt1	139.51	1648	sp|Q9URX7|ANM1_SCHPO Protein arginine N-methyltransferase 1 OS=Schizosaccharomyces pombe (strain 972 / ATCC 24843) OX=284812 GN=rmt1 PE=1 SV=2	39.018	45.3	1145800	11	54561
O59797	Putative nucleosome assembly protein C364.06	SPCC364.06	66.201	435	sp|O59797|YCO6_SCHPO Putative nucleosome assembly protein C364.06 OS=Schizosaccharomyces pombe (strain 972 / ATCC 24843) OX=284812 GN=SPCC364.06 PE=1 SV=1	44.347	32.8	872780	5	54549
Q9USX4	60S ribosomal protein L33-A	rpl33a	12.18	1713	sp|Q9USX4|RL33A_SCHPO 60S ribosomal protein L33-A OS=Schizosaccharomyces pombe (strain 972 / ATCC 24843) OX=284812 GN=rpl35b PE=3 SV=2	12.187	27.8	488180	4	54242
P87058	La protein homolog	sla1	144.09	1109	sp|P87058|LAH1_SCHPO La protein homolog OS=Schizosaccharomyces pombe (strain 972 / ATCC 24843) OX=284812 GN=sla1 PE=1 SV=1	34.616	58.1	807400	7	53827
Q09181	Putative ATP-dependent RNA helicase ste13	ste13	198.93	1176	sp|Q09181|DHH1_SCHPO Putative ATP-dependent RNA helicase ste13 OS=Schizosaccharomyces pombe (strain 972 / ATCC 24843) OX=284812 GN=ste13 PE=3 SV=1	54.794	46.6	1382000	13	53155
P09322	Histone H4	hhf1	57.751	867	sp|P09322|H4_SCHPO Histone H4 OS=Schizosaccharomyces pombe (strain 972 / ATCC 24843) OX=284812 GN=hhf1 PE=1 SV=2	11.423	42.7	316260	4	52710
O74960	Probable sphingolipid long chain base-responsive protein pil1	pil1	94.769	678	sp|O74960|PIL1_SCHPO Probable sphingolipid long chain base-responsive protein pil1 OS=Schizosaccharomyces pombe (strain 972 / ATCC 24843) OX=284812 GN=pil1 PE=1 SV=1	39.805	31.6	892410	6	52495
Q9P785	LisH domain-containing protein C1711.05	SPBC1711.05	115.2	1566	sp|Q9P785|YNY5_SCHPO LisH domain-containing protein C1711.05 OS=Schizosaccharomyces pombe (strain 972 / ATCC 24843) OX=284812 GN=SPBC1711.05 PE=4 SV=1	47.427	15.7	469610	5	52178
Q9P3W6	Uncharacterized protein C458.02c	SPAC458.02c	38.595	1525	sp|Q9P3W6|YLI2_SCHPO Uncharacterized protein C458.02c OS=Schizosaccharomyces pombe (strain 972 / ATCC 24843) OX=284812 GN=SPAC458.02c PE=1 SV=1	53.735	34.8	1355200	8	52123
P87216	Protein vip1	vip1	166.55	1138	sp|P87216|VIPI_SCHPO Protein vip1 OS=Schizosaccharomyces pombe (strain 972 / ATCC 24843) OX=284812 GN=vip1 PE=1 SV=1	27.459	76.3	882450	9	51909
Q9P7F8	ATPase get3	get3	65.826	1582	sp|Q9P7F8|GET3_SCHPO ATPase get3 OS=Schizosaccharomyces pombe (strain 972 / ATCC 24843) OX=284812 GN=get3 PE=1 SV=1	36.548	24.6	720810	4	51487
P28758	Superoxide dismutase [Cu-Zn]	sod1	211.91	927	sp|P28758|SODC_SCHPO Superoxide dismutase [Cu-Zn] OS=Schizosaccharomyces pombe (strain 972 / ATCC 24843) OX=284812 GN=sod1 PE=2 SV=1	15.912	59.1	406680	5	50835
Q9P6I2	Cys-Gly metallodipeptidase dug1	dug1	99.627	1530	sp|Q9P6I2|DUG1_SCHPO Cys-Gly metallodipeptidase dug1 OS=Schizosaccharomyces pombe (strain 972 / ATCC 24843) OX=284812 GN=dug1 PE=2 SV=2	52.84	34.9	965760	9	50830
P78814	Pre-mRNA-splicing factor srp2	srp2	114.39	1070	sp|P78814|SRP2_SCHPO Pre-mRNA-splicing factor srp2 OS=Schizosaccharomyces pombe (strain 972 / ATCC 24843) OX=284812 GN=srp2 PE=1 SV=2	42.566	42.2	863670	10	50804
Q42598	Threonine synthase	thrc	199.3	1429	sp|Q42598|THRC_SCHPO Threonine synthase OS=Schizosaccharomyces pombe (strain 972 / ATCC 24843) OX=284812 GN=thrc PE=1 SV=1	57.631	59.1	1314400	15	50554
O43060	Eukaryotic translation initiation factor 3 subunit F	eif3f	78.333	388	sp|O43060|EIF3F_SCHPO Eukaryotic translation initiation factor 3 subunit F OS=Schizosaccharomyces pombe (strain 972 / ATCC 24843) OX=284812 GN=eif3f PE=1 SV=1	33.251	32.1	656120	6	50471
O14105	Ribulose-phosphate 3-epimerase	SPAC31G5.05c	51.739	208	sp|O14105|RPE_SCHPO Ribulose-phosphate 3-epimerase OS=Schizosaccharomyces pombe (strain 972 / ATCC 24843) OX=284812 GN=SPAC31G5.05c PE=3 SV=1	25.205	48.7	501820	4	50182
O74790	Monothiol glutaredoxin-4	grx4	80.623	617	sp|O74790|GLRX4_SCHPO Monothiol glutaredoxin-4 OS=Schizosaccharomyces pombe (strain 972 / ATCC 24843) OX=284812 GN=grx4 PE=1 SV=1	27.099	35.2	551260	4	50114
P22068	ATP synthase subunit beta, mitochondrial	atp2	323.31	911	sp|P22068|ATPB_SCHPO ATP synthase subunit beta, mitochondrial OS=Schizosaccharomyces pombe (strain 972 / ATCC 24843) OX=284812 GN=atp2 PE=1 SV=1	56.875	57.7	1299900	13	49997
Q09892	Mitogen-activated protein kinase sty1	sty1	56.052	1267	sp|Q09892|HOG1_SCHPO Mitogen-activated protein kinase sty1 OS=Schizosaccharomyces pombe (strain 972 / ATCC 24843) OX=284812 GN=sty1 PE=1 SV=1	40.222	38.1	793460	8	49591
O13929	Uncharacterized protein C23C4.09c	SPAC23C4.09c	35.884	149	sp|O13929|YF69_SCHPO Uncharacterized protein C23C4.09c OS=Schizosaccharomyces pombe (strain 972 / ATCC 24843) OX=284812 GN=SPAC23C4.09c PE=3 SV=1	15.042	45	347030	4	49575
O94476	Eukaryotic translation initiation factor 6	tif6	167.22	776	sp|O94476|IF6_SCHPO Eukaryotic translation initiation factor 6 OS=Schizosaccharomyces pombe (strain 972 / ATCC 24843) OX=284812 GN=tif6 PE=3 SV=1	26.232	25.8	396500	2	49563
O14228	Probable phosphoribosylformylglycinamidine synthase	ade3	323.31	238	sp|O14228|PUR4_SCHPO Probable phosphoribosylformylglycinamidine synthase OS=Schizosaccharomyces pombe (strain 972 / ATCC 24843) OX=284812 GN=ade3 PE=3 SV=1	144.86	43.8	3206600	29	49332
P57728	60S ribosomal protein L28-B	rpl28b	26.484	1052	sp|P57728|RL28B_SCHPO 60S ribosomal protein L28-B OS=Schizosaccharomyces pombe (strain 972 / ATCC 24843) OX=284812 GN=rpl2801 PE=1 SV=1	16.685	39.2	442030	3	49114
P78825	Adenosine kinase	ado1	183.92	1073	sp|P78825|ADK_SCHPO Adenosine kinase OS=Schizosaccharomyces pombe (strain 972 / ATCC 24843) OX=284812 GN=ado1 PE=2 SV=2	36.708	42.6	687430	6	49102
O94273	Peptidyl-prolyl cis-trans isomerase B	cyp4	103.59	702	sp|O94273|PPIB_SCHPO Peptidyl-prolyl cis-trans isomerase B OS=Schizosaccharomyces pombe (strain 972 / ATCC 24843) OX=284812 GN=cyp4 PE=3 SV=1	22.156	61.7	535750	7	48705
O74885	Putative dioxygenase C576.01c		49.421	654	sp|O74885|XANA_SCHPO Alpha-ketoglutarate-dependent xanthine dioxygenase xan1 OS=Schizosaccharomyces pombe (strain 972 / ATCC 24843) OX=284812 GN=xan1 PE=1 SV=2	46.604	41.6	866510	10	48140
P79060	Protein translation factor sui1	sui1	85.105	1098	sp|P79060|SUI1_SCHPO Protein translation factor sui1 OS=Schizosaccharomyces pombe (strain 972 / ATCC 24843) OX=284812 GN=sui1 PE=3 SV=3	12.434	73.4	236300	4	47261
Q9Y7Y8	Probable glutamine--tRNA ligase	qrs1	199.24	1890	sp|Q9Y7Y8|SYQ_SCHPO Probable glutamine--tRNA ligase OS=Schizosaccharomyces pombe (strain 972 / ATCC 24843) OX=284812 GN=qrs1 PE=3 SV=1	92.072	50.1	2480800	25	46808
Q9P7U2;G2TRN6	Putative aryl-alcohol dehydrogenase C977.14c;Putative aryl-alcohol dehydrogenase C750.01	SPAC977.14c;SPAC750.01	194.41	1615	sp|Q9P7U2|YI7E_SCHPO Putative aryl-alcohol dehydrogenase C977.14c OS=Schizosaccharomyces pombe (strain 972 / ATCC 24843) OX=284812 GN=SPAC977.14c PE=1 SV=1;sp|G2TRN6|YLZ1_SCHPO Putative aryl-alcohol dehydrogenase C750.01 OS=Schizosaccharomyces pombe (strai	39.914	47.3	1100000	13	45833
Q9UTS6	Dynein light chain Tctex-type	dlc1	44.827	1803	sp|Q9UTS6|DYLT_SCHPO Dynein light chain Tctex-type OS=Schizosaccharomyces pombe (strain 972 / ATCC 24843) OX=284812 GN=dlc1 PE=1 SV=1	12.254	64	411990	3	45777
Q9UTG1	Putative purine nucleoside phosphorylase	SPAC1805.16c	86.168	1771	sp|Q9UTG1|PNPH_SCHPO Putative purine nucleoside phosphorylase OS=Schizosaccharomyces pombe (strain 972 / ATCC 24843) OX=284812 GN=SPAC1805.16c PE=3 SV=1	34.238	72.7	818950	8	45497
P58234	40S ribosomal protein S19-A	rps19a	71.762	1053	sp|P58234|RS19A_SCHPO 40S ribosomal protein S19-A OS=Schizosaccharomyces pombe (strain 972 / ATCC 24843) OX=284812 GN=rps1901 PE=2 SV=1	16.15	41.7	408590	5	45399
O74538	60S ribosomal protein L27-B	rpl27b	42.246	582	sp|O74538|RL27B_SCHPO 60S ribosomal protein L27-B OS=Schizosaccharomyces pombe (strain 972 / ATCC 24843) OX=284812 GN=rpl2702 PE=3 SV=1	15.305	65.4	272350	9	45391
Q9P7V8	Probable mitochondrial phosphate carrier protein	SPBC1703.13c	218.82	1618	sp|Q9P7V8|MPCP_SCHPO Probable mitochondrial phosphate carrier protein OS=Schizosaccharomyces pombe (strain 972 / ATCC 24843) OX=284812 GN=SPBC1703.13c PE=3 SV=1	33.843	58.8	723320	7	45207
Q9UUC7	Cytoplasmic tRNA 2-thiolation protein 2	ctu2	2.0736	1825	sp|Q9UUC7|CTU2_SCHPO Cytoplasmic tRNA 2-thiolation protein 2 OS=Schizosaccharomyces pombe (strain 972 / ATCC 24843) OX=284812 GN=ctu2 PE=1 SV=1	40.741	7.7	944120	1	44958
O94319	Protein transport protein sec13	sec13	74.322	724	sp|O94319|SEC13_SCHPO Protein transport protein sec13 OS=Schizosaccharomyces pombe (strain 972 / ATCC 24843) OX=284812 GN=sec13 PE=1 SV=1	32.568	46.1	761370	6	44787
O60119	Vesicle-associated membrane protein-associated protein C16G5.05c	SPBC16G5.05c	83.712	476	sp|O60119|SCS2_SCHPO Vesicle-associated membrane protein-associated protein scs2 OS=Schizosaccharomyces pombe (strain 972 / ATCC 24843) OX=284812 GN=scs2 PE=1 SV=1	41.234	47.8	670170	4	44678
P04910;P04909	Histone H2A-beta;Histone H2A-alpha	hta2;hta1	18.101	853	sp|P04910|H2A2_SCHPO Histone H2A-beta OS=Schizosaccharomyces pombe (strain 972 / ATCC 24843) OX=284812 GN=hta2 PE=1 SV=2;sp|P04909|H2A1_SCHPO Histone H2A-alpha OS=Schizosaccharomyces pombe (strain 972 / ATCC 24843) OX=284812 GN=hta1 PE=1 SV=3	13.776	35.1	223170	3	44633
O94641	Heat shock protein 104	hsp104	294.61	822	sp|O94641|HS104_SCHPO Heat shock protein 104 OS=Schizosaccharomyces pombe (strain 972 / ATCC 24843) OX=284812 GN=hsp104 PE=3 SV=1	100.51	53	1917400	25	44590
O59790	Serine/threonine-protein kinase ark1	ark1	40.876	432	sp|O59790|ARK1_SCHPO Serine/threonine-protein kinase ark1 OS=Schizosaccharomyces pombe (strain 972 / ATCC 24843) OX=284812 GN=ark1 PE=1 SV=2	40.596	33	843320	9	44385
Q9Y7T8	Probable proteasome subunit beta type-3	pup3	30.434	1881	sp|Q9Y7T8|PSB3_SCHPO Probable proteasome subunit beta type-3 OS=Schizosaccharomyces pombe (strain 972 / ATCC 24843) OX=284812 GN=pup3 PE=3 SV=1	22.661	13.7	310500	3	44357
O74433	Cytochrome b-c1 complex subunit 9	qcr9	22.418	545	sp|O74433|QCR9_SCHPO Cytochrome b-c1 complex subunit 9 OS=Schizosaccharomyces pombe (strain 972 / ATCC 24843) OX=284812 GN=qcr9 PE=3 SV=2	7.7996	73.1	221240	3	44248
Q9P7L1	Thioredoxin domain-containing protein C21C3.12c	SPBC21C3.12c	80.105	1598	sp|Q9P7L1|YOSC_SCHPO Thioredoxin domain-containing protein C21C3.12c OS=Schizosaccharomyces pombe (strain 972 / ATCC 24843) OX=284812 GN=SPBC21C3.12c PE=3 SV=1	13.932	73.4	397720	6	44191
O94514	Nucleolar protein 56	nop56	133.41	785	sp|O94514|NOP56_SCHPO Nucleolar protein 56 OS=Schizosaccharomyces pombe (strain 972 / ATCC 24843) OX=284812 GN=nop56 PE=3 SV=1	55.388	45.5	1189300	11	44048
O14081	Putative alpha,alpha-trehalose-phosphate synthase [UDP-forming] 106 kDa subunit		212.77	198	sp|O14081|TPSX_SCHPO Putative alpha,alpha-trehalose-phosphate synthase [UDP-forming] 106 kDa subunit OS=Schizosaccharomyces pombe (strain 972 / ATCC 24843) OX=284812 GN=SPAC2E11.16c PE=1 SV=1	106.82	43	1891800	22	43995
Q06975	H/ACA ribonucleoprotein complex subunit 1	gar1	25.073	1162	sp|Q06975|GAR1_SCHPO H/ACA ribonucleoprotein complex subunit gar1 OS=Schizosaccharomyces pombe (strain 972 / ATCC 24843) OX=284812 GN=gar1 PE=2 SV=1	20.131	29.9	307190	4	43884
Q10349	Putative phosphoserine aminotransferase	SPAC1F12.07	129.35	1388	sp|Q10349|SERC_SCHPO Putative phosphoserine aminotransferase OS=Schizosaccharomyces pombe (strain 972 / ATCC 24843) OX=284812 GN=SPAC1F12.07 PE=3 SV=1	42.797	50.4	789520	8	43862
O94461	Probable phosphatase C1687.21		51.541	773	sp|O94461|YFFL_SCHPO Probable phosphatase C1687.21 OS=Schizosaccharomyces pombe (strain 972 / ATCC 24843) OX=284812 GN=SPAC1687.21 PE=3 SV=1	23.698	41.6	434350	5	43435
O42849	Phenylalanine--tRNA ligase beta subunit	frs1	176.95	317	sp|O42849|SYFB_SCHPO Phenylalanine--tRNA ligase beta subunit OS=Schizosaccharomyces pombe (strain 972 / ATCC 24843) OX=284812 GN=frs1 PE=3 SV=1	66.849	46.5	1470100	14	43239
Q9UUE3	Putative lysine N-acyltransferase C17G9.06c	SPBC17G9.06c	87.215	1828	sp|Q9UUE3|YNZ6_SCHPO Putative lysine N-acyltransferase C17G9.06c OS=Schizosaccharomyces pombe (strain 972 / ATCC 24843) OX=284812 GN=SPBC17G9.06c PE=3 SV=1	39.775	33.8	641200	5	42747
O42842	Adenine phosphoribosyltransferase	apt1	59.039	313	sp|O42842|APT_SCHPO Adenine phosphoribosyltransferase OS=Schizosaccharomyces pombe (strain 972 / ATCC 24843) OX=284812 GN=apt1 PE=3 SV=1	20.746	45.7	426890	5	42689
Q9C102	Putative glutamate synthase [NADPH]	glt1	323.31	1477	sp|Q9C102|GLT1_SCHPO Glutamate synthase [NADH] OS=Schizosaccharomyces pombe (strain 972 / ATCC 24843) OX=284812 GN=glt1 PE=1 SV=1	232.85	38.4	4538200	40	42413
Q9P3A7	Cell division cycle protein 48	cdc48	323.31	1517	sp|Q9P3A7|CDC48_SCHPO Cell division cycle protein 48 OS=Schizosaccharomyces pombe (strain 972 / ATCC 24843) OX=284812 GN=cdc48 PE=1 SV=2	90.124	49.3	1946300	22	42312
O74322	40S ribosomal protein S12-B	rps12b	27.134	509	sp|O74322|RS12B_SCHPO 40S ribosomal protein S12-B OS=Schizosaccharomyces pombe (strain 972 / ATCC 24843) OX=284812 GN=rps1202 PE=3 SV=1	15.871	68.2	210470	3	42094
Q9P7H0	H/ACA ribonucleoprotein complex subunit 2	nhp2	11.716	1586	sp|Q9P7H0|NHP2_SCHPO H/ACA ribonucleoprotein complex subunit nhp2 OS=Schizosaccharomyces pombe (strain 972 / ATCC 24843) OX=284812 GN=nhp2 PE=1 SV=1	17.178	55.2	209270	2	41854
P40231	Casein kinase II subunit alpha	cka1	224.76	979	sp|P40231|CSK2A_SCHPO Casein kinase II subunit alpha OS=Schizosaccharomyces pombe (strain 972 / ATCC 24843) OX=284812 GN=cka1 PE=2 SV=2	39.527	62.7	835400	10	41770
P23566	Ubiquitin-conjugating enzyme E2 2	rhp6	5.4448	915	sp|P23566|UBC2_SCHPO Ubiquitin-conjugating enzyme E2 2 OS=Schizosaccharomyces pombe (strain 972 / ATCC 24843) OX=284812 GN=rhp6 PE=1 SV=3	17.097	11.3	124040	1	41347
Q02787	Adenylosuccinate synthetase	ade2	95.212	1159	sp|Q02787|PURA_SCHPO Adenylosuccinate synthetase OS=Schizosaccharomyces pombe (strain 972 / ATCC 24843) OX=284812 GN=ade2 PE=1 SV=2	47.876	43.3	907590	8	41254
O14250	Probable proteasome subunit alpha type-6	SPAC6G10.04c	27.112	246	sp|O14250|PSA6_SCHPO Probable proteasome subunit alpha type-6 OS=Schizosaccharomyces pombe (strain 972 / ATCC 24843) OX=284812 GN=SPAC6G10.04c PE=3 SV=1	30.11	30.5	574690	3	41049
Q11004	40 kDa peptidyl-prolyl cis-trans isomerase	wis2	100.8	1418	sp|Q11004|PPID_SCHPO 40 kDa peptidyl-prolyl cis-trans isomerase OS=Schizosaccharomyces pombe (strain 972 / ATCC 24843) OX=284812 GN=wis2 PE=2 SV=1	40.161	40.2	774270	8	40751
Q92352	Actin-related protein 2/3 complex subunit 4	arc4	36.242	1446	sp|Q92352|ARPC4_SCHPO Actin-related protein 2/3 complex subunit 4 OS=Schizosaccharomyces pombe (strain 972 / ATCC 24843) OX=284812 GN=arc4 PE=1 SV=1	19.614	58.3	446170	3	40561
Q10270	Probable phosphoadenosine phosphosulfate reductase	met16	74.545	1360	sp|Q10270|MET16_SCHPO Probable phosphoadenosine phosphosulfate reductase OS=Schizosaccharomyces pombe (strain 972 / ATCC 24843) OX=284812 GN=met16 PE=3 SV=1	30.56	57.1	564440	6	40317
Q8WZJ7	C-1-tetrahydrofolate synthase, cytoplasmic;Methylenetetrahydrofolate dehydrogenase;Methenyltetrahydrofolate cyclohydrolase;Formyltetrahydrofolate synthetase	SPBC839.16	231.27	1439	sp|Q8WZJ7|C1TC_SCHPO C-1-tetrahydrofolate synthase, cytoplasmic OS=Schizosaccharomyces pombe (strain 972 / ATCC 24843) OX=284812 GN=SPBC839.16 PE=3 SV=1	101.2	39.9	2168500	19	40157
O74760	Eukaryotic translation initiation factor 3 subunit A	tif32	293.5	605	sp|O74760|EIF3A_SCHPO Eukaryotic translation initiation factor 3 subunit A OS=Schizosaccharomyces pombe (strain 972 / ATCC 24843) OX=284812 GN=tif32 PE=1 SV=1	107.07	43	2191000	25	39837
Q9UTI8	60S ribosomal protein L42	rpl42	10.725	1781	sp|Q9UTI8|RL44_SCHPO 60S ribosomal protein L42 OS=Schizosaccharomyces pombe (strain 972 / ATCC 24843) OX=284812 GN=rpl42 PE=1 SV=3	12.205	17	119240	2	39748
P78833	Uncharacterized protein C21B10.08c	SPBC21B10.08c	58.369	1076	sp|P78833|YHZ8_SCHPO Uncharacterized protein C21B10.08c OS=Schizosaccharomyces pombe (strain 972 / ATCC 24843) OX=284812 GN=SPBC21B10.08c PE=2 SV=1	21.833	59.1	475710	3	39642
O94236	Eukaryotic translation initiation factor 3 subunit D	moe1	126.22	692	sp|O94236|EIF3D_SCHPO Eukaryotic translation initiation factor 3 subunit D OS=Schizosaccharomyces pombe (strain 972 / ATCC 24843) OX=284812 GN=moe1 PE=1 SV=1	62.635	36.7	1183400	9	39447
P87313	Translation machinery-associated protein 20	tma20	34.423	1148	sp|P87313|TMA20_SCHPO Translation machinery-associated protein 20 OS=Schizosaccharomyces pombe (strain 972 / ATCC 24843) OX=284812 GN=tma20 PE=3 SV=5	20.249	34.8	392530	2	39253
Q10242	Probable gluconokinase	SPAC4G9.12	17.972	1352	sp|Q10242|GNTK_SCHPO Probable gluconokinase OS=Schizosaccharomyces pombe (strain 972 / ATCC 24843) OX=284812 GN=SPAC4G9.12 PE=3 SV=1	21.648	19.7	390550	2	39055
O94303	Imidazole glycerol phosphate synthase hisHF;Glutamine amidotransferase;Cyclase	his4	177.36	715	sp|O94303|HIS5_SCHPO Imidazole glycerol phosphate synthase hisHF OS=Schizosaccharomyces pombe (strain 972 / ATCC 24843) OX=284812 GN=his4 PE=3 SV=3	59.399	64.3	1323800	16	38936
Q09184	Curved DNA-binding protein	cdb4	97.966	1177	sp|Q09184|CDB4_SCHPO Curved DNA-binding protein OS=Schizosaccharomyces pombe (strain 972 / ATCC 24843) OX=284812 GN=cdb4 PE=1 SV=1	41.597	40.7	798520	12	38025
P28748	GTP-binding nuclear protein spi1	spi1	65.744	926	sp|P28748|SPI1_SCHPO GTP-binding nuclear protein spi1 OS=Schizosaccharomyces pombe (strain 972 / ATCC 24843) OX=284812 GN=spi1 PE=1 SV=1	24.555	30.6	340550	5	37839
O94337	Probable deoxyhypusine synthase	SPBC1271.04c	139.99	731	sp|O94337|DHYS_SCHPO Probable deoxyhypusine synthase OS=Schizosaccharomyces pombe (strain 972 / ATCC 24843) OX=284812 GN=SPBC1271.04c PE=3 SV=2	38.811	66.3	793600	7	37790
Q09173	Protein phosphatase 2C homolog 3	ptc3	131.89	1171	sp|Q09173|PP2C3_SCHPO Protein phosphatase 2C homolog 3 OS=Schizosaccharomyces pombe (strain 972 / ATCC 24843) OX=284812 GN=ptc3 PE=3 SV=1	44.856	60.1	973050	9	37425
O60086	Probable acetolactate synthase small subunit	SPBC14C8.04	130.81	465	sp|O60086|ILV6_SCHPO Probable acetolactate synthase small subunit OS=Schizosaccharomyces pombe (strain 972 / ATCC 24843) OX=284812 GN=SPBC14C8.04 PE=1 SV=2	31.834	39.4	631690	6	37158
O60060	Carbamoyl-phosphate synthase arginine-specific small chain	arg5	133.7	456	sp|O60060|CARA_SCHPO Carbamoyl-phosphate synthase arginine-specific small chain OS=Schizosaccharomyces pombe (strain 972 / ATCC 24843) OX=284812 GN=arg5 PE=3 SV=1	45.661	57.3	629930	8	37055
O94671	Probable homoserine dehydrogenase	SPBC776.03	137.94	833	sp|O94671|DHOM_SCHPO Probable homoserine dehydrogenase OS=Schizosaccharomyces pombe (strain 972 / ATCC 24843) OX=284812 GN=SPBC776.03 PE=1 SV=1	40.037	56.6	739880	8	36994
O14295	Pyridoxal reductase	plr1	125.18	258	sp|O14295|PLR1_SCHPO Pyridoxal reductase OS=Schizosaccharomyces pombe (strain 972 / ATCC 24843) OX=284812 GN=plr1 PE=1 SV=1	36.814	42.6	701260	8	36909
O42652	Aspartate aminotransferase, cytoplasmic	aat2	227.76	305	sp|O42652|AATC_SCHPO Aspartate aminotransferase, cytoplasmic OS=Schizosaccharomyces pombe (strain 972 / ATCC 24843) OX=284812 GN=aat2 PE=1 SV=1	46.14	57.9	885140	10	36881
P17609	GTP-binding protein ypt2	ypt2	102.74	899	sp|P17609|YPT2_SCHPO GTP-binding protein ypt2 OS=Schizosaccharomyces pombe (strain 972 / ATCC 24843) OX=284812 GN=ypt2 PE=3 SV=1	22.755	55	478420	6	36802
Q9Y7X5	UDP-glucose 4-epimerase uge1	uge1	127.55	1885	sp|Q9Y7X5|UGE1_SCHPO UDP-glucose 4-epimerase uge1 OS=Schizosaccharomyces pombe (strain 972 / ATCC 24843) OX=284812 GN=uge1 PE=1 SV=1	39.233	54.4	662190	12	36788
O43063	Probable proteasome subunit beta type-1	pre3	45.033	390	sp|O43063|PSB1_SCHPO Probable proteasome subunit beta type-1 OS=Schizosaccharomyces pombe (strain 972 / ATCC 24843) OX=284812 GN=pre3 PE=3 SV=1	24.564	43.8	546380	6	36425
O14217	Probable mitochondrial import receptor subunit tom70	tom70	217.03	234	sp|O14217|TOM70_SCHPO Probable mitochondrial import receptor subunit tom70 OS=Schizosaccharomyces pombe (strain 972 / ATCC 24843) OX=284812 GN=tom70 PE=1 SV=1	69.516	41.4	1259100	14	35975
O14164	Eukaryotic translation initiation factor 3 subunit C	nip1	210.46	222	sp|O14164|EIF3C_SCHPO Eukaryotic translation initiation factor 3 subunit C OS=Schizosaccharomyces pombe (strain 972 / ATCC 24843) OX=284812 GN=nip1 PE=1 SV=2	104.37	28.4	1471400	12	35889
O59771	Uridylate kinase	SPCC1795.05c	42.14	427	sp|O59771|KCY_SCHPO Uridylate kinase OS=Schizosaccharomyces pombe (strain 972 / ATCC 24843) OX=284812 GN=SPCC1795.05c PE=3 SV=1	21.716	40.8	317820	4	35314
Q9USQ9	Probable proteasome subunit beta type-7	SPBC577.10	48.103	1696	sp|Q9USQ9|PSB7_SCHPO Probable proteasome subunit beta type-7 OS=Schizosaccharomyces pombe (strain 972 / ATCC 24843) OX=284812 GN=SPBC577.10 PE=3 SV=1	29.22	43.9	419460	4	34955
Q09689	Probable eukaryotic translation initiation factor 5	SPAC2F7.05c	86.447	1193	sp|Q09689|IF5_SCHPO Probable eukaryotic translation initiation factor 5 OS=Schizosaccharomyces pombe (strain 972 / ATCC 24843) OX=284812 GN=tif5 PE=3 SV=1	44.944	20.3	698980	3	34949
O74503	Upstream activation factor subunit spp27	spp27	92.563	569	sp|O74503|UAF30_SCHPO Upstream activation factor subunit spp27 OS=Schizosaccharomyces pombe (strain 972 / ATCC 24843) OX=284812 GN=spp27 PE=1 SV=1	26.651	55.8	554130	6	34633
O59730	Methionine aminopeptidase 1	fma1	43.354	415	sp|O59730|MAP1_SCHPO Methionine aminopeptidase 1 OS=Schizosaccharomyces pombe (strain 972 / ATCC 24843) OX=284812 GN=fma1 PE=1 SV=1	42.139	33.8	723700	6	34462
Q09694	Saccharopine dehydrogenase [NAD(+), L-lysine-forming]	lys3	56.183	1195	sp|Q09694|LYS1_SCHPO Saccharopine dehydrogenase [NAD(+), L-lysine-forming] OS=Schizosaccharomyces pombe (strain 972 / ATCC 24843) OX=284812 GN=lys3 PE=1 SV=2	41.392	44.8	649440	6	34181
Q10066	Arginase	aru1	112.81	1293	sp|Q10066|ARGI2_SCHPO Arginase OS=Schizosaccharomyces pombe (strain 972 / ATCC 24843) OX=284812 GN=aru1 PE=3 SV=1	35.703	43.3	509350	6	33957
P08091	Acid phosphatase	pho1	68.605	863	sp|P08091|PPA1_SCHPO Acid phosphatase OS=Schizosaccharomyces pombe (strain 972 / ATCC 24843) OX=284812 GN=pho1 PE=2 SV=1	50.557	21.9	372130	5	33830
P15567	Phosphoribosylaminoimidazole carboxylase	ade6	292.56	895	sp|P15567|PUR6_SCHPO Phosphoribosylaminoimidazole carboxylase OS=Schizosaccharomyces pombe (strain 972 / ATCC 24843) OX=284812 GN=ade6 PE=3 SV=1	60.013	60.9	939790	13	33564
Q09826	Protein sds23/moc1	sds23	43.547	1246	sp|Q09826|SDS23_SCHPO Protein sds23/moc1 OS=Schizosaccharomyces pombe (strain 972 / ATCC 24843) OX=284812 GN=sds23 PE=1 SV=1	44.288	36.5	738330	9	33561
O74548	Probable acetylornithine aminotransferase, mitochondrial	arg1	137.48	584	sp|O74548|ARGD_SCHPO Probable acetylornithine aminotransferase, mitochondrial OS=Schizosaccharomyces pombe (strain 972 / ATCC 24843) OX=284812 GN=arg1 PE=2 SV=1	47.509	46.9	902430	10	33423
O94609	Ubiquitin-activating enzyme E1 1	ptr3	147.09	810	sp|O94609|UBA1_SCHPO Ubiquitin-activating enzyme E1 1 OS=Schizosaccharomyces pombe (strain 972 / ATCC 24843) OX=284812 GN=ptr3 PE=1 SV=1	112.95	34.6	1826000	13	33200
Q09682	Probable proteasome subunit alpha type-3		107.76	1191	sp|Q09682|PSA3_SCHPO Probable proteasome subunit alpha type-3 OS=Schizosaccharomyces pombe (strain 972 / ATCC 24843) OX=284812 GN=SPAC13C5.01c PE=3 SV=1	27.925	39.1	396190	5	33016
O42870	Phenylalanine--tRNA ligase alpha subunit	frs2	199.88	323	sp|O42870|SYFA_SCHPO Phenylalanine--tRNA ligase alpha subunit OS=Schizosaccharomyces pombe (strain 972 / ATCC 24843) OX=284812 GN=frs2 PE=3 SV=3	56.266	50.1	923020	11	32965
O74407	Aspartate--tRNA ligase, cytoplasmic	dps1	214.91	533	sp|O74407|SYDC_SCHPO Aspartate--tRNA ligase, cytoplasmic OS=Schizosaccharomyces pombe (strain 972 / ATCC 24843) OX=284812 GN=dps1 PE=1 SV=1	66.67	32.9	1051900	9	32870
O74919	RNA-binding protein rnc1	rnc1	86.427	667	sp|O74919|RNC1_SCHPO RNA-binding protein rnc1 OS=Schizosaccharomyces pombe (strain 972 / ATCC 24843) OX=284812 GN=rnc1 PE=1 SV=1	43.377	34.9	588730	7	32707
Q9UTQ1	Probable pyridoxamine 5-phosphate oxidase	SPAC1093.02	59.794	1796	sp|Q9UTQ1|PDX3_SCHPO Probable pyridoxamine 5-phosphate oxidase OS=Schizosaccharomyces pombe (strain 972 / ATCC 24843) OX=284812 GN=SPAC1093.02 PE=3 SV=1	27.014	56.7	388660	8	32389
Q9P7S7	Nucleolar protein 58	nop58	94.363	1611	sp|Q9P7S7|NOP58_SCHPO Nucleolar protein 58 OS=Schizosaccharomyces pombe (strain 972 / ATCC 24843) OX=284812 GN=nop58 PE=1 SV=1	55.758	43.7	838990	9	32269
O42846;Q9URT8	60S ribosomal protein L34-A;60S ribosomal protein L34-B	rpl34a;rpl34b	61.293	315	sp|O42846|RL34A_SCHPO 60S ribosomal protein L34-A OS=Schizosaccharomyces pombe (strain 972 / ATCC 24843) OX=284812 GN=rpl3401 PE=3 SV=1;sp|Q9URT8|RL34B_SCHPO 60S ribosomal protein L34-B OS=Schizosaccharomyces pombe (strain 972 / ATCC 24843) OX=284812 GN=rp	12.87	54.5	128390	2	32098
O59727	Protein PBDC1 homolog	SPBC3E7.07c	25.276	414	sp|O59727|YHX7_SCHPO Protein PBDC1 homolog OS=Schizosaccharomyces pombe (strain 972 / ATCC 24843) OX=284812 GN=SPBC3E7.07c PE=3 SV=1	17.405	50.3	254680	4	31835
Q9UUI5	Protein transport protein sec24	sec24	137.75	1843	sp|Q9UUI5|SEC24_SCHPO Protein transport protein sec24 OS=Schizosaccharomyces pombe (strain 972 / ATCC 24843) OX=284812 GN=sec24 PE=2 SV=1	101.9	26.5	1104500	16	31558
O94305	Putative monoglyceride lipase	SPCC5E4.05c	123.3	716	sp|O94305|MGLL_SCHPO Putative monoglyceride lipase OS=Schizosaccharomyces pombe (strain 972 / ATCC 24843) OX=284812 GN=mgl1 PE=1 SV=1	41.623	63.2	756660	9	31528
O14007	H/ACA ribonucleoprotein complex subunit 4	cbf5	95.573	169	sp|O14007|CBF5_SCHPO H/ACA ribonucleoprotein complex subunit cbf5 OS=Schizosaccharomyces pombe (strain 972 / ATCC 24843) OX=284812 GN=cbf5 PE=3 SV=1	53.11	36.3	882600	11	31522
O74894	26S protease regulatory subunit 6B homolog	rpt3	78.651	659	sp|O74894|PRS6B_SCHPO 26S proteasome regulatory subunit 6B homolog OS=Schizosaccharomyces pombe (strain 972 / ATCC 24843) OX=284812 GN=rpt3 PE=3 SV=1	43.552	45.5	723240	9	31445
Q10316	Actin-related protein 2/3 complex subunit 5	arc5	39.546	1375	sp|Q10316|ARPC5_SCHPO Actin-related protein 2/3 complex subunit 5 OS=Schizosaccharomyces pombe (strain 972 / ATCC 24843) OX=284812 GN=arc5 PE=1 SV=1	16.91	59.2	282780	4	31420
O60163	Probable aspartokinase	SPBC19F5.04	112.94	488	sp|O60163|AK_SCHPO Probable aspartokinase OS=Schizosaccharomyces pombe (strain 972 / ATCC 24843) OX=284812 GN=SPBC19F5.04 PE=1 SV=1	56.812	39.7	877060	10	31323
O94692	RuvB-like helicase 2	rvb2	105.54	839	sp|O94692|RUVB2_SCHPO RuvB-like helicase 2 OS=Schizosaccharomyces pombe (strain 972 / ATCC 24843) OX=284812 GN=rvb2 PE=1 SV=1	51.561	31.2	813650	8	31294
P40847	Switch-activating protein 1	sap1	205.01	995	sp|P40847|SAP1_SCHPO Switch-activating protein 1 OS=Schizosaccharomyces pombe (strain 972 / ATCC 24843) OX=284812 GN=sap1 PE=1 SV=2	29.127	59.4	464580	7	30972
O74781	Probable arginine--tRNA ligase, cytoplasmic	mrs1	266.93	612	sp|O74781|SYRC_SCHPO Probable arginine--tRNA ligase, cytoplasmic OS=Schizosaccharomyces pombe (strain 972 / ATCC 24843) OX=284812 GN=mrs1 PE=2 SV=1	70.689	60.2	1268200	14	30931
Q9UTQ6	40S ribosomal protein S15-B	rps15b	99.312	1798	sp|Q9UTQ6|RS15B_SCHPO 40S ribosomal protein S15-B OS=Schizosaccharomyces pombe (strain 972 / ATCC 24843) OX=284812 GN=rps1502 PE=1 SV=1	17.633	59.1	244040	3	30505
O13940	Probable low-specificity L-threonine aldolase	gly1	107.27	153	sp|O13940|GLY1_SCHPO Probable low-specificity L-threonine aldolase OS=Schizosaccharomyces pombe (strain 972 / ATCC 24843) OX=284812 GN=gly1 PE=3 SV=1	41.318	54.8	634530	8	30216
Q9USJ5	Uroporphyrinogen decarboxylase	hem12	30.869	1678	sp|Q9USJ5|DCUP_SCHPO Uroporphyrinogen decarboxylase OS=Schizosaccharomyces pombe (strain 972 / ATCC 24843) OX=284812 GN=hem12 PE=3 SV=2	40.113	28.2	451240	6	30083
Q9USZ3	Small nuclear ribonucleoprotein E	sme1	36.234	1718	sp|Q9USZ3|RUXE_SCHPO Small nuclear ribonucleoprotein E OS=Schizosaccharomyces pombe (strain 972 / ATCC 24843) OX=284812 GN=sme1 PE=1 SV=1	9.6913	58.3	119740	3	29935
Q9US38	AB hydrolase superfamily protein C1039.03	SPAC1039.03	52.606	1664	sp|Q9US38|YFZ3_SCHPO AB hydrolase superfamily protein C1039.03 OS=Schizosaccharomyces pombe (strain 972 / ATCC 24843) OX=284812 GN=SPAC1039.03 PE=3 SV=1	37.364	30.8	478920	6	29933
O14126	26S protease regulatory subunit 6A	tbp1	84.859	215	sp|O14126|PRS6A_SCHPO 26S proteasome regulatory subunit 6A OS=Schizosaccharomyces pombe (strain 972 / ATCC 24843) OX=284812 GN=tbp1 PE=3 SV=1	48.835	36.3	597690	7	29884
P78774	Actin-related protein 2/3 complex subunit 1	arc1	72.08	1059	sp|P78774|ARPC1_SCHPO Actin-related protein 2/3 complex subunit 1 OS=Schizosaccharomyces pombe (strain 972 / ATCC 24843) OX=284812 GN=arc1 PE=1 SV=3	41.596	46.4	592570	7	29629
P0CT72;P0CT71;P0CT70			90.984	881	sp|P0CT72|RL2C_SCHPO 60S ribosomal protein L2-C OS=Schizosaccharomyces pombe (strain 972 / ATCC 24843) OX=284812 GN=rpl803 PE=3 SV=1;sp|P0CT71|RL2B_SCHPO 60S ribosomal protein L2-B OS=Schizosaccharomyces pombe (strain 972 / ATCC 24843) OX=284812 GN=rpl802	27.1	37.9	351020	5	29252
Q9UT97	Probable proteasome subunit alpha type-5	pup2	69.773	1752	sp|Q9UT97|PSA5_SCHPO Probable proteasome subunit alpha type-5 OS=Schizosaccharomyces pombe (strain 972 / ATCC 24843) OX=284812 GN=pup2 PE=1 SV=1	27.573	50.6	406840	4	29060
P36614	Serine/threonine-protein phosphatase ppe1	ppe1	78.216	969	sp|P36614|PPE1_SCHPO Serine/threonine-protein phosphatase ppe1 OS=Schizosaccharomyces pombe (strain 972 / ATCC 24843) OX=284812 GN=ppe1 PE=1 SV=1	35.259	40.7	522550	6	29030
O14121	Probable NADH-ubiquinone oxidoreductase C3A11.07, mitochondrial	SPAC3A11.07	234.14	213	sp|O14121|NDH1_SCHPO Probable NADH-ubiquinone oxidoreductase C3A11.07, mitochondrial OS=Schizosaccharomyces pombe (strain 972 / ATCC 24843) OX=284812 GN=SPAC3A11.07 PE=3 SV=1	61.674	51.7	810430	13	28944
O14241	Actin-related protein 2/3 complex subunit 2	arc2	79.024	243	sp|O14241|ARPC2_SCHPO Actin-related protein 2/3 complex subunit 2 OS=Schizosaccharomyces pombe (strain 972 / ATCC 24843) OX=284812 GN=arc2 PE=1 SV=1	36.974	36.3	578330	7	28916
P31411	V-type proton ATPase subunit B	vma2	162.85	937	sp|P31411|VATB_SCHPO V-type proton ATPase subunit B OS=Schizosaccharomyces pombe (strain 972 / ATCC 24843) OX=284812 GN=vma2 PE=1 SV=2	55.841	55.1	775740	11	28731
O14104	Homoisocitrate dehydrogenase	lys12	177.23	207	sp|O14104|LYS12_SCHPO Homoisocitrate dehydrogenase OS=Schizosaccharomyces pombe (strain 972 / ATCC 24843) OX=284812 GN=lys12 PE=1 SV=1	39.256	56.1	573800	11	28690
P36603	Ribonucleoside-diphosphate reductase small chain	suc22	151.72	964	sp|P36603|RIR2_SCHPO Ribonucleoside-diphosphate reductase small chain OS=Schizosaccharomyces pombe (strain 972 / ATCC 24843) OX=284812 GN=suc22 PE=3 SV=2	45.405	37.3	688080	13	28670
P78870	Probable S-(hydroxymethyl)glutathione dehydrogenase 1	SPBC1539.07c	26.09	1078	sp|P78870|FADH1_SCHPO Probable S-(hydroxymethyl)glutathione dehydrogenase 1 OS=Schizosaccharomyces pombe (strain 972 / ATCC 24843) OX=284812 GN=SPBC1539.07c PE=2 SV=2	40.444	15.3	429830	4	28655
O94350	Cystathionine beta-lyase	str3	29.067	736	sp|O94350|CBL_SCHPO Cystathionine beta-lyase OS=Schizosaccharomyces pombe (strain 972 / ATCC 24843) OX=284812 GN=str3 PE=3 SV=4	42.773	38.2	539090	4	28373
P24487	ATP synthase subunit alpha, mitochondrial	atp1	114.3	919	sp|P24487|ATPA_SCHPO ATP synthase subunit alpha, mitochondrial OS=Schizosaccharomyces pombe (strain 972 / ATCC 24843) OX=284812 GN=atp1 PE=3 SV=1	58.587	28	821840	9	28339
P78974	Delta-aminolevulinic acid dehydratase	hem2	32.056	1094	sp|P78974|HEM2_SCHPO Delta-aminolevulinic acid dehydratase OS=Schizosaccharomyces pombe (strain 972 / ATCC 24843) OX=284812 GN=hem2 PE=2 SV=2	36.12	36.2	452560	5	28285
Q10334	Putative alanine aminotransferase	SPBC582.08	143.56	1382	sp|Q10334|ALAT_SCHPO Putative alanine aminotransferase OS=Schizosaccharomyces pombe (strain 972 / ATCC 24843) OX=284812 GN=SPBC582.08 PE=3 SV=1	56.627	42.2	643900	11	27996
O13877	DNA-directed RNA polymerases I, II, and III subunit RPABC5	rpb10	23.617	135	sp|O13877|RPAB5_SCHPO DNA-directed RNA polymerases I, II, and III subunit RPABC5 OS=Schizosaccharomyces pombe (strain 972 / ATCC 24843) OX=284812 GN=rpb10 PE=1 SV=2	8.2757	28.2	83691	1	27897
O43011	Histidine--tRNA ligase, mitochondrial	hts1	96.054	367	sp|O43011|SYH_SCHPO Histidine--tRNA ligase, mitochondrial OS=Schizosaccharomyces pombe (strain 972 / ATCC 24843) OX=284812 GN=hts1 PE=1 SV=2	63.304	31.8	890530	11	27829
O94740	Hsp90 co-chaperone Cdc37	cdc37	73.069	846	sp|O94740|CDC37_SCHPO Hsp90 co-chaperone Cdc37 OS=Schizosaccharomyces pombe (strain 972 / ATCC 24843) OX=284812 GN=cdc37 PE=1 SV=1	52.553	26.4	776290	7	27724
O74985	N-terminal acetyltransferase A complex subunit nat1	nat1	109.95	688	sp|O74985|NAT1_SCHPO N-terminal acetyltransferase A complex subunit nat1 OS=Schizosaccharomyces pombe (strain 972 / ATCC 24843) OX=284812 GN=nat1 PE=1 SV=1	83.677	31	1072600	12	27502
Q9UUJ1	Actin-related protein 2	arp2	60.348	1846	sp|Q9UUJ1|ARP2_SCHPO Actin-related protein 2 OS=Schizosaccharomyces pombe (strain 972 / ATCC 24843) OX=284812 GN=arp2 PE=1 SV=1	44.23	31.5	466860	8	27462
Q9C0X6	RuvB-like helicase 1	rvb1	119.21	1471	sp|Q9C0X6|RUVB1_SCHPO RuvB-like helicase 1 OS=Schizosaccharomyces pombe (strain 972 / ATCC 24843) OX=284812 GN=rvb1 PE=3 SV=1	50.052	43	603810	8	27446
P79081	N-acetyltransferase ats1	ats1	12.361	1101	sp|P79081|ATS1_SCHPO N-acetyltransferase ats1 OS=Schizosaccharomyces pombe (strain 972 / ATCC 24843) OX=284812 GN=ats1 PE=2 SV=1	19.149	31	218840	4	27355
Q10329	Probable proteasome subunit alpha type-4	pre6	52.832	1379	sp|Q10329|PSA4_SCHPO Probable proteasome subunit alpha type-4 OS=Schizosaccharomyces pombe (strain 972 / ATCC 24843) OX=284812 GN=pre6 PE=3 SV=1	28.277	37.1	382530	5	27323
P87167	Uba3-binding protein but2	but2	101.19	1133	sp|P87167|BUT2_SCHPO Uba3-binding protein but2 OS=Schizosaccharomyces pombe (strain 972 / ATCC 24843) OX=284812 GN=but2 PE=1 SV=1	43.625	21	539250	4	26963
Q9UUM7	Protein hob3	hob3	54.13	1851	sp|Q9UUM7|HOB3_SCHPO Protein hob3 OS=Schizosaccharomyces pombe (strain 972 / ATCC 24843) OX=284812 GN=hob3 PE=1 SV=1	30.094	39.8	536860	7	26843
Q09735	Putative aminopeptidase C13A11.05	SPAC13A11.05	131.9	1209	sp|Q09735|YA55_SCHPO Putative aminopeptidase C13A11.05 OS=Schizosaccharomyces pombe (strain 972 / ATCC 24843) OX=284812 GN=SPAC13A11.05 PE=3 SV=1	56.194	36.1	857820	11	26807
Q10137	Sec14 cytosolic factor	sec14	56.038	1309	sp|Q10137|SEC14_SCHPO Sec14 cytosolic factor OS=Schizosaccharomyces pombe (strain 972 / ATCC 24843) OX=284812 GN=sec14 PE=4 SV=1	32.746	33.9	423240	6	26453
O13687	V-type proton ATPase subunit E	vma4	19.774	73	sp|O13687|VATE_SCHPO V-type proton ATPase subunit E OS=Schizosaccharomyces pombe (strain 972 / ATCC 24843) OX=284812 GN=vma4 PE=3 SV=1	25.741	24.2	236830	2	26314
O14018	Serine--tRNA ligase, cytoplasmic	SPAC29A4.15	129.9	172	sp|O14018|SYSC_SCHPO Serine--tRNA ligase, cytoplasmic OS=Schizosaccharomyces pombe (strain 972 / ATCC 24843) OX=284812 GN=SPAC29A4.15 PE=3 SV=1	51.642	56.7	762040	14	26277
O14134	mRNA export factor elf1	elf1	168.74	217	sp|O14134|ELF1_SCHPO mRNA export factor elf1 OS=Schizosaccharomyces pombe (strain 972 / ATCC 24843) OX=284812 GN=elf1 PE=1 SV=1	116.7	43.8	1488100	25	26106
O60135	Long-chain-fatty-acid--CoA ligase 1	lcf1	294.74	481	sp|O60135|LCF1_SCHPO Long-chain-fatty-acid--CoA ligase 1 OS=Schizosaccharomyces pombe (strain 972 / ATCC 24843) OX=284812 GN=lcf1 PE=3 SV=1	75.965	42.8	699600	11	25911
O74314	Probable cystathionine gamma-synthase	SPBC15D4.09c	114.7	508	sp|O74314|MET7_SCHPO Probable cystathionine gamma-synthase OS=Schizosaccharomyces pombe (strain 972 / ATCC 24843) OX=284812 GN=SPBC15D4.09c PE=3 SV=1	68.967	26.9	697570	8	25836
O74445	Probable 26S protease subunit rpt4	rpt4	69.931	548	sp|O74445|PRS10_SCHPO Probable 26S proteasome subunit rpt4 OS=Schizosaccharomyces pombe (strain 972 / ATCC 24843) OX=284812 GN=rpt4 PE=3 SV=2	43.608	37.4	593090	8	25787
P41836	26S protease regulatory subunit 8 homolog	let1	80.827	1010	sp|P41836|PRS8_SCHPO 26S proteasome regulatory subunit 8 homolog OS=Schizosaccharomyces pombe (strain 972 / ATCC 24843) OX=284812 GN=let1 PE=3 SV=1	45.069	35.5	610280	7	25428
O74455	Probable 6-phosphogluconolactonase	SPCC16C4.10	69.646	552	sp|O74455|6PGL_SCHPO Probable 6-phosphogluconolactonase OS=Schizosaccharomyces pombe (strain 972 / ATCC 24843) OX=284812 GN=SPCC16C4.10 PE=3 SV=1	28.351	38.1	354660	7	25333
O74767	Probable coatomer subunit epsilon	sec28	101.53	609	sp|O74767|COPE_SCHPO Probable coatomer subunit epsilon OS=Schizosaccharomyces pombe (strain 972 / ATCC 24843) OX=284812 GN=sec28 PE=1 SV=1	31.774	42	328370	8	25260
O14014	Probable Rho-type GTPase-activating protein 3	rga3	4.2121	171	sp|O14014|RGA3_SCHPO Probable Rho-type GTPase-activating protein 3 OS=Schizosaccharomyces pombe (strain 972 / ATCC 24843) OX=284812 GN=rga3 PE=1 SV=1	108.65	2.9	1464800	2	25255
P39825	Profilin	cdc3	40.018	978	sp|P39825|PROF_SCHPO Profilin OS=Schizosaccharomyces pombe (strain 972 / ATCC 24843) OX=284812 GN=cdc3 PE=1 SV=1	13.411	15	100480	1	25121
P87057	Non-histone chromosomal protein 6	nhp6	9.3469	1108	sp|P87057|NHP6_SCHPO Non-histone chromosomal protein 6 OS=Schizosaccharomyces pombe (strain 972 / ATCC 24843) OX=284812 GN=nhp6 PE=3 SV=1	12.361	30.6	99833	2	24958
Q9UTJ7	Probable succinate dehydrogenase [ubiquinone] flavoprotein subunit, mitochondrial	sdh1	212.15	1784	sp|Q9UTJ7|SDHA_SCHPO Probable succinate dehydrogenase [ubiquinone] flavoprotein subunit, mitochondrial OS=Schizosaccharomyces pombe (strain 972 / ATCC 24843) OX=284812 GN=sdh1 PE=2 SV=1	70.465	45.6	841810	11	24759
O59945	Fimbrin	fim1	146.26	454	sp|O59945|FIMB_SCHPO Fimbrin OS=Schizosaccharomyces pombe (strain 972 / ATCC 24843) OX=284812 GN=fim1 PE=1 SV=1	68.617	38.9	940720	13	24756
O94582	Probable anthranilate synthase component 1	trp3	158.23	806	sp|O94582|TRPE_SCHPO Probable anthranilate synthase component 1 OS=Schizosaccharomyces pombe (strain 972 / ATCC 24843) OX=284812 GN=trp3 PE=1 SV=1	54.959	41.5	692800	10	24743
O14110	Probable aminomethyltransferase, mitochondrial	gcv1	69.507	209	sp|O14110|GCST_SCHPO Probable aminomethyltransferase, mitochondrial OS=Schizosaccharomyces pombe (strain 972 / ATCC 24843) OX=284812 GN=gcv1 PE=3 SV=1	42.408	36.4	519210	7	24724
Q9P7D7	Long-chain-fatty-acid--CoA ligase 2	lcf2	94.872	1577	sp|Q9P7D7|LCF2_SCHPO Long-chain-fatty-acid--CoA ligase 2 OS=Schizosaccharomyces pombe (strain 972 / ATCC 24843) OX=284812 GN=lcf2 PE=3 SV=1	75.79	32.5	780940	12	24404
O94552	Fumarate hydratase, mitochondrial	fum1	94.964	796	sp|O94552|FUMH_SCHPO Fumarate hydratase, mitochondrial OS=Schizosaccharomyces pombe (strain 972 / ATCC 24843) OX=284812 GN=fum1 PE=3 SV=3	56.321	30.8	585200	6	24383
P36620	Acetolactate synthase, mitochondrial	ilv1	118.69	971	sp|P36620|ILVB_SCHPO Acetolactate synthase, mitochondrial OS=Schizosaccharomyces pombe (strain 972 / ATCC 24843) OX=284812 GN=ilv1 PE=3 SV=2	73.193	38.4	924310	10	24324
Q9P7R3	Exosome complex component mtr3	mtr3	2.8798	1606	sp|Q9P7R3|MTR3_SCHPO Exosome complex component mtr3 OS=Schizosaccharomyces pombe (strain 972 / ATCC 24843) OX=284812 GN=mtr3 PE=3 SV=1	28.435	8.2	242600	1	24260
O74374	Phosphoglucomutase	SPBC32F12.10	119.95	521	sp|O74374|PGM_SCHPO Phosphoglucomutase OS=Schizosaccharomyces pombe (strain 972 / ATCC 24843) OX=284812 GN=SPBC32F12.10 PE=1 SV=1	60.598	47.8	751380	14	24238
O94246	Putative glutamate--cysteine ligase regulatory subunit	SPCC737.06c	33.367	694	sp|O94246|GSH0_SCHPO Putative glutamate--cysteine ligase regulatory subunit OS=Schizosaccharomyces pombe (strain 972 / ATCC 24843) OX=284812 GN=SPCC737.06c PE=3 SV=1	32.66	25.1	361840	3	24122
O94563	Putative uncharacterized oxidoreductase C1773.04	SPBC1773.04	29.995	799	sp|O94563|YGD4_SCHPO Putative uncharacterized oxidoreductase C1773.04 OS=Schizosaccharomyces pombe (strain 972 / ATCC 24843) OX=284812 GN=SPBC1773.04 PE=1 SV=1	37.806	38.4	433530	8	24085
P13681	Serine/threonine-protein phosphatase PP1-1	dis2	59.159	891	sp|P13681|PP11_SCHPO Serine/threonine-protein phosphatase PP1-1 OS=Schizosaccharomyces pombe (strain 972 / ATCC 24843) OX=284812 GN=dis2 PE=1 SV=1	37.636	23.2	408080	6	24004
P78890	Uncharacterized protein C23H3.15c		85.894	1081	sp|P78890|YEPF_SCHPO Uncharacterized protein C23H3.15c OS=Schizosaccharomyces pombe (strain 972 / ATCC 24843) OX=284812 GN=SPAC23H3.15c PE=2 SV=4	34.692	31.1	407480	4	23970
P56286	Eukaryotic translation initiation factor 2 subunit alpha	tif211	126.01	1047	sp|P56286|IF2A_SCHPO Eukaryotic translation initiation factor 2 subunit alpha OS=Schizosaccharomyces pombe (strain 972 / ATCC 24843) OX=284812 GN=tif211 PE=1 SV=1	34.525	48.4	476830	9	23842
O13724	Zinc finger protein zpr1	zpr1	120.31	80	sp|O13724|ZPR1_SCHPO Zinc finger protein zpr1 OS=Schizosaccharomyces pombe (strain 972 / ATCC 24843) OX=284812 GN=zpr1 PE=3 SV=1	51.376	43.1	547690	11	23813
O13902	Dihydroxyacetone kinase 1	dak1	145.38	139	sp|O13902|DAK1_SCHPO Dihydroxyacetone kinase 1 OS=Schizosaccharomyces pombe (strain 972 / ATCC 24843) OX=284812 GN=dak1 PE=3 SV=1	62.316	57.2	808650	14	23784
Q9UUC1	60S ribosomal protein L21-A	rpl21a	80.712	1822	sp|Q9UUC1|RL21A_SCHPO 60S ribosomal protein L21-A OS=Schizosaccharomyces pombe (strain 972 / ATCC 24843) OX=284812 GN=rpl2101 PE=3 SV=1	18.38	41.2	142000	3	23666
Q9P7T6	UPF0160 protein C694.04c	SPAC694.04c	81.281	1613	sp|Q9P7T6|YIW4_SCHPO MYG1 protein C694.04c OS=Schizosaccharomyces pombe (strain 972 / ATCC 24843) OX=284812 GN=SPAC694.04c PE=3 SV=1	36.672	40.1	472960	8	23648
O60102	Translation initiation factor rli1	rli1	49.89	470	sp|O60102|RLI1_SCHPO Translation initiation factor rli1 OS=Schizosaccharomyces pombe (strain 972 / ATCC 24843) OX=284812 GN=rli1 PE=3 SV=1	66.589	27	756180	8	23631
Q09692	Tryptophan--tRNA ligase, cytoplasmic	wrs1	72.113	1194	sp|Q09692|SYWC_SCHPO Tryptophan--tRNA ligase, cytoplasmic OS=Schizosaccharomyces pombe (strain 972 / ATCC 24843) OX=284812 GN=wrs1 PE=1 SV=1	44.91	34.7	589910	6	23597
Q9USG6	60S ribosomal protein L33-B	rpl33b	19.986	1670	sp|Q9USG6|RL33B_SCHPO 60S ribosomal protein L33-B OS=Schizosaccharomyces pombe (strain 972 / ATCC 24843) OX=284812 GN=rpl35a PE=1 SV=1	12.108	36.1	211750	5	23528
Q09912	Protein psi1	psi1	85.497	1278	sp|Q09912|PSI1_SCHPO Protein psi1 OS=Schizosaccharomyces pombe (strain 972 / ATCC 24843) OX=284812 GN=psi1 PE=2 SV=2	40.259	31.9	422460	6	23470
O14280	Uncharacterized bolA-like protein C8C9.11	SPAC8C9.11	9.8021	253	sp|O14280|YETB_SCHPO Uncharacterized bolA-like protein C8C9.11 OS=Schizosaccharomyces pombe (strain 972 / ATCC 24843) OX=284812 GN=SPAC8C9.11 PE=3 SV=2	9.5279	16.7	46901	1	23451
P87173	U6 snRNA-associated Sm-like protein LSm1	lsm1	20.037	1136	sp|P87173|LSM1_SCHPO U6 snRNA-associated Sm-like protein LSm1 OS=Schizosaccharomyces pombe (strain 972 / ATCC 24843) OX=284812 GN=lsm1 PE=1 SV=1	16.171	37.9	139290	3	23216
P40976	L-aminoadipate-semialdehyde dehydrogenase	lys1	311.87	1002	sp|P40976|LYS2_SCHPO L-2-aminoadipate reductase OS=Schizosaccharomyces pombe (strain 972 / ATCC 24843) OX=284812 GN=lys1 PE=1 SV=3	156.89	37.4	1740700	21	23210
O13718	Vacuolar transporter chaperone 2	vtc2	108.18	79	sp|O13718|VTC2_SCHPO Vacuolar transporter chaperone 2 OS=Schizosaccharomyces pombe (strain 972 / ATCC 24843) OX=284812 GN=vtc2 PE=1 SV=1	85.444	28.9	948400	12	23132
Q10193	Pre-mRNA-splicing factor srp1	srp1	53.348	1335	sp|Q10193|SRP1_SCHPO Pre-mRNA-splicing factor srp1 OS=Schizosaccharomyces pombe (strain 972 / ATCC 24843) OX=284812 GN=srp1 PE=1 SV=3	31.068	20.4	276660	3	23055
Q01112	Cell division control protein 42 homolog	cdc42	15.377	1152	sp|Q01112|CDC42_SCHPO Cell division control protein 42 homolog OS=Schizosaccharomyces pombe (strain 972 / ATCC 24843) OX=284812 GN=cdc42 PE=1 SV=1	21.329	16.1	181480	2	22685
Q9UUA1	Oxysterol-binding protein homolog C23B6.01c	SPCC23B6.01c	123.73	1816	sp|Q9UUA1|YJX1_SCHPO Oxysterol-binding protein homolog C23B6.01c OS=Schizosaccharomyces pombe (strain 972 / ATCC 24843) OX=284812 GN=SPCC23B6.01c PE=1 SV=2	54.647	32.4	724790	6	22650
O13648	Ribosomal protein arginine N-methyltransferase rmt3	rmt3	57.105	65	sp|O13648|ANM3_SCHPO Ribosomal protein arginine N-methyltransferase rmt3 OS=Schizosaccharomyces pombe (strain 972 / ATCC 24843) OX=284812 GN=rmt3 PE=1 SV=3	61.76	22.5	495100	9	22505
O59736	2-isopropylmalate synthase	leu3	132.96	418	sp|O59736|LEU1_SCHPO 2-isopropylmalate synthase OS=Schizosaccharomyces pombe (strain 972 / ATCC 24843) OX=284812 GN=leu3 PE=3 SV=2	64.041	35.1	650770	8	22440
P50515	V-type proton ATPase 16 kDa proteolipid subunit	vma3	3.2887	1029	sp|P50515|VATL_SCHPO V-type proton ATPase 16 kDa proteolipid subunit OS=Schizosaccharomyces pombe (strain 972 / ATCC 24843) OX=284812 GN=vma3 PE=3 SV=1	16.325	11.2	112150	1	22430
O59810	Vigilin 1	vgl1	151.42	438	sp|O59810|VGL1_SCHPO Vigilin 1 OS=Schizosaccharomyces pombe (strain 972 / ATCC 24843) OX=284812 GN=vgl1 PE=1 SV=2	142.61	29.9	1561200	24	22302
Q9P7S3	SWI/SNF and RSC complexes subunit ssr3	ssr3	9.1617	1609	sp|Q9P7S3|SSR3_SCHPO SWI/SNF and RSC complexes subunit ssr3 OS=Schizosaccharomyces pombe (strain 972 / ATCC 24843) OX=284812 GN=ssr3 PE=1 SV=1	49.759	14.8	616230	1	22008
P55877	Eukaryotic translation initiation factor 1A	tif11	53.423	1046	sp|P55877|IF1A_SCHPO Eukaryotic translation initiation factor 1A OS=Schizosaccharomyces pombe (strain 972 / ATCC 24843) OX=284812 GN=tif11 PE=2 SV=2	15.677	49.3	153720	4	21960
O13848	NAD/NADP-dependent indole-3-acetaldehyde reductase	SPAC19G12.09	54.623	123	sp|O13848|I3ACR_SCHPO NAD/NADP-dependent indole-3-acetaldehyde reductase OS=Schizosaccharomyces pombe (strain 972 / ATCC 24843) OX=284812 GN=SPAC19G12.09 PE=1 SV=1	31.569	44	395180	5	21955
P41831	Ribose-phosphate pyrophosphokinase 1	SPAC4A8.14	66.434	1009	sp|P41831|KPR1_SCHPO Ribose-phosphate pyrophosphokinase 1 OS=Schizosaccharomyces pombe (strain 972 / ATCC 24843) OX=284812 GN=SPAC4A8.14 PE=3 SV=1	45.352	38.9	350070	6	21879
Q9Y7L8	40S ribosomal protein S0-A	rps0a	55.27	1866	sp|Q9Y7L8|RSSA1_SCHPO 40S ribosomal protein S0-A OS=Schizosaccharomyces pombe (strain 972 / ATCC 24843) OX=284812 GN=rps001 PE=1 SV=1	31.759	38.7	261710	3	21809
O74448	Peptidyl-prolyl cis-trans isomerase pin1	pin1	27.468	549	sp|O74448|PIN1_SCHPO Peptidyl-prolyl cis-trans isomerase pin1 OS=Schizosaccharomyces pombe (strain 972 / ATCC 24843) OX=284812 GN=pin1 PE=4 SV=1	19.773	40.6	215470	3	21547
Q8WZK3	Dual specificity phosphatase ibp1	ibp1	19.96	1441	sp|Q8WZK3|IBP1_SCHPO Dual specificity phosphatase ibp1 OS=Schizosaccharomyces pombe (strain 972 / ATCC 24843) OX=284812 GN=ibp1 PE=1 SV=1	15.778	39.1	171800	3	21475
Q9Y7U7	Staphylococcal nuclease domain-containing protein 1	snd1	100.98	1883	sp|Q9Y7U7|SND1_SCHPO Staphylococcal nuclease domain-containing protein 1 OS=Schizosaccharomyces pombe (strain 972 / ATCC 24843) OX=284812 GN=snd1 PE=1 SV=1	98.16	32.3	858480	12	21462
Q09177	DNA-directed RNA polymerases I and III subunit RPAC2	rpc19	23.799	1174	sp|Q09177|RPAC2_SCHPO DNA-directed RNA polymerases I and III subunit RPAC2 OS=Schizosaccharomyces pombe (strain 972 / ATCC 24843) OX=284812 GN=rpc19 PE=1 SV=1	13.721	51.2	171470	4	21433
P87308	Protein lsb5	lsb5	66.911	1147	sp|P87308|LSB5_SCHPO Protein lsb5 OS=Schizosaccharomyces pombe (strain 972 / ATCC 24843) OX=284812 GN=lsb5 PE=3 SV=1	34.195	50.3	362710	5	21336
Q09736	Lanosterol 14-alpha demethylase erg11	erg11	203.95	1210	sp|Q09736|CP51_SCHPO Lanosterol 14-alpha demethylase erg11 OS=Schizosaccharomyces pombe (strain 972 / ATCC 24843) OX=284812 GN=erg11 PE=1 SV=1	56.331	49.7	463510	10	21069
O14055	Tyrosine--tRNA ligase, cytoplasmic	tys1	83.403	188	sp|O14055|SYYC_SCHPO Tyrosine--tRNA ligase, cytoplasmic OS=Schizosaccharomyces pombe (strain 972 / ATCC 24843) OX=284812 GN=tys1 PE=3 SV=1	44.575	51.1	547320	6	21051
O13774	GTP cyclohydrolase 1	SPAC17A5.13	101.78	93	sp|O13774|GCH1_SCHPO GTP cyclohydrolase 1 OS=Schizosaccharomyces pombe (strain 972 / ATCC 24843) OX=284812 GN=SPAC17A5.13 PE=1 SV=1	26.492	46.8	273150	4	21012
Q8NIL3	Antisense-enhancing sequence 1	aes1	49.213	1434	sp|Q8NIL3|AES1_SCHPO Antisense-enhancing sequence 1 OS=Schizosaccharomyces pombe (strain 972 / ATCC 24843) OX=284812 GN=aes1 PE=3 SV=1	32.228	42.6	293920	6	20994
Q9P7T8	Uncharacterized helicase C694.02	SPAC694.02	233.57	1614	sp|Q9P7T8|YIW2_SCHPO Uncharacterized helicase C694.02 OS=Schizosaccharomyces pombe (strain 972 / ATCC 24843) OX=284812 GN=SPAC694.02 PE=3 SV=1	195.06	21.3	1591100	21	20936
O60100	Probable importin subunit beta-4	kap123	152.63	468	sp|O60100|IMB4_SCHPO Probable importin subunit beta-4 OS=Schizosaccharomyces pombe (strain 972 / ATCC 24843) OX=284812 GN=kap123 PE=3 SV=1	117.83	22	1124400	12	20823
O59770	Probable proteasome subunit alpha type-7	pre10	14.276	426	sp|O59770|PSA7_SCHPO Probable proteasome subunit alpha type-7 OS=Schizosaccharomyces pombe (strain 972 / ATCC 24843) OX=284812 GN=pre10 PE=1 SV=1	28.031	21.3	227740	3	20703
P78854	Lysophospholipase 1	plb1	103.4	1077	sp|P78854|PLB1_SCHPO Lysophospholipase 1 OS=Schizosaccharomyces pombe (strain 972 / ATCC 24843) OX=284812 GN=plb1 PE=2 SV=2	67.118	28.1	350630	4	20625
P36612	26S protease regulatory subunit 4 homolog	mts2	89.126	968	sp|P36612|PRS4_SCHPO 26S proteasome regulatory subunit 4 homolog OS=Schizosaccharomyces pombe (strain 972 / ATCC 24843) OX=284812 GN=mts2 PE=2 SV=1	50.06	34.4	512670	6	20507
P20772	Bifunctional purine biosynthetic protein ADE1;Phosphoribosylamine--glycine ligase;Phosphoribosylformylglycinamidine cyclo-ligase	ade1	156.9	906	sp|P20772|PUR2_SCHPO Bifunctional purine biosynthetic protein ADE1 OS=Schizosaccharomyces pombe (strain 972 / ATCC 24843) OX=284812 GN=ade1 PE=3 SV=1	85.23	53.6	878480	13	20430
Q10318	Putative dihydroxy-acid dehydratase, mitochondrial	SPAC17G8.06c	104.18	1376	sp|Q10318|ILV3_SCHPO Dihydroxy-acid dehydratase, mitochondrial OS=Schizosaccharomyces pombe (strain 972 / ATCC 24843) OX=284812 GN=SPAC17G8.06c PE=2 SV=1	63.926	29.8	612530	8	20418
Q09723	Multifunctional methyltransferase subunit trm112	trm112	33.275	1205	sp|Q09723|TR112_SCHPO Multifunctional methyltransferase subunit trm112 OS=Schizosaccharomyces pombe (strain 972 / ATCC 24843) OX=284812 GN=trm112 PE=3 SV=1	14.075	62.7	182830	4	20314
Q9UUK7	Phosphoribosylglycinamide formyltransferase	ade5	22.741	1850	sp|Q9UUK7|PUR3_SCHPO Phosphoribosylglycinamide formyltransferase OS=Schizosaccharomyces pombe (strain 972 / ATCC 24843) OX=284812 GN=ade5 PE=2 SV=1	22.252	41.1	243640	3	20303
Q9USX1	Aminopeptidase 1	ape1	184.27	1712	sp|Q9USX1|APE1_SCHPO Aminopeptidase 1 OS=Schizosaccharomyces pombe (strain 972 / ATCC 24843) OX=284812 GN=ape1 PE=3 SV=1	99.445	41.7	1034500	16	20284
O13966	Aconitate hydratase, mitochondrial	SPAC24C9.06c	198.11	160	sp|O13966|ACON_SCHPO Aconitate hydratase, mitochondrial OS=Schizosaccharomyces pombe (strain 972 / ATCC 24843) OX=284812 GN=SPAC24C9.06c PE=3 SV=2	86.112	33.2	668760	10	20266
O94579	Probable proteasome subunit alpha type-2	pre8	44.476	804	sp|O94579|PSA2_SCHPO Probable proteasome subunit alpha type-2 OS=Schizosaccharomyces pombe (strain 972 / ATCC 24843) OX=284812 GN=pre8 PE=3 SV=1	26.404	48.2	280570	5	20041
O94399	Twinfilin	twf1	85.397	752	sp|O94399|TWF1_SCHPO Twinfilin OS=Schizosaccharomyces pombe (strain 972 / ATCC 24843) OX=284812 GN=twf1 PE=1 SV=1	36.78	24.4	417780	6	19894
P79063	Eukaryotic peptide chain release factor subunit 1	sup45	46.668	1099	sp|P79063|ERF1_SCHPO Eukaryotic peptide chain release factor subunit 1 OS=Schizosaccharomyces pombe (strain 972 / ATCC 24843) OX=284812 GN=sup45 PE=1 SV=1	48.803	24.2	475710	5	19821
Q9UTT1	Ubiquitin carboxyl-terminal hydrolase 21	ubp21	115.11	1804	sp|Q9UTT1|UBP21_SCHPO Ubiquitin carboxyl-terminal hydrolase 21 OS=Schizosaccharomyces pombe (strain 972 / ATCC 24843) OX=284812 GN=ubp21 PE=3 SV=2	130.83	30.5	1157900	18	19626
O14254	Probable isocitrate dehydrogenase [NADP], mitochondrial	idp1	227.02	248	sp|O14254|IDHP_SCHPO Probable isocitrate dehydrogenase [NADP], mitochondrial OS=Schizosaccharomyces pombe (strain 972 / ATCC 24843) OX=284812 GN=idp1 PE=3 SV=2	49.478	54.2	488610	11	19544
P87048	26S proteasome regulatory subunit rpn1	rpn1	148.05	1106	sp|P87048|RPN1_SCHPO 26S proteasome regulatory subunit rpn1 OS=Schizosaccharomyces pombe (strain 972 / ATCC 24843) OX=284812 GN=rpn1 PE=1 SV=2	97.998	36.3	955470	17	19499
P87242	HD domain-containing protein C4G3.17	SPCC4G3.17	37.377	1146	sp|P87242|HDD1_SCHPO 5-deoxynucleotidase hdd1 OS=Schizosaccharomyces pombe (strain 972 / ATCC 24843) OX=284812 GN=hdd1 PE=3 SV=1	22.929	51.5	233010	5	19418
P0CU18;P0CU17			81.28	887	sp|P0CU18|RPN52_SCHPO 26S proteasome regulatory subunit rpn502 OS=Schizosaccharomyces pombe (strain 972 / ATCC 24843) OX=284812 GN=rpn502 PE=1 SV=1;sp|P0CU17|RPN51_SCHPO 26S proteasome regulatory subunit rpn501 OS=Schizosaccharomyces pombe (strain 972 / AT	51.618	41.3	522730	10	19360
O94700	Multiprotein-bridging factor 1	mbf1	39.457	841	sp|O94700|MBF1_SCHPO Multiprotein-bridging factor 1 OS=Schizosaccharomyces pombe (strain 972 / ATCC 24843) OX=284812 GN=mbf1 PE=3 SV=1	15.979	27.7	173070	3	19230
O43026	Glyceraldehyde-3-phosphate dehydrogenase 2	gpd3	32.853	372	sp|O43026|G3P2_SCHPO Glyceraldehyde-3-phosphate dehydrogenase 2 OS=Schizosaccharomyces pombe (strain 972 / ATCC 24843) OX=284812 GN=gpd3 PE=1 SV=1	35.674	60	398810	13	18991
Q09745	Uncharacterized protein C12C2.04	SPBC12C2.04	51.609	1214	sp|Q09745|YB64_SCHPO Uncharacterized protein C12C2.04 OS=Schizosaccharomyces pombe (strain 972 / ATCC 24843) OX=284812 GN=SPBC12C2.04 PE=4 SV=1	43.031	35.9	321450	5	18909
Q96WV5	Putative coatomer subunit alpha	SPBPJ4664.04	236.94	1462	sp|Q96WV5|COPA_SCHPO Putative coatomer subunit alpha OS=Schizosaccharomyces pombe (strain 972 / ATCC 24843) OX=284812 GN=SPBPJ4664.04 PE=1 SV=1	136.37	38	1285200	21	18900
Q10166	Hydrolase C26A3.11	SPAC26A3.11	78.386	1321	sp|Q10166|YAUB_SCHPO Hydrolase C26A3.11 OS=Schizosaccharomyces pombe (strain 972 / ATCC 24843) OX=284812 GN=SPAC26A3.11 PE=3 SV=1	35.679	31.4	337140	4	18730
O94444	26S proteasome regulatory subunit rpn10	rpn10	40.781	769	sp|O94444|RPN10_SCHPO 26S proteasome regulatory subunit rpn10 OS=Schizosaccharomyces pombe (strain 972 / ATCC 24843) OX=284812 GN=rpn10 PE=1 SV=1	27.14	17.3	149400	3	18675
Q09130	Eukaryotic translation initiation factor 2 subunit gamma	tif213	130.02	1166	sp|Q09130|IF2G_SCHPO Eukaryotic translation initiation factor 2 subunit gamma OS=Schizosaccharomyces pombe (strain 972 / ATCC 24843) OX=284812 GN=tif213 PE=2 SV=1	48.78	31.2	391570	4	18646
O74419	Uncharacterized protein C162.02c	SPCC162.02c	116.43	538	sp|O74419|YQ52_SCHPO Uncharacterized protein C162.02c OS=Schizosaccharomyces pombe (strain 972 / ATCC 24843) OX=284812 GN=SPCC162.02c PE=2 SV=1	109.85	26.7	1080800	15	18634
P40235	Casein kinase I homolog hhp1	hhp1	40.499	982	sp|P40235|HHP1_SCHPO Casein kinase I homolog hhp1 OS=Schizosaccharomyces pombe (strain 972 / ATCC 24843) OX=284812 GN=hhp1 PE=2 SV=1	42.45	24.9	353660	6	18614
P00046	Cytochrome c	cyc1	49.597	848	sp|P00046|CYC_SCHPO Cytochrome c OS=Schizosaccharomyces pombe (strain 972 / ATCC 24843) OX=284812 GN=cyc1 PE=1 SV=3	12.021	33.9	129740	2	18535
O60180	Probable metalloprotease arx1	arx1	49.035	493	sp|O60180|ARX1_SCHPO Probable metalloprotease arx1 OS=Schizosaccharomyces pombe (strain 972 / ATCC 24843) OX=284812 GN=arx1 PE=3 SV=1	45.672	30.7	369510	5	18475
Q9P786	Methylenetetrahydrofolate dehydrogenase [NAD(+)]	mtd1	36.315	1567	sp|Q9P786|MTD1_SCHPO Methylenetetrahydrofolate dehydrogenase [NAD(+)] OS=Schizosaccharomyces pombe (strain 972 / ATCC 24843) OX=284812 GN=mtd1 PE=3 SV=1	35.814	26.2	405360	5	18426
Q9UQX0	Superoxide dismutase [Mn], mitochondrial	sod2	19.934	1633	sp|Q9UQX0|SODM_SCHPO Superoxide dismutase [Mn], mitochondrial OS=Schizosaccharomyces pombe (strain 972 / ATCC 24843) OX=284812 GN=sod2 PE=1 SV=1	24.346	37.6	202690	4	18426
Q92373	Replication factor A protein 2	ssb2	29.868	1455	sp|Q92373|RFA2_SCHPO Replication factor A protein 2 OS=Schizosaccharomyces pombe (strain 972 / ATCC 24843) OX=284812 GN=ssb2 PE=1 SV=1	30.39	25.4	165540	3	18394
P40232	Casein kinase II subunit beta	ckb1	71.219	980	sp|P40232|CSK2B_SCHPO Casein kinase II subunit beta OS=Schizosaccharomyces pombe (strain 972 / ATCC 24843) OX=284812 GN=ckb1 PE=2 SV=2	26.677	61.5	183660	4	18366
Q9UT56	40S ribosomal protein S26-A	rps26a	14.695	1743	sp|Q9UT56|RS26A_SCHPO 40S ribosomal protein S26-A OS=Schizosaccharomyces pombe (strain 972 / ATCC 24843) OX=284812 GN=rps2601 PE=3 SV=1	13.876	22.5	73331	2	18333
O42851	Uncharacterized trans-sulfuration enzyme C23A1.14c	SPAC23A1.14c	47.48	318	sp|O42851|YFHE_SCHPO Uncharacterized trans-sulfuration enzyme C23A1.14c OS=Schizosaccharomyces pombe (strain 972 / ATCC 24843) OX=284812 GN=SPAC23A1.14c PE=2 SV=1	43.284	21.4	255360	4	18240
Q09780	Putative mevalonate kinase	erg12	29.859	1229	sp|Q09780|KIME_SCHPO Putative mevalonate kinase OS=Schizosaccharomyces pombe (strain 972 / ATCC 24843) OX=284812 GN=erg12 PE=2 SV=1	43.406	28.7	218690	5	18224
Q09817	60S ribosomal export protein nmd3	nmd3	84.305	1245	sp|Q09817|NMD3_SCHPO 60S ribosomal export protein nmd3 OS=Schizosaccharomyces pombe (strain 972 / ATCC 24843) OX=284812 GN=nmd3 PE=3 SV=1	56.55	28.7	411610	7	17896
Q9UUI7	Putative alpha,alpha-trehalose-phosphate synthase [UDP-forming] 100 kDa subunit	SPAC22F8.05	95.971	1844	sp|Q9UUI7|TPSY_SCHPO Putative alpha,alpha-trehalose-phosphate synthase [UDP-forming] 100 kDa subunit OS=Schizosaccharomyces pombe (strain 972 / ATCC 24843) OX=284812 GN=SPAC22F8.05 PE=1 SV=1	100.66	23	695110	10	17823
O94497	Uncharacterized serine-rich protein C18E5.07	SPBC18E5.07	48.119	778	sp|O94497|YBS7_SCHPO Uncharacterized serine-rich protein C18E5.07 OS=Schizosaccharomyces pombe (strain 972 / ATCC 24843) OX=284812 GN=SPBC18E5.07 PE=1 SV=1	65.328	38.2	514760	6	17750
Q9P7B4	Uncharacterized oxidoreductase C521.03	SPAC521.03	33.728	1571	sp|Q9P7B4|YI13_SCHPO NADP-dependent 3-hydroxy acid dehydrogenase OS=Schizosaccharomyces pombe (strain 972 / ATCC 24843) OX=284812 GN=SPAC521.03 PE=1 SV=1	28.148	34.7	265830	4	17722
Q9HEQ9	Single-stranded TG1-3 DNA-binding protein	tcg1	8.1154	1497	sp|Q9HEQ9|TCG1_SCHPO Single-stranded TG1-3 DNA-binding protein OS=Schizosaccharomyces pombe (strain 972 / ATCC 24843) OX=284812 GN=tcg1 PE=1 SV=3	38.002	9.5	282420	3	17651
Q9HGM9	DnaJ homolog subfamily C member 7 homolog	SPBC543.02c	57.377	1509	sp|Q9HGM9|DNJC7_SCHPO DnaJ homolog subfamily C member 7 homolog OS=Schizosaccharomyces pombe (strain 972 / ATCC 24843) OX=284812 GN=SPBC543.02c PE=4 SV=1	53.304	30.7	422660	6	17611
P30655	Probable proteasome subunit beta type-5	pts1	40.565	930	sp|P30655|PSB5_SCHPO Probable proteasome subunit beta type-5 OS=Schizosaccharomyces pombe (strain 972 / ATCC 24843) OX=284812 GN=pts1 PE=3 SV=3	29.986	27.6	275800	5	17237
O42661	Small nuclear ribonucleoprotein Sm D1	smd1	3.3812	306	sp|O42661|SMD1_SCHPO Small nuclear ribonucleoprotein Sm D1 OS=Schizosaccharomyces pombe (strain 972 / ATCC 24843) OX=284812 GN=smd1 PE=1 SV=1	13.089	18.8	68785	1	17196
Q9P4X4	Probable vesicular-fusion protein sec17 homolog	sec17	15.379	1526	sp|Q9P4X4|SEC17_SCHPO Probable vesicular-fusion protein sec17 homolog OS=Schizosaccharomyces pombe (strain 972 / ATCC 24843) OX=284812 GN=sec17 PE=1 SV=1	32.222	40.1	271500	4	16968
O94513	Eukaryotic translation initiation factor 3 subunit E	int6	77.046	784	sp|O94513|EIF3E_SCHPO Eukaryotic translation initiation factor 3 subunit E OS=Schizosaccharomyces pombe (strain 972 / ATCC 24843) OX=284812 GN=int6 PE=1 SV=1	57.114	26.3	305200	5	16955
Q9USZ6	Ribosome assembly factor mrt4	mrt4	18.658	1720	sp|Q9USZ6|MRT4_SCHPO Ribosome assembly factor mrt4 OS=Schizosaccharomyces pombe (strain 972 / ATCC 24843) OX=284812 GN=mrt4 PE=3 SV=1	26.663	31.1	203360	3	16947
O74873	Protein transport protein sec23-1	sec231	85.529	647	sp|O74873|SC231_SCHPO Protein transport protein sec23-1 OS=Schizosaccharomyces pombe (strain 972 / ATCC 24843) OX=284812 GN=sec231 PE=3 SV=1	84.844	20.9	541800	8	16931
O94601	Uncharacterized protein C622.14	SPCC622.14	107.71	809	sp|O94601|YC8E_SCHPO Uncharacterized protein C622.14 OS=Schizosaccharomyces pombe (strain 972 / ATCC 24843) OX=284812 GN=SPCC622.14 PE=4 SV=2	35.518	25.5	304610	3	16923
O94547	Serine/threonine-protein kinase srk1	srk1	42.291	793	sp|O94547|SRK1_SCHPO Serine/threonine-protein kinase srk1 OS=Schizosaccharomyces pombe (strain 972 / ATCC 24843) OX=284812 GN=srk1 PE=1 SV=1	66.135	22.2	486490	8	16775
O94331	Orotate phosphoribosyltransferase	ura5	46.332	729	sp|O94331|PYRE_SCHPO Orotate phosphoribosyltransferase OS=Schizosaccharomyces pombe (strain 972 / ATCC 24843) OX=284812 GN=ura5 PE=3 SV=1	23.716	38.6	183390	3	16672
P05767	60S ribosomal protein L39	rpl39	3.6642	859	sp|P05767|RL39_SCHPO 60S ribosomal protein L39 OS=Schizosaccharomyces pombe (strain 972 / ATCC 24843) OX=284812 GN=rpl39 PE=3 SV=3	6.3084	19.6	33336	1	16668
P0CT53			34.085	872	sp|P0CT53|EF1A1_SCHPO Elongation factor 1-alpha-A OS=Schizosaccharomyces pombe (strain 972 / ATCC 24843) OX=284812 GN=tef101 PE=1 SV=1	49.66	83	400020	37	16667
Q09923	Aldo-keto reductase yakc [NADP(+)]	yakc	24.822	1285	sp|Q09923|YAKC_SCHPO Aldo-keto reductase yakc [NADP(+)] OS=Schizosaccharomyces pombe (strain 972 / ATCC 24843) OX=284812 GN=yakc PE=1 SV=1	37.71	26.2	283230	4	16661
O74628	Uncharacterized oxidoreductase C162.03	SPCC162.03	45.272	592	sp|O74628|YQ53_SCHPO Uncharacterized oxidoreductase C162.03 OS=Schizosaccharomyces pombe (strain 972 / ATCC 24843) OX=284812 GN=SPCC162.03 PE=3 SV=1	32.614	29.1	277570	4	16327
O74965	Eukaryotic translation initiation factor 2A	SPBC4B4.04	86.871	681	sp|O74965|EIF2A_SCHPO Eukaryotic translation initiation factor 2A OS=Schizosaccharomyces pombe (strain 972 / ATCC 24843) OX=284812 GN=SPBC4B4.04 PE=1 SV=1	63.496	25.5	487260	6	16242
Q09845	Glycerol-3-phosphate dehydrogenase [NAD(+)] 2	gpd2	73.465	1252	sp|Q09845|GPD2_SCHPO Glycerol-3-phosphate dehydrogenase [NAD(+)] 2 OS=Schizosaccharomyces pombe (strain 972 / ATCC 24843) OX=284812 GN=gpd2 PE=1 SV=1	40.874	41.3	350920	8	15951
Q09860	Probable cysteine--tRNA ligase		95.437	1258	sp|Q09860|SYC_SCHPO Probable cysteine--tRNA ligase OS=Schizosaccharomyces pombe (strain 972 / ATCC 24843) OX=284812 GN=SPAC29E6.06c PE=3 SV=1	85.554	26.4	540570	9	15899
Q9USJ7	Negative regulator of ofd1	nro1	94.466	1679	sp|Q9USJ7|ETT1_SCHPO Negative regulator of ofd1 OS=Schizosaccharomyces pombe (strain 972 / ATCC 24843) OX=284812 GN=nro1 PE=1 SV=1	44.449	34.4	222460	5	15890
O74830	Putative glutathione S-transferase C1183.02	SPCC1183.02	29.603	630	sp|O74830|YC12_SCHPO Putative glutathione S-transferase C1183.02 OS=Schizosaccharomyces pombe (strain 972 / ATCC 24843) OX=284812 GN=SPCC1183.02 PE=3 SV=1	25.503	37.7	252280	3	15768
P55306	Catalase	cta1	57.654	1045	sp|P55306|CATA_SCHPO Catalase OS=Schizosaccharomyces pombe (strain 972 / ATCC 24843) OX=284812 GN=cta1 PE=1 SV=1	58.279	20.3	438780	7	15671
P78875	Trehalose-phosphatase	tpp1	100.85	1080	sp|P78875|TPP1_SCHPO Trehalose-phosphatase OS=Schizosaccharomyces pombe (strain 972 / ATCC 24843) OX=284812 GN=tpp1 PE=1 SV=2	93.876	30.1	626080	12	15652
O60162	Uncharacterized protein C19F5.03	SPBC19F5.03	59.74	487	sp|O60162|YG23_SCHPO Uncharacterized protein C19F5.03 OS=Schizosaccharomyces pombe (strain 972 / ATCC 24843) OX=284812 GN=SPBC19F5.03 PE=1 SV=1	68.712	30.8	484120	8	15617
O14363	60S ribosomal protein L1-A	rpl1a	8.3727	283	sp|O14363|RL1A_SCHPO 60S ribosomal protein L1-A OS=Schizosaccharomyces pombe (strain 972 / ATCC 24843) OX=284812 GN=rpl102 PE=1 SV=1	23.884	33.3	140360	5	15595
Q01663	AP-1-like transcription factor	pap1	2.2521	1154	sp|Q01663|AP1_SCHPO AP-1-like transcription factor OS=Schizosaccharomyces pombe (strain 972 / ATCC 24843) OX=284812 GN=pap1 PE=1 SV=2	61.531	2.5	354970	1	15433
O13820	Cytochrome P450 61	erg5	67.999	113	sp|O13820|ERG5_SCHPO Cytochrome P450 61 OS=Schizosaccharomyces pombe (strain 972 / ATCC 24843) OX=284812 GN=erg5 PE=1 SV=3	62.27	42.2	477040	9	15388
O13923	Coronin-like protein crn1	crn1	107.2	147	sp|O13923|CORO_SCHPO Coronin-like protein crn1 OS=Schizosaccharomyces pombe (strain 972 / ATCC 24843) OX=284812 GN=crn1 PE=1 SV=1	67.015	31.1	491270	10	15352
P78965	Glutathione reductase	pgr1	37.344	1092	sp|P78965|GSHR_SCHPO Glutathione reductase OS=Schizosaccharomyces pombe (strain 972 / ATCC 24843) OX=284812 GN=pgr1 PE=3 SV=2	49.999	22.2	259770	5	15281
Q09783	Mitochondrial import inner membrane translocase subunit tim8	tim8	7.9912	1231	sp|Q09783|TIM8_SCHPO Mitochondrial import inner membrane translocase subunit tim8 OS=Schizosaccharomyces pombe (strain 972 / ATCC 24843) OX=284812 GN=tim8 PE=3 SV=1	11.355	25.5	106630	2	15233
O59858	Glutathione peroxidase	gpx1	27.691	451	sp|O59858|GPX1_SCHPO Glutathione peroxidase-like peroxiredoxin gpx1 OS=Schizosaccharomyces pombe (strain 972 / ATCC 24843) OX=284812 GN=gpx1 PE=1 SV=1	18.06	53.8	151010	5	15101
O14088	Uncharacterized oxidoreductase C2F3.05c	SPAC2F3.05c	26.998	200	sp|O14088|YER5_SCHPO Uncharacterized oxidoreductase C2F3.05c OS=Schizosaccharomyces pombe (strain 972 / ATCC 24843) OX=284812 GN=SPAC2F3.05c PE=3 SV=1	31.172	19.6	271310	3	15073
P36627	Cellular nucleic acid-binding protein homolog	byr3	37.183	974	sp|P36627|BYR3_SCHPO Cellular nucleic acid-binding protein homolog OS=Schizosaccharomyces pombe (strain 972 / ATCC 24843) OX=284812 GN=byr3 PE=4 SV=1	19.342	39.7	180870	2	15072
O94574	Putative 2-hydroxyacid dehydrogenase C1773.17c		25.656	802	sp|O94574|YGDH_SCHPO Putative 2-hydroxyacid dehydrogenase C1773.17c OS=Schizosaccharomyces pombe (strain 972 / ATCC 24843) OX=284812 GN=SPBC1773.17c PE=3 SV=3	37.658	19.4	270980	5	15054
O13797	Small glutamine-rich tetratricopeptide repeat-containing protein 2	sgt2	65.035	105	sp|O13797|SGT2_SCHPO Small glutamine-rich tetratricopeptide repeat-containing protein 2 OS=Schizosaccharomyces pombe (strain 972 / ATCC 24843) OX=284812 GN=sgt2 PE=3 SV=1	34.001	43.2	240560	3	15035
Q11120	Prolyl 3,4-dihydroxylase ofd1	ofd1	83.301	1421	sp|Q11120|OFD1_SCHPO Prolyl 3,4-dihydroxylase ofd1 OS=Schizosaccharomyces pombe (strain 972 / ATCC 24843) OX=284812 GN=ofd1 PE=1 SV=1	59.177	26	388330	4	14936
Q9UQY2	Probable proteasome subunit beta type-6	pam1	25.309	1634	sp|Q9UQY2|PSB6_SCHPO Probable proteasome subunit beta type-6 OS=Schizosaccharomyces pombe (strain 972 / ATCC 24843) OX=284812 GN=pam1 PE=3 SV=1	25.082	30.7	133530	3	14836
Q10100	Nuclear transport factor 2	ntf2	38.452	1301	sp|Q10100|NTF2_SCHPO Nuclear transport factor 2 OS=Schizosaccharomyces pombe (strain 972 / ATCC 24843) OX=284812 GN=ntf2 PE=3 SV=2	14.078	43.9	73080	3	14616
O94389	Coiled-coil domain-containing protein 124 homolog	SPBC29A10.12	27.598	747	sp|O94389|CC124_SCHPO Coiled-coil domain-containing protein 124 homolog OS=Schizosaccharomyces pombe (strain 972 / ATCC 24843) OX=284812 GN=SPBC29A10.12 PE=3 SV=1	24.069	31.9	116620	4	14578
O59811	Cytoplasmic 60S subunit biogenesis factor SPCC550.15c	SPCC550.15c	59.679	439	sp|O59811|REI1_SCHPO Cytoplasmic 60S subunit biogenesis factor SPCC550.15c OS=Schizosaccharomyces pombe (strain 972 / ATCC 24843) OX=284812 GN=SPCC550.15c PE=1 SV=1	52.25	36.5	262230	5	14568
O42931	26S protease regulatory subunit 7 homolog	rpt1	95.816	346	sp|O42931|PRS7_SCHPO 26S proteasome regulatory subunit 7 homolog OS=Schizosaccharomyces pombe (strain 972 / ATCC 24843) OX=284812 GN=rpt1 PE=1 SV=2	48.965	23.5	446200	6	14393
Q10132	Isopentenyl-diphosphate Delta-isomerase	idi1	43.123	1307	sp|Q10132|IDI1_SCHPO Isopentenyl-diphosphate Delta-isomerase OS=Schizosaccharomyces pombe (strain 972 / ATCC 24843) OX=284812 GN=idi1 PE=2 SV=2	27.108	35.4	215650	3	14377
G2TRQ0	Uncharacterized protein tam13	tam13	69.483	46	sp|G2TRQ0|TAM13_SCHPO Uncharacterized protein tam13 OS=Schizosaccharomyces pombe (strain 972 / ATCC 24843) OX=284812 GN=tam13 PE=2 SV=1	10.171	35.8	71781	1	14356
Q9Y6Z9	Sorbose reductase sou1	sou1	46.878	1853	sp|Q9Y6Z9|SOU1_SCHPO Sorbose reductase sou1 OS=Schizosaccharomyces pombe (strain 972 / ATCC 24843) OX=284812 GN=sou1 PE=3 SV=1	27.437	18.8	185860	3	14297
Q9P7Y7	Pyrroline-5-carboxylate reductase	pro3	62.962	1628	sp|Q9P7Y7|P5CR_SCHPO Pyrroline-5-carboxylate reductase OS=Schizosaccharomyces pombe (strain 972 / ATCC 24843) OX=284812 GN=pro3 PE=3 SV=1	29.875	44	182850	3	14065
O74440	26S proteasome regulatory subunit rpn8	rpn8	26.281	547	sp|O74440|RPN8_SCHPO 26S proteasome regulatory subunit rpn8 OS=Schizosaccharomyces pombe (strain 972 / ATCC 24843) OX=284812 GN=rpn8 PE=3 SV=1	35.595	17	196830	3	14059
Q9UT21	Uncharacterized GTP-binding protein C9.07c	SPAC9.07c	75.88	1730	sp|Q9UT21|YFY7_SCHPO Uncharacterized GTP-binding protein C9.07c OS=Schizosaccharomyces pombe (strain 972 / ATCC 24843) OX=284812 GN=SPAC9.07c PE=2 SV=1	40.375	27.3	349490	6	13979
O42893	Neutral trehalase	ntp1	46.376	328	sp|O42893|TREA_SCHPO Cytosolic neutral trehalase OS=Schizosaccharomyces pombe (strain 972 / ATCC 24843) OX=284812 GN=ntp1 PE=1 SV=1	84.602	30.3	614270	14	13961
P78831	High-affinity glucose transporter ght5	ght5	26.844	1075	sp|P78831|GHT5_SCHPO High-affinity glucose transporter ght5 OS=Schizosaccharomyces pombe (strain 972 / ATCC 24843) OX=284812 GN=ght5 PE=1 SV=2	60.32	19	222230	2	13889
Q9UT36	Probable hydroxyacylglutathione hydrolase C824.07	SPAC824.07	87.639	1737	sp|Q9UT36|GLO21_SCHPO Probable hydroxyacylglutathione hydrolase C824.07 OS=Schizosaccharomyces pombe (strain 972 / ATCC 24843) OX=284812 GN=SPAC824.07 PE=3 SV=1	28.483	55.1	166320	3	13860
Q10311	Ankyrin repeat-containing protein C6C3.08	SPAC6C3.08	16.464	1373	sp|Q10311|YD58_SCHPO Ankyrin repeat-containing protein C6C3.08 OS=Schizosaccharomyces pombe (strain 972 / ATCC 24843) OX=284812 GN=SPAC6C3.08 PE=4 SV=1	25.93	47.9	179760	5	13828
Q9UTE2	Probable oxygen-dependent coproporphyrinogen-III oxidase	hem13	42.819	1765	sp|Q9UTE2|HEM6_SCHPO Probable oxygen-dependent coproporphyrinogen-III oxidase OS=Schizosaccharomyces pombe (strain 972 / ATCC 24843) OX=284812 GN=hem13 PE=3 SV=1	36.244	39.1	275920	4	13796
O43010	Glycylpeptide N-tetradecanoyltransferase	nmt1	85.902	366	sp|O43010|NMT_SCHPO Glycylpeptide N-tetradecanoyltransferase OS=Schizosaccharomyces pombe (strain 972 / ATCC 24843) OX=284812 GN=nmt1 PE=1 SV=1	53.696	29	344510	9	13780
O94374	Importin subunit alpha-2	imp1	32.83	745	sp|O94374|IMA2_SCHPO Importin subunit alpha-2 OS=Schizosaccharomyces pombe (strain 972 / ATCC 24843) OX=284812 GN=imp1 PE=1 SV=1	59.852	16.3	258450	5	13603
P36605	Histidinol-phosphate aminotransferase	his3	77.107	966	sp|P36605|HIS8_SCHPO Histidinol-phosphate aminotransferase OS=Schizosaccharomyces pombe (strain 972 / ATCC 24843) OX=284812 GN=his3 PE=3 SV=1	42.733	43	284890	5	13566
Q10475	Eukaryotic translation initiation factor 4 gamma	tif471	171.39	1407	sp|Q10475|IF4G_SCHPO Eukaryotic translation initiation factor 4 gamma OS=Schizosaccharomyces pombe (strain 972 / ATCC 24843) OX=284812 GN=tif471 PE=1 SV=1	154.03	24.7	918310	18	13505
Q10330	60S ribosomal protein L25-A	rpl25a	11.534	1380	sp|Q10330|RL25A_SCHPO 60S ribosomal protein L25-A OS=Schizosaccharomyces pombe (strain 972 / ATCC 24843) OX=284812 GN=rpl2501 PE=1 SV=1	15.835	43.3	67245	6	13449
O74496	Coatomer subunit delta	ret2	17.886	566	sp|O74496|COPD_SCHPO Coatomer subunit delta OS=Schizosaccharomyces pombe (strain 972 / ATCC 24843) OX=284812 GN=ret2 PE=3 SV=1	27.097	22.9	107410	2	13426
O13637	Protein transport protein sec31	sec31	171.63	63	sp|O13637|SEC31_SCHPO Protein transport protein sec31 OS=Schizosaccharomyces pombe (strain 972 / ATCC 24843) OX=284812 GN=sec31 PE=1 SV=1	132.5	26.9	950050	16	13381
Q10235	Cell polarity protein alp11	alp11	9.8642	1350	sp|Q10235|ALP11_SCHPO Cell polarity protein alp11 OS=Schizosaccharomyces pombe (strain 972 / ATCC 24843) OX=284812 GN=alp11 PE=1 SV=1	26.672	31.2	186840	2	13345
O94616	DNA-directed RNA polymerases I and III subunit RPAC1	rpc40	28.261	813	sp|O94616|RPAC1_SCHPO DNA-directed RNA polymerases I and III subunit RPAC1 OS=Schizosaccharomyces pombe (strain 972 / ATCC 24843) OX=284812 GN=rpc40 PE=1 SV=1	39.154	36.2	225720	5	13278
Q9UUC6	Small nuclear ribonucleoprotein Sm D3	smd3	6.0452	1824	sp|Q9UUC6|SMD3_SCHPO Small nuclear ribonucleoprotein Sm D3 OS=Schizosaccharomyces pombe (strain 972 / ATCC 24843) OX=284812 GN=smd3 PE=1 SV=1	11.033	19.6	79616	1	13269
Q09747	ATP-dependent RNA helicase dbp5	dbp5	66.641	1216	sp|Q09747|DBP5_SCHPO ATP-dependent RNA helicase dbp5 OS=Schizosaccharomyces pombe (strain 972 / ATCC 24843) OX=284812 GN=dbp5 PE=1 SV=1	56.304	31.2	410990	5	13258
P04689	Tubulin alpha-2 chain	tub1	67.033	852	sp|P04689|TBA2_SCHPO Tubulin alpha-2 chain OS=Schizosaccharomyces pombe (strain 972 / ATCC 24843) OX=284812 GN=tub1 PE=1 SV=2	50.535	49.2	264160	13	13208
Q9UT44	Probable gamma-glutamyl phosphate reductase	pro1	94.472	1738	sp|Q9UT44|PROA_SCHPO Probable gamma-glutamyl phosphate reductase OS=Schizosaccharomyces pombe (strain 972 / ATCC 24843) OX=284812 GN=pro1 PE=3 SV=1	48.706	39.7	394320	7	13144
Q10251	Eukaryotic translation initiation factor 5B	SPAC56F8.03	153.59	1355	sp|Q10251|IF2P_SCHPO Eukaryotic translation initiation factor 5B OS=Schizosaccharomyces pombe (strain 972 / ATCC 24843) OX=284812 GN=SPAC56F8.03 PE=1 SV=1	119.93	20.5	629810	12	13121
Q10481	Mitochondrial import inner membrane translocase subunit tim13	tim13	11.393	1410	sp|Q10481|TIM13_SCHPO Mitochondrial import inner membrane translocase subunit tim13 OS=Schizosaccharomyces pombe (strain 972 / ATCC 24843) OX=284812 GN=tim13 PE=3 SV=1	10.742	28.4	65461	1	13092
O74178	Protein kes1	kes1	51.484	503	sp|O74178|KES1_SCHPO Protein kes1 OS=Schizosaccharomyces pombe (strain 972 / ATCC 24843) OX=284812 GN=kes1 PE=2 SV=2	44.591	41	234900	5	13050
Q10452	Protein kinase gsk3	gsk3	8.0395	1406	sp|Q10452|GSK3_SCHPO Protein kinase gsk3 OS=Schizosaccharomyces pombe (strain 972 / ATCC 24843) OX=284812 GN=gsk3 PE=1 SV=3	44.165	14.7	247710	3	13037
Q9UT55	Protein-glutamate O-methyltransferase SPCC1393.13	SPAC806.04c	36.851	1742	sp|Q9UT55|ART1A_SCHPO Damage-control phosphatase SPAC806.04c OS=Schizosaccharomyces pombe (strain 972 / ATCC 24843) OX=284812 GN=SPAC806.04c PE=3 SV=2	49.894	18.5	285690	7	12986
O94664	Meiotically up-regulated gene 166 protein	mug166	17.612	830	sp|O94664|MU166_SCHPO Meiotically up-regulated gene 166 protein OS=Schizosaccharomyces pombe (strain 972 / ATCC 24843) OX=284812 GN=mug166 PE=1 SV=3	25.915	27.4	129590	1	12959
Q9HDV9	Putative glycine cleavage system H protein, mitochondrial	gcv3	21.22	1485	sp|Q9HDV9|GCSH_SCHPO Putative glycine cleavage system H protein, mitochondrial OS=Schizosaccharomyces pombe (strain 972 / ATCC 24843) OX=284812 GN=gcv3 PE=1 SV=1	18.017	11.2	77688	1	12948
Q09894	Uncharacterized protein C24B11.07c	SPAC24B11.07c	34.164	1269	sp|Q09894|YAI7_SCHPO Uncharacterized protein C24B11.07c OS=Schizosaccharomyces pombe (strain 972 / ATCC 24843) OX=284812 GN=SPAC24B11.07c PE=1 SV=1	62.463	20	283810	6	12900
O74563	E3 ubiquitin-protein ligase brl2	brl2	3.7909	591	sp|O74563|BRL2_SCHPO E3 ubiquitin-protein ligase brl2 OS=Schizosaccharomyces pombe (strain 972 / ATCC 24843) OX=284812 GN=brl2 PE=1 SV=1	78.052	6.8	552870	1	12857
P24782	ATP-dependent RNA helicase dbp2	dbp2	95.471	920	sp|P24782|DBP2_SCHPO ATP-dependent RNA helicase dbp2 OS=Schizosaccharomyces pombe (strain 972 / ATCC 24843) OX=284812 GN=dbp2 PE=2 SV=2	61.547	25.3	383800	8	12793
O94628	Uncharacterized methyltransferase C1347.09	SPBC1347.09	18.455	819	sp|O94628|YGE9_SCHPO Uncharacterized methyltransferase C1347.09 OS=Schizosaccharomyces pombe (strain 972 / ATCC 24843) OX=284812 GN=SPBC1347.09 PE=3 SV=1	31.71	20.1	178000	4	12714
Q9P7D4	Homocitrate dehydratase, mitochondrial	SPBP4H10.15	126.31	1575	sp|Q9P7D4|ACON2_SCHPO Homocitrate dehydratase, mitochondrial OS=Schizosaccharomyces pombe (strain 972 / ATCC 24843) OX=284812 GN=SPBP4H10.15 PE=3 SV=3	99.9	36.2	494580	9	12682
O74803	UV excision repair protein rhp23	rhp23	17.823	623	sp|O74803|RHP23_SCHPO UV excision repair protein rhp23 OS=Schizosaccharomyces pombe (strain 972 / ATCC 24843) OX=284812 GN=rhp23 PE=1 SV=1	40.135	10.1	164570	2	12659
O13656	Probable mitochondrial import receptor subunit tom40	tom40	91.182	68	sp|O13656|TOM40_SCHPO Probable mitochondrial import receptor subunit tom40 OS=Schizosaccharomyces pombe (strain 972 / ATCC 24843) OX=284812 GN=tom40 PE=3 SV=3	37.552	54.1	214170	5	12598
P50524	26S proteasome regulatory subunit rpn12	rpn12	54.273	1033	sp|P50524|RPN12_SCHPO 26S proteasome regulatory subunit rpn12 OS=Schizosaccharomyces pombe (strain 972 / ATCC 24843) OX=284812 GN=rpn12 PE=1 SV=1	30.899	39.3	188830	5	12589
Q10306	Probable citrate synthase, mitochondrial	cit1	95.736	1372	sp|Q10306|CISY_SCHPO Probable citrate synthase, mitochondrial OS=Schizosaccharomyces pombe (strain 972 / ATCC 24843) OX=284812 GN=cit1 PE=3 SV=3	54.16	24.6	299160	4	12465
Q9UTI0	Probable dihydroorotase	ura2	30.939	1776	sp|Q9UTI0|PYRC_SCHPO Probable dihydroorotase OS=Schizosaccharomyces pombe (strain 972 / ATCC 24843) OX=284812 GN=ura2 PE=3 SV=1	37.552	11.3	185710	3	12381
P17610	GTP-binding protein ypt3	ypt3	57.475	900	sp|P17610|YPT3_SCHPO GTP-binding protein ypt3 OS=Schizosaccharomyces pombe (strain 972 / ATCC 24843) OX=284812 GN=ypt3 PE=1 SV=1	23.861	37.9	147790	2	12316
Q7Z9I2	Uncharacterized oxidoreductase C663.09c	SPCC663.09c	38.745	1433	sp|Q7Z9I2|YCP9_SCHPO Uncharacterized oxidoreductase C663.09c OS=Schizosaccharomyces pombe (strain 972 / ATCC 24843) OX=284812 GN=SPCC663.09c PE=3 SV=1	27.946	42.7	183410	3	12227
O43030	Hsp70 nucleotide exchange factor fes1	fes1	49.309	375	sp|O43030|FES1_SCHPO Hsp70 nucleotide exchange factor fes1 OS=Schizosaccharomyces pombe (strain 972 / ATCC 24843) OX=284812 GN=fes1 PE=1 SV=1	32.744	33.1	231610	4	12190
O94284	Sulfide:quinone oxidoreductase, mitochondrial	hmt2	206.04	709	sp|O94284|HMT2_SCHPO Sulfide:quinone oxidoreductase, mitochondrial OS=Schizosaccharomyces pombe (strain 972 / ATCC 24843) OX=284812 GN=hmt2 PE=3 SV=1	51.574	48.8	365120	8	12171
Q10414	CWF19-like protein mug161	mug161	90.748	1396	sp|Q10414|MU161_SCHPO CWF19-like protein mug161 OS=Schizosaccharomyces pombe (strain 972 / ATCC 24843) OX=284812 GN=mug161 PE=1 SV=1	63.216	12.3	327820	4	12141
P17608	GTP-binding protein ryh1	ryh1	6.2665	898	sp|P17608|RYH1_SCHPO GTP-binding protein ryh1 OS=Schizosaccharomyces pombe (strain 972 / ATCC 24843) OX=284812 GN=ryh1 PE=1 SV=1	23.136	5.5	121340	1	12134
O14080	Uncharacterized protein UNK4,15		7.5275	197	sp|O14080|YEAF_SCHPO Uncharacterized protein UNK4,15 OS=Schizosaccharomyces pombe (strain 972 / ATCC 24843) OX=284812 GN=SPAC2E11.15 PE=4 SV=1	23.655	33.7	108580	3	12065
O13867	Uracil phosphoribosyltransferase 1	SPAC1B3.01c	40.141	132	sp|O13867|UPP1_SCHPO Uracil phosphoribosyltransferase 1 OS=Schizosaccharomyces pombe (strain 972 / ATCC 24843) OX=284812 GN=SPAC1B3.01c PE=3 SV=1	24.466	30.6	131460	2	11951
Q9P3U7	Probable high-affinity hexose transporter ght8, mitochondrial	ght8	109.41	1523	sp|Q9P3U7|GHT8_SCHPO Probable high-affinity hexose transporter ght8, mitochondrial OS=Schizosaccharomyces pombe (strain 972 / ATCC 24843) OX=284812 GN=ght8 PE=1 SV=1	60.176	11.5	201970	3	11881
O59680	Cytochrome c1, heme protein, mitochondrial	cyt1	83.529	406	sp|O59680|CY1_SCHPO Cytochrome c1, heme protein, mitochondrial OS=Schizosaccharomyces pombe (strain 972 / ATCC 24843) OX=284812 GN=cyt1 PE=3 SV=1	34.34	28.3	130250	2	11841
Q9Y700	Elongation factor Tu, mitochondrial	tuf1	63.259	1854	sp|Q9Y700|EFTU_SCHPO Elongation factor Tu, mitochondrial OS=Schizosaccharomyces pombe (strain 972 / ATCC 24843) OX=284812 GN=tuf1 PE=3 SV=1	48.282	31.2	283670	6	11819
Q9US35	D-serine dehydratase	SPAC1039.06	39.55	1663	sp|Q9US35|DSD1_SCHPO D-serine dehydratase OS=Schizosaccharomyces pombe (strain 972 / ATCC 24843) OX=284812 GN=SPAC1039.06 PE=3 SV=1	45.647	26.5	295400	5	11816
O60122	Anthranilate phosphoribosyltransferase	trp4	59.332	477	sp|O60122|TRPD_SCHPO Anthranilate phosphoribosyltransferase OS=Schizosaccharomyces pombe (strain 972 / ATCC 24843) OX=284812 GN=trp4 PE=3 SV=1	37.556	26.6	165030	3	11788
O14019	Serine/threonine-protein kinase hal4	hal4	28.65	173	sp|O14019|HAL4_SCHPO Serine/threonine-protein kinase hal4 OS=Schizosaccharomyces pombe (strain 972 / ATCC 24843) OX=284812 GN=hal4 PE=1 SV=1	69.114	15.3	341550	5	11777
O14359	Uncharacterized AIM2 family protein C30D10.14	SPBC30D10.14	20.32	280	sp|O14359|YB4E_SCHPO Uncharacterized AIM2 family protein C30D10.14 OS=Schizosaccharomyces pombe (strain 972 / ATCC 24843) OX=284812 GN=SPBC30D10.14 PE=3 SV=1	27.414	19.7	175730	2	11715
O94313	Carbamoyl-phosphate synthase arginine-specific large chain	arg4	131.18	720	sp|O94313|CARB_SCHPO Carbamoyl-phosphate synthase arginine-specific large chain OS=Schizosaccharomyces pombe (strain 972 / ATCC 24843) OX=284812 GN=arg4 PE=3 SV=1	127.48	28.7	761500	11	11715
P53693	Protein rds1	rds1	47.439	1041	sp|P53693|RDS1_SCHPO Protein rds1 OS=Schizosaccharomyces pombe (strain 972 / ATCC 24843) OX=284812 GN=rds1 PE=2 SV=2	43.827	17.4	70059	1	11676
B5BP46	Putative glutathione S-transferase C1183.02	SPBC460.02c	51.222	3	sp|B5BP46|YP52_SCHPO Putative glutathione S-transferase C460.02c OS=Schizosaccharomyces pombe (strain 972 / ATCC 24843) OX=284812 GN=SPBC460.02c PE=3 SV=1	25.717	35.9	186640	3	11665
Q10202	ATP-dependent RNA helicase dbp3	dbp3	65.878	1338	sp|Q10202|DBP3_SCHPO ATP-dependent RNA helicase dbp3 OS=Schizosaccharomyces pombe (strain 972 / ATCC 24843) OX=284812 GN=dbp3 PE=3 SV=1	63.912	28.9	380110	9	11518
Q9UR06	Protein mmf2, mitochondrial	mmf2	12.447	1635	sp|Q9UR06|MMF2_SCHPO Protein mmf2, mitochondrial OS=Schizosaccharomyces pombe (strain 972 / ATCC 24843) OX=284812 GN=mmf2 PE=3 SV=1	13.344	42.9	115100	2	11510
Q9USH9	Uncharacterized ABC transporter ATP-binding protein C825.01	SPCC825.01	84.244	1674	sp|Q9USH9|YJQ1_SCHPO Uncharacterized ABC transporter ATP-binding protein C825.01 OS=Schizosaccharomyces pombe (strain 972 / ATCC 24843) OX=284812 GN=SPCC825.01 PE=1 SV=1	92.689	16.2	402670	7	11505
Q9P7Q4	Vesicular-fusion protein sec18	sec18	123.41	1604	sp|Q9P7Q4|SEC18_SCHPO Vesicular-fusion protein sec18 OS=Schizosaccharomyces pombe (strain 972 / ATCC 24843) OX=284812 GN=sec18 PE=1 SV=1	87.553	25.3	540190	11	11493
O43014	Mannose-6-phosphate isomerase	pmi40	55.449	369	sp|O43014|MPI_SCHPO Mannose-6-phosphate isomerase OS=Schizosaccharomyces pombe (strain 972 / ATCC 24843) OX=284812 GN=pmi40 PE=3 SV=1	45.59	26.7	194990	6	11470
Q09816	S-methyl-5-thioadenosine phosphorylase	SPAC16C9.02c	56.524	1244	sp|Q09816|MTAP_SCHPO S-methyl-5-thioadenosine phosphorylase OS=Schizosaccharomyces pombe (strain 972 / ATCC 24843) OX=284812 GN=SPAC16C9.02c PE=3 SV=1	33.847	36.2	159930	5	11423
O43056	Probable homoserine kinase	SPBC4C3.03	30.931	385	sp|O43056|KHSE_SCHPO Probable homoserine kinase OS=Schizosaccharomyces pombe (strain 972 / ATCC 24843) OX=284812 GN=SPBC4C3.03 PE=3 SV=1	36.608	27.2	193480	4	11381
Q10258	Methylenetetrahydrofolate reductase 1	met9	32.826	1358	sp|Q10258|MTHR1_SCHPO Methylenetetrahydrofolate reductase 1 OS=Schizosaccharomyces pombe (strain 972 / ATCC 24843) OX=284812 GN=met9 PE=1 SV=1	69.011	20.4	363360	6	11355
Q10094	Uncharacterized protein C11D3.15	SPAC11D3.15	191.41	1298	sp|Q10094|YAOF_SCHPO Uncharacterized protein C11D3.15 OS=Schizosaccharomyces pombe (strain 972 / ATCC 24843) OX=284812 GN=SPAC11D3.15 PE=3 SV=1	143.72	37.7	818740	19	11216
P05933	Calmodulin	cam1	20.374	860	sp|P05933|CALM_SCHPO Calmodulin OS=Schizosaccharomyces pombe (strain 972 / ATCC 24843) OX=284812 GN=cam1 PE=1 SV=1	16.905	16	78178	1	11168
P78761	Cytochrome b-c1 complex subunit 2, mitochondrial	qcr2	33.979	1055	sp|P78761|QCR2_SCHPO Cytochrome b-c1 complex subunit 2, mitochondrial OS=Schizosaccharomyces pombe (strain 972 / ATCC 24843) OX=284812 GN=qcr2 PE=2 SV=2	45.651	28.4	285100	5	10965
Q10343	5-AMP-activated protein kinase subunit gamma	cbs2	21.272	1386	sp|Q10343|AAKG_SCHPO 5-AMP-activated protein kinase subunit gamma OS=Schizosaccharomyces pombe (strain 972 / ATCC 24843) OX=284812 GN=cbs2 PE=1 SV=2	37.427	14.1	175220	2	10952
O14301	Uncharacterized WD repeat-containing protein C9G1.05	SPAC9G1.05	119.02	260	sp|O14301|YE85_SCHPO Uncharacterized WD repeat-containing protein C9G1.05 OS=Schizosaccharomyces pombe (strain 972 / ATCC 24843) OX=284812 GN=SPAC9G1.05 PE=3 SV=1	65.266	39.8	357990	8	10848
Q9US25	Chromodomain helicase hrp1	hrp1	25.91	1661	sp|Q9US25|HRP1_SCHPO Chromodomain helicase hrp1 OS=Schizosaccharomyces pombe (strain 972 / ATCC 24843) OX=284812 GN=hrp1 PE=1 SV=1	158.55	6.2	725430	1	10827
P87171	Ribose-phosphate pyrophosphokinase 5	SPBC3D6.06c	44.937	1135	sp|P87171|KPR5_SCHPO Ribose-phosphate pyrophosphokinase 5 OS=Schizosaccharomyces pombe (strain 972 / ATCC 24843) OX=284812 GN=SPBC3D6.06c PE=3 SV=1	37.338	22.6	129770	4	10814
O59760	Putative uncharacterized hydrolase C1020.07	SPCC1020.07	44.982	422	sp|O59760|YJM7_SCHPO Putative uncharacterized hydrolase C1020.07 OS=Schizosaccharomyces pombe (strain 972 / ATCC 24843) OX=284812 GN=SPCC1020.07 PE=3 SV=1	26.496	41.9	128520	3	10710
O94271	Uncharacterized RING finger protein P8B7.23	SPBP8B7.23	2.6976	701	sp|O94271|YORN_SCHPO Uncharacterized RING finger protein P8B7.23 OS=Schizosaccharomyces pombe (strain 972 / ATCC 24843) OX=284812 GN=SPBP8B7.23 PE=4 SV=1	76.459	5.5	288910	1	10701
Q10305	Probable secretory pathway GDP dissociation inhibitor 1	gdi1	30.088	1371	sp|Q10305|GDI1_SCHPO Probable secretory pathway GDP dissociation inhibitor 1 OS=Schizosaccharomyces pombe (strain 972 / ATCC 24843) OX=284812 GN=gdi1 PE=3 SV=1	49.555	34.1	256700	6	10696
P36596	Squalene synthase	erg9	99.52	959	sp|P36596|FDFT_SCHPO Squalene synthase OS=Schizosaccharomyces pombe (strain 972 / ATCC 24843) OX=284812 GN=erg9 PE=1 SV=1	53.321	34.1	277250	3	10663
Q10484	Uncharacterized protein C17C9.12	SPAC17C9.12	28.292	1412	sp|Q10484|SCS22_SCHPO Vesicle-associated membrane protein-associated protein scs22 OS=Schizosaccharomyces pombe (strain 972 / ATCC 24843) OX=284812 GN=scs22 PE=1 SV=2	34.005	23.2	147750	2	10554
O59866	Dolichyl-diphosphooligosaccharide--protein glycosyltransferase subunit wbp1	wbp1	121.01	453	sp|O59866|OSTB_SCHPO Dolichyl-diphosphooligosaccharide--protein glycosyltransferase subunit wbp1 OS=Schizosaccharomyces pombe (strain 972 / ATCC 24843) OX=284812 GN=wbp1 PE=2 SV=2	48.898	50.3	230660	5	10484
Q9UT59	Putative uncharacterized oxidoreductase C513.07	SPAC513.07	63.433	1745	sp|Q9UT59|YKJ7_SCHPO Putative uncharacterized oxidoreductase C513.07 OS=Schizosaccharomyces pombe (strain 972 / ATCC 24843) OX=284812 GN=SPAC513.07 PE=3 SV=1	37.461	24.1	178210	3	10483
O74511	Extragenic suppressor of kinetochore protein 1	ekc1	100.71	573	sp|O74511|EKC1_SCHPO Extragenic suppressor of kinetochore protein 1 OS=Schizosaccharomyces pombe (strain 972 / ATCC 24843) OX=284812 GN=ekc1 PE=1 SV=2	94.966	21.2	352920	5	10380
O74519	Uncharacterized N-acetyltransferase C663.13c	SPCC663.13c	9.7927	574	sp|O74519|YCPD_SCHPO Uncharacterized N-acetyltransferase C663.13c OS=Schizosaccharomyces pombe (strain 972 / ATCC 24843) OX=284812 GN=SPCC663.13c PE=3 SV=1	16.323	16	93198	2	10355
Q09740	Probable glutamine--fructose-6-phosphate aminotransferase [isomerizing]		56.244	1211	sp|Q09740|GFA1_SCHPO Probable glutamine--fructose-6-phosphate aminotransferase [isomerizing] OS=Schizosaccharomyces pombe (strain 972 / ATCC 24843) OX=284812 GN=SPBC12C2.11 PE=3 SV=2	77.321	24.4	370580	9	10294
O14092	5-aminolevulinate synthase, mitochondrial	hem1	59.712	202	sp|O14092|HEM1_SCHPO 5-aminolevulinate synthase, mitochondrial OS=Schizosaccharomyces pombe (strain 972 / ATCC 24843) OX=284812 GN=hem1 PE=3 SV=1	60.959	34.6	298230	6	10284
O42644	CTP synthase	ura7	71.749	301	sp|O42644|PYRG_SCHPO CTP synthase OS=Schizosaccharomyces pombe (strain 972 / ATCC 24843) OX=284812 GN=ura7 PE=3 SV=1	66.867	29.2	245470	6	10228
Q9URW6	SH3 domain-containing protein PJ696.02	SPAPJ696.02	37.261	1643	sp|Q9URW6|YIE2_SCHPO SH3 domain-containing protein PJ696.02 OS=Schizosaccharomyces pombe (strain 972 / ATCC 24843) OX=284812 GN=SPAPJ696.02 PE=1 SV=1	46.373	32.3	212890	7	10138
Q92370	Multifunctional tryptophan biosynthesis protein;Anthranilate synthase component 2;Indole-3-glycerol phosphate synthase;N-(5-phosphoribosyl)anthranilate isomerase	trp1	115.48	1452	sp|Q92370|TRPG_SCHPO Multifunctional tryptophan biosynthesis protein OS=Schizosaccharomyces pombe (strain 972 / ATCC 24843) OX=284812 GN=trp1 PE=2 SV=2	83.039	28.9	434380	9	10102
Q09893	Uncharacterized protein C24B11.05	SPAC24B11.05	10.435	1268	sp|Q09893|YAI5_SCHPO Uncharacterized protein C24B11.05 OS=Schizosaccharomyces pombe (strain 972 / ATCC 24843) OX=284812 GN=SPAC24B11.05 PE=3 SV=1	26.513	27	151010	3	10067
O74526	Probable serine/threonine-protein kinase C70.05c	SPCC70.05c	90.398	578	sp|O74526|KJ45_SCHPO Probable serine/threonine-protein kinase C70.05c OS=Schizosaccharomyces pombe (strain 972 / ATCC 24843) OX=284812 GN=SPCC70.05c PE=1 SV=1	85.909	17	391820	7	10047
O94634	Threonine dehydratase, mitochondrial	SPBC1677.03c	100.3	820	sp|O94634|THDH_SCHPO Threonine dehydratase, mitochondrial OS=Schizosaccharomyces pombe (strain 972 / ATCC 24843) OX=284812 GN=SPBC1677.03c PE=3 SV=1	66.543	33.5	311250	5	10040
Q09788	Alkali-sensitive linkage protein 1	asl1	6.1767	1234	sp|Q09788|ASL1_SCHPO Alkali-sensitive linkage protein 1 OS=Schizosaccharomyces pombe (strain 972 / ATCC 24843) OX=284812 GN=asl1 PE=1 SV=1	54.21	7.2	30025	1	10008
P87140	Probable coatomer subunit gamma	sec21	82.626	1123	sp|P87140|COPG_SCHPO Probable coatomer subunit gamma OS=Schizosaccharomyces pombe (strain 972 / ATCC 24843) OX=284812 GN=sec21 PE=1 SV=1	100.93	20.8	409820	7	9995.7
O94505	3(2),5-bisphosphate nucleotidase	tol1	44.51	781	sp|O94505|DPNP_SCHPO 3(2),5-bisphosphate nucleotidase OS=Schizosaccharomyces pombe (strain 972 / ATCC 24843) OX=284812 GN=tol1 PE=3 SV=1	38.747	39.9	219550	4	9979.5
Q9HGP5	F-actin-capping protein subunit beta	acp2	58.571	1512	sp|Q9HGP5|CAPZB_SCHPO F-actin-capping protein subunit beta OS=Schizosaccharomyces pombe (strain 972 / ATCC 24843) OX=284812 GN=acp2 PE=1 SV=1	29.845	20.1	149400	3	9960
Q10057	Putative protein disulfide-isomerase C1F5.02	SPAC1F5.02	105.85	1290	sp|Q10057|PDI1_SCHPO Putative protein disulfide-isomerase C1F5.02 OS=Schizosaccharomyces pombe (strain 972 / ATCC 24843) OX=284812 GN=SPAC1F5.02 PE=3 SV=1	54.88	39	276690	5	9881.7
P31406	V-type proton ATPase catalytic subunit A	vma1	109.28	936	sp|P31406|VATA_SCHPO V-type proton ATPase catalytic subunit A OS=Schizosaccharomyces pombe (strain 972 / ATCC 24843) OX=284812 GN=vma1 PE=3 SV=1	68.805	31.3	355560	7	9876.6
Q10215	Putative thiosulfate sulfurtransferase, mitochondrial	SPAC4H3.07c	11.457	1343	sp|Q10215|RDL_SCHPO Putative thiosulfate sulfurtransferase, mitochondrial OS=Schizosaccharomyces pombe (strain 972 / ATCC 24843) OX=284812 GN=SPAC4H3.07c PE=3 SV=2	16.185	32.4	78381	1	9797.7
Q92372	Replication factor A protein 1	ssb1	38.053	1454	sp|Q92372|RFA1_SCHPO Replication factor A protein 1 OS=Schizosaccharomyces pombe (strain 972 / ATCC 24843) OX=284812 GN=ssb1 PE=1 SV=1	68.196	19.9	291500	5	9716.6
P31318	Protein arg11, mitochondrial;N-acetyl-gamma-glutamyl-phosphate reductase;Acetylglutamate kinase	arg11	69.302	935	sp|P31318|ARG56_SCHPO Protein arg11, mitochondrial OS=Schizosaccharomyces pombe (strain 972 / ATCC 24843) OX=284812 GN=arg11 PE=3 SV=2	97.704	25.8	396880	7	9679.9
O94320	Aspartate aminotransferase, mitochondrial	SPBC725.01	64.974	725	sp|O94320|AATM_SCHPO Aspartate aminotransferase, mitochondrial OS=Schizosaccharomyces pombe (strain 972 / ATCC 24843) OX=284812 GN=SPBC725.01 PE=3 SV=1	48.243	35	231580	5	9649.1
Q9UTC9	Probable prefoldin subunit 2	SPAC227.10	90.46	1761	sp|Q9UTC9|PFD2_SCHPO Probable prefoldin subunit 2 OS=Schizosaccharomyces pombe (strain 972 / ATCC 24843) OX=284812 GN=SPAC227.10 PE=3 SV=1	13.296	62.3	86427	4	9603
Q09768	Glutamate--cysteine ligase	gcs1	36.51	1224	sp|Q09768|GSH1_SCHPO Glutamate--cysteine ligase OS=Schizosaccharomyces pombe (strain 972 / ATCC 24843) OX=284812 GN=gcs1 PE=3 SV=1	76.522	20	361980	7	9525.9
Q9P544	Probable mitochondrial outer membrane protein porin	SPAC1635.01	169.51	1527	sp|Q9P544|VDAC_SCHPO Probable mitochondrial outer membrane protein porin OS=Schizosaccharomyces pombe (strain 972 / ATCC 24843) OX=284812 GN=SPAC1635.01 PE=3 SV=1	29.653	58.5	132000	3	9428.6
O14466	Dolichol-phosphate mannosyltransferase	dpm1	63.44	292	sp|O14466|DPM1_SCHPO Dolichol-phosphate mannosyltransferase OS=Schizosaccharomyces pombe (strain 972 / ATCC 24843) OX=284812 GN=dpm1 PE=2 SV=1	26.672	64.8	131600	4	9399.7
O94650	Ubiquitin-like modifier hub1	hub1	2.1847	824	sp|O94650|HUB1_SCHPO Ubiquitin-like modifier hub1 OS=Schizosaccharomyces pombe (strain 972 / ATCC 24843) OX=284812 GN=hub1 PE=1 SV=1	8.4347	15.1	37303	1	9325.6
O74799	Glucan 1,3-beta-glucosidase 3	exg3	21.448	622	sp|O74799|EXG3_SCHPO Glucan 1,3-beta-glucosidase 3 OS=Schizosaccharomyces pombe (strain 972 / ATCC 24843) OX=284812 GN=exg3 PE=3 SV=1	53.701	17.9	214290	5	9316.8
O43050	Sterol-4-alpha-carboxylate 3-dehydrogenase, decarboxylating	erg26	32.481	383	sp|O43050|ERG26_SCHPO Sterol-4-alpha-carboxylate 3-dehydrogenase, decarboxylating OS=Schizosaccharomyces pombe (strain 972 / ATCC 24843) OX=284812 GN=erg26 PE=3 SV=1	38.317	19.7	129970	3	9283.8
O43047	GrpE protein homolog, mitochondrial	mge1	15.215	380	sp|O43047|GRPE_SCHPO GrpE protein homolog, mitochondrial OS=Schizosaccharomyces pombe (strain 972 / ATCC 24843) OX=284812 GN=mge1 PE=3 SV=1	25.334	25.6	91885	2	9188.5
Q10489	Pyruvate dehydrogenase E1 component subunit alpha, mitochondrial	pda1	56.64	1413	sp|Q10489|ODPA_SCHPO Pyruvate dehydrogenase E1 component subunit alpha, mitochondrial OS=Schizosaccharomyces pombe (strain 972 / ATCC 24843) OX=284812 GN=pda1 PE=1 SV=1	45.137	36.7	210020	5	9131.4
O74432	Golgi to ER traffic protein 4	get4	37.909	544	sp|O74432|GET4_SCHPO Golgi to ER traffic protein 4 OS=Schizosaccharomyces pombe (strain 972 / ATCC 24843) OX=284812 GN=get4 PE=3 SV=1	34.352	15.8	155220	3	9130.4
Q09914	GTP-binding protein rho1	rho1	61.873	1280	sp|Q09914|RHO1_SCHPO GTP-binding protein rho1 OS=Schizosaccharomyces pombe (strain 972 / ATCC 24843) OX=284812 GN=rho1 PE=2 SV=1	22.523	22.8	90824	2	9082.4
O00087	Dihydrolipoyl dehydrogenase, mitochondrial	dld1	32.249	51	sp|O00087|DLDH_SCHPO Dihydrolipoyl dehydrogenase, mitochondrial OS=Schizosaccharomyces pombe (strain 972 / ATCC 24843) OX=284812 GN=dld1 PE=2 SV=2	54.731	26.8	271480	7	9049.4
Q9URX0	Uncharacterized oxidoreductase C922.06	SPAC922.06	15.092	1646	sp|Q9URX0|YLX6_SCHPO Uncharacterized oxidoreductase C922.06 OS=Schizosaccharomyces pombe (strain 972 / ATCC 24843) OX=284812 GN=SPAC922.06 PE=3 SV=1	27.749	29.8	126280	3	9019.7
O94586	Hit family protein 1	hnt1	18.848	807	sp|O94586|HNT1_SCHPO Adenosine 5-monophosphoramidase hnt1 OS=Schizosaccharomyces pombe (strain 972 / ATCC 24843) OX=284812 GN=hnt1 PE=3 SV=1	14.58	26.3	80904	1	8989.4
P21565	Signal recognition particle 54 kDa protein homolog	srp54	49.905	908	sp|P21565|SRP54_SCHPO Signal recognition particle 54 kDa protein homolog OS=Schizosaccharomyces pombe (strain 972 / ATCC 24843) OX=284812 GN=srp54 PE=1 SV=1	56.697	18	242170	6	8969.4
Q09717	Ran-specific GTPase-activating protein 1	sbp1	164.98	1202	sp|Q09717|RANG_SCHPO Ran-specific GTPase-activating protein 1 OS=Schizosaccharomyces pombe (strain 972 / ATCC 24843) OX=284812 GN=sbp1 PE=1 SV=1	24.15	60	107490	2	8957.3
P36581	Calnexin homolog	cal1	90.151	950	sp|P36581|CALX_SCHPO Calnexin homolog OS=Schizosaccharomyces pombe (strain 972 / ATCC 24843) OX=284812 GN=cal1 PE=1 SV=1	63.465	19.5	257010	3	8862.4
Q9USJ9	54S ribosomal protein L12, mitochondrial	mnp1	10.64	1680	sp|Q9USJ9|MNP1_SCHPO 54S ribosomal protein L12, mitochondrial OS=Schizosaccharomyces pombe (strain 972 / ATCC 24843) OX=284812 GN=mrpl12 PE=3 SV=2	18.966	15	61660	2	8808.6
Q9Y7R8	Malate dehydrogenase, mitochondrial	MDH1	68.697	1878	sp|Q9Y7R8|MDHM_SCHPO Malate dehydrogenase, mitochondrial OS=Schizosaccharomyces pombe (strain 972 / ATCC 24843) OX=284812 GN=MDH1 PE=3 SV=1	35.787	50.1	167150	4	8797.3
Q9HDU3	Bifunctional protein gal10;UDP-glucose 4-epimerase;Aldose 1-epimerase	gal10	1.637	1484	sp|Q9HDU3|GAL10_SCHPO Bifunctional protein gal10 OS=Schizosaccharomyces pombe (strain 972 / ATCC 24843) OX=284812 GN=gal10 PE=3 SV=1	80.665	2.9	368020	1	8762.5
O74489	Probable quinone oxidoreductase	zta1	44.163	565	sp|O74489|QOR_SCHPO Probable quinone oxidoreductase OS=Schizosaccharomyces pombe (strain 972 / ATCC 24843) OX=284812 GN=zta1 PE=1 SV=2	34.947	25.5	157060	2	8725.3
O14255	Probable mannosyl-oligosaccharide glucosidase	SPAC6G10.09	177.95	249	sp|O14255|GCS1_SCHPO Probable mannosyl-oligosaccharide glucosidase OS=Schizosaccharomyces pombe (strain 972 / ATCC 24843) OX=284812 GN=SPAC6G10.09 PE=3 SV=1	92.888	40.2	395810	8	8604.6
Q9P6M1	Glutathione S-transferase 3	gst3	12.484	1544	sp|Q9P6M1|GST3_SCHPO Glutathione S-transferase 3 OS=Schizosaccharomyces pombe (strain 972 / ATCC 24843) OX=284812 GN=gst3 PE=1 SV=3	28.113	19.4	68613	2	8576.6
O94721	RWD domain-containing protein C1393.09c	SPCC1393.09c	26.602	844	sp|O94721|YCF9_SCHPO RWD domain-containing protein C1393.09c OS=Schizosaccharomyces pombe (strain 972 / ATCC 24843) OX=284812 GN=SPCC1393.09c PE=4 SV=1	24.688	22.3	111110	2	8547.2
Q9Y7N4	D-amino-acid oxidase	dao1	21.267	1870	sp|Q9Y7N4|OXDA_SCHPO D-amino-acid oxidase OS=Schizosaccharomyces pombe (strain 972 / ATCC 24843) OX=284812 GN=dao1 PE=3 SV=1	38.714	10.6	136580	2	8535.9
Q9P6K9	Deoxyhypusine hydroxylase	lia1	28.444	1541	sp|Q9P6K9|DOHH_SCHPO Deoxyhypusine hydroxylase OS=Schizosaccharomyces pombe (strain 972 / ATCC 24843) OX=284812 GN=lia1 PE=3 SV=1	35.689	34.3	153220	3	8512.3
Q9USG8	Meiotically up-regulated gene 190 protein	mug190	13.39	1671	sp|Q9USG8|MU190_SCHPO Meiotically up-regulated gene 190 protein OS=Schizosaccharomyces pombe (strain 972 / ATCC 24843) OX=284812 GN=mug190 PE=1 SV=1	133.68	5.4	508540	3	8475.7
Q9P7D6	UPF0303 protein P4H10.12	SPBP4H10.12	3.2557	1576	sp|Q9P7D6|YOFC_SCHPO UPF0303 protein P4H10.12 OS=Schizosaccharomyces pombe (strain 972 / ATCC 24843) OX=284812 GN=SPBP4H10.12 PE=3 SV=2	20.101	14	75829	2	8425.4
O42888	Uncharacterized oxidoreductase C8E4.04	SPBC8E4.04	41.785	326	sp|O42888|YBN4_SCHPO Uncharacterized oxidoreductase C8E4.04 OS=Schizosaccharomyces pombe (strain 972 / ATCC 24843) OX=284812 GN=SPBC8E4.04 PE=3 SV=1	36.628	49.8	159700	5	8405.1
Q9HDZ8	Uncharacterized protein C589.06c	SPAC589.06c	40.458	1494	sp|Q9HDZ8|YKP6_SCHPO Uncharacterized protein C589.06c OS=Schizosaccharomyces pombe (strain 972 / ATCC 24843) OX=284812 GN=SPAC589.06c PE=1 SV=1	21.742	43.6	83983	1	8398.3
O43024	CUE domain-containing protein C354.10	SPBC354.10	24.676	371	sp|O43024|YGVA_SCHPO CUE domain-containing protein C354.10 OS=Schizosaccharomyces pombe (strain 972 / ATCC 24843) OX=284812 GN=SPBC354.10 PE=1 SV=1	100.13	9.8	250660	5	8355.4
O14353	Biotin--protein ligase;Biotin--[methylmalonyl-CoA-carboxytransferase] ligase;Biotin--[propionyl-CoA-carboxylase [ATP-hydrolyzing]] ligase;Biotin--[methylcrotonoyl-CoA-carboxylase] ligase;Biotin--[acetyl-CoA-carboxylase] ligase	bpl1	35.317	279	sp|O14353|BPL1_SCHPO Biotin--protein ligase OS=Schizosaccharomyces pombe (strain 972 / ATCC 24843) OX=284812 GN=bpl1 PE=3 SV=1	70.631	17.3	224830	5	8327
O13804	Uncharacterized protein C17H9.07	SPAC17H9.07	6.6547	107	sp|O13804|YE07_SCHPO Uncharacterized protein C17H9.07 OS=Schizosaccharomyces pombe (strain 972 / ATCC 24843) OX=284812 GN=SPAC17H9.07 PE=4 SV=1	13.412	11.7	58021	1	8288.7
Q9UTE3	Rpb7-binding protein seb1	seb1	42.373	1766	sp|Q9UTE3|SEB1_SCHPO Rpb7-binding protein seb1 OS=Schizosaccharomyces pombe (strain 972 / ATCC 24843) OX=284812 GN=seb1 PE=1 SV=3	66.439	14.4	172860	4	8231.3
O13810	Probable glutamate 5-kinase	SPAC17H9.13c	46.743	110	sp|O13810|PROB_SCHPO Probable glutamate 5-kinase OS=Schizosaccharomyces pombe (strain 972 / ATCC 24843) OX=284812 GN=SPAC17H9.13c PE=3 SV=1	43.933	27.4	164480	5	8224.1
Q9P6K3	UPF0662 protein C30C2.08	SPAC30C2.08	68.085	1539	sp|Q9P6K3|CUB1_SCHPO CUB1 family protein C30C2.08 OS=Schizosaccharomyces pombe (strain 972 / ATCC 24843) OX=284812 GN=SPAC30C2.08 PE=3 SV=1	52.69	29.3	227560	4	8127.2
Q9P6Q5	Probable deoxyuridine 5-triphosphate nucleotidohydrolase	SPAC644.05c	12.65	1552	sp|Q9P6Q5|DUT_SCHPO Probable deoxyuridine 5-triphosphate nucleotidohydrolase OS=Schizosaccharomyces pombe (strain 972 / ATCC 24843) OX=284812 GN=SPAC644.05c PE=3 SV=1	14.862	10	65004	1	8125.5
O13622	ATP-dependent RNA helicase mss116, mitochondrial	mss116	64.391	61	sp|O13622|MS116_SCHPO ATP-dependent RNA helicase mss116, mitochondrial OS=Schizosaccharomyces pombe (strain 972 / ATCC 24843) OX=284812 GN=mss116 PE=3 SV=1	59.449	34.2	235390	7	8116.8
O94362	Uncharacterized GTP-binding protein C428.15	SPBC428.15	32.236	739	sp|O94362|YHOF_SCHPO Uncharacterized GTP-binding protein C428.15 OS=Schizosaccharomyces pombe (strain 972 / ATCC 24843) OX=284812 GN=SPBC428.15 PE=3 SV=1	44.461	22.5	178290	5	8104
O42937	Probable coatomer subunit beta	sec27	98.581	350	sp|O42937|COPB2_SCHPO Probable coatomer subunit beta OS=Schizosaccharomyces pombe (strain 972 / ATCC 24843) OX=284812 GN=sec27 PE=3 SV=2	89.802	23.4	372510	7	8098.1
Q9UTF6	Cytochrome c oxidase subunit 6, mitochondrial	cox6	34.701	1769	sp|Q9UTF6|COX6_SCHPO Cytochrome c oxidase subunit 6, mitochondrial OS=Schizosaccharomyces pombe (strain 972 / ATCC 24843) OX=284812 GN=cox6 PE=3 SV=1	15.938	32.1	64023	2	8002.8
Q10195	Uncharacterized protein C11C11.06c	SPBC11C11.06c	20.105	1336	sp|Q10195|YBY6_SCHPO Uncharacterized protein C11C11.06c OS=Schizosaccharomyces pombe (strain 972 / ATCC 24843) OX=284812 GN=SPBC11C11.06c PE=4 SV=1	19.126	25.8	71617	2	7957.4
O74555	Branchpoint-bridging protein	bpb1	24.927	588	sp|O74555|BBP_SCHPO Branchpoint-bridging protein OS=Schizosaccharomyces pombe (strain 972 / ATCC 24843) OX=284812 GN=bpb1 PE=1 SV=1	63.621	11.2	135200	3	7953.2
O74483	U6 snRNA-associated Sm-like protein LSm8	lsm8	5.6093	563	sp|O74483|LSM8_SCHPO U6 snRNA-associated Sm-like protein LSm8 OS=Schizosaccharomyces pombe (strain 972 / ATCC 24843) OX=284812 GN=lsm8 PE=1 SV=1	10.563	17	55647	1	7949.6
O13813	Mitochondrial import receptor subunit tom22	tom22	7.3795	112	sp|O13813|TOM22_SCHPO Mitochondrial import receptor subunit tom22 OS=Schizosaccharomyces pombe (strain 972 / ATCC 24843) OX=284812 GN=tom22 PE=3 SV=1	15.912	5.6	39609	1	7921.8
Q9P7X1	Probable mitochondrial-processing peptidase subunit beta	qcr1	146.02	1624	sp|Q9P7X1|MPPB_SCHPO Probable mitochondrial-processing peptidase subunit beta OS=Schizosaccharomyces pombe (strain 972 / ATCC 24843) OX=284812 GN=qcr1 PE=2 SV=1	50.737	42.5	197960	4	7918.4
P08647	Ras-like protein 1	ras1	19.454	866	sp|P08647|RAS_SCHPO Ras-like protein 1 OS=Schizosaccharomyces pombe (strain 972 / ATCC 24843) OX=284812 GN=ras1 PE=1 SV=2	24.734	25.6	102740	2	7902.8
Q09330	mRNA export protein mlo3	mlo3	34.57	1183	sp|Q09330|MLO3_SCHPO mRNA export protein mlo3 OS=Schizosaccharomyces pombe (strain 972 / ATCC 24843) OX=284812 GN=mlo3 PE=1 SV=1	21.791	40.2	94372	3	7864.3
P87128	Probable eukaryotic translation initiation factor 3 subunit J	SPAC3A12.13c	92.475	1120	sp|P87128|EIF3J_SCHPO Probable eukaryotic translation initiation factor 3 subunit J OS=Schizosaccharomyces pombe (strain 972 / ATCC 24843) OX=284812 GN=SPAC3A12.13c PE=1 SV=2	30.532	28.5	125770	3	7860.6
P87157	Probable ADP-ribosylation factor-binding protein C25H2.16c	SPBC25H2.16c	37.684	1131	sp|P87157|YB0G_SCHPO Probable ADP-ribosylation factor-binding protein C25H2.16c OS=Schizosaccharomyces pombe (strain 972 / ATCC 24843) OX=284812 GN=SPBC25H2.16c PE=1 SV=1	59.481	26.1	172720	4	7850.7
Q9P7S2	Probable 26S proteasome regulatory subunit rpn6	rpn6	49.806	1608	sp|Q9P7S2|RPN6_SCHPO Probable 26S proteasome regulatory subunit rpn6 OS=Schizosaccharomyces pombe (strain 972 / ATCC 24843) OX=284812 GN=rpn6 PE=3 SV=1	47.341	29.7	156270	4	7813.6
O13849	Carboxypeptidase Y	cpy1	237.78	124	sp|O13849|CBPY_SCHPO Carboxypeptidase Y OS=Schizosaccharomyces pombe (strain 972 / ATCC 24843) OX=284812 GN=cpy1 PE=1 SV=1	114.24	22.9	256580	9	7775.2
Q9UUB1	6,7-dimethyl-8-ribityllumazine synthase	rib4	22.678	1819	sp|Q9UUB1|RIB4_SCHPO 6,7-dimethyl-8-ribityllumazine synthase OS=Schizosaccharomyces pombe (strain 972 / ATCC 24843) OX=284812 GN=rib4 PE=1 SV=1	17.188	35.2	69634	1	7737.2
Q9Y7J6	Serine/threonine-protein kinase ppk21	ppk21	20.697	1860	sp|Q9Y7J6|PPK21_SCHPO Serine/threonine-protein kinase ppk21 OS=Schizosaccharomyces pombe (strain 972 / ATCC 24843) OX=284812 GN=ppk21 PE=1 SV=3	62.715	13.2	223390	3	7703
O74969	High-affinity glucose transporter ght2	ght2	48.432	682	sp|O74969|GHT2_SCHPO High-affinity glucose transporter ght2 OS=Schizosaccharomyces pombe (strain 972 / ATCC 24843) OX=284812 GN=ght2 PE=1 SV=1	58.845	9.8	130850	3	7696.9
P36621	Adenylyl cyclase-associated protein	cap1	30.628	972	sp|P36621|CAP_SCHPO Adenylyl cyclase-associated protein OS=Schizosaccharomyces pombe (strain 972 / ATCC 24843) OX=284812 GN=cap1 PE=1 SV=1	60.243	18.1	228990	3	7633.1
P79016	40S ribosomal protein S19-B	rps19b	5.7246	1096	sp|P79016|RS19B_SCHPO 40S ribosomal protein S19-B OS=Schizosaccharomyces pombe (strain 972 / ATCC 24843) OX=284812 GN=rps1902 PE=3 SV=2	16.062	37.8	68640	4	7626.7
Q9HFF0	MICOS complex subunit mic10	mic10	9.5848	1500	sp|Q9HFF0|MIC10_SCHPO MICOS complex subunit mic10 OS=Schizosaccharomyces pombe (strain 972 / ATCC 24843) OX=284812 GN=mic10 PE=3 SV=1	9.3085	17.4	30256	1	7564
P40903	Sexual differentiation process putative subtilase-type proteinase isp6	isp6	23.148	1000	sp|P40903|ISP6_SCHPO Sexual differentiation process putative subtilase-type proteinase isp6 OS=Schizosaccharomyces pombe (strain 972 / ATCC 24843) OX=284812 GN=isp6 PE=2 SV=1	49.366	13.5	82829	2	7529.9
A9ZLL8	Protein lsd90	lsd90	13.821	2	sp|A9ZLL8|LSD90_SCHPO Protein lsd90 OS=Schizosaccharomyces pombe (strain 972 / ATCC 24843) OX=284812 GN=lsd90 PE=1 SV=1	82.323	11.5	344900	6	7497.7
Q09671	Putative NADPH dehydrogenase C5H10.10	SPAC5H10.10	36.524	1186	sp|Q09671|OYEB_SCHPO Putative NADPH dehydrogenase C5H10.10 OS=Schizosaccharomyces pombe (strain 972 / ATCC 24843) OX=284812 GN=SPAC5H10.10 PE=3 SV=1	44.983	13	163500	3	7432
O42940	Inorganic phosphate transport protein pho88	pho88	10.426	353	sp|O42940|PHO88_SCHPO SRP-independent targeting protein 3 homolog OS=Schizosaccharomyces pombe (strain 972 / ATCC 24843) OX=284812 GN=pho88 PE=3 SV=2	21.964	30.9	73718	1	7371.8
O42894	Exosome complex component rrp46	rrp46	15.826	329	sp|O42894|RRP46_SCHPO Exosome complex component rrp46 OS=Schizosaccharomyces pombe (strain 972 / ATCC 24843) OX=284812 GN=rrp46 PE=3 SV=1	24.926	21.2	80646	2	7331.5
O43049	Serine/threonine-protein phosphatase T	ppt1	41.408	382	sp|O43049|PPT1_SCHPO Serine/threonine-protein phosphatase T OS=Schizosaccharomyces pombe (strain 972 / ATCC 24843) OX=284812 GN=ppt1 PE=3 SV=2	53.29	14.8	167470	3	7281.4
P56287	Probable translation initiation factor eIF-2B subunit epsilon	tif225	107.25	1048	sp|P56287|EI2BE_SCHPO Probable translation initiation factor eIF-2B subunit epsilon OS=Schizosaccharomyces pombe (strain 972 / ATCC 24843) OX=284812 GN=tif225 PE=1 SV=1	76.325	30.4	232520	6	7266.3
Q9P7I0	Ankyrin repeat-containing protein C105.02c	SPAC105.02c	52.133	1589	sp|Q9P7I0|YIT2_SCHPO Ankyrin repeat-containing protein C105.02c OS=Schizosaccharomyces pombe (strain 972 / ATCC 24843) OX=284812 GN=SPAC105.02c PE=4 SV=1	18.557	31.8	58083	2	7260.4
P11620	GTP-binding protein ypt1	ypt1	54.071	890	sp|P11620|YPT1_SCHPO GTP-binding protein ypt1 OS=Schizosaccharomyces pombe (strain 972 / ATCC 24843) OX=284812 GN=ypt1 PE=1 SV=2	22.816	57.6	101490	4	7249.3
Q9P7J8	Serine/threonine-protein kinase gad8	gad8	12.465	1591	sp|Q9P7J8|GAD8_SCHPO Serine/threonine-protein kinase gad8 OS=Schizosaccharomyces pombe (strain 972 / ATCC 24843) OX=284812 GN=gad8 PE=1 SV=1	63.769	10.7	181130	3	7245.4
O42887	Putative agmatinase 2	SPBC8E4.03	25.978	325	sp|O42887|SPEB2_SCHPO Putative agmatinase 2 OS=Schizosaccharomyces pombe (strain 972 / ATCC 24843) OX=284812 GN=SPBC8E4.03 PE=3 SV=1	45.901	16	137440	3	7233.9
O94363	GTP-binding protein rhb1	rhb1	26.516	740	sp|O94363|RHB1_SCHPO GTP-binding protein rhb1 OS=Schizosaccharomyces pombe (strain 972 / ATCC 24843) OX=284812 GN=rhb1 PE=3 SV=1	20.515	34.6	93855	2	7219.6
O74865	Diphthine methyltransferase	rrt2	35.878	643	sp|O74865|DPH7_SCHPO Diphthine methyltransferase OS=Schizosaccharomyces pombe (strain 972 / ATCC 24843) OX=284812 GN=rrt2 PE=3 SV=2	37.04	21.8	151560	3	7217.2
O14361	Putative prephenate dehydratase	pha2	13.221	281	sp|O14361|PHA2_SCHPO Putative prephenate dehydratase OS=Schizosaccharomyces pombe (strain 972 / ATCC 24843) OX=284812 GN=pha2 PE=3 SV=2	29.871	18	114610	2	7163.1
O13838	Nucleoporin nup40	nup40	20.759	119	sp|O13838|NUP40_SCHPO Nucleoporin nup40 OS=Schizosaccharomyces pombe (strain 972 / ATCC 24843) OX=284812 GN=nup40 PE=1 SV=1	40.254	16.4	114010	3	7125.9
Q92344	Kinetochore protein fta5	fta5	17.845	1444	sp|Q92344|PFL8_SCHPO Putative cell agglutination protein pfl8 OS=Schizosaccharomyces pombe (strain 972 / ATCC 24843) OX=284812 GN=pfl8 PE=1 SV=1	41	12.7	85403	1	7116.9
Q09785	Putative glycine dehydrogenase (decarboxylating), mitochondrial	gcv2	81.612	1232	sp|Q09785|GCSP_SCHPO Putative glycine dehydrogenase (decarboxylating), mitochondrial OS=Schizosaccharomyces pombe (strain 972 / ATCC 24843) OX=284812 GN=gcv2 PE=3 SV=2	114.23	29.2	368230	10	7081.3
Q09744	Uncharacterized FAD-binding protein C12C2.03c	SPBC12C2.03c	21.573	1213	sp|Q09744|YB63_SCHPO Uncharacterized FAD-binding protein C12C2.03c OS=Schizosaccharomyces pombe (strain 972 / ATCC 24843) OX=284812 GN=SPBC12C2.03c PE=3 SV=1	63.976	22.6	210460	4	7015.5
O74135	Casein kinase I homolog 3	cki3	20.675	498	sp|O74135|CKI3_SCHPO Casein kinase I homolog 3 OS=Schizosaccharomyces pombe (strain 972 / ATCC 24843) OX=284812 GN=cki3 PE=3 SV=1	50.214	18	181930	5	6997.4
Q09722	Eukaryotic translation initiation factor 3 subunit M	eif3m	25.716	1204	sp|Q09722|EIF3M_SCHPO Eukaryotic translation initiation factor 3 subunit M OS=Schizosaccharomyces pombe (strain 972 / ATCC 24843) OX=284812 GN=eif3m PE=1 SV=2	45.085	16.4	132790	2	6988.8
O74352	Protein hob1	hob1	33.466	517	sp|O74352|HOB1_SCHPO Protein hob1 OS=Schizosaccharomyces pombe (strain 972 / ATCC 24843) OX=284812 GN=hob1 PE=1 SV=1	51.391	17.2	110250	5	6890.8
P36600	cAMP-dependent protein kinase regulatory subunit	cgs1	24.465	961	sp|P36600|KAPR_SCHPO cAMP-dependent protein kinase regulatory subunit OS=Schizosaccharomyces pombe (strain 972 / ATCC 24843) OX=284812 GN=cgs1 PE=1 SV=2	46.468	12.6	130600	3	6873.6
Q09720	Probable proteasome subunit beta type-4	SPAC31A2.04c	4.6321	1203	sp|Q09720|PSB4_SCHPO Probable proteasome subunit beta type-4 OS=Schizosaccharomyces pombe (strain 972 / ATCC 24843) OX=284812 GN=SPAC31A2.04c PE=3 SV=1	21.967	14.4	54887	2	6860.9
O59778	Biotin synthase	bio2	36.523	429	sp|O59778|BIOB_SCHPO Biotin synthase OS=Schizosaccharomyces pombe (strain 972 / ATCC 24843) OX=284812 GN=bio2 PE=1 SV=1	40.65	16.5	102790	1	6852.7
Q9UU89	Inosine triphosphate pyrophosphatase	SPCC830.10	15.067	1813	sp|Q9UU89|ITPA_SCHPO Inosine triphosphate pyrophosphatase OS=Schizosaccharomyces pombe (strain 972 / ATCC 24843) OX=284812 GN=SPCC830.10 PE=3 SV=1	20.978	26.6	81876	2	6823
P05752	40S ribosomal protein S6-A	rps6a	5.7681	857	sp|P05752|RS6A_SCHPO 40S ribosomal protein S6-A OS=Schizosaccharomyces pombe (strain 972 / ATCC 24843) OX=284812 GN=rps601 PE=1 SV=2	27.499	56.9	61324	13	6813.8
Q10434	F-actin-capping protein subunit alpha	acp1	30.582	1400	sp|Q10434|CAPZA_SCHPO F-actin-capping protein subunit alpha OS=Schizosaccharomyces pombe (strain 972 / ATCC 24843) OX=284812 GN=acp1 PE=1 SV=1	29.808	27.7	101900	3	6793.5
G2TRQ6	Uncharacterized protein tam11	tam11	7.0358	47	sp|G2TRQ6|TAM11_SCHPO Uncharacterized protein tam11 OS=Schizosaccharomyces pombe (strain 972 / ATCC 24843) OX=284812 GN=tam11 PE=1 SV=1	6.9346	19.4	27013	1	6753.3
O94369	Uncharacterized protein C1604.03c	SPBC1604.03c	8.2838	742	sp|O94369|YG03_SCHPO Uncharacterized protein C1604.03c OS=Schizosaccharomyces pombe (strain 972 / ATCC 24843) OX=284812 GN=SPBC1604.03c PE=4 SV=1	37.372	7.6	86157	2	6627.5
Q09850	Putative endo-1,3(4)-beta-glucanase 2	eng2	40.205	1255	sp|Q09850|ENG2_SCHPO Ascus wall endo-1,3(4)-beta-glucanase OS=Schizosaccharomyces pombe (strain 972 / ATCC 24843) OX=284812 GN=eng2 PE=1 SV=1	77.947	17.6	184640	4	6594.4
Q96WV0	Uncharacterized urease accessory protein ureG-like	SPCPB16A4.05c	31.77	1460	sp|Q96WV0|UREG_SCHPO Uncharacterized urease accessory protein ureG-like OS=Schizosaccharomyces pombe (strain 972 / ATCC 24843) OX=284812 GN=SPCPB16A4.05c PE=3 SV=1	31.33	28.3	85380	4	6567.7
O94404	Protein NIF3 homolog	SPCC126.12	27.708	754	sp|O94404|NIF3_SCHPO Protein NIF3 homolog OS=Schizosaccharomyces pombe (strain 972 / ATCC 24843) OX=284812 GN=SPCC126.12 PE=3 SV=1	29.85	11.5	71883	2	6534.8
Q9UUB4	Phosphoribosylaminoimidazole-succinocarboxamide synthase	ade7	92.968	1820	sp|Q9UUB4|PUR7_SCHPO Phosphoribosylaminoimidazole-succinocarboxamide synthase OS=Schizosaccharomyces pombe (strain 972 / ATCC 24843) OX=284812 GN=ade7 PE=3 SV=1	33.913	48.5	136980	3	6522.8
O14082	Uncharacterized protein UNK4.17		22.114	199	sp|O14082|YEAH_SCHPO Uncharacterized protein UNK4.17 OS=Schizosaccharomyces pombe (strain 972 / ATCC 24843) OX=284812 GN=SPAC2E11.17 PE=4 SV=2	45.755	24.1	168970	5	6499
Q9UTC5	Putative uridine kinase C227.14	SPAC227.14	2.5165	1759	sp|Q9UTC5|YIDE_SCHPO Putative uridine kinase C227.14 OS=Schizosaccharomyces pombe (strain 972 / ATCC 24843) OX=284812 GN=SPAC227.14 PE=3 SV=1	26.619	12.8	84291	2	6483.9
O14179	Ribosome maturation protein sdo1	sdo1	25.544	226	sp|O14179|SDO1_SCHPO Ribosome maturation protein sdo1 OS=Schizosaccharomyces pombe (strain 972 / ATCC 24843) OX=284812 GN=sdo1 PE=3 SV=1	28.075	28.9	103540	4	6471.4
Q10322	Probable E3 ubiquitin-protein ligase dma1	dma1	2.4831	1378	sp|Q10322|DMA1_SCHPO Probable E3 ubiquitin-protein ligase dma1 OS=Schizosaccharomyces pombe (strain 972 / ATCC 24843) OX=284812 GN=dma1 PE=1 SV=1	30.597	14.6	77573	2	6464.4
Q9UUI1	U6 snRNA-associated Sm-like protein LSm6	lsm6	9.2709	1842	sp|Q9UUI1|LSM6_SCHPO U6 snRNA-associated Sm-like protein LSm6 OS=Schizosaccharomyces pombe (strain 972 / ATCC 24843) OX=284812 GN=lsm6 PE=1 SV=1	8.3364	21.3	38509	1	6418.2
O74523	Putative ATPase inhibitor, mitochondrial	inh1	3.5196	576	sp|O74523|ATIF_SCHPO Putative ATPase inhibitor, mitochondrial OS=Schizosaccharomyces pombe (strain 972 / ATCC 24843) OX=284812 GN=inh1 PE=3 SV=1	10.674	32.2	25655	1	6413.7
Q9UUC2	CRAL-TRIO domain-containing protein C365.01	SPBC365.01	27.835	1823	sp|Q9UUC2|YGR1_SCHPO CRAL-TRIO domain-containing protein C365.01 OS=Schizosaccharomyces pombe (strain 972 / ATCC 24843) OX=284812 GN=SPBC365.01 PE=2 SV=1	41.015	34.1	153580	3	6399.4
Q9UTA8	Uncharacterized methyltransferase-like C25B8.10	SPAC25B8.10	2.557	1755	sp|Q9UTA8|YL8A_SCHPO Uncharacterized methyltransferase-like C25B8.10 OS=Schizosaccharomyces pombe (strain 972 / ATCC 24843) OX=284812 GN=SPAC25B8.10 PE=3 SV=1	29.376	7.8	89589	2	6399.2
Q09191	DNA-directed RNA polymerases I, II, and III subunit RPABC1	rpb5	7.577	1179	sp|Q09191|RPAB1_SCHPO DNA-directed RNA polymerases I, II, and III subunit RPABC1 OS=Schizosaccharomyces pombe (strain 972 / ATCC 24843) OX=284812 GN=rpb5 PE=1 SV=1	23.915	16.7	70050	2	6368.2
O42928	Uncharacterized protein C16C6.04	SPBC16C6.04	23.576	344	sp|O42928|YBD4_SCHPO Uncharacterized protein C16C6.04 OS=Schizosaccharomyces pombe (strain 972 / ATCC 24843) OX=284812 GN=SPBC16C6.04 PE=4 SV=1	38.762	19.7	101710	2	6356.6
O74763	Uncharacterized WD repeat-containing protein C17D11.08	SPBC17D11.08	26.903	607	sp|O74763|YBE8_SCHPO Uncharacterized WD repeat-containing protein C17D11.08 OS=Schizosaccharomyces pombe (strain 972 / ATCC 24843) OX=284812 GN=SPBC17D11.08 PE=1 SV=1	47.742	24.8	133260	4	6345.7
O94425	WW domain-containing protein C660.05	SPBC660.05	4.0544	761	sp|O94425|YHK5_SCHPO WW domain-containing protein C660.05 OS=Schizosaccharomyces pombe (strain 972 / ATCC 24843) OX=284812 GN=SPBC660.05 PE=4 SV=1	15.134	14	31370	1	6274.1
P14965	Orotidine 5-phosphate decarboxylase	ura4	17.172	893	sp|P14965|PYRF_SCHPO Orotidine 5-phosphate decarboxylase OS=Schizosaccharomyces pombe (strain 972 / ATCC 24843) OX=284812 GN=ura4 PE=3 SV=1	29.361	28.8	124820	3	6241
Q9Y7Z8	Myosin-1	myo1	101.87	1894	sp|Q9Y7Z8|MYO1_SCHPO Myosin-1 OS=Schizosaccharomyces pombe (strain 972 / ATCC 24843) OX=284812 GN=myo1 PE=1 SV=1	135.71	21.9	445700	8	6190.3
Q9USK8	Cell wall alpha-1,3-glucan synthase ags1	ags1	93.577	1683	sp|Q9USK8|AGS1_SCHPO Cell wall alpha-1,3-glucan synthase ags1 OS=Schizosaccharomyces pombe (strain 972 / ATCC 24843) OX=284812 GN=ags1 PE=1 SV=3	272.1	11.9	548580	12	6163.9
Q09898	Serine/threonine-protein kinase sid2	sid2	19.999	1272	sp|Q09898|SID2_SCHPO Serine/threonine-protein kinase sid2 OS=Schizosaccharomyces pombe (strain 972 / ATCC 24843) OX=284812 GN=sid2 PE=1 SV=1	70.491	14	178720	5	6162.7
Q10209	Uncharacterized J domain-containing protein C4H3.01	SPAC4H3.01	27.507	1342	sp|Q10209|YAY1_SCHPO Uncharacterized J domain-containing protein C4H3.01 OS=Schizosaccharomyces pombe (strain 972 / ATCC 24843) OX=284812 GN=SPAC4H3.01 PE=1 SV=1	44.768	23.2	147850	3	6160.5
O74524	Probable proline dehydrogenase, mitochondrial	SPCC70.03c	84.525	577	sp|O74524|PROD_SCHPO Probable proline dehydrogenase, mitochondrial OS=Schizosaccharomyces pombe (strain 972 / ATCC 24843) OX=284812 GN=SPCC70.03c PE=3 SV=1	55.812	43.3	177770	5	6130
O74417	Uncharacterized protein C14G10.04	SPCC14G10.04	23.014	537	sp|O74417|YJL4_SCHPO Uncharacterized protein C14G10.04 OS=Schizosaccharomyces pombe (strain 972 / ATCC 24843) OX=284812 GN=SPCC14G10.04 PE=1 SV=1	52.624	17.5	153150	4	6125.9
O14008	Myosin 1 light chain cam2	cam2	38.604	170	sp|O14008|CAM2_SCHPO Myosin 1 light chain cam2 OS=Schizosaccharomyces pombe (strain 972 / ATCC 24843) OX=284812 GN=cam2 PE=1 SV=1	16.218	36.4	55093	2	6121.4
Q9Y809	N-terminal acetyltransferase B complex subunit arm1	arm1	42.13	1896	sp|Q9Y809|NAA25_SCHPO N-terminal acetyltransferase B complex subunit arm1 OS=Schizosaccharomyces pombe (strain 972 / ATCC 24843) OX=284812 GN=arm1 PE=3 SV=1	92.456	17.5	275470	7	6121.4
O43028	Vacuolar protein 8	vac8	88.871	373	sp|O43028|VAC8_SCHPO Vacuolar protein 8 OS=Schizosaccharomyces pombe (strain 972 / ATCC 24843) OX=284812 GN=vac8 PE=1 SV=4	60.232	16.4	171370	4	6120.2
Q9URZ3	Probable proline-specific permease put4	put4	16.986	1652	sp|Q9URZ3|PUT4_SCHPO Probable proline-specific permease put4 OS=Schizosaccharomyces pombe (strain 972 / ATCC 24843) OX=284812 GN=put4 PE=3 SV=1	61.119	14.7	60807	2	6080.7
Q10253	Meiotically up-regulated gene 64 protein	mug64	83.783	1356	sp|Q10253|MUG64_SCHPO Meiotically up-regulated gene 64 protein OS=Schizosaccharomyces pombe (strain 972 / ATCC 24843) OX=284812 GN=mug64 PE=1 SV=3	31.747	50.3	103030	4	6060.7
Q9USR1	Thioredoxin-like protein 1	txl1	40.791	1697	sp|Q9USR1|TXL1_SCHPO Thioredoxin-like protein 1 OS=Schizosaccharomyces pombe (strain 972 / ATCC 24843) OX=284812 GN=txl1 PE=4 SV=1	31.889	30	96745	4	6046.6
Q10113	Microtubule integrity protein mal3	mal3	8.452	1306	sp|Q10113|MAL3_SCHPO Microtubule integrity protein mal3 OS=Schizosaccharomyces pombe (strain 972 / ATCC 24843) OX=284812 GN=mal3 PE=1 SV=1	35.094	15.3	78576	2	6044.3
O74976	Putative peroxisomal-coenzyme A synthetase	SPCC1827.03c	17.851	685	sp|O74976|FAT2_SCHPO Oxalate--CoA ligase OS=Schizosaccharomyces pombe (strain 972 / ATCC 24843) OX=284812 GN=pcs60 PE=1 SV=1	56.274	11.3	156620	3	6023.9
P32235	GTP-binding protein 1	gtp1	19.825	938	sp|P32235|GTP1_SCHPO GTP-binding protein 1 OS=Schizosaccharomyces pombe (strain 972 / ATCC 24843) OX=284812 GN=gtp1 PE=3 SV=2	40.848	21.4	149990	4	5999.6
Q10097	Uncharacterized transporter C11D3.18C	SPAC11D3.18c	37.552	1299	sp|Q10097|YAOI_SCHPO Uncharacterized transporter C11D3.18C OS=Schizosaccharomyces pombe (strain 972 / ATCC 24843) OX=284812 GN=SPAC11D3.18c PE=3 SV=1	55.351	9.6	101340	3	5961.4
Q09899	Porphobilinogen deaminase	hem3	35.23	1273	sp|Q09899|HEM3_SCHPO Porphobilinogen deaminase OS=Schizosaccharomyces pombe (strain 972 / ATCC 24843) OX=284812 GN=hem3 PE=1 SV=2	36.826	7.7	107010	2	5944.8
O59682	Serine palmitoyltransferase 1	lcb1	55.136	408	sp|O59682|LCB1_SCHPO Serine palmitoyltransferase 1 OS=Schizosaccharomyces pombe (strain 972 / ATCC 24843) OX=284812 GN=lcb1 PE=3 SV=1	57.468	19.4	141940	3	5914.3
Q09196	Myosin regulatory light chain cdc4	cdc4	10.805	1181	sp|Q09196|MLR4_SCHPO Myosin regulatory light chain cdc4 OS=Schizosaccharomyces pombe (strain 972 / ATCC 24843) OX=284812 GN=cdc4 PE=1 SV=1	15.661	39.7	53192	2	5910.2
Q9URY5	Flavohemoprotein	SPAC869.02c	19.021	1650	sp|Q9URY5|FHP_SCHPO Flavohemoprotein OS=Schizosaccharomyces pombe (strain 972 / ATCC 24843) OX=284812 GN=SPAC869.02c PE=3 SV=1	48.459	15.5	165440	4	5908.4
Q09171	Pyruvate dehydrogenase E1 component subunit beta, mitochondrial	pdb1	76.133	1169	sp|Q09171|ODPB_SCHPO Pyruvate dehydrogenase E1 component subunit beta, mitochondrial OS=Schizosaccharomyces pombe (strain 972 / ATCC 24843) OX=284812 GN=pdb1 PE=4 SV=1	39.623	48.9	94346	2	5896.6
O74927	Methylenetetrahydrofolate reductase 2	met11	27.891	668	sp|O74927|MTHR2_SCHPO Methylenetetrahydrofolate reductase 2 OS=Schizosaccharomyces pombe (strain 972 / ATCC 24843) OX=284812 GN=met11 PE=1 SV=2	72.139	19.5	224060	5	5896.4
O00102	Ubiquitin-conjugating enzyme E2-18 kDa	ubc7	37.548	53	sp|O00102|UBC7_SCHPO Ubiquitin-conjugating enzyme E2-18 kDa OS=Schizosaccharomyces pombe (strain 972 / ATCC 24843) OX=284812 GN=ubc7 PE=1 SV=2	18.72	21.7	29427	2	5885.4
O13685	Ubiquitin-conjugating enzyme E2 13	ubc13	8.6183	71	sp|O13685|UBC13_SCHPO Ubiquitin-conjugating enzyme E2 13 OS=Schizosaccharomyces pombe (strain 972 / ATCC 24843) OX=284812 GN=ubc13 PE=1 SV=1	16.855	26.4	52716	1	5857.3
O13846	Ceramide very long chain fatty acid hydroxylase-like protein C19G12.08	SPAC19G12.08	17.716	122	sp|O13846|SCS7_SCHPO Ceramide very long chain fatty acid hydroxylase scs7 OS=Schizosaccharomyces pombe (strain 972 / ATCC 24843) OX=284812 GN=scs7 PE=3 SV=1	40.229	15.6	81989	1	5856.4
O74943	Uncharacterized protein C553.06	SPCC553.06	9.1107	671	sp|O74943|YJB6_SCHPO Uncharacterized protein C553.06 OS=Schizosaccharomyces pombe (strain 972 / ATCC 24843) OX=284812 GN=SPCC553.06 PE=3 SV=1	29.329	3.7	58541	1	5854.1
Q10176	Dolichyl-diphosphooligosaccharide--protein glycosyltransferase subunit 1	ost1	31.408	1327	sp|Q10176|OST1_SCHPO Dolichyl-diphosphooligosaccharide--protein glycosyltransferase subunit 1 OS=Schizosaccharomyces pombe (strain 972 / ATCC 24843) OX=284812 GN=ost1 PE=3 SV=1	51.683	19.1	132010	2	5739.6
P78920	Putative nucleosome assembly protein C2D10.11C	SPBC2D10.11c	28.519	1084	sp|P78920|YGNB_SCHPO Putative nucleosome assembly protein C2D10.11C OS=Schizosaccharomyces pombe (strain 972 / ATCC 24843) OX=284812 GN=SPBC2D10.11c PE=2 SV=2	43.37	16.4	91737	3	5733.5
O59701	Cysteine synthase 1	cys11	91.481	410	sp|O59701|CYSK_SCHPO Cysteine synthase 1 OS=Schizosaccharomyces pombe (strain 972 / ATCC 24843) OX=284812 GN=cys11 PE=1 SV=1	37.853	39.9	91734	3	5733.4
Q8TFH0	Probable 6-phosphofructo-2-kinase PB17E12.14c	SPAPB17E12.14c	21.858	1436	sp|Q8TFH0|YIKE_SCHPO Probable 6-phosphofructo-2-kinase PB17E12.14c OS=Schizosaccharomyces pombe (strain 972 / ATCC 24843) OX=284812 GN=SPAPB17E12.14c PE=1 SV=2	76.392	13.6	189130	3	5731.2
O14141	Maf-like protein C3G6.03c	SPAC3G6.03c	17.429	219	sp|O14141|NTPPA_SCHPO dTTP/UTP pyrophosphatase OS=Schizosaccharomyces pombe (strain 972 / ATCC 24843) OX=284812 GN=SPAC3G6.03c PE=1 SV=2	26.894	21.6	74429	1	5725.3
Q9P7E8	Protein app1	app1	32.163	1580	sp|Q9P7E8|APP1_SCHPO Protein app1 OS=Schizosaccharomyces pombe (strain 972 / ATCC 24843) OX=284812 GN=app1 PE=2 SV=1	91.136	11.8	228600	7	5715
O94561	Peroxiredoxin C1773.02c	SPBC1773.02c	5.6438	798	sp|O94561|PRX_SCHPO Peroxiredoxin bcp1 OS=Schizosaccharomyces pombe (strain 972 / ATCC 24843) OX=284812 GN=bcp1 PE=1 SV=1	21.164	21	57135	2	5713.5
O74475	1,3-beta-glucan synthase component bgs4	bgs4	141.51	558	sp|O74475|BGS4_SCHPO 1,3-beta-glucan synthase component bgs4 OS=Schizosaccharomyces pombe (strain 972 / ATCC 24843) OX=284812 GN=bgs4 PE=1 SV=1	225.18	14.7	428180	9	5709.1
Q9P789	Pumilio domain-containing protein P35G2.14	SPBP35G2.14	53.976	1569	sp|Q9P789|YN8E_SCHPO Pumilio domain-containing protein P35G2.14 OS=Schizosaccharomyces pombe (strain 972 / ATCC 24843) OX=284812 GN=SPBP35G2.14 PE=1 SV=2	114.23	20.8	245210	7	5702.4
O94752	Enhancer of mRNA-decapping protein 3	edc3	23.243	847	sp|O94752|EDC3_SCHPO Enhancer of mRNA-decapping protein 3 OS=Schizosaccharomyces pombe (strain 972 / ATCC 24843) OX=284812 GN=edc3 PE=1 SV=1	49.218	7.7	113360	2	5668.2
Q9Y7P0	Riboflavin synthase	rib5	28.516	1872	sp|Q9Y7P0|RISA_SCHPO Riboflavin synthase OS=Schizosaccharomyces pombe (strain 972 / ATCC 24843) OX=284812 GN=rib5 PE=1 SV=1	22.861	27.9	62072	2	5642.9
Q9UT25	Uncharacterized N-acetyltransferase C9.02c	SPAC9.02c	49.685	1732	sp|Q9UT25|YFY2_SCHPO Uncharacterized N-acetyltransferase C9.02c OS=Schizosaccharomyces pombe (strain 972 / ATCC 24843) OX=284812 GN=SPAC9.02c PE=3 SV=1	18.791	78.2	61947	1	5631.5
P41878	26S proteasome regulatory subunit rpn11	rpn11	31.984	1012	sp|P41878|RPN11_SCHPO 26S proteasome regulatory subunit rpn11 OS=Schizosaccharomyces pombe (strain 972 / ATCC 24843) OX=284812 GN=rpn11 PE=1 SV=2	34.572	14.9	89518	2	5594.9
Q92353	Ubiquitin carboxyl-terminal hydrolase 6	ubp6	21.253	1447	sp|Q92353|UBP6_SCHPO Ubiquitin carboxyl-terminal hydrolase 6 OS=Schizosaccharomyces pombe (strain 972 / ATCC 24843) OX=284812 GN=ubp6 PE=1 SV=2	52.316	12.4	95031	2	5590.1
Q9US34	Uncharacterized aminotransferase C1039.07c	SPAC1039.07c	13.517	1662	sp|Q9US34|YFZ7_SCHPO Uncharacterized aminotransferase C1039.07c OS=Schizosaccharomyces pombe (strain 972 / ATCC 24843) OX=284812 GN=SPAC1039.07c PE=3 SV=1	48.445	14.7	117300	3	5585.5
O74429	Inositol hexakisphosphate and diphosphoinositol-pentakisphosphate kinase	asp1	52.704	543	sp|O74429|VIP1_SCHPO Inositol hexakisphosphate and diphosphoinositol-pentakisphosphate kinase OS=Schizosaccharomyces pombe (strain 972 / ATCC 24843) OX=284812 GN=asp1 PE=1 SV=1	105.68	19.6	295150	6	5568.8
O59667	Histidine biosynthesis bifunctional protein his7;Phosphoribosyl-AMP cyclohydrolase;Phosphoribosyl-ATP pyrophosphatase	his7	44.046	399	sp|O59667|HIS2_SCHPO Histidine biosynthesis bifunctional protein his7 OS=Schizosaccharomyces pombe (strain 972 / ATCC 24843) OX=284812 GN=his7 PE=3 SV=1	46.182	17.5	105110	3	5532.1
Q9C0U6	Xylulose kinase	xks1	31.149	1466	sp|Q9C0U6|XKS1_SCHPO Xylulose kinase OS=Schizosaccharomyces pombe (strain 972 / ATCC 24843) OX=284812 GN=xks1 PE=3 SV=1	61.682	13	180850	4	5480.2
O74416	Probable proteasome maturation factor ump1	ump1	2.8212	536	sp|O74416|UMP1_SCHPO Probable proteasome maturation factor ump1 OS=Schizosaccharomyces pombe (strain 972 / ATCC 24843) OX=284812 GN=ump1 PE=3 SV=1	14.661	17.8	38254	1	5464.9
O94523	Probable acyl-CoA desaturase	SPCC1281.06c	215.83	789	sp|O94523|ACO1_SCHPO Probable acyl-CoA desaturase OS=Schizosaccharomyces pombe (strain 972 / ATCC 24843) OX=284812 GN=SPCC1281.06c PE=3 SV=1	54.438	51.1	114730	6	5463.1
Q9HE08	Methylthioribulose-1-phosphate dehydratase	mde1	15.152	1496	sp|Q9HE08|MTNB_SCHPO Methylthioribulose-1-phosphate dehydratase OS=Schizosaccharomyces pombe (strain 972 / ATCC 24843) OX=284812 GN=mde1 PE=3 SV=2	25.849	12.7	38062	2	5437.4
P50998	AMP deaminase	ada1	34.055	1038	sp|P50998|AMPD_SCHPO AMP deaminase OS=Schizosaccharomyces pombe (strain 972 / ATCC 24843) OX=284812 GN=ada1 PE=1 SV=3	95.886	14.3	232740	6	5412.6
Q9P6P3	Serine/threonine-protein kinase ppk15	ppk15	28.962	1547	sp|Q9P6P3|PPK15_SCHPO Serine/threonine-protein kinase ppk15 OS=Schizosaccharomyces pombe (strain 972 / ATCC 24843) OX=284812 GN=ppk15 PE=1 SV=1	61.49	15.5	162330	4	5411
Q09329	Protein mlo2	mlo2	10.312	1182	sp|Q09329|MLO2_SCHPO Protein mlo2 OS=Schizosaccharomyces pombe (strain 972 / ATCC 24843) OX=284812 GN=mlo2 PE=2 SV=1	38.078	11.6	91502	2	5382.4
O74333	Non-classical export protein 2 homolog	fhn1	8.1837	513	sp|O74333|NCE2_SCHPO Non-classical export protein 2 homolog OS=Schizosaccharomyces pombe (strain 972 / ATCC 24843) OX=284812 GN=fhn1 PE=3 SV=1	20.273	12.6	42923	1	5365.4
Q9P7K9	Putative aldehyde dehydrogenase-like protein C21C3	SPBC21C3.15c	75.871	1596	sp|Q9P7K9|YOSF_SCHPO Putative aldehyde dehydrogenase-like protein C21C3 OS=Schizosaccharomyces pombe (strain 972 / ATCC 24843) OX=284812 GN=SPBC21C3.15c PE=3 SV=1	57.571	24.5	128750	4	5364.5
Q9HDY2	Meiotically up-regulated protein PB1A10.08	SPAPB1A10.08	17.004	1490	sp|Q9HDY2|YK18_SCHPO Meiotically up-regulated protein PB1A10.08 OS=Schizosaccharomyces pombe (strain 972 / ATCC 24843) OX=284812 GN=SPAPB1A10.08 PE=4 SV=2	46.788	14.7	80187	2	5345.8
Q9USX8	U2 small nuclear ribonucleoprotein A	lea1	9.16	1714	sp|Q9USX8|RU2A_SCHPO U2 small nuclear ribonucleoprotein A OS=Schizosaccharomyces pombe (strain 972 / ATCC 24843) OX=284812 GN=lea1 PE=1 SV=1	27.228	26.4	63735	1	5311.2
Q9UUH1	Vacuolar protein sorting-associated protein 55	vps55	1.6083	1838	sp|Q9UUH1|VPS55_SCHPO Vacuolar protein sorting-associated protein 55 OS=Schizosaccharomyces pombe (strain 972 / ATCC 24843) OX=284812 GN=vps55 PE=3 SV=2	14.096	15.6	20974	1	5243.5
Q9URZ5	Vacuolar protein sorting-associated protein 1	vps1	25.686	1653	sp|Q9URZ5|VPS1_SCHPO Vacuolar protein sorting-associated protein 1 OS=Schizosaccharomyces pombe (strain 972 / ATCC 24843) OX=284812 GN=vps1 PE=3 SV=2	75.79	10.3	199150	4	5240.8
O59779	Uncharacterized protein C1235.01		5.2773	430	sp|O59779|YCY1_SCHPO Uncharacterized protein C1235.01 OS=Schizosaccharomyces pombe (strain 972 / ATCC 24843) OX=284812 GN=SPCC1235.01 PE=4 SV=1	69.695	4	31271	1	5211.9
P48009	Septin homolog spn4	spn4	28.985	1023	sp|P48009|SPN4_SCHPO Septin homolog spn4 OS=Schizosaccharomyces pombe (strain 972 / ATCC 24843) OX=284812 GN=spn4 PE=1 SV=1	44.773	23.2	88307	3	5194.5
Q9UTL3	Ribose-5-phosphate isomerase	rki1	11.824	1788	sp|Q9UTL3|RPIA_SCHPO Ribose-5-phosphate isomerase OS=Schizosaccharomyces pombe (strain 972 / ATCC 24843) OX=284812 GN=rki1 PE=3 SV=1	29.329	31.8	82575	1	5160.9
Q9UUI8	Uncharacterized transporter C22F8.04	SPAC22F8.04	4.6223	1845	sp|Q9UUI8|YIY4_SCHPO Uncharacterized transporter C22F8.04 OS=Schizosaccharomyces pombe (strain 972 / ATCC 24843) OX=284812 GN=SPAC22F8.04 PE=3 SV=1	42.626	7.3	103100	1	5155
O94281	Probable casein kinase II subunit beta-2	SPBC2G5.02c	30.743	707	sp|O94281|CSK2C_SCHPO Probable casein kinase II subunit beta-2 OS=Schizosaccharomyces pombe (strain 972 / ATCC 24843) OX=284812 GN=SPBC2G5.02c PE=3 SV=1	29.061	44.1	55913	1	5083
Q1MTN8	UPF0661 TPR repeat-containing protein C16D10.01c	SPBC16D10.01c	24.129	1427	sp|Q1MTN8|ACL4_SCHPO Probable assembly chaperone of rpl4 OS=Schizosaccharomyces pombe (strain 972 / ATCC 24843) OX=284812 GN=SPBC16D10.01c PE=3 SV=2	38.108	9.2	71043	2	5074.5
Q92399	DNA-directed RNA polymerases I, II, and III subunit RPABC3	rpb8	14.294	1458	sp|Q92399|RPAB3_SCHPO DNA-directed RNA polymerases I, II, and III subunit RPABC3 OS=Schizosaccharomyces pombe (strain 972 / ATCC 24843) OX=284812 GN=rpb8 PE=1 SV=2	14.3	18.4	30414	1	5068.9
Q09116	Septin homolog spn2	spn2	26.988	1164	sp|Q09116|SPN2_SCHPO Septin homolog spn2 OS=Schizosaccharomyces pombe (strain 972 / ATCC 24843) OX=284812 GN=spn2 PE=1 SV=2	38.129	13.6	101300	2	5065.2
P87051	Peptidyl-prolyl cis-trans isomerase ppi1	ppi1	9.5661	1107	sp|P87051|PPIL1_SCHPO Peptidyl-prolyl cis-trans isomerase ppi1 OS=Schizosaccharomyces pombe (strain 972 / ATCC 24843) OX=284812 GN=ppi1 PE=1 SV=1	16.864	25.8	35302	1	5043.2
P35669	Glutathione synthetase large chain	gsa1	14.798	946	sp|P35669|GSHB_SCHPO Glutathione synthetase large chain OS=Schizosaccharomyces pombe (strain 972 / ATCC 24843) OX=284812 GN=gsa1 PE=1 SV=2	56.152	19.5	161090	4	5034
O60079	Probable ubiquitin carboxyl-terminal hydrolase 12	ubp12	57.846	461	sp|O60079|UBP12_SCHPO Probable ubiquitin carboxyl-terminal hydrolase 12 OS=Schizosaccharomyces pombe (strain 972 / ATCC 24843) OX=284812 GN=ubp12 PE=1 SV=1	111.97	20	246570	8	5032.1
O14063	Importin subunit alpha-1	cut15	27.902	191	sp|O14063|IMA1_SCHPO Importin subunit alpha-1 OS=Schizosaccharomyces pombe (strain 972 / ATCC 24843) OX=284812 GN=cut15 PE=1 SV=1	60.425	11.8	100060	3	5003.2
O36023	Septin homolog spn1	spn1	60.228	297	sp|O36023|SPN1_SCHPO Septin homolog spn1 OS=Schizosaccharomyces pombe (strain 972 / ATCC 24843) OX=284812 GN=spn1 PE=1 SV=2	53.737	13	114770	3	4989.8
Q9USU7	HMG box-containing protein C28F2.11	SPBC28F2.11	22.573	1708	sp|Q9USU7|YHHB_SCHPO HMG box-containing protein C28F2.11 OS=Schizosaccharomyces pombe (strain 972 / ATCC 24843) OX=284812 GN=SPBC28F2.11 PE=1 SV=1	33.891	19.4	94679	3	4983.1
O14349	IMP-specific 5-nucleotidase 1	isn1	33.977	276	sp|O14349|ISN1_SCHPO IMP-specific 5-nucleotidase 1 OS=Schizosaccharomyces pombe (strain 972 / ATCC 24843) OX=284812 GN=isn1 PE=3 SV=1	45.805	28.9	94445	4	4970.8
O74557	NADH-cytochrome b5 reductase 1	cbr1	26.795	589	sp|O74557|NCB5R_SCHPO NADH-cytochrome b5 reductase 1 OS=Schizosaccharomyces pombe (strain 972 / ATCC 24843) OX=284812 GN=cbr1 PE=3 SV=1	33.723	30.9	89098	3	4949.9
Q09801	Pre-mRNA polyadenylation factor fip1	SPAC22G7.10	3.4468	1239	sp|Q09801|FIP1X_SCHPO Pre-mRNA polyadenylation factor fip1 OS=Schizosaccharomyces pombe (strain 972 / ATCC 24843) OX=284812 GN=SPAC22G7.10 PE=3 SV=1	37.29	11.6	54320	1	4938.2
O94544	Leukotriene A-4 hydrolase homolog	SPCC1322.05c	70.745	792	sp|O94544|LKHA4_SCHPO Leucine aminopeptidase 2 OS=Schizosaccharomyces pombe (strain 972 / ATCC 24843) OX=284812 GN=lap2 PE=3 SV=1	69.521	24.5	177140	7	4920.5
O13808	Actin-depolymerizing factor gmf1	gmf1	14.596	108	sp|O13808|GMF1_SCHPO Actin-depolymerizing factor gmf1 OS=Schizosaccharomyces pombe (strain 972 / ATCC 24843) OX=284812 GN=gmf1 PE=3 SV=1	16.281	50.4	39347	1	4918.4
O94659	Probable nucleolar GTP-binding protein 1	nog1	39.293	828	sp|O94659|NOG1_SCHPO Probable nucleolar GTP-binding protein 1 OS=Schizosaccharomyces pombe (strain 972 / ATCC 24843) OX=284812 GN=nog1 PE=1 SV=2	72.798	19	162050	4	4910.5
O74827	Phosphatidyl-N-methylethanolamine N-methyltransferase	cho1	29.809	628	sp|O74827|PLMT_SCHPO Phosphatidyl-N-methylethanolamine N-methyltransferase OS=Schizosaccharomyces pombe (strain 972 / ATCC 24843) OX=284812 GN=cho1 PE=3 SV=1	24.767	14	53956	1	4905.1
O42909	Zinc-type alcohol dehydrogenase-like protein C16A3.02c	SPBC16A3.02c	36.387	337	sp|O42909|YBI2_SCHPO Zinc-type alcohol dehydrogenase-like protein C16A3.02c OS=Schizosaccharomyces pombe (strain 972 / ATCC 24843) OX=284812 GN=SPBC16A3.02c PE=3 SV=1	38.186	13.3	87932	1	4885.1
O42898	Probable catechol O-methyltransferase 1	SPBC119.03	28.19	332	sp|O42898|COMT1_SCHPO Probable catechol O-methyltransferase 1 OS=Schizosaccharomyces pombe (strain 972 / ATCC 24843) OX=284812 GN=SPBC119.03 PE=1 SV=1	30.266	22.2	87491	3	4860.6
Q9UUF7	Coatomer subunit beta	sec26	33.563	1834	sp|Q9UUF7|COPB_SCHPO Coatomer subunit beta OS=Schizosaccharomyces pombe (strain 972 / ATCC 24843) OX=284812 GN=sec26 PE=3 SV=1	104.7	13.5	207750	3	4831.4
O94315	Uncharacterized oxidoreductase C215.11c	SPBC215.11c	37.758	722	sp|O94315|YH5B_SCHPO Uncharacterized oxidoreductase C215.11c OS=Schizosaccharomyces pombe (strain 972 / ATCC 24843) OX=284812 GN=SPBC215.11c PE=3 SV=1	33.922	35.6	101390	3	4828
Q9Y876	Secretory component protein psh3	psh3	3.9506	1899	sp|Q9Y876|SHR3_SCHPO Secretory component protein psh3 OS=Schizosaccharomyces pombe (strain 972 / ATCC 24843) OX=284812 GN=psh3 PE=3 SV=1	24.06	6.5	28943	1	4823.9
P87232	54S ribosomal protein L4, mitochondrial	mrpl4	3.9875	1141	sp|P87232|RM04_SCHPO 54S ribosomal protein L4, mitochondrial OS=Schizosaccharomyces pombe (strain 972 / ATCC 24843) OX=284812 GN=mrpl4 PE=3 SV=1	16.586	18.1	38547	2	4818.4
P49740	Nucleoside diphosphate kinase	ndk1	24.472	1026	sp|P49740|NDK_SCHPO Nucleoside diphosphate kinase OS=Schizosaccharomyces pombe (strain 972 / ATCC 24843) OX=284812 GN=ndk1 PE=3 SV=1	17.012	32.5	43350	1	4816.6
P78810	Vacuolar transporter chaperone 4	vtc4	41.357	1066	sp|P78810|VTC4_SCHPO Vacuolar transporter chaperone 4 OS=Schizosaccharomyces pombe (strain 972 / ATCC 24843) OX=284812 GN=vtc4 PE=1 SV=2	83.634	23	187690	3	4812.5
Q9P6K0	Uncharacterized HTH La-type RNA-binding protein C1527.03	SPAC1527.03	48.792	1538	sp|Q9P6K0|YLA3_SCHPO Uncharacterized HTH La-type RNA-binding protein C1527.03 OS=Schizosaccharomyces pombe (strain 972 / ATCC 24843) OX=284812 GN=SPAC1527.03 PE=1 SV=1	53.232	19.2	86046	2	4780.3
O74536	SNF1-like protein kinase ssp2	ssp2	26.304	581	sp|O74536|SNF1_SCHPO SNF1-like protein kinase ssp2 OS=Schizosaccharomyces pombe (strain 972 / ATCC 24843) OX=284812 GN=ssp2 PE=1 SV=1	65.995	15.8	155750	3	4719.8
O43012	Deoxycytidylate deaminase	SPBC2G2.13c	56.214	368	sp|O43012|DCTD_SCHPO Deoxycytidylate deaminase OS=Schizosaccharomyces pombe (strain 972 / ATCC 24843) OX=284812 GN=SPBC2G2.13c PE=3 SV=2	35.974	35.7	99065	3	4717.4
O60158	Bouquet formation protein 4	bqt4	13.388	485	sp|O60158|BQT4_SCHPO Bouquet formation protein 4 OS=Schizosaccharomyces pombe (strain 972 / ATCC 24843) OX=284812 GN=bqt4 PE=1 SV=2	47.826	19.7	122550	3	4713.3
Q92398	Mitogen-activated protein kinase spm1	spm1	11.356	1457	sp|Q92398|SPM1_SCHPO Mitogen-activated protein kinase spm1 OS=Schizosaccharomyces pombe (strain 972 / ATCC 24843) OX=284812 GN=spm1 PE=1 SV=1	48.261	8.3	80090	2	4711.2
O94657	DnaJ protein homolog xdj1	xdj1	10.916	826	sp|O94657|XDJ1_SCHPO DnaJ protein homolog xdj1 OS=Schizosaccharomyces pombe (strain 972 / ATCC 24843) OX=284812 GN=xdj1 PE=3 SV=1	46.126	8.7	94146	2	4707.3
P0CH07;P0CH06	Ubiquitin-60S ribosomal protein L40;Ubiquitin;60S ribosomal protein L40	ubi2;ubi1	5.9766	871	sp|P0CH07|RL402_SCHPO Ubiquitin-60S ribosomal protein L40 OS=Schizosaccharomyces pombe (strain 972 / ATCC 24843) OX=284812 GN=uep1 PE=1 SV=1;sp|P0CH06|RL401_SCHPO Ubiquitin-60S ribosomal protein L40 OS=Schizosaccharomyces pombe (strain 972 / ATCC 24843) OX	14.595	46.1	28225	6	4704.1
O14209	Uncharacterized aminotransferase C6B12.04c	SPAC6B12.04c	38.263	231	sp|O14209|YDT4_SCHPO Uncharacterized aminotransferase C6B12.04c OS=Schizosaccharomyces pombe (strain 972 / ATCC 24843) OX=284812 GN=SPAC6B12.04c PE=3 SV=1	47.569	16.6	98170	4	4674.8
O74191	FK506-binding protein 39 kDa	fkbp39	60.424	505	sp|O74191|FKBP4_SCHPO FK506-binding protein 39 kDa OS=Schizosaccharomyces pombe (strain 972 / ATCC 24843) OX=284812 GN=fkbp39 PE=1 SV=1	39.301	33	69552	2	4636.8
O94660	Probable hydrolase nit2	nit2	6.6508	829	sp|O94660|NIT2_SCHPO Probable hydrolase nit2 OS=Schizosaccharomyces pombe (strain 972 / ATCC 24843) OX=284812 GN=nit2 PE=3 SV=1	30.421	18.8	69054	2	4603.6
O94408	U6 snRNA-associated Sm-like protein LSm2	lsm2	1.7429	755	sp|O94408|LSM2_SCHPO U6 snRNA-associated Sm-like protein LSm2 OS=Schizosaccharomyces pombe (strain 972 / ATCC 24843) OX=284812 GN=lsm2 PE=1 SV=1	10.989	8.3	27531	1	4588.5
O43029	L-pipecolate oxidase	fap1	11.559	374	sp|O43029|FAP1_SCHPO L-pipecolate oxidase OS=Schizosaccharomyces pombe (strain 972 / ATCC 24843) OX=284812 GN=fap1 PE=1 SV=1	46.319	15.5	100470	3	4567
Q09885	Survival factor 1	svf1	15.475	1265	sp|Q09885|SVF1_SCHPO Survival factor 1 OS=Schizosaccharomyces pombe (strain 972 / ATCC 24843) OX=284812 GN=svf1 PE=3 SV=1	42.961	26.1	86167	2	4535.1
O59678	Ribosome biogenesis regulatory protein homolog	SPBC29A3.16	8.5943	405	sp|O59678|RRS1_SCHPO Ribosome biogenesis regulatory protein homolog OS=Schizosaccharomyces pombe (strain 972 / ATCC 24843) OX=284812 GN=SPBC29A3.16 PE=1 SV=1	19.044	13.3	27125	1	4520.8
Q9UTE1	Probable 6-phosphofructo-2-kinase C222.13c	SPAC222.13c	44.427	1764	sp|Q9UTE1|YFMD_SCHPO Probable 6-phosphofructo-2-kinase C222.13c OS=Schizosaccharomyces pombe (strain 972 / ATCC 24843) OX=284812 GN=SPAC222.13c PE=3 SV=1	68.639	15	140110	2	4519.5
O74940	Putative glutamine-dependent NAD(+) synthetase	SPCC553.02	16.597	670	sp|O74940|NADE_SCHPO Putative glutamine-dependent NAD(+) synthetase OS=Schizosaccharomyces pombe (strain 972 / ATCC 24843) OX=284812 GN=SPCC553.02 PE=3 SV=1	79.519	6.4	130920	2	4514.6
P78789	Uncharacterized protein C1919.03c	SPCC1919.03c	11.937	1061	sp|P78789|AAKB_SCHPO 5-AMP-activated protein kinase subunit beta OS=Schizosaccharomyces pombe (strain 972 / ATCC 24843) OX=284812 GN=amk2 PE=1 SV=2	32.969	15.1	58378	1	4490.6
P21534	Cytochrome c oxidase subunit 2	cox2	9.3216	907	sp|P21534|COX2_SCHPO Cytochrome c oxidase subunit 2 OS=Schizosaccharomyces pombe (strain 972 / ATCC 24843) OX=284812 GN=cox2 PE=3 SV=4	28.121	17.7	35565	1	4445.6
Q9P7X8	Probable DNA-directed RNA polymerase I subunit RPA2	rpa2	48.149	1627	sp|Q9P7X8|RPA2_SCHPO Probable DNA-directed RNA polymerase I subunit RPA2 OS=Schizosaccharomyces pombe (strain 972 / ATCC 24843) OX=284812 GN=rpa2 PE=1 SV=2	131.69	11.1	234920	5	4432.5
Q10149	Uncharacterized protein C1D4.02c	SPAC1D4.02c	4.1134	1314	sp|Q10149|YAT2_SCHPO Uncharacterized protein C1D4.02c OS=Schizosaccharomyces pombe (strain 972 / ATCC 24843) OX=284812 GN=SPAC1D4.02c PE=3 SV=2	37.834	4.3	57219	1	4401.5
O42932	Cytochrome b-c1 complex subunit 6	qcr6	19.579	347	sp|O42932|QCR6_SCHPO Cytochrome b-c1 complex subunit 6 OS=Schizosaccharomyces pombe (strain 972 / ATCC 24843) OX=284812 GN=qcr6 PE=3 SV=1	24.307	37.9	57196	2	4399.7
P56288	Probable translation initiation factor eIF-2B subunit gamma	tif223	21.814	1049	sp|P56288|EI2BG_SCHPO Probable translation initiation factor eIF-2B subunit gamma OS=Schizosaccharomyces pombe (strain 972 / ATCC 24843) OX=284812 GN=tif223 PE=1 SV=2	50.461	19.9	105480	3	4394.8
O13696	Isocitrate dehydrogenase [NAD] subunit 1, mitochondrial	idh1	22.127	77	sp|O13696|IDH1_SCHPO Isocitrate dehydrogenase [NAD] subunit 1, mitochondrial OS=Schizosaccharomyces pombe (strain 972 / ATCC 24843) OX=284812 GN=idh1 PE=1 SV=1	38.758	16	87650	2	4382.5
O13809	Uncharacterized FAD-binding protein C17H9.12c	SPAC17H9.12c	44.267	109	sp|O13809|YE0C_SCHPO Uncharacterized FAD-binding protein C17H9.12c OS=Schizosaccharomyces pombe (strain 972 / ATCC 24843) OX=284812 GN=SPAC17H9.12c PE=3 SV=1	29.375	42.5	65678	2	4378.6
O94449	Replication factor C subunit 4	rfc4	6.4135	771	sp|O94449|RFC4_SCHPO Replication factor C subunit 4 OS=Schizosaccharomyces pombe (strain 972 / ATCC 24843) OX=284812 GN=rfc4 PE=1 SV=1	37.654	10.2	78726	2	4373.7
O60073	Synaptobrevin homolog ykt6	ykt6	26.572	460	sp|O60073|YKT6_SCHPO Synaptobrevin homolog ykt6 OS=Schizosaccharomyces pombe (strain 972 / ATCC 24843) OX=284812 GN=ykt6 PE=3 SV=1	22.651	45.2	61013	2	4358.1
Q9HGL3	Protein sum2	sum2	50.011	1503	sp|Q9HGL3|SUM2_SCHPO Protein sum2 OS=Schizosaccharomyces pombe (strain 972 / ATCC 24843) OX=284812 GN=sum2 PE=1 SV=1	46.224	11	73870	1	4345.3
Q10093	Uncharacterized protein C11D3.14c	SPAC11D3.14c	50.514	1297	sp|Q10093|YAOE_SCHPO Uncharacterized protein C11D3.14c OS=Schizosaccharomyces pombe (strain 972 / ATCC 24843) OX=284812 GN=SPAC11D3.14c PE=3 SV=1	138.78	13.5	258720	5	4312
O13755	Fumarate reductase	osm1	27.452	90	sp|O13755|OSM1_SCHPO Fumarate reductase OS=Schizosaccharomyces pombe (strain 972 / ATCC 24843) OX=284812 GN=osm1 PE=3 SV=1	55.483	12.1	115970	2	4295.4
Q9UTK3	Probable nicotinate phosphoribosyltransferase	SPAC1486.06	73.706	1786	sp|Q9UTK3|NPT1_SCHPO Probable nicotinate phosphoribosyltransferase OS=Schizosaccharomyces pombe (strain 972 / ATCC 24843) OX=284812 GN=SPAC1486.06 PE=3 SV=1	46.694	23.4	102140	5	4255.7
Q10410	Probable ADP-ribosylation factor-binding protein C1F3.05	SPAC1F3.05	28.156	1395	sp|Q10410|YD85_SCHPO Probable ADP-ribosylation factor-binding protein C1F3.05 OS=Schizosaccharomyces pombe (strain 972 / ATCC 24843) OX=284812 GN=SPAC1F3.05 PE=3 SV=1	56.789	15.5	80453	2	4234.4
O14225	Mitochondrial import receptor subunit tom20	tom20	22.399	237	sp|O14225|TOM20_SCHPO Mitochondrial import receptor subunit tom20 OS=Schizosaccharomyces pombe (strain 972 / ATCC 24843) OX=284812 GN=tom20 PE=3 SV=1	17.529	46.1	33861	1	4232.6
O74476	Importin subunit beta-3	sal3	34.429	559	sp|O74476|IMB3_SCHPO Importin subunit beta-3 OS=Schizosaccharomyces pombe (strain 972 / ATCC 24843) OX=284812 GN=sal3 PE=3 SV=1	121.87	9.8	194140	4	4220.4
Q10058	Putative oxidoreductase C1F5.03c	SPAC1F5.03c	17.503	1291	sp|Q10058|YAM3_SCHPO Putative oxidoreductase C1F5.03c OS=Schizosaccharomyces pombe (strain 972 / ATCC 24843) OX=284812 GN=SPAC1F5.03c PE=3 SV=1	41.501	25.9	80181	2	4220
O42906	GPN-loop GTPase 1	SPBC119.15	7.8856	335	sp|O42906|GPN1_SCHPO GPN-loop GTPase 1 OS=Schizosaccharomyces pombe (strain 972 / ATCC 24843) OX=284812 GN=SPBC119.15 PE=1 SV=1	41.642	6.3	58772	1	4198
Q9P378	1,3-beta-glucanosyltransferase gas1	gas1	4.1359	1515	sp|Q9P378|GAS1_SCHPO 1,3-beta-glucanosyltransferase gas1 OS=Schizosaccharomyces pombe (strain 972 / ATCC 24843) OX=284812 GN=gas1 PE=1 SV=1	58.115	2.6	41602	1	4160.2
O74545	Putative hydrolase C777.06c	SPCC777.06c	23.668	583	sp|O74545|YCV6_SCHPO Putative hydrolase C777.06c OS=Schizosaccharomyces pombe (strain 972 / ATCC 24843) OX=284812 GN=SPCC777.06c PE=4 SV=1	33.805	11	74461	2	4136.7
Q9UT87	54S ribosomal protein subunit img1, mitochondrial	img1	3.8377	1750	sp|Q9UT87|IMG1_SCHPO 54S ribosomal protein subunit img1, mitochondrial OS=Schizosaccharomyces pombe (strain 972 / ATCC 24843) OX=284812 GN=img1 PE=3 SV=1	21.373	11.5	37155	2	4128.3
Q10107	Ribosomal RNA small subunit methyltransferase mra1	mra1	5.9598	1305	sp|Q10107|NEP1_SCHPO Ribosomal RNA small subunit methyltransferase mra1 OS=Schizosaccharomyces pombe (strain 972 / ATCC 24843) OX=284812 GN=mra1 PE=1 SV=2	39.775	9.5	81815	2	4090.7
Q9USP8	Isocitrate dehydrogenase [NAD] subunit 2, mitochondrial	idh2	15.669	1692	sp|Q9USP8|IDH2_SCHPO Isocitrate dehydrogenase [NAD] subunit 2, mitochondrial OS=Schizosaccharomyces pombe (strain 972 / ATCC 24843) OX=284812 GN=idh2 PE=1 SV=2	41.188	15	85845	2	4087.9
Q9UUG1	Ribosome production factor 2 homolog	SPAC926.08c	20.592	1836	sp|Q9UUG1|RPF2_SCHPO Ribosome production factor 2 homolog OS=Schizosaccharomyces pombe (strain 972 / ATCC 24843) OX=284812 GN=SPAC926.08c PE=1 SV=1	36.071	22.1	65207	3	4075.5
Q09925	Serine palmitoyltransferase 2	lcb2	65.397	1287	sp|Q09925|LCB2_SCHPO Serine palmitoyltransferase 2 OS=Schizosaccharomyces pombe (strain 972 / ATCC 24843) OX=284812 GN=lcb2 PE=3 SV=1	67.518	14.6	118130	3	4073.4
P87132	Uncharacterized protein C167.05		12.506	1122	sp|P87132|YFK5_SCHPO Uncharacterized protein C167.05 OS=Schizosaccharomyces pombe (strain 972 / ATCC 24843) OX=284812 GN=SPAC167.05 PE=1 SV=2	65.947	9.5	126250	3	4072.6
Q9UU88	Adenylate kinase isoenzyme 6 homolog	SPCC830.11c	8.3016	1812	sp|Q9UU88|KAD6_SCHPO Adenylate kinase isoenzyme 6 homolog OS=Schizosaccharomyces pombe (strain 972 / ATCC 24843) OX=284812 GN=SPCC830.11c PE=3 SV=1	20.222	14.3	36387	1	4043
O59675	40S ribosomal protein S9-B	rps9b	25.235	403	sp|O59675|RS9B_SCHPO 40S ribosomal protein S9-B OS=Schizosaccharomyces pombe (strain 972 / ATCC 24843) OX=284812 GN=rps902 PE=1 SV=3	22.245	50.5	44391	9	4035.5
O74762	26S proteasome regulatory subunit rpn2	rpn2	110.39	606	sp|O74762|RPN2_SCHPO 26S proteasome regulatory subunit rpn2 OS=Schizosaccharomyces pombe (strain 972 / ATCC 24843) OX=284812 GN=rpn2 PE=1 SV=1	107.28	13.9	205480	5	4029
O13928	GTP-binding protein rho3	rho3	2.5106	148	sp|O13928|RHO3_SCHPO GTP-binding protein rho3 OS=Schizosaccharomyces pombe (strain 972 / ATCC 24843) OX=284812 GN=rho3 PE=1 SV=2	22.501	7.8	52180	1	4013.8
O94267	FACT complex subunit spt16	spt16	87.209	699	sp|O94267|SPT16_SCHPO FACT complex subunit spt16 OS=Schizosaccharomyces pombe (strain 972 / ATCC 24843) OX=284812 GN=spt16 PE=1 SV=1	116.45	16.4	207900	6	3998
O43078	ATPase-like fidgetin	alf1	24.944	395	sp|O43078|ALF1_SCHPO ATPase-like fidgetin OS=Schizosaccharomyces pombe (strain 972 / ATCC 24843) OX=284812 GN=alf1 PE=1 SV=1	71.732	8.3	127530	3	3985.2
Q9P6R6	ATP synthase subunit delta, mitochondrial	atp16	5.9952	1555	sp|Q9P6R6|ATPD_SCHPO ATP synthase subunit delta, mitochondrial OS=Schizosaccharomyces pombe (strain 972 / ATCC 24843) OX=284812 GN=atp16 PE=3 SV=2	18.41	16.8	43828	1	3984.4
Q9UT81	UBX domain-containing protein 3	ubx3	47.104	1748	sp|Q9UT81|UBX3_SCHPO UBX domain-containing protein 3 OS=Schizosaccharomyces pombe (strain 972 / ATCC 24843) OX=284812 GN=ubx3 PE=1 SV=1	44.896	20.2	75665	3	3982.4
P28745	Protein pim1	pim1	53.1	925	sp|P28745|RCC1_SCHPO Protein pim1 OS=Schizosaccharomyces pombe (strain 972 / ATCC 24843) OX=284812 GN=pim1 PE=1 SV=2	58.349	21.2	103180	5	3968.5
P48008	Septin homolog spn3	spn3	19.758	1022	sp|P48008|SPN3_SCHPO Septin homolog spn3 OS=Schizosaccharomyces pombe (strain 972 / ATCC 24843) OX=284812 GN=spn3 PE=1 SV=3	46.66	16	75375	2	3967.1
O14023	Probable elongator complex protein 3	elp3	25.67	175	sp|O14023|ELP3_SCHPO elongator complex protein 3 OS=Schizosaccharomyces pombe (strain 972 / ATCC 24843) OX=284812 GN=elp3 PE=3 SV=1	61.849	14	122100	3	3938.8
Q96WV1	tRNA (guanine-N(7)-)-methyltransferase	trm8	1.6344	1461	sp|Q96WV1|TRMB_SCHPO tRNA (guanine-N(7)-)-methyltransferase OS=Schizosaccharomyces pombe (strain 972 / ATCC 24843) OX=284812 GN=trm8 PE=3 SV=1	31.622	2.9	46998	1	3916.5
O74351	Probable cysteine desulfurase, mitochondrial	SPBC21D10.11c	28.886	516	sp|O74351|NFS1_SCHPO Probable cysteine desulfurase, mitochondrial OS=Schizosaccharomyces pombe (strain 972 / ATCC 24843) OX=284812 GN=SPBC21D10.11c PE=3 SV=2	55.543	20.2	105520	3	3908.2
O74772	Pre-mRNA-splicing factor cwf14	cwf14	6.616	610	sp|O74772|CWF14_SCHPO Pre-mRNA-splicing factor cwf14 OS=Schizosaccharomyces pombe (strain 972 / ATCC 24843) OX=284812 GN=cwf14 PE=1 SV=1	17.094	9.6	35065	1	3896.1
O74559	Surfeit locus protein 4 homolog	SPCC970.06	13.603	590	sp|O74559|SURF4_SCHPO Surfeit locus protein 4 homolog OS=Schizosaccharomyces pombe (strain 972 / ATCC 24843) OX=284812 GN=SPCC970.06 PE=3 SV=1	34.385	10.3	54306	2	3879
P37382	DNA-directed RNA polymerase II subunit RPB3	rpb3	8.1367	977	sp|P37382|RPB3_SCHPO DNA-directed RNA polymerase II subunit RPB3 OS=Schizosaccharomyces pombe (strain 972 / ATCC 24843) OX=284812 GN=rpb3 PE=1 SV=2	33.716	12.8	50367	2	3874.4
G2TRJ4	Uncharacterized protein tam1	tam1	65.54	43	sp|G2TRJ4|TAM1_SCHPO Uncharacterized protein tam1 OS=Schizosaccharomyces pombe (strain 972 / ATCC 24843) OX=284812 GN=tam1 PE=2 SV=1	12.693	30.8	26867	1	3838.2
Q9UT74	Homoaconitase, mitochondrial	lys2	152.68	1747	sp|Q9UT74|LYS4_SCHPO Homoaconitase, mitochondrial OS=Schizosaccharomyces pombe (strain 972 / ATCC 24843) OX=284812 GN=lys2 PE=3 SV=1	78.024	25.5	153320	3	3833.1
O94274	Uncharacterized protein P8B7.26	SPBP8B7.26	4.6038	703	sp|O94274|YORQ_SCHPO Uncharacterized protein P8B7.26 OS=Schizosaccharomyces pombe (strain 972 / ATCC 24843) OX=284812 GN=SPBP8B7.26 PE=4 SV=2	27.489	19.1	45963	2	3830.3
O14274	D-tyrosyl-tRNA(Tyr) deacylase	dtd1	8.1228	252	sp|O14274|DTD_SCHPO D-aminoacyl-tRNA deacylase OS=Schizosaccharomyces pombe (strain 972 / ATCC 24843) OX=284812 GN=dtd1 PE=3 SV=1	16.334	14.1	26385	1	3769.3
O74787	Phosphatidylethanolamine N-methyltransferase	cho2	24.41	615	sp|O74787|CHO2_SCHPO Phosphatidylethanolamine N-methyltransferase OS=Schizosaccharomyces pombe (strain 972 / ATCC 24843) OX=284812 GN=cho2 PE=1 SV=1	102.76	10.6	138870	5	3753.1
Q9P6Q2	Enolase-phosphatase E1	utr4	10.985	1551	sp|Q9P6Q2|ENOPH_SCHPO Enolase-phosphatase E1 OS=Schizosaccharomyces pombe (strain 972 / ATCC 24843) OX=284812 GN=utr4 PE=3 SV=1	24.423	12	56173	2	3744.9
O14077	Putative zinc protease mug138	mug138	11.177	196	sp|O14077|MU138_SCHPO Putative zinc protease mug138 OS=Schizosaccharomyces pombe (strain 972 / ATCC 24843) OX=284812 GN=mug138 PE=1 SV=1	112.14	8.7	205810	2	3742.1
P36629	Splicing factor U2AF 59 kDa subunit	prp2	33.461	975	sp|P36629|U2AF2_SCHPO Splicing factor U2AF 59 kDa subunit OS=Schizosaccharomyces pombe (strain 972 / ATCC 24843) OX=284812 GN=prp2 PE=1 SV=1	58.932	15.7	100880	3	3736.3
O94460	Probable queuine tRNA-ribosyltransferase	SPAC1687.19c	10.494	772	sp|O94460|TGT_SCHPO Queuine tRNA-ribosyltransferase catalytic subunit OS=Schizosaccharomyces pombe (strain 972 / ATCC 24843) OX=284812 GN=SPAC1687.19c PE=3 SV=1	45.176	8.4	78446	2	3735.5
Q10276	Putative choline kinase	SPAC13G7.12c	7.5592	1361	sp|Q10276|KICH_SCHPO Choline kinase OS=Schizosaccharomyces pombe (strain 972 / ATCC 24843) OX=284812 GN=SPAC13G7.12c PE=3 SV=1	52.535	5.5	89620	2	3734.2
P17937	60S ribosomal protein L7-A	rpl7a	5.8285	901	sp|P17937|RL7A_SCHPO 60S ribosomal protein L7-A OS=Schizosaccharomyces pombe (strain 972 / ATCC 24843) OX=284812 GN=rlp7 PE=3 SV=1	29.165	11.2	41006	1	3727.8
P49373	Transcription elongation factor S-II	tfs1	34.315	1024	sp|P49373|TFS2_SCHPO Transcription elongation factor S-II OS=Schizosaccharomyces pombe (strain 972 / ATCC 24843) OX=284812 GN=tfs1 PE=3 SV=1	32.734	13	63080	1	3710.6
Q9USS0	Nicotinamidase	pnc1	5.9053	1700	sp|Q9USS0|PNC1_SCHPO Nicotinamidase OS=Schizosaccharomyces pombe (strain 972 / ATCC 24843) OX=284812 GN=pnc1 PE=3 SV=2	24.5	20.5	48101	2	3700.1
O94511	Putative enoyl reductase C646.07c	SPBC646.07c	10.562	782	sp|O94511|YN67_SCHPO Putative enoyl reductase C646.07c OS=Schizosaccharomyces pombe (strain 972 / ATCC 24843) OX=284812 GN=SPBC646.07c PE=3 SV=1	34.64	14.6	58953	2	3684.6
O14242	Putative pyridoxal kinase C6F6.11c	SPAC6F6.11c	27.059	244	sp|O14242|YELB_SCHPO Putative pyridoxal kinase C6F6.11c OS=Schizosaccharomyces pombe (strain 972 / ATCC 24843) OX=284812 GN=SPAC6F6.11c PE=3 SV=2	33.998	9.4	58869	1	3679.3
Q10163	Small nuclear ribonucleoprotein-associated protein B	smb1	12.141	1319	sp|Q10163|RSMB_SCHPO Small nuclear ribonucleoprotein-associated protein B OS=Schizosaccharomyces pombe (strain 972 / ATCC 24843) OX=284812 GN=smb1 PE=1 SV=1	15.476	15	33081	1	3675.7
O94442	Cytosolic Fe-S cluster assembly factor nbp35	nbp35	3.9548	767	sp|O94442|NBP35_SCHPO Cytosolic Fe-S cluster assembly factor nbp35 OS=Schizosaccharomyces pombe (strain 972 / ATCC 24843) OX=284812 GN=nbp35 PE=3 SV=1	34.261	5.7	51318	1	3665.6
Q9UT18	Thiamine transporter thi9	thi9	24.098	1728	sp|Q9UT18|THI9_SCHPO Thiamine transporter thi9 OS=Schizosaccharomyces pombe (strain 972 / ATCC 24843) OX=284812 GN=thi9 PE=1 SV=1	65.069	10	54922	1	3661.5
P22194	Protein phosphatase 1 regulatory subunit SDS22	sds22	92.784	912	sp|P22194|SDS22_SCHPO Protein phosphatase 1 regulatory subunit SDS22 OS=Schizosaccharomyces pombe (strain 972 / ATCC 24843) OX=284812 GN=sds22 PE=1 SV=2	38.066	37.7	61567	2	3621.6
O74891	Probable coatomer subunit zeta	ret3	25.451	656	sp|O74891|COPZ_SCHPO Probable coatomer subunit zeta OS=Schizosaccharomyces pombe (strain 972 / ATCC 24843) OX=284812 GN=ret3 PE=3 SV=1	21.686	11.6	28810	1	3601.2
O60172	Thiamine-repressible acid phosphatase SPBC21H7.03c	SPBC21H7.03c	3.1552	492	sp|O60172|PPA3_SCHPO Thiamine-repressible acid phosphatase SPBC21H7.03c OS=Schizosaccharomyces pombe (strain 972 / ATCC 24843) OX=284812 GN=SPBC21H7.03c PE=2 SV=1	52.758	1.7	64688	1	3593.8
Q10055	ATP-dependent RNA helicase fal1	tif412	24.382	1289	sp|Q10055|FAL1_SCHPO ATP-dependent RNA helicase fal1 OS=Schizosaccharomyces pombe (strain 972 / ATCC 24843) OX=284812 GN=tif412 PE=1 SV=1	44.706	26.4	75237	5	3582.7
P33886	Protein kinase wis1	wis1	14.27	944	sp|P33886|WIS1_SCHPO Protein kinase wis1 OS=Schizosaccharomyces pombe (strain 972 / ATCC 24843) OX=284812 GN=wis1 PE=1 SV=1	64.762	8.1	93131	1	3582
Q9Y7L1	Phosducin-like protein C2A9.09	SPBC2A9.09	10.927	1865	sp|Q9Y7L1|YGI9_SCHPO Phosducin-like protein C2A9.09 OS=Schizosaccharomyces pombe (strain 972 / ATCC 24843) OX=284812 GN=SPBC2A9.09 PE=1 SV=2	26.246	9.4	42733	1	3561.1
Q9UTE4	Uncharacterized glutaminase C222.08c	SPAC222.08c	13.339	1767	sp|Q9UTE4|YFM8_SCHPO Uncharacterized glutaminase C222.08c OS=Schizosaccharomyces pombe (strain 972 / ATCC 24843) OX=284812 GN=SPAC222.08c PE=3 SV=1	25.901	10.3	39156	1	3559.7
P30666	DNA replication licensing factor mcm3	mcm3	107.41	931	sp|P30666|MCM3_SCHPO DNA replication licensing factor mcm3 OS=Schizosaccharomyces pombe (strain 972 / ATCC 24843) OX=284812 GN=mcm3 PE=1 SV=2	97.48	19	166730	5	3547.5
Q9P7C9	m7GpppX diphosphatase	nhm1	11.829	1573	sp|Q9P7C9|DCPS_SCHPO m7GpppX diphosphatase OS=Schizosaccharomyces pombe (strain 972 / ATCC 24843) OX=284812 GN=nhm1 PE=1 SV=1	35.106	12.5	56497	2	3531.1
O94436	Transcription initiation factor TFIID subunit 14	tfg3	40.255	764	sp|O94436|TAF14_SCHPO Transcription initiation factor TFIID subunit 14 OS=Schizosaccharomyces pombe (strain 972 / ATCC 24843) OX=284812 GN=tfg3 PE=1 SV=1	27.638	29.5	38828	1	3529.8
Q09870	Probable RNA 3-terminal phosphate cyclase-like protein	SPAC12G12.06c	12.825	1262	sp|Q09870|RCL1_SCHPO Probable RNA 3-terminal phosphate cyclase-like protein OS=Schizosaccharomyces pombe (strain 972 / ATCC 24843) OX=284812 GN=SPAC12G12.06c PE=3 SV=1	39.525	11.8	77576	1	3526.2
Q10104	Serine hydroxymethyltransferase, mitochondrial	shm2	60.385	1303	sp|Q10104|GLYM_SCHPO Serine hydroxymethyltransferase, mitochondrial OS=Schizosaccharomyces pombe (strain 972 / ATCC 24843) OX=284812 GN=shm2 PE=3 SV=2	53.978	17.2	95004	4	3518.7
O14165	Uncharacterized protein C4C5.01	SPAC4C5.01	1.9471	223	sp|O14165|YDX1_SCHPO Uncharacterized protein C4C5.01 OS=Schizosaccharomyces pombe (strain 972 / ATCC 24843) OX=284812 GN=SPAC4C5.01 PE=3 SV=2	27.382	6	41971	1	3497.6
O94416	Transcription initiation factor IIF subunit alpha	tfg1	8.5143	759	sp|O94416|T2FA_SCHPO Transcription initiation factor IIF subunit alpha OS=Schizosaccharomyces pombe (strain 972 / ATCC 24843) OX=284812 GN=tfg1 PE=1 SV=2	61.611	5.4	62492	2	3471.8
O42897	Probable 26S proteasome regulatory subunit rpn3	rpn3	37.337	331	sp|O42897|RPN3_SCHPO Probable 26S proteasome regulatory subunit rpn3 OS=Schizosaccharomyces pombe (strain 972 / ATCC 24843) OX=284812 GN=rpn3 PE=3 SV=2	57.346	20.7	90128	3	3466.5
Q09172	Protein phosphatase 2C homolog 2	ptc2	9.5787	1170	sp|Q09172|PP2C2_SCHPO Protein phosphatase 2C homolog 2 OS=Schizosaccharomyces pombe (strain 972 / ATCC 24843) OX=284812 GN=ptc2 PE=3 SV=1	40.878	11.6	65369	2	3440.5
O14037	UPF0538 protein C2C4.04c	SPAC2C4.04c	8.8098	181	sp|O14037|YEY4_SCHPO UPF0538 protein C2C4.04c OS=Schizosaccharomyces pombe (strain 972 / ATCC 24843) OX=284812 GN=SPAC2C4.04c PE=3 SV=1	14.55	31.2	23969	1	3424.1
P36587	NADPH--cytochrome P450 reductase	ccr1	37.245	956	sp|P36587|NCPR_SCHPO NADPH--cytochrome P450 reductase OS=Schizosaccharomyces pombe (strain 972 / ATCC 24843) OX=284812 GN=ccr1 PE=2 SV=1	76.774	19.9	119550	4	3415.8
Q9UTE0	Protein sey1	sey1	58.315	1763	sp|Q9UTE0|SEY1_SCHPO Protein sey1 OS=Schizosaccharomyces pombe (strain 972 / ATCC 24843) OX=284812 GN=sey1 PE=1 SV=1	87.509	16.9	150170	4	3412.9
Q10498	Protein HGH1 homolog	hgh1	32.872	1416	sp|Q10498|HGH1_SCHPO Protein HGH1 homolog OS=Schizosaccharomyces pombe (strain 972 / ATCC 24843) OX=284812 GN=hgh1 PE=3 SV=1	41.26	18.8	54371	2	3398.2
Q9USP6	Clathrin light chain	clc1	25.643	1691	sp|Q9USP6|CLC1_SCHPO Clathrin light chain OS=Schizosaccharomyces pombe (strain 972 / ATCC 24843) OX=284812 GN=clc1 PE=1 SV=1	25.863	11.8	40617	1	3384.8
Q9USH7	Syntaxin-like protein psy1	psy1	42.921	1672	sp|Q9USH7|PSY1_SCHPO Syntaxin-like protein psy1 OS=Schizosaccharomyces pombe (strain 972 / ATCC 24843) OX=284812 GN=psy1 PE=3 SV=1	32.55	11.6	47001	2	3357.2
Q10231	Lanosterol synthase	erg7	6.4103	1346	sp|Q10231|ERG7_SCHPO Lanosterol synthase OS=Schizosaccharomyces pombe (strain 972 / ATCC 24843) OX=284812 GN=erg7 PE=2 SV=1	82.818	7.4	96701	2	3334.5
O13801	Uncharacterized RNA-binding protein C17H9.04c	SPAC17H9.04c	42.769	106	sp|O13801|DRI1_SCHPO RNA-binding protein involved in heterochromatin assembly dri1 OS=Schizosaccharomyces pombe (strain 972 / ATCC 24843) OX=284812 GN=dri1 PE=1 SV=1	66.396	14.2	66346	2	3317.3
O14324	Uncharacterized membrane protein C16E9.09c	SPBC16E9.09c	28.989	267	sp|O14324|YB79_SCHPO Uncharacterized membrane protein C16E9.09c OS=Schizosaccharomyces pombe (strain 972 / ATCC 24843) OX=284812 GN=SPBC16E9.09c PE=3 SV=1	24.845	24.2	43089	2	3314.6
Q9HGP1	Uncharacterized protein C29B5.04c	SPBC29B5.04c	28.382	1511	sp|Q9HGP1|YNK4_SCHPO Uncharacterized protein C29B5.04c OS=Schizosaccharomyces pombe (strain 972 / ATCC 24843) OX=284812 GN=SPBC29B5.04c PE=4 SV=1	68.508	14	119320	4	3314.5
O94512	Oxysterol-binding protein-like protein 1	obp1	21.713	783	sp|O94512|OBP1_SCHPO Oxysterol-binding protein-like protein 1 OS=Schizosaccharomyces pombe (strain 972 / ATCC 24843) OX=284812 GN=obp1 PE=1 SV=1	58.691	19.2	106020	4	3313.1
O36015	Putative tRNA (cytidine(32)/guanosine(34)-2-O)-methyltransferase	SPAC4F10.03c	3.8688	294	sp|O36015|TRM7_SCHPO Putative tRNA (cytidine(32)/guanosine(34)-2-O)-methyltransferase OS=Schizosaccharomyces pombe (strain 972 / ATCC 24843) OX=284812 GN=SPAC4F10.03c PE=3 SV=1	31.466	5.3	19785	1	3297.5
Q9P7S1	PDZ domain-containing protein C23G3.12c	SPAC23G3.12c	42.625	1607	sp|Q9P7S1|YIFC_SCHPO PDZ domain-containing protein C23G3.12c OS=Schizosaccharomyces pombe (strain 972 / ATCC 24843) OX=284812 GN=SPAC23G3.12c PE=2 SV=1	110.41	16.8	180680	6	3285.1
O13982	Uncharacterized WD repeat-containing protein C25H1.08c	SPAC25H1.08c	20.307	164	sp|O13982|YEC8_SCHPO Uncharacterized WD repeat-containing protein C25H1.08c OS=Schizosaccharomyces pombe (strain 972 / ATCC 24843) OX=284812 GN=SPAC25H1.08c PE=4 SV=1	43.431	11.5	39299	1	3274.9
Q9UUK0	Pyridoxamine 5-phosphate oxidase C1952.08c homolog	SPAC1952.08c	2.4997	1849	sp|Q9UUK0|PDXH_SCHPO Pyridoxamine 5-phosphate oxidase C1952.08c homolog OS=Schizosaccharomyces pombe (strain 972 / ATCC 24843) OX=284812 GN=SPAC1952.08c PE=3 SV=1	21.653	6.3	22782	1	3254.6
P78817	Uncharacterized alpha-1,2-galactosyltransferase C637.06	SPAC637.06	11.296	1071	sp|P78817|YFE6_SCHPO Uncharacterized alpha-1,2-galactosyltransferase C637.06 OS=Schizosaccharomyces pombe (strain 972 / ATCC 24843) OX=284812 GN=SPAC637.06 PE=2 SV=2	41.127	12.4	45428	1	3244.8
Q10428	Serine/threonine-protein phosphatase 2A 56 kDa regulatory subunit delta 1 isoform	par1	9.9899	1398	sp|Q10428|2AD1_SCHPO Serine/threonine-protein phosphatase 2A 56 kDa regulatory subunit delta 1 isoform OS=Schizosaccharomyces pombe (strain 972 / ATCC 24843) OX=284812 GN=par1 PE=1 SV=1	63.345	6.6	77748	3	3239.5
O74847	Probable mitochondrial pyruvate carrier 1	mpc1	18.783	635	sp|O74847|MPC1_SCHPO Probable mitochondrial pyruvate carrier 1 OS=Schizosaccharomyces pombe (strain 972 / ATCC 24843) OX=284812 GN=mpc1 PE=3 SV=3	16.055	44.7	25903	1	3237.9
O74988	Cytochrome c oxidase polypeptide 5, mitochondrial	cox5	52.88	689	sp|O74988|COX5_SCHPO Cytochrome c oxidase polypeptide 5, mitochondrial OS=Schizosaccharomyces pombe (strain 972 / ATCC 24843) OX=284812 GN=cox5 PE=3 SV=2	20.735	44.1	35470	1	3224.6
Q10199	Septation protein imp2	imp2	33.75	1337	sp|Q10199|IMP2_SCHPO Septation protein imp2 OS=Schizosaccharomyces pombe (strain 972 / ATCC 24843) OX=284812 GN=imp2 PE=1 SV=1	75.166	15.1	119240	4	3222.7
O74504	UPF0590 protein C594.01		39.539	570	sp|O74504|YJD1_SCHPO UPF0590 protein C594.01 OS=Schizosaccharomyces pombe (strain 972 / ATCC 24843) OX=284812 GN=SPCC594.01 PE=1 SV=2	88.748	7.1	115200	2	3200.1
O74653	Protein pob1	pob1	26.094	593	sp|O74653|POB1_SCHPO Protein pob1 OS=Schizosaccharomyces pombe (strain 972 / ATCC 24843) OX=284812 GN=pob1 PE=1 SV=1	93.772	10.4	143730	3	3194.1
P41888	Thiamine pyrophosphokinase	tnr3	24.458	1014	sp|P41888|TNR3_SCHPO Thiamine pyrophosphokinase OS=Schizosaccharomyces pombe (strain 972 / ATCC 24843) OX=284812 GN=tnr3 PE=4 SV=1	64.235	10.4	92595	3	3192.9
O94316	Pre-mRNA-splicing factor cwf10	cwf10	85.961	723	sp|O94316|SN114_SCHPO Pre-mRNA-splicing factor cwf10 OS=Schizosaccharomyces pombe (strain 972 / ATCC 24843) OX=284812 GN=cwf10 PE=1 SV=2	111.31	29.8	181930	6	3191.8
P41391	Ran GTPase-activating protein 1	rna1	8.0149	1007	sp|P41391|RNA1_SCHPO Ran GTPase-activating protein 1 OS=Schizosaccharomyces pombe (strain 972 / ATCC 24843) OX=284812 GN=rna1 PE=1 SV=1	43.235	9.1	66972	1	3189.1
P36583	Protein kinase C-like 2	pck2	44.243	952	sp|P36583|PCK2_SCHPO Protein kinase C-like 2 OS=Schizosaccharomyces pombe (strain 972 / ATCC 24843) OX=284812 GN=pck2 PE=1 SV=2	116	9.4	181390	6	3182.2
Q9Y7X4	Uncharacterized membrane protein C365.16	SPBC365.16	4.2209	1884	sp|Q9Y7X4|YGRG_SCHPO Uncharacterized membrane protein C365.16 OS=Schizosaccharomyces pombe (strain 972 / ATCC 24843) OX=284812 GN=SPBC365.16 PE=4 SV=1	30.406	4.7	34795	1	3163.2
Q10295	Poly(A) polymerase pla1	pla1	28.031	1368	sp|Q10295|PAP_SCHPO Poly(A) polymerase pla1 OS=Schizosaccharomyces pombe (strain 972 / ATCC 24843) OX=284812 GN=pla1 PE=1 SV=1	64.108	15.5	100800	4	3150.1
Q9URV8	UPF0744 protein C106.03	SPBC106.03	20.376	1642	sp|Q9URV8|YBL3_SCHPO UPF0744 protein C106.03 OS=Schizosaccharomyces pombe (strain 972 / ATCC 24843) OX=284812 GN=SPBC106.03 PE=1 SV=1	40.006	19.9	59811	2	3148
O59702	Histone deacetylase clr6	clr6	16.21	411	sp|O59702|CLR6_SCHPO Histone deacetylase clr6 OS=Schizosaccharomyces pombe (strain 972 / ATCC 24843) OX=284812 GN=clr6 PE=1 SV=1	46.111	14.3	70407	2	3061.2
O42861	ATP-dependent helicase fft3	fft3	87.908	320	sp|O42861|FFT3_SCHPO ATP-dependent helicase fft3 OS=Schizosaccharomyces pombe (strain 972 / ATCC 24843) OX=284812 GN=fft3 PE=1 SV=1	104.5	17.6	140430	4	3052.8
O94279	Putative magnesium-dependent phosphatase P8B7.31	SPBP8B7.31	1.9176	705	sp|O94279|MGDP1_SCHPO Putative magnesium-dependent phosphatase P8B7.31 OS=Schizosaccharomyces pombe (strain 972 / ATCC 24843) OX=284812 GN=SPBP8B7.31 PE=1 SV=2	19.909	10.5	33416	1	3037.8
P78954	Eukaryotic translation initiation factor 4E-1	tif451	10.629	1089	sp|P78954|IF4E1_SCHPO Eukaryotic translation initiation factor 4E-1 OS=Schizosaccharomyces pombe (strain 972 / ATCC 24843) OX=284812 GN=tif451 PE=3 SV=1	24.958	27.1	27085	1	3009.5
Q9UTA9	Uncharacterized methyltransferase C25B8.09	SPAC25B8.09	4.9668	1756	sp|Q9UTA9|YL89_SCHPO Uncharacterized methyltransferase C25B8.09 OS=Schizosaccharomyces pombe (strain 972 / ATCC 24843) OX=284812 GN=SPAC25B8.09 PE=3 SV=1	28.468	6.8	42010	1	3000.7
O94424	Transcription initiation factor IIF subunit beta	tfg2	12.024	760	sp|O94424|T2FB_SCHPO Transcription initiation factor IIF subunit beta OS=Schizosaccharomyces pombe (strain 972 / ATCC 24843) OX=284812 GN=tfg2 PE=1 SV=1	34.622	16.3	47990	2	2999.4
Q9Y7Z5	Tetra-spanning protein 1	tts1	21.116	1893	sp|Q9Y7Z5|TTS1_SCHPO Tetra-spanning protein 1 OS=Schizosaccharomyces pombe (strain 972 / ATCC 24843) OX=284812 GN=tts1 PE=1 SV=1	31.57	14.3	47806	1	2987.9
Q10161	Probable clathrin heavy chain	chc1	66.99	1318	sp|Q10161|CLH_SCHPO Probable clathrin heavy chain OS=Schizosaccharomyces pombe (strain 972 / ATCC 24843) OX=284812 GN=chc1 PE=1 SV=1	190.02	7.4	226750	7	2983.5
Q09705	37S ribosomal protein S24, mitochondrial	rsm24	2.4606	1200	sp|Q09705|RT24_SCHPO 37S ribosomal protein S24, mitochondrial OS=Schizosaccharomyces pombe (strain 972 / ATCC 24843) OX=284812 GN=rsm24 PE=3 SV=1	29.839	5.8	53604	1	2978
O94617	Probable UDP-N-acetylglucosamine pyrophosphorylase	uap1	9.3126	814	sp|O94617|UAP1_SCHPO Probable UDP-N-acetylglucosamine pyrophosphorylase OS=Schizosaccharomyces pombe (strain 972 / ATCC 24843) OX=284812 GN=uap1 PE=1 SV=1	53.121	14.3	56146	2	2955
O14032	UPF0664 stress-induced protein C29B12.11c	SPAC29B12.11c	14.235	179	sp|O14032|YEMB_SCHPO UPF0664 stress-induced protein C29B12.11c OS=Schizosaccharomyces pombe (strain 972 / ATCC 24843) OX=284812 GN=SPAC29B12.11c PE=2 SV=1	19.704	9.8	29119	1	2911.9
O74863	tRNA (guanine-N(7)-)-methyltransferase non-catalytic subunit trm82	trm82	13.737	641	sp|O74863|TRM82_SCHPO tRNA (guanine-N(7)-)-methyltransferase non-catalytic subunit trm82 OS=Schizosaccharomyces pombe (strain 972 / ATCC 24843) OX=284812 GN=trm82 PE=1 SV=1	47.498	8.6	69581	2	2899.2
Q9UUH3	Uncharacterized kinase mug58	mug58	9.1842	1839	sp|Q9UUH3|MUG58_SCHPO Uncharacterized kinase mug58 OS=Schizosaccharomyces pombe (strain 972 / ATCC 24843) OX=284812 GN=mug58 PE=1 SV=1	31.809	13.7	46287	2	2893
P40374	Imidazoleglycerol-phosphate dehydratase	his5	8.8276	988	sp|P40374|HIS7_SCHPO Imidazoleglycerol-phosphate dehydratase OS=Schizosaccharomyces pombe (strain 972 / ATCC 24843) OX=284812 GN=his5 PE=1 SV=1	23.52	15.3	31701	1	2881.9
Q9C100	Dolichyl-phosphate-mannose--protein mannosyltransferase 2	ogm2	51.744	1476	sp|Q9C100|PMT2_SCHPO Dolichyl-phosphate-mannose--protein mannosyltransferase 2 OS=Schizosaccharomyces pombe (strain 972 / ATCC 24843) OX=284812 GN=ogm2 PE=3 SV=1	85.036	13.3	89133	3	2875.3
Q9P7D1	Uncharacterized protein P4H10.18c	SPBP4H10.18c	7.2308	1574	sp|Q9P7D1|YOFI_SCHPO Uncharacterized protein P4H10.18c OS=Schizosaccharomyces pombe (strain 972 / ATCC 24843) OX=284812 GN=SPBP4H10.18c PE=4 SV=1	35.879	11.5	45299	1	2831.2
Q9P380	Probable peptide transporter ptr2	ptr2	6.6897	1516	sp|Q9P380|PTR2_SCHPO Probable peptide transporter ptr2 OS=Schizosaccharomyces pombe (strain 972 / ATCC 24843) OX=284812 GN=ptr2 PE=1 SV=1	68.499	6.5	56511	2	2825.6
O13759	RNA-binding post-transcriptional regulator csx1	csx1	51.299	91	sp|O13759|CSX1_SCHPO RNA-binding post-transcriptional regulator csx1 OS=Schizosaccharomyces pombe (strain 972 / ATCC 24843) OX=284812 GN=csx1 PE=1 SV=1	67.87	18.4	75968	4	2813.6
O94340	Uncharacterized N-acetyltransferase C1271.07c	SPBC1271.07c	9.1307	732	sp|O94340|YHM7_SCHPO Uncharacterized N-acetyltransferase C1271.07c OS=Schizosaccharomyces pombe (strain 972 / ATCC 24843) OX=284812 GN=SPBC1271.07c PE=3 SV=1	18.478	29.4	25291	1	2810.1
O43034	Uncharacterized protein C3B9.05	SPBC3B9.05	1.461	377	sp|O43034|YGU5_SCHPO Uncharacterized protein C3B9.05 OS=Schizosaccharomyces pombe (strain 972 / ATCC 24843) OX=284812 GN=SPBC3B9.05 PE=4 SV=2	13.521	17.2	16855	1	2809.2
Q9P6L5	Endocytosis protein end4	end4	24.027	1542	sp|Q9P6L5|SLA2_SCHPO Endocytosis protein end4 OS=Schizosaccharomyces pombe (strain 972 / ATCC 24843) OX=284812 GN=end4 PE=1 SV=2	124.37	8.6	145780	3	2803.5
O59704	Elongator complex protein 1	iki3	17.443	412	sp|O59704|ELP1_SCHPO Elongator complex protein 1 OS=Schizosaccharomyces pombe (strain 972 / ATCC 24843) OX=284812 GN=iki3 PE=3 SV=1	141.61	8.1	165220	4	2800.3
O13862	Transcriptional activator protein rdp1	rdp1	7.8895	130	sp|O13862|RDP1L_SCHPO Transcriptional activator protein rdp1 OS=Schizosaccharomyces pombe (strain 972 / ATCC 24843) OX=284812 GN=rdp1 PE=4 SV=1	51.766	7.7	55782	1	2789.1
O60116	Putative ribokinase	SPBC16G5.02c	47.587	475	sp|O60116|RBSK_SCHPO Ribokinase OS=Schizosaccharomyces pombe (strain 972 / ATCC 24843) OX=284812 GN=rbk1 PE=3 SV=1	33.25	5	44239	1	2765
O13953	Chromatin modification-related protein eaf3	alp13	12.926	157	sp|O13953|EAF3_SCHPO Chromatin modification-related protein eaf3 OS=Schizosaccharomyces pombe (strain 972 / ATCC 24843) OX=284812 GN=alp13 PE=1 SV=1	39.138	18.4	63068	2	2742.1
Q10190	Large subunit GTPase 1	lsg1	33.101	1333	sp|Q10190|LSG1_SCHPO Large subunit GTPase 1 OS=Schizosaccharomyces pombe (strain 972 / ATCC 24843) OX=284812 GN=lsg1 PE=3 SV=1	69.674	26.8	93012	4	2735.7
Q10205	Exosome complex component rrp43	rrp43	4.1004	1339	sp|Q10205|RRP43_SCHPO Exosome complex component rrp43 OS=Schizosaccharomyces pombe (strain 972 / ATCC 24843) OX=284812 GN=rrp43 PE=3 SV=1	30.029	5.9	30055	1	2732.3
Q92462	E3 ubiquitin-protein ligase pub1	pub1	22.235	1459	sp|Q92462|PUB1_SCHPO E3 ubiquitin-protein ligase pub1 OS=Schizosaccharomyces pombe (strain 972 / ATCC 24843) OX=284812 GN=pub1 PE=1 SV=2	87.267	10.3	106400	2	2728.2
Q10436	Uncharacterized protein C12B10.02c	SPAC12B10.02c	9.3821	1402	sp|Q10436|YDE2_SCHPO Uncharacterized protein C12B10.02c OS=Schizosaccharomyces pombe (strain 972 / ATCC 24843) OX=284812 GN=SPAC12B10.02c PE=4 SV=1	26.934	11.1	32612	1	2717.6
O94672	Protein transport protein sec23-2	sec232	14.38	834	sp|O94672|SC232_SCHPO Protein transport protein sec23-2 OS=Schizosaccharomyces pombe (strain 972 / ATCC 24843) OX=284812 GN=sec232 PE=1 SV=1	85.381	8.5	107640	3	2690.9
Q10138	CRAL-TRIO domain-containing protein C3H8.02	SPAC3H8.02	5.8922	1310	sp|Q10138|YAS2_SCHPO CRAL-TRIO domain-containing protein C3H8.02 OS=Schizosaccharomyces pombe (strain 972 / ATCC 24843) OX=284812 GN=SPAC3H8.02 PE=1 SV=1	51.473	11	69876	3	2687.5
P49776	Bis(5-nucleosyl)-tetraphosphatase [asymmetrical]	aph1	3.9627	1027	sp|P49776|APH1_SCHPO Bis(5-nucleosyl)-tetraphosphatase [asymmetrical] OS=Schizosaccharomyces pombe (strain 972 / ATCC 24843) OX=284812 GN=aph1 PE=1 SV=2	20.685	16.5	24139	1	2682.1
Q09779	THO complex subunit 2	tho2	1.479	1228	sp|Q09779|THO2_SCHPO THO complex subunit 2 OS=Schizosaccharomyces pombe (strain 972 / ATCC 24843) OX=284812 GN=tho2 PE=1 SV=3	188.83	0.6	219830	1	2680.9
O94615	Pentatricopeptide repeat-containing protein 8, mitochondrial	ppr8	15.15	812	sp|O94615|PPR8_SCHPO Pentatricopeptide repeat-containing protein 8, mitochondrial OS=Schizosaccharomyces pombe (strain 972 / ATCC 24843) OX=284812 GN=ppr8 PE=4 SV=1	54.652	12.1	82904	2	2674.3
P50523	Cytochrome b-c1 complex subunit 8	qcr8	3.8233	1032	sp|P50523|QCR8_SCHPO Cytochrome b-c1 complex subunit 8 OS=Schizosaccharomyces pombe (strain 972 / ATCC 24843) OX=284812 GN=qcr8 PE=3 SV=1	10.467	14.1	18718	1	2674.1
O13956	Ribosome biogenesis protein tsr1 homolog	SPAC23H4.15	42.894	158	sp|O13956|TSR1_SCHPO Ribosome biogenesis protein tsr1 OS=Schizosaccharomyces pombe (strain 972 / ATCC 24843) OX=284812 GN=tsr1 PE=3 SV=1	90.125	13.2	98551	3	2663.5
Q9UUE2	Protein csx2	csx2	19.491	1827	sp|Q9UUE2|CSX2_SCHPO Protein csx2 OS=Schizosaccharomyces pombe (strain 972 / ATCC 24843) OX=284812 GN=csx2 PE=1 SV=1	99.081	11	124900	4	2602.1
O94435	Meiotically up-regulated gene 35 protein	mug35	29.772	763	sp|O94435|MUG35_SCHPO Meiotically up-regulated gene 35 protein OS=Schizosaccharomyces pombe (strain 972 / ATCC 24843) OX=284812 GN=mug35 PE=1 SV=2	27.521	28.6	41501	2	2593.8
O13753	V-type proton ATPase subunit d	vma6	17.416	88	sp|O13753|VA0D_SCHPO V-type proton ATPase subunit d OS=Schizosaccharomyces pombe (strain 972 / ATCC 24843) OX=284812 GN=vma6 PE=3 SV=1	39.323	11.4	46494	2	2583
Q9HGL2	Uncharacterized calcium-binding protein C800.10c	SPBC800.10c	10.769	1502	sp|Q9HGL2|YHLA_SCHPO Uncharacterized calcium-binding protein C800.10c OS=Schizosaccharomyces pombe (strain 972 / ATCC 24843) OX=284812 GN=SPBC800.10c PE=4 SV=1	120.54	7	116220	3	2582.7
O13788	SWI/SNF and RSC complexes subunit ssr1	ssr1	22.043	101	sp|O13788|SSR1_SCHPO SWI/SNF and RSC complexes subunit ssr1 OS=Schizosaccharomyces pombe (strain 972 / ATCC 24843) OX=284812 GN=ssr1 PE=1 SV=1	59.638	11	87391	2	2570.3
Q9C0Y6	Zinc-type alcohol dehydrogenase-like protein PB24D3.08c	SPAPB24D3.08c	14.375	1474	sp|Q9C0Y6|YKM8_SCHPO Zinc-type alcohol dehydrogenase-like protein PB24D3.08c OS=Schizosaccharomyces pombe (strain 972 / ATCC 24843) OX=284812 GN=SPAPB24D3.08c PE=3 SV=1	38.612	4.9	45951	1	2552.9
Q09686	Putative glutamine amidotransferase-like protein C13C5.04	SPAC13C5.04	16.981	1192	sp|Q09686|YA14_SCHPO Putative glutamine amidotransferase-like protein C13C5.04 OS=Schizosaccharomyces pombe (strain 972 / ATCC 24843) OX=284812 GN=SPAC13C5.04 PE=4 SV=1	28.003	21.8	27992	1	2544.7
Q09924	Probable translation initiation factor eIF-2B subunit delta	tif224	7.2353	1286	sp|Q09924|EI2BD_SCHPO Probable translation initiation factor eIF-2B subunit delta OS=Schizosaccharomyces pombe (strain 972 / ATCC 24843) OX=284812 GN=tif224 PE=1 SV=1	51.583	7.5	55973	2	2544.2
Q9P780	Nuclear protein localization protein 4	npl4	8.113	1562	sp|Q9P780|NPL4_SCHPO Nuclear protein localization protein 4 OS=Schizosaccharomyces pombe (strain 972 / ATCC 24843) OX=284812 GN=npl4 PE=3 SV=2	63.618	6.3	60886	1	2536.9
Q9UTQ8	Histidine protein methyltransferase 1	SPAC1071.05	5.7633	1799	sp|Q9UTQ8|HPM1_SCHPO Histidine protein methyltransferase 1 OS=Schizosaccharomyces pombe (strain 972 / ATCC 24843) OX=284812 GN=SPAC1071.05 PE=1 SV=1	38.247	4.7	37764	1	2517.6
Q9Y7P6	Meiotically up-regulated gene 72 protein	mug72	7.4301	1876	sp|Q9Y7P6|MUG72_SCHPO Meiotically up-regulated gene 72 protein OS=Schizosaccharomyces pombe (strain 972 / ATCC 24843) OX=284812 GN=mug72 PE=1 SV=1	62.846	4.7	67835	1	2512.4
Q10335	Probable 26S proteasome regulatory subunit rpn7	rpn7	28.015	1383	sp|Q10335|RPN7_SCHPO Probable 26S proteasome regulatory subunit rpn7 OS=Schizosaccharomyces pombe (strain 972 / ATCC 24843) OX=284812 GN=rpn7 PE=2 SV=1	46.68	12	64591	2	2484.3
O94529	FACT complex subunit pob3	pob3	43.461	790	sp|O94529|POB3_SCHPO FACT complex subunit pob3 OS=Schizosaccharomyces pombe (strain 972 / ATCC 24843) OX=284812 GN=pob3 PE=3 SV=1	57.456	15	64445	3	2478.7
O94681	Probable dihydrolipoyllysine-residue succinyltransferase component of 2-oxoglutarate dehydrogenase complex, mitochondrial	kgd2	4.061	836	sp|O94681|ODO2_SCHPO Probable dihydrolipoyllysine-residue succinyltransferase component of 2-oxoglutarate dehydrogenase complex, mitochondrial OS=Schizosaccharomyces pombe (strain 972 / ATCC 24843) OX=284812 GN=kgd2 PE=3 SV=1	48.964	4.6	61847	1	2473.9
O42919	Putative 37S ribosomal protein S26A, mitochondrial	SPBC16A3.14	3.32	341	sp|O42919|RT26A_SCHPO Putative 37S ribosomal protein S26A, mitochondrial OS=Schizosaccharomyces pombe (strain 972 / ATCC 24843) OX=284812 GN=SPBC16A3.14 PE=3 SV=3	30.973	7.5	31867	1	2451.3
P50530	Serine/threonine-protein kinase sck1	sck1	5.9151	1036	sp|P50530|SCK1_SCHPO Serine/threonine-protein kinase sck1 OS=Schizosaccharomyces pombe (strain 972 / ATCC 24843) OX=284812 GN=sck1 PE=1 SV=2	78.594	5.7	88196	3	2449.9
Q09879	Probable ubiquitin carboxyl-terminal hydrolase 5	ubp5	10.471	1264	sp|Q09879|UBP5_SCHPO Probable ubiquitin carboxyl-terminal hydrolase 5 OS=Schizosaccharomyces pombe (strain 972 / ATCC 24843) OX=284812 GN=ubp5 PE=3 SV=3	128.67	7	146910	5	2448.6
O74898	Diphthine synthase	dph5	3.0586	661	sp|O74898|DPH5_SCHPO Diphthine methyl ester synthase OS=Schizosaccharomyces pombe (strain 972 / ATCC 24843) OX=284812 GN=dph5 PE=3 SV=1	32.043	3.9	36635	1	2442.3
Q9USW5	40S ribosomal protein S4-B	rps4b	3.0688	1711	sp|Q9USW5|RS4B_SCHPO 40S ribosomal protein S4-B OS=Schizosaccharomyces pombe (strain 972 / ATCC 24843) OX=284812 GN=rps402 PE=1 SV=1	29.658	56.9	39047	12	2440.4
Q9C1W3	Probable squalene monooxygenase	erg1	23.734	1480	sp|Q9C1W3|ERG1_SCHPO Probable squalene monooxygenase OS=Schizosaccharomyces pombe (strain 972 / ATCC 24843) OX=284812 GN=erg1 PE=3 SV=1	50.338	32.6	58482	2	2436.7
Q9C0U9	Uncharacterized transporter PB1C11.03	SPCPB1C11.03	3.7286	1467	sp|Q9C0U9|YQD3_SCHPO Uncharacterized transporter PB1C11.03 OS=Schizosaccharomyces pombe (strain 972 / ATCC 24843) OX=284812 GN=SPCPB1C11.03 PE=1 SV=1	64.328	2.3	41414	1	2436.1
O13732	Uncharacterized protein C15A10.12c	SPAC15A10.12c	3.9773	81	sp|O13732|YDOC_SCHPO Uncharacterized protein C15A10.12c OS=Schizosaccharomyces pombe (strain 972 / ATCC 24843) OX=284812 GN=SPAC15A10.12c PE=4 SV=2	17.135	8.8	17002	1	2428.9
O14094	Putative exopolyphosphatase	SPAC2F3.11	3.4309	203	sp|O14094|PPX1_SCHPO Putative exopolyphosphatase OS=Schizosaccharomyces pombe (strain 972 / ATCC 24843) OX=284812 GN=SPAC2F3.11 PE=3 SV=1	43.296	4.9	45996	1	2420.8
Q10170	Protein arginine N-methyltransferase 2	rmt2	3.7931	1325	sp|Q10170|RMT2_SCHPO Protein arginine N-methyltransferase 2 OS=Schizosaccharomyces pombe (strain 972 / ATCC 24843) OX=284812 GN=rmt2 PE=3 SV=2	40.708	2.8	42498	1	2361
O14265	V-type proton ATPase subunit H	vma13	23.461	250	sp|O14265|VATH_SCHPO V-type proton ATPase subunit H OS=Schizosaccharomyces pombe (strain 972 / ATCC 24843) OX=284812 GN=vma13 PE=3 SV=2	51.436	9.1	58701	1	2348
O60166	Nuclear movement protein nudc	nudc	7.1247	490	sp|O60166|NUDC_SCHPO Nuclear movement protein nudc OS=Schizosaccharomyces pombe (strain 972 / ATCC 24843) OX=284812 GN=nudc PE=3 SV=1	19.443	8.4	28072	1	2339.4
Q9USN8	Ribosome quality control complex subunit 2	mtr1	15.07	1689	sp|Q9USN8|RQC2_SCHPO Ribosome quality control complex subunit 2 OS=Schizosaccharomyces pombe (strain 972 / ATCC 24843) OX=284812 GN=mtr1 PE=1 SV=2	114.24	9.3	83932	3	2331.5
O13771	Uncharacterized protein C17A5.09c	SPAC17A5.09c	5.2822	92	sp|O13771|YE99_SCHPO Uncharacterized protein C17A5.09c OS=Schizosaccharomyces pombe (strain 972 / ATCC 24843) OX=284812 GN=SPAC17A5.09c PE=1 SV=1	34.978	7.4	34851	1	2323.4
P36601	DNA repair protein rhp51	rhp51	6.0439	962	sp|P36601|RAD51_SCHPO DNA repair protein rhp51 OS=Schizosaccharomyces pombe (strain 972 / ATCC 24843) OX=284812 GN=rhp51 PE=1 SV=1	39.823	4.1	32527	1	2323.3
O43042	54S ribosomal protein L3, mitochondrial	mrpl3	7.6633	378	sp|O43042|RM03_SCHPO 54S ribosomal protein L3, mitochondrial OS=Schizosaccharomyces pombe (strain 972 / ATCC 24843) OX=284812 GN=mrpl3 PE=3 SV=1	37.195	5.8	37163	1	2322.7
Q9P7W7	Uncharacterized ARM-like repeat-containing protein C1703.03c	SPBC1703.03c	3.7293	1622	sp|Q9P7W7|YGQ3_SCHPO Uncharacterized ARM-like repeat-containing protein C1703.03c OS=Schizosaccharomyces pombe (strain 972 / ATCC 24843) OX=284812 GN=SPBC1703.03c PE=4 SV=1	74.81	4.2	52897	2	2299.9
Q09751	Lactoylglutathione lyase	glo1	8.592	1219	sp|Q09751|LGUL_SCHPO Lactoylglutathione lyase OS=Schizosaccharomyces pombe (strain 972 / ATCC 24843) OX=284812 GN=glo1 PE=1 SV=1	34.41	19.9	39049	2	2297
P87317	Uncharacterized protein C31F10.16	SPBC31F10.16	10.322	1150	sp|P87317|YB2G_SCHPO Uncharacterized protein C31F10.16 OS=Schizosaccharomyces pombe (strain 972 / ATCC 24843) OX=284812 GN=SPBC31F10.16 PE=4 SV=2	74.094	7.1	93384	4	2277.6
P36586	GTP-binding protein ypt5	ypt5	7.0768	955	sp|P36586|YPT5_SCHPO GTP-binding protein ypt5 OS=Schizosaccharomyces pombe (strain 972 / ATCC 24843) OX=284812 GN=ypt5 PE=1 SV=1	22.985	17.1	31832	1	2273.7
Q9USZ4	DNA-directed RNA polymerase I subunit rpa34	rpa34	6.273	1719	sp|Q9USZ4|RPA34_SCHPO DNA-directed RNA polymerase I subunit rpa34 OS=Schizosaccharomyces pombe (strain 972 / ATCC 24843) OX=284812 GN=rpa34 PE=1 SV=1	28.01	15.1	27171	1	2264.2
Q9UT00	Uncharacterized protein PYUK71.03c	SPAPYUK71.03c	40.162	1722	sp|Q9UT00|YKH3_SCHPO Uncharacterized protein PYUK71.03c OS=Schizosaccharomyces pombe (strain 972 / ATCC 24843) OX=284812 GN=SPAPYUK71.03c PE=1 SV=1	135.78	6.8	119340	4	2251.8
O94548	Maintenance of telomere capping protein 1	SPCC1322.09	9.1781	794	sp|O94548|MTC1_SCHPO Maintenance of telomere capping protein 1 OS=Schizosaccharomyces pombe (strain 972 / ATCC 24843) OX=284812 GN=SPCC1322.09 PE=3 SV=1	50.886	9.5	42566	2	2240.3
O94393	Probable 26S proteasome regulatory subunit p27	nas2	7.5229	750	sp|O94393|PSMD9_SCHPO Probable 26S proteasome regulatory subunit p27 OS=Schizosaccharomyces pombe (strain 972 / ATCC 24843) OX=284812 GN=nas2 PE=3 SV=1	23.891	7.5	24599	1	2236.3
O13752	Uncharacterized TLC domain-containing protein C17A2.02c	SPAC17A2.02c	7.4449	87	sp|O13752|YF22_SCHPO Uncharacterized TLC domain-containing protein C17A2.02c OS=Schizosaccharomyces pombe (strain 972 / ATCC 24843) OX=284812 GN=SPAC17A2.02c PE=4 SV=1	33.042	7.9	24400	1	2218.2
Q9P791	Uncharacterized Nudix hydrolase P35G2.12	SPBP35G2.12	5.0728	1570	sp|Q9P791|YN8C_SCHPO Uncharacterized Nudix hydrolase P35G2.12 OS=Schizosaccharomyces pombe (strain 972 / ATCC 24843) OX=284812 GN=SPBP35G2.12 PE=3 SV=1	23.032	19	24364	1	2214.9
O13880	Vitamin H transporter 1	vht1	5.1797	136	sp|O13880|VHT1_SCHPO Vitamin H transporter 1 OS=Schizosaccharomyces pombe (strain 972 / ATCC 24843) OX=284812 GN=vht1 PE=2 SV=1	62.821	4.8	42023	1	2211.7
Q10081	UPF0039 protein C11D3.02c	SPAC11D3.02c	44.334	1296	sp|Q10081|YAO2_SCHPO UPF0039 protein C11D3.02c OS=Schizosaccharomyces pombe (strain 972 / ATCC 24843) OX=284812 GN=SPAC11D3.02c PE=3 SV=1	17.414	39.3	26419	1	2201.6
O94699	Mitochondrial outer membrane protein C83.16c	SPBC83.16c	20.806	840	sp|O94699|IML2_SCHPO Inclusion body clearance protein IML2 OS=Schizosaccharomyces pombe (strain 972 / ATCC 24843) OX=284812 GN=SPBC83.16c PE=3 SV=1	63.484	12.3	54963	2	2198.5
Q9URW7	Vacuolar protein sorting-associated protein 17	vps17	5.7965	1644	sp|Q9URW7|VPS17_SCHPO Vacuolar protein sorting-associated protein 17 OS=Schizosaccharomyces pombe (strain 972 / ATCC 24843) OX=284812 GN=vps17 PE=3 SV=1	60.92	5.5	39449	2	2191.6
Q09195	Delta(14)-sterol reductase	erg24	5.8665	1180	sp|Q09195|ERG24_SCHPO Delta(14)-sterol reductase OS=Schizosaccharomyces pombe (strain 972 / ATCC 24843) OX=284812 GN=erg24 PE=2 SV=1	48.56	3.5	24025	1	2184.1
Q8TFH3	Dolichyl-diphosphooligosaccharide--protein glycosyltransferase subunit 3	ost3	7.3252	1438	sp|Q8TFH3|OST3_SCHPO Dolichyl-diphosphooligosaccharide--protein glycosyltransferase subunit 3 OS=Schizosaccharomyces pombe (strain 972 / ATCC 24843) OX=284812 GN=ost3 PE=3 SV=1	34.983	14.2	32679	1	2178.6
Q9Y7N0	SWR1 complex bromodomain subunit bdf1	bdf1	48.908	1869	sp|Q9Y7N0|BDF1_SCHPO SWR1 complex bromodomain subunit bdf1 OS=Schizosaccharomyces pombe (strain 972 / ATCC 24843) OX=284812 GN=bdf1 PE=1 SV=1	65.192	11.2	58788	2	2177.3
P40900	Sexual differentiation process protein isp4	isp4	9.8376	997	sp|P40900|ISP4_SCHPO Sexual differentiation process protein isp4 OS=Schizosaccharomyces pombe (strain 972 / ATCC 24843) OX=284812 GN=isp4 PE=2 SV=2	89.191	3.3	39003	1	2166.8
Q09787	Uncharacterized protein C13G6.09	SPAC13G6.09	3.9676	1233	sp|Q09787|YA99_SCHPO Uncharacterized protein C13G6.09 OS=Schizosaccharomyces pombe (strain 972 / ATCC 24843) OX=284812 GN=SPAC13G6.09 PE=4 SV=1	31.089	10.6	28141	2	2164.7
O42945	Probable pre-mRNA-splicing factor ATP-dependent RNA helicase prp43	prp43	18.39	355	sp|O42945|DHX15_SCHPO Probable pre-mRNA-splicing factor ATP-dependent RNA helicase prp43 OS=Schizosaccharomyces pombe (strain 972 / ATCC 24843) OX=284812 GN=prp43 PE=3 SV=1	83.803	15.2	88476	4	2158
Q10333	Peroxisomal biogenesis factor 11	pex11	57.437	1381	sp|Q10333|PEX11_SCHPO Peroxisomal biogenesis factor 11 OS=Schizosaccharomyces pombe (strain 972 / ATCC 24843) OX=284812 GN=pex11 PE=3 SV=2	26.478	45.8	36533	1	2149
O60062	Homoserine O-acetyltransferase	met6	15.599	457	sp|O60062|MET2_SCHPO Homoserine O-acetyltransferase OS=Schizosaccharomyces pombe (strain 972 / ATCC 24843) OX=284812 GN=met6 PE=3 SV=1	54.31	11.9	49250	1	2141.3
Q9HFE5	AP-1 complex subunit mu-1	apm1	2.575	1499	sp|Q9HFE5|AP1M1_SCHPO AP-1 complex subunit mu-1 OS=Schizosaccharomyces pombe (strain 972 / ATCC 24843) OX=284812 GN=apm1 PE=1 SV=1	48.955	3.3	46989	1	2135.9
Q9US43	Putative uracil phosphoribosyltransferase urg2	urg2	21.325	1667	sp|Q9US43|UPP3_SCHPO Putative uracil phosphoribosyltransferase urg2 OS=Schizosaccharomyces pombe (strain 972 / ATCC 24843) OX=284812 GN=urg2 PE=3 SV=2	22.083	22.5	23346	2	2122.4
Q10175	Probable peptidyl-prolyl cis-trans isomerase C27F1.06c	SPAC27F1.06c	9.6829	1326	sp|Q10175|FKBPH_SCHPO Probable peptidyl-prolyl cis-trans isomerase C27F1.06c OS=Schizosaccharomyces pombe (strain 972 / ATCC 24843) OX=284812 GN=SPAC27F1.06c PE=1 SV=1	40.54	11	33797	1	2112.3
Q9P3U0	Probable ubiquitin carboxyl-terminal hydrolase 2	ubp2	37.449	1521	sp|Q9P3U0|UBP2_SCHPO Probable ubiquitin carboxyl-terminal hydrolase 2 OS=Schizosaccharomyces pombe (strain 972 / ATCC 24843) OX=284812 GN=ubp2 PE=1 SV=1	130.3	12.4	121940	4	2102.4
O74975	Probable choline-phosphate cytidylyltransferase	SPCC1827.02c	68.044	684	sp|O74975|PCY1_SCHPO Probable choline-phosphate cytidylyltransferase OS=Schizosaccharomyces pombe (strain 972 / ATCC 24843) OX=284812 GN=SPCC1827.02c PE=1 SV=3	41.75	14.6	37783	1	2099.1
Q9URU6	Glucan 1,3-beta-glucosidase 1	exg1	4.5757	1638	sp|Q9URU6|EXG1_SCHPO Glucan 1,3-beta-glucosidase 1 OS=Schizosaccharomyces pombe (strain 972 / ATCC 24843) OX=284812 GN=exg1 PE=2 SV=1	45.505	2.9	25036	1	2086.3
O13903	Exosome complex component rrp40	rrp40	2.8906	140	sp|O13903|RRP40_SCHPO Exosome complex component rrp40 OS=Schizosaccharomyces pombe (strain 972 / ATCC 24843) OX=284812 GN=rrp40 PE=3 SV=1	26.725	3.8	31260	1	2084
Q9UTK0	20S-pre-rRNA D-site endonuclease nob1	nob1	16.087	1785	sp|Q9UTK0|NOB1_SCHPO 20S-pre-rRNA D-site endonuclease nob1 OS=Schizosaccharomyces pombe (strain 972 / ATCC 24843) OX=284812 GN=nob1 PE=3 SV=1	43.874	8.5	39468	1	2077.3
P50528	Serine/threonine-protein kinase plo1	plo1	15.114	1035	sp|P50528|PLO1_SCHPO Serine/threonine-protein kinase plo1 OS=Schizosaccharomyces pombe (strain 972 / ATCC 24843) OX=284812 GN=plo1 PE=1 SV=1	77.301	11	66462	1	2076.9
O14273	Meiotically up-regulated protein C8C9.04	SPAC8C9.04	45.307	251	sp|O14273|YET4_SCHPO Meiotically up-regulated protein C8C9.04 OS=Schizosaccharomyces pombe (strain 972 / ATCC 24843) OX=284812 GN=SPAC8C9.04 PE=1 SV=1	67.035	15.9	49463	2	2061
Q9P6J1	Mitochondrial 2-methylisocitrate lyase	icl2	36.705	1533	sp|Q9P6J1|ACEB_SCHPO Mitochondrial 2-methylisocitrate lyase OS=Schizosaccharomyces pombe (strain 972 / ATCC 24843) OX=284812 GN=icl2 PE=3 SV=1	58.937	9.3	65829	2	2057.2
Q9P7V2	ATP-binding cassette transporter abc4	abc4	15.99	1616	sp|Q9P7V2|ABC4_SCHPO ATP-binding cassette transporter abc4 OS=Schizosaccharomyces pombe (strain 972 / ATCC 24843) OX=284812 GN=abc4 PE=3 SV=1	164.79	5.9	112860	4	2052
Q96WW6	Alpha-1,3/1,6-mannosyltransferase alg2	alg2	16.13	1465	sp|Q96WW6|ALG2_SCHPO Alpha-1,3/1,6-mannosyltransferase alg2 OS=Schizosaccharomyces pombe (strain 972 / ATCC 24843) OX=284812 GN=alg2 PE=3 SV=2	57.166	17.4	53256	2	2048.3
O59827	Glutathione S-transferase 2	gst2	4.0903	447	sp|O59827|GST2_SCHPO Glutathione S-transferase 2 OS=Schizosaccharomyces pombe (strain 972 / ATCC 24843) OX=284812 GN=gst2 PE=2 SV=1	26.843	7.8	24448	1	2037.3
O13811	Protein disulfide-isomerase C17H9.14c	SPAC17H9.14c	30.701	111	sp|O13811|PDI2_SCHPO Protein disulfide-isomerase C17H9.14c OS=Schizosaccharomyces pombe (strain 972 / ATCC 24843) OX=284812 GN=SPAC17H9.14c PE=3 SV=1	40.691	21.7	38479	1	2025.2
Q10499	Apoptosis-inducing factor 1	aif1	26.237	1417	sp|Q10499|AIF1_SCHPO Apoptosis-inducing factor 1 OS=Schizosaccharomyces pombe (strain 972 / ATCC 24843) OX=284812 GN=aif1 PE=3 SV=3	66.565	11.9	80783	3	2019.6
O13693	Uncharacterized protein C11E3.14	SPAC11E3.14	17.636	76	sp|O13693|YDYE_SCHPO Uncharacterized protein C11E3.14 OS=Schizosaccharomyces pombe (strain 972 / ATCC 24843) OX=284812 GN=SPAC11E3.14 PE=2 SV=1	67.09	5.1	54519	2	2019.2
P07657	Cytochrome c oxidase subunit 1	cox1	10.763	861	sp|P07657|COX1_SCHPO Cytochrome c oxidase subunit 1 OS=Schizosaccharomyces pombe (strain 972 / ATCC 24843) OX=284812 GN=cox1 PE=3 SV=4	59.411	4.8	14130	1	2018.5
O42915	Ubiquitin fusion degradation protein 1	ufd1	5.7717	339	sp|O42915|UFD1_SCHPO Ubiquitin fusion degradation protein 1 OS=Schizosaccharomyces pombe (strain 972 / ATCC 24843) OX=284812 GN=ufd1 PE=2 SV=4	38.226	7.3	49700	1	1988
O00084	Urease	ure1	60.569	50	sp|O00084|UREA_SCHPO Urease OS=Schizosaccharomyces pombe (strain 972 / ATCC 24843) OX=284812 GN=ure1 PE=1 SV=1	91.181	8.9	69240	2	1978.3
Q9UT27	Pyruvyl transferase 1	pvg1	30.501	1733	sp|Q9UT27|PVG1_SCHPO Pyruvyl transferase 1 OS=Schizosaccharomyces pombe (strain 972 / ATCC 24843) OX=284812 GN=pvg1 PE=1 SV=1	44.871	21.4	37550	1	1976.3
Q09803	Suppressor protein of bem1/bed5 double mutants	vps4	19.251	1240	sp|Q09803|VPS4_SCHPO Suppressor protein of bem1/bed5 double mutants OS=Schizosaccharomyces pombe (strain 972 / ATCC 24843) OX=284812 GN=vps4 PE=3 SV=1	48.401	13.9	53143	2	1968.3
Q9URW9	Putative aldehyde dehydrogenase-like protein C922.07c	SPAC922.07c	28.696	1645	sp|Q9URW9|YLX7_SCHPO Putative aldehyde dehydrogenase-like protein C922.07c OS=Schizosaccharomyces pombe (strain 972 / ATCC 24843) OX=284812 GN=SPAC922.07c PE=3 SV=1	54.027	13.1	60833	2	1962.3
P40377	DNA replication licensing factor mcm2	mcm2	66.774	991	sp|P40377|MCM2_SCHPO DNA replication licensing factor mcm2 OS=Schizosaccharomyces pombe (strain 972 / ATCC 24843) OX=284812 GN=mcm2 PE=1 SV=1	92.83	12.8	90156	3	1959.9
O74948	Transcription initiation factor IIA subunit 2	toa2	14.37	674	sp|O74948|T2AG_SCHPO Transcription initiation factor IIA subunit 2 OS=Schizosaccharomyces pombe (strain 972 / ATCC 24843) OX=284812 GN=toa2 PE=3 SV=2	12.584	17.4	17597	1	1955.2
Q10368	Uncharacterized protein C22E12.18	SPAC22E12.18	3.8327	1394	sp|Q10368|YDBI_SCHPO Uncharacterized protein C22E12.18 OS=Schizosaccharomyces pombe (strain 972 / ATCC 24843) OX=284812 GN=SPAC22E12.18 PE=1 SV=1	38.445	8.3	39090	1	1954.5
P50527	Serine/threonine-protein kinase shk1/pak1	shk1	6.8712	1034	sp|P50527|STE20_SCHPO Serine/threonine-protein kinase shk1/pak1 OS=Schizosaccharomyces pombe (strain 972 / ATCC 24843) OX=284812 GN=shk1 PE=1 SV=2	72.357	11.7	75858	3	1945.1
O13936	Transcription elongation factor spt5	spt5	71.645	151	sp|O13936|SPT5_SCHPO Transcription elongation factor spt5 OS=Schizosaccharomyces pombe (strain 972 / ATCC 24843) OX=284812 GN=spt5 PE=1 SV=1	109.01	12.2	104500	5	1935.1
O13871	Uncharacterized methyltransferase C1B3.06c	SPAC1B3.06c	34.776	134	sp|O13871|YE16_SCHPO Uncharacterized methyltransferase C1B3.06c OS=Schizosaccharomyces pombe (strain 972 / ATCC 24843) OX=284812 GN=SPAC1B3.06c PE=3 SV=1	31.773	28.1	28944	1	1929.6
O94401	L-type lectin-like domain-containing protein C126.08c	SPCC126.08c	77.469	753	sp|O94401|YQF8_SCHPO L-type lectin-like domain-containing protein C126.08c OS=Schizosaccharomyces pombe (strain 972 / ATCC 24843) OX=284812 GN=SPCC126.08c PE=3 SV=1	35.128	21.8	32578	2	1916.3
Q9UT29	Uncharacterized protein C8F11.08c	SPAC8F11.08c	13.906	1734	sp|Q9UT29|YKGC_SCHPO Uncharacterized protein C8F11.08c OS=Schizosaccharomyces pombe (strain 972 / ATCC 24843) OX=284812 GN=SPAC8F11.08c PE=4 SV=1	41.754	4.8	34364	1	1909.1
O13989	Uncharacterized protein C26H5.07c	SPAC26H5.07c	31.489	165	sp|O13989|YEG7_SCHPO Uncharacterized protein C26H5.07c OS=Schizosaccharomyces pombe (strain 972 / ATCC 24843) OX=284812 GN=SPAC26H5.07c PE=3 SV=2	56.858	5.1	28613	2	1907.5
O36033	TPR repeat-containing protein C19B12.01		39.205	300	sp|O36033|YLM1_SCHPO TPR repeat-containing protein C19B12.01 OS=Schizosaccharomyces pombe (strain 972 / ATCC 24843) OX=284812 GN=SPAC19B12.01 PE=4 SV=2	94.268	14.7	91498	4	1906.2
O14284	Oxidation resistance protein 1	oxr1	4.1568	254	sp|O14284|OXR1_SCHPO Oxidation resistance protein 1 OS=Schizosaccharomyces pombe (strain 972 / ATCC 24843) OX=284812 GN=oxr1 PE=1 SV=1	21.454	10.1	17145	1	1905.1
Q10243	Vacuolar protein sorting-associated protein 26	vps26	2.6661	1353	sp|Q10243|VPS26_SCHPO Vacuolar protein sorting-associated protein 26 OS=Schizosaccharomyces pombe (strain 972 / ATCC 24843) OX=284812 GN=vps26 PE=3 SV=1	35.779	16.8	36155	1	1902.9
Q09729	Arrestin domain-containing protein C31A2.12	SPAC31A2.12	14.172	1207	sp|Q09729|YA4C_SCHPO Arrestin domain-containing protein C31A2.12 OS=Schizosaccharomyces pombe (strain 972 / ATCC 24843) OX=284812 GN=SPAC31A2.12 PE=1 SV=1	65.902	3	43376	1	1885.9
Q9Y7U0	Uncharacterized protein C63.14	SPCC63.14	19.959	1882	sp|Q9Y7U0|YCJE_SCHPO Uncharacterized protein C63.14 OS=Schizosaccharomyces pombe (strain 972 / ATCC 24843) OX=284812 GN=SPCC63.14 PE=1 SV=1	131.06	9.9	120610	3	1884.6
Q10283	3-hydroxy-3-methylglutaryl-coenzyme A reductase	hmg1	24.623	1363	sp|Q10283|HMDH_SCHPO 3-hydroxy-3-methylglutaryl-coenzyme A reductase OS=Schizosaccharomyces pombe (strain 972 / ATCC 24843) OX=284812 GN=hmg1 PE=1 SV=2	114.88	11.7	78373	2	1866
Q9C1X5	Uncharacterized oxidoreductase P32A8.02	SPAP32A8.02	5.4713	1483	sp|Q9C1X5|YKW2_SCHPO Uncharacterized oxidoreductase P32A8.02 OS=Schizosaccharomyces pombe (strain 972 / ATCC 24843) OX=284812 GN=SPAP32A8.02 PE=3 SV=1	31.832	11.3	27884	2	1858.9
Q9UTI7	Probable thymidylate synthase	SPAC15E1.04	4.3384	1780	sp|Q9UTI7|TYSY_SCHPO Probable thymidylate synthase OS=Schizosaccharomyces pombe (strain 972 / ATCC 24843) OX=284812 GN=SPAC15E1.04 PE=3 SV=1	69.893	5	48248	2	1855.7
O74956	37S ribosomal protein subunit S8, mitochondrial	mrps8	1.7232	675	sp|O74956|RT08_SCHPO 37S ribosomal protein subunit S8, mitochondrial OS=Schizosaccharomyces pombe (strain 972 / ATCC 24843) OX=284812 GN=mrps8 PE=3 SV=1	16.937	9.2	14842	1	1855.3
Q9HDX8	D-arabinono-1,4-lactone oxidase	alo1	15.229	1488	sp|Q9HDX8|ALO_SCHPO D-arabinono-1,4-lactone oxidase OS=Schizosaccharomyces pombe (strain 972 / ATCC 24843) OX=284812 GN=alo1 PE=3 SV=1	52.027	10.2	33381	2	1854.5
O74398	LIM domain-containing protein C4F6.12	SPBC4F6.12	14.107	530	sp|O74398|YOCC_SCHPO LIM domain-containing protein C4F6.12 OS=Schizosaccharomyces pombe (strain 972 / ATCC 24843) OX=284812 GN=SPBC4F6.12 PE=1 SV=1	49.03	3.7	33112	1	1839.5
Q9UUB6	Ubiquitin carboxyl-terminal hydrolase 2	uch2	2.5227	1821	sp|Q9UUB6|UBLH2_SCHPO Ubiquitin carboxyl-terminal hydrolase 2 OS=Schizosaccharomyces pombe (strain 972 / ATCC 24843) OX=284812 GN=uch2 PE=1 SV=1	34.195	2.7	27542	1	1836.1
O14034	Uncharacterized lyase C29B12.13	SPAC29B12.13	2.55	180	sp|O14034|YEMD_SCHPO Uncharacterized lyase C29B12.13 OS=Schizosaccharomyces pombe (strain 972 / ATCC 24843) OX=284812 GN=SPAC29B12.13 PE=3 SV=1	15.56	8	20175	1	1834.1
Q9P804	tRNA (guanine(26)-N(2))-dimethyltransferase	trm1	7.1903	1630	sp|Q9P804|TRM1_SCHPO tRNA (guanine(26)-N(2))-dimethyltransferase OS=Schizosaccharomyces pombe (strain 972 / ATCC 24843) OX=284812 GN=trm1 PE=1 SV=1	60.297	10.6	45824	2	1833
O60096	37S ribosomal protein S35, mitochondrial	bot1	8.5483	467	sp|O60096|RT35_SCHPO 37S ribosomal protein S35, mitochondrial OS=Schizosaccharomyces pombe (strain 972 / ATCC 24843) OX=284812 GN=bot1 PE=2 SV=1	35.752	4.4	40303	1	1832
Q8WZK4	Defective in cullin neddylation protein 1	dcn1	9.665	1442	sp|Q8WZK4|DCN1_SCHPO Defective in cullin neddylation protein 1 OS=Schizosaccharomyces pombe (strain 972 / ATCC 24843) OX=284812 GN=dcn1 PE=3 SV=1	28.915	7.6	23785	1	1829.6
Q9UT53	Nicotinamide/nicotinic acid mononucleotide adenylyltransferase	SPAC806.06c	71.727	1741	sp|Q9UT53|NMAH_SCHPO Nicotinamide/nicotinic acid mononucleotide adenylyltransferase OS=Schizosaccharomyces pombe (strain 972 / ATCC 24843) OX=284812 GN=SPAC806.06c PE=1 SV=2	42.149	27.4	38404	1	1828.8
Q9UTP0	60S ribosomal protein L30-2	rpl30b	1.7943	1795	sp|Q9UTP0|RL30B_SCHPO 60S ribosomal protein L30-2 OS=Schizosaccharomyces pombe (strain 972 / ATCC 24843) OX=284812 GN=rpl3002 PE=3 SV=1	12.242	20.5	10952	1	1825.3
O74471	Cytochrome c oxidase subunit 6A, mitochondrial	cox13	8.8831	556	sp|O74471|COX13_SCHPO Cytochrome c oxidase subunit 13, mitochondrial OS=Schizosaccharomyces pombe (strain 972 / ATCC 24843) OX=284812 GN=cox13 PE=3 SV=1	15.199	21.5	14457	1	1807.1
O74452	Cell wall integrity protein scw1	scw1	5.2276	550	sp|O74452|SCW1_SCHPO Cell wall integrity protein scw1 OS=Schizosaccharomyces pombe (strain 972 / ATCC 24843) OX=284812 GN=scw1 PE=1 SV=1	60.393	9.1	43365	1	1806.9
O94300	Putative xanthine/uracil permease C887.17	SPBC887.17	8.0566	714	sp|O94300|YOOH_SCHPO Putative xanthine/uracil permease C887.17 OS=Schizosaccharomyces pombe (strain 972 / ATCC 24843) OX=284812 GN=SPBC887.17 PE=3 SV=1	68.562	4	28875	1	1804.7
O94289	Ubiquitin homeostasis protein lub1	lub1	38.84	711	sp|O94289|LUB1_SCHPO Ubiquitin homeostasis protein lub1 OS=Schizosaccharomyces pombe (strain 972 / ATCC 24843) OX=284812 GN=lub1 PE=1 SV=2	79.221	12.4	48483	3	1795.7
O94335	Dolichyl-diphosphooligosaccharide--protein glycosyltransferase subunit stt3	stt3	31.29	730	sp|O94335|STT3_SCHPO Dolichyl-diphosphooligosaccharide--protein glycosyltransferase subunit stt3 OS=Schizosaccharomyces pombe (strain 972 / ATCC 24843) OX=284812 GN=stt3 PE=3 SV=1	84.973	12.4	53845	2	1794.8
O13861	tRNA threonylcarbamoyladenosine dehydratase		42.228	129	sp|O13861|TCD_SCHPO tRNA threonylcarbamoyladenosine dehydratase OS=Schizosaccharomyces pombe (strain 972 / ATCC 24843) OX=284812 GN=SPAC1A6.10 PE=3 SV=1	54.299	17.5	50134	2	1790.5
O74856	Poly(A) ribonuclease pop2	caf1	8.0985	638	sp|O74856|CAF1_SCHPO Poly(A) ribonuclease pop2 OS=Schizosaccharomyces pombe (strain 972 / ATCC 24843) OX=284812 GN=caf1 PE=1 SV=2	37.533	3.9	21425	1	1785.4
O13844	Uncharacterized mitochondrial carrier C19G12.05	SPAC19G12.05	32.835	121	sp|O13844|YFG5_SCHPO Uncharacterized mitochondrial carrier C19G12.05 OS=Schizosaccharomyces pombe (strain 972 / ATCC 24843) OX=284812 GN=SPAC19G12.05 PE=3 SV=1	31.573	18.9	32047	2	1780.4
O74549	NEDD8-conjugating enzyme ubc12	ubc12	3.8978	585	sp|O74549|UBC12_SCHPO NEDD8-conjugating enzyme ubc12 OS=Schizosaccharomyces pombe (strain 972 / ATCC 24843) OX=284812 GN=ubc12 PE=3 SV=1	20.062	9	15981	1	1775.7
O59816	Dihydrolipoyllysine-residue acetyltransferase component of pyruvate dehydrogenase complex, mitochondrial	lat1	21.714	441	sp|O59816|ODP2_SCHPO Dihydrolipoyllysine-residue acetyltransferase component of pyruvate dehydrogenase complex, mitochondrial OS=Schizosaccharomyces pombe (strain 972 / ATCC 24843) OX=284812 GN=lat1 PE=3 SV=1	52.06	13.7	47769	1	1769.2
Q9Y7M8	Probable RNA exonuclease C9B6.11c	SPBC9B6.11c	12.145	1868	sp|Q9Y7M8|YNTB_SCHPO Probable RNA exonuclease C9B6.11c OS=Schizosaccharomyces pombe (strain 972 / ATCC 24843) OX=284812 GN=SPBC9B6.11c PE=3 SV=1	57.65	13.9	49529	2	1768.9
O59735	Sphingosine N-acyltransferase lac1	lac1	13.883	417	sp|O59735|LAC1_SCHPO Sphingosine N-acyltransferase lac1 OS=Schizosaccharomyces pombe (strain 972 / ATCC 24843) OX=284812 GN=lac1 PE=1 SV=2	45.335	4.7	28015	1	1751
O14307	tRNA (adenine(58)-N(1))-methyltransferase catalytic subunit trm61	cpd1	54.017	262	sp|O14307|TRM61_SCHPO tRNA (adenine(58)-N(1))-methyltransferase catalytic subunit trm61 OS=Schizosaccharomyces pombe (strain 972 / ATCC 24843) OX=284812 GN=cpd1 PE=3 SV=1	41.733	15.1	39886	2	1734.2
Q9Y7P4	54S ribosomal protein rml2, mitochondrial	rml2	20.95	1875	sp|Q9Y7P4|RML2_SCHPO 54S ribosomal protein rml2, mitochondrial OS=Schizosaccharomyces pombe (strain 972 / ATCC 24843) OX=284812 GN=rml2 PE=3 SV=2	40.246	16.9	34518	2	1725.9
Q09868	RNA-binding post-transcriptional regulator cip2	cip2	11.23	1261	sp|Q09868|CIP2_SCHPO RNA-binding post-transcriptional regulator cip2 OS=Schizosaccharomyces pombe (strain 972 / ATCC 24843) OX=284812 GN=cip2 PE=1 SV=1	62.068	9.7	30867	2	1714.8
P40901	Sexual differentiation process putative amino-acid permease isp5	isp5	16.76	998	sp|P40901|ISP5_SCHPO Sexual differentiation process putative amino-acid permease isp5 OS=Schizosaccharomyces pombe (strain 972 / ATCC 24843) OX=284812 GN=isp5 PE=2 SV=2	63.849	11.6	23950	1	1710.7
Q9UUA4	Translocation protein sec66	sec66	21.01	1817	sp|Q9UUA4|SEC66_SCHPO Translocation protein sec66 OS=Schizosaccharomyces pombe (strain 972 / ATCC 24843) OX=284812 GN=sec66 PE=1 SV=1	22.135	9.9	17035	1	1703.5
Q9HGN8	Survival factor 2	svf2	2.7843	1510	sp|Q9HGN8|SVF2_SCHPO Survival factor 2 OS=Schizosaccharomyces pombe (strain 972 / ATCC 24843) OX=284812 GN=svf2 PE=3 SV=1	40.333	4.5	37474	1	1703.4
O42854	SH3 domain-containing protein C23A1.17	SPAC23A1.17	52.74	319	sp|O42854|YFHH_SCHPO SH3 domain-containing protein C23A1.17 OS=Schizosaccharomyces pombe (strain 972 / ATCC 24843) OX=284812 GN=SPAC23A1.17 PE=1 SV=1	170.53	7	112340	3	1702.1
Q10206	Diphthamide biosynthesis protein 2	dph2	4.3243	1340	sp|Q10206|DPH2_SCHPO 2-(3-amino-3-carboxypropyl)histidine synthase subunit 2 OS=Schizosaccharomyces pombe (strain 972 / ATCC 24843) OX=284812 GN=dph2 PE=3 SV=1	55.635	5	45716	2	1693.2
Q10061	Heat shock protein 70 homolog lhs1	SPAC1F5.06	35.267	1292	sp|Q10061|LHS1_SCHPO Heat shock protein 70 homolog lhs1 OS=Schizosaccharomyces pombe (strain 972 / ATCC 24843) OX=284812 GN=SPAC1F5.06 PE=3 SV=1	94.897	9.8	61964	2	1674.7
Q09673	Pantoate--beta-alanine ligase	pan6	7.6833	1187	sp|Q09673|PANC_SCHPO Pantoate--beta-alanine ligase OS=Schizosaccharomyces pombe (strain 972 / ATCC 24843) OX=284812 GN=pan6 PE=3 SV=1	31.876	11	26777	1	1673.5
O74945	Ribosome assembly protein 1	ria1	13.419	672	sp|O74945|RIA1_SCHPO Ribosome assembly protein 1 OS=Schizosaccharomyces pombe (strain 972 / ATCC 24843) OX=284812 GN=ria1 PE=3 SV=1	112.13	6.7	65259	3	1673.3
Q4LB35	Folic acid synthesis protein fol1;Dihydroneopterin aldolase;2-amino-4-hydroxy-6-hydroxymethyldihydropteridine pyrophosphokinase;Dihydropteroate synthase	fol1	16.158	1430	sp|Q4LB35|FOL1_SCHPO Folic acid synthesis protein fol1 OS=Schizosaccharomyces pombe (strain 972 / ATCC 24843) OX=284812 GN=fol1 PE=1 SV=2	81.925	7.9	75261	3	1672.5
Q9P7E3	S-adenosylmethionine decarboxylase proenzyme;S-adenosylmethionine decarboxylase alpha chain;S-adenosylmethionine decarboxylase beta chain	spe2	3.3512	1579	sp|Q9P7E3|DCAM_SCHPO S-adenosylmethionine decarboxylase proenzyme OS=Schizosaccharomyces pombe (strain 972 / ATCC 24843) OX=284812 GN=spe2 PE=2 SV=1	42.712	6.9	29940	1	1663.3
Q10169	Deubiquitination-protection protein dph1	dph1	7.9052	1324	sp|Q10169|DSK2_SCHPO Deubiquitination-protection protein dph1 OS=Schizosaccharomyces pombe (strain 972 / ATCC 24843) OX=284812 GN=dph1 PE=4 SV=1	36.819	8.8	18245	1	1658.6
Q9P7W5	Serine/threonine-protein kinase rio2	rio2	15.814	1621	sp|Q9P7W5|RIO2_SCHPO Serine/threonine-protein kinase rio2 OS=Schizosaccharomyces pombe (strain 972 / ATCC 24843) OX=284812 GN=rio2 PE=3 SV=2	39.84	6.1	31313	1	1648.1
Q09841	Probable proteasome subunit beta type-2	pup1	9.7876	1250	sp|Q09841|PSB2_SCHPO Probable proteasome subunit beta type-2 OS=Schizosaccharomyces pombe (strain 972 / ATCC 24843) OX=284812 GN=pup1 PE=2 SV=1	29.337	11.2	24506	1	1633.8
P87131	Cysteine synthase 2	cys12	7.2926	1121	sp|P87131|CYSKL_SCHPO Cysteine synthase 2 OS=Schizosaccharomyces pombe (strain 972 / ATCC 24843) OX=284812 GN=cys12 PE=3 SV=1	43.086	9.4	32651	1	1632.6
O60059	Pumilio domain-containing protein C56F2.08c	SPBC56F2.08c	24.431	455	sp|O60059|YG58_SCHPO Pumilio domain-containing protein C56F2.08c OS=Schizosaccharomyces pombe (strain 972 / ATCC 24843) OX=284812 GN=SPBC56F2.08c PE=1 SV=1	72.822	10.4	53792	3	1630.1
O94466	Probable Rho-GTPase-activating protein 7	rga7	14.185	775	sp|O94466|RGA7_SCHPO Probable Rho-GTPase-activating protein 7 OS=Schizosaccharomyces pombe (strain 972 / ATCC 24843) OX=284812 GN=rga7 PE=1 SV=1	76.678	5.8	61587	2	1620.7
P04551	Cyclin-dependent kinase 1	cdc2	3.2201	850	sp|P04551|CDK1_SCHPO Cyclin-dependent kinase 1 OS=Schizosaccharomyces pombe (strain 972 / ATCC 24843) OX=284812 GN=cdc2 PE=1 SV=1	34.358	13.5	27505	1	1617.9
O59763	Serine/threonine-protein kinase oca2	oca2	17.608	424	sp|O59763|OCA2_SCHPO Serine/threonine-protein kinase oca2 OS=Schizosaccharomyces pombe (strain 972 / ATCC 24843) OX=284812 GN=oca2 PE=1 SV=1	73.231	7.5	48353	1	1611.8
P29458	DNA replication licensing factor mcm4	mcm4	108.05	928	sp|P29458|MCM4_SCHPO DNA replication licensing factor mcm4 OS=Schizosaccharomyces pombe (strain 972 / ATCC 24843) OX=284812 GN=mcm4 PE=1 SV=2	103.73	22.4	75708	2	1610.8
Q9UTI9	UPF0591 membrane protein C15E1.02c	SPAC15E1.02c	4.0853	1782	sp|Q9UTI9|YKZ2_SCHPO UPF0591 membrane protein C15E1.02c OS=Schizosaccharomyces pombe (strain 972 / ATCC 24843) OX=284812 GN=SPAC15E1.02c PE=3 SV=1	15.94	10.1	11169	1	1595.5
O14205	Vacuolar protein sorting-associated protein 74	vps74	9.5806	230	sp|O14205|VPS74_SCHPO Vacuolar protein sorting-associated protein 74 OS=Schizosaccharomyces pombe (strain 972 / ATCC 24843) OX=284812 GN=vps74 PE=1 SV=2	38.375	18.7	23880	2	1592
Q9P7T0	L-ornithine N(5)-monooxygenase	sib2	15.05	1612	sp|Q9P7T0|SIDA_SCHPO L-ornithine N(5)-monooxygenase OS=Schizosaccharomyces pombe (strain 972 / ATCC 24843) OX=284812 GN=sib2 PE=3 SV=1	48.582	14.2	30087	1	1583.5
Q9Y7P2	Uncharacterized protein C1450.15	SPCC1450.15	30.541	1874	sp|Q9Y7P2|YCKF_SCHPO Uncharacterized protein C1450.15 OS=Schizosaccharomyces pombe (strain 972 / ATCC 24843) OX=284812 GN=SPCC1450.15 PE=3 SV=2	55.643	11.3	31631	1	1581.6
O13754	Hsp70/Hsp90 co-chaperone cns1	cns1	4.6269	89	sp|O13754|CNS1_SCHPO Hsp70/Hsp90 co-chaperone cns1 OS=Schizosaccharomyces pombe (strain 972 / ATCC 24843) OX=284812 GN=cns1 PE=3 SV=1	40.531	16.5	20543	1	1580.2
Q9C0V1	Ammonium transporter 1	amt1	3.0411	1468	sp|Q9C0V1|AMT1_SCHPO Ammonium transporter 1 OS=Schizosaccharomyces pombe (strain 972 / ATCC 24843) OX=284812 GN=amt1 PE=3 SV=1	53.386	4.4	12628	1	1578.4
Q10099	Nucleoporin seh1	seh1	24.71	1300	sp|Q10099|SEH1_SCHPO Nucleoporin seh1 OS=Schizosaccharomyces pombe (strain 972 / ATCC 24843) OX=284812 GN=seh1 PE=1 SV=1	38.564	10.9	26726	1	1572.1
O43079	AP-1 complex subunit beta-1	apl2	12.512	396	sp|O43079|AP1B1_SCHPO AP-1 complex subunit beta-1 OS=Schizosaccharomyces pombe (strain 972 / ATCC 24843) OX=284812 GN=apl2 PE=1 SV=1	76.681	8.6	59551	3	1567.1
P14068	Exportin-1	xpo1	24.435	892	sp|P14068|XPO1_SCHPO Exportin-1 OS=Schizosaccharomyces pombe (strain 972 / ATCC 24843) OX=284812 GN=xpo1 PE=1 SV=3	123.57	8.3	73094	4	1555.2
O43059	Cytoskeletal protein syp1	syp1	2.5521	387	sp|O43059|SYP1_SCHPO Cytoskeletal protein syp1 OS=Schizosaccharomyces pombe (strain 972 / ATCC 24843) OX=284812 GN=syp1 PE=1 SV=1	90.756	4.8	66769	1	1552.8
Q9UT05	Tripeptidyl-peptidase 2 homolog	tpp2	7.4868	1724	sp|Q9UT05|TPP2_SCHPO Tripeptidyl-peptidase 2 homolog OS=Schizosaccharomyces pombe (strain 972 / ATCC 24843) OX=284812 GN=tpp2 PE=1 SV=1	142.92	3.8	91205	2	1545.9
Q9P7S5	Probable ubiquitin carboxyl-terminal hydrolase 7	ubp7	4.3357	1610	sp|Q9P7S5|UBP7_SCHPO Probable ubiquitin carboxyl-terminal hydrolase 7 OS=Schizosaccharomyces pombe (strain 972 / ATCC 24843) OX=284812 GN=ubp7 PE=1 SV=1	98.376	1.4	56954	1	1539.3
Q09176	Splicing factor U2AF 23 kDa subunit	SPAP8A3.06	14.424	1173	sp|Q09176|U2AF1_SCHPO Splicing factor U2AF 23 kDa subunit OS=Schizosaccharomyces pombe (strain 972 / ATCC 24843) OX=284812 GN=SPAP8A3.06 PE=1 SV=2	25.03	29.2	22986	2	1532.4
Q10184	1-(5-phosphoribosyl)-5-[(5-phosphoribosylamino)methylideneamino] imidazole-4-carboxamide isomerase	SPAC3F10.09	2.7949	1329	sp|Q10184|HIS4_SCHPO 1-(5-phosphoribosyl)-5-[(5-phosphoribosylamino)methylideneamino] imidazole-4-carboxamide isomerase OS=Schizosaccharomyces pombe (strain 972 / ATCC 24843) OX=284812 GN=SPAC3F10.09 PE=3 SV=1	29.345	12.9	21388	1	1527.7
O74821	Fe-S cluster assembly protein dre2	dre2	13.821	625	sp|O74821|DRE2_SCHPO Fe-S cluster assembly protein dre2 OS=Schizosaccharomyces pombe (strain 972 / ATCC 24843) OX=284812 GN=dre2 PE=3 SV=1	31.534	19.1	24285	2	1517.8
O94642	tRNA-specific adenosine deaminase subunit tad2	tad2	9.9536	823	sp|O94642|TAD2_SCHPO tRNA-specific adenosine deaminase subunit tad2 OS=Schizosaccharomyces pombe (strain 972 / ATCC 24843) OX=284812 GN=tad2 PE=3 SV=2	43.603	9.3	42288	2	1510.3
Q10437	UBP9-binding protein bun62	bun62	21.407	1403	sp|Q10437|BUN62_SCHPO UBP9-binding protein bun62 OS=Schizosaccharomyces pombe (strain 972 / ATCC 24843) OX=284812 GN=bun62 PE=1 SV=1	61.81	6.4	49153	2	1489.5
O14337	Probable 54S ribosomal protein L7, mitochondrial	mrpl7	5.0815	272	sp|O14337|RM07_SCHPO Probable 54S ribosomal protein L7, mitochondrial OS=Schizosaccharomyces pombe (strain 972 / ATCC 24843) OX=284812 GN=mrpl7 PE=3 SV=1	32.384	12.5	19329	1	1486.9
Q9UT57	Probable cytosolic Fe-S cluster assembly factor SPAC806.02c	SPAC806.02c	9.2801	1744	sp|Q9UT57|CFD1_SCHPO Probable cytosolic Fe-S cluster assembly factor SPAC806.02c OS=Schizosaccharomyces pombe (strain 972 / ATCC 24843) OX=284812 GN=SPAC806.02c PE=3 SV=1	67.68	6.4	35492	1	1478.8
P87126	Pre-mRNA-splicing factor cwf2	cwf2	4.8738	1119	sp|P87126|CWC2_SCHPO Pre-mRNA-splicing factor cwf2 OS=Schizosaccharomyces pombe (strain 972 / ATCC 24843) OX=284812 GN=cwf2 PE=1 SV=2	44.281	11.6	30998	1	1476.1
O74534	Protein sly1	sly1	35.469	580	sp|O74534|SLY1_SCHPO Protein sly1 OS=Schizosaccharomyces pombe (strain 972 / ATCC 24843) OX=284812 GN=sly1 PE=3 SV=1	71.664	7.8	49817	2	1465.2
Q9USP0	Translation initiation factor eIF-2B subunit alpha	tif221	7.8235	1690	sp|Q9USP0|EI2BA_SCHPO Translation initiation factor eIF-2B subunit alpha OS=Schizosaccharomyces pombe (strain 972 / ATCC 24843) OX=284812 GN=tif221 PE=1 SV=1	37.773	8.8	24715	1	1453.8
O14021	RbAp48-related WD40 repeat-containing protein prw1	prw1	2.7131	174	sp|O14021|PRW1_SCHPO RbAp48-related WD40 repeat-containing protein prw1 OS=Schizosaccharomyces pombe (strain 972 / ATCC 24843) OX=284812 GN=prw1 PE=1 SV=1	48.476	4.6	26132	1	1451.8
O94396	tRNA pseudouridine synthase 1	pus1	11.566	751	sp|O94396|PUS1_SCHPO tRNA pseudouridine synthase 1 OS=Schizosaccharomyces pombe (strain 972 / ATCC 24843) OX=284812 GN=pus1 PE=1 SV=1	60.323	9.7	47794	1	1448.3
P40848	5-3 exoribonuclease 2	dhp1	44.68	996	sp|P40848|XRN2_SCHPO 5-3 exoribonuclease 2 OS=Schizosaccharomyces pombe (strain 972 / ATCC 24843) OX=284812 GN=dhp1 PE=1 SV=1	112.37	6.6	67701	3	1440.5
O14131	Meiotically up-regulated gene 191 protein	mug191	6.1874	216	sp|O14131|MU191_SCHPO Meiotically up-regulated gene 191 protein OS=Schizosaccharomyces pombe (strain 972 / ATCC 24843) OX=284812 GN=mug191 PE=1 SV=1	49.78	2.5	29726	1	1415.5
O60185	Methylthioribose-1-phosphate isomerase	mri1	8.7237	496	sp|O60185|MTNA_SCHPO Methylthioribose-1-phosphate isomerase OS=Schizosaccharomyces pombe (strain 972 / ATCC 24843) OX=284812 GN=mri1 PE=3 SV=1	39.379	11.1	32446	1	1410.7
O60164	Pescadillo homolog	ppp1	14.48	489	sp|O60164|PESC_SCHPO Pescadillo homolog OS=Schizosaccharomyces pombe (strain 972 / ATCC 24843) OX=284812 GN=ppp1 PE=3 SV=1	69.188	3.5	36451	2	1402
Q02061	DNA-directed RNA polymerase II subunit RPB2	rpb2	61.556	1156	sp|Q02061|RPB2_SCHPO DNA-directed RNA polymerase II subunit RPB2 OS=Schizosaccharomyces pombe (strain 972 / ATCC 24843) OX=284812 GN=rpb2 PE=1 SV=2	137.85	11	85426	3	1400.4
P40233	Casein kinase I homolog 1	cki1	3.3069	981	sp|P40233|CKI1_SCHPO Casein kinase I homolog 1 OS=Schizosaccharomyces pombe (strain 972 / ATCC 24843) OX=284812 GN=cki1 PE=1 SV=2	50.424	14.1	29305	3	1395.5
O94626	Probable oligoribonuclease	rex2	6.3628	818	sp|O94626|ORN_SCHPO Probable oligoribonuclease OS=Schizosaccharomyces pombe (strain 972 / ATCC 24843) OX=284812 GN=rex2 PE=3 SV=2	29.286	6.3	24592	1	1366.2
O94465	Protein cms1	cms1	8.3534	774	sp|O94465|CMS1_SCHPO Protein cms1 OS=Schizosaccharomyces pombe (strain 972 / ATCC 24843) OX=284812 GN=cms1 PE=3 SV=1	31.625	5.1	16384	1	1365.3
O94533	Elongator complex protein 2	elp2	12.091	791	sp|O94533|ELP2_SCHPO Elongator complex protein 2 OS=Schizosaccharomyces pombe (strain 972 / ATCC 24843) OX=284812 GN=elp2 PE=3 SV=1	84.948	12.8	48811	2	1355.9
Q92367	Amino-acid permease 1	aap1	2.2004	1451	sp|Q92367|AAP1_SCHPO Amino-acid permease 1 OS=Schizosaccharomyces pombe (strain 972 / ATCC 24843) OX=284812 GN=aap1 PE=3 SV=1	65.277	1.9	22942	1	1349.5
P47979	Zinc finger protein zfs1	zfs1	5.4137	1021	sp|P47979|ZFS1_SCHPO Zinc finger protein zfs1 OS=Schizosaccharomyces pombe (strain 972 / ATCC 24843) OX=284812 GN=zfs1 PE=1 SV=1	43.435	12.1	22760	1	1338.8
O59672	Uncharacterized ABC transporter ATP-binding protein C29A3.09c	SPBC29A3.09c	22.917	401	sp|O59672|YB89_SCHPO Uncharacterized ABC transporter ATP-binding protein C29A3.09c OS=Schizosaccharomyces pombe (strain 972 / ATCC 24843) OX=284812 GN=SPBC29A3.09c PE=3 SV=1	83.761	10.2	48144	2	1337.3
Q9UT34	Uncharacterized protein C824.09c	SPAC824.09c	2.5137	1735	sp|Q9UT34|YIQ9_SCHPO Uncharacterized protein C824.09c OS=Schizosaccharomyces pombe (strain 972 / ATCC 24843) OX=284812 GN=SPAC824.09c PE=4 SV=1	35.109	7.8	21357	1	1334.8
Q9USJ3	Uncharacterized protein C4B3.03c	SPCC4B3.03c	2.6329	1677	sp|Q9USJ3|YJ23_SCHPO Uncharacterized protein C4B3.03c OS=Schizosaccharomyces pombe (strain 972 / ATCC 24843) OX=284812 GN=SPCC4B3.03c PE=1 SV=1	74.305	2.5	34624	1	1331.7
P78798	Peroxisomal targeting signal 2 receptor	pex7	19.384	1064	sp|P78798|PEX7_SCHPO Peroxisomal targeting signal 2 receptor OS=Schizosaccharomyces pombe (strain 972 / ATCC 24843) OX=284812 GN=pex7 PE=2 SV=2	34.588	14	22636	1	1331.5
Q9US20	Uncharacterized acyltransferase C1851.02	SPAC1851.02	10.753	1659	sp|Q9US20|YLD2_SCHPO Uncharacterized acyltransferase C1851.02 OS=Schizosaccharomyces pombe (strain 972 / ATCC 24843) OX=284812 GN=SPAC1851.02 PE=3 SV=1	31.393	11.5	18512	1	1322.3
O14089	Importin subunit beta-2	kap104	4.1565	201	sp|O14089|IMB2_SCHPO Importin subunit beta-2 OS=Schizosaccharomyces pombe (strain 972 / ATCC 24843) OX=284812 GN=kap104 PE=3 SV=1	101.72	2.9	40713	1	1313.3
O74782	Universal stress protein A family protein C25B2.10	SPBC25B2.10	10.332	613	sp|O74782|YGBA_SCHPO Universal stress protein A family protein C25B2.10 OS=Schizosaccharomyces pombe (strain 972 / ATCC 24843) OX=284812 GN=SPBC25B2.10 PE=1 SV=1	34.082	18.2	26170	1	1308.5
Q10483	Uncharacterized protein C17C9.11c	SPAC17C9.11c	1.6522	1411	sp|Q10483|YDFB_SCHPO Uncharacterized protein C17C9.11c OS=Schizosaccharomyces pombe (strain 972 / ATCC 24843) OX=284812 GN=SPAC17C9.11c PE=4 SV=2	27.602	6.7	20821	1	1301.3
Q9UU81	AP-1 complex subunit gamma-1	apl4	7.3099	1810	sp|Q9UU81|AP1G1_SCHPO AP-1 complex subunit gamma-1 OS=Schizosaccharomyces pombe (strain 972 / ATCC 24843) OX=284812 GN=apl4 PE=3 SV=1	96.04	3.5	57258	2	1301.3
Q9URZ7	Probable fructose-2,6-bisphosphatase C732.02c	SPAC732.02c	6.0665	1654	sp|Q9URZ7|YK72_SCHPO Probable fructose-2,6-bisphosphatase C732.02c OS=Schizosaccharomyces pombe (strain 972 / ATCC 24843) OX=284812 GN=SPAC732.02c PE=3 SV=1	46.947	9.1	32475	1	1299
Q09911	Uncharacterized protein C30D11.14c	SPAC30D11.14c	6.4324	1277	sp|Q09911|YAJE_SCHPO Uncharacterized protein C30D11.14c OS=Schizosaccharomyces pombe (strain 972 / ATCC 24843) OX=284812 GN=SPAC30D11.14c PE=4 SV=1	59.035	2.8	28478	1	1294.4
O59791	Serine racemase	SRR	43.848	433	sp|O59791|SRR_SCHPO Serine racemase OS=Schizosaccharomyces pombe (strain 972 / ATCC 24843) OX=284812 GN=SRR PE=1 SV=1	35.048	34.1	21877	1	1286.9
O59813	Uncharacterized amino-acid permease C794.03	SPCC794.03	32.756	440	sp|O59813|YCT3_SCHPO Uncharacterized amino-acid permease C794.03 OS=Schizosaccharomyces pombe (strain 972 / ATCC 24843) OX=284812 GN=SPCC794.03 PE=2 SV=1	60.857	8.5	26987	1	1285.1
Q10071	Probable CAAX prenyl protease 1	SPAC3H1.05	53.417	1294	sp|Q10071|STE24_SCHPO Probable CAAX prenyl protease 1 OS=Schizosaccharomyces pombe (strain 972 / ATCC 24843) OX=284812 GN=SPAC3H1.05 PE=3 SV=1	54.001	19	33392	1	1284.3
Q9UU85	Protein kinase domain-containing protein ppk38	ppk38	22.387	1811	sp|Q9UU85|PPK38_SCHPO Protein kinase domain-containing protein ppk38 OS=Schizosaccharomyces pombe (strain 972 / ATCC 24843) OX=284812 GN=ppk38 PE=4 SV=1	71.999	10.6	44895	1	1282.7
P18296	Separin	cut1	2.2625	903	sp|P18296|CUT1_SCHPO Separin OS=Schizosaccharomyces pombe (strain 972 / ATCC 24843) OX=284812 GN=cut1 PE=1 SV=3	209.43	0.7	132080	1	1282.4
O36025	GYF domain-containing protein mpd2	mpd2	44.532	298	sp|O36025|MPD2_SCHPO GYF domain-containing protein mpd2 OS=Schizosaccharomyces pombe (strain 972 / ATCC 24843) OX=284812 GN=mpd2 PE=1 SV=1	106.14	5.2	58626	3	1274.5
Q9UTM7	Histone acetyltransferase type B catalytic subunit	hat1	1.5142	1790	sp|Q9UTM7|HAT1_SCHPO Histone acetyltransferase type B catalytic subunit OS=Schizosaccharomyces pombe (strain 972 / ATCC 24843) OX=284812 GN=hat1 PE=3 SV=2	44.051	4.8	19054	1	1270.3
Q9P7N4	tRNA-specific adenosine deaminase subunit tad3	tad3	9.7944	1603	sp|Q9P7N4|TAD3_SCHPO tRNA-specific adenosine deaminase subunit tad3 OS=Schizosaccharomyces pombe (strain 972 / ATCC 24843) OX=284812 GN=tad3 PE=3 SV=1	36.276	5.4	17768	1	1269.2
O60109	Alkaline phosphatase	SPBC14F5.13c	35.12	472	sp|O60109|PPB_SCHPO Alkaline phosphatase OS=Schizosaccharomyces pombe (strain 972 / ATCC 24843) OX=284812 GN=SPBC14F5.13c PE=3 SV=1	58.666	23.7	31220	2	1248.8
Q09769	Lon protease homolog, mitochondrial	pim1	18.152	1225	sp|Q09769|LONM_SCHPO Lon protease homolog, mitochondrial OS=Schizosaccharomyces pombe (strain 972 / ATCC 24843) OX=284812 GN=pim1 PE=3 SV=1	118.64	7.3	70898	3	1243.8
Q9P6J8	Uncharacterized deaminase C1683.02	SPBC1683.02	1.5532	1537	sp|Q9P6J8|YHD2_SCHPO Uncharacterized deaminase C1683.02 OS=Schizosaccharomyces pombe (strain 972 / ATCC 24843) OX=284812 GN=SPBC1683.02 PE=3 SV=1	39.436	4.4	21102	1	1241.3
Q10268	Membrane-anchored protein 1	mac1	16.238	1359	sp|Q10268|MAC1_SCHPO Membrane-anchored protein 1 OS=Schizosaccharomyces pombe (strain 972 / ATCC 24843) OX=284812 GN=mac1 PE=1 SV=1	81.715	10.4	39434	2	1232.3
Q09805	Vacuolar protein sorting-associated protein 45	vps45	1.7201	1241	sp|Q09805|VPS45_SCHPO Vacuolar protein sorting-associated protein 45 OS=Schizosaccharomyces pombe (strain 972 / ATCC 24843) OX=284812 GN=vps45 PE=3 SV=1	63.551	1.8	39263	1	1227
P78963	Protein arginine N-methyltransferase skb1	skb1	5.7461	1091	sp|P78963|SKB1_SCHPO Protein arginine N-methyltransferase skb1 OS=Schizosaccharomyces pombe (strain 972 / ATCC 24843) OX=284812 GN=skb1 PE=1 SV=2	73.166	5.7	43923	2	1220.1
O74978	Uncharacterized RNA-binding protein C1827.05c	SPCC1827.05c	24.142	686	sp|O74978|YQL5_SCHPO Uncharacterized RNA-binding protein C1827.05c OS=Schizosaccharomyces pombe (strain 972 / ATCC 24843) OX=284812 GN=SPCC1827.05c PE=4 SV=1	31.404	7.2	14498	1	1208.2
O36016	Serine/threonine-protein phosphatase 2A activator 1	rrd1	4.1306	295	sp|O36016|PTPA1_SCHPO Serine/threonine-protein phosphatase 2A activator 1 OS=Schizosaccharomyces pombe (strain 972 / ATCC 24843) OX=284812 GN=rrd1 PE=3 SV=1	37.169	5.8	26492	1	1204.2
O13783	Vacuolar protein-sorting protein bro1	bro1	15.722	97	sp|O13783|BRO1_SCHPO Vacuolar protein-sorting protein bro1 OS=Schizosaccharomyces pombe (strain 972 / ATCC 24843) OX=284812 GN=bro1 PE=3 SV=1	86.621	6.1	52844	2	1201
Q9USQ7	Diphthine--ammonia ligase	mug71	3.0671	1695	sp|Q9USQ7|DPH6_SCHPO Diphthine--ammonia ligase OS=Schizosaccharomyces pombe (strain 972 / ATCC 24843) OX=284812 GN=mug71 PE=1 SV=1	67.624	3.6	33428	1	1193.9
O94321	Multistep phosphorelay regulator 1	mpr1	10.457	726	sp|O94321|MPR1_SCHPO Multistep phosphorelay regulator 1 OS=Schizosaccharomyces pombe (strain 972 / ATCC 24843) OX=284812 GN=mpr1 PE=1 SV=1	32.55	9.5	15509	1	1193
Q10342	Protein sda1	sda1	24.019	1385	sp|Q10342|SDA1_SCHPO Protein sda1 OS=Schizosaccharomyces pombe (strain 972 / ATCC 24843) OX=284812 GN=sda1 PE=3 SV=2	81.25	7.6	33081	1	1181.5
Q9P7H4	Serine/threonine-protein phosphatase 2A activator 2	rrd2	1.8881	1588	sp|Q9P7H4|PTPA2_SCHPO Serine/threonine-protein phosphatase 2A activator 2 OS=Schizosaccharomyces pombe (strain 972 / ATCC 24843) OX=284812 GN=rrd2 PE=3 SV=1	40.288	4	17682	1	1178.8
Q10224	tRNA (carboxymethyluridine(34)-5-O)-methyltransferase	trm9	5.7504	1345	sp|Q10224|TRM9_SCHPO tRNA (carboxymethyluridine(34)-5-O)-methyltransferase OS=Schizosaccharomyces pombe (strain 972 / ATCC 24843) OX=284812 GN=trm9 PE=3 SV=1	26.277	10.5	16405	1	1171.8
P32747	Dihydroorotate dehydrogenase (quinone), mitochondrial	ura3	48.968	940	sp|P32747|PYRD_SCHPO Dihydroorotate dehydrogenase (quinone), mitochondrial OS=Schizosaccharomyces pombe (strain 972 / ATCC 24843) OX=284812 GN=ura3 PE=1 SV=1	48.295	43.8	31118	1	1152.5
O74946	DNA polymerase alpha subunit B	pol12	2.9014	673	sp|O74946|DPOA2_SCHPO DNA polymerase alpha subunit B OS=Schizosaccharomyces pombe (strain 972 / ATCC 24843) OX=284812 GN=pol12 PE=1 SV=1	64.184	7.3	36874	1	1152.3
O14048	UBX domain-containing protein 2	ubx2	2.5518	185	sp|O14048|UBX2_SCHPO UBX domain-containing protein 2 OS=Schizosaccharomyces pombe (strain 972 / ATCC 24843) OX=284812 GN=ubx2 PE=1 SV=1	47.234	4	19509	1	1147.6
P41820	Brefeldin A resistance protein	bfr1	125.45	1008	sp|P41820|BFR1_SCHPO Brefeldin A resistance protein OS=Schizosaccharomyces pombe (strain 972 / ATCC 24843) OX=284812 GN=bfr1 PE=1 SV=1	171.75	17.5	78846	2	1142.7
Q9USK7	Uncharacterized protein C4B3.18	SPCC4B3.18	2.7533	1682	sp|Q9USK7|YJ2I_SCHPO Uncharacterized protein C4B3.18 OS=Schizosaccharomyces pombe (strain 972 / ATCC 24843) OX=284812 GN=SPCC4B3.18 PE=3 SV=1	36.242	4.4	19245	1	1132.1
O13736	Actin cytoskeleton-regulatory complex protein sla1	sla1	42.357	82	sp|O13736|SLA1_SCHPO Actin cytoskeleton-regulatory complex protein sla1 OS=Schizosaccharomyces pombe (strain 972 / ATCC 24843) OX=284812 GN=sla1 PE=1 SV=1	154.63	3.3	51863	2	1127.4
Q9USY7	Transmembrane GTPase fzo1	fzo1	2.8306	1716	sp|Q9USY7|FZO1_SCHPO Transmembrane GTPase fzo1 OS=Schizosaccharomyces pombe (strain 972 / ATCC 24843) OX=284812 GN=fzo1 PE=3 SV=1	87.101	3.6	46174	2	1126.2
O74798	Putative arrestin-related trafficking adapter C2D10.04	SPBC2D10.04	8.3379	621	sp|O74798|ALY2_SCHPO Putative arrestin-related trafficking adapter C2D10.04 OS=Schizosaccharomyces pombe (strain 972 / ATCC 24843) OX=284812 GN=SPBC2D10.04 PE=1 SV=1	72.731	5.3	32632	1	1125.3
P23880	Serine/threonine-protein phosphatase PP1-2	sds21	5.6764	918	sp|P23880|PP12_SCHPO Serine/threonine-protein phosphatase PP1-2 OS=Schizosaccharomyces pombe (strain 972 / ATCC 24843) OX=284812 GN=sds21 PE=3 SV=1	36.829	6.5	21289	1	1120.5
O74463	Uncharacterized protein C1739.01		11.315	554	sp|O74463|YQC1_SCHPO Uncharacterized protein C1739.01 OS=Schizosaccharomyces pombe (strain 972 / ATCC 24843) OX=284812 GN=SPCC1739.01 PE=1 SV=2	57.978	6.8	31275	1	1117
P78790	Probable electron transfer flavoprotein subunit alpha, mitochondrial	SPAC27D7.06	27.91	1062	sp|P78790|ETFA_SCHPO Probable electron transfer flavoprotein subunit alpha, mitochondrial OS=Schizosaccharomyces pombe (strain 972 / ATCC 24843) OX=284812 GN=SPAC27D7.06 PE=2 SV=3	36.393	27.6	18549	1	1091.1
O42923	RNA-binding post-transcriptional regulator cip1	cip1	6.8162	342	sp|O42923|CIP1_SCHPO RNA-binding post-transcriptional regulator cip1 OS=Schizosaccharomyces pombe (strain 972 / ATCC 24843) OX=284812 GN=cip1 PE=1 SV=1	53.477	7.1	36994	1	1088.1
Q9UUJ6	Nuclear elongation and deformation protein 1	ned1	3.3538	1847	sp|Q9UUJ6|NED1_SCHPO Nuclear elongation and deformation protein 1 OS=Schizosaccharomyces pombe (strain 972 / ATCC 24843) OX=284812 GN=ned1 PE=1 SV=1	73.351	5.3	43319	2	1083
Q09913	Probable allantoicase	SPAC1F7.09c	8.6233	1279	sp|Q09913|ALLC_SCHPO Probable allantoicase OS=Schizosaccharomyces pombe (strain 972 / ATCC 24843) OX=284812 GN=SPAC1F7.09c PE=3 SV=1	37.965	4.1	20486	1	1078.2
Q9UUH4	Methylsterol monooxygenase	erg25	12.019	1840	sp|Q9UUH4|MSMO_SCHPO Methylsterol monooxygenase OS=Schizosaccharomyces pombe (strain 972 / ATCC 24843) OX=284812 GN=erg25 PE=3 SV=1	35.802	15	12922	1	1076.9
Q9P7M9	Probable GTP cyclohydrolase-2	rib1	6.5979	1602	sp|Q9P7M9|RIB1_SCHPO Probable GTP cyclohydrolase-2 OS=Schizosaccharomyces pombe (strain 972 / ATCC 24843) OX=284812 GN=rib1 PE=3 SV=1	36.524	18.1	21514	1	1075.7
O74478	Probable phosphoribomutase	SPCC1840.05c	12.232	560	sp|O74478|PGM3_SCHPO Probable phosphoribomutase OS=Schizosaccharomyces pombe (strain 972 / ATCC 24843) OX=284812 GN=SPCC1840.05c PE=1 SV=1	65.494	8.3	34038	2	1063.7
Q9UT61	Alpha-mannosidase	ams1	11.152	1746	sp|Q9UT61|MAN1_SCHPO Alpha-mannosidase OS=Schizosaccharomyces pombe (strain 972 / ATCC 24843) OX=284812 GN=ams1 PE=1 SV=1	122.44	8.1	59404	3	1060.8
O94667	RNA polymerase-associated protein C651.09c	SPBC651.09c	3.0494	831	sp|O94667|RTF1_SCHPO RNA polymerase-associated protein C651.09c OS=Schizosaccharomyces pombe (strain 972 / ATCC 24843) OX=284812 GN=SPBC651.09c PE=1 SV=1	63.679	3.4	24393	1	1060.6
O14328	Serine/threonine-protein kinase ksp1	ksp1	10.398	270	sp|O14328|KSP1_SCHPO Serine/threonine-protein kinase ksp1 OS=Schizosaccharomyces pombe (strain 972 / ATCC 24843) OX=284812 GN=ksp1 PE=1 SV=1	53.522	6.5	23318	2	1059.9
O74500	Nucleoporin nup60	nup60	6.8694	567	sp|O74500|NUP60_SCHPO Nucleoporin nup60 OS=Schizosaccharomyces pombe (strain 972 / ATCC 24843) OX=284812 GN=nup60 PE=1 SV=1	80.252	4.1	47566	1	1057
Q9US47	Putative succinate-semialdehyde dehydrogenase C1002.12c [NADP(+)]	SPAC1002.12c	6.755	1668	sp|Q9US47|SSDH1_SCHPO Putative succinate-semialdehyde dehydrogenase C1002.12c [NADP(+)] OS=Schizosaccharomyces pombe (strain 972 / ATCC 24843) OX=284812 GN=SPAC1002.12c PE=3 SV=2	58.833	8.6	32457	1	1047
P87123	DNA-directed RNA polymerase II subunit RPB11	rpb11	3.631	1118	sp|P87123|RPB11_SCHPO DNA-directed RNA polymerase II subunit RPB11 OS=Schizosaccharomyces pombe (strain 972 / ATCC 24843) OX=284812 GN=rpb11 PE=1 SV=1	14.127	45.5	10443	1	1044.3
O14003	Replication factor C subunit 3	rfc3	8.7579	168	sp|O14003|RFC3_SCHPO Replication factor C subunit 3 OS=Schizosaccharomyces pombe (strain 972 / ATCC 24843) OX=284812 GN=rfc3 PE=1 SV=2	38.439	3.8	19834	1	1043.9
Q10341	Probable serine-O-acetyltransferase cys2	cys2	19.445	1384	sp|Q10341|SST_SCHPO Serine O-succinyltransferase OS=Schizosaccharomyces pombe (strain 972 / ATCC 24843) OX=284812 GN=cys2 PE=1 SV=1	56.362	10.9	25583	1	1023.3
O42649	Structural maintenance of chromosomes protein 3	psm3	2.7662	303	sp|O42649|SMC3_SCHPO Structural maintenance of chromosomes protein 3 OS=Schizosaccharomyces pombe (strain 972 / ATCC 24843) OX=284812 GN=psm3 PE=1 SV=1	136.85	2.3	68340	1	1020
O94669	AP-3 complex subunit mu	apm3	3.3233	832	sp|O94669|AP3M_SCHPO AP-3 complex subunit mu OS=Schizosaccharomyces pombe (strain 972 / ATCC 24843) OX=284812 GN=apm3 PE=3 SV=1	48.422	6.8	24346	1	1014.4
Q11119	Ubiquitin carboxyl-terminal hydrolase 14	ubp14	2.7385	1420	sp|Q11119|UBP14_SCHPO Ubiquitin carboxyl-terminal hydrolase 14 OS=Schizosaccharomyces pombe (strain 972 / ATCC 24843) OX=284812 GN=ubp14 PE=1 SV=2	86.782	1.3	36438	1	1012.2
O42916	Lysophospholipid acyltransferase	ale1	1.4666	340	sp|O42916|ALE1_SCHPO Lysophospholipid acyltransferase OS=Schizosaccharomyces pombe (strain 972 / ATCC 24843) OX=284812 GN=ale1 PE=1 SV=1	58.821	8.6	23873	1	994.71
Q9USS2	Serine/threonine-protein kinase ppk29	ppk29	5.6445	1701	sp|Q9USS2|PPK29_SCHPO Serine/threonine-protein kinase ppk29 OS=Schizosaccharomyces pombe (strain 972 / ATCC 24843) OX=284812 GN=ppk29 PE=1 SV=1	96.125	1.7	37438	1	985.21
Q09831	Serine/threonine-protein kinase ppk14	ppk14	3.0278	1247	sp|Q09831|PPK14_SCHPO Serine/threonine-protein kinase ppk14 OS=Schizosaccharomyces pombe (strain 972 / ATCC 24843) OX=284812 GN=ppk14 PE=1 SV=1	63.482	4.2	23459	1	977.45
Q09843	Replication factor C subunit 2	rfc2	5.6799	1251	sp|Q09843|RFC2_SCHPO Replication factor C subunit 2 OS=Schizosaccharomyces pombe (strain 972 / ATCC 24843) OX=284812 GN=rfc2 PE=1 SV=1	37.876	9.1	18447	1	970.91
O94685	UBA domain-containing protein 8	ucp8	2.3743	837	sp|O94685|UCP8_SCHPO UBA domain-containing protein 8 OS=Schizosaccharomyces pombe (strain 972 / ATCC 24843) OX=284812 GN=ucp8 PE=1 SV=2	91.118	2.1	31054	1	970.44
Q9P7G5	Protein transport protein bos1	bos1	9.0866	1584	sp|Q9P7G5|BOS1_SCHPO Protein transport protein bos1 OS=Schizosaccharomyces pombe (strain 972 / ATCC 24843) OX=284812 GN=bos1 PE=3 SV=1	26.854	11.5	12473	1	959.42
P78968	Serine/threonine-protein phosphatase PP-Z	pzh1	4.4332	1093	sp|P78968|PPZ_SCHPO Serine/threonine-protein phosphatase PP-Z OS=Schizosaccharomyces pombe (strain 972 / ATCC 24843) OX=284812 GN=pzh1 PE=1 SV=1	57.131	5.4	21055	1	957.05
O13897	Uncharacterized hydrolase C22A12.06c	SPAC22A12.06c	4.2563	137	sp|O13897|YF36_SCHPO Uncharacterized hydrolase C22A12.06c OS=Schizosaccharomyces pombe (strain 972 / ATCC 24843) OX=284812 GN=SPAC22A12.06c PE=3 SV=1	48.231	7.7	21838	1	949.5
O42958	DNA topoisomerase 2-associated protein pat1	SPBC19G7.10c	5.9026	356	sp|O42958|PAT1_SCHPO DNA topoisomerase 2-associated protein pat1 OS=Schizosaccharomyces pombe (strain 972 / ATCC 24843) OX=284812 GN=SPBC19G7.10c PE=3 SV=2	84.116	2.1	32167	1	946.08
O43058	Forkhead protein sep1	2022-09-01	6.0365	386	sp|O43058|SEP1_SCHPO Forkhead protein sep1 OS=Schizosaccharomyces pombe (strain 972 / ATCC 24843) OX=284812 GN=sep1 PE=1 SV=1	73.031	3.5	30255	1	945.48
P53694	Reticulon-like protein 1	rtn1	24.682	1042	sp|P53694|RTN1_SCHPO Reticulon-like protein 1 OS=Schizosaccharomyces pombe (strain 972 / ATCC 24843) OX=284812 GN=rtn1 PE=1 SV=1	33.659	25.6	12198	2	938.27
Q09910	Uncharacterized protein C30D11.11	SPAC30D11.11	10.912	1276	sp|Q09910|YAJB_SCHPO Uncharacterized protein C30D11.11 OS=Schizosaccharomyces pombe (strain 972 / ATCC 24843) OX=284812 GN=SPAC30D11.11 PE=4 SV=1	51.056	14.7	19632	1	934.85
O14362	Cell wall biosynthesis/cell cycle regulator smi1	smi1	15.63	282	sp|O14362|SMI1_SCHPO Cell wall biosynthesis/cell cycle regulator smi1 OS=Schizosaccharomyces pombe (strain 972 / ATCC 24843) OX=284812 GN=smi1 PE=1 SV=1	55.557	4.4	13770	1	918.01
Q9P6R2	Uncharacterized protein C13E7.08c	SPBC13E7.08c	18.944	1553	sp|Q9P6R2|YOH8_SCHPO Uncharacterized protein C13E7.08c OS=Schizosaccharomyces pombe (strain 972 / ATCC 24843) OX=284812 GN=SPBC13E7.08c PE=3 SV=1	48.733	14.5	11924	1	917.22
Q04665	Guanine nucleotide-binding protein alpha-2 subunit	gpa2	4.3114	1161	sp|Q04665|GPA2_SCHPO Guanine nucleotide-binding protein alpha-2 subunit OS=Schizosaccharomyces pombe (strain 972 / ATCC 24843) OX=284812 GN=gpa2 PE=1 SV=1	40.522	5.4	17276	1	909.24
Q10155	Ribonuclease Z 1	trz1	1.5592	1317	sp|Q10155|RNZ1_SCHPO Ribonuclease Z 1 OS=Schizosaccharomyces pombe (strain 972 / ATCC 24843) OX=284812 GN=trz1 PE=3 SV=1	90.602	1	29574	1	896.18
O94432	Uncharacterized RNA-binding protein C660.15	SPBC660.15	2.2977	762	sp|O94432|YHKF_SCHPO Uncharacterized RNA-binding protein C660.15 OS=Schizosaccharomyces pombe (strain 972 / ATCC 24843) OX=284812 GN=SPBC660.15 PE=4 SV=1	52.818	1.9	17855	1	892.74
O14340	Oxysterol-binding protein homolog C2F12.05c	SPBC2F12.05c	13.176	274	sp|O14340|YB35_SCHPO Oxysterol-binding protein homolog C2F12.05c OS=Schizosaccharomyces pombe (strain 972 / ATCC 24843) OX=284812 GN=SPBC2F12.05c PE=1 SV=2	148.47	5.4	71339	4	891.74
Q9HDW6	V-type proton ATPase subunit C	vma5	27.127	1486	sp|Q9HDW6|VATC_SCHPO V-type proton ATPase subunit C OS=Schizosaccharomyces pombe (strain 972 / ATCC 24843) OX=284812 GN=vma5 PE=1 SV=1	44.361	10.2	19417	1	882.59
O74378	2-oxoglutarate dehydrogenase, mitochondrial	kgd1	58.534	523	sp|O74378|ODO1_SCHPO 2-oxoglutarate dehydrogenase, mitochondrial OS=Schizosaccharomyces pombe (strain 972 / ATCC 24843) OX=284812 GN=kgd1 PE=3 SV=1	114.16	19.4	41352	2	861.49
O43032	Signal recognition particle receptor subunit alpha homolog	srp101	16.989	376	sp|O43032|SRPR_SCHPO Signal recognition particle receptor subunit alpha homolog OS=Schizosaccharomyces pombe (strain 972 / ATCC 24843) OX=284812 GN=srp101 PE=3 SV=1	61.077	11	28268	1	856.59
Q09100	RNA-binding protein rnp24	rnp24	5.8919	1163	sp|Q09100|RNP24_SCHPO RNA-binding protein rnp24 OS=Schizosaccharomyces pombe (strain 972 / ATCC 24843) OX=284812 GN=rnp24 PE=4 SV=2	42.073	6.2	20515	1	854.79
P79010	Cytochrome c oxidase subunit 4, mitochondrial	cox4	71.083	1095	sp|P79010|COX4_SCHPO Cytochrome c oxidase subunit 4, mitochondrial OS=Schizosaccharomyces pombe (strain 972 / ATCC 24843) OX=284812 GN=cox4 PE=2 SV=1	18.161	37.2	10217	1	851.46
O14065	Uncharacterized protein C962.01		64.784	192	sp|O14065|YC31_SCHPO Uncharacterized protein C962.01 OS=Schizosaccharomyces pombe (strain 972 / ATCC 24843) OX=284812 GN=SPCC962.01 PE=2 SV=3	156.03	4.6	60372	3	838.5
Q9P7Y8	Septin ring organizing protein mid2	mid2	4.12	1629	sp|Q9P7Y8|MID2_SCHPO Septin ring organizing protein mid2 OS=Schizosaccharomyces pombe (strain 972 / ATCC 24843) OX=284812 GN=mid2 PE=1 SV=2	78.96	1.8	25798	1	832.18
Q92359	Pumilio domain-containing protein C6G9.14	SPAC6G9.14	2.6588	1450	sp|Q92359|YDHE_SCHPO Pumilio domain-containing protein C6G9.14 OS=Schizosaccharomyces pombe (strain 972 / ATCC 24843) OX=284812 GN=SPAC6G9.14 PE=4 SV=1	73.291	2.6	19058	1	828.62
Q09766	Uncharacterized membrane protein C24H6.13	SPAC24H6.13	8.6602	1223	sp|Q09766|YA7D_SCHPO Uncharacterized membrane protein C24H6.13 OS=Schizosaccharomyces pombe (strain 972 / ATCC 24843) OX=284812 GN=SPAC24H6.13 PE=1 SV=1	98.441	5.2	26360	1	823.74
O94347	ATP-dependent (S)-NAD(P)H-hydrate dehydratase	SPCC61.03	1.4956	735	sp|O94347|NNRD_SCHPO ATP-dependent (S)-NAD(P)H-hydrate dehydratase OS=Schizosaccharomyces pombe (strain 972 / ATCC 24843) OX=284812 GN=SPCC61.03 PE=3 SV=1	36.093	3.4	14789	1	821.59
Q01682	Thiamine-repressible acid phosphatase pho4	pho4	25.855	1155	sp|Q01682|PPA2_SCHPO Thiamine-repressible acid phosphatase pho4 OS=Schizosaccharomyces pombe (strain 972 / ATCC 24843) OX=284812 GN=pho4 PE=1 SV=1	52.118	18.8	13945	1	820.3
Q10357	Superoxide dismutase 1 copper chaperone	ccs1	19.471	1391	sp|Q10357|CCS1_SCHPO Superoxide dismutase 1 copper chaperone OS=Schizosaccharomyces pombe (strain 972 / ATCC 24843) OX=284812 GN=ccs1 PE=3 SV=1	32.243	14.1	19674	1	819.75
O14072	Manganese-transporting ATPase 4	cta4	57.891	194	sp|O14072|ATC4_SCHPO Endoplasmic reticulum transmembrane helix translocase OS=Schizosaccharomyces pombe (strain 972 / ATCC 24843) OX=284812 GN=cta4 PE=1 SV=1	136.26	11.9	52905	3	813.93
Q09697	Rho-GTPase-activating protein 8	rga8	15.921	1197	sp|Q09697|RGA8_SCHPO Rho-GTPase-activating protein 8 OS=Schizosaccharomyces pombe (strain 972 / ATCC 24843) OX=284812 GN=rga8 PE=1 SV=1	88.207	5.5	35263	2	801.44
Q9HDY1	Anaphase spindle elongation protein 1	ase1	3.8881	1489	sp|Q9HDY1|ASE1_SCHPO Anaphase spindle elongation protein 1 OS=Schizosaccharomyces pombe (strain 972 / ATCC 24843) OX=284812 GN=ase1 PE=1 SV=1	83.172	3.1	28810	1	800.29
P22987	Protein kinase kin1	kin1	4.592	914	sp|P22987|KIN1_SCHPO Protein kinase kin1 OS=Schizosaccharomyces pombe (strain 972 / ATCC 24843) OX=284812 GN=kin1 PE=1 SV=3	98.748	1.6	35534	1	789.65
O14325	Uncharacterized AAA domain-containing protein C16E9.10c	SPBC16E9.10c	10.132	268	sp|O14325|YB7A_SCHPO Uncharacterized AAA domain-containing protein C16E9.10c OS=Schizosaccharomyces pombe (strain 972 / ATCC 24843) OX=284812 GN=SPBC16E9.10c PE=1 SV=1	86.178	4	33926	2	788.97
O74879	Ribosome biogenesis protein enp2 homolog	enp2	10.344	650	sp|O74879|NOL10_SCHPO Ribosome biogenesis protein enp2 homolog OS=Schizosaccharomyces pombe (strain 972 / ATCC 24843) OX=284812 GN=enp2 PE=1 SV=1	72.238	8	25205	1	787.66
Q9UTH2	Probable electron transfer flavoprotein subunit beta	SPAC1805.02c	12.782	1773	sp|Q9UTH2|ETFB_SCHPO Probable electron transfer flavoprotein subunit beta OS=Schizosaccharomyces pombe (strain 972 / ATCC 24843) OX=284812 GN=SPAC1805.02c PE=3 SV=1	27.743	18.5	9445.5	1	787.12
O13837	4-aminobutyrate aminotransferase	uga1	1.9782	118	sp|O13837|GABAT_SCHPO 4-aminobutyrate aminotransferase OS=Schizosaccharomyces pombe (strain 972 / ATCC 24843) OX=284812 GN=uga1 PE=1 SV=1	52.945	9.3	17905	1	778.49
P27574	Tyrosine-protein phosphatase 1	pyp1	14.065	922	sp|P27574|PYP1_SCHPO Tyrosine-protein phosphatase 1 OS=Schizosaccharomyces pombe (strain 972 / ATCC 24843) OX=284812 GN=pyp1 PE=1 SV=1	61.587	6.4	24776	1	774.24
O14459	DNA-directed RNA polymerase II subunit rpb7	rpb7	5.6454	289	sp|O14459|RPB7_SCHPO DNA-directed RNA polymerase II subunit rpb7 OS=Schizosaccharomyces pombe (strain 972 / ATCC 24843) OX=284812 GN=rpb7 PE=1 SV=1	19.103	11.6	6152	1	769.01
Q9HDZ2	Protein cwh43	cwh43	3.4976	1492	sp|Q9HDZ2|CWH43_SCHPO Protein cwh43 OS=Schizosaccharomyces pombe (strain 972 / ATCC 24843) OX=284812 GN=cwh43 PE=2 SV=2	110.03	2.7	23022	1	767.39
O14232	ATP-dependent RNA helicase mtr4	mtr4	12.978	240	sp|O14232|MTR4_SCHPO ATP-dependent RNA helicase mtr4 OS=Schizosaccharomyces pombe (strain 972 / ATCC 24843) OX=284812 GN=mtr4 PE=1 SV=1	126.19	7.5	47294	2	762.81
O13898	Dolichyl-phosphate-mannose--protein mannosyltransferase 1	ogm1	26.979	138	sp|O13898|PMT1_SCHPO Dolichyl-phosphate-mannose--protein mannosyltransferase 1 OS=Schizosaccharomyces pombe (strain 972 / ATCC 24843) OX=284812 GN=ogm1 PE=1 SV=1	101.33	10.4	27287	1	757.97
Q9C1X2	Putative D-lactate dehydrogenase C713.03, mitochondrial	SPBC713.03	9.1755	1482	sp|Q9C1X2|YN53_SCHPO Putative D-lactate dehydrogenase C713.03, mitochondrial OS=Schizosaccharomyces pombe (strain 972 / ATCC 24843) OX=284812 GN=SPBC713.03 PE=3 SV=1	58.472	19.6	19636	1	755.24
Q9USN2	UPF0652 protein C16A11.03c	SPCC16A11.03c	1.9432	1688	sp|Q9USN2|YCL3_SCHPO UPF0652 protein C16A11.03c OS=Schizosaccharomyces pombe (strain 972 / ATCC 24843) OX=284812 GN=SPCC16A11.03c PE=3 SV=1	53.677	1.7	19373	1	745.1
O74521	Uncharacterized protein C663.15c	SPCC663.15c	21.061	575	sp|O74521|YCPF_SCHPO Uncharacterized protein C663.15c OS=Schizosaccharomyces pombe (strain 972 / ATCC 24843) OX=284812 GN=SPCC663.15c PE=4 SV=2	77.086	17	27337	2	738.85
Q9UTH9	tRNA-dihydrouridine(47) synthase [NAD(P)(+)]	dus3	49.866	1775	sp|Q9UTH9|DUS3_SCHPO tRNA-dihydrouridine(47) synthase [NAD(P)(+)] OS=Schizosaccharomyces pombe (strain 972 / ATCC 24843) OX=284812 GN=dus3 PE=3 SV=1	69.698	29	24351	1	737.92
O42869	Uncharacterized protein C3G9.05	SPAC3G9.05	27.903	322	sp|O42869|YF75_SCHPO Uncharacterized protein C3G9.05 OS=Schizosaccharomyces pombe (strain 972 / ATCC 24843) OX=284812 GN=SPAC3G9.05 PE=1 SV=1	73.872	7.4	28615	2	733.71
O14236	Nucleolar GTP-binding protein 2	nog2	31.155	241	sp|O14236|NOG2_SCHPO Nucleolar GTP-binding protein 2 OS=Schizosaccharomyces pombe (strain 972 / ATCC 24843) OX=284812 GN=nog2 PE=1 SV=1	59.913	16.2	21280	1	709.34
Q9UT85	Uncharacterized WD repeat-containing protein C343.04c	SPAC343.04c	12.577	1749	sp|Q9UT85|YIPC_SCHPO Uncharacterized WD repeat-containing protein C343.04c OS=Schizosaccharomyces pombe (strain 972 / ATCC 24843) OX=284812 GN=SPAC343.04c PE=4 SV=1	58.403	2.8	19811	1	707.52
Q10245	Very-long-chain 3-oxoacyl-CoA reductase	SPAC4G9.15	15.814	1354	sp|Q10245|MKAR_SCHPO Very-long-chain 3-oxoacyl-CoA reductase OS=Schizosaccharomyces pombe (strain 972 / ATCC 24843) OX=284812 GN=SPAC4G9.15 PE=3 SV=1	37.307	22.9	13130	1	691.08
O43005	AP-2 complex subunit beta	apl1	4.1948	364	sp|O43005|AP2B_SCHPO AP-2 complex subunit beta OS=Schizosaccharomyces pombe (strain 972 / ATCC 24843) OX=284812 GN=apl1 PE=3 SV=1	76.534	3.7	21297	1	686.99
Q09731	UBP9-binding protein bun107	bun107	28.141	1208	sp|Q09731|BU107_SCHPO UBP9-binding protein bun107 OS=Schizosaccharomyces pombe (strain 972 / ATCC 24843) OX=284812 GN=bun107 PE=1 SV=1	107.28	8.3	34332	1	673.18
Q09695	Uncharacterized protein C2F7.02c	SPAC2F7.02c	7.0998	1196	sp|Q09695|YA22_SCHPO Uncharacterized protein C2F7.02c OS=Schizosaccharomyces pombe (strain 972 / ATCC 24843) OX=284812 GN=SPAC2F7.02c PE=1 SV=1	36.691	8.9	10654	1	665.86
O74184	WD repeat-containing protein wat1	wat1	2.5881	504	sp|O74184|WAT1_SCHPO Target of rapamycin complex subunit wat1 OS=Schizosaccharomyces pombe (strain 972 / ATCC 24843) OX=284812 GN=pop3 PE=1 SV=1	35.132	3.5	9916.7	1	661.11
Q9UTB0	Dilute domain-containing protein C25B8.08	SPAC25B8.08	1.486	1757	sp|Q9UTB0|YL88_SCHPO Dilute domain-containing protein C25B8.08 OS=Schizosaccharomyces pombe (strain 972 / ATCC 24843) OX=284812 GN=SPAC25B8.08 PE=4 SV=1	68.051	2.5	23455	1	651.54
O94365	U3 small nucleolar RNA-associated protein 15	utp15	4.0387	741	sp|O94365|UTP15_SCHPO U3 small nucleolar RNA-associated protein 15 OS=Schizosaccharomyces pombe (strain 972 / ATCC 24843) OX=284812 GN=utp15 PE=3 SV=1	54.111	3.8	13024	1	651.19
P41838	Poly(A)+ RNA export protein	rae1	2.707	1011	sp|P41838|RAE1_SCHPO Poly(A)+ RNA export protein OS=Schizosaccharomyces pombe (strain 972 / ATCC 24843) OX=284812 GN=rae1 PE=1 SV=1	38.626	9.7	11579	1	643.27
Q9UTN2	Uncharacterized protein C139.01c		4.0063	1792	sp|Q9UTN2|MKT1_SCHPO Post-transcriptional regulator mkt1 OS=Schizosaccharomyces pombe (strain 972 / ATCC 24843) OX=284812 GN=mkt1 PE=1 SV=2	90.152	1.9	25689	1	642.23
O74427	Uridine kinase	urk1	3.5958	542	sp|O74427|URK1_SCHPO Uridine kinase OS=Schizosaccharomyces pombe (strain 972 / ATCC 24843) OX=284812 GN=urk1 PE=3 SV=1	51.389	2.9	17246	1	638.74
P40383	5-3 exoribonuclease 1	exo2	5.8654	992	sp|P40383|XRN1_SCHPO 5-3 exoribonuclease 1 OS=Schizosaccharomyces pombe (strain 972 / ATCC 24843) OX=284812 GN=exo2 PE=1 SV=1	152.59	3.3	44043	2	638.3
O60129	Fork head protein homolog 2	fkh2	4.7985	480	sp|O60129|FKH2_SCHPO Fork head protein homolog 2 OS=Schizosaccharomyces pombe (strain 972 / ATCC 24843) OX=284812 GN=fkh2 PE=1 SV=1	71.173	5.1	22039	1	629.67
Q9UUH7	GTPase-activating protein gyp7	gyp7	2.7687	1841	sp|Q9UUH7|GYP7_SCHPO GTPase-activating protein gyp7 OS=Schizosaccharomyces pombe (strain 972 / ATCC 24843) OX=284812 GN=gyp7 PE=3 SV=1	86.792	3.1	24239	1	621.52
Q9URY8	Probable sulfate permease C869.05c	SPAC869.05c	2.8018	1651	sp|Q9URY8|SULH2_SCHPO Probable sulfate permease C869.05c OS=Schizosaccharomyces pombe (strain 972 / ATCC 24843) OX=284812 GN=SPAC869.05c PE=1 SV=1	93.517	2.3	22234	1	617.61
Q9HGQ2	Multisite-specific tRNA:(cytosine-C(5))-methyltransferase trm4a	trm4a	8.7546	1513	sp|Q9HGQ2|TRM4A_SCHPO Multisite-specific tRNA:(cytosine-C(5))-methyltransferase trm4a OS=Schizosaccharomyces pombe (strain 972 / ATCC 24843) OX=284812 GN=trm4a PE=1 SV=3	78.514	6.8	24677	1	616.91
O74741	4,5-DOPA dioxygenase extradiol-like protein	SPBC1709.16c	1.7333	600	sp|O74741|DIOXL_SCHPO 4,5-DOPA dioxygenase extradiol-like protein OS=Schizosaccharomyces pombe (strain 972 / ATCC 24843) OX=284812 GN=SPBC1709.16c PE=3 SV=2	33.701	3.7	10452	1	614.83
O94725	Protein-glutamate O-methyltransferase C1393.13	SPCC1393.13	3.1206	845	sp|O94725|ART1B_SCHPO Damage-control phosphatase SPCC1393.13 OS=Schizosaccharomyces pombe (strain 972 / ATCC 24843) OX=284812 GN=SPCC1393.13 PE=3 SV=1	50.117	1.6	14752	1	614.66
O59787	Signal recognition particle subunit srp72	srp72	24.742	431	sp|O59787|SRP72_SCHPO Signal recognition particle subunit srp72 OS=Schizosaccharomyces pombe (strain 972 / ATCC 24843) OX=284812 GN=srp72 PE=3 SV=1	63.28	9.8	21057	1	601.63
Q9P783	Ribosome assembly protein rrb1	rrb1	4.2859	1564	sp|Q9P783|RRB1_SCHPO Ribosome assembly protein rrb1 OS=Schizosaccharomyces pombe (strain 972 / ATCC 24843) OX=284812 GN=rrb1 PE=1 SV=1	53.834	6.5	11398	2	599.87
Q9USS6	Probable acid phosphatase SPBC4.06	SPBC4.06	47.047	1702	sp|Q9USS6|PPA4_SCHPO Probable acid phosphatase SPBC4.06 OS=Schizosaccharomyces pombe (strain 972 / ATCC 24843) OX=284812 GN=SPBC4.06 PE=3 SV=1	51.975	32.7	16132	1	597.49
O94326	Zinc finger protein C725.08	SPBC725.08	19.86	728	sp|O94326|PIR2_SCHPO NURS complex subunit pir2 OS=Schizosaccharomyces pombe (strain 972 / ATCC 24843) OX=284812 GN=pir2 PE=1 SV=1	70.864	12.2	17789	1	592.98
O94247	DNA polymerase alpha-associated DNA helicase A	hcs1	3.0039	695	sp|O94247|HCS1_SCHPO DNA polymerase alpha-associated DNA helicase A OS=Schizosaccharomyces pombe (strain 972 / ATCC 24843) OX=284812 GN=hcs1 PE=3 SV=1	75.002	2.3	24283	1	592.27
Q09799	Protein kri1	kri1	14.975	1238	sp|Q09799|KRI1_SCHPO Protein kri1 OS=Schizosaccharomyces pombe (strain 972 / ATCC 24843) OX=284812 GN=kri1 PE=1 SV=1	69.523	4.7	15979	1	591.82
Q9UUE7	Cell division control protein 73	cdc73	2.6264	1831	sp|Q9UUE7|CDC73_SCHPO Cell division control protein 73 OS=Schizosaccharomyces pombe (strain 972 / ATCC 24843) OX=284812 GN=cdc73 PE=3 SV=1	42.629	4	12856	1	584.35
P78898	Probable lipase C16A3.12c	SPBC16A3.12c	2.8141	1082	sp|P78898|TGCE2_SCHPO Probable lipase C16A3.12c OS=Schizosaccharomyces pombe (strain 972 / ATCC 24843) OX=284812 GN=SPBC16A3.12c PE=3 SV=2	51.547	2.5	15079	1	579.95
O94282	Cytoplasmic tRNA 2-thiolation protein 1	ncs6	20.089	708	sp|O94282|CTU1_SCHPO Cytoplasmic tRNA 2-thiolation protein 1 OS=Schizosaccharomyces pombe (strain 972 / ATCC 24843) OX=284812 GN=ncs6 PE=1 SV=1	37.861	4.5	9840.3	1	578.84
P87111	Probable electron transfer flavoprotein-ubiquinone oxidoreductase, mitochondrial	SPAC20G8.04c	26.052	1112	sp|P87111|ETFD_SCHPO Probable electron transfer flavoprotein-ubiquinone oxidoreductase, mitochondrial OS=Schizosaccharomyces pombe (strain 972 / ATCC 24843) OX=284812 GN=SPAC20G8.04c PE=3 SV=1	69.472	21	18519	1	578.73
Q10435	Probable ubiquitin fusion degradation protein C12B10.01c		11.82	1401	sp|Q10435|YDE1_SCHPO Probable ubiquitin fusion degradation protein C12B10.01c OS=Schizosaccharomyces pombe (strain 972 / ATCC 24843) OX=284812 GN=SPAC12B10.01c PE=3 SV=2	185.61	2.4	36842	1	575.65
P41389	DNA replication licensing factor mcm5	mcm5	23.247	1005	sp|P41389|MCM5_SCHPO DNA replication licensing factor mcm5 OS=Schizosaccharomyces pombe (strain 972 / ATCC 24843) OX=284812 GN=mcm5 PE=1 SV=2	80.099	9.2	25125	1	558.34
Q9USP9	Uncharacterized RNA-binding protein C902.04	SPBC902.04	2.3176	1693	sp|Q9USP9|YHP4_SCHPO Uncharacterized RNA-binding protein C902.04 OS=Schizosaccharomyces pombe (strain 972 / ATCC 24843) OX=284812 GN=SPBC902.04 PE=1 SV=1	66.898	3.6	13371	1	557.13
O42908	Mitochondrial presequence protease	cym1	8.1294	336	sp|O42908|CYM1_SCHPO Mitochondrial presequence protease OS=Schizosaccharomyces pombe (strain 972 / ATCC 24843) OX=284812 GN=cym1 PE=3 SV=1	98.969	4.9	23195	1	552.27
Q9HE05	Ubiquitin conjugation factor E4	ufd2	6.5383	1495	sp|Q9HE05|UFD2_SCHPO Ubiquitin conjugation factor E4 OS=Schizosaccharomyces pombe (strain 972 / ATCC 24843) OX=284812 GN=ufd2 PE=2 SV=1	115.28	2.9	29235	1	551.61
Q9P3U4	E3 ubiquitin-protein ligase dbl4	dbl4	10.757	1522	sp|Q9P3U4|HEL1_SCHPO E3 ubiquitin-protein ligase dbl4 OS=Schizosaccharomyces pombe (strain 972 / ATCC 24843) OX=284812 GN=dbl4 PE=3 SV=1	58.938	2.4	12606	1	548.09
O59761	S-adenosyl-L-methionine-dependent tRNA 4-demethylwyosine synthase	tyw1	9.3934	423	sp|O59761|TYW1_SCHPO S-adenosyl-L-methionine-dependent tRNA 4-demethylwyosine synthase OS=Schizosaccharomyces pombe (strain 972 / ATCC 24843) OX=284812 GN=tyw1 PE=3 SV=1	78.187	2.5	18477	1	543.43
O13282	Transcription initiation factor TFIID subunit 5	taf5	9.5666	55	sp|O13282|TAF5_SCHPO Transcription initiation factor TFIID subunit 5 OS=Schizosaccharomyces pombe (strain 972 / ATCC 24843) OX=284812 GN=taf5 PE=1 SV=1	72.38	2.5	17357	1	542.41
P36594	DNA-directed RNA polymerase II subunit rpb1	rpb1	40.51	958	sp|P36594|RPB1_SCHPO DNA-directed RNA polymerase II subunit rpb1 OS=Schizosaccharomyces pombe (strain 972 / ATCC 24843) OX=284812 GN=rpb1 PE=1 SV=1	194.16	6.5	38654	1	536.87
O13935	Multisite-specific tRNA:(cytosine-C(5))-methyltransferase trm4b	trm4b	19.986	150	sp|O13935|TRM4B_SCHPO Multisite-specific tRNA:(cytosine-C(5))-methyltransferase trm4b OS=Schizosaccharomyces pombe (strain 972 / ATCC 24843) OX=284812 GN=trm4b PE=1 SV=2	77.821	9.9	21281	1	532.02
Q9UU99	CRAL-TRIO domain-containing protein C23B6.04c	SPCC23B6.04c	6.9505	1815	sp|Q9UU99|YJX4_SCHPO CRAL-TRIO domain-containing protein C23B6.04c OS=Schizosaccharomyces pombe (strain 972 / ATCC 24843) OX=284812 GN=SPCC23B6.04c PE=1 SV=1	110.72	5.7	34872	2	528.37
Q9C1W6	Uncharacterized protein C713.09	SPBC713.09	7.6536	1481	sp|Q9C1W6|YN59_SCHPO Uncharacterized protein C713.09 OS=Schizosaccharomyces pombe (strain 972 / ATCC 24843) OX=284812 GN=SPBC713.09 PE=4 SV=1	44.77	6.1	8908.6	1	524.04
Q8WZK5	Putative arrestin-related trafficking adapter C839.02	SPBC839.02	3.9415	1443	sp|Q8WZK5|ALY1_SCHPO Putative arrestin-related trafficking adapter SPBC839.02 OS=Schizosaccharomyces pombe (strain 972 / ATCC 24843) OX=284812 GN=SPBC839.02 PE=3 SV=2	57.93	7.1	14652	1	523.28
Q09916	ATP-dependent RNA helicase has1	has1	4.7323	1282	sp|Q09916|HAS1_SCHPO ATP-dependent RNA helicase has1 OS=Schizosaccharomyces pombe (strain 972 / ATCC 24843) OX=284812 GN=has1 PE=1 SV=1	65.261	2.4	17066	1	517.17
Q09849	SWI/SNF and RSC complexes subunit arp42	arp42	9.406	1254	sp|Q09849|ARP42_SCHPO SWI/SNF and RSC complexes subunit arp42 OS=Schizosaccharomyces pombe (strain 972 / ATCC 24843) OX=284812 GN=arp42 PE=1 SV=2	47.1	7.5	9128.3	1	507.13
O75001	DNA replication licensing factor mcm7	mcm7	24.077	690	sp|O75001|MCM7_SCHPO DNA replication licensing factor mcm7 OS=Schizosaccharomyces pombe (strain 972 / ATCC 24843) OX=284812 GN=mcm7 PE=1 SV=1	85.621	18.7	21898	1	497.69
O74842	ATP-dependent helicase fft2	fft2	9.0092	634	sp|O74842|FFT2_SCHPO ATP-dependent helicase fft2 OS=Schizosaccharomyces pombe (strain 972 / ATCC 24843) OX=284812 GN=fft2 PE=1 SV=1	143.67	6.2	28320	1	496.84
O13821	Vacuolar protein sorting-associated protein 27	sst4	9.676	114	sp|O13821|VPS27_SCHPO Vacuolar protein sorting-associated protein 27 OS=Schizosaccharomyces pombe (strain 972 / ATCC 24843) OX=284812 GN=sst4 PE=3 SV=1	68.242	1.8	17028	1	486.52
P87150	MICOS complex subunit mic19	mic19	6.1632	1128	sp|P87150|MIC19_SCHPO MICOS complex subunit mic19 OS=Schizosaccharomyces pombe (strain 972 / ATCC 24843) OX=284812 GN=mic19 PE=3 SV=1	18.767	7.4	4783.3	1	478.33
Q76PD3	ATP-dependent RNA helicase dbp6	dbp6	3.8352	1431	sp|Q76PD3|DBP6_SCHPO ATP-dependent RNA helicase dbp6 OS=Schizosaccharomyces pombe (strain 972 / ATCC 24843) OX=284812 GN=dbp6 PE=2 SV=1	68.344	2.8	14135	1	471.17
P15398	DNA-directed RNA polymerase I subunit rpa1	rpa1	8.6253	894	sp|P15398|RPA1_SCHPO DNA-directed RNA polymerase I subunit rpa1 OS=Schizosaccharomyces pombe (strain 972 / ATCC 24843) OX=284812 GN=rpa1 PE=1 SV=2	189.24	2.5	42854	1	470.92
O94277	Putative aminodeoxychorismate synthase	SPBP8B7.29	2.8666	704	sp|O94277|ADCS_SCHPO Putative aminodeoxychorismate synthase OS=Schizosaccharomyces pombe (strain 972 / ATCC 24843) OX=284812 GN=SPBP8B7.29 PE=3 SV=1	80.598	2.4	17703	1	465.86
O94559	Uncharacterized protein C23C4.05c	SPAC23C4.05c	9.687	797	sp|O94559|LES1_SCHPO Nuclear bridge Ish domain protein les1 OS=Schizosaccharomyces pombe (strain 972 / ATCC 24843) OX=284812 GN=les1 PE=3 SV=1	49.532	8.1	10619	1	461.69
Q09915	Transcription elongation factor spt6	spt6	63.325	1281	sp|Q09915|SPT6_SCHPO Transcription elongation factor spt6 OS=Schizosaccharomyces pombe (strain 972 / ATCC 24843) OX=284812 GN=spt6 PE=1 SV=2	157.21	13.5	30168	2	437.22
Q9UUG8	Transcriptional repressor tup12	tup12	15.61	1837	sp|Q9UUG8|TUP12_SCHPO Transcriptional repressor tup12 OS=Schizosaccharomyces pombe (strain 972 / ATCC 24843) OX=284812 GN=tup12 PE=1 SV=2	65.56	2	14720	1	432.94
Q9USR3	Phosphatidylinositol 4-kinase stt4	stt4	7.5108	1698	sp|Q9USR3|STT4_SCHPO Phosphatidylinositol 4-kinase stt4 OS=Schizosaccharomyces pombe (strain 972 / ATCC 24843) OX=284812 GN=stt4 PE=3 SV=1	213.96	3.3	43069	2	430.69
P36582	Protein kinase C-like 1	pck1	8.9845	951	sp|P36582|PCK1_SCHPO Protein kinase C-like 1 OS=Schizosaccharomyces pombe (strain 972 / ATCC 24843) OX=284812 GN=pck1 PE=3 SV=2	111.78	3.6	21237	1	416.42
P30316	DNA polymerase delta catalytic subunit	pol3	28.113	929	sp|P30316|DPOD_SCHPO DNA polymerase delta catalytic subunit OS=Schizosaccharomyces pombe (strain 972 / ATCC 24843) OX=284812 GN=pol3 PE=1 SV=2	123.57	9.6	25374	1	415.97
P87240	General negative regulator of transcription subunit 2	not2	2.5713	1145	sp|P87240|NOT2_SCHPO General negative regulator of transcription subunit 2 OS=Schizosaccharomyces pombe (strain 972 / ATCC 24843) OX=284812 GN=not2 PE=1 SV=2	34.478	3.9	7804.2	1	410.75
O42668	Tetratricopeptide repeat protein 1	tpr1	30.219	308	sp|O42668|TPR1_SCHPO Tetratricopeptide repeat protein 1 OS=Schizosaccharomyces pombe (strain 972 / ATCC 24843) OX=284812 GN=tpr1 PE=1 SV=1	119.15	6.7	21331	1	410.21
O42926	Vacuolar protein sorting-associated protein 13b	vps13b	8.966	343	sp|O42926|VP13B_SCHPO Vacuolar protein sorting-associated protein 13b OS=Schizosaccharomyces pombe (strain 972 / ATCC 24843) OX=284812 GN=vps13b PE=2 SV=1	354.02	1.7	61856	2	409.64
O42885	Putative inorganic phosphate transporter C8E4.01c		24.334	324	sp|O42885|YBN1_SCHPO Putative inorganic phosphate transporter C8E4.01c OS=Schizosaccharomyces pombe (strain 972 / ATCC 24843) OX=284812 GN=SPBC8E4.01c PE=1 SV=2	63.645	18.7	10160	1	406.41
P49731	DNA replication licensing factor mcm6	mcm6	18.992	1025	sp|P49731|MCM6_SCHPO DNA replication licensing factor mcm6 OS=Schizosaccharomyces pombe (strain 972 / ATCC 24843) OX=284812 GN=mcm6 PE=1 SV=2	99.549	7.7	20173	1	403.45
O13864	Importin subunit beta-1	kap95	31.374	131	sp|O13864|IMB1_SCHPO Importin subunit beta-1 OS=Schizosaccharomyces pombe (strain 972 / ATCC 24843) OX=284812 GN=kap95 PE=3 SV=1	94.746	10.4	9638.7	1	401.61
O14096	Queuine tRNA-ribosyltransferase-like protein	SPAC2F3.13c	6.2014	204	sp|O14096|QTRT2_SCHPO Queuine tRNA-ribosyltransferase accessory subunit 2 OS=Schizosaccharomyces pombe (strain 972 / ATCC 24843) OX=284812 GN=SPAC2F3.13c PE=3 SV=4	73.212	3.9	12425	1	400.79
Q9P6J6	Putative beta-glucosidase	SPBC1683.04	3.0261	1536	sp|Q9P6J6|BGLS_SCHPO Putative beta-glucosidase OS=Schizosaccharomyces pombe (strain 972 / ATCC 24843) OX=284812 GN=SPBC1683.04 PE=3 SV=1	93.168	1.7	17204	1	390.99
O43048	TBC domain-containing protein C215.01		4.7222	381	sp|O43048|YH51_SCHPO TBC domain-containing protein C215.01 OS=Schizosaccharomyces pombe (strain 972 / ATCC 24843) OX=284812 GN=SPBC215.01 PE=3 SV=4	95.005	3.7	16405	1	381.52
Q9UTT2	Pre-mRNA-splicing factor prp12	prp12	3.149	1805	sp|Q9UTT2|RSE1_SCHPO Pre-mRNA-splicing factor prp12 OS=Schizosaccharomyces pombe (strain 972 / ATCC 24843) OX=284812 GN=prp12 PE=1 SV=1	134.97	2.5	21200	2	378.57
P87112	General negative regulator of transcription subunit 1	not1	9.0468	1113	sp|P87112|NOT1_SCHPO General negative regulator of transcription subunit 1 OS=Schizosaccharomyces pombe (strain 972 / ATCC 24843) OX=284812 GN=not1 PE=1 SV=1	237.13	0.8	34244	1	372.22
O60094	DNA polymerase V	pol5	3.154	466	sp|O60094|DPO5_SCHPO rDNA transcriptional regulator pol5 OS=Schizosaccharomyces pombe (strain 972 / ATCC 24843) OX=284812 GN=pol5 PE=1 SV=2	109.72	2.9	17307	1	368.24
O14253	Nuclear cap-binding protein subunit 1	cbc1	8.8107	247	sp|O14253|NCBP1_SCHPO Nuclear cap-binding protein subunit 1 OS=Schizosaccharomyces pombe (strain 972 / ATCC 24843) OX=284812 GN=cbc1 PE=1 SV=1	90.077	4.5	15371	1	365.97
Q9UU76	Pumilio homology domain family member 6	puf6	1.5138	1806	sp|Q9UU76|PUF6_SCHPO Pumilio homology domain family member 6 OS=Schizosaccharomyces pombe (strain 972 / ATCC 24843) OX=284812 GN=puf6 PE=1 SV=1	72.634	2	10259	1	341.97
Q09833	tRNA (uracil(54)-C(5))-methyltransferase	SPAC4G8.07c	21.881	1248	sp|Q09833|YAD7_SCHPO tRNA (uracil(54)-C(5))-methyltransferase OS=Schizosaccharomyces pombe (strain 972 / ATCC 24843) OX=284812 GN=SPAC4G8.07c PE=3 SV=1	59.613	5.3	10934	1	341.69
Q09715	Transcriptional repressor tup11	tup11	5.0715	1201	sp|Q09715|TUP11_SCHPO Transcriptional repressor tup11 OS=Schizosaccharomyces pombe (strain 972 / ATCC 24843) OX=284812 GN=tup11 PE=1 SV=1	67.33	3.6	10446	1	336.98
P10506	Protein kinase byr1	byr1	4.4217	888	sp|P10506|BYR1_SCHPO Protein kinase byr1 OS=Schizosaccharomyces pombe (strain 972 / ATCC 24843) OX=284812 GN=byr1 PE=1 SV=1	38.188	5.3	5943.3	1	330.18
O14302	cytokinesis protein 3	cyk3	7.9916	261	sp|O14302|CYK3_SCHPO cytokinesis protein 3 OS=Schizosaccharomyces pombe (strain 972 / ATCC 24843) OX=284812 GN=cyk3 PE=1 SV=1	98.262	1.6	12118	1	252.46
O14057	Probable guanine deaminase	SPCC1672.03c	48.414	189	sp|O14057|GUAD_SCHPO Probable guanine deaminase OS=Schizosaccharomyces pombe (strain 972 / ATCC 24843) OX=284812 GN=SPCC1672.03c PE=3 SV=1	58.046	22	6475	3	249.04
P08096	DNA topoisomerase 2	top2	40.198	865	sp|P08096|TOP2_SCHPO DNA topoisomerase 2 OS=Schizosaccharomyces pombe (strain 972 / ATCC 24843) OX=284812 GN=top2 PE=1 SV=2	167.89	5.1	18920	1	248.95
P87115	UPF0202 protein C20G8.09c	SPAC20G8.09c	12.191	1115	sp|P87115|NAT10_SCHPO RNA cytidine acetyltransferase OS=Schizosaccharomyces pombe (strain 972 / ATCC 24843) OX=284812 GN=nat10 PE=1 SV=1	116.46	3.7	13916	1	248.51
Q10105	Translational activator gcn1	gcn1	4.5758	1304	sp|Q10105|GCN1_SCHPO eIF-2-alpha kinase activator gcn1 OS=Schizosaccharomyces pombe (strain 972 / ATCC 24843) OX=284812 GN=gcn1 PE=3 SV=1	297.33	1.1	32526	2	232.33
O60182	Replication factor C subunit 1	rfc1	8.0295	495	sp|O60182|RFC1_SCHPO Replication factor C subunit 1 OS=Schizosaccharomyces pombe (strain 972 / ATCC 24843) OX=284812 GN=rfc1 PE=1 SV=1	103.49	3.6	10610	1	225.75
Q9P778	Dipeptidyl-peptidase 5	SPBC1711.12	13.065	1561	sp|Q9P778|DPP5_SCHPO Dipeptidyl-peptidase 5 OS=Schizosaccharomyces pombe (strain 972 / ATCC 24843) OX=284812 GN=SPBC1711.12 PE=3 SV=1	77.765	9.1	7306	1	221.39
P37202	Exosome complex exonuclease dis3	dis3	3.1949	976	sp|P37202|DIS3_SCHPO Exosome complex exonuclease dis3 OS=Schizosaccharomyces pombe (strain 972 / ATCC 24843) OX=284812 GN=dis3 PE=1 SV=1	110.14	1.6	10814	1	212.03
O74454	Protein sts5	sts5	1.606	551	sp|O74454|STS5_SCHPO Protein sts5 OS=Schizosaccharomyces pombe (strain 972 / ATCC 24843) OX=284812 GN=sts5 PE=1 SV=1	117.6	1.8	9082.4	1	189.22
O94590	Protein transport protein sec1	sec1	8.9351	808	sp|O94590|SEC1_SCHPO Protein transport protein sec1 OS=Schizosaccharomyces pombe (strain 972 / ATCC 24843) OX=284812 GN=sec1 PE=3 SV=1	79.637	6.9	7119.1	1	173.64
O94441	Putative cargo-transport protein ypp1	ypp1	2.5977	766	sp|O94441|YPP1_SCHPO Putative cargo-transport protein ypp1 OS=Schizosaccharomyces pombe (strain 972 / ATCC 24843) OX=284812 GN=ypp1 PE=1 SV=1	98.306	3.6	8257.5	1	168.52
O13834	E3 ubiquitin-protein ligase ptr1	ptr1	19.038	117	sp|O13834|PTR1_SCHPO E3 ubiquitin-protein ligase ptr1 OS=Schizosaccharomyces pombe (strain 972 / ATCC 24843) OX=284812 GN=ptr1 PE=1 SV=1	365.03	3.7	21552	1	142.73
Q09798	PAB-dependent poly(A)-specific ribonuclease subunit PAN2	pan2	1.8676	1237	sp|Q09798|PAN2_SCHPO PAN2-PAN3 deadenylation complex catalytic subunit pan2 OS=Schizosaccharomyces pombe (strain 972 / ATCC 24843) OX=284812 GN=pan2 PE=3 SV=2	123.87	2.8	6778.3	1	123.24
A6X972	EKC/KEOPS complex subunit gon7	gon7	5.8501	1	sp|A6X972|GON7_SCHPO EKC/KEOPS complex subunit gon7 OS=Schizosaccharomyces pombe (strain 972 / ATCC 24843) OX=284812 GN=gon7 PE=3 SV=1	8.5686	17.8	0	0	0
C6Y4C6	Uncharacterized protein C29A10.17	SPBC29A10.17	2.5227	4	sp|C6Y4C6|YGSQ_SCHPO Uncharacterized protein C29A10.17 OS=Schizosaccharomyces pombe (strain 972 / ATCC 24843) OX=284812 GN=SPBC29A10.17 PE=1 SV=2	17.547	5.2	0	0	0
C6Y4C7	Uncharacterized membrane protein C757.15	SPCC757.15	1.7989	5	sp|C6Y4C7|YJ7O_SCHPO Uncharacterized membrane protein C757.15 OS=Schizosaccharomyces pombe (strain 972 / ATCC 24843) OX=284812 GN=SPCC757.15 PE=2 SV=1	7.99	24.6	0	0	0
G2TRJ9	Cytochrome c oxidase assembly factor 3, mitochondrial	coa3	1.8128	44	sp|G2TRJ9|COA3_SCHPO Cytochrome c oxidase assembly factor 3, mitochondrial OS=Schizosaccharomyces pombe (strain 972 / ATCC 24843) OX=284812 GN=coa3 PE=2 SV=1	7.8828	26.1	0	0	0
G2TRL7	S-phase delaying protein 2	spd2	2.6427	45	sp|G2TRL7|SPD2_SCHPO S-phase delaying protein 2 OS=Schizosaccharomyces pombe (strain 972 / ATCC 24843) OX=284812 GN=spd2 PE=3 SV=1	11.834	58.8	0	0	0
G2TRQ9	Uncharacterized protein tam10	tam10	1.6742	48	sp|G2TRQ9|TAM10_SCHPO Uncharacterized protein tam10 OS=Schizosaccharomyces pombe (strain 972 / ATCC 24843) OX=284812 GN=tam10 PE=1 SV=1	19.111	6.5	0	0	0
G2TRT6	NADH dehydrogenase [ubiquinone] 1 alpha subcomplex subunit 4 homolog	SPCC417.16	7.162	49	sp|G2TRT6|NDUA4_SCHPO NADH dehydrogenase [ubiquinone] 1 alpha subcomplex subunit 4 homolog OS=Schizosaccharomyces pombe (strain 972 / ATCC 24843) OX=284812 GN=SPCC417.16 PE=3 SV=1	5.6246	78.8	0	0	0
O00103	Ubiquitin-conjugating enzyme E2-20 kDa	ubc11	8.97	54	sp|O00103|UBC11_SCHPO Ubiquitin-conjugating enzyme E2-20 kDa OS=Schizosaccharomyces pombe (strain 972 / ATCC 24843) OX=284812 GN=ubc11 PE=3 SV=1	19.664	9.7	0	0	0
O13290	Dynein heavy chain, cytoplasmic	dhc1	2.1134	56	sp|O13290|DYHC_SCHPO Dynein heavy chain, cytoplasmic OS=Schizosaccharomyces pombe (strain 972 / ATCC 24843) OX=284812 GN=dhc1 PE=1 SV=1	484.31	0.4	0	0	0
O13621	Uncharacterized protein C691.05c		3.769	60	sp|O13621|YNG5_SCHPO Uncharacterized protein C691.05c OS=Schizosaccharomyces pombe (strain 972 / ATCC 24843) OX=284812 GN=pi030 PE=4 SV=1	76.67	6.1	0	0	0
O13633	Uncharacterized J domain-containing protein C17A3.05c		4.8498	62	sp|O13633|YNF5_SCHPO Uncharacterized J domain-containing protein C17A3.05c OS=Schizosaccharomyces pombe (strain 972 / ATCC 24843) OX=284812 GN=pi041 PE=1 SV=1	46.399	6.5	0	0	0
O13657	Putative metal ion transporter C27B12.12c		108.87	69	sp|O13657|YBCC_SCHPO Putative metal ion transporter C27B12.12c OS=Schizosaccharomyces pombe (strain 972 / ATCC 24843) OX=284812 GN=pi066 PE=1 SV=1	89.396	19.2	0	0	0
O13686	Uncharacterized RWD, RING finger and WD repeat-containing protein C11E3.05	SPAC11E3.05	8.1768	72	sp|O13686|WDR59_SCHPO Uncharacterized RWD, RING finger and WD repeat-containing protein C11E3.05 OS=Schizosaccharomyces pombe (strain 972 / ATCC 24843) OX=284812 GN=SPAC11E3.05 PE=1 SV=1	149.06	2.7	0	0	0
O13690	PH and SEC7 domain-containing protein C11E3.11c	SPAC11E3.11c	8.9338	74	sp|O13690|YDYB_SCHPO PH and SEC7 domain-containing protein C11E3.11c OS=Schizosaccharomyces pombe (strain 972 / ATCC 24843) OX=284812 GN=SPAC11E3.11c PE=4 SV=1	105.91	1.9	0	0	0
O13692	1,3-beta-glucanosyltransferase gas5	gas5	8.2674	75	sp|O13692|GAS5_SCHPO 1,3-beta-glucanosyltransferase gas5 OS=Schizosaccharomyces pombe (strain 972 / ATCC 24843) OX=284812 GN=gas5 PE=1 SV=1	53.692	11.2	0	0	0
O13711	Uncharacterized protein C14C4.04	SPAC14C4.04	19.91	78	sp|O13711|YDZ4_SCHPO Uncharacterized protein C14C4.04 OS=Schizosaccharomyces pombe (strain 972 / ATCC 24843) OX=284812 GN=SPAC14C4.04 PE=4 SV=1	29.71	15	0	0	0
O13739	Probable chorismate mutase	SPAC16E8.04c	7.0284	83	sp|O13739|CHMU_SCHPO Chorismate mutase OS=Schizosaccharomyces pombe (strain 972 / ATCC 24843) OX=284812 GN=aro7 PE=3 SV=1	29.05	9.2	0	0	0
O13741	Nucleolar protein 12	nop12	1.5234	84	sp|O13741|NOP12_SCHPO Nucleolar protein 12 OS=Schizosaccharomyces pombe (strain 972 / ATCC 24843) OX=284812 GN=nop12 PE=1 SV=1	49.38	3.7	0	0	0
O13742	V-type proton ATPase subunit a	vph1	30.377	85	sp|O13742|VPH1_SCHPO V-type proton ATPase subunit a OS=Schizosaccharomyces pombe (strain 972 / ATCC 24843) OX=284812 GN=vph1 PE=3 SV=2	94.158	14.9	0	0	0
O13750	Probable succinyl-CoA ligase [ADP-forming] subunit alpha, mitochondrial	SPAC16E8.17c	3.0409	86	sp|O13750|SUCA_SCHPO Succinate--CoA ligase [ADP-forming] subunit alpha, mitochondrial OS=Schizosaccharomyces pombe (strain 972 / ATCC 24843) OX=284812 GN=SPAC16E8.17c PE=3 SV=1	34.706	2.7	0	0	0
O13779	Putative metal ion transporter C17A12.14		3.7978	95	sp|O13779|YF2E_SCHPO Putative metal ion transporter C17A12.14 OS=Schizosaccharomyces pombe (strain 972 / ATCC 24843) OX=284812 GN=SPAC17A2.14 PE=1 SV=4	71.197	4.2	0	0	0
O13781	Uncharacterized protein C17G6.03	SPAC17G6.03	3.5624	96	sp|O13781|YEO3_SCHPO Uncharacterized protein C17G6.03 OS=Schizosaccharomyces pombe (strain 972 / ATCC 24843) OX=284812 GN=SPAC17G6.03 PE=3 SV=1	71.441	2.8	0	0	0
O13786	Vacuolar segregation protein pep7	pep7	1.58	99	sp|O13786|PEP7_SCHPO Vacuolar segregation protein pep7 OS=Schizosaccharomyces pombe (strain 972 / ATCC 24843) OX=284812 GN=pep7 PE=3 SV=1	62.434	2.8	0	0	0
O13787	Translocation protein sec62	sec62	1.7548	100	sp|O13787|SEC62_SCHPO Translocation protein sec62 OS=Schizosaccharomyces pombe (strain 972 / ATCC 24843) OX=284812 GN=sec62 PE=3 SV=1	31.585	8.8	0	0	0
O13793	Probable mitochondrial transport protein fsf1	fsf1	3.7397	103	sp|O13793|FSF1_SCHPO Sideroflexin fsf1 OS=Schizosaccharomyces pombe (strain 972 / ATCC 24843) OX=284812 GN=fsf1 PE=3 SV=2	35.447	12.4	0	0	0
O13794	Endoribonuclease ysh1	ysh1	2.3437	104	sp|O13794|YSH1_SCHPO Endoribonuclease ysh1 OS=Schizosaccharomyces pombe (strain 972 / ATCC 24843) OX=284812 GN=ysh1 PE=3 SV=2	85.989	2.6	0	0	0
O13830	Probable peptidyl-tRNA hydrolase 2	SPAC19A8.14	12.705	115	sp|O13830|PTH2_SCHPO Probable peptidyl-tRNA hydrolase 2 OS=Schizosaccharomyces pombe (strain 972 / ATCC 24843) OX=284812 GN=SPAC19A8.14 PE=1 SV=1	21.428	6.8	0	0	0
O13850	Ubiquinone biosynthesis protein coq9, mitochondrial	coq9	6.6387	125	sp|O13850|COQ9_SCHPO Ubiquinone biosynthesis protein coq9, mitochondrial OS=Schizosaccharomyces pombe (strain 972 / ATCC 24843) OX=284812 GN=coq9 PE=3 SV=1	28.084	6.4	0	0	0
O13853	Phosphatidylinositol 4-phosphate 5-kinase its3	its3	5.329	126	sp|O13853|ITS3_SCHPO Phosphatidylinositol 4-phosphate 5-kinase its3 OS=Schizosaccharomyces pombe (strain 972 / ATCC 24843) OX=284812 GN=its3 PE=1 SV=3	83.747	3.8	0	0	0
O13856	Uncharacterized WD repeat-containing protein C1A6.02		20.917	127	sp|O13856|YEX2_SCHPO Uncharacterized WD repeat-containing protein C1A6.02 OS=Schizosaccharomyces pombe (strain 972 / ATCC 24843) OX=284812 GN=SPAC1A6.02 PE=4 SV=1	39.779	4.7	0	0	0
O13857;O13857-2	Putative lysophospholipase C1A6.03c	SPAC1A6.03c	10.082	128	sp|O13857|PLB2_SCHPO Putative lysophospholipase SPAC1A6.03c OS=Schizosaccharomyces pombe (strain 972 / ATCC 24843) OX=284812 GN=SPAC1A6.03c PE=3 SV=4;sp|O13857-2|PLB2_SCHPO Isoform 2 of Putative lysophospholipase SPAC1A6.03c OS=Schizosaccharomyces pombe (s	73.041	5.9	0	0	0
O13870	General negative regulator of transcription subunit 3	not3	2.7013	133	sp|O13870|NOT3_SCHPO General negative regulator of transcription subunit 3 OS=Schizosaccharomyces pombe (strain 972 / ATCC 24843) OX=284812 GN=not3 PE=1 SV=2	72.759	3.9	0	0	0
O13918	Zinc homeostasis factor 1	zhf1	21.098	144	sp|O13918|ZHF1_SCHPO Zinc homeostasis factor 1 OS=Schizosaccharomyces pombe (strain 972 / ATCC 24843) OX=284812 GN=zhf1 PE=2 SV=3	42.941	3.9	0	0	0
O13919	Paired amphipathic helix protein pst2	pst2	3.5652	145	sp|O13919|PST2_SCHPO Paired amphipathic helix protein pst2 OS=Schizosaccharomyces pombe (strain 972 / ATCC 24843) OX=284812 GN=pst2 PE=1 SV=1	124.85	0.9	0	0	0
O13920	LETM1 domain-containing protein mdm28, mitochondrial	mdm28	6.5868	146	sp|O13920|MDM28_SCHPO LETM1 domain-containing protein mdm28, mitochondrial OS=Schizosaccharomyces pombe (strain 972 / ATCC 24843) OX=284812 GN=mdm28 PE=2 SV=3	55.723	7.8	0	0	0
O13939	AP-3 complex subunit beta	apl6	3.6328	152	sp|O13939|AP3B_SCHPO AP-3 complex subunit beta OS=Schizosaccharomyces pombe (strain 972 / ATCC 24843) OX=284812 GN=apl6 PE=1 SV=1	83.87	4.7	0	0	0
O13946	Endoplasmic reticulum vesicle protein 25	erv25	2.4035	155	sp|O13946|TMEDA_SCHPO Endoplasmic reticulum vesicle protein 25 OS=Schizosaccharomyces pombe (strain 972 / ATCC 24843) OX=284812 GN=erv25 PE=3 SV=1	24.485	20.4	0	0	0
O13950	Signal recognition particle receptor subunit beta	srp102	6.5284	156	sp|O13950|SRPB_SCHPO Signal recognition particle receptor subunit beta OS=Schizosaccharomyces pombe (strain 972 / ATCC 24843) OX=284812 GN=srp102 PE=3 SV=1	25.611	5.7	0	0	0
O13963	Diphosphomevalonate decarboxylase	mvd1	54.57	159	sp|O13963|MVD1_SCHPO Diphosphomevalonate decarboxylase OS=Schizosaccharomyces pombe (strain 972 / ATCC 24843) OX=284812 GN=mvd1 PE=3 SV=1	42.755	31.3	0	0	0
O13967	1,3-beta-glucan synthase component bgs2	bgs2	4.3817	161	sp|O13967|BGS2_SCHPO 1,3-beta-glucan synthase component bgs2 OS=Schizosaccharomyces pombe (strain 972 / ATCC 24843) OX=284812 GN=bgs2 PE=2 SV=2	219.18	3.1	0	1	0
O13968	Uncharacterized carboxypeptidase C24C9.08	SPAC24C9.08	19.364	162	sp|O13968|YE48_SCHPO Uncharacterized carboxypeptidase C24C9.08 OS=Schizosaccharomyces pombe (strain 972 / ATCC 24843) OX=284812 GN=SPAC24C9.08 PE=3 SV=1	66.606	5	0	0	0
O14026	Histone-lysine N-methyltransferase, H3 lysine-36 specific	set2	2.3535	176	sp|O14026|SET2_SCHPO Histone-lysine N-methyltransferase, H3 lysine-36 specific OS=Schizosaccharomyces pombe (strain 972 / ATCC 24843) OX=284812 GN=set2 PE=1 SV=1	90.678	1.5	0	0	0
O14030	Uncharacterized protein C29B12.08	SPAC29B12.08	17.183	178	sp|O14030|YEM8_SCHPO Uncharacterized protein C29B12.08 OS=Schizosaccharomyces pombe (strain 972 / ATCC 24843) OX=284812 GN=SPAC29B12.08 PE=4 SV=4	75.679	1.9	0	0	0
O14038	Uncharacterized protein C2C4.05	SPAC2C4.05	18.033	182	sp|O14038|YEY5_SCHPO Uncharacterized protein C2C4.05 OS=Schizosaccharomyces pombe (strain 972 / ATCC 24843) OX=284812 GN=SPAC2C4.05 PE=3 SV=1	15.738	15.7	0	0	0
O14039	25S rRNA (cytosine-C(5))-methyltransferase rcm1	rcm1	2.749	183	sp|O14039|RCM1_SCHPO 25S rRNA (cytosine-C(5))-methyltransferase rcm1 OS=Schizosaccharomyces pombe (strain 972 / ATCC 24843) OX=284812 GN=rcm1 PE=3 SV=3	51.876	4.1	0	0	0
O14044	Pre-rRNA-processing protein pno1	rbp28	7.1546	184	sp|O14044|PNO1_SCHPO Pre-rRNA-processing protein pno1 OS=Schizosaccharomyces pombe (strain 972 / ATCC 24843) OX=284812 GN=rbp28 PE=1 SV=2	26.393	10	0	0	0
O14050	Uncharacterized MscS family protein C2C4.17c	SPAC2C4.17c	14.077	187	sp|O14050|MSY2_SCHPO Mechanosensitive ion channel protein Msy2 OS=Schizosaccharomyces pombe (strain 972 / ATCC 24843) OX=284812 GN=msy2 PE=1 SV=1	94.643	3.3	0	0	0
O14103	Protein rot1	rot1	1.93	206	sp|O14103|ROT1_SCHPO Protein rot1 OS=Schizosaccharomyces pombe (strain 972 / ATCC 24843) OX=284812 GN=rot1 PE=3 SV=1	26.432	5.6	0	0	0
O14114	Uncharacterized AAA domain-containing protein C31G5.19	SPAC31G5.19	35.776	211	sp|O14114|YEJJ_SCHPO Uncharacterized AAA domain-containing protein C31G5.19 OS=Schizosaccharomyces pombe (strain 972 / ATCC 24843) OX=284812 GN=SPAC31G5.19 PE=1 SV=1	135.35	8.2	0	0	0
O14115	Patatin-like phospholipase domain-containing protein SPAC1786.01c		1.8522	212	sp|O14115|TGL4_SCHPO Triacylglycerol lipase ptl2 OS=Schizosaccharomyces pombe (strain 972 / ATCC 24843) OX=284812 GN=ptl2 PE=3 SV=2	72.521	2.2	0	0	0
O14125	Uncharacterized oxidoreductase C3A11.11c	SPAC3A11.11c	2.5196	214	sp|O14125|YEZB_SCHPO Uncharacterized oxidoreductase C3A11.11c OS=Schizosaccharomyces pombe (strain 972 / ATCC 24843) OX=284812 GN=SPAC3A11.11c PE=3 SV=1	36.878	4.8	0	0	0
O14142	Protein sym1	sym1	3.2711	220	sp|O14142|SYM1_SCHPO Protein sym1 OS=Schizosaccharomyces pombe (strain 972 / ATCC 24843) OX=284812 GN=sym1 PE=3 SV=1	23.409	7.3	0	0	0
O14145	Trehalose-phosphatase	tps2	4.7562	221	sp|O14145|TPS2_SCHPO Trehalose-phosphatase OS=Schizosaccharomyces pombe (strain 972 / ATCC 24843) OX=284812 GN=tps2 PE=3 SV=1	96.34	3.1	0	0	0
O14171	Dehydrodolichyl diphosphate syntase complex subunit SPAC4D7.04c	SPAC4D7.04c	2.3388	224	sp|O14171|YE54_SCHPO Dehydrodolichyl diphosphate synthase complex subunit SPAC4D7.04c OS=Schizosaccharomyces pombe (strain 972 / ATCC 24843) OX=284812 GN=SPAC4D7.04c PE=1 SV=2	30.543	5.3	0	0	0
O14176	Pre-mRNA-processing protein prp40	prp40	2.5543	225	sp|O14176|PRP40_SCHPO Pre-mRNA-processing protein prp40 OS=Schizosaccharomyces pombe (strain 972 / ATCC 24843) OX=284812 GN=prp40 PE=1 SV=1	81.929	3.9	0	0	0
O14187	Pre-mRNA-splicing factor spp42	spp42	22.554	227	sp|O14187|SPP42_SCHPO Pre-mRNA-splicing factor spp42 OS=Schizosaccharomyces pombe (strain 972 / ATCC 24843) OX=284812 GN=spp42 PE=1 SV=1	274.55	2.5	0	0	0
O14195	Uncharacterized N-acetyltransferase C56E4.07	SPAC56E4.07	20.871	229	sp|O14195|YF07_SCHPO Uncharacterized N-acetyltransferase C56E4.07 OS=Schizosaccharomyces pombe (strain 972 / ATCC 24843) OX=284812 GN=SPAC56E4.07 PE=3 SV=3	27.134	7.2	0	0	0
O14214	tRNA (guanine(9)-N1)-methyltransferase	trm10	3.8783	232	sp|O14214|TRM10_SCHPO tRNA (guanine(9)-N1)-methyltransferase OS=Schizosaccharomyces pombe (strain 972 / ATCC 24843) OX=284812 GN=trm10 PE=1 SV=1	35.47	5.3	0	0	0
O14215	DNA primase small subunit	pri1	3.2597	233	sp|O14215|PRI1_SCHPO DNA primase small subunit OS=Schizosaccharomyces pombe (strain 972 / ATCC 24843) OX=284812 GN=pri1 PE=1 SV=1	52.009	2.6	0	0	0
O14218	Type 1 phosphatases regulator ypi1	ypi1	3.4561	235	sp|O14218|YPI1_SCHPO Type 1 phosphatases regulator ypi1 OS=Schizosaccharomyces pombe (strain 972 / ATCC 24843) OX=284812 GN=ypi1 PE=3 SV=1	11.659	12.5	0	0	0
O14223	Golgi apparatus membrane protein tvp15	tvp15	3.8615	236	sp|O14223|TVP15_SCHPO Golgi apparatus membrane protein tvp15 OS=Schizosaccharomyces pombe (strain 972 / ATCC 24843) OX=284812 GN=tvp15 PE=3 SV=2	14.518	8.3	0	0	0
O14238	Probable dolichyl-diphosphooligosaccharide--protein glycosyltransferase subunit ost2	ost2	33.898	242	sp|O14238|OST2_SCHPO Probable dolichyl-diphosphooligosaccharide--protein glycosyltransferase subunit ost2 OS=Schizosaccharomyces pombe (strain 972 / ATCC 24843) OX=284812 GN=ost2 PE=3 SV=1	13.333	26.2	0	0	0
O14249	probable cardiolipin-specific deacylase, mitochondrial	SPAC6G10.03c	2.0304	245	sp|O14249|CLD1_SCHPO Probable cardiolipin-specific deacylase 1, mitochondrial OS=Schizosaccharomyces pombe (strain 972 / ATCC 24843) OX=284812 GN=SPAC6G10.03c PE=3 SV=1	48.72	2.3	0	0	0
O14290	Uncharacterized protein C9E9.04	SPAC9E9.04	13.211	256	sp|O14290|YF14_SCHPO Uncharacterized protein C9E9.04 OS=Schizosaccharomyces pombe (strain 972 / ATCC 24843) OX=284812 GN=SPAC9E9.04 PE=4 SV=1	21.238	23.4	0	0	0
O14300	Mitochondrial inner membrane protein oxa1-1	oxa101	4.2412	259	sp|O14300|OXA11_SCHPO Mitochondrial inner membrane protein oxa1-1 OS=Schizosaccharomyces pombe (strain 972 / ATCC 24843) OX=284812 GN=oxa101 PE=2 SV=1	42.06	3.2	0	0	0
O14319	CUE domain-containing protein 5	SPBC16E9.02c	2.2735	265	sp|O14319|CUE5_SCHPO CUE domain-containing protein 5 OS=Schizosaccharomyces pombe (strain 972 / ATCC 24843) OX=284812 GN=SPBC16E9.02c PE=4 SV=1	63.725	4.7	0	0	0
O14327	Polyadenylate-binding protein 2	pab2	3.6131	269	sp|O14327|PAB2_SCHPO Polyadenylate-binding protein 2 OS=Schizosaccharomyces pombe (strain 972 / ATCC 24843) OX=284812 GN=pab2 PE=1 SV=1	18.461	7.8	0	0	0
O14352	Probable U6 snRNA-associated Sm-like protein LSm4	lsm4	1.6712	278	sp|O14352|LSM4_SCHPO Probable U6 snRNA-associated Sm-like protein LSm4 OS=Schizosaccharomyces pombe (strain 972 / ATCC 24843) OX=284812 GN=lsm4 PE=1 SV=1	13.941	16.5	0	0	0
O14399	Ubiquitin-like protein 1	ubl1	33.639	287	sp|O14399|UBL1_SCHPO Ubiquitin-like protein 1 OS=Schizosaccharomyces pombe (strain 972 / ATCC 24843) OX=284812 GN=ubl1 PE=3 SV=1	8.6609	17.9	0	0	0
O36014	Aspartyl aminopeptidase 1	aap1	4.8099	293	sp|O36014|DNPEP_SCHPO Aspartyl aminopeptidase 1 OS=Schizosaccharomyces pombe (strain 972 / ATCC 24843) OX=284812 GN=aap1 PE=1 SV=1	51.74	5.8	0	0	0
O36022	Mannan polymerase complex subunit mnn9	mnn9	17.502	296	sp|O36022|MNN9_SCHPO Mannan polymerase complex subunit mnn9 OS=Schizosaccharomyces pombe (strain 972 / ATCC 24843) OX=284812 GN=mnn9 PE=3 SV=1	38.296	20.5	0	0	0
O42648	HMG box-containing protein C10F6.08c	SPAC10F6.08c	2.5122	302	sp|O42648|YF98_SCHPO HMG box-containing protein C10F6.08c OS=Schizosaccharomyces pombe (strain 972 / ATCC 24843) OX=284812 GN=SPAC10F6.08c PE=1 SV=1	38.243	4.1	0	0	0
O42650	Serine/threonine-protein kinase rio1	rio1	7.9114	304	sp|O42650|RIO1_SCHPO Serine/threonine-protein kinase rio1 OS=Schizosaccharomyces pombe (strain 972 / ATCC 24843) OX=284812 GN=rio1 PE=3 SV=2	57.498	2.6	0	0	0
O42665	Uncharacterized but2-like protein C27D7.11c	SPAC27D7.11c	53.215	307	sp|O42665|YF8B_SCHPO Uncharacterized but2-like protein C27D7.11c OS=Schizosaccharomyces pombe (strain 972 / ATCC 24843) OX=284812 GN=SPAC27D7.11c PE=3 SV=1	48.392	4.8	0	0	0
O42706	60S ribosomal protein L21-B	rpl21b	25.244	311	sp|O42706|RL21B_SCHPO 60S ribosomal protein L21-B OS=Schizosaccharomyces pombe (strain 972 / ATCC 24843) OX=284812 GN=rpl2102 PE=2 SV=2	18.353	41.2	0	3	0
O42707	L-type lectin-like domain-containing protein C4F6.05c	SPBC4F6.05c	21.919	312	sp|O42707|YOC5_SCHPO L-type lectin-like domain-containing protein C4F6.05c OS=Schizosaccharomyces pombe (strain 972 / ATCC 24843) OX=284812 GN=SPBC4F6.05c PE=2 SV=2	42.768	17.4	0	0	0
O42843	Uncharacterized membrane protein C23A1.05	SPAC23A1.05	1.5399	314	sp|O42843|YFH5_SCHPO Uncharacterized membrane protein C23A1.05 OS=Schizosaccharomyces pombe (strain 972 / ATCC 24843) OX=284812 GN=SPAC23A1.05 PE=4 SV=1	11.653	6.9	0	0	0
O42890	Copper amine oxidase-like protein cao2	cao2	4.043	327	sp|O42890|CAO2_SCHPO Copper amine oxidase-like protein cao2 OS=Schizosaccharomyces pombe (strain 972 / ATCC 24843) OX=284812 GN=cao2 PE=3 SV=1	90.126	5.3	0	1	0
O42896	Uncharacterized oxidoreductase C115.03		5.4977	330	sp|O42896|YBQ3_SCHPO Uncharacterized oxidoreductase C115.03 OS=Schizosaccharomyces pombe (strain 972 / ATCC 24843) OX=284812 GN=SPBC115.03 PE=3 SV=1	41.271	6.2	0	0	0
O42899	Protein sco1	sco1	6.4768	333	sp|O42899|SCO1_SCHPO Protein sco1 OS=Schizosaccharomyces pombe (strain 972 / ATCC 24843) OX=284812 GN=sco1 PE=3 SV=1	30.239	14.1	0	0	0
O42903	GRIP domain-containing protein C119.12	SPBC119.12	1.5745	334	sp|O42903|YBAC_SCHPO GRIP domain-containing protein C119.12 OS=Schizosaccharomyces pombe (strain 972 / ATCC 24843) OX=284812 GN=SPBC119.12 PE=2 SV=1	46.153	4.7	0	0	0
O42930	Vacuolar protein sorting/targeting protein 10	vps10	6.5053	345	sp|O42930|VPS10_SCHPO Vacuolar protein sorting/targeting protein 10 OS=Schizosaccharomyces pombe (strain 972 / ATCC 24843) OX=284812 GN=vps10 PE=1 SV=1	165.06	1	0	0	0
O42933	Dolichyl-phosphate-mannose--protein mannosyltransferase 4	ogm4	9.7035	348	sp|O42933|PMT4_SCHPO Dolichyl-phosphate-mannose--protein mannosyltransferase 4 OS=Schizosaccharomyces pombe (strain 972 / ATCC 24843) OX=284812 GN=ogm4 PE=3 SV=1	90.09	1.4	0	0	0
O42939	Ubiquitin-activating enzyme E1-like	uba2	2.0904	352	sp|O42939|UBA2_SCHPO Ubiquitin-activating enzyme E1-like OS=Schizosaccharomyces pombe (strain 972 / ATCC 24843) OX=284812 GN=uba2 PE=1 SV=1	70.613	2.9	0	0	0
O42964	Transcription factor iws1	iws1	5.2217	357	sp|O42964|IWS1_SCHPO Transcription factor iws1 OS=Schizosaccharomyces pombe (strain 972 / ATCC 24843) OX=284812 GN=iws1 PE=3 SV=1	49.114	4.4	0	0	0
O42965	Uncharacterized protein C19G7.17		1.5488	358	sp|O42965|YGMH_SCHPO Uncharacterized protein C19G7.17 OS=Schizosaccharomyces pombe (strain 972 / ATCC 24843) OX=284812 GN=SPBC19G7.17 PE=4 SV=2	52.438	4	0	0	0
O42980	NEDD8-specific protease 1	nep1	21.731	359	sp|O42980|NESP1_SCHPO NEDD8-specific protease 1 OS=Schizosaccharomyces pombe (strain 972 / ATCC 24843) OX=284812 GN=nep1 PE=1 SV=2	47.257	9.5	0	0	0
O42999	Mitochondrial import receptor subunit tom7	tom7	1.8417	362	sp|O42999|TOM7_SCHPO Mitochondrial import receptor subunit tom7 OS=Schizosaccharomyces pombe (strain 972 / ATCC 24843) OX=284812 GN=tom7 PE=3 SV=2	6.0391	19.2	0	0	0
O43007	C-1-tetrahydrofolate synthase, mitochondrial;Methylenetetrahydrofolate dehydrogenase;Methenyltetrahydrofolate cyclohydrolase;Formyltetrahydrofolate synthetase	ade9	3.7182	365	sp|O43007|C1TM_SCHPO C-1-tetrahydrofolate synthase, mitochondrial OS=Schizosaccharomyces pombe (strain 972 / ATCC 24843) OX=284812 GN=ade9 PE=3 SV=3	105.76	1.9	0	0	0
O43046	V-type proton ATPase subunit F	vma7	10.055	379	sp|O43046|VATF_SCHPO V-type proton ATPase subunit F OS=Schizosaccharomyces pombe (strain 972 / ATCC 24843) OX=284812 GN=vma7 PE=3 SV=1	13.618	69.2	0	0	0
O43053	Probable dolichyl pyrophosphate Man9GlcNAc2 alpha-1,3-glucosyltransferase	alg6	2.4484	384	sp|O43053|ALG6_SCHPO Probable dolichyl pyrophosphate Man9GlcNAc2 alpha-1,3-glucosyltransferase OS=Schizosaccharomyces pombe (strain 972 / ATCC 24843) OX=284812 GN=alg6 PE=3 SV=1	59.203	3.4	0	0	0
O43062	Uncharacterized protein C4C3.09	SPBC4C3.09	2.8251	389	sp|O43062|YGT9_SCHPO Uncharacterized protein C4C3.09 OS=Schizosaccharomyces pombe (strain 972 / ATCC 24843) OX=284812 GN=SPBC4C3.09 PE=4 SV=1	44.095	3.7	0	0	0
O43065	Probable helicase mot1	mot1	10.853	391	sp|O43065|MOT1_SCHPO Probable helicase mot1 OS=Schizosaccharomyces pombe (strain 972 / ATCC 24843) OX=284812 GN=mot1 PE=1 SV=4	217.63	2.6	0	0	0
O43071	Pre-mRNA-processing factor 17	prp17	7.8516	392	sp|O43071|PRP17_SCHPO Pre-mRNA-processing factor 17 OS=Schizosaccharomyces pombe (strain 972 / ATCC 24843) OX=284812 GN=prp17 PE=1 SV=1	63.132	8.1	0	0	0
O43073	UPF0220 protein C8D2.02c		3.7104	393	sp|O43073|YGW2_SCHPO UPF0220 protein C8D2.02c OS=Schizosaccharomyces pombe (strain 972 / ATCC 24843) OX=284812 GN=pi063 PE=3 SV=1	18.816	10.6	0	0	0
O43076	Protein shq1	shq1	2.3144	394	sp|O43076|SHQ1_SCHPO Protein shq1 OS=Schizosaccharomyces pombe (strain 972 / ATCC 24843) OX=284812 GN=shq1 PE=3 SV=1	52.392	3.1	0	0	0
O43090	Probable NADH-ubiquinone oxidoreductase C947.15c, mitochondrial	SPBC947.15c	11.224	397	sp|O43090|NDH2_SCHPO Probable NADH-ubiquinone oxidoreductase C947.15c, mitochondrial OS=Schizosaccharomyces pombe (strain 972 / ATCC 24843) OX=284812 GN=SPBC947.15c PE=3 SV=1	60.78	9.3	0	0	0
O43125	Protein csh3	csh3	21.73	398	sp|O43125|CSH3_SCHPO Protein csh3 OS=Schizosaccharomyces pombe (strain 972 / ATCC 24843) OX=284812 GN=csh3 PE=2 SV=1	31.736	7.1	0	0	0
O59670	Splicing factor 3B subunit 6-like protein	SPBC29A3.07c	2.7908	400	sp|O59670|SF3B6_SCHPO Splicing factor 3B subunit 6-like protein OS=Schizosaccharomyces pombe (strain 972 / ATCC 24843) OX=284812 GN=SPBC29A3.07c PE=3 SV=2	13.276	12.2	0	0	0
O59673	ATP synthase subunit H, mitochondrial	atp14	6.4938	402	sp|O59673|ATP14_SCHPO ATP synthase subunit H, mitochondrial OS=Schizosaccharomyces pombe (strain 972 / ATCC 24843) OX=284812 GN=atp14 PE=3 SV=1	11.57	19.4	0	0	0
O59677	37S ribosomal protein S23, mitochondrial	rsm23	2.3984	404	sp|O59677|RT23_SCHPO 37S ribosomal protein S23, mitochondrial OS=Schizosaccharomyces pombe (strain 972 / ATCC 24843) OX=284812 GN=rsm23 PE=3 SV=1	53.229	4.8	0	0	0
O59700	Uncharacterized transporter C36.03c	SPBC36.03c	5.6304	409	sp|O59700|YN43_SCHPO Uncharacterized transporter C36.03c OS=Schizosaccharomyces pombe (strain 972 / ATCC 24843) OX=284812 GN=SPBC36.03c PE=3 SV=1	59.169	4.6	0	0	0
O59734	Small nuclear ribonucleoprotein F	smf1	6.1495	416	sp|O59734|RUXF_SCHPO Small nuclear ribonucleoprotein F OS=Schizosaccharomyces pombe (strain 972 / ATCC 24843) OX=284812 GN=smf1 PE=1 SV=1	8.66	12.8	0	0	0
O59739	BAG family molecular chaperone regulator 1B	bag102	26.149	419	sp|O59739|BAG1B_SCHPO BAG family molecular chaperone regulator 1B OS=Schizosaccharomyces pombe (strain 972 / ATCC 24843) OX=284812 GN=bag102 PE=1 SV=1	23.325	15.5	0	0	0
O59751	Kinesin-like protein 6	klp6	1.7718	421	sp|O59751|KLP6_SCHPO Kinesin-like protein 6 OS=Schizosaccharomyces pombe (strain 972 / ATCC 24843) OX=284812 GN=klp6 PE=1 SV=1	87.795	3.3	0	1	0
O59768	Vacuolar calcium ion transporter	vcx1	12.75	425	sp|O59768|VCX1_SCHPO Vacuolar calcium ion transporter OS=Schizosaccharomyces pombe (strain 972 / ATCC 24843) OX=284812 GN=vcx1 PE=3 SV=1	45.108	3.4	0	0	0
O59772	37S ribosomal protein subunit sws2, mitochondrial	sws2	2.3571	428	sp|O59772|SWS2_SCHPO 37S ribosomal protein subunit sws2, mitochondrial OS=Schizosaccharomyces pombe (strain 972 / ATCC 24843) OX=284812 GN=sws2 PE=3 SV=1	17.149	9.9	0	0	0
O59809	Probable importin c550.11	SPCC550.11	7.7336	437	sp|O59809|IMA3_SCHPO Probable importin c550.11 OS=Schizosaccharomyces pombe (strain 972 / ATCC 24843) OX=284812 GN=SPCC550.11 PE=3 SV=1	116.47	3.2	0	0	0
O59819	Probable UTP--glucose-1-phosphate uridylyltransferase	SPCC794.10	5.2153	443	sp|O59819|UGPA2_SCHPO Probable UTP--glucose-1-phosphate uridylyltransferase OS=Schizosaccharomyces pombe (strain 972 / ATCC 24843) OX=284812 GN=SPCC794.10 PE=3 SV=1	56.74	5.8	0	0	0
O59823	V-type proton ATPase subunit D	vma8	13.123	444	sp|O59823|VATD_SCHPO V-type proton ATPase subunit D OS=Schizosaccharomyces pombe (strain 972 / ATCC 24843) OX=284812 GN=vma8 PE=1 SV=1	32.219	14	0	0	0
O59824	ATP-dependent zinc metalloprotease YME1 homolog	SPCC965.04c	3.9461	445	sp|O59824|YME1_SCHPO ATP-dependent zinc metalloprotease YME1 homolog OS=Schizosaccharomyces pombe (strain 972 / ATCC 24843) OX=284812 GN=SPCC965.04c PE=3 SV=1	78.217	2.5	0	0	0
O59833	Uncharacterized transporter C965.13	SPCC965.13	1.7536	448	sp|O59833|YCUD_SCHPO Uncharacterized transporter C965.13 OS=Schizosaccharomyces pombe (strain 972 / ATCC 24843) OX=284812 GN=SPCC965.13 PE=3 SV=1	59.706	6	0	0	0
O60081	Uncharacterized protein C1494.07	SPCC1494.07	5.4985	462	sp|O60081|YQK7_SCHPO Uncharacterized protein C1494.07 OS=Schizosaccharomyces pombe (strain 972 / ATCC 24843) OX=284812 GN=SPCC1494.07 PE=3 SV=1	171.17	1.1	0	0	0
O60084	Mitochondrial import inner membrane translocase subunit tim44	tim44	32.061	463	sp|O60084|TIM44_SCHPO Mitochondrial import inner membrane translocase subunit tim44 OS=Schizosaccharomyces pombe (strain 972 / ATCC 24843) OX=284812 GN=tim44 PE=3 SV=1	48.549	13.3	0	0	0
O60110	TPR repeat protein oca3	oca3	6.3858	473	sp|O60110|OCA3_SCHPO TPR repeat protein oca3 OS=Schizosaccharomyces pombe (strain 972 / ATCC 24843) OX=284812 GN=oca3 PE=4 SV=3	32.822	5.3	0	0	0
O60111	ABC1 family protein MCP2 homolog	SPBC15C4.02	3.6998	474	sp|O60111|MCP2L_SCHPO ABC1 family protein MCP2 homolog OS=Schizosaccharomyces pombe (strain 972 / ATCC 24843) OX=284812 GN=SPBC15C4.02 PE=3 SV=2	64.113	2.3	0	0	0
O60123	Pheromone-processing carboxypeptidase kex1	kex1	3.7084	478	sp|O60123|KEX1_SCHPO Pheromone-processing carboxypeptidase kex1 OS=Schizosaccharomyces pombe (strain 972 / ATCC 24843) OX=284812 GN=kex1 PE=3 SV=1	57.643	3.7	0	0	0
O60150	Uncharacterized protein C18H10.20c	SPBC18H10.20c	2.7091	483	sp|O60150|YNSK_SCHPO Uncharacterized protein C18H10.20c OS=Schizosaccharomyces pombe (strain 972 / ATCC 24843) OX=284812 GN=SPBC18H10.20c PE=1 SV=1	40.144	3.6	0	0	0
O60160	O-glycoside alpha-1,2-mannosyltransferase omh1	omh1	7.0766	486	sp|O60160|OMH1_SCHPO O-glycoside alpha-1,2-mannosyltransferase omh1 OS=Schizosaccharomyces pombe (strain 972 / ATCC 24843) OX=284812 GN=omh1 PE=3 SV=1	46.514	11	0	0	0
O60169	Uncharacterized protein C19F8.05	SPBC19F8.05	20.794	491	sp|O60169|YHC5_SCHPO Uncharacterized protein C19F8.05 OS=Schizosaccharomyces pombe (strain 972 / ATCC 24843) OX=284812 GN=SPBC19F8.05 PE=4 SV=1	25.359	6.9	0	0	0
O60181	3,4-dihydroxy-2-butanone 4-phosphate synthase	SPBC23E6.06c	95.847	494	sp|O60181|RIB3_SCHPO 3,4-dihydroxy-2-butanone 4-phosphate synthase OS=Schizosaccharomyces pombe (strain 972 / ATCC 24843) OX=284812 GN=SPBC23E6.06c PE=3 SV=1	22.564	66.2	0	0	0
O74174	V-type proton ATPase subunit G	vma10	11.979	501	sp|O74174|VATG_SCHPO V-type proton ATPase subunit G OS=Schizosaccharomyces pombe (strain 972 / ATCC 24843) OX=284812 GN=vma10 PE=3 SV=2	12.162	31.5	0	0	0
O74310	COBW domain-containing protein C15D4.05	SPBC15D4.05	4.1909	507	sp|O74310|YOG5_SCHPO COBW domain-containing protein C15D4.05 OS=Schizosaccharomyces pombe (strain 972 / ATCC 24843) OX=284812 GN=SPBC15D4.05 PE=3 SV=1	46.314	3.9	0	0	0
O74323	Signal peptidase complex catalytic subunit sec11	sec11	4.8897	510	sp|O74323|SEC11_SCHPO Signal peptidase complex catalytic subunit sec11 OS=Schizosaccharomyces pombe (strain 972 / ATCC 24843) OX=284812 GN=sec11 PE=3 SV=1	21.403	8.5	0	0	0
O74343	Putative pseudouridine synthase C1A4.09	SPBC1A4.09	5.7789	515	sp|O74343|PUS7_SCHPO Multisubstrate pseudouridine synthase 7 OS=Schizosaccharomyces pombe (strain 972 / ATCC 24843) OX=284812 GN=pus7 PE=3 SV=1	76.437	5.3	0	0	0
O74354	Nucleolar protein dnt1	dnt1	47.21	518	sp|O74354|DNT1_SCHPO Nucleolar protein dnt1 OS=Schizosaccharomyces pombe (strain 972 / ATCC 24843) OX=284812 GN=dnt1 PE=1 SV=1	65.977	29	0	0	0
O74360	Probable Rho-type GTPase-activating protein 4	rga4	3.8848	519	sp|O74360|RGA4_SCHPO Probable Rho-type GTPase-activating protein 4 OS=Schizosaccharomyces pombe (strain 972 / ATCC 24843) OX=284812 GN=rga4 PE=1 SV=2	104.49	1.4	0	0	0
O74369	Inositol phosphosphingolipids phospholipase C	css1	6.736	520	sp|O74369|CSS1_SCHPO Inositol phosphosphingolipids phospholipase C OS=Schizosaccharomyces pombe (strain 972 / ATCC 24843) OX=284812 GN=css1 PE=1 SV=2	48.345	6.6	0	0	0
O74375	Golgi apparatus membrane protein tvp18	tvp18	4.5951	522	sp|O74375|TVP18_SCHPO Golgi apparatus membrane protein tvp18 OS=Schizosaccharomyces pombe (strain 972 / ATCC 24843) OX=284812 GN=tvp18 PE=3 SV=1	17.922	5.5	0	0	0
O74382	Probable phosphoserine phosphatase	SPBC3H7.07c	12.266	524	sp|O74382|SERB_SCHPO Probable phosphoserine phosphatase OS=Schizosaccharomyces pombe (strain 972 / ATCC 24843) OX=284812 GN=SPBC3H7.07c PE=2 SV=1	32.411	30.9	0	0	0
O74386	Uncharacterized methyltransferase C3H7.11	SPBC3H7.11	4.0143	525	sp|O74386|YNVB_SCHPO Uncharacterized methyltransferase C3H7.11 OS=Schizosaccharomyces pombe (strain 972 / ATCC 24843) OX=284812 GN=SPBC3H7.11 PE=3 SV=1	28.877	7.7	0	0	0
O74394	54S ribosomal protein L39, mitochondrial	mrpl39	7.4551	528	sp|O74394|RM39_SCHPO 54S ribosomal protein L39, mitochondrial OS=Schizosaccharomyces pombe (strain 972 / ATCC 24843) OX=284812 GN=mrpl39 PE=3 SV=1	6.3527	23.6	0	0	0
O74395	Siderophore iron transporter 1	str1	7.4876	529	sp|O74395|STR1_SCHPO Siderophore iron transporter 1 OS=Schizosaccharomyces pombe (strain 972 / ATCC 24843) OX=284812 GN=str1 PE=1 SV=1	68.155	2.1	0	0	0
O74399	Ribosome biogenesis protein erb1	erb1	3.8418	531	sp|O74399|ERB1_SCHPO Ribosome biogenesis protein erb1 OS=Schizosaccharomyces pombe (strain 972 / ATCC 24843) OX=284812 GN=erb1 PE=1 SV=2	82.944	2	0	0	0
O74401	ERO1-like protein 1	ero11	28.489	532	sp|O74401|ERO11_SCHPO ERO1-like protein 1 OS=Schizosaccharomyces pombe (strain 972 / ATCC 24843) OX=284812 GN=ero11 PE=1 SV=1	54.625	12	0	0	0
O74421	Ubiquinone biosynthesis O-methyltransferase, mitochondrial	coq3	1.4966	539	sp|O74421|COQ3_SCHPO Ubiquinone biosynthesis O-methyltransferase, mitochondrial OS=Schizosaccharomyces pombe (strain 972 / ATCC 24843) OX=284812 GN=coq3 PE=3 SV=2	30.826	4.4	0	0	0
O74423	Epsin-1	ent1	2.3027	540	sp|O74423|ENT1_SCHPO Epsin-1 OS=Schizosaccharomyces pombe (strain 972 / ATCC 24843) OX=284812 GN=ent1 PE=1 SV=2	79.75	9.1	0	0	0
O74424	Nucleoporin nup211	nup211	1.8581	541	sp|O74424|NU211_SCHPO Nucleoporin nup211 OS=Schizosaccharomyces pombe (strain 972 / ATCC 24843) OX=284812 GN=nup211 PE=1 SV=1	211.46	1.5	0	1	0
O74439	Uncharacterized mitochondrial carrier C1682.09c	SPCC1682.09c	44.925	546	sp|O74439|YJE9_SCHPO Uncharacterized mitochondrial carrier C1682.09c OS=Schizosaccharomyces pombe (strain 972 / ATCC 24843) OX=284812 GN=SPCC1682.09c PE=3 SV=1	33.047	19.7	0	0	0
O74457	N-terminal acetyltransferase B complex catalytic subunit naa20	naa20	1.5344	553	sp|O74457|NAT3_SCHPO N-terminal acetyltransferase B complex catalytic subunit naa20 OS=Schizosaccharomyces pombe (strain 972 / ATCC 24843) OX=284812 GN=naa20 PE=3 SV=1	20.521	10.6	0	0	0
O74468	Probable uroporphyrinogen-III C-methyltransferase	SPCC1739.06c	1.9266	555	sp|O74468|SUMT_SCHPO Probable uroporphyrinogen-III C-methyltransferase OS=Schizosaccharomyces pombe (strain 972 / ATCC 24843) OX=284812 GN=SPCC1739.06c PE=2 SV=1	54.711	3.4	0	0	0
O74472	Meiotically up-regulated gene 33 protein	mug33	9.4053	557	sp|O74472|MUG33_SCHPO Meiotically up-regulated gene 33 protein OS=Schizosaccharomyces pombe (strain 972 / ATCC 24843) OX=284812 GN=mug33 PE=1 SV=1	37.074	9.5	0	0	0
O74479	ATP synthase subunit 5, mitochondrial	atp5	4.1762	561	sp|O74479|ATPO_SCHPO ATP synthase subunit 5, mitochondrial OS=Schizosaccharomyces pombe (strain 972 / ATCC 24843) OX=284812 GN=atp5 PE=3 SV=2	23.988	5.1	0	0	0
O74482	Uncharacterized protein C1840.09	SPCC1840.09	6.1877	562	sp|O74482|YQJ9_SCHPO Uncharacterized protein C1840.09 OS=Schizosaccharomyces pombe (strain 972 / ATCC 24843) OX=284812 GN=SPCC1840.09 PE=3 SV=1	29.919	6.9	0	0	0
O74502	DNA mismatch repair protein msh6	msh6	1.7553	568	sp|O74502|MSH6_SCHPO DNA mismatch repair protein msh6 OS=Schizosaccharomyces pombe (strain 972 / ATCC 24843) OX=284812 GN=msh6 PE=1 SV=1	141.51	0.8	0	0	0
O74505	Uncharacterized protein C594.02c	SPCC594.02c	16.854	571	sp|O74505|YJD2_SCHPO Uncharacterized protein C594.02c OS=Schizosaccharomyces pombe (strain 972 / ATCC 24843) OX=284812 GN=SPCC594.02c PE=1 SV=1	54.866	2.5	0	0	0
O74508	Set1 complex component spp1	spp1	3.3697	572	sp|O74508|SPP1_SCHPO Set1 complex component spp1 OS=Schizosaccharomyces pombe (strain 972 / ATCC 24843) OX=284812 GN=spp1 PE=4 SV=1	48.682	5	0	0	0
O74533	Cytochrome b-c1 complex subunit 7	qcr7	24.083	579	sp|O74533|QCR7_SCHPO Cytochrome b-c1 complex subunit 7 OS=Schizosaccharomyces pombe (strain 972 / ATCC 24843) OX=284812 GN=qcr7 PE=3 SV=1	16.03	41.6	0	0	0
O74551	Uncharacterized protein C777.12c	SPCC777.12c	2.4999	586	sp|O74551|YCVC_SCHPO Uncharacterized protein C777.12c OS=Schizosaccharomyces pombe (strain 972 / ATCC 24843) OX=284812 GN=SPCC777.12c PE=3 SV=1	26.889	9.2	0	0	0
O74552	Vacuolar protein sorting-associated protein 35	vps35	6.9376	587	sp|O74552|VPS35_SCHPO Vacuolar protein sorting-associated protein 35 OS=Schizosaccharomyces pombe (strain 972 / ATCC 24843) OX=284812 GN=vps35 PE=1 SV=2	96.407	3	0	0	0
O74729	Peptidyl-prolyl cis-trans isomerase cyp3	cyp3	5.8716	596	sp|O74729|PPIH_SCHPO Peptidyl-prolyl cis-trans isomerase cyp3 OS=Schizosaccharomyces pombe (strain 972 / ATCC 24843) OX=284812 GN=cyp3 PE=3 SV=1	18.905	12.7	0	0	0
O74732	3-keto-steroid reductase	erg27	2.2377	597	sp|O74732|ERG27_SCHPO 3-keto-steroid reductase OS=Schizosaccharomyces pombe (strain 972 / ATCC 24843) OX=284812 GN=erg27 PE=2 SV=1	38.724	3.6	0	0	0
O74735	Metal homeostasis factor atx1	atx1	3.9861	598	sp|O74735|ATX1_SCHPO Metal homeostasis factor atx1 OS=Schizosaccharomyces pombe (strain 972 / ATCC 24843) OX=284812 GN=atx1 PE=3 SV=1	7.6618	29.4	0	0	0
O74740	Cleavage factor two protein 2	cft2	8.962	599	sp|O74740|CFT2_SCHPO Cleavage factor two protein 2 OS=Schizosaccharomyces pombe (strain 972 / ATCC 24843) OX=284812 GN=cft2 PE=1 SV=1	89.45	2.4	0	0	0
O74743	Eukaryotic translation initiation factor 4E-2	tif452	9.6666	601	sp|O74743|IF4E2_SCHPO Eukaryotic translation initiation factor 4E-2 OS=Schizosaccharomyces pombe (strain 972 / ATCC 24843) OX=284812 GN=tif452 PE=3 SV=1	27.653	6.6	0	0	0
O74745	Mannan polymerase II complex anp1 subunit	anp1	16.645	602	sp|O74745|ANP1_SCHPO Mannan polymerase II complex anp1 subunit OS=Schizosaccharomyces pombe (strain 972 / ATCC 24843) OX=284812 GN=anp1 PE=3 SV=1	48.99	9.8	0	0	0
O74754	ATP synthase subunit gamma, mitochondrial	atp3	4.2739	604	sp|O74754|ATPG_SCHPO ATP synthase subunit gamma, mitochondrial OS=Schizosaccharomyces pombe (strain 972 / ATCC 24843) OX=284812 GN=atp3 PE=3 SV=1	33.577	4	0	0	0
O74773	DNA mismatch repair protein msh2	msh2	3.4091	611	sp|O74773|MSH2_SCHPO DNA mismatch repair protein msh2 OS=Schizosaccharomyces pombe (strain 972 / ATCC 24843) OX=284812 GN=msh2 PE=3 SV=2	109.74	2.1	0	0	0
O74786	Protein transport protein sec9	sec9	1.5363	614	sp|O74786|SEC9_SCHPO Protein transport protein sec9 OS=Schizosaccharomyces pombe (strain 972 / ATCC 24843) OX=284812 GN=sec9 PE=1 SV=1	46.43	3.1	0	0	0
O74789	Putative serine/threonine-protein phosphatase C26H8.05c	SPBC26H8.05c	9.7083	616	sp|O74789|YOU5_SCHPO Putative serine/threonine-protein phosphatase C26H8.05c OS=Schizosaccharomyces pombe (strain 972 / ATCC 24843) OX=284812 GN=SPBC26H8.05c PE=1 SV=1	39.215	12.4	0	0	0
O74791	GTPase grn1	grn1	9.4487	618	sp|O74791|GRN1_SCHPO GTPase grn1 OS=Schizosaccharomyces pombe (strain 972 / ATCC 24843) OX=284812 GN=grn1 PE=1 SV=1	52.434	11.5	0	0	0
O74794	Putative cytochrome c heme lyase	SPBC26H8.12	10.48	620	sp|O74794|CCHL_SCHPO Putative holocytochrome-c synthase OS=Schizosaccharomyces pombe (strain 972 / ATCC 24843) OX=284812 GN=SPBC26H8.12 PE=3 SV=1	42.879	6.1	0	0	0
O74820	Ergosterol biosynthetic protein 28	erg28	25.309	624	sp|O74820|ERG28_SCHPO Ergosterol biosynthetic protein 28 OS=Schizosaccharomyces pombe (strain 972 / ATCC 24843) OX=284812 GN=erg28 PE=3 SV=1	15.252	10.3	0	0	0
O74825	DNA-directed RNA polymerase II subunit rpb4	rpb4	5.8948	626	sp|O74825|RPB4_SCHPO DNA-directed RNA polymerase II subunit rpb4 OS=Schizosaccharomyces pombe (strain 972 / ATCC 24843) OX=284812 GN=rpb4 PE=1 SV=1	15.361	7.4	0	0	0
O74826	5-demethoxyubiquinone hydroxylase, mitochondrial	coq7	7.4328	627	sp|O74826|COQ7_SCHPO 5-demethoxyubiquinone hydroxylase, mitochondrial OS=Schizosaccharomyces pombe (strain 972 / ATCC 24843) OX=284812 GN=coq7 PE=3 SV=1	24.397	18.1	0	0	0
O74828	Pre-rRNA-processing protein esf1	esf1	31.278	629	sp|O74828|ESF1_SCHPO Pre-rRNA-processing protein esf1 OS=Schizosaccharomyces pombe (strain 972 / ATCC 24843) OX=284812 GN=esf1 PE=1 SV=1	77.753	12.6	0	0	0
O74837	Plasma membrane proteolipid 31	pmp31	5.1318	632	sp|O74837|PMP31_SCHPO Plasma membrane proteolipid 31 OS=Schizosaccharomyces pombe (strain 972 / ATCC 24843) OX=284812 GN=pmp31 PE=1 SV=2	11.962	30.3	0	0	0
O74839	Uncharacterized MscS family protein C1183.11		29.758	633	sp|O74839|MSY1_SCHPO Mechanosensitive ion channel protein Msy1 OS=Schizosaccharomyces pombe (strain 972 / ATCC 24843) OX=284812 GN=msy1 PE=1 SV=1	114.27	7.1	0	0	0
O74850	Diacylglycerol O-acyltransferase 1	dga1	5.2026	636	sp|O74850|DGAT2_SCHPO Diacylglycerol O-acyltransferase 1 OS=Schizosaccharomyces pombe (strain 972 / ATCC 24843) OX=284812 GN=dga1 PE=1 SV=3	39.485	5.8	0	0	0
O74855	Ribosome assembly protein 4	SPCC18.05c	2.0024	637	sp|O74855|NLE1_SCHPO Ribosome assembly protein 4 OS=Schizosaccharomyces pombe (strain 972 / ATCC 24843) OX=284812 GN=rsa4 PE=3 SV=1	56.003	4.4	0	0	0
O74857	DNA-directed RNA polymerase III subunit rpc4	rpc53	1.9575	639	sp|O74857|RPC4_SCHPO DNA-directed RNA polymerase III subunit rpc4 OS=Schizosaccharomyces pombe (strain 972 / ATCC 24843) OX=284812 GN=rpc53 PE=2 SV=1	36.871	2.7	0	0	0
O74861	Set1 complex component sdc1	sdc1	22.936	640	sp|O74861|SDC1_SCHPO Set1 complex component sdc1 OS=Schizosaccharomyces pombe (strain 972 / ATCC 24843) OX=284812 GN=sdc1 PE=3 SV=1	11.856	21.1	0	0	0
O74866	Riboflavin kinase	fmn1	5.7244	644	sp|O74866|RIFK_SCHPO Riboflavin kinase OS=Schizosaccharomyces pombe (strain 972 / ATCC 24843) OX=284812 GN=fmn1 PE=1 SV=1	18.913	14.7	0	0	0
O74867	Uncharacterized protein C18.17c	SPCC18.17c	2.7024	645	sp|O74867|YQ9H_SCHPO Uncharacterized protein C18.17c OS=Schizosaccharomyces pombe (strain 972 / ATCC 24843) OX=284812 GN=SPCC18.17c PE=4 SV=1	55.357	2.9	0	0	0
O74871	Uncharacterized protein C31H12.03c	SPCC31H12.03c	6.9398	646	sp|O74871|YCW3_SCHPO Uncharacterized protein C31H12.03c OS=Schizosaccharomyces pombe (strain 972 / ATCC 24843) OX=284812 GN=SPCC31H12.03c PE=1 SV=1	26.781	19.2	0	0	0
O74878	GDP-Man:Man(3)GlcNAc(2)-PP-Dol alpha-1,2-mannosyltransferase	alg11	2.6064	649	sp|O74878|ALG11_SCHPO GDP-Man:Man(3)GlcNAc(2)-PP-Dol alpha-1,2-mannosyltransferase OS=Schizosaccharomyces pombe (strain 972 / ATCC 24843) OX=284812 GN=alg11 PE=3 SV=1	53.277	3.2	0	0	0
O74882	Succinate dehydrogenase cytochrome B subunit, mitochondrial	sdh3	4.5658	651	sp|O74882|SDH3_SCHPO Succinate dehydrogenase cytochrome B subunit, mitochondrial OS=Schizosaccharomyces pombe (strain 972 / ATCC 24843) OX=284812 GN=sdh3 PE=3 SV=1	20.136	8.9	0	0	0
O74883	DNA-directed RNA polymerase III subunit rpc5	rpc37	2.2968	652	sp|O74883|RPC5_SCHPO DNA-directed RNA polymerase III subunit rpc5 OS=Schizosaccharomyces pombe (strain 972 / ATCC 24843) OX=284812 GN=rpc37 PE=3 SV=1	27.385	4.5	0	0	0
O74903	Uncharacterized calcium-binding protein C613.03	SPCC613.03	3.05	662	sp|O74903|YCS3_SCHPO Uncharacterized calcium-binding protein C613.03 OS=Schizosaccharomyces pombe (strain 972 / ATCC 24843) OX=284812 GN=SPCC613.03 PE=3 SV=1	22.475	20.6	0	0	0
O74906	Putative box C/D snoRNA protein SPCC613.07	SPCC613.07	2.6521	665	sp|O74906|BCD1_SCHPO Putative box C/D snoRNA protein SPCC613.07 OS=Schizosaccharomyces pombe (strain 972 / ATCC 24843) OX=284812 GN=SPCC613.07 PE=1 SV=1	39.31	4.9	0	0	0
O74907	Protein bcp1	bcp1	15.756	666	sp|O74907|BCP1_SCHPO Protein bcp1 OS=Schizosaccharomyces pombe (strain 972 / ATCC 24843) OX=284812 GN=bcp1 PE=3 SV=2	32.368	7.8	0	0	0
O74958	YTH domain-containing protein mmi1	mmi1	2.5165	676	sp|O74958|MMI1_SCHPO RNA binding exosome specificity factor Mmi1 OS=Schizosaccharomyces pombe (strain 972 / ATCC 24843) OX=284812 GN=mmi1 PE=1 SV=3	54.538	7	0	0	0
O74959	Uncharacterized oxidoreductase C736.13	SPCC736.13	21.525	677	sp|O74959|YJCD_SCHPO Uncharacterized oxidoreductase C736.13 OS=Schizosaccharomyces pombe (strain 972 / ATCC 24843) OX=284812 GN=SPCC736.13 PE=3 SV=1	38.513	14.7	0	0	0
O74962	Pantothenate kinase	SPBC4B4.01c	4.3471	679	sp|O74962|PANK_SCHPO Pantothenate kinase OS=Schizosaccharomyces pombe (strain 972 / ATCC 24843) OX=284812 GN=SPBC4B4.01c PE=1 SV=1	44.861	8.4	0	0	0
O74964	Chromatin structure-remodeling complex subunit rsc1	rsc1	1.9039	680	sp|O74964|RSC1_SCHPO Chromatin structure-remodeling complex subunit rsc1 OS=Schizosaccharomyces pombe (strain 972 / ATCC 24843) OX=284812 GN=rsc1 PE=1 SV=1	90.131	2.5	0	0	0
O74970	Pre-mRNA-processing factor 39	prp39	11.446	683	sp|O74970|PRP39_SCHPO Pre-mRNA-processing factor 39 OS=Schizosaccharomyces pombe (strain 972 / ATCC 24843) OX=284812 GN=prp39 PE=3 SV=1	71.246	7.4	0	0	0
O94260	Putative G3BP-like protein	nxt3	1.7726	697	sp|O94260|G3BP_SCHPO Putative G3BP-like protein OS=Schizosaccharomyces pombe (strain 972 / ATCC 24843) OX=284812 GN=nxt3 PE=1 SV=1	47.972	1.8	0	0	0
O94268	25S rRNA (cytosine-C(5))-methyltransferase nop2	SPBP8B7.20c	7.2837	700	sp|O94268|NOP2_SCHPO 25S rRNA (cytosine-C(5))-methyltransferase nop2 OS=Schizosaccharomyces pombe (strain 972 / ATCC 24843) OX=284812 GN=nop2 PE=1 SV=1	68.934	7.1	0	0	0
O94280	UPF0674 endoplasmic reticulum membrane protein C2G5.01	SPBC2G5.01	5.6885	706	sp|O94280|YGX1_SCHPO UPF0674 endoplasmic reticulum membrane protein C2G5.01 OS=Schizosaccharomyces pombe (strain 972 / ATCC 24843) OX=284812 GN=SPBC2G5.01 PE=3 SV=1	43.097	8.6	0	0	0
O94286	1,2-dihydroxy-3-keto-5-methylthiopentene dioxygenase	adi1	5.2891	710	sp|O94286|MTND_SCHPO 1,2-dihydroxy-3-keto-5-methylthiopentene dioxygenase OS=Schizosaccharomyces pombe (strain 972 / ATCC 24843) OX=284812 GN=adi1 PE=1 SV=1	20.936	7.3	0	0	0
O94296	Probable phospholipid-transporting ATPase C887.12	SPBC887.12	2.9351	712	sp|O94296|YOOC_SCHPO Probable phospholipid-transporting ATPase C887.12 OS=Schizosaccharomyces pombe (strain 972 / ATCC 24843) OX=284812 GN=SPBC887.12 PE=3 SV=1	142.38	1.2	0	0	0
O94298	Sphingolipid C4-hydroxylase sur2	sur2	8.2239	713	sp|O94298|SUR2_SCHPO Sphingolipid C4-hydroxylase sur2 OS=Schizosaccharomyces pombe (strain 972 / ATCC 24843) OX=284812 GN=sur2 PE=3 SV=1	34.19	4.4	0	0	0
O94311	UPF0743 protein C215.06c	SPBC215.06c	6.6694	718	sp|O94311|YH56_SCHPO UPF0743 protein C215.06c OS=Schizosaccharomyces pombe (strain 972 / ATCC 24843) OX=284812 GN=SPBC215.06c PE=1 SV=2	20.532	11.1	0	0	0
O94312	PWWP domain-containing protein2	pdp2	9.0233	719	sp|O94312|PDP2_SCHPO PWWP domain-containing protein2 OS=Schizosaccharomyces pombe (strain 972 / ATCC 24843) OX=284812 GN=pdp2 PE=1 SV=1	62.824	8.5	0	0	0
O94314	Uncharacterized hydrolase C215.10	SPBC215.10	5.7814	721	sp|O94314|YH5A_SCHPO Uncharacterized hydrolase C215.10 OS=Schizosaccharomyces pombe (strain 972 / ATCC 24843) OX=284812 GN=SPBC215.10 PE=3 SV=1	33.261	6	0	0	0
O94323	Uncharacterized pyrophosphatase/phosphodiesterase C725.05c	SPBC725.05c	1.6167	727	sp|O94323|YGK5_SCHPO Uncharacterized pyrophosphatase/phosphodiesterase C725.05c OS=Schizosaccharomyces pombe (strain 972 / ATCC 24843) OX=284812 GN=SPBC725.05c PE=3 SV=1	55.148	2.5	0	0	0
O94345	54S ribosomal protein L8, mitochondrial	mrpl8	4.6842	733	sp|O94345|RM08_SCHPO 54S ribosomal protein L8, mitochondrial OS=Schizosaccharomyces pombe (strain 972 / ATCC 24843) OX=284812 GN=mrpl8 PE=3 SV=1	23.967	9.7	0	0	0
O94346	Arginine biosynthesis bifunctional protein ArgJ, mitochondrial;Glutamate N-acetyltransferase;Amino-acid acetyltransferase;Arginine biosynthesis bifunctional protein ArgJ alpha chain;Arginine biosynthesis bifunctional protein ArgJ beta chain	SPBC1271.14	11.683	734	sp|O94346|ARGJ_SCHPO Arginine biosynthesis bifunctional protein ArgJ, mitochondrial OS=Schizosaccharomyces pombe (strain 972 / ATCC 24843) OX=284812 GN=SPBC1271.14 PE=3 SV=1	47.287	14.6	0	0	0
O94353	Nuclear membrane organization protein apq12	apq12	13.198	737	sp|O94353|APQ12_SCHPO Nuclear membrane organization protein apq12 OS=Schizosaccharomyces pombe (strain 972 / ATCC 24843) OX=284812 GN=apq12 PE=3 SV=1	12.762	30.4	0	0	0
O94370	Uncharacterized mitochondrial carrier C1604.04	SPBC1604.04	30.427	743	sp|O94370|YG04_SCHPO Uncharacterized mitochondrial carrier C1604.04 OS=Schizosaccharomyces pombe (strain 972 / ATCC 24843) OX=284812 GN=SPBC1604.04 PE=3 SV=2	31.025	12.7	0	0	0
O94373	ATP synthase subunit 4, mitochondrial	atp4	19.963	744	sp|O94373|ATPF_SCHPO ATP synthase subunit 4, mitochondrial OS=Schizosaccharomyces pombe (strain 972 / ATCC 24843) OX=284812 GN=atp4 PE=3 SV=1	26.7	27	0	0	0
O94385	Nucleoporin pom152	pom152	2.674	746	sp|O94385|PO152_SCHPO Nucleoporin pom152 OS=Schizosaccharomyces pombe (strain 972 / ATCC 24843) OX=284812 GN=pom152 PE=3 SV=3	139.58	1	0	1	0
O94390	ATP synthase subunit d, mitochondrial	atp7	5.5526	748	sp|O94390|ATP7_SCHPO ATP synthase subunit d, mitochondrial OS=Schizosaccharomyces pombe (strain 972 / ATCC 24843) OX=284812 GN=atp7 PE=3 SV=3	19.138	12.6	0	0	0
O94412	Geranylgeranyl transferase type-2 subunit alpha	bet4	1.8697	756	sp|O94412|PGTA_SCHPO Geranylgeranyl transferase type-2 subunit alpha OS=Schizosaccharomyces pombe (strain 972 / ATCC 24843) OX=284812 GN=bet4 PE=3 SV=1	41.194	7.6	0	0	0
O94415	Probable succinyl-CoA ligase [GDP-forming] subunit beta, mitochondrial	SPCC1620.08	2.0606	758	sp|O94415|SUCB_SCHPO Succinate--CoA ligase [ADP-forming] subunit beta, mitochondrial OS=Schizosaccharomyces pombe (strain 972 / ATCC 24843) OX=284812 GN=SPCC1620.08 PE=3 SV=1	47.287	3	0	0	0
O94443	Uncharacterized exonuclease C637.09	SPAC637.09	1.6826	768	sp|O94443|YFE9_SCHPO Uncharacterized exonuclease C637.09 OS=Schizosaccharomyces pombe (strain 972 / ATCC 24843) OX=284812 GN=SPAC637.09 PE=3 SV=2	71.47	2.2	0	0	0
O94447	Cytoskeletal signaling protein slm1	slm1	3.7462	770	sp|O94447|SLM1_SCHPO Cytoskeletal signaling protein slm1 OS=Schizosaccharomyces pombe (strain 972 / ATCC 24843) OX=284812 GN=slm1 PE=1 SV=1	56.087	3	0	0	0
O94504	Thioredoxin-2, mitochondrial	trx2	3.8192	780	sp|O94504|TRX2_SCHPO Thioredoxin-2, mitochondrial OS=Schizosaccharomyces pombe (strain 972 / ATCC 24843) OX=284812 GN=trx2 PE=1 SV=2	15.079	12.8	0	0	0
O94522	Chromatin structure-remodeling complex subunit rsc7	rsc7	2.1929	788	sp|O94522|RSC7_SCHPO Chromatin structure-remodeling complex subunit rsc7 OS=Schizosaccharomyces pombe (strain 972 / ATCC 24843) OX=284812 GN=rsc7 PE=1 SV=1	44.008	6.4	0	0	0
O94550	Prohibitin-2	phb2	12.502	795	sp|O94550|PHB2_SCHPO Prohibitin-2 OS=Schizosaccharomyces pombe (strain 972 / ATCC 24843) OX=284812 GN=phb2 PE=1 SV=2	32.338	14.2	0	0	0
O94581	Cytochrome c oxidase subunit 6B	cox12	2.9	805	sp|O94581|COX12_SCHPO Cytochrome c oxidase subunit 12, mitochondrial OS=Schizosaccharomyces pombe (strain 972 / ATCC 24843) OX=284812 GN=cox12 PE=3 SV=2	10.264	14	0	0	0
O94612	Uncharacterized cyclin-L1-like protein C1296.05c	SPAC1296.05c	2.3395	811	sp|O94612|YFO5_SCHPO Uncharacterized cyclin-L1-like protein C1296.05c OS=Schizosaccharomyces pombe (strain 972 / ATCC 24843) OX=284812 GN=SPAC1296.05c PE=3 SV=1	29.389	11.2	0	0	0
O94620	Pre-mRNA-splicing factor cwf17	cwf17	1.9289	815	sp|O94620|CWF17_SCHPO Pre-mRNA-splicing factor cwf17 OS=Schizosaccharomyces pombe (strain 972 / ATCC 24843) OX=284812 GN=cwf17 PE=1 SV=1	37.427	7.9	0	0	0
O94624	Mitochondrial import inner membrane translocase subunit tim54	tim54	2.1312	816	sp|O94624|TIM54_SCHPO Mitochondrial import inner membrane translocase subunit tim54 OS=Schizosaccharomyces pombe (strain 972 / ATCC 24843) OX=284812 GN=tim54 PE=3 SV=1	39.803	3.2	0	0	0
O94625	DnaJ-related protein spj1	spj1	12.972	817	sp|O94625|SPJ1_SCHPO DnaJ-related protein spj1 OS=Schizosaccharomyces pombe (strain 972 / ATCC 24843) OX=284812 GN=spj1 PE=2 SV=2	42.383	10.5	0	0	0
O94640	NAD-dependent histone deacetylase sir2	sir2	1.8768	821	sp|O94640|SIR2_SCHPO NAD-dependent histone deacetylase sir2 OS=Schizosaccharomyces pombe (strain 972 / ATCC 24843) OX=284812 GN=sir2 PE=1 SV=2	53.442	3.2	0	0	0
O94655	GTP-binding protein ypt7	ypt7	10.302	825	sp|O94655|YPT7_SCHPO Ypt/Rab-type GTPase ypt7 OS=Schizosaccharomyces pombe (strain 972 / ATCC 24843) OX=284812 GN=ypt7 PE=3 SV=1	22.994	4.9	0	0	0
O94675	Mitochondrial acidic protein mam33	SPBC776.07	5.3497	835	sp|O94675|MAM33_SCHPO Mitochondrial acidic protein mam33 OS=Schizosaccharomyces pombe (strain 972 / ATCC 24843) OX=284812 GN=SPBC776.07 PE=3 SV=1	30.616	12.6	0	0	0
O94702	Putative endoplasmic reticulum metallopeptidase 1	erm1	26.087	842	sp|O94702|ERMP1_SCHPO Putative endoplasmic reticulum metallopeptidase 1 OS=Schizosaccharomyces pombe (strain 972 / ATCC 24843) OX=284812 GN=erm1 PE=3 SV=1	91.841	5.4	0	0	0
O94715	40S ribosomal protein S15-A	rps15a	10.024	843	sp|O94715|RS15A_SCHPO 40S ribosomal protein S15-A OS=Schizosaccharomyces pombe (strain 972 / ATCC 24843) OX=284812 GN=rps1501 PE=3 SV=1	17.519	54.2	0	2	0
P08094	60S acidic ribosomal protein P2-alpha	rpp201	41.517	864	sp|P08094|RLA2_SCHPO 60S acidic ribosomal protein P2-alpha OS=Schizosaccharomyces pombe (strain 972 / ATCC 24843) OX=284812 GN=rpp201 PE=1 SV=1	11.158	34.5	0	3	0
P0CAN9	Uncharacterized protein PB1A10.16, mitochondrial	SPAPB1A10.16	2.5704	870	sp|P0CAN9|YK1G_SCHPO Uncharacterized protein PB1A10.16, mitochondrial OS=Schizosaccharomyces pombe (strain 972 / ATCC 24843) OX=284812 GN=SPAPB1A10.16 PE=4 SV=1	16.838	8.4	0	0	0
P21911	Succinate dehydrogenase [ubiquinone] iron-sulfur subunit, mitochondrial	sdh2	5.5887	910	sp|P21911|SDHB_SCHPO Succinate dehydrogenase [ubiquinone] iron-sulfur subunit, mitochondrial OS=Schizosaccharomyces pombe (strain 972 / ATCC 24843) OX=284812 GN=sdh2 PE=3 SV=3	31.425	8	0	0	0
P28040	DNA polymerase alpha catalytic subunit	pol1	4.6854	923	sp|P28040|DPOA_SCHPO DNA polymerase alpha catalytic subunit OS=Schizosaccharomyces pombe (strain 972 / ATCC 24843) OX=284812 GN=pol1 PE=1 SV=1	159.35	1.5	0	0	0
P31317	Ornithine carbamoyltransferase, mitochondrial	arg3	29.848	934	sp|P31317|OTC_SCHPO Ornithine carbamoyltransferase, mitochondrial OS=Schizosaccharomyces pombe (strain 972 / ATCC 24843) OX=284812 GN=arg3 PE=1 SV=1	36.119	33.6	0	0	0
P32834	Aspartic proteinase sxa1	sxa1	5.7371	941	sp|P32834|SXA1_SCHPO Aspartic proteinase sxa1 OS=Schizosaccharomyces pombe (strain 972 / ATCC 24843) OX=284812 GN=sxa1 PE=3 SV=2	56.852	3.4	0	0	0
P33277	GTPase-activating protein	gap1	1.4709	943	sp|P33277|GAP1_SCHPO GTPase-activating protein OS=Schizosaccharomyces pombe (strain 972 / ATCC 24843) OX=284812 GN=gap1 PE=4 SV=1	87.539	1	0	0	0
P36585	60S ribosomal protein L28-A	rpl28a	13.703	954	sp|P36585|RL28A_SCHPO 60S ribosomal protein L28-A OS=Schizosaccharomyces pombe (strain 972 / ATCC 24843) OX=284812 GN=rpl2802 PE=3 SV=3	16.653	30.4	0	3	0
P36607	DNA repair protein rad8	rad8	1.5969	967	sp|P36607|RAD5_SCHPO DNA repair protein rad8 OS=Schizosaccharomyces pombe (strain 972 / ATCC 24843) OX=284812 GN=rad8 PE=1 SV=1	128.61	1	0	0	0
P36617	DNA repair protein rad16	rad16	2.704	970	sp|P36617|RAD16_SCHPO DNA repair protein rad16 OS=Schizosaccharomyces pombe (strain 972 / ATCC 24843) OX=284812 GN=rad16 PE=1 SV=2	100.26	2.7	0	0	0
P40369	Argininosuccinate lyase	arg7	2.3446	983	sp|P40369|ARLY_SCHPO Argininosuccinate lyase OS=Schizosaccharomyces pombe (strain 972 / ATCC 24843) OX=284812 GN=arg7 PE=3 SV=2	51.738	12.1	0	0	0
P40371	Protein phosphatase 2C homolog 1	ptc1	2.7089	985	sp|P40371|PP2C1_SCHPO Protein phosphatase 2C homolog 1 OS=Schizosaccharomyces pombe (strain 972 / ATCC 24843) OX=284812 GN=ptc1 PE=2 SV=1	38.676	4.3	0	0	0
P40376	cAMP-dependent protein kinase catalytic subunit	pka1	2.47	990	sp|P40376|KAPB_SCHPO cAMP-dependent protein kinase catalytic subunit OS=Schizosaccharomyces pombe (strain 972 / ATCC 24843) OX=284812 GN=pka1 PE=1 SV=1	57.577	4.5	0	0	0
P40902	Sexual differentiation process protein isp7	isp7	8.8222	999	sp|P40902|ISP7_SCHPO Sexual differentiation process protein isp7 OS=Schizosaccharomyces pombe (strain 972 / ATCC 24843) OX=284812 GN=isp7 PE=2 SV=1	43.81	14.1	0	0	0
P41893	Low molecular weight phosphotyrosine protein phosphatase	stp1	3.9206	1016	sp|P41893|PPAL_SCHPO Low molecular weight phosphotyrosine protein phosphatase OS=Schizosaccharomyces pombe (strain 972 / ATCC 24843) OX=284812 GN=stp1 PE=2 SV=1	17.391	14.7	0	0	0
P50537	Malic acid transport protein	mae1	2.0839	1037	sp|P50537|MAE1_SCHPO Malic acid transport protein OS=Schizosaccharomyces pombe (strain 972 / ATCC 24843) OX=284812 GN=mae1 PE=1 SV=1	49.304	2.3	0	0	0
P54069	Protein bem46	bem46	13.425	1043	sp|P54069|BEM46_SCHPO Protein bem46 OS=Schizosaccharomyces pombe (strain 972 / ATCC 24843) OX=284812 GN=bem46 PE=2 SV=3	33.133	10.7	0	0	0
P78763	Uncharacterized mitochondrial carrier C83.13	SPBC83.13	8.4227	1056	sp|P78763|YG1D_SCHPO Uncharacterized mitochondrial carrier C83.13 OS=Schizosaccharomyces pombe (strain 972 / ATCC 24843) OX=284812 GN=SPBC83.13 PE=2 SV=2	31.575	11.6	0	0	0
P78768	Vesicle transport v-SNARE protein vti1	vti1	5.835	1057	sp|P78768|VTI1_SCHPO Vesicle transport v-SNARE protein vti1 OS=Schizosaccharomyces pombe (strain 972 / ATCC 24843) OX=284812 GN=vti1 PE=2 SV=2	24.743	8.9	0	0	0
P78813	ENTH domain-containing protein C794.11c	SPCC794.11c	1.9424	1069	sp|P78813|YCTB_SCHPO ENTH domain-containing protein C794.11c OS=Schizosaccharomyces pombe (strain 972 / ATCC 24843) OX=284812 GN=SPCC794.11c PE=1 SV=2	51.751	6.7	0	0	0
P78871	Zinc finger protein rst2	rst2	2.6677	1079	sp|P78871|RST2_SCHPO Zinc finger protein rst2 OS=Schizosaccharomyces pombe (strain 972 / ATCC 24843) OX=284812 GN=rst2 PE=2 SV=2	62.559	2.5	0	0	0
P79088	Protein transport protein sec61 subunit alpha	sec61	11.991	1103	sp|P79088|SC61A_SCHPO Protein transport protein sec61 subunit alpha OS=Schizosaccharomyces pombe (strain 972 / ATCC 24843) OX=284812 GN=sec61 PE=2 SV=1	53.253	7.9	0	0	0
P87014	Protein-S-isoprenylcysteine O-methyltransferase	mam4	13.933	1104	sp|P87014|MAM4_SCHPO Protein-S-isoprenylcysteine O-methyltransferase OS=Schizosaccharomyces pombe (strain 972 / ATCC 24843) OX=284812 GN=mam4 PE=3 SV=1	26.505	7.6	0	0	0
Q8NKC0;P87015	Probable L-asparaginase 3;Probable L-asparaginase 1	SPBPB21E7.09;SPAC186.03	2.0876	1105	sp|Q8NKC0|ASPG3_SCHPO Probable L-asparaginase 3 OS=Schizosaccharomyces pombe (strain 972 / ATCC 24843) OX=284812 GN=SPBPB21E7.09 PE=3 SV=1;sp|P87015|ASPG1_SCHPO Probable L-asparaginase 1 OS=Schizosaccharomyces pombe (strain 972 / ATCC 24843) OX=284812 GN=S	38.597	7.5	0	0	0
P87059	Mitochondrial intermembrane space import and assembly protein 40	mia40	5.7066	1110	sp|P87059|MIA40_SCHPO Mitochondrial intermembrane space import and assembly protein 40 OS=Schizosaccharomyces pombe (strain 972 / ATCC 24843) OX=284812 GN=mia40 PE=3 SV=1	34.914	4.5	0	0	0
P87110	Myo-inositol transporter 2	itr2	2.0875	1111	sp|P87110|ITR2_SCHPO Myo-inositol transporter 2 OS=Schizosaccharomyces pombe (strain 972 / ATCC 24843) OX=284812 GN=itr2 PE=2 SV=1	61.136	2.3	0	0	0
P87113	C-8 sterol isomerase erg2	erg2	3.7205	1114	sp|P87113|ERG2_SCHPO C-8 sterol isomerase erg2 OS=Schizosaccharomyces pombe (strain 972 / ATCC 24843) OX=284812 GN=erg2 PE=3 SV=1	24.671	11	0	0	0
P87118	Putative inorganic pyrophosphatase C3A12.02	SPAC3A12.02	1.5151	1116	sp|P87118|IPYR2_SCHPO Putative inorganic pyrophosphatase C3A12.02 OS=Schizosaccharomyces pombe (strain 972 / ATCC 24843) OX=284812 GN=SPAC3A12.02 PE=3 SV=1	32.898	5.6	0	0	0
P87121	Transcription initiation factor TFIID subunit 2	taf2	3.2645	1117	sp|P87121|TAF2_SCHPO Transcription initiation factor TFIID subunit 2 OS=Schizosaccharomyces pombe (strain 972 / ATCC 24843) OX=284812 GN=taf2 PE=3 SV=3	133.91	2.4	0	0	0
P87148	Protein transport protein yif1	hrf1	2.5492	1127	sp|P87148|YIF1_SCHPO Protein transport protein yif1 OS=Schizosaccharomyces pombe (strain 972 / ATCC 24843) OX=284812 GN=hrf1 PE=3 SV=1	33.044	3.1	0	0	0
P87156	Probable 20S rRNA accumulation protein 4	SPBC25H2.15	1.6743	1130	sp|P87156|TSR4_SCHPO Probable 20S rRNA accumulation protein 4 OS=Schizosaccharomyces pombe (strain 972 / ATCC 24843) OX=284812 GN=SPBC25H2.15 PE=3 SV=1	44.276	4.3	0	0	0
P87170	CTP-dependent diacylglycerol kinase 1	ptp4	4.1867	1134	sp|P87170|DGK1_SCHPO CTP-dependent diacylglycerol kinase 1 OS=Schizosaccharomyces pombe (strain 972 / ATCC 24843) OX=284812 GN=ptp4 PE=3 SV=1	24.397	7.3	0	0	0
P87178	Uncharacterized protein C3D6.13c	SPBC3D6.13c	11.111	1137	sp|P87178|YB1D_SCHPO Uncharacterized protein C3D6.13c OS=Schizosaccharomyces pombe (strain 972 / ATCC 24843) OX=284812 GN=SPBC3D6.13c PE=1 SV=1	81.236	9	0	0	0
P87230	2-methoxy-6-polyprenyl-1,4-benzoquinol methylase, mitochondrial	coq5	4.6564	1140	sp|P87230|COQ5_SCHPO 2-methoxy-6-polyprenyl-1,4-benzoquinol methylase, mitochondrial OS=Schizosaccharomyces pombe (strain 972 / ATCC 24843) OX=284812 GN=coq5 PE=3 SV=1	33.887	9.5	0	0	0
P87236	Meiotically up-regulated gene 154 protein	mug154	1.5223	1142	sp|P87236|MU154_SCHPO Meiotically up-regulated gene 154 protein OS=Schizosaccharomyces pombe (strain 972 / ATCC 24843) OX=284812 GN=mug154 PE=1 SV=1	37.137	3.8	0	0	0
P87238	CUE domain-containing protein 4, mitochondrial	SPCC4G3.13c	4.9973	1143	sp|P87238|CUE4_SCHPO CUE domain-containing protein 4, mitochondrial OS=Schizosaccharomyces pombe (strain 972 / ATCC 24843) OX=284812 GN=SPCC4G3.13c PE=1 SV=1	23.524	19.1	0	0	0
P87239	DnaJ homolog 1, mitochondrial	mdj1	5.8308	1144	sp|P87239|MDJ1_SCHPO DnaJ homolog 1, mitochondrial OS=Schizosaccharomyces pombe (strain 972 / ATCC 24843) OX=284812 GN=mdj1 PE=3 SV=1	57.188	3	0	0	0
P87316	Putative ATP synthase subunit epsilon, mitochondrial	atp15	4.0729	1149	sp|P87316|ATP5E_SCHPO Putative ATP synthase subunit epsilon, mitochondrial OS=Schizosaccharomyces pombe (strain 972 / ATCC 24843) OX=284812 GN=atp15 PE=3 SV=1	7.7406	16.4	0	0	0
Q02592	Heavy metal tolerance protein	hmt1	4.1532	1158	sp|Q02592|HMT1_SCHPO Heavy metal tolerance protein OS=Schizosaccharomyces pombe (strain 972 / ATCC 24843) OX=284812 GN=hmt1 PE=2 SV=3	93.993	1.8	0	0	0
Q03392	Proliferating cell nuclear antigen	pcn1	4.7257	1160	sp|Q03392|PCNA_SCHPO Proliferating cell nuclear antigen OS=Schizosaccharomyces pombe (strain 972 / ATCC 24843) OX=284812 GN=pcn1 PE=1 SV=1	28.969	11.2	0	0	0
Q09140	UDP-glucose:glycoprotein glucosyltransferase	gpt1	30.991	1167	sp|Q09140|UGGG_SCHPO UDP-glucose:glycoprotein glucosyltransferase OS=Schizosaccharomyces pombe (strain 972 / ATCC 24843) OX=284812 GN=gpt1 PE=1 SV=2	165.47	10.4	0	0	0
Q09154	Cytochrome b-c1 complex subunit Rieske, mitochondrial	rip1	2.9583	1168	sp|Q09154|UCRI_SCHPO Cytochrome b-c1 complex subunit Rieske, mitochondrial OS=Schizosaccharomyces pombe (strain 972 / ATCC 24843) OX=284812 GN=rip1 PE=2 SV=2	24.74	8.3	0	0	0
Q09175	Dibasic-processing endoprotease	krp1	1.8466	1172	sp|Q09175|KRP1_SCHPO Dibasic-processing endoprotease OS=Schizosaccharomyces pombe (strain 972 / ATCC 24843) OX=284812 GN=krp1 PE=1 SV=1	78.126	2.1	0	0	0
Q09669	Alcohol dehydrogenase 4	adh4	10.359	1185	sp|Q09669|ADH4_SCHPO Alcohol dehydrogenase 4 OS=Schizosaccharomyces pombe (strain 972 / ATCC 24843) OX=284812 GN=adh4 PE=2 SV=1	45.527	9.5	0	0	0
Q09681	Probable alpha-1,2-galactosyltransferase gmh2	gmh2	10.166	1190	sp|Q09681|GMH2_SCHPO Probable alpha-1,2-galactosyltransferase gmh2 OS=Schizosaccharomyces pombe (strain 972 / ATCC 24843) OX=284812 GN=gmh2 PE=3 SV=1	39.107	6.9	0	0	0
Q09698	Uncharacterized protein C2F7.07c	SPAC2F7.07c	2.7763	1198	sp|Q09698|YA27_SCHPO Uncharacterized protein C2F7.07c OS=Schizosaccharomyces pombe (strain 972 / ATCC 24843) OX=284812 GN=SPAC2F7.07c PE=4 SV=1	68.776	2.8	0	0	0
Q09724	54S ribosomal protein L11, mitochondrial	mrpl11	3.0825	1206	sp|Q09724|RM11_SCHPO 54S ribosomal protein L11, mitochondrial OS=Schizosaccharomyces pombe (strain 972 / ATCC 24843) OX=284812 GN=mrp11 PE=3 SV=1	24.306	3.2	0	0	0
Q09746	Protein BZZ1	bzz1	2.3445	1215	sp|Q09746|BZZ1_SCHPO Protein BZZ1 OS=Schizosaccharomyces pombe (strain 972 / ATCC 24843) OX=284812 GN=bzz1 PE=3 SV=1	72.216	2.5	0	0	0
Q09748	Dynamin-related protein dnm1	dnm1	9.6908	1217	sp|Q09748|DNM1_SCHPO Dynamin-related protein dnm1 OS=Schizosaccharomyces pombe (strain 972 / ATCC 24843) OX=284812 GN=dnm1 PE=3 SV=1	87.008	3.7	0	0	0
Q09750	Paired amphipathic helix protein pst1	pst1	1.5279	1218	sp|Q09750|PST1_SCHPO Paired amphipathic helix protein pst1 OS=Schizosaccharomyces pombe (strain 972 / ATCC 24843) OX=284812 GN=pst1 PE=1 SV=1	171.45	0.7	0	0	0
Q09774	ATP synthase subunit g, mitochondrial	atp20	41.918	1226	sp|Q09774|ATPN_SCHPO ATP synthase subunit g, mitochondrial OS=Schizosaccharomyces pombe (strain 972 / ATCC 24843) OX=284812 GN=atp20 PE=3 SV=1	13.64	22	0	0	0
Q09778	Tuberous sclerosis 1 protein homolog	tsc1	3.3145	1227	sp|Q09778|TSC1_SCHPO Tuberous sclerosis 1 protein homolog OS=Schizosaccharomyces pombe (strain 972 / ATCC 24843) OX=284812 GN=tsc1 PE=1 SV=1	103.43	5.1	0	0	0
Q09813	Putative transcription initiation factor TFIID 111 kDa subunit	SPAC2G11.14	2.8129	1243	sp|Q09813|T111_SCHPO Putative transcription initiation factor TFIID 111 kDa subunit OS=Schizosaccharomyces pombe (strain 972 / ATCC 24843) OX=284812 GN=SPAC2G11.14 PE=1 SV=1	111.01	2.5	0	0	0
Q09839	Uncharacterized protein C16C9.01c		2.8556	1249	sp|Q09839|YAC1_SCHPO Uncharacterized protein C16C9.01c OS=Schizosaccharomyces pombe (strain 972 / ATCC 24843) OX=284812 GN=SPAC16C9.01c PE=4 SV=1	40.05	9.1	0	0	0
Q09848	U1 snRNP-associated protein usp108	usp108	19.294	1253	sp|Q09848|US108_SCHPO U1 snRNP-associated protein usp108 OS=Schizosaccharomyces pombe (strain 972 / ATCC 24843) OX=284812 GN=usp108 PE=1 SV=2	36.487	10.4	0	0	0
Q09852	Putative inorganic phosphate transporter C23D3.12	SPAC23D3.12	4.6313	1256	sp|Q09852|YAEC_SCHPO Putative inorganic phosphate transporter C23D3.12 OS=Schizosaccharomyces pombe (strain 972 / ATCC 24843) OX=284812 GN=SPAC23D3.12 PE=1 SV=1	62.315	3.9	0	0	0
Q09857	Intracellular protein transport protein uso1	uso1	1.719	1257	sp|Q09857|USO1_SCHPO Intracellular protein transport protein uso1 OS=Schizosaccharomyces pombe (strain 972 / ATCC 24843) OX=284812 GN=uso1 PE=3 SV=3	121.57	1.4	0	0	0
Q09866	Uncharacterized WD repeat-containing protein C12G12.01c		9.0643	1260	sp|Q09866|YAG1_SCHPO Uncharacterized WD repeat-containing protein C12G12.01c OS=Schizosaccharomyces pombe (strain 972 / ATCC 24843) OX=284812 GN=SPAC12G12.01c PE=1 SV=2	101.95	2.8	0	0	0
Q09891	Putative phospholipid-transporting ATPase C24B11.12c	SPAC24B11.12c	2.6651	1266	sp|Q09891|ATCX_SCHPO Putative phospholipid-transporting ATPase C24B11.12c OS=Schizosaccharomyces pombe (strain 972 / ATCC 24843) OX=284812 GN=SPAC24B11.12c PE=3 SV=1	159.35	1.7	0	0	0
Q09895	Uncharacterized protein C24B11.08c	SPAC24B11.08c	1.9432	1270	sp|Q09895|YAI8_SCHPO Uncharacterized protein C24B11.08c OS=Schizosaccharomyces pombe (strain 972 / ATCC 24843) OX=284812 GN=SPAC24B11.08c PE=3 SV=1	43.707	2.1	0	0	0
Q09896	Probable mitochondrial pyruvate carrier 2	mpc2	6.1838	1271	sp|Q09896|MPC2_SCHPO Probable mitochondrial pyruvate carrier 2 OS=Schizosaccharomyces pombe (strain 972 / ATCC 24843) OX=284812 GN=mpc2 PE=3 SV=1	13.536	19.5	0	0	0
Q09909	Pre-mRNA-splicing factor cwf19	cwf19	3.4313	1275	sp|Q09909|CWF19_SCHPO Pre-mRNA-splicing factor cwf19 OS=Schizosaccharomyces pombe (strain 972 / ATCC 24843) OX=284812 GN=cwf19 PE=1 SV=1	74.419	2.7	0	0	0
Q09917	TRP-like ion channel pkd2	pkd2	2.0417	1283	sp|Q09917|PKD2_SCHPO TRP-like ion channel pkd2 OS=Schizosaccharomyces pombe (strain 972 / ATCC 24843) OX=284812 GN=pkd2 PE=1 SV=1	79.988	1.8	0	0	0
Q09920	Iron transport multicopper oxidase fio1	fio1	1.4643	1284	sp|Q09920|FIO1_SCHPO Iron transport multicopper oxidase fio1 OS=Schizosaccharomyces pombe (strain 972 / ATCC 24843) OX=284812 GN=fio1 PE=3 SV=1	69.907	1.4	0	0	0
Q09926	Transcription factor pcr1	pcr1	6.0592	1288	sp|Q09926|PCR1_SCHPO Transcription factor pcr1 OS=Schizosaccharomyces pombe (strain 972 / ATCC 24843) OX=284812 GN=pcr1 PE=1 SV=1	19.348	8.2	0	0	0
Q10074	Vacuolar amino acid transporter 3	avt3	4.6981	1295	sp|Q10074|AVT3_SCHPO Vacuolar amino acid transporter 3 OS=Schizosaccharomyces pombe (strain 972 / ATCC 24843) OX=284812 GN=avt3 PE=1 SV=1	73.06	6.9	0	0	0
Q10134	Iron-sensing transcription factor 1	fep1	9.5786	1308	sp|Q10134|FEP1_SCHPO Iron-sensing transcriptional repressor OS=Schizosaccharomyces pombe (strain 972 / ATCC 24843) OX=284812 GN=fep1 PE=1 SV=1	60.611	6.6	0	0	0
Q10153	CDP-diacylglycerol--inositol 3-phosphatidyltransferase	pis1	5.7402	1315	sp|Q10153|PIS_SCHPO CDP-diacylglycerol--inositol 3-phosphatidyltransferase OS=Schizosaccharomyces pombe (strain 972 / ATCC 24843) OX=284812 GN=pis1 PE=3 SV=2	26.924	7.2	0	0	0
[truncated: 163 more rows]

## Sheet: 0549_proteinGroups_RAW
Intensity 0549_1_1	Intensity 0549_2_1	Intensity 0549_3_2	Intensity 0549_4_1	iBAQ	iBAQ 0549_1_1	iBAQ 0549_2_1	iBAQ 0549_3_2	iBAQ 0549_4_1	Only identified by site	Reverse	Potential contaminant	Peptides	Razor + unique peptides	Unique peptides	Sequence coverage [%]	Unique + razor sequence coverage [%]	Unique sequence coverage [%]	Mol. weight [kDa]	Q-value	Score	Intensity	iBAQ peptides	MS/MS count	Peptide counts (all)	Peptide counts (razor+unique)	Peptide counts (unique)	Number of proteins	Peptides 0549_1_1	Peptides 0549_2_1	Peptides 0549_3_2	Peptides 0549_4_1	Razor + unique peptides 0549_1_1	Razor + unique peptides 0549_2_1	Razor + unique peptides 0549_3_2	Razor + unique peptides 0549_4_1	Unique peptides 0549_1_1	Unique peptides 0549_2_1	Unique peptides 0549_3_2	Unique peptides 0549_4_1	Sequence length	Sequence lengths	Sequence coverage 0549_1_1 [%]	Sequence coverage 0549_2_1 [%]	Sequence coverage 0549_3_2 [%]	Sequence coverage 0549_4_1 [%]	Protein IDs	Majority protein IDs	Protein names	Gene names
[truncated: 1,855 more rows]
[truncated: 13 more columns]
