# Supplementary material for: The Greatwall-Endosulfine-PP2A/B55 pathway controls entry into quiescence by promoting translation of Elongator-tuneable transcripts
Source: Research Square preprint supplement (doi:10.21203/rs.3.rs-3616701/v1), 2023-12-05
Supplement: Supplementary file 2 [file 1d05eae386a96b49d1941da3.xlsx]

## Sheet: wt_vs_cp_4_cod_up
Coding genes upregulated in ppk18∆cek1∆ compared to the wild-type in MM-N 4h.
	systematic	synonyms	baseMean	log2FoldChange	lfcSE	stat	pvalue	padj
1	SPAC977.15	SPAC977.15	861.708	7.72713	0.210526	36.704	6.31273e-295	1.10323e-292
2	SPBC9B6.02c	Tf2-9	12.1012	7.21207	1.56971	4.59453	4.33727e-06	1.01673e-05
3	SPAC750.02c	SPAC750.02c	5.28713	6.84771	1.26518	5.41243	6.21752e-08	1.7013e-07
4	SPCC191.11	inv1	5195.09	6.37374	0.289145	22.0434	1.10541e-107	4.17104e-106
5	SPBC839.06	cta3	9418.79	6.20261	0.216	28.7158	2.42494e-181	1.91714e-179
6	SPCC70.08c	SPCC70.08c	5913.72	5.86992	0.130094	45.1204	0	0
7	SPBC1348.05	SPBC1348.05	103.259	5.74261	0.414198	13.8644	1.04063e-43	1.25196e-42
8	SPAC2E1P3.03c	Tf2-3	44.0253	5.59158	0.552683	10.1172	4.63718e-24	3.05511e-23
9	SPBPB2B2.18	SPBPB2B2.18	13.7452	5.28669	1.3019	4.06076	4.89134e-05	0.000104616
10	SPAC186.06	SPAC186.06	43.0789	5.27155	0.706462	7.46191	8.52769e-14	3.45319e-13
11	SPCC1020.14	Tf2-12	4.10659	5.21737	1.28992	4.04473	5.2384e-05	0.000111644
12	SPAC27E2.08	Tf2-6	1033.33	5.17928	0.313303	16.5312	2.18621e-61	3.92396e-60
13	SPAPB15E9.03c	Tf2-5	13.6158	5.08172	0.957215	5.30885	1.10317e-07	2.9529e-07
14	SPAC9.04	Tf2-1	62.6511	5.05259	0.475282	10.6307	2.14431e-26	1.59288e-25
15	SPAC19D5.09c	Tf2-8	4813.83	4.79029	0.199929	23.9599	7.27834e-127	3.33348e-125
16	SPAC9G1.14	SPAC9G1.14	56.4602	4.76909	0.428152	11.1388	8.12206e-29	6.49863e-28
17	SPAC1B3.16c	vht1	26541.4	4.75235	0.0829261	57.3083	0	0
18	SPCC576.17c	SPCC576.17c	661.657	4.69608	0.165363	28.3986	2.10327e-177	1.6055e-175
19	SPAC977.18	SPAC977.18	15.6279	4.67036	0.786872	5.93534	2.93231e-09	8.78768e-09
20	SPBC18E5.15	SPBC18E5.15	553.979	4.66936	0.149424	31.249	2.30179e-214	2.24797e-212
21	SPAC167.08	Tf2-2	700.001	4.58125	0.179334	25.5459	6.09251e-144	3.26293e-142
22	SPAC2E1P3.02c	amt3	768.247	4.57084	0.139934	32.6642	5.03466e-234	5.76469e-232
23	SPBCPT2R1.08c	tlh2	40.5026	4.47542	0.558177	8.01791	1.07559e-15	4.80038e-15
24	SPAC21E11.04	aca1	4056.99	4.43682	0.127606	34.7696	6.99974e-265	1.03301e-262
25	SPCC1494.11c	Tf2-13	509.886	4.41714	0.203946	21.6584	5.06483e-104	1.83801e-102
26	SPAC26A3.13c	Tf2-4	219.056	4.41656	0.248278	17.7887	8.64221e-71	1.86341e-69
27	SPAC13D1.01c	Tf2-7	3355.2	4.39297	0.157979	27.8072	3.54567e-170	2.53191e-168
28	SPBPB10D8.03	SPBPB10D8.03	29.3424	4.27403	0.534996	7.9889	1.36151e-15	6.02785e-15
29	SPAC6C3.03c	SPAC6C3.03c	66.6018	4.21802	0.350929	12.0196	2.80308e-33	2.55353e-32
30	SPAC977.02	ftm2	7.03362	4.15391	0.982684	4.2271	2.36721e-05	5.21415e-05
31	SPBC1271.08c	SPBC1271.08c	2999.45	4.08323	0.101344	40.2907	0	0
32	SPAC343.21	SPAC343.21	252.323	4.05116	0.147332	27.4968	1.91878e-166	1.32735e-164
33	SPBC1289.17	Tf2-11	1360.28	3.88004	0.147703	26.2692	4.31487e-152	2.53584e-150
34	SPBC1289.14	SPBC1289.14	921.739	3.76331	0.149374	25.1939	4.67154e-140	2.33261e-138
35	SPBPB21E7.04c	SPBPB21E7.04c	1796.74	3.74614	0.227281	16.4824	4.90885e-61	8.71649e-60
36	SPAC212.11	tlh1	11.2274	3.71227	0.985878	3.76545	0.000166251	0.000335918
37	SPAC11D3.09	SPAC11D3.09	622.775	3.65966	0.127757	28.6455	1.82466e-180	1.4256e-178
38	SPBC36.01c	SPBC36.01c	452.139	3.60078	0.158523	22.7146	3.21496e-114	1.27087e-112
39	SPAC8E11.08c	SPAC8E11.08c	17.3619	3.56084	0.902353	3.94617	7.94109e-05	0.000165995
40	SPBC1E8.04	Tf2-10	392.104	3.52074	0.200122	17.593	2.78804e-69	5.78605e-68
41	SPAC1F8.02c	shu1	72.9497	3.51694	0.297339	11.828	2.7963e-32	2.45963e-31
42	SPAP8A3.07c	SPAP8A3.07c	14764.8	3.51239	0.0727731	48.265	0	0
43	SPBC19F5.04	SPBC19F5.04	8938.66	3.35914	0.0536271	62.6387	0	0
44	SPCC4B3.03c	mam301	44262.8	3.34033	0.0480721	69.4857	0	0
45	SPBPB10D8.06c	SPBPB10D8.06c	683.656	3.25312	0.160414	20.2795	1.95051e-91	5.75704e-90
46	SPAC222.08c	sno1	3102.62	3.20573	0.0791194	40.5177	0	0
47	SPBC1105.02c	lys4	15768.3	3.20484	0.0668924	47.9105	0	0
48	SPBC36.02c	SPBC36.02c	414.617	3.19971	0.291905	10.9615	5.85347e-28	4.60034e-27
49	SPBC1773.12	SPBC1773.12	3403.11	3.17668	0.0748115	42.4624	0	0
50	SPCC70.12c	ecl1	9701.23	3.16428	0.0753079	42.0179	0	0
