# Supplementary material for: The Greatwall-Endosulfine-PP2A/B55 pathway controls entry into quiescence by promoting translation of Elongator-tuneable transcripts
Source: Research Square preprint supplement (doi:10.21203/rs.3.rs-3616701/v1), 2023-12-05
Supplement: Supplementary file 3 [file 1de64ec1943d44e096079b8d.xlsx]

## Sheet: 0518_iBAQ_60min
GRADIENTE 60min							0518_4: P -N2 (Paa1-L-YFP)
Sequence coverage [%]	Protein IDs	Majority protein IDs	Protein names	Gene names	Fasta headers	Mol. weight [kDa]	Intensity 4_2_Slot1-39_1_3859	Peptides 4_2_Slot1-39_1_3859	iBAQ 4_2_Slot1-39_1_3859
85.9	Q9UT08	Q9UT08	Protein phosphatase PP2A regulatory subunit A	paa1	sp|Q9UT08|2AAA_SCHPO Protein phosphatase PP2A regulatory subunit A OS=Schizosaccharomyces pombe (strain 972 / ATCC 24843) OX=284812 GN=paa1 PE=1 SV=1	66.616	207240000	54	6476300
91.6	P23636	P23636	Major serine/threonine-protein phosphatase PP2A-2 catalytic subunit	ppa2	sp|P23636|PP2A2_SCHPO Major serine/threonine-protein phosphatase PP2A-2 catalytic subunit OS=Schizosaccharomyces pombe (strain 972 / ATCC 24843) OX=284812 GN=ppa2 PE=3 SV=1	36.489	26402000	30	1553000
83.1	P40370;Q8NKC2	P40370	Enolase 1-1	eno101	sp|P40370|ENO11_SCHPO Enolase 1-1 OS=Schizosaccharomyces pombe (strain 972 / ATCC 24843) OX=284812 GN=eno101 PE=1 SV=2	47.435	27084000	33	1504700
77	P0CT55;P0CT54	P0CT55;P0CT54			sp|P0CT55|EF1A3_SCHPO Elongation factor 1-alpha-B/C OS=Schizosaccharomyces pombe (strain 972 / ATCC 24843) OX=284812 GN=tef103 PE=1 SV=1;sp|P0CT54|EF1A2_SCHPO Elongation factor 1-alpha-B OS=Schizosaccharomyces pombe (strain 972 / ATCC 24843) OX=284812 GN=t	49.674	30217000	33	1259000
71.1	P00332	P00332	Alcohol dehydrogenase	adh1	sp|P00332|ADH_SCHPO Alcohol dehydrogenase OS=Schizosaccharomyces pombe (strain 972 / ATCC 24843) OX=284812 GN=adh1 PE=1 SV=2	37.396	18036000	19	1002000
83	P36580	P36580	Fructose-bisphosphate aldolase	fba1	sp|P36580|ALF_SCHPO Fructose-bisphosphate aldolase OS=Schizosaccharomyces pombe (strain 972 / ATCC 24843) OX=284812 GN=fba1 PE=1 SV=2	39.57	14633000	27	914560
75.6	P78958	P78958	Glyceraldehyde-3-phosphate dehydrogenase 1	tdh1	sp|P78958|G3P1_SCHPO Glyceraldehyde-3-phosphate dehydrogenase 1 OS=Schizosaccharomyces pombe (strain 972 / ATCC 24843) OX=284812 GN=tdh1 PE=1 SV=1	35.869	15943000	30	839080
69.9	P23635	P23635	Minor serine/threonine-protein phosphatase PP2A-1 catalytic subunit	ppa1	sp|P23635|PP2A1_SCHPO Minor serine/threonine-protein phosphatase PP2A-1 catalytic subunit OS=Schizosaccharomyces pombe (strain 972 / ATCC 24843) OX=284812 GN=ppa1 PE=3 SV=1	35.29	9087800	13	699060
91	P36623	P36623	Phosphoglycerate mutase	gpm1	sp|P36623|PMGY_SCHPO Phosphoglycerate mutase OS=Schizosaccharomyces pombe (strain 972 / ATCC 24843) OX=284812 GN=gpm1 PE=1 SV=1	23.765	7639100	28	587630
88.7	O60198	O60198	S-adenosylmethionine synthase	sam1	sp|O60198|METK_SCHPO S-adenosylmethionine synthase OS=Schizosaccharomyces pombe (strain 972 / ATCC 24843) OX=284812 GN=sam1 PE=1 SV=1	41.831	11962000	27	543710
89	Q10208	Q10208	Pyruvate kinase	pyk1	sp|Q10208|KPYK_SCHPO Pyruvate kinase OS=Schizosaccharomyces pombe (strain 972 / ATCC 24843) OX=284812 GN=pyk1 PE=1 SV=1	55.514	14866000	41	530940
97.6	O60101	O60101	Phosphoglycerate kinase	pgk1	sp|O60101|PGK_SCHPO Phosphoglycerate kinase OS=Schizosaccharomyces pombe (strain 972 / ATCC 24843) OX=284812 GN=pgk1 PE=1 SV=1	43.963	14044000	37	501580
42.2	Q10428	Q10428	Serine/threonine-protein phosphatase 2A 56 kDa regulatory subunit delta 1 isoform	par1	sp|Q10428|2AD1_SCHPO Serine/threonine-protein phosphatase 2A 56 kDa regulatory subunit delta 1 isoform OS=Schizosaccharomyces pombe (strain 972 / ATCC 24843) OX=284812 GN=par1 PE=1 SV=1	63.345	10726000	28	446930
60.1	Q92345	Q92345	Probable pyruvate decarboxylase C1F8.07c	SPAC1F8.07c	sp|Q92345|PDC2_SCHPO Probable pyruvate decarboxylase C1F8.07c OS=Schizosaccharomyces pombe (strain 972 / ATCC 24843) OX=284812 GN=SPAC1F8.07c PE=1 SV=3	61.719	10083000	30	403320
80.2	O74887	O74887	Peroxiredoxin tpx1	tpx1	sp|O74887|TPX1_SCHPO Peroxiredoxin tpx1 OS=Schizosaccharomyces pombe (strain 972 / ATCC 24843) OX=284812 GN=tpx1 PE=1 SV=1	21.191	4249300	16	386300
80.2	P40998	P40998	Thiamine thiazole synthase	thi2	sp|P40998|THI4_SCHPO Thiamine thiazole synthase OS=Schizosaccharomyces pombe (strain 972 / ATCC 24843) OX=284812 GN=thi2 PE=2 SV=2	35.274	6509600	20	382920
65.5	O59855	O59855	Probable heat shock protein ssa2	ssa2	sp|O59855|HSP72_SCHPO Probable heat shock protein ssa2 OS=Schizosaccharomyces pombe (strain 972 / ATCC 24843) OX=284812 GN=ssa2 PE=1 SV=3	70.232	12204000	49	358930
63.6	P18253	P18253	Peptidyl-prolyl cis-trans isomerase	ppi1	sp|P18253|CYPH_SCHPO Peptidyl-prolyl cis-trans isomerase OS=Schizosaccharomyces pombe (strain 972 / ATCC 24843) OX=284812 GN=ppi1 PE=3 SV=1	17.402	3145100	9	349460
71.1	O13972	O13972	Probable serine hydroxymethyltransferase, cytosolic	SPAC24C9.12c	sp|O13972|GLYD_SCHPO Probable serine hydroxymethyltransferase, cytosolic OS=Schizosaccharomyces pombe (strain 972 / ATCC 24843) OX=284812 GN=SPAC24C9.12c PE=3 SV=1	51.86	9176000	28	339850
41	P78759	P78759	Serine/threonine-protein phosphatase 2A 56 kDa regulatory subunit delta 2 isoform	par2	sp|P78759|2AD2_SCHPO Serine/threonine-protein phosphatase 2A 56 kDa regulatory subunit delta 2 isoform OS=Schizosaccharomyces pombe (strain 972 / ATCC 24843) OX=284812 GN=par2 PE=1 SV=2	72.464	6244500	20	283840
63.2	O14388	O14388	60S ribosomal protein L27-A	rpl27a	sp|O14388|RL27A_SCHPO 60S ribosomal protein L27-A OS=Schizosaccharomyces pombe (strain 972 / ATCC 24843) OX=284812 GN=rpl2701 PE=2 SV=2	15.389	1574700	11	262450
81.1	P78812	P78812	6-phosphogluconate dehydrogenase, decarboxylating	SPBC660.16	sp|P78812|6PGD_SCHPO 6-phosphogluconate dehydrogenase, decarboxylating OS=Schizosaccharomyces pombe (strain 972 / ATCC 24843) OX=284812 GN=SPBC660.16 PE=1 SV=2	53.679	6466900	30	239510
64.9	P41887	P41887	Heat shock protein 90 homolog	swo1	sp|P41887|HSP90_SCHPO Heat shock protein 90 homolog OS=Schizosaccharomyces pombe (strain 972 / ATCC 24843) OX=284812 GN=swo1 PE=1 SV=2	80.595	7815600	43	217100
75.5	P10989	P10989	Actin	act1	sp|P10989|ACT_SCHPO Actin OS=Schizosaccharomyces pombe (strain 972 / ATCC 24843) OX=284812 GN=act1 PE=1 SV=1	41.764	4124100	24	206210
73	O14460;O94316	O14460	Elongation factor 2	eft201	sp|O14460|EF2_SCHPO Elongation factor 2 OS=Schizosaccharomyces pombe (strain 972 / ATCC 24843) OX=284812 GN=eft201 PE=1 SV=2	93.23	9279900	45	201740
71.2	O94489	O94489	Elongation factor 3	tef3	sp|O94489|EF3_SCHPO Elongation factor 3 OS=Schizosaccharomyces pombe (strain 972 / ATCC 24843) OX=284812 GN=tef3 PE=1 SV=1	115.8	10116000	44	198360
70.8	P36597	P36597	4-amino-5-hydroxymethyl-2-methylpyrimidine phosphate synthase	nmt1	sp|P36597|NMT1_SCHPO 4-amino-5-hydroxymethyl-2-methylpyrimidine phosphate synthase OS=Schizosaccharomyces pombe (strain 972 / ATCC 24843) OX=284812 GN=nmt1 PE=2 SV=1	38.965	3928900	23	196450
51.3	O13639	O13639	Adenosylhomocysteinase		sp|O13639|SAHH_SCHPO Adenosylhomocysteinase OS=Schizosaccharomyces pombe (strain 972 / ATCC 24843) OX=284812 GN=pi047 PE=3 SV=1	47.383	3913000	21	195650
64.4	Q10284	Q10284	Heat shock protein sks2	sks2	sp|Q10284|SSB1_SCHPO Ribosome-associated molecular chaperone sks2 OS=Schizosaccharomyces pombe (strain 972 / ATCC 24843) OX=284812 GN=sks2 PE=1 SV=2	67.205	5214200	34	193120
41.9	P09627;P28876	P09627	Plasma membrane ATPase 1	pma1	sp|P09627|PMA1_SCHPO Plasma membrane ATPase 1 OS=Schizosaccharomyces pombe (strain 972 / ATCC 24843) OX=284812 GN=pma1 PE=1 SV=1	99.883	6069800	36	189680
86.6	Q9UT19	Q9UT19	Probable 5-methyltetrahydropteroyltriglutamate--homocysteine methyltransferase	met26	sp|Q9UT19|METE_SCHPO Probable 5-methyltetrahydropteroyltriglutamate--homocysteine methyltransferase OS=Schizosaccharomyces pombe (strain 972 / ATCC 24843) OX=284812 GN=met26 PE=1 SV=1	85.339	9338700	52	186770
80.9	P50519	P50519	Heat shock protein hsp9	hsp9	sp|P50519|HSP9_SCHPO Heat shock protein hsp9 OS=Schizosaccharomyces pombe (strain 972 / ATCC 24843) OX=284812 GN=hsp9 PE=2 SV=1	7.5031	919290	6	183860
41	A0A059PIR9	A0A059PIR9			tr|A0A059PIR9|A0A059PIR9_AEQVI Yellow fluorescent protein (Fragment) OS=Aequorea victoria OX=6100 GN=yfp PE=1 SV=1	28.13	1785200	13	178520
63.1	P56289;Q9UST4	P56289;Q9UST4	Eukaryotic translation initiation factor 5A-1;Eukaryotic translation initiation factor 5A-2	tif51a;tif51b	sp|P56289|IF5A1_SCHPO Eukaryotic translation initiation factor 5A-1 OS=Schizosaccharomyces pombe (strain 972 / ATCC 24843) OX=284812 GN=tif51a PE=1 SV=1;sp|Q9UST4|IF5A2_SCHPO Eukaryotic translation initiation factor 5A-2 OS=Schizosaccharomyces pombe (strai	17.152	1353000	6	169130
68	P0C8R3;P0C016;P0CH07;P0CH06;P0CG72	P0C8R3;P0C016;P0CH07;P0CH06;P0CG72	Ubiquitin-40S ribosomal protein S27b;Ubiquitin;40S ribosomal protein S27b;Ubiquitin-40S ribosomal protein S27a;Ubiquitin;40S ribosomal protein S27a;Ubiquitin-60S ribosomal protein L40;Ubiquitin;60S ribosomal protein L40;Polyubiquitin;Ubiquitin	ubi5;ubi3;ubi2;ubi1;ubi4	sp|P0C8R3|RS27B_SCHPO Ubiquitin-40S ribosomal protein S27b OS=Schizosaccharomyces pombe (strain 972 / ATCC 24843) OX=284812 GN=ubi5 PE=1 SV=2;sp|P0C016|RS27A_SCHPO Ubiquitin-40S ribosomal protein S27a OS=Schizosaccharomyces pombe (strain 972 / ATCC 24843)	17.215	1161000	8	165850
97.2	P07669	P07669	Triosephosphate isomerase	tpi1	sp|P07669|TPIS_SCHPO Triosephosphate isomerase OS=Schizosaccharomyces pombe (strain 972 / ATCC 24843) OX=284812 GN=tpi1 PE=1 SV=4	27.227	2558500	16	159910
66.4	P0CT74;P0CT73	P0CT74;P0CT73			sp|P0CT74|RS11B_SCHPO 40S ribosomal protein S11-B OS=Schizosaccharomyces pombe (strain 972 / ATCC 24843) OX=284812 GN=rps1102 PE=3 SV=1;sp|P0CT73|RS11A_SCHPO 40S ribosomal protein S11-A OS=Schizosaccharomyces pombe (strain 972 / ATCC 24843) OX=284812 GN=rp	17.5	1325600	12	147290
73	P78827	P78827	Probable ketol-acid reductoisomerase, mitochondrial	ilv5	sp|P78827|ILV5_SCHPO Probable ketol-acid reductoisomerase, mitochondrial OS=Schizosaccharomyces pombe (strain 972 / ATCC 24843) OX=284812 GN=ilv5 PE=1 SV=2	45.188	3034800	23	144510
49.4	O74330	O74330	40S ribosomal protein S27	rps27	sp|O74330|RS27_SCHPO 40S ribosomal protein S27 OS=Schizosaccharomyces pombe (strain 972 / ATCC 24843) OX=284812 GN=rps27 PE=3 SV=1	9.1718	568500	2	142130
56.9	Q9C0Z7	Q9C0Z7	40S ribosomal protein S6-B	rps6b	sp|Q9C0Z7|RS6B_SCHPO 40S ribosomal protein S6-B OS=Schizosaccharomyces pombe (strain 972 / ATCC 24843) OX=284812 GN=rps602 PE=1 SV=1	27.475	1196800	10	132970
2.2	O13839	O13839	G2-specific protein kinase fin1	fin1	sp|O13839|FIN1_SCHPO G2-specific protein kinase fin1 OS=Schizosaccharomyces pombe (strain 972 / ATCC 24843) OX=284812 GN=fin1 PE=3 SV=1	82.688	5345800	1	130380
75.6	P0CT69;P0CT68	P0CT69;P0CT68			sp|P0CT69|RL20B_SCHPO 60S ribosomal protein L20-B OS=Schizosaccharomyces pombe (strain 972 / ATCC 24843) OX=284812 GN=rpl2002 PE=1 SV=1;sp|P0CT68|RL20A_SCHPO 60S ribosomal protein L20-A OS=Schizosaccharomyces pombe (strain 972 / ATCC 24843) OX=284812 GN=rp	20.599	1167700	12	129750
74.3	O14027	O14027	Probable pyridoxal 5-phosphate synthase subunit PDX1	snz1	sp|O14027|PDX1_SCHPO Probable pyridoxal 5-phosphate synthase subunit PDX1 OS=Schizosaccharomyces pombe (strain 972 / ATCC 24843) OX=284812 GN=snz1 PE=1 SV=1	31.403	2091700	14	123040
67.8	P40372;P36584	P40372;P36584	60S ribosomal protein L3-A;60S ribosomal protein L3-B	rpl3a;rpl3b	sp|P40372|RL3A_SCHPO 60S ribosomal protein L3-A OS=Schizosaccharomyces pombe (strain 972 / ATCC 24843) OX=284812 GN=rpl301 PE=1 SV=2;sp|P36584|RL3B_SCHPO 60S ribosomal protein L3-B OS=Schizosaccharomyces pombe (strain 972 / ATCC 24843) OX=284812 GN=rpl302	43.802	2541000	25	121000
38.6	O74172;P79009	O74172;P79009	40S ribosomal protein S25-B;40S ribosomal protein S25-A	rps25b;rps25a	sp|O74172|RS25B_SCHPO 40S ribosomal protein S25-B OS=Schizosaccharomyces pombe (strain 972 / ATCC 24843) OX=284812 GN=rps2501 PE=3 SV=1;sp|P79009|RS25A_SCHPO 40S ribosomal protein S25-A OS=Schizosaccharomyces pombe (strain 972 / ATCC 24843) OX=284812 GN=rp	9.8194	361410	4	120470
53.3	Q12702	Q12702	Protein phosphatase PP2A regulatory subunit B	pab1	sp|Q12702|2ABA_SCHPO Protein phosphatase PP2A regulatory subunit B OS=Schizosaccharomyces pombe (strain 972 / ATCC 24843) OX=284812 GN=pab1 PE=1 SV=2	52.795	2750300	17	119580
60.4	O14069	O14069	Probable 60S ribosomal protein L28e	rpl28e	sp|O14069|RL28E_SCHPO Probable 60S ribosomal protein L28e OS=Schizosaccharomyces pombe (strain 972 / ATCC 24843) OX=284812 GN=rpl44 PE=1 SV=1	14.755	955020	8	119380
37.3	O42914	O42914	Uncharacterized protein C16A3.08c	SPBC16A3.08c	sp|O42914|YBI8_SCHPO Uncharacterized protein C16A3.08c OS=Schizosaccharomyces pombe (strain 972 / ATCC 24843) OX=284812 GN=SPBC16A3.08c PE=1 SV=1	30.949	1253000	13	113910
43.7	P78946	P78946	60S ribosomal protein L26	rpl26	sp|P78946|RL26_SCHPO 60S ribosomal protein L26 OS=Schizosaccharomyces pombe (strain 972 / ATCC 24843) OX=284812 GN=rpl26 PE=3 SV=1	14.341	560550	7	112110
46	P79058	P79058	mRNA stability protein mug134	mug134	sp|P79058|IGO1_SCHPO mRNA stability protein mug134 OS=Schizosaccharomyces pombe (strain 972 / ATCC 24843) OX=284812 GN=mug134 PE=2 SV=4	15.441	1008700	6	112080
69.1	O13672	O13672	60S ribosomal protein L8	rpl8	sp|O13672|RL8_SCHPO 60S ribosomal protein L8 OS=Schizosaccharomyces pombe (strain 972 / ATCC 24843) OX=284812 GN=rpl8 PE=1 SV=3	28.606	1903600	13	111980
91.3	O14463	O14463	Thioredoxin-1	trx1	sp|O14463|TRX1_SCHPO Thioredoxin-1 OS=Schizosaccharomyces pombe (strain 972 / ATCC 24843) OX=284812 GN=trx1 PE=3 SV=3	11.297	666460	8	111080
55.9	P0CT76;P0CT75	P0CT76;P0CT75			sp|P0CT76|RS23B_SCHPO 40S ribosomal protein S23-B OS=Schizosaccharomyces pombe (strain 972 / ATCC 24843) OX=284812 GN=rps2302 PE=1 SV=1;sp|P0CT75|RS23A_SCHPO 40S ribosomal protein S23-A OS=Schizosaccharomyces pombe (strain 972 / ATCC 24843) OX=284812 GN=rp	15.655	886470	5	110810
67.3	P47943;Q10055	P47943	ATP-dependent RNA helicase eIF4A	tif1	sp|P47943|IF4A_SCHPO ATP-dependent RNA helicase eIF4A OS=Schizosaccharomyces pombe (strain 972 / ATCC 24843) OX=284812 GN=tif1 PE=1 SV=2	44.436	2414700	17	109760
39	O74893	O74893	40S ribosomal protein S20	rps20	sp|O74893|RS20_SCHPO 40S ribosomal protein S20 OS=Schizosaccharomyces pombe (strain 972 / ATCC 24843) OX=284812 GN=rps20 PE=1 SV=1	13.544	656920	5	109490
64.2	O94238	O94238	60S ribosomal protein L14	rpl14	sp|O94238|RL14_SCHPO 60S ribosomal protein L14 OS=Schizosaccharomyces pombe (strain 972 / ATCC 24843) OX=284812 GN=rpl14 PE=2 SV=1	15.21	744440	9	106350
47	Q9P7B2;O14049	Q9P7B2;O14049	40S ribosomal protein S8-B;40S ribosomal protein S8-A	rps8b;rps8a	sp|Q9P7B2|RS8B_SCHPO 40S ribosomal protein S8-B OS=Schizosaccharomyces pombe (strain 972 / ATCC 24843) OX=284812 GN=rps802 PE=1 SV=1;sp|O14049|RS8A_SCHPO 40S ribosomal protein S8-A OS=Schizosaccharomyces pombe (strain 972 / ATCC 24843) OX=284812 GN=rps801	22.564	800040	8	100000
60.5	Q10101	Q10101	40S ribosomal protein S7	rps7	sp|Q10101|RS7_SCHPO 40S ribosomal protein S7 OS=Schizosaccharomyces pombe (strain 972 / ATCC 24843) OX=284812 GN=rps7 PE=1 SV=2	21.947	898070	10	99785
51.1	Q10330	Q10330	60S ribosomal protein L25-A	rpl25a	sp|Q10330|RL25A_SCHPO 60S ribosomal protein L25-A OS=Schizosaccharomyces pombe (strain 972 / ATCC 24843) OX=284812 GN=rpl2501 PE=1 SV=1	15.835	472220	7	94445
65.7	Q9URM2	Q9URM2	Probable transketolase	SPBC2G5.05	sp|Q9URM2|TKT_SCHPO Probable transketolase OS=Schizosaccharomyces pombe (strain 972 / ATCC 24843) OX=284812 GN=SPBC2G5.05 PE=2 SV=1	75.181	3272400	22	93498
57.2	O14062	O14062	40S ribosomal protein S12-A	rps12a	sp|O14062|RS12A_SCHPO 40S ribosomal protein S12-A OS=Schizosaccharomyces pombe (strain 972 / ATCC 24843) OX=284812 GN=rps1201 PE=3 SV=1	15.616	558720	7	93120
67	P21696	P21696	Glycerol-3-phosphate dehydrogenase [NAD(+)] 1	gpd1	sp|P21696|GPD1_SCHPO Glycerol-3-phosphate dehydrogenase [NAD(+)] 1 OS=Schizosaccharomyces pombe (strain 972 / ATCC 24843) OX=284812 GN=gpd1 PE=1 SV=2	41.995	2354700	18	90567
58.5	P42656	P42656	DNA damage checkpoint protein rad24	rad24	sp|P42656|RAD24_SCHPO Checkpoint signal transducer rad24 OS=Schizosaccharomyces pombe (strain 972 / ATCC 24843) OX=284812 GN=rad24 PE=1 SV=2	30.082	1340600	15	89370
48.2	O74892	O74892	40S ribosomal protein S2	rps2	sp|O74892|RS2_SCHPO 40S ribosomal protein S2 OS=Schizosaccharomyces pombe (strain 972 / ATCC 24843) OX=284812 GN=rps2 PE=1 SV=1	27.637	1423700	8	88982
84.7	Q10281	Q10281	Guanine nucleotide-binding protein subunit beta-like protein	rkp1	sp|Q10281|GBLP_SCHPO Guanine nucleotide-binding protein subunit beta-like protein OS=Schizosaccharomyces pombe (strain 972 / ATCC 24843) OX=284812 GN=rkp1 PE=1 SV=3	34.851	1595500	20	88640
51.5	Q9P7G9	Q9P7G9	Adenylyl-sulfate kinase	met14	sp|Q9P7G9|KAPS_SCHPO Adenylyl-sulfate kinase OS=Schizosaccharomyces pombe (strain 972 / ATCC 24843) OX=284812 GN=met14 PE=3 SV=1	22.669	702110	8	87763
78.5	P0CT59;P0CT58	P0CT59;P0CT58			sp|P0CT59|RS22B_SCHPO 40S ribosomal protein S22-B OS=Schizosaccharomyces pombe (strain 972 / ATCC 24843) OX=284812 GN=rps2202 PE=3 SV=1;sp|P0CT58|RS22A_SCHPO 40S ribosomal protein S22-A OS=Schizosaccharomyces pombe (strain 972 / ATCC 24843) OX=284812 GN=rp	14.76	700700	9	87587
92.9	O14313	O14313	Putative peroxiredoxin pmp20	pmp20	sp|O14313|PMP20_SCHPO Peroxisomal membrane associated protein 20 OS=Schizosaccharomyces pombe (strain 972 / ATCC 24843) OX=284812 GN=pmp20 PE=1 SV=2	16.675	773870	9	85986
61	O14293	O14293	Putative aldehyde dehydrogenase-like protein C9E9.09c	SPAC9E9.09c	sp|O14293|YF19_SCHPO Putative aldehyde dehydrogenase-like protein C9E9.09c OS=Schizosaccharomyces pombe (strain 972 / ATCC 24843) OX=284812 GN=SPAC9E9.09c PE=1 SV=1	54.768	2285500	19	84647
10.9	O60156	O60156	Probable tRNA-splicing endonuclease subunit sen34	sen34	sp|O60156|SEN34_SCHPO Probable tRNA-splicing endonuclease subunit sen34 OS=Schizosaccharomyces pombe (strain 972 / ATCC 24843) OX=284812 GN=sen34 PE=3 SV=1	32.807	1509900	1	83885
63.6	O59794	O59794	60S ribosomal protein L17-B	rpl17b	sp|O59794|RL17B_SCHPO 60S ribosomal protein L17-B OS=Schizosaccharomyces pombe (strain 972 / ATCC 24843) OX=284812 GN=rpl1702 PE=3 SV=1	20.827	827150	11	82715
69.5	P87228	P87228	Putative D-3-phosphoglycerate dehydrogenase		sp|P87228|SERA_SCHPO Putative D-3-phosphoglycerate dehydrogenase OS=Schizosaccharomyces pombe (strain 972 / ATCC 24843) OX=284812 GN=SPCC364.07 PE=1 SV=1	50.882	2099400	20	80745
60.3	O94438	O94438	40S ribosomal protein S1-B	rps102	sp|O94438|RS3A2_SCHPO 40S ribosomal protein S1-B OS=Schizosaccharomyces pombe (strain 972 / ATCC 24843) OX=284812 GN=rps102 PE=1 SV=3	28.521	1188100	16	74258
52.8	O74173	O74173	Elongation factor 1-beta	tef5	sp|O74173|EF1B_SCHPO Elongation factor 1-beta OS=Schizosaccharomyces pombe (strain 972 / ATCC 24843) OX=284812 GN=tef5 PE=2 SV=1	23.484	812430	10	73857
60.6	Q9P784	Q9P784	60S ribosomal protein L4-B	rpl4b	sp|Q9P784|RL4B_SCHPO 60S ribosomal protein L4-B OS=Schizosaccharomyces pombe (strain 972 / ATCC 24843) OX=284812 GN=rpl401 PE=3 SV=1	39.91	1250800	19	73574
56.7	O59711	O59711	Saccharopine dehydrogenase [NADP(+), L-glutamate-forming]	lys9	sp|O59711|LYS9_SCHPO Saccharopine dehydrogenase [NADP(+), L-glutamate-forming] OS=Schizosaccharomyces pombe (strain 972 / ATCC 24843) OX=284812 GN=lys9 PE=3 SV=1	49.938	1675900	15	69828
67.1	Q9UQW6	Q9UQW6	Acetyl-CoA acetyltransferase	erg10	sp|Q9UQW6|THIL_SCHPO Acetyl-CoA acetyltransferase OS=Schizosaccharomyces pombe (strain 972 / ATCC 24843) OX=284812 GN=erg10 PE=2 SV=1	40.997	1452100	18	69145
52.7	P50521	P50521	Hexokinase-2	hxk2	sp|P50521|HXK2_SCHPO Hexokinase-2 OS=Schizosaccharomyces pombe (strain 972 / ATCC 24843) OX=284812 GN=hxk2 PE=1 SV=1	50.92	1360900	18	68045
61.2	Q9Y823	Q9Y823	Homocitrate synthase, mitochondrial	lys4	sp|Q9Y823|HOSM_SCHPO Homocitrate synthase, mitochondrial OS=Schizosaccharomyces pombe (strain 972 / ATCC 24843) OX=284812 GN=lys4 PE=1 SV=1	46.292	1480900	17	67313
45.3	P0CT57;P0CT56	P0CT57;P0CT56			sp|P0CT57|RS14B_SCHPO 40S ribosomal protein S14-B OS=Schizosaccharomyces pombe (strain 972 / ATCC 24843) OX=284812 GN=rps1402 PE=3 SV=1;sp|P0CT56|RS14A_SCHPO 40S ribosomal protein S14-A OS=Schizosaccharomyces pombe (strain 972 / ATCC 24843) OX=284812 GN=rp	14.699	471180	7	67312
55.1	P78753	P78753	Probable asparagine synthetase [glutamine-hydrolyzing]	asn1	sp|P78753|ASNS_SCHPO Probable asparagine synthetase [glutamine-hydrolyzing] OS=Schizosaccharomyces pombe (strain 972 / ATCC 24843) OX=284812 GN=asn1 PE=1 SV=3	63.24	2163300	23	65554
59.9	P0CT67;P0CT66	P0CT67;P0CT66			sp|P0CT67|RS18B_SCHPO 40S ribosomal protein S18-B OS=Schizosaccharomyces pombe (strain 972 / ATCC 24843) OX=284812 GN=rps1802 PE=3 SV=1;sp|P0CT66|RS18A_SCHPO 40S ribosomal protein S18-A OS=Schizosaccharomyces pombe (strain 972 / ATCC 24843) OX=284812 GN=rp	17.435	588650	7	65406
52.4	O59838	O59838	Heat shock protein homolog pss1	pss1	sp|O59838|HSP7F_SCHPO Heat shock protein homolog pss1 OS=Schizosaccharomyces pombe (strain 972 / ATCC 24843) OX=284812 GN=pss1 PE=1 SV=2	80.374	2679300	32	65348
52.9	P0CT78;P0CT77	P0CT78;P0CT77			sp|P0CT78|RL11B_SCHPO 60S ribosomal protein L11-B OS=Schizosaccharomyces pombe (strain 972 / ATCC 24843) OX=284812 GN=rpl1102 PE=2 SV=1;sp|P0CT77|RL11A_SCHPO 60S ribosomal protein L11-A OS=Schizosaccharomyces pombe (strain 972 / ATCC 24843) OX=284812 GN=rp	19.891	519180	7	64897
55	O42938	O42938	ATP-dependent 6-phosphofructokinase	pfk1	sp|O42938|PFKA_SCHPO ATP-dependent 6-phosphofructokinase OS=Schizosaccharomyces pombe (strain 972 / ATCC 24843) OX=284812 GN=pfk1 PE=1 SV=1	102.55	2954700	35	64233
58.9	P36579	P36579	ADP-ribosylation factor 1	arf1	sp|P36579|ARF1_SCHPO ADP-ribosylation factor 1 OS=Schizosaccharomyces pombe (strain 972 / ATCC 24843) OX=284812 GN=arf1 PE=2 SV=2	20.618	763830	6	63652
62.7	Q02088	Q02088	Tropomyosin	cdc8	sp|Q02088|TPM_SCHPO Tropomyosin OS=Schizosaccharomyces pombe (strain 972 / ATCC 24843) OX=284812 GN=cdc8 PE=3 SV=1	18.964	631660	8	63166
33.1	O42935;P79015	O42935;P79015	60S ribosomal protein L32-B;60S ribosomal protein L32-A	rpl32b;rpl32a	sp|O42935|RL32B_SCHPO 60S ribosomal protein L32-B OS=Schizosaccharomyces pombe (strain 972 / ATCC 24843) OX=284812 GN=rpl3201 PE=3 SV=1;sp|P79015|RL32A_SCHPO 60S ribosomal protein L32-A OS=Schizosaccharomyces pombe (strain 972 / ATCC 24843) OX=284812 GN=rp	14.445	567980	4	63109
47.5	Q92365;O94658	Q92365;O94658	60S ribosomal protein L36-A;60S ribosomal protein L36-B	rpl36a;rpl36b	sp|Q92365|RL36A_SCHPO 60S ribosomal protein L36-A OS=Schizosaccharomyces pombe (strain 972 / ATCC 24843) OX=284812 GN=rpl3601 PE=3 SV=2;sp|O94658|RL36B_SCHPO 60S ribosomal protein L36-B OS=Schizosaccharomyces pombe (strain 972 / ATCC 24843) OX=284812 GN=rp	11.263	188000	4	62666
41.5	P05734	P05734	60S ribosomal protein L19-A	rpl19a	sp|P05734|RL19A_SCHPO 60S ribosomal protein L19-A OS=Schizosaccharomyces pombe (strain 972 / ATCC 24843) OX=284812 GN=rpl1901 PE=1 SV=3	22.723	499550	12	62444
58.4	Q9P769	Q9P769	60S ribosomal protein L10-B	rpl10b	sp|Q9P769|RL10B_SCHPO 60S ribosomal protein L10-B OS=Schizosaccharomyces pombe (strain 972 / ATCC 24843) OX=284812 GN=rpl1002 PE=3 SV=1	25.359	558800	11	62089
81.7	O74928	O74928	Bifunctional purine biosynthesis protein ade10;Phosphoribosylaminoimidazolecarboxamide formyltransferase;IMP cyclohydrolase	ade10	sp|O74928|PUR9_SCHPO Bifunctional purine biosynthesis protein ade10 OS=Schizosaccharomyces pombe (strain 972 / ATCC 24843) OX=284812 GN=ade10 PE=2 SV=1	64.123	2116400	30	60467
45.6	O13614	O13614	40S ribosomal protein S10-B	rps10b	sp|O13614|RS10B_SCHPO 40S ribosomal protein S10-B OS=Schizosaccharomyces pombe (strain 972 / ATCC 24843) OX=284812 GN=rps1002 PE=3 SV=1	16.443	422390	4	60342
64.6	O59675	O59675	40S ribosomal protein S9-B	rps9b	sp|O59675|RS9B_SCHPO 40S ribosomal protein S9-B OS=Schizosaccharomyces pombe (strain 972 / ATCC 24843) OX=284812 GN=rps902 PE=1 SV=3	22.245	658640	9	59876
71.5	Q09864	Q09864	Heat shock protein 60, mitochondrial	hsp60	sp|Q09864|HSP60_SCHPO Heat shock protein 60, mitochondrial OS=Schizosaccharomyces pombe (strain 972 / ATCC 24843) OX=284812 GN=hsp60 PE=1 SV=1	62.167	2187100	31	59110
61.9	P40375;Q9P3E3	P40375	NAD-dependent malic enzyme	mae2	sp|P40375|MAOX_SCHPO NAD-dependent malic enzyme OS=Schizosaccharomyces pombe (strain 972 / ATCC 24843) OX=284812 GN=mae2 PE=1 SV=1	62.534	1759700	22	58658
45.7	Q9UT09	Q9UT09	Phospho-2-dehydro-3-deoxyheptonate aldolase, tyrosine-inhibited	aro4	sp|Q9UT09|AROG_SCHPO Phospho-2-dehydro-3-deoxyheptonate aldolase, tyrosine-inhibited OS=Schizosaccharomyces pombe (strain 972 / ATCC 24843) OX=284812 GN=aro4 PE=3 SV=1	40.638	1043600	15	57977
49.3	O59865	O59865	40S ribosomal protein S24-B	rps24b	sp|O59865|RS24B_SCHPO 40S ribosomal protein S24-B OS=Schizosaccharomyces pombe (strain 972 / ATCC 24843) OX=284812 GN=rps2402 PE=2 SV=3	15.539	340700	7	56784
86	P87216	P87216	Protein vip1	vip1	sp|P87216|VIPI_SCHPO Protein vip1 OS=Schizosaccharomyces pombe (strain 972 / ATCC 24843) OX=284812 GN=vip1 PE=1 SV=1	27.459	964410	17	56730
51.3	O13326	O13326	O-acetylhomoserine (thiol)-lyase	SPBC428.11	sp|O13326|CYSD_SCHPO Homocysteine synthase OS=Schizosaccharomyces pombe (strain 972 / ATCC 24843) OX=284812 GN=met17 PE=1 SV=1	46.408	1188600	11	56599
77.9	P19117	P19117	Inorganic pyrophosphatase	ppa1	sp|P19117|IPYR_SCHPO Inorganic pyrophosphatase OS=Schizosaccharomyces pombe (strain 972 / ATCC 24843) OX=284812 GN=ppa1 PE=3 SV=2	32.467	952800	15	56047
67.7	O60143	O60143	60S ribosomal protein L7-C	rpl7c	sp|O60143|RL7C_SCHPO 60S ribosomal protein L7-C OS=Schizosaccharomyces pombe (strain 972 / ATCC 24843) OX=284812 GN=rpl701 PE=1 SV=1	28.73	776670	16	55477
42.9	Q09826	Q09826	Protein sds23/moc1	sds23	sp|Q09826|SDS23_SCHPO Protein sds23/moc1 OS=Schizosaccharomyces pombe (strain 972 / ATCC 24843) OX=284812 GN=sds23 PE=1 SV=1	44.288	1186300	12	53925
32.4	P28748	P28748	GTP-binding nuclear protein spi1	spi1	sp|P28748|SPI1_SCHPO GTP-binding nuclear protein spi1 OS=Schizosaccharomyces pombe (strain 972 / ATCC 24843) OX=284812 GN=spi1 PE=1 SV=1	24.555	469380	6	52153
48.1	Q9P546	Q9P546	40S ribosomal protein S0-B	rps0b	sp|Q9P546|RSSA2_SCHPO 40S ribosomal protein S0-B OS=Schizosaccharomyces pombe (strain 972 / ATCC 24843) OX=284812 GN=rps002 PE=1 SV=1	31.42	671970	8	51690
59.2	P78937	P78937	Sulfate adenylyltransferase	sua1	sp|P78937|MET3_SCHPO Sulfate adenylyltransferase OS=Schizosaccharomyces pombe (strain 972 / ATCC 24843) OX=284812 GN=sua1 PE=1 SV=2	54.754	1470900	23	50719
48.6	O74836	O74836	60S ribosomal protein L1-B	rpl1b	sp|O74836|RL1B_SCHPO 60S ribosomal protein L1-B OS=Schizosaccharomyces pombe (strain 972 / ATCC 24843) OX=284812 GN=rpl101 PE=1 SV=1	23.917	456390	4	50710
28.2	Q92354;O74884	Q92354;O74884	60S ribosomal protein L24-A;60S ribosomal protein L24-B	rpl24a;rpl24b	sp|Q92354|RL24A_SCHPO 60S ribosomal protein L24-A OS=Schizosaccharomyces pombe (strain 972 / ATCC 24843) OX=284812 GN=rpl2401 PE=3 SV=1;sp|O74884|RL24B_SCHPO 60S ribosomal protein L24-B OS=Schizosaccharomyces pombe (strain 972 / ATCC 24843) OX=284812 GN=rp	16.836	402940	5	50367
55.4	O60128	O60128	40S ribosomal protein S3	rps3	sp|O60128|RS3_SCHPO 40S ribosomal protein S3 OS=Schizosaccharomyces pombe (strain 972 / ATCC 24843) OX=284812 GN=rps3 PE=1 SV=1	27.553	853540	12	50208
51.8	O74329	O74329	40S ribosomal protein S29	rps29	sp|O74329|RS29_SCHPO 40S ribosomal protein S29 OS=Schizosaccharomyces pombe (strain 972 / ATCC 24843) OX=284812 GN=rps29 PE=3 SV=3	6.6575	199710	2	49928
61.5	Q9UTJ2	Q9UTJ2	Phosphomannomutase	pmm1	sp|Q9UTJ2|PMM_SCHPO Phosphomannomutase OS=Schizosaccharomyces pombe (strain 972 / ATCC 24843) OX=284812 GN=pmm1 PE=2 SV=1	29.223	768470	14	48029
61.5	O74175	O74175	60S ribosomal protein L13	rpl13	sp|O74175|RL13_SCHPO 60S ribosomal protein L13 OS=Schizosaccharomyces pombe (strain 972 / ATCC 24843) OX=284812 GN=rpl13 PE=1 SV=1	23.529	479350	10	47935
49.6	P0CT61;P0CT60	P0CT61;P0CT60			sp|P0CT61|RL23B_SCHPO 60S ribosomal protein L23-B OS=Schizosaccharomyces pombe (strain 972 / ATCC 24843) OX=284812 GN=rpl2302 PE=3 SV=1;sp|P0CT60|RL23A_SCHPO 60S ribosomal protein L23-A OS=Schizosaccharomyces pombe (strain 972 / ATCC 24843) OX=284812 GN=rp	14.882	431180	6	47909
39	Q8TFH1	Q8TFH1	60S ribosomal protein L18-B	rpl18b	sp|Q8TFH1|RL18B_SCHPO 60S ribosomal protein L18-B OS=Schizosaccharomyces pombe (strain 972 / ATCC 24843) OX=284812 GN=rpl1802 PE=1 SV=1	21.184	473010	6	47301
55.3	P78811	P78811	Probable UTP--glucose-1-phosphate uridylyltransferase	fuy1	sp|P78811|UGPA1_SCHPO Probable UTP--glucose-1-phosphate uridylyltransferase OS=Schizosaccharomyces pombe (strain 972 / ATCC 24843) OX=284812 GN=fyu1 PE=1 SV=2	56.429	1111000	16	46292
53.2	Q9URT8;O42846	Q9URT8;O42846	60S ribosomal protein L34-B;60S ribosomal protein L34-A	rpl34b;rpl34a	sp|Q9URT8|RL34B_SCHPO 60S ribosomal protein L34-B OS=Schizosaccharomyces pombe (strain 972 / ATCC 24843) OX=284812 GN=rpl3402 PE=1 SV=1;sp|O42846|RL34A_SCHPO 60S ribosomal protein L34-A OS=Schizosaccharomyces pombe (strain 972 / ATCC 24843) OX=284812 GN=rp	12.8	182450	4	45613
71.5	P78929	P78929	Cofilin	cof1	sp|P78929|COFI_SCHPO Cofilin OS=Schizosaccharomyces pombe (strain 972 / ATCC 24843) OX=284812 GN=cof1 PE=1 SV=1	15.62	364180	9	45522
40.3	O74752	O74752	Mitochondrial protein import protein mas5	mas5	sp|O74752|MAS5_SCHPO Mitochondrial protein import protein mas5 OS=Schizosaccharomyces pombe (strain 972 / ATCC 24843) OX=284812 GN=mas5 PE=3 SV=1	44.821	770730	10	45337
67.3	Q9UTA6	Q9UTA6	Uncharacterized hydrolase C25B8.12c	SPAC25B8.12c	sp|Q9UTA6|YL8C_SCHPO Uncharacterized hydrolase C25B8.12c OS=Schizosaccharomyces pombe (strain 972 / ATCC 24843) OX=284812 GN=SPAC25B8.12c PE=1 SV=1	33.85	699590	10	43724
49.5	Q01475	Q01475	Small COPII coat GTPase sar1	sar1	sp|Q01475|SAR1_SCHPO Small COPII coat GTPase sar1 OS=Schizosaccharomyces pombe (strain 972 / ATCC 24843) OX=284812 GN=sar1 PE=1 SV=1	21.28	522110	6	43509
29.4	O42848;O42991;O43004	O42848;O42991	60S ribosomal protein L16-A;60S ribosomal protein L16-B	rpl16a;rpl16b	sp|O42848|RL16A_SCHPO 60S ribosomal protein L16-A OS=Schizosaccharomyces pombe (strain 972 / ATCC 24843) OX=284812 GN=rpl1602 PE=1 SV=1;sp|O42991|RL16B_SCHPO 60S ribosomal protein L16-B OS=Schizosaccharomyces pombe (strain 972 / ATCC 24843) OX=284812 GN=rp	22.005	433170	4	43317
58.1	O94391	O94391	Probable cytochrome b5 1	SPBC29A10.16c	sp|O94391|CYB51_SCHPO Probable cytochrome b5 1 OS=Schizosaccharomyces pombe (strain 972 / ATCC 24843) OX=284812 GN=SPBC29A10.16c PE=3 SV=1	13.91	215960	3	43193
48.2	O13907	O13907	Probable ATP-citrate synthase subunit 2	SPAC22A12.16	sp|O13907|ACL2_SCHPO Probable ATP-citrate synthase subunit 2 OS=Schizosaccharomyces pombe (strain 972 / ATCC 24843) OX=284812 GN=SPAC22A12.16 PE=1 SV=1	53.942	851260	16	42563
61.9	Q9URX6	Q9URX6	60S ribosomal protein L31	rpl31	sp|Q9URX6|RL31_SCHPO 60S ribosomal protein L31 OS=Schizosaccharomyces pombe (strain 972 / ATCC 24843) OX=284812 GN=rpl31 PE=3 SV=1	13.261	296470	7	42353
40.3	O74895	O74895	60S ribosomal protein L15-A	rpl15a	sp|O74895|RL15A_SCHPO 60S ribosomal protein L15-A OS=Schizosaccharomyces pombe (strain 972 / ATCC 24843) OX=284812 GN=rpl15 PE=3 SV=1	23.806	465260	6	42297
42	O42984	O42984	40S ribosomal protein S17-A	rps17a	sp|O42984|RS17A_SCHPO 40S ribosomal protein S17-A OS=Schizosaccharomyces pombe (strain 972 / ATCC 24843) OX=284812 GN=rps1701 PE=3 SV=1	15.514	290150	5	41450
54.6	Q09179	Q09179	Glutamine synthetase	gln1	sp|Q09179|GLNA_SCHPO Glutamine synthetase OS=Schizosaccharomyces pombe (strain 972 / ATCC 24843) OX=284812 GN=gln1 PE=1 SV=2	40.018	784390	11	41284
58.6	O74766	O74766	Probable delta-1-pyrroline-5-carboxylate dehydrogenase	SPBC24C6.04	sp|O74766|PUT2_SCHPO Probable delta-1-pyrroline-5-carboxylate dehydrogenase OS=Schizosaccharomyces pombe (strain 972 / ATCC 24843) OX=284812 GN=SPBC24C6.04 PE=1 SV=1	60.218	1108800	16	41067
64.1	Q9USW5	Q9USW5	40S ribosomal protein S4-B	rps4b	sp|Q9USW5|RS4B_SCHPO 40S ribosomal protein S4-B OS=Schizosaccharomyces pombe (strain 972 / ATCC 24843) OX=284812 GN=rps402 PE=1 SV=1	29.658	655510	13	40969
65.6	P78804	P78804	NADP-specific glutamate dehydrogenase	gdh1	sp|P78804|DHE4_SCHPO NADP-specific glutamate dehydrogenase OS=Schizosaccharomyces pombe (strain 972 / ATCC 24843) OX=284812 GN=gdh1 PE=1 SV=2	48.789	1064600	17	40945
33.7	O14230	O14230	Farnesyl pyrophosphate synthase	fps1	sp|O14230|FPPS_SCHPO Farnesyl pyrophosphate synthase OS=Schizosaccharomyces pombe (strain 972 / ATCC 24843) OX=284812 GN=fps1 PE=1 SV=1	39.516	640860	10	40054
68.7	Q9P7L5	Q9P7L5	Ornithine aminotransferase car2	car2	sp|Q9P7L5|OAT_SCHPO Ornithine aminotransferase car2 OS=Schizosaccharomyces pombe (strain 972 / ATCC 24843) OX=284812 GN=car2 PE=2 SV=1	48.247	829740	14	39511
34.2	Q09914;Q9HE04	Q09914	GTP-binding protein rho1	rho1	sp|Q09914|RHO1_SCHPO GTP-binding protein rho1 OS=Schizosaccharomyces pombe (strain 972 / ATCC 24843) OX=284812 GN=rho1 PE=2 SV=1	22.523	386810	3	38681
63.9	Q09676	Q09676	Probable phosphatase SPAC5H10.03	SPAC5H10.03	sp|Q09676|YA03_SCHPO Probable phosphatase SPAC5H10.03 OS=Schizosaccharomyces pombe (strain 972 / ATCC 24843) OX=284812 GN=SPAC5H10.03 PE=3 SV=1	24.716	462030	7	38503
52.1	P0CT84;P0CT83	P0CT84;P0CT83			sp|P0CT84|RL12B_SCHPO 60S ribosomal protein L12-B OS=Schizosaccharomyces pombe (strain 972 / ATCC 24843) OX=284812 GN=rpl1202 PE=3 SV=1;sp|P0CT83|RL12A_SCHPO 60S ribosomal protein L12-A OS=Schizosaccharomyces pombe (strain 972 / ATCC 24843) OX=284812 GN=rp	17.666	383270	6	38327
53.1	P52822;O74306	P52822;O74306	60S ribosomal protein L5-A;60S ribosomal protein L5-B	rpl5a;rpl5b	sp|P52822|RL5A_SCHPO 60S ribosomal protein L5-A OS=Schizosaccharomyces pombe (strain 972 / ATCC 24843) OX=284812 GN=rpl501 PE=1 SV=2;sp|O74306|RL5B_SCHPO 60S ribosomal protein L5-B OS=Schizosaccharomyces pombe (strain 972 / ATCC 24843) OX=284812 GN=rpl502	33.459	406210	8	36929
22.1	P0CT72;P0CT71;P0CT70	P0CT72;P0CT71;P0CT70			sp|P0CT72|RL2C_SCHPO 60S ribosomal protein L2-C OS=Schizosaccharomyces pombe (strain 972 / ATCC 24843) OX=284812 GN=rpl803 PE=3 SV=1;sp|P0CT71|RL2B_SCHPO 60S ribosomal protein L2-B OS=Schizosaccharomyces pombe (strain 972 / ATCC 24843) OX=284812 GN=rpl802	27.1	437410	4	36450
87.1	O36032	O36032	Glutaredoxin-1	grx1	sp|O36032|GLRX1_SCHPO Glutaredoxin-1 OS=Schizosaccharomyces pombe (strain 972 / ATCC 24843) OX=284812 GN=grx1 PE=3 SV=1	11.261	218110	5	36351
43.9	O74864	O74864	60S acidic ribosomal protein P0	rpp0	sp|O74864|RLA0_SCHPO 60S acidic ribosomal protein P0 OS=Schizosaccharomyces pombe (strain 972 / ATCC 24843) OX=284812 GN=rpp0 PE=3 SV=1	33.565	325600	6	36178
42.3	O60135	O60135	Long-chain-fatty-acid--CoA ligase 1	lcf1	sp|O60135|LCF1_SCHPO Long-chain-fatty-acid--CoA ligase 1 OS=Schizosaccharomyces pombe (strain 972 / ATCC 24843) OX=284812 GN=lcf1 PE=3 SV=1	75.965	945350	20	35013
43.5	P05219;CON__ENSEMBL:ENSBTAP00000025008	P05219	Tubulin beta chain	nda3	sp|P05219|TBB_SCHPO Tubulin beta chain OS=Schizosaccharomyces pombe (strain 972 / ATCC 24843) OX=284812 GN=nda3 PE=1 SV=2	49.471	485500	12	34679
52.3	Q09741	Q09741	Spermidine synthase	SPBC12C2.07c	sp|Q09741|SPEE_SCHPO Spermidine synthase OS=Schizosaccharomyces pombe (strain 972 / ATCC 24843) OX=284812 GN=SPBC12C2.07c PE=3 SV=1	33.149	552160	9	34510
73.9	O42700	O42700	Transaldolase	tal1	sp|O42700|TAL1_SCHPO Transaldolase OS=Schizosaccharomyces pombe (strain 972 / ATCC 24843) OX=284812 GN=tal1 PE=1 SV=2	35.238	619850	8	34436
52.6	P40921	P40921	Elongation factor 1-gamma	tef3	sp|P40921|EF1G_SCHPO Elongation factor 1-gamma OS=Schizosaccharomyces pombe (strain 972 / ATCC 24843) OX=284812 GN=tef3 PE=1 SV=1	45.786	748380	11	34017
45.6	Q9UUC1	Q9UUC1	60S ribosomal protein L21-A	rpl21a	sp|Q9UUC1|RL21A_SCHPO 60S ribosomal protein L21-A OS=Schizosaccharomyces pombe (strain 972 / ATCC 24843) OX=284812 GN=rpl2101 PE=3 SV=1	18.38	203530	3	33922
50.8	O14289	O14289	3-isopropylmalate dehydratase	leu2	sp|O14289|LEUC_SCHPO 3-isopropylmalate dehydratase OS=Schizosaccharomyces pombe (strain 972 / ATCC 24843) OX=284812 GN=leu2 PE=1 SV=1	82.782	1182500	24	33786
45.9	O94354	O94354	Argininosuccinate synthase	arg12	sp|O94354|ASSY_SCHPO Argininosuccinate synthase OS=Schizosaccharomyces pombe (strain 972 / ATCC 24843) OX=284812 GN=arg12 PE=3 SV=1	46.084	709250	14	33774
52	P78917	P78917	Glucose-6-phosphate isomerase	pgi1	sp|P78917|G6PI_SCHPO Glucose-6-phosphate isomerase OS=Schizosaccharomyces pombe (strain 972 / ATCC 24843) OX=284812 GN=pgi1 PE=1 SV=2	60.883	876320	17	33705
34.5	O94700	O94700	Multiprotein-bridging factor 1	mbf1	sp|O94700|MBF1_SCHPO Multiprotein-bridging factor 1 OS=Schizosaccharomyces pombe (strain 972 / ATCC 24843) OX=284812 GN=mbf1 PE=3 SV=1	15.979	299580	3	33287
61.5	P52808	P52808	60S ribosomal protein L30-1	rpl30a	sp|P52808|RL30A_SCHPO 60S ribosomal protein L30-1 OS=Schizosaccharomyces pombe (strain 972 / ATCC 24843) OX=284812 GN=rpl3001 PE=3 SV=2	11.591	199160	4	33193
33.8	O94560	O94560	Uncharacterized WD repeat-containing protein C1773.01	SPBC1773.01	sp|O94560|YGD1_SCHPO Uncharacterized WD repeat-containing protein C1773.01 OS=Schizosaccharomyces pombe (strain 972 / ATCC 24843) OX=284812 GN=SPBC1773.01 PE=4 SV=1	69.494	994110	13	33137
52.1	P78780	P78780	Probable aspartate-semialdehyde dehydrogenase	SPCC1827.06c	sp|P78780|DHAS_SCHPO Probable aspartate-semialdehyde dehydrogenase OS=Schizosaccharomyces pombe (strain 972 / ATCC 24843) OX=284812 GN=SPCC1827.06c PE=1 SV=2	38.55	628850	10	33097
80.8	O59804	O59804	10 kDa heat shock protein, mitochondrial	hsp10	sp|O59804|CH10_SCHPO 10 kDa heat shock protein, mitochondrial OS=Schizosaccharomyces pombe (strain 972 / ATCC 24843) OX=284812 GN=hsp10 PE=1 SV=1	11.282	197490	4	32914
60.4	P42657	P42657	DNA damage checkpoint protein rad25	rad25	sp|P42657|RAD25_SCHPO Checkpoint signal transducer rad25 OS=Schizosaccharomyces pombe (strain 972 / ATCC 24843) OX=284812 GN=rad25 PE=1 SV=1	30.369	555710	10	32689
42.9	O13998	O13998	Obg-like ATPase 1	SPAC27E2.03c	sp|O13998|OLA1_SCHPO Obg-like ATPase 1 OS=Schizosaccharomyces pombe (strain 972 / ATCC 24843) OX=284812 GN=SPAC27E2.03c PE=1 SV=1	44.332	680720	13	32415
43.5	P46595	P46595	Ubiquitin-conjugating enzyme E2 4	ubc4	sp|P46595|UBC4_SCHPO Ubiquitin-conjugating enzyme E2 4 OS=Schizosaccharomyces pombe (strain 972 / ATCC 24843) OX=284812 GN=ubc4 PE=1 SV=1	16.476	128720	4	32179
39.8	Q9UUE6	Q9UUE6	Lysine--tRNA ligase, cytoplasmic	krs1	sp|Q9UUE6|SYKC_SCHPO Lysine--tRNA ligase, cytoplasmic OS=Schizosaccharomyces pombe (strain 972 / ATCC 24843) OX=284812 GN=krs1 PE=3 SV=1	67.493	944210	18	31474
15.1	O42937	O42937	Probable coatomer subunit beta	sec27	sp|O42937|COPB2_SCHPO Probable coatomer subunit beta OS=Schizosaccharomyces pombe (strain 972 / ATCC 24843) OX=284812 GN=sec27 PE=3 SV=2	89.802	1441800	2	31343
65.8	P18869	P18869	3-isopropylmalate dehydrogenase	leu1	sp|P18869|LEU3_SCHPO 3-isopropylmalate dehydrogenase OS=Schizosaccharomyces pombe (strain 972 / ATCC 24843) OX=284812 GN=leu1 PE=1 SV=1	39.732	630980	12	30047
44.6	Q09900	Q09900	60S ribosomal protein L38-2	rpl38b	sp|Q09900|RL38B_SCHPO 60S ribosomal protein L38-2 OS=Schizosaccharomyces pombe (strain 972 / ATCC 24843) OX=284812 GN=rpl3802 PE=3 SV=1	8.3388	119420	2	29855
57.6	P35679	P35679	60S ribosomal protein L4-A	rpl4a	sp|P35679|RL4A_SCHPO 60S ribosomal protein L4-A OS=Schizosaccharomyces pombe (strain 972 / ATCC 24843) OX=284812 GN=rpl402 PE=1 SV=2	39.767	497080	19	29240
48.2	P78773	P78773	Probable acetyl-coenzyme A synthetase		sp|P78773|ACSA_SCHPO Probable acetyl-coenzyme A synthetase OS=Schizosaccharomyces pombe (strain 972 / ATCC 24843) OX=284812 GN=SPCC191.02c PE=1 SV=2	73.035	1070400	17	28930
57.9	Q09781	Q09781	40S ribosomal protein S1-A	rps101	sp|Q09781|RS3A1_SCHPO 40S ribosomal protein S1-A OS=Schizosaccharomyces pombe (strain 972 / ATCC 24843) OX=284812 GN=rps101 PE=3 SV=2	28.488	460900	12	28806
19.4	P41891	P41891	Protein gar2	gar2	sp|P41891|GAR2_SCHPO Protein gar2 OS=Schizosaccharomyces pombe (strain 972 / ATCC 24843) OX=284812 GN=gar2 PE=1 SV=2	52.987	460350	7	28772
42.6	Q9USX4	Q9USX4	60S ribosomal protein L33-A	rpl33a	sp|Q9USX4|RL33A_SCHPO 60S ribosomal protein L33-A OS=Schizosaccharomyces pombe (strain 972 / ATCC 24843) OX=284812 GN=rpl35b PE=3 SV=2	12.187	257350	4	28594
3.3	O14086	O14086	DNA-directed RNA polymerase I subunit rpa49	rpa49	sp|O14086|RPA49_SCHPO DNA-directed RNA polymerase I subunit rpa49 OS=Schizosaccharomyces pombe (strain 972 / ATCC 24843) OX=284812 GN=rpa49 PE=2 SV=1	48.066	736510	1	28327
49.7	P79071	P79071	60S ribosomal protein L6	rpl6	sp|P79071|RL6_SCHPO 60S ribosomal protein L6 OS=Schizosaccharomyces pombe (strain 972 / ATCC 24843) OX=284812 GN=rpl6 PE=1 SV=2	21.248	254660	6	28296
53.9	P54874	P54874	Hydroxymethylglutaryl-CoA synthase	hcs1	sp|P54874|HMCS_SCHPO Hydroxymethylglutaryl-CoA synthase OS=Schizosaccharomyces pombe (strain 972 / ATCC 24843) OX=284812 GN=hcs1 PE=1 SV=1	49.238	649920	14	28258
50.6	Q9UUE1	Q9UUE1	Pyruvate carboxylase	pyr1	sp|Q9UUE1|PYC_SCHPO Pyruvate carboxylase OS=Schizosaccharomyces pombe (strain 972 / ATCC 24843) OX=284812 GN=pyr1 PE=3 SV=1	130.86	1749000	34	28210
50	Q10344	Q10344	Translationally-controlled tumor protein homolog	p23fy	sp|Q10344|TCTP_SCHPO Translationally-controlled tumor protein homolog OS=Schizosaccharomyces pombe (strain 972 / ATCC 24843) OX=284812 GN=p23fy PE=1 SV=1	19.048	248300	3	27589
45.5	Q09756	Q09756	Hexokinase-1	hxk1	sp|Q09756|HXK1_SCHPO Hexokinase-1 OS=Schizosaccharomyces pombe (strain 972 / ATCC 24843) OX=284812 GN=hxk1 PE=1 SV=1	53.597	604660	9	27485
42.1	O13651	O13651	Isoleucine--tRNA ligase, cytoplasmic	irs1	sp|O13651|SYIC_SCHPO Isoleucine--tRNA ligase, cytoplasmic OS=Schizosaccharomyces pombe (strain 972 / ATCC 24843) OX=284812 GN=irs1 PE=3 SV=1	122.91	1294300	26	25885
63	P22774-2;P22774	P22774-2;P22774	Heat shock 70 kDa protein, mitochondrial	ssp1	sp|P22774-2|HSP7M_SCHPO Isoform Short of Iron-sulfur cluster biogenesis chaperone, mitochondrial OS=Schizosaccharomyces pombe (strain 972 / ATCC 24843) OX=284812 GN=ssc1;sp|P22774|HSP7M_SCHPO Iron-sulfur cluster biogenesis chaperone, mitochondrial OS=Schiz	69.411	904210	20	25835
39.9	O59858	O59858	Glutathione peroxidase	gpx1	sp|O59858|GPX1_SCHPO Glutathione peroxidase-like peroxiredoxin gpx1 OS=Schizosaccharomyces pombe (strain 972 / ATCC 24843) OX=284812 GN=gpx1 PE=1 SV=1	18.06	255970	4	25597
59.6	O14043	O14043	Uncharacterized protein C2C4.10c	SPAC2C4.10c	sp|O14043|YEYA_SCHPO Uncharacterized protein C2C4.10c OS=Schizosaccharomyces pombe (strain 972 / ATCC 24843) OX=284812 GN=SPAC2C4.10c PE=4 SV=1	19.686	255960	10	25596
39.3	O13917	O13917	Hypoxanthine-guanine phosphoribosyltransferase	hpt1	sp|O13917|HPRT_SCHPO Hypoxanthine-guanine phosphoribosyltransferase OS=Schizosaccharomyces pombe (strain 972 / ATCC 24843) OX=284812 GN=hpt1 PE=3 SV=1	23.572	230340	5	25593
49.4	P28758	P28758	Superoxide dismutase [Cu-Zn]	sod1	sp|P28758|SODC_SCHPO Superoxide dismutase [Cu-Zn] OS=Schizosaccharomyces pombe (strain 972 / ATCC 24843) OX=284812 GN=sod1 PE=2 SV=1	15.912	200940	3	25118
30.5	Q9Y7I8	Q9Y7I8	Zuotin	zuo1	sp|Q9Y7I8|ZUO1_SCHPO Zuotin OS=Schizosaccharomyces pombe (strain 972 / ATCC 24843) OX=284812 GN=zuo1 PE=1 SV=2	50.209	595400	8	24808
51	P36591	P36591	Dihydrofolate reductase	dfr1	sp|P36591|DYR_SCHPO Dihydrofolate reductase OS=Schizosaccharomyces pombe (strain 972 / ATCC 24843) OX=284812 GN=dfr1 PE=2 SV=2	51.522	619800	12	24792
14.7	P17476;P17477	P17476;P17477	60S acidic ribosomal protein P1-alpha 1;60S acidic ribosomal protein P1-alpha 3	rpa1;rpa3	sp|P17476|RLA1_SCHPO 60S acidic ribosomal protein P1-alpha 1 OS=Schizosaccharomyces pombe (strain 972 / ATCC 24843) OX=284812 GN=rpp101 PE=3 SV=1;sp|P17477|RLA3_SCHPO 60S acidic ribosomal protein P1-alpha 3 OS=Schizosaccharomyces pombe (strain 972 / ATCC 2	11.141	74132	1	24711
44.7	P31209	P31209	Polyadenylate-binding protein, cytoplasmic and nuclear	pab1	sp|P31209|PABP_SCHPO Polyadenylate-binding protein, cytoplasmic and nuclear OS=Schizosaccharomyces pombe (strain 972 / ATCC 24843) OX=284812 GN=pab1 PE=1 SV=2	71.512	714520	19	24639
41.8	O74904	O74904	60S ribosomal protein L35	rpl35	sp|O74904|RL35_SCHPO 60S ribosomal protein L35 OS=Schizosaccharomyces pombe (strain 972 / ATCC 24843) OX=284812 GN=rpl35 PE=1 SV=1	14.302	146930	1	24488
71.7	Q10494	Q10494	Uncharacterized oxidoreductase C26F1.07	SPAC26F1.07	sp|Q10494|YDG7_SCHPO Uncharacterized oxidoreductase C26F1.07 OS=Schizosaccharomyces pombe (strain 972 / ATCC 24843) OX=284812 GN=SPAC26F1.07 PE=3 SV=1	36.192	439190	9	24400
44.3	P0CT65;P0CT64	P0CT65;P0CT64			sp|P0CT65|RS16B_SCHPO 40S ribosomal protein S16-B OS=Schizosaccharomyces pombe (strain 972 / ATCC 24843) OX=284812 GN=rps1602 PE=3 SV=1;sp|P0CT64|RS16A_SCHPO 40S ribosomal protein S16-A OS=Schizosaccharomyces pombe (strain 972 / ATCC 24843) OX=284812 GN=rp	15.395	262270	4	23843
63.2	O74538	O74538	60S ribosomal protein L27-B	rpl27b	sp|O74538|RL27B_SCHPO 60S ribosomal protein L27-B OS=Schizosaccharomyces pombe (strain 972 / ATCC 24843) OX=284812 GN=rpl2702 PE=3 SV=1	15.305	141410	9	23568
41.3	P36604	P36604	78 kDa glucose-regulated protein homolog	bip1	sp|P36604|BIP_SCHPO Endoplasmic reticulum chaperone BiP OS=Schizosaccharomyces pombe (strain 972 / ATCC 24843) OX=284812 GN=bip1 PE=3 SV=2	73.226	722420	20	23304
51.9	Q9USM6	Q9USM6	Probable cytochrome b5 2	oca8	sp|Q9USM6|CYB52_SCHPO Probable cytochrome b5 2 OS=Schizosaccharomyces pombe (strain 972 / ATCC 24843) OX=284812 GN=oca8 PE=3 SV=1	14.252	159270	5	22753
85.1	Q9Y7Z3	Q9Y7Z3	Putative acyl-CoA-binding protein	SPBC1539.06	sp|Q9Y7Z3|ACBP_SCHPO Putative acyl-CoA-binding protein OS=Schizosaccharomyces pombe (strain 972 / ATCC 24843) OX=284812 GN=SPBC1539.06 PE=3 SV=1	9.838	134860	5	22476
43.9	O14321	O14321	Sterol 24-C-methyltransferase erg6	erg6	sp|O14321|ERG6_SCHPO Sterol 24-C-methyltransferase erg6 OS=Schizosaccharomyces pombe (strain 972 / ATCC 24843) OX=284812 GN=erg6 PE=2 SV=1	42.867	392600	9	21811
18.2	Q92344	Q92344	Kinetochore protein fta5	fta5	sp|Q92344|PFL8_SCHPO Putative cell agglutination protein pfl8 OS=Schizosaccharomyces pombe (strain 972 / ATCC 24843) OX=284812 GN=pfl8 PE=1 SV=1	41	261480	5	21790
31.3	Q10484	Q10484	Uncharacterized protein C17C9.12	SPAC17C9.12	sp|Q10484|SCS22_SCHPO Vesicle-associated membrane protein-associated protein scs22 OS=Schizosaccharomyces pombe (strain 972 / ATCC 24843) OX=284812 GN=scs22 PE=1 SV=2	34.005	303130	4	21652
49.4	O14075	O14075	Putative 2-hydroxyacid dehydrogenase UNK4.10		sp|O14075|YEAA_SCHPO Putative 2-hydroxyacid dehydrogenase UNK4.10 OS=Schizosaccharomyces pombe (strain 972 / ATCC 24843) OX=284812 GN=SPAC2E11.10 PE=2 SV=1	36.701	432990	9	21649
31.1	P57728	P57728	60S ribosomal protein L28-B	rpl28b	sp|P57728|RL28B_SCHPO 60S ribosomal protein L28-B OS=Schizosaccharomyces pombe (strain 972 / ATCC 24843) OX=284812 GN=rpl2801 PE=1 SV=1	16.685	191760	4	21307
38.9	O43003	O43003	Protein mmf1, mitochondrial	mmf1	sp|O43003|MMF1_SCHPO Protein mmf1, mitochondrial OS=Schizosaccharomyces pombe (strain 972 / ATCC 24843) OX=284812 GN=mmf1 PE=3 SV=1	17.543	212410	4	21241
40.6	Q09878	Q09878	Probable sulfite reductase [NADPH] flavoprotein component	SPCC584.01c	sp|Q09878|MET10_SCHPO Probable sulfite reductase [NADPH] flavoprotein component OS=Schizosaccharomyces pombe (strain 972 / ATCC 24843) OX=284812 GN=SPCC584.01c PE=3 SV=2	111.35	994660	23	21163
25.6	O60119	O60119	Vesicle-associated membrane protein-associated protein C16G5.05c	SPBC16G5.05c	sp|O60119|SCS2_SCHPO Vesicle-associated membrane protein-associated protein scs2 OS=Schizosaccharomyces pombe (strain 972 / ATCC 24843) OX=284812 GN=scs2 PE=1 SV=1	41.234	315550	5	21036
53.9	Q10289	Q10289	Fatty acid synthase subunit alpha;Acyl carrier;3-oxoacyl-[acyl-carrier-protein] reductase;3-oxoacyl-[acyl-carrier-protein] synthase	fas2	sp|Q10289|FAS2_SCHPO Fatty acid synthase subunit alpha OS=Schizosaccharomyces pombe (strain 972 / ATCC 24843) OX=284812 GN=fas2 PE=1 SV=2	202.17	2097800	54	20978
32.4	O74413	O74413	Chorismate synthase		sp|O74413|AROC_SCHPO Chorismate synthase OS=Schizosaccharomyces pombe (strain 972 / ATCC 24843) OX=284812 GN=SPCC1223.14 PE=3 SV=2	42.324	454310	7	20650
56.2	O74484	O74484	Mannose-1-phosphate guanyltransferase	mpg1	sp|O74484|MPG1_SCHPO Mannose-1-phosphate guanyltransferase OS=Schizosaccharomyces pombe (strain 972 / ATCC 24843) OX=284812 GN=mpg1 PE=2 SV=1	39.718	385630	8	20296
46.7	Q9USI5	Q9USI5	Heat shock protein sti1 homolog	sti1	sp|Q9USI5|STI1_SCHPO Heat shock protein sti1 homolog OS=Schizosaccharomyces pombe (strain 972 / ATCC 24843) OX=284812 GN=sti1 PE=3 SV=1	65.544	724380	18	20122
23.6	Q9UTI8	Q9UTI8	60S ribosomal protein L42	rpl42	sp|Q9UTI8|RL44_SCHPO 60S ribosomal protein L42 OS=Schizosaccharomyces pombe (strain 972 / ATCC 24843) OX=284812 GN=rpl42 PE=1 SV=3	12.205	60334	2	20111
44.7	Q1K9C2	Q1K9C2	Sulfite reductase [NADPH] subunit beta	sir1	sp|Q1K9C2|MET5_SCHPO Sulfite reductase [NADPH] subunit beta OS=Schizosaccharomyces pombe (strain 972 / ATCC 24843) OX=284812 GN=sir1 PE=3 SV=1	163.84	1446000	33	20083
54.7	Q09668	Q09668	60S ribosomal protein L22	rpl22	sp|Q09668|RL22_SCHPO 60S ribosomal protein L22 OS=Schizosaccharomyces pombe (strain 972 / ATCC 24843) OX=284812 GN=rpl22 PE=1 SV=3	13.32	100390	3	20077
42.9	O75005	O75005	Valine--tRNA ligase	vas2	sp|O75005|SYV_SCHPO Valine--tRNA ligase OS=Schizosaccharomyces pombe (strain 972 / ATCC 24843) OX=284812 GN=vas2 PE=3 SV=1	111.32	1039100	26	19982
75.1	P87147	P87147	Nascent polypeptide-associated complex subunit alpha	egd2	sp|P87147|NACA_SCHPO Nascent polypeptide-associated complex subunit alpha OS=Schizosaccharomyces pombe (strain 972 / ATCC 24843) OX=284812 GN=egd2 PE=1 SV=1	18.785	217470	4	19770
53.6	O42993	O42993	Peptidyl-prolyl cis-trans isomerase	fkh1	sp|O42993|FKBP_SCHPO Peptidyl-prolyl cis-trans isomerase OS=Schizosaccharomyces pombe (strain 972 / ATCC 24843) OX=284812 GN=fkh1 PE=3 SV=1	12.043	136990	3	19570
56.4	Q9P7W3	Q9P7W3	Probable ATP-citrate synthase subunit 1	SPBC1703.07	sp|Q9P7W3|ACL1_SCHPO Probable ATP-citrate synthase subunit 1 OS=Schizosaccharomyces pombe (strain 972 / ATCC 24843) OX=284812 GN=SPBC1703.07 PE=1 SV=1	67.203	738440	16	19433
30.4	Q9P7H4	Q9P7H4	Serine/threonine-protein phosphatase 2A activator 2	rrd2	sp|Q9P7H4|PTPA2_SCHPO Serine/threonine-protein phosphatase 2A activator 2 OS=Schizosaccharomyces pombe (strain 972 / ATCC 24843) OX=284812 GN=rrd2 PE=3 SV=1	40.288	281150	8	18743
42.5	Q9UUG0	Q9UUG0	Fatty acid synthase subunit beta;3-hydroxyacyl-[acyl-carrier-protein] dehydratase;Enoyl-[acyl-carrier-protein] reductase [NADH];[Acyl-carrier-protein] acetyltransferase;[Acyl-carrier-protein] malonyltransferase;S-acyl fatty acid synthase thioesterase	fas1	sp|Q9UUG0|FAS1_SCHPO Fatty acid synthase subunit beta OS=Schizosaccharomyces pombe (strain 972 / ATCC 24843) OX=284812 GN=fas1 PE=1 SV=1	230.56	1766700	34	18403
46.6	O74905	O74905	60S ribosomal protein L9-B	rpl9b	sp|O74905|RL9B_SCHPO 60S ribosomal protein L9-B OS=Schizosaccharomyces pombe (strain 972 / ATCC 24843) OX=284812 GN=rpl902 PE=3 SV=1	21.382	145840	6	18230
49.2	P40386	P40386	Probable thiamine biosynthetic bifunctional enzyme;Thiamine-phosphate synthase;Hydroxyethylthiazole kinase	thi4	sp|P40386|THI6_SCHPO Probable thiamine biosynthetic bifunctional enzyme OS=Schizosaccharomyces pombe (strain 972 / ATCC 24843) OX=284812 GN=thi4 PE=2 SV=1	55.565	488640	10	18098
43.2	O74409	O74409	Uricase	SPCC1223.09	sp|O74409|URIC_SCHPO Uricase OS=Schizosaccharomyces pombe (strain 972 / ATCC 24843) OX=284812 GN=SPCC1223.09 PE=1 SV=1	33.61	269700	7	17980
58.4	Q09127	Q09127	60S ribosomal protein L10-A	rpl10a	sp|Q09127|RL10A_SCHPO 60S ribosomal protein L10-A OS=Schizosaccharomyces pombe (strain 972 / ATCC 24843) OX=284812 GN=rpl1001 PE=2 SV=2	25.373	160370	11	17818
50.6	Q92375	Q92375	Thioredoxin reductase	trr1	sp|Q92375|TRXB_SCHPO Thioredoxin reductase OS=Schizosaccharomyces pombe (strain 972 / ATCC 24843) OX=284812 GN=trr1 PE=1 SV=1	34.618	212250	5	17688
24	O14369	O14369	Probable RNA-binding protein sce3	sce3	sp|O14369|SCE3_SCHPO Probable RNA-binding protein sce3 OS=Schizosaccharomyces pombe (strain 972 / ATCC 24843) OX=284812 GN=sce3 PE=1 SV=1	42.513	222240	4	17096
43.3	O94567	O94567	Probable asparagine--tRNA ligase, cytoplasmic	nrs1	sp|O94567|SYNC_SCHPO Probable asparagine--tRNA ligase, cytoplasmic OS=Schizosaccharomyces pombe (strain 972 / ATCC 24843) OX=284812 GN=nrs1 PE=3 SV=1	63.869	492020	12	16966
66	P25457	P25457	60S ribosomal protein L7-B	rpl7b	sp|P25457|RL7B_SCHPO 60S ribosomal protein L7-B OS=Schizosaccharomyces pombe (strain 972 / ATCC 24843) OX=284812 GN=rpl702 PE=3 SV=1	28.449	235980	10	16856
28.2	Q9P7U2;G2TRN6	Q9P7U2;G2TRN6	Putative aryl-alcohol dehydrogenase C977.14c;Putative aryl-alcohol dehydrogenase C750.01	SPAC977.14c;SPAC750.01	sp|Q9P7U2|YI7E_SCHPO Putative aryl-alcohol dehydrogenase C977.14c OS=Schizosaccharomyces pombe (strain 972 / ATCC 24843) OX=284812 GN=SPAC977.14c PE=1 SV=1;sp|G2TRN6|YLZ1_SCHPO Putative aryl-alcohol dehydrogenase C750.01 OS=Schizosaccharomyces pombe (strai	39.914	403750	10	16823
51.3	P32390	P32390	Actin-related protein 3	act2	sp|P32390|ARP3_SCHPO Actin-related protein 3 OS=Schizosaccharomyces pombe (strain 972 / ATCC 24843) OX=284812 GN=act2 PE=1 SV=1	47.373	369370	13	16790
54.3	O60155	O60155	Putative proline--tRNA ligase C19C7.06	prs1	sp|O60155|PRS1_SCHPO Putative proline--tRNA ligase C19C7.06 OS=Schizosaccharomyces pombe (strain 972 / ATCC 24843) OX=284812 GN=prs1 PE=3 SV=1	78.874	697720	17	16612
40.1	O14344	O14344	Inosine-5-monophosphate dehydrogenase	gua1	sp|O14344|IMDH_SCHPO Inosine-5-monophosphate dehydrogenase OS=Schizosaccharomyces pombe (strain 972 / ATCC 24843) OX=284812 GN=gua1 PE=2 SV=1	57.026	346280	11	16490
44.9	Q9P772	Q9P772	GMP synthase [glutamine-hydrolyzing]	gua1	sp|Q9P772|GUAA_SCHPO GMP synthase [glutamine-hydrolyzing] OS=Schizosaccharomyces pombe (strain 972 / ATCC 24843) OX=284812 GN=gua1 PE=3 SV=1	60.044	526750	16	16461
41.4	Q10349	Q10349	Putative phosphoserine aminotransferase	SPAC1F12.07	sp|Q10349|SERC_SCHPO Putative phosphoserine aminotransferase OS=Schizosaccharomyces pombe (strain 972 / ATCC 24843) OX=284812 GN=SPAC1F12.07 PE=3 SV=1	42.797	290500	9	16139
65.6	Q9UTQ6	Q9UTQ6	40S ribosomal protein S15-B	rps15b	sp|Q9UTQ6|RS15B_SCHPO 40S ribosomal protein S15-B OS=Schizosaccharomyces pombe (strain 972 / ATCC 24843) OX=284812 GN=rps1502 PE=1 SV=1	17.633	128100	5	16012
47.3	O13370	O13370	ATP-dependent RNA helicase ded1	ded1	sp|O13370|DED1_SCHPO ATP-dependent RNA helicase ded1 OS=Schizosaccharomyces pombe (strain 972 / ATCC 24843) OX=284812 GN=ded1 PE=1 SV=1	69.758	601300	18	15824
39	O13991	O13991	Uncharacterized oxidoreductase C26H5.09c	SPAC26H5.09c	sp|O13991|YEG9_SCHPO Uncharacterized oxidoreductase C26H5.09c OS=Schizosaccharomyces pombe (strain 972 / ATCC 24843) OX=284812 GN=SPAC26H5.09c PE=2 SV=3	41.432	298490	11	15710
53.6	P36605	P36605	Histidinol-phosphate aminotransferase	his3	sp|P36605|HIS8_SCHPO Histidinol-phosphate aminotransferase OS=Schizosaccharomyces pombe (strain 972 / ATCC 24843) OX=284812 GN=his3 PE=3 SV=1	42.733	329300	11	15681
46.8	Q9P7L1	Q9P7L1	Thioredoxin domain-containing protein C21C3.12c	SPBC21C3.12c	sp|Q9P7L1|YOSC_SCHPO Thioredoxin domain-containing protein C21C3.12c OS=Schizosaccharomyces pombe (strain 972 / ATCC 24843) OX=284812 GN=SPBC21C3.12c PE=3 SV=1	13.932	139540	5	15504
19.7	P0CT63;P0CT62	P0CT63;P0CT62			sp|P0CT63|RS30_SCHPO 40S ribosomal protein S30-B OS=Schizosaccharomyces pombe (strain 972 / ATCC 24843) OX=284812 GN=rps3002 PE=3 SV=1;sp|P0CT62|RS30A_SCHPO 40S ribosomal protein S30-A OS=Schizosaccharomyces pombe (strain 972 / ATCC 24843) OX=284812 GN=rps	6.9101	30935	1	15468
31.4	P40387	P40387	Alpha,alpha-trehalose-phosphate synthase [UDP-forming]	tps1	sp|P40387|TPS1_SCHPO Alpha,alpha-trehalose-phosphate synthase [UDP-forming] OS=Schizosaccharomyces pombe (strain 972 / ATCC 24843) OX=284812 GN=tps1 PE=1 SV=2	58.493	337100	8	15323
15	P39825	P39825	Profilin	cdc3	sp|P39825|PROF_SCHPO Profilin OS=Schizosaccharomyces pombe (strain 972 / ATCC 24843) OX=284812 GN=cdc3 PE=1 SV=1	13.411	60660	1	15165
41.4	Q9P3T6;O14277	Q9P3T6;O14277	40S ribosomal protein S5-B;40S ribosomal protein S5-A	rps5b;rps5a	sp|Q9P3T6|RS5B_SCHPO 40S ribosomal protein S5-B OS=Schizosaccharomyces pombe (strain 972 / ATCC 24843) OX=284812 GN=rps502 PE=3 SV=1;sp|O14277|RS5A_SCHPO 40S ribosomal protein S5-A OS=Schizosaccharomyces pombe (strain 972 / ATCC 24843) OX=284812 GN=rps5 PE	22.357	166260	5	15114
37.9	P05764	P05764	40S ribosomal protein S21	rps21	sp|P05764|RS21_SCHPO 40S ribosomal protein S21 OS=Schizosaccharomyces pombe (strain 972 / ATCC 24843) OX=284812 GN=rps21 PE=1 SV=2	9.6166	75489	1	15098
31	Q9P3A7	Q9P3A7	Cell division cycle protein 48	cdc48	sp|Q9P3A7|CDC48_SCHPO Cell division cycle protein 48 OS=Schizosaccharomyces pombe (strain 972 / ATCC 24843) OX=284812 GN=cdc48 PE=1 SV=2	90.124	686310	13	14920
40	Q8WZJ7	Q8WZJ7	C-1-tetrahydrofolate synthase, cytoplasmic;Methylenetetrahydrofolate dehydrogenase;Methenyltetrahydrofolate cyclohydrolase;Formyltetrahydrofolate synthetase	SPBC839.16	sp|Q8WZJ7|C1TC_SCHPO C-1-tetrahydrofolate synthase, cytoplasmic OS=Schizosaccharomyces pombe (strain 972 / ATCC 24843) OX=284812 GN=SPBC839.16 PE=3 SV=1	101.2	800810	24	14830
55.6	O14339	O14339	60S ribosomal protein L17-A	rpl17a	sp|O14339|RL17A_SCHPO 60S ribosomal protein L17-A OS=Schizosaccharomyces pombe (strain 972 / ATCC 24843) OX=284812 GN=rpl1701 PE=3 SV=1	20.814	144150	12	14415
31.7	Q9UTG1	Q9UTG1	Putative purine nucleoside phosphorylase	SPAC1805.16c	sp|Q9UTG1|PNPH_SCHPO Putative purine nucleoside phosphorylase OS=Schizosaccharomyces pombe (strain 972 / ATCC 24843) OX=284812 GN=SPAC1805.16c PE=3 SV=1	34.238	252060	7	14003
51	O14351	O14351	Uncharacterized oxidoreductase C30D10.05c	SPBC30D10.05c	sp|O14351|YB45_SCHPO Uncharacterized oxidoreductase C30D10.05c OS=Schizosaccharomyces pombe (strain 972 / ATCC 24843) OX=284812 GN=SPBC30D10.05c PE=3 SV=1	26.645	250060	8	13892
53.6	Q92371	Q92371	Nascent polypeptide-associated complex subunit beta	btf3	sp|Q92371|NACB_SCHPO Nascent polypeptide-associated complex subunit beta OS=Schizosaccharomyces pombe (strain 972 / ATCC 24843) OX=284812 GN=btf3 PE=2 SV=2	16.202	96339	2	13763
41.2	P04689	P04689	Tubulin alpha-2 chain	tub1	sp|P04689|TBA2_SCHPO Tubulin alpha-2 chain OS=Schizosaccharomyces pombe (strain 972 / ATCC 24843) OX=284812 GN=tub1 PE=1 SV=2	50.535	273460	11	13673
38.4	Q10232	Q10232	60S ribosomal protein L9-A	rpl9a	sp|Q10232|RL9A_SCHPO 60S ribosomal protein L9-A OS=Schizosaccharomyces pombe (strain 972 / ATCC 24843) OX=284812 GN=rpl901 PE=3 SV=1	21.513	150060	6	13642
43.8	O13831	O13831	Tryptophan synthase	trp2	sp|O13831|TRP_SCHPO Tryptophan synthase OS=Schizosaccharomyces pombe (strain 972 / ATCC 24843) OX=284812 GN=trp2 PE=2 SV=1	75.436	454890	12	13379
35.7	O14192	O14192	Aromatic amino acid aminotransferase C56E4.03	SPAC56E4.03	sp|O14192|AATR1_SCHPO Aromatic amino acid aminotransferase C56E4.03 OS=Schizosaccharomyces pombe (strain 972 / ATCC 24843) OX=284812 GN=SPAC56E4.03 PE=3 SV=1	53.166	279790	6	13323
44.1	O13775	O13775	Probable glutamate--tRNA ligase, cytoplasmic	gus1	sp|O13775|SYEC_SCHPO Probable glutamate--tRNA ligase, cytoplasmic OS=Schizosaccharomyces pombe (strain 972 / ATCC 24843) OX=284812 GN=gus1 PE=1 SV=1	80.749	544720	11	13286
30.3	Q9UTG4	Q9UTG4	40S ribosomal protein S26-B	rps26b	sp|Q9UTG4|RS26B_SCHPO 40S ribosomal protein S26-B OS=Schizosaccharomyces pombe (strain 972 / ATCC 24843) OX=284812 GN=rps2602 PE=3 SV=1	13.862	53003	3	13251
47.9	P87142	P87142	Heat shock protein 70 homolog C57A7.12	SPAC57A7.12	sp|P87142|YDMC_SCHPO Heat shock protein 70 homolog C57A7.12 OS=Schizosaccharomyces pombe (strain 972 / ATCC 24843) OX=284812 GN=SPAC57A7.12 PE=1 SV=3	61.285	317080	13	13212
39.6	Q10490	Q10490	Putative leucine--tRNA ligase, cytoplasmic	lrs1	sp|Q10490|SYLC_SCHPO Putative leucine--tRNA ligase, cytoplasmic OS=Schizosaccharomyces pombe (strain 972 / ATCC 24843) OX=284812 GN=lrs1 PE=1 SV=1	126.45	792050	23	12984
58.3	P28189	P28189	40S ribosomal protein S13	rps13	sp|P28189|RS13_SCHPO 40S ribosomal protein S13 OS=Schizosaccharomyces pombe (strain 972 / ATCC 24843) OX=284812 GN=rps13 PE=1 SV=2	16.953	113430	5	12603
42.8	O94273	O94273	Peptidyl-prolyl cis-trans isomerase B	cyp4	sp|O94273|PPIB_SCHPO Peptidyl-prolyl cis-trans isomerase B OS=Schizosaccharomyces pombe (strain 972 / ATCC 24843) OX=284812 GN=cyp4 PE=3 SV=1	22.156	137450	4	12495
46.6	O60064	O60064	Probable mannose-1-phosphate guanyltransferase	SPBC13G1.02	sp|O60064|YBB2_SCHPO Probable mannose-1-phosphate guanyltransferase OS=Schizosaccharomyces pombe (strain 972 / ATCC 24843) OX=284812 GN=SPBC13G1.02 PE=3 SV=1	46.096	271430	9	12338
50	P0CT80;P0CT79	P0CT80;P0CT79			sp|P0CT80|RS28B_SCHPO 40S ribosomal protein S28-B OS=Schizosaccharomyces pombe (strain 972 / ATCC 24843) OX=284812 GN=rps2802 PE=3 SV=1;sp|P0CT79|RS28A_SCHPO 40S ribosomal protein S28-A OS=Schizosaccharomyces pombe (strain 972 / ATCC 24843) OX=284812 GN=rp	7.6638	36965	2	12322
33.5	P36627	P36627	Cellular nucleic acid-binding protein homolog	byr3	sp|P36627|BYR3_SCHPO Cellular nucleic acid-binding protein homolog OS=Schizosaccharomyces pombe (strain 972 / ATCC 24843) OX=284812 GN=byr3 PE=4 SV=1	19.342	147540	4	12295
21.7	Q09188	Q09188	ADP,ATP carrier protein	anc1	sp|Q09188|ADT_SCHPO ADP,ATP carrier protein OS=Schizosaccharomyces pombe (strain 972 / ATCC 24843) OX=284812 GN=anc1 PE=1 SV=1	35.02	192210	5	12013
42.2	O00091	O00091	Glucose-6-phosphate 1-dehydrogenase	zwf1	sp|O00091|G6PD_SCHPO Glucose-6-phosphate 1-dehydrogenase OS=Schizosaccharomyces pombe (strain 972 / ATCC 24843) OX=284812 GN=zwf1 PE=3 SV=2	57.204	333910	9	11925
35.8	P36602	P36602	Ribonucleoside-diphosphate reductase large chain	cdc22	sp|P36602|RIR1_SCHPO Ribonucleoside-diphosphate reductase large chain OS=Schizosaccharomyces pombe (strain 972 / ATCC 24843) OX=284812 GN=cdc22 PE=1 SV=2	91.998	498540	11	11870
41.3	P40847	P40847	Switch-activating protein 1	sap1	sp|P40847|SAP1_SCHPO Switch-activating protein 1 OS=Schizosaccharomyces pombe (strain 972 / ATCC 24843) OX=284812 GN=sap1 PE=1 SV=2	29.127	177580	7	11839
43.3	O94255	O94255	Carbonic anhydrase	SPBP8B7.05c	sp|O94255|CAN_SCHPO Carbonic anhydrase OS=Schizosaccharomyces pombe (strain 972 / ATCC 24843) OX=284812 GN=SPBP8B7.05c PE=1 SV=2	37.009	247190	8	11771
19.4	P50998	P50998	AMP deaminase	ada1	sp|P50998|AMPD_SCHPO AMP deaminase OS=Schizosaccharomyces pombe (strain 972 / ATCC 24843) OX=284812 GN=ada1 PE=1 SV=3	95.886	500110	7	11630
44.1	P33075	P33075	Adenylate kinase	adk1	sp|P33075|KAD2_SCHPO Adenylate kinase OS=Schizosaccharomyces pombe (strain 972 / ATCC 24843) OX=284812 GN=adk1 PE=1 SV=1	24.375	184160	7	11510
41.4	Q9Y7L8	Q9Y7L8	40S ribosomal protein S0-A	rps0a	sp|Q9Y7L8|RSSA1_SCHPO 40S ribosomal protein S0-A OS=Schizosaccharomyces pombe (strain 972 / ATCC 24843) OX=284812 GN=rps001 PE=1 SV=1	31.759	137790	4	11482
60.6	O74793	O74793	Uncharacterized protein C26H8.11c	SPBC26H8.11c	sp|O74793|YOUB_SCHPO Uncharacterized protein C26H8.11c OS=Schizosaccharomyces pombe (strain 972 / ATCC 24843) OX=284812 GN=SPBC26H8.11c PE=4 SV=1	19.59	125790	5	11436
30.1	O14217	O14217	Probable mitochondrial import receptor subunit tom70	tom70	sp|O14217|TOM70_SCHPO Probable mitochondrial import receptor subunit tom70 OS=Schizosaccharomyces pombe (strain 972 / ATCC 24843) OX=284812 GN=tom70 PE=1 SV=1	69.516	389520	11	11129
37.5	Q9UT56	Q9UT56	40S ribosomal protein S26-A	rps26a	sp|Q9UT56|RS26A_SCHPO 40S ribosomal protein S26-A OS=Schizosaccharomyces pombe (strain 972 / ATCC 24843) OX=284812 GN=rps2601 PE=3 SV=1	13.876	44367	2	11092
32.8	O74960	O74960	Probable sphingolipid long chain base-responsive protein pil1	pil1	sp|O74960|PIL1_SCHPO Probable sphingolipid long chain base-responsive protein pil1 OS=Schizosaccharomyces pombe (strain 972 / ATCC 24843) OX=284812 GN=pil1 PE=1 SV=1	39.805	185530	7	10914
47.2	O42943	O42943	Uncharacterized ABC transporter ATP-binding protein C16H5.08c	SPBC16H5.08c	sp|O42943|YBP8_SCHPO Uncharacterized ABC transporter ATP-binding protein C16H5.08c OS=Schizosaccharomyces pombe (strain 972 / ATCC 24843) OX=284812 GN=SPBC16H5.08c PE=1 SV=1	69.212	315170	10	10868
50.2	Q42598	Q42598	Threonine synthase	thrc	sp|Q42598|THRC_SCHPO Threonine synthase OS=Schizosaccharomyces pombe (strain 972 / ATCC 24843) OX=284812 GN=thrc PE=1 SV=1	57.631	279880	7	10765
70.4	O43026	O43026	Glyceraldehyde-3-phosphate dehydrogenase 2	gpd3	sp|O43026|G3P2_SCHPO Glyceraldehyde-3-phosphate dehydrogenase 2 OS=Schizosaccharomyces pombe (strain 972 / ATCC 24843) OX=284812 GN=gpd3 PE=1 SV=1	35.674	223970	16	10665
29.4	P78820	P78820	Acetyl-CoA carboxylase;Biotin carboxylase	cut6	sp|P78820|ACAC_SCHPO Acetyl-CoA carboxylase OS=Schizosaccharomyces pombe (strain 972 / ATCC 24843) OX=284812 GN=cut6 PE=1 SV=2	256.84	1288800	32	10478
19.8	Q9P7F8	Q9P7F8	ATPase get3	get3	sp|Q9P7F8|GET3_SCHPO ATPase get3 OS=Schizosaccharomyces pombe (strain 972 / ATCC 24843) OX=284812 GN=get3 PE=1 SV=1	36.548	146510	3	10465
28.7	Q9HGL8	Q9HGL8	60S ribosomal protein L43-A	rpl43a	sp|Q9HGL8|RL43A_SCHPO 60S ribosomal protein L43-A OS=Schizosaccharomyces pombe (strain 972 / ATCC 24843) OX=284812 GN=rpl4301 PE=3 SV=1	10.422	41642	2	10411
40.9	P78890	P78890	Uncharacterized protein C23H3.15c		sp|P78890|YEPF_SCHPO Uncharacterized protein C23H3.15c OS=Schizosaccharomyces pombe (strain 972 / ATCC 24843) OX=284812 GN=SPAC23H3.15c PE=2 SV=4	34.692	176210	6	10365
32	O94517	O94517	Probable proteasome subunit alpha type-1	SPBC646.16	sp|O94517|PSA1_SCHPO Probable proteasome subunit alpha type-1 OS=Schizosaccharomyces pombe (strain 972 / ATCC 24843) OX=284812 GN=SPBC646.16 PE=3 SV=1	26.539	168340	3	9902.1
32.4	O14228	O14228	Probable phosphoribosylformylglycinamidine synthase	ade3	sp|O14228|PUR4_SCHPO Probable phosphoribosylformylglycinamidine synthase OS=Schizosaccharomyces pombe (strain 972 / ATCC 24843) OX=284812 GN=ade3 PE=3 SV=1	144.86	617960	15	9507
34.9	O74718	O74718	Eukaryotic peptide chain release factor GTP-binding subunit	sup35	sp|O74718|ERF3_SCHPO Eukaryotic peptide chain release factor GTP-binding subunit OS=Schizosaccharomyces pombe (strain 972 / ATCC 24843) OX=284812 GN=sup35 PE=1 SV=2	72.555	341480	14	9485.6
26.3	O94523	O94523	Probable acyl-CoA desaturase	SPCC1281.06c	sp|O94523|ACO1_SCHPO Probable acyl-CoA desaturase OS=Schizosaccharomyces pombe (strain 972 / ATCC 24843) OX=284812 GN=SPCC1281.06c PE=3 SV=1	54.438	196240	6	9344.8
35.7	Q9P7R0	Q9P7R0	Pentafunctional AROM polypeptide;3-dehydroquinate synthase;3-phosphoshikimate 1-carboxyvinyltransferase;Shikimate kinase;3-dehydroquinate dehydratase;Shikimate dehydrogenase	aro1	sp|Q9P7R0|ARO1_SCHPO Pentafunctional AROM polypeptide OS=Schizosaccharomyces pombe (strain 972 / ATCC 24843) OX=284812 GN=aro1 PE=1 SV=1	173.78	743090	20	9288.6
34.2	Q10147	Q10147	Probable T-complex protein 1 subunit beta	cct2	sp|Q10147|TCPB_SCHPO Probable T-complex protein 1 subunit beta OS=Schizosaccharomyces pombe (strain 972 / ATCC 24843) OX=284812 GN=cct2 PE=3 SV=1	56.676	277250	9	9241.5
53.3	Q9P782	Q9P782	Uncharacterized protein C1711.08	SPBC1711.08	sp|Q9P782|YNY8_SCHPO Uncharacterized protein C1711.08 OS=Schizosaccharomyces pombe (strain 972 / ATCC 24843) OX=284812 GN=SPBC1711.08 PE=2 SV=1	37.419	128920	8	9208.7
25.1	O13966	O13966	Aconitate hydratase, mitochondrial	SPAC24C9.06c	sp|O13966|ACON_SCHPO Aconitate hydratase, mitochondrial OS=Schizosaccharomyces pombe (strain 972 / ATCC 24843) OX=284812 GN=SPAC24C9.06c PE=3 SV=2	86.112	303540	11	9198.1
44.6	P22068	P22068	ATP synthase subunit beta, mitochondrial	atp2	sp|P22068|ATPB_SCHPO ATP synthase subunit beta, mitochondrial OS=Schizosaccharomyces pombe (strain 972 / ATCC 24843) OX=284812 GN=atp2 PE=1 SV=1	56.875	237920	9	9150.7
35.1	Q10179	Q10179	Putative glycine--tRNA ligase	grs1	sp|Q10179|SYG_SCHPO Putative glycine--tRNA ligase OS=Schizosaccharomyces pombe (strain 972 / ATCC 24843) OX=284812 GN=grs1 PE=3 SV=1	74.004	317510	12	9071.7
40.8	O60085	O60085	Methionine aminopeptidase 2	fma2	sp|O60085|MAP2_SCHPO Methionine aminopeptidase 2 OS=Schizosaccharomyces pombe (strain 972 / ATCC 24843) OX=284812 GN=fma2 PE=3 SV=1	47.271	188940	6	8997.2
30.9	O14370	O14370	Branched-chain-amino-acid aminotransferase, mitochondrial	eca39	sp|O14370|BCA1_SCHPO Branched-chain-amino-acid aminotransferase, mitochondrial OS=Schizosaccharomyces pombe (strain 972 / ATCC 24843) OX=284812 GN=eca39 PE=1 SV=3	47.855	206170	8	8963.7
44.8	P87144	P87144	Threonine--tRNA ligase, cytoplasmic	ths1	sp|P87144|SYTC_SCHPO Threonine--tRNA ligase, cytoplasmic OS=Schizosaccharomyces pombe (strain 972 / ATCC 24843) OX=284812 GN=ths1 PE=3 SV=1	80.137	358360	14	8959.1
30.6	P24487	P24487	ATP synthase subunit alpha, mitochondrial	atp1	sp|P24487|ATPA_SCHPO ATP synthase subunit alpha, mitochondrial OS=Schizosaccharomyces pombe (strain 972 / ATCC 24843) OX=284812 GN=atp1 PE=3 SV=1	58.587	259740	9	8956.6
41.4	O94319	O94319	Protein transport protein sec13	sec13	sp|O94319|SEC13_SCHPO Protein transport protein sec13 OS=Schizosaccharomyces pombe (strain 972 / ATCC 24843) OX=284812 GN=sec13 PE=1 SV=1	32.568	150880	6	8875.1
44.8	Q09755	Q09755	Putative phospho-2-dehydro-3-deoxyheptonate aldolase	SPAC24H6.10c	sp|Q09755|AROF_SCHPO Putative phospho-2-dehydro-3-deoxyheptonate aldolase OS=Schizosaccharomyces pombe (strain 972 / ATCC 24843) OX=284812 GN=SPAC24H6.10c PE=3 SV=1	39.76	140520	6	8782.6
26.8	P78825	P78825	Adenosine kinase	ado1	sp|P78825|ADK_SCHPO Adenosine kinase OS=Schizosaccharomyces pombe (strain 972 / ATCC 24843) OX=284812 GN=ado1 PE=2 SV=2	36.708	122880	5	8777.2
34.5	P17609	P17609	GTP-binding protein ypt2	ypt2	sp|P17609|YPT2_SCHPO GTP-binding protein ypt2 OS=Schizosaccharomyces pombe (strain 972 / ATCC 24843) OX=284812 GN=ypt2 PE=3 SV=1	22.755	113700	4	8745.8
39	P40373	P40373	ATP phosphoribosyltransferase	his1	sp|P40373|HIS1_SCHPO ATP phosphoribosyltransferase OS=Schizosaccharomyces pombe (strain 972 / ATCC 24843) OX=284812 GN=his1 PE=2 SV=1	34.029	130640	5	8709.4
26.1	P55877	P55877	Eukaryotic translation initiation factor 1A	tif11	sp|P55877|IF1A_SCHPO Eukaryotic translation initiation factor 1A OS=Schizosaccharomyces pombe (strain 972 / ATCC 24843) OX=284812 GN=tif11 PE=2 SV=2	15.677	60830	3	8690
21.7	O14250	O14250	Probable proteasome subunit alpha type-6	SPAC6G10.04c	sp|O14250|PSA6_SCHPO Probable proteasome subunit alpha type-6 OS=Schizosaccharomyces pombe (strain 972 / ATCC 24843) OX=284812 GN=SPAC6G10.04c PE=3 SV=1	30.11	121410	2	8671.8
18.3	Q9UQX0	Q9UQX0	Superoxide dismutase [Mn], mitochondrial	sod2	sp|Q9UQX0|SODM_SCHPO Superoxide dismutase [Mn], mitochondrial OS=Schizosaccharomyces pombe (strain 972 / ATCC 24843) OX=284812 GN=sod2 PE=1 SV=1	24.346	93891	2	8535.6
39.2	Q09736	Q09736	Lanosterol 14-alpha demethylase erg11	erg11	sp|Q09736|CP51_SCHPO Lanosterol 14-alpha demethylase erg11 OS=Schizosaccharomyces pombe (strain 972 / ATCC 24843) OX=284812 GN=erg11 PE=1 SV=1	56.331	187400	8	8518
13	Q10242	Q10242	Probable gluconokinase	SPAC4G9.12	sp|Q10242|GNTK_SCHPO Probable gluconokinase OS=Schizosaccharomyces pombe (strain 972 / ATCC 24843) OX=284812 GN=SPAC4G9.12 PE=3 SV=1	21.648	84751	2	8475.1
57.4	O59743	O59743	Uncharacterized protein C530.07c	SPBC530.07c	sp|O59743|YN27_SCHPO Uncharacterized protein C530.07c OS=Schizosaccharomyces pombe (strain 972 / ATCC 24843) OX=284812 GN=SPBC530.07c PE=4 SV=1	27.839	126250	6	8416.4
16.6	O74135;P40234	O74135	Casein kinase I homolog 3	cki3	sp|O74135|CKI3_SCHPO Casein kinase I homolog 3 OS=Schizosaccharomyces pombe (strain 972 / ATCC 24843) OX=284812 GN=cki3 PE=3 SV=1	50.214	217950	5	8382.7
27.8	P04913	P04913	Histone H2B-alpha	htb1	sp|P04913|H2B1_SCHPO Histone H2B-alpha OS=Schizosaccharomyces pombe (strain 972 / ATCC 24843) OX=284812 GN=htb1 PE=1 SV=3	13.819	58298	2	8328.4
21.1	O60086	O60086	Probable acetolactate synthase small subunit	SPBC14C8.04	sp|O60086|ILV6_SCHPO Probable acetolactate synthase small subunit OS=Schizosaccharomyces pombe (strain 972 / ATCC 24843) OX=284812 GN=SPBC14C8.04 PE=1 SV=2	31.834	141200	4	8305.7
33.3	O60163	O60163	Probable aspartokinase	SPBC19F5.04	sp|O60163|AK_SCHPO Probable aspartokinase OS=Schizosaccharomyces pombe (strain 972 / ATCC 24843) OX=284812 GN=SPBC19F5.04 PE=1 SV=1	56.812	232050	7	8287.4
50	P79083	P79083	Eukaryotic translation initiation factor 3 subunit I	sum1	sp|P79083|EIF3I_SCHPO Eukaryotic translation initiation factor 3 subunit I OS=Schizosaccharomyces pombe (strain 972 / ATCC 24843) OX=284812 GN=sum1 PE=1 SV=1	36.811	173750	8	8273.9
26.9	Q10066;P37818	Q10066	Arginase	aru1	sp|Q10066|ARGI2_SCHPO Arginase OS=Schizosaccharomyces pombe (strain 972 / ATCC 24843) OX=284812 GN=aru1 PE=3 SV=1	35.703	123660	4	8244
0.5	O60179	O60179	U3 small nucleolar RNA-associated protein 10	utp10	sp|O60179|UTP10_SCHPO U3 small nucleolar RNA-associated protein 10 OS=Schizosaccharomyces pombe (strain 972 / ATCC 24843) OX=284812 GN=utp10 PE=3 SV=1	186.41	681230	1	8109.8
14.9	O13665	O13665	Factor arrest protein 11	far11	sp|O13665|FAR11_SCHPO Factor arrest protein 11 OS=Schizosaccharomyces pombe (strain 972 / ATCC 24843) OX=284812 GN=far11 PE=1 SV=1	95.092	337340	8	8031.9
36.2	Q09173	Q09173	Protein phosphatase 2C homolog 3	ptc3	sp|Q09173|PP2C3_SCHPO Protein phosphatase 2C homolog 3 OS=Schizosaccharomyces pombe (strain 972 / ATCC 24843) OX=284812 GN=ptc3 PE=3 SV=1	44.856	207940	8	7997.8
30.1	Q9Y7Y8	Q9Y7Y8	Probable glutamine--tRNA ligase	qrs1	sp|Q9Y7Y8|SYQ_SCHPO Probable glutamine--tRNA ligase OS=Schizosaccharomyces pombe (strain 972 / ATCC 24843) OX=284812 GN=qrs1 PE=3 SV=1	92.072	422080	20	7963.8
48.9	O14104	O14104	Homoisocitrate dehydrogenase	lys12	sp|O14104|LYS12_SCHPO Homoisocitrate dehydrogenase OS=Schizosaccharomyces pombe (strain 972 / ATCC 24843) OX=284812 GN=lys12 PE=1 SV=1	39.256	159050	11	7952.5
73.4	O74983	O74983	Ubiquitin-conjugating enzyme spm2	spm2	sp|O74983|MMS2_SCHPO Ubiquitin-conjugating enzyme spm2 OS=Schizosaccharomyces pombe (strain 972 / ATCC 24843) OX=284812 GN=spm2 PE=1 SV=1	15.554	47476	4	7912.7
29	Q10298	Q10298	Putative serine/threonine-protein phosphatase C22H10.04	SPAC22H10.04	sp|Q10298|YD44_SCHPO Putative serine/threonine-protein phosphatase C22H10.04 OS=Schizosaccharomyces pombe (strain 972 / ATCC 24843) OX=284812 GN=SPAC22H10.04 PE=3 SV=1	35.178	125610	4	7850.5
30.3	O14295	O14295	Pyridoxal reductase	plr1	sp|O14295|PLR1_SCHPO Pyridoxal reductase OS=Schizosaccharomyces pombe (strain 972 / ATCC 24843) OX=284812 GN=plr1 PE=1 SV=1	36.814	148290	7	7804.6
25.8	Q9P6K7	Q9P6K7	tRNA-aminoacylation cofactor arc1	SPAC30C2.04	sp|Q9P6K7|ARC1_SCHPO tRNA-aminoacylation cofactor arc1 OS=Schizosaccharomyces pombe (strain 972 / ATCC 24843) OX=284812 GN=SPAC30C2.04 PE=3 SV=1	50.606	194900	6	7795.9
38.4	O13914	O13914	Alanine--tRNA ligase	ala1	sp|O13914|SYA_SCHPO Alanine--tRNA ligase OS=Schizosaccharomyces pombe (strain 972 / ATCC 24843) OX=284812 GN=ala1 PE=1 SV=1	107.38	428660	16	7793.9
18.4	O13846	O13846	Ceramide very long chain fatty acid hydroxylase-like protein C19G12.08	SPAC19G12.08	sp|O13846|SCS7_SCHPO Ceramide very long chain fatty acid hydroxylase scs7 OS=Schizosaccharomyces pombe (strain 972 / ATCC 24843) OX=284812 GN=scs7 PE=3 SV=1	40.229	108540	2	7752.6
38	O13848	O13848	NAD/NADP-dependent indole-3-acetaldehyde reductase	SPAC19G12.09	sp|O13848|I3ACR_SCHPO NAD/NADP-dependent indole-3-acetaldehyde reductase OS=Schizosaccharomyces pombe (strain 972 / ATCC 24843) OX=284812 GN=SPAC19G12.09 PE=1 SV=1	31.569	135870	7	7548.3
28.8	P40976	P40976	L-aminoadipate-semialdehyde dehydrogenase	lys1	sp|P40976|LYS2_SCHPO L-2-aminoadipate reductase OS=Schizosaccharomyces pombe (strain 972 / ATCC 24843) OX=284812 GN=lys1 PE=1 SV=3	156.89	560970	18	7479.6
17.5	O14100	O14100	Protein zds1	zds1	sp|O14100|ZDS1_SCHPO Protein zds1 OS=Schizosaccharomyces pombe (strain 972 / ATCC 24843) OX=284812 GN=zds1 PE=1 SV=2	103.1	351090	12	7470
53.3	O74548	O74548	Probable acetylornithine aminotransferase, mitochondrial	arg1	sp|O74548|ARGD_SCHPO Probable acetylornithine aminotransferase, mitochondrial OS=Schizosaccharomyces pombe (strain 972 / ATCC 24843) OX=284812 GN=arg1 PE=2 SV=1	47.509	198610	7	7355.8
14.7	Q9UU78	Q9UU78	60S acidic ribosomal protein P1-alpha 5	rpa5	sp|Q9UU78|RLA5_SCHPO 60S acidic ribosomal protein P1-alpha 5 OS=Schizosaccharomyces pombe (strain 972 / ATCC 24843) OX=284812 GN=rpp103 PE=1 SV=1	11.216	21643	1	7214.3
65.4	O94715	O94715	40S ribosomal protein S15-A	rps15a	sp|O94715|RS15A_SCHPO 40S ribosomal protein S15-A OS=Schizosaccharomyces pombe (strain 972 / ATCC 24843) OX=284812 GN=rps1501 PE=3 SV=1	17.519	57124	4	7140.5
38.2	O13792	O13792	ATP-dependent RNA helicase uap56	uap56	sp|O13792|SUB2_SCHPO ATP-dependent RNA helicase uap56 OS=Schizosaccharomyces pombe (strain 972 / ATCC 24843) OX=284812 GN=uap56 PE=1 SV=3	49.231	128040	6	7113.3
19.4	G2TRQ6	G2TRQ6	Uncharacterized protein tam11	tam11	sp|G2TRQ6|TAM11_SCHPO Uncharacterized protein tam11 OS=Schizosaccharomyces pombe (strain 972 / ATCC 24843) OX=284812 GN=tam11 PE=1 SV=1	6.9346	28378	1	7094.5
49.8	Q02787	Q02787	Adenylosuccinate synthetase	ade2	sp|Q02787|PURA_SCHPO Adenylosuccinate synthetase OS=Schizosaccharomyces pombe (strain 972 / ATCC 24843) OX=284812 GN=ade2 PE=1 SV=2	47.876	155490	5	7067.8
13	O74989	O74989	Uncharacterized protein C338.12	SPCC338.12	sp|O74989|YJZC_SCHPO Uncharacterized protein C338.12 OS=Schizosaccharomyces pombe (strain 972 / ATCC 24843) OX=284812 GN=SPCC338.12 PE=3 SV=1	8.5515	27972	1	6993
5.5	P17608	P17608	GTP-binding protein ryh1	ryh1	sp|P17608|RYH1_SCHPO GTP-binding protein ryh1 OS=Schizosaccharomyces pombe (strain 972 / ATCC 24843) OX=284812 GN=ryh1 PE=1 SV=1	23.136	69838	1	6983.8
56.3	P09322	P09322	Histone H4	hhf1	sp|P09322|H4_SCHPO Histone H4 OS=Schizosaccharomyces pombe (strain 972 / ATCC 24843) OX=284812 GN=hhf1 PE=1 SV=2	11.423	40882	2	6813.7
11.6	Q9USH7	Q9USH7	Syntaxin-like protein psy1	psy1	sp|Q9USH7|PSY1_SCHPO Syntaxin-like protein psy1 OS=Schizosaccharomyces pombe (strain 972 / ATCC 24843) OX=284812 GN=psy1 PE=3 SV=1	32.55	95153	2	6796.6
33.8	Q9UQY2	Q9UQY2	Probable proteasome subunit beta type-6	pam1	sp|Q9UQY2|PSB6_SCHPO Probable proteasome subunit beta type-6 OS=Schizosaccharomyces pombe (strain 972 / ATCC 24843) OX=284812 GN=pam1 PE=3 SV=1	25.082	59802	4	6644.7
11.2	P59289;P05733	P59289;P05733	60S ribosomal protein L37-A;60S ribosomal protein L37-B	rpl37a;rpl37b	sp|P59289|RL37A_SCHPO 60S ribosomal protein L37-A OS=Schizosaccharomyces pombe (strain 972 / ATCC 24843) OX=284812 GN=rpl3703 PE=1 SV=2;sp|P05733|RL37B_SCHPO 60S ribosomal protein L37-B OS=Schizosaccharomyces pombe (strain 972 / ATCC 24843) OX=284812 GN=rp	9.9605	26508	1	6627
2	Q9C0Y2	Q9C0Y2	Putative cell agglutination protein PB2C8.01	SPAPB2C8.01	sp|Q9C0Y2|YKL1_SCHPO Putative cell agglutination protein SPAPB2C8.01 OS=Schizosaccharomyces pombe (strain 972 / ATCC 24843) OX=284812 GN=SPAPB2C8.01 PE=3 SV=1	124.08	52714	1	6589.2
28.7	Q9C102	Q9C102	Putative glutamate synthase [NADPH]	glt1	sp|Q9C102|GLT1_SCHPO Glutamate synthase [NADH] OS=Schizosaccharomyces pombe (strain 972 / ATCC 24843) OX=284812 GN=glt1 PE=1 SV=1	232.85	704420	30	6583.4
15	Q09912	Q09912	Protein psi1	psi1	sp|Q09912|PSI1_SCHPO Protein psi1 OS=Schizosaccharomyces pombe (strain 972 / ATCC 24843) OX=284812 GN=psi1 PE=2 SV=2	40.259	118370	3	6576.2
36.1	Q9USG6	Q9USG6	60S ribosomal protein L33-B	rpl33b	sp|Q9USG6|RL33B_SCHPO 60S ribosomal protein L33-B OS=Schizosaccharomyces pombe (strain 972 / ATCC 24843) OX=284812 GN=rpl35a PE=1 SV=1	12.108	59031	3	6559.1
30.1	O94671	O94671	Probable homoserine dehydrogenase	SPBC776.03	sp|O94671|DHOM_SCHPO Probable homoserine dehydrogenase OS=Schizosaccharomyces pombe (strain 972 / ATCC 24843) OX=284812 GN=SPBC776.03 PE=1 SV=1	40.037	131140	6	6557.2
21.3	Q9P7S7	Q9P7S7	Nucleolar protein 58	nop58	sp|Q9P7S7|NOP58_SCHPO Nucleolar protein 58 OS=Schizosaccharomyces pombe (strain 972 / ATCC 24843) OX=284812 GN=nop58 PE=1 SV=1	55.758	169230	2	6508.9
31.2	Q9P7T6	Q9P7T6	UPF0160 protein C694.04c	SPAC694.04c	sp|Q9P7T6|YIW4_SCHPO MYG1 protein C694.04c OS=Schizosaccharomyces pombe (strain 972 / ATCC 24843) OX=284812 GN=SPAC694.04c PE=3 SV=1	36.672	129820	6	6491.2
28.9	Q11004	Q11004	40 kDa peptidyl-prolyl cis-trans isomerase	wis2	sp|Q11004|PPID_SCHPO 40 kDa peptidyl-prolyl cis-trans isomerase OS=Schizosaccharomyces pombe (strain 972 / ATCC 24843) OX=284812 GN=wis2 PE=2 SV=1	40.161	123090	4	6478.5
38.3	Q09184	Q09184	Curved DNA-binding protein	cdb4	sp|Q09184|CDB4_SCHPO Curved DNA-binding protein OS=Schizosaccharomyces pombe (strain 972 / ATCC 24843) OX=284812 GN=cdb4 PE=1 SV=1	41.597	135740	7	6464
26.6	A9ZLL8	A9ZLL8	Protein lsd90	lsd90	sp|A9ZLL8|LSD90_SCHPO Protein lsd90 OS=Schizosaccharomyces pombe (strain 972 / ATCC 24843) OX=284812 GN=lsd90 PE=1 SV=1	82.323	295510	12	6424.1
33.3	P36620	P36620	Acetolactate synthase, mitochondrial	ilv1	sp|P36620|ILVB_SCHPO Acetolactate synthase, mitochondrial OS=Schizosaccharomyces pombe (strain 972 / ATCC 24843) OX=284812 GN=ilv1 PE=3 SV=2	73.193	242890	8	6391.8
18	P79063	P79063	Eukaryotic peptide chain release factor subunit 1	sup45	sp|P79063|ERF1_SCHPO Eukaryotic peptide chain release factor subunit 1 OS=Schizosaccharomyces pombe (strain 972 / ATCC 24843) OX=284812 GN=sup45 PE=1 SV=1	48.803	152680	4	6361.7
21	Q9UUE3	Q9UUE3	Putative lysine N-acyltransferase C17G9.06c	SPBC17G9.06c	sp|Q9UUE3|YNZ6_SCHPO Putative lysine N-acyltransferase C17G9.06c OS=Schizosaccharomyces pombe (strain 972 / ATCC 24843) OX=284812 GN=SPBC17G9.06c PE=3 SV=1	39.775	95257	4	6350.4
34.4	O14018	O14018	Serine--tRNA ligase, cytoplasmic	SPAC29A4.15	sp|O14018|SYSC_SCHPO Serine--tRNA ligase, cytoplasmic OS=Schizosaccharomyces pombe (strain 972 / ATCC 24843) OX=284812 GN=SPAC29A4.15 PE=3 SV=1	51.642	183140	8	6315.1
22.9	O14055	O14055	Tyrosine--tRNA ligase, cytoplasmic	tys1	sp|O14055|SYYC_SCHPO Tyrosine--tRNA ligase, cytoplasmic OS=Schizosaccharomyces pombe (strain 972 / ATCC 24843) OX=284812 GN=tys1 PE=3 SV=1	44.575	160310	4	6165.9
27.1	Q09794	Q09794	Protein ura1;Glutamine-dependent carbamoyl-phosphate synthase;Aspartate carbamoyltransferase	ura1	sp|Q09794|PYR1_SCHPO Protein ura1 OS=Schizosaccharomyces pombe (strain 972 / ATCC 24843) OX=284812 GN=ura1 PE=1 SV=1	248.31	676280	29	6148
43.3	O42652	O42652	Aspartate aminotransferase, cytoplasmic	aat2	sp|O42652|AATC_SCHPO Aspartate aminotransferase, cytoplasmic OS=Schizosaccharomyces pombe (strain 972 / ATCC 24843) OX=284812 GN=aat2 PE=1 SV=1	46.14	145240	7	6051.5
32.6	O14254	O14254	Probable isocitrate dehydrogenase [NADP], mitochondrial	idp1	sp|O14254|IDHP_SCHPO Probable isocitrate dehydrogenase [NADP], mitochondrial OS=Schizosaccharomyces pombe (strain 972 / ATCC 24843) OX=284812 GN=idp1 PE=3 SV=2	49.478	151110	6	6044.4
50.5	P30821	P30821	P25 protein	obr1	sp|P30821|P25_SCHPO P25 protein OS=Schizosaccharomyces pombe (strain 972 / ATCC 24843) OX=284812 GN=obr1 PE=1 SV=1	21.898	48224	2	6028
27.3	O59770	O59770	Probable proteasome subunit alpha type-7	pre10	sp|O59770|PSA7_SCHPO Probable proteasome subunit alpha type-7 OS=Schizosaccharomyces pombe (strain 972 / ATCC 24843) OX=284812 GN=pre10 PE=1 SV=1	28.031	66120	2	6010.9
27.1	O94413	O94413	Ribose-phosphate pyrophosphokinase 2	SPCC1620.06c	sp|O94413|KPR2_SCHPO Ribose-phosphate pyrophosphokinase 2 OS=Schizosaccharomyces pombe (strain 972 / ATCC 24843) OX=284812 GN=SPCC1620.06c PE=1 SV=1	34.779	100690	5	5923.1
34.2	Q9HFE4	Q9HFE4	Thiol-specific monooxygenase	fmo1	sp|Q9HFE4|FMO1_SCHPO Thiol-specific monooxygenase OS=Schizosaccharomyces pombe (strain 972 / ATCC 24843) OX=284812 GN=fmo1 PE=1 SV=1	49.889	147640	5	5905.6
40.5	Q9P7D2	Q9P7D2	Protein phosphatase methylesterase 1	ppe1	sp|Q9P7D2|PPME1_SCHPO Protein phosphatase methylesterase 1 OS=Schizosaccharomyces pombe (strain 972 / ATCC 24843) OX=284812 GN=ppe1 PE=3 SV=1	38.092	99302	8	5841.3
38.9	O74455	O74455	Probable 6-phosphogluconolactonase	SPCC16C4.10	sp|O74455|6PGL_SCHPO Probable 6-phosphogluconolactonase OS=Schizosaccharomyces pombe (strain 972 / ATCC 24843) OX=284812 GN=SPCC16C4.10 PE=3 SV=1	28.351	80438	4	5745.6
23.9	Q9P7D7	Q9P7D7	Long-chain-fatty-acid--CoA ligase 2	lcf2	sp|Q9P7D7|LCF2_SCHPO Long-chain-fatty-acid--CoA ligase 2 OS=Schizosaccharomyces pombe (strain 972 / ATCC 24843) OX=284812 GN=lcf2 PE=3 SV=1	75.79	183010	9	5719
42	O14008	O14008	Myosin 1 light chain cam2	cam2	sp|O14008|CAM2_SCHPO Myosin 1 light chain cam2 OS=Schizosaccharomyces pombe (strain 972 / ATCC 24843) OX=284812 GN=cam2 PE=1 SV=1	16.218	51379	3	5708.8
41.5	O60105	O60105	Adenylosuccinate lyase	ade8	sp|O60105|PUR8_SCHPO Adenylosuccinate lyase OS=Schizosaccharomyces pombe (strain 972 / ATCC 24843) OX=284812 GN=ade8 PE=3 SV=1	54.307	147820	4	5685.4
13.7	Q9Y7T8	Q9Y7T8	Probable proteasome subunit beta type-3	pup3	sp|Q9Y7T8|PSB3_SCHPO Probable proteasome subunit beta type-3 OS=Schizosaccharomyces pombe (strain 972 / ATCC 24843) OX=284812 GN=pup3 PE=3 SV=1	22.661	39132	1	5590.3
30.8	O74760	O74760	Eukaryotic translation initiation factor 3 subunit A	tif32	sp|O74760|EIF3A_SCHPO Eukaryotic translation initiation factor 3 subunit A OS=Schizosaccharomyces pombe (strain 972 / ATCC 24843) OX=284812 GN=tif32 PE=1 SV=1	107.07	304590	14	5538
33.7	P78774	P78774	Actin-related protein 2/3 complex subunit 1	arc1	sp|P78774|ARPC1_SCHPO Actin-related protein 2/3 complex subunit 1 OS=Schizosaccharomyces pombe (strain 972 / ATCC 24843) OX=284812 GN=arc1 PE=1 SV=3	41.596	110410	4	5520.5
31.9	O13797	O13797	Small glutamine-rich tetratricopeptide repeat-containing protein 2	sgt2	sp|O13797|SGT2_SCHPO Small glutamine-rich tetratricopeptide repeat-containing protein 2 OS=Schizosaccharomyces pombe (strain 972 / ATCC 24843) OX=284812 GN=sgt2 PE=3 SV=1	34.001	86875	5	5429.7
29.1	Q9P544	Q9P544	Probable mitochondrial outer membrane protein porin	SPAC1635.01	sp|Q9P544|VDAC_SCHPO Probable mitochondrial outer membrane protein porin OS=Schizosaccharomyces pombe (strain 972 / ATCC 24843) OX=284812 GN=SPAC1635.01 PE=3 SV=1	29.653	75641	3	5402.9
34.3	Q9UUF2	Q9UUF2	Probable methionine--tRNA ligase, cytoplasmic	rar1	sp|Q9UUF2|SYMC_SCHPO Probable methionine--tRNA ligase, cytoplasmic OS=Schizosaccharomyces pombe (strain 972 / ATCC 24843) OX=284812 GN=rar1 PE=3 SV=1	88.88	229380	11	5334.3
31.2	P78795	P78795	Eukaryotic translation initiation factor 3 subunit G	tif35	sp|P78795|EIF3G_SCHPO Eukaryotic translation initiation factor 3 subunit G OS=Schizosaccharomyces pombe (strain 972 / ATCC 24843) OX=284812 GN=tif35 PE=1 SV=2	31.494	79929	4	5328.6
27.7	O94303	O94303	Imidazole glycerol phosphate synthase hisHF;Glutamine amidotransferase;Cyclase	his4	sp|O94303|HIS5_SCHPO Imidazole glycerol phosphate synthase hisHF OS=Schizosaccharomyces pombe (strain 972 / ATCC 24843) OX=284812 GN=his4 PE=3 SV=3	59.399	180830	7	5318.7
43.1	P58234	P58234	40S ribosomal protein S19-A	rps19a	sp|P58234|RS19A_SCHPO 40S ribosomal protein S19-A OS=Schizosaccharomyces pombe (strain 972 / ATCC 24843) OX=284812 GN=rps1901 PE=2 SV=1	16.15	47862	1	5318
21.9	O94236	O94236	Eukaryotic translation initiation factor 3 subunit D	moe1	sp|O94236|EIF3D_SCHPO Eukaryotic translation initiation factor 3 subunit D OS=Schizosaccharomyces pombe (strain 972 / ATCC 24843) OX=284812 GN=moe1 PE=1 SV=1	62.635	159530	5	5317.8
22.8	Q9P7V8	Q9P7V8	Probable mitochondrial phosphate carrier protein	SPBC1703.13c	sp|Q9P7V8|MPCP_SCHPO Probable mitochondrial phosphate carrier protein OS=Schizosaccharomyces pombe (strain 972 / ATCC 24843) OX=284812 GN=SPBC1703.13c PE=3 SV=1	33.843	84438	3	5277.4
27.6	P17610	P17610	GTP-binding protein ypt3	ypt3	sp|P17610|YPT3_SCHPO GTP-binding protein ypt3 OS=Schizosaccharomyces pombe (strain 972 / ATCC 24843) OX=284812 GN=ypt3 PE=1 SV=1	23.861	63294	2	5274.5
40.3	O42870	O42870	Phenylalanine--tRNA ligase alpha subunit	frs2	sp|O42870|SYFA_SCHPO Phenylalanine--tRNA ligase alpha subunit OS=Schizosaccharomyces pombe (strain 972 / ATCC 24843) OX=284812 GN=frs2 PE=3 SV=3	56.266	147360	9	5262.9
30.6	O94461	O94461	Probable phosphatase C1687.21		sp|O94461|YFFL_SCHPO Probable phosphatase C1687.21 OS=Schizosaccharomyces pombe (strain 972 / ATCC 24843) OX=284812 GN=SPAC1687.21 PE=3 SV=1	23.698	52442	2	5244.2
40.9	Q09674	Q09674	UPF0317 protein C5H10.01	SPAC5H10.01	sp|Q09674|YA01_SCHPO Putative hydro-lyase C5H10.01 OS=Schizosaccharomyces pombe (strain 972 / ATCC 24843) OX=284812 GN=SPAC5H10.01 PE=3 SV=1	33.756	73027	2	5216.2
22.5	Q09692	Q09692	Tryptophan--tRNA ligase, cytoplasmic	wrs1	sp|Q09692|SYWC_SCHPO Tryptophan--tRNA ligase, cytoplasmic OS=Schizosaccharomyces pombe (strain 972 / ATCC 24843) OX=284812 GN=wrs1 PE=1 SV=1	44.91	130130	5	5205.3
31.1	O13923	O13923	Coronin-like protein crn1	crn1	sp|O13923|CORO_SCHPO Coronin-like protein crn1 OS=Schizosaccharomyces pombe (strain 972 / ATCC 24843) OX=284812 GN=crn1 PE=1 SV=1	67.015	162220	10	5069.5
19.6	P05767	P05767	60S ribosomal protein L39	rpl39	sp|P05767|RL39_SCHPO 60S ribosomal protein L39 OS=Schizosaccharomyces pombe (strain 972 / ATCC 24843) OX=284812 GN=rpl39 PE=3 SV=3	6.3084	10113	1	5056.5
11.2	Q9HDV9	Q9HDV9	Putative glycine cleavage system H protein, mitochondrial	gcv3	sp|Q9HDV9|GCSH_SCHPO Putative glycine cleavage system H protein, mitochondrial OS=Schizosaccharomyces pombe (strain 972 / ATCC 24843) OX=284812 GN=gcv3 PE=1 SV=1	18.017	30325	1	5054.1
51.4	P00046	P00046	Cytochrome c	cyc1	sp|P00046|CYC_SCHPO Cytochrome c OS=Schizosaccharomyces pombe (strain 972 / ATCC 24843) OX=284812 GN=cyc1 PE=1 SV=3	12.021	35335	1	5047.9
20.7	O42896	O42896	Uncharacterized oxidoreductase C115.03		sp|O42896|YBQ3_SCHPO Uncharacterized oxidoreductase C115.03 OS=Schizosaccharomyces pombe (strain 972 / ATCC 24843) OX=284812 GN=SPBC115.03 PE=3 SV=1	41.271	110900	4	5041.1
36.5	Q9USR7	Q9USR7	60S ribosomal protein L38-1	rpl38a	sp|Q9USR7|RL38A_SCHPO 60S ribosomal protein L38-1 OS=Schizosaccharomyces pombe (strain 972 / ATCC 24843) OX=284812 GN=rpl3801 PE=3 SV=1	8.4919	15025	3	5008.2
35.8	G2TRQ0	G2TRQ0	Uncharacterized protein tam13	tam13	sp|G2TRQ0|TAM13_SCHPO Uncharacterized protein tam13 OS=Schizosaccharomyces pombe (strain 972 / ATCC 24843) OX=284812 GN=tam13 PE=2 SV=1	10.171	24724	2	4944.8
32.9	O74557	O74557	NADH-cytochrome b5 reductase 1	cbr1	sp|O74557|NCB5R_SCHPO NADH-cytochrome b5 reductase 1 OS=Schizosaccharomyces pombe (strain 972 / ATCC 24843) OX=284812 GN=cbr1 PE=3 SV=1	33.723	88342	4	4907.9
38.7	Q9P3W6	Q9P3W6	Uncharacterized protein C458.02c	SPAC458.02c	sp|Q9P3W6|YLI2_SCHPO Uncharacterized protein C458.02c OS=Schizosaccharomyces pombe (strain 972 / ATCC 24843) OX=284812 GN=SPAC458.02c PE=1 SV=1	53.735	126700	5	4873
9.9	P78831	P78831	High-affinity glucose transporter ght5	ght5	sp|P78831|GHT5_SCHPO High-affinity glucose transporter ght5 OS=Schizosaccharomyces pombe (strain 972 / ATCC 24843) OX=284812 GN=ght5 PE=1 SV=2	60.32	77568	3	4848
1.1	O13705	O13705	Exocyst complex component sec10	sec10	sp|O13705|SEC10_SCHPO Exocyst complex component sec10 OS=Schizosaccharomyces pombe (strain 972 / ATCC 24843) OX=284812 GN=sec10 PE=1 SV=2	92.515	217530	1	4834
15.3	Q9P6I2	Q9P6I2	Cys-Gly metallodipeptidase dug1	dug1	sp|Q9P6I2|DUG1_SCHPO Cys-Gly metallodipeptidase dug1 OS=Schizosaccharomyces pombe (strain 972 / ATCC 24843) OX=284812 GN=dug1 PE=2 SV=2	52.84	91509	4	4816.3
27	O43021	O43021	Oxysterol-binding protein homolog C354.07c	SPBC354.07c	sp|O43021|YGV7_SCHPO Oxysterol-binding protein homolog C354.07c OS=Schizosaccharomyces pombe (strain 972 / ATCC 24843) OX=284812 GN=SPBC354.07c PE=3 SV=4	45.066	71991	5	4799.4
37.1	Q10329	Q10329	Probable proteasome subunit alpha type-4	pre6	sp|Q10329|PSA4_SCHPO Probable proteasome subunit alpha type-4 OS=Schizosaccharomyces pombe (strain 972 / ATCC 24843) OX=284812 GN=pre6 PE=3 SV=1	28.277	66689	4	4763.5
34.5	O43063	O43063	Probable proteasome subunit beta type-1	pre3	sp|O43063|PSB1_SCHPO Probable proteasome subunit beta type-1 OS=Schizosaccharomyces pombe (strain 972 / ATCC 24843) OX=284812 GN=pre3 PE=3 SV=1	24.564	70835	4	4722.3
17.3	O74388	O74388	Uncharacterized protein C3H7.13	SPBC3H7.13	sp|O74388|YNVD_SCHPO Uncharacterized protein C3H7.13 OS=Schizosaccharomyces pombe (strain 972 / ATCC 24843) OX=284812 GN=SPBC3H7.13 PE=1 SV=1	33.904	83791	3	4655.1
39.3	P04688	P04688	Tubulin alpha-1 chain	nda2	sp|P04688|TBA1_SCHPO Tubulin alpha-1 chain OS=Schizosaccharomyces pombe (strain 972 / ATCC 24843) OX=284812 GN=nda2 PE=1 SV=2	51.152	97173	11	4627.3
21.1	O14241	O14241	Actin-related protein 2/3 complex subunit 2	arc2	sp|O14241|ARPC2_SCHPO Actin-related protein 2/3 complex subunit 2 OS=Schizosaccharomyces pombe (strain 972 / ATCC 24843) OX=284812 GN=arc2 PE=1 SV=1	36.974	91010	4	4550.5
20.9	O13784	O13784	40S ribosomal protein S24-A	rps24a	sp|O13784|RS24A_SCHPO 40S ribosomal protein S24-A OS=Schizosaccharomyces pombe (strain 972 / ATCC 24843) OX=284812 GN=rps2401 PE=3 SV=3	15.47	27146	4	4524.3
5.9	O42842	O42842	Adenine phosphoribosyltransferase	apt1	sp|O42842|APT_SCHPO Adenine phosphoribosyltransferase OS=Schizosaccharomyces pombe (strain 972 / ATCC 24843) OX=284812 GN=apt1 PE=3 SV=1	20.746	45209	1	4520.9
27.6	O94582	O94582	Probable anthranilate synthase component 1	trp3	sp|O94582|TRPE_SCHPO Probable anthranilate synthase component 1 OS=Schizosaccharomyces pombe (strain 972 / ATCC 24843) OX=284812 GN=trp3 PE=1 SV=1	54.959	126130	7	4504.7
11.3	P23566	P23566	Ubiquitin-conjugating enzyme E2 2	rhp6	sp|P23566|UBC2_SCHPO Ubiquitin-conjugating enzyme E2 2 OS=Schizosaccharomyces pombe (strain 972 / ATCC 24843) OX=284812 GN=rhp6 PE=1 SV=3	17.097	13514	1	4504.7
9.1	Q9P3U7;Q9P3U6	Q9P3U7	Probable high-affinity hexose transporter ght8, mitochondrial	ght8	sp|Q9P3U7|GHT8_SCHPO Probable high-affinity hexose transporter ght8, mitochondrial OS=Schizosaccharomyces pombe (strain 972 / ATCC 24843) OX=284812 GN=ght8 PE=1 SV=1	60.176	75645	3	4449.7
26.9	O74407	O74407	Aspartate--tRNA ligase, cytoplasmic	dps1	sp|O74407|SYDC_SCHPO Aspartate--tRNA ligase, cytoplasmic OS=Schizosaccharomyces pombe (strain 972 / ATCC 24843) OX=284812 GN=dps1 PE=1 SV=1	66.67	139330	3	4354.1
33.2	Q09130	Q09130	Eukaryotic translation initiation factor 2 subunit gamma	tif213	sp|Q09130|IF2G_SCHPO Eukaryotic translation initiation factor 2 subunit gamma OS=Schizosaccharomyces pombe (strain 972 / ATCC 24843) OX=284812 GN=tif213 PE=2 SV=1	48.78	91416	5	4353.1
23.8	Q10057	Q10057	Putative protein disulfide-isomerase C1F5.02	SPAC1F5.02	sp|Q10057|PDI1_SCHPO Putative protein disulfide-isomerase C1F5.02 OS=Schizosaccharomyces pombe (strain 972 / ATCC 24843) OX=284812 GN=SPAC1F5.02 PE=3 SV=1	54.88	120540	4	4304.9
17.9	P78954	P78954	Eukaryotic translation initiation factor 4E-1	tif451	sp|P78954|IF4E1_SCHPO Eukaryotic translation initiation factor 4E-1 OS=Schizosaccharomyces pombe (strain 972 / ATCC 24843) OX=284812 GN=tif451 PE=3 SV=1	24.958	38411	2	4267.9
30.7	Q10334	Q10334	Putative alanine aminotransferase	SPBC582.08	sp|Q10334|ALAT_SCHPO Putative alanine aminotransferase OS=Schizosaccharomyces pombe (strain 972 / ATCC 24843) OX=284812 GN=SPBC582.08 PE=3 SV=1	56.627	98016	4	4261.6
25.1	Q9Y6Z9	Q9Y6Z9	Sorbose reductase sou1	sou1	sp|Q9Y6Z9|SOU1_SCHPO Sorbose reductase sou1 OS=Schizosaccharomyces pombe (strain 972 / ATCC 24843) OX=284812 GN=sou1 PE=3 SV=1	27.437	54797	2	4215.2
26.7	O59797	O59797	Putative nucleosome assembly protein C364.06	SPCC364.06	sp|O59797|YCO6_SCHPO Putative nucleosome assembly protein C364.06 OS=Schizosaccharomyces pombe (strain 972 / ATCC 24843) OX=284812 GN=SPCC364.06 PE=1 SV=1	44.347	67378	4	4211.1
10.6	P87128	P87128	Probable eukaryotic translation initiation factor 3 subunit J	SPAC3A12.13c	sp|P87128|EIF3J_SCHPO Probable eukaryotic translation initiation factor 3 subunit J OS=Schizosaccharomyces pombe (strain 972 / ATCC 24843) OX=284812 GN=SPAC3A12.13c PE=1 SV=2	30.532	67340	2	4208.8
36.4	O74341	O74341	T-complex protein 1 subunit gamma	cct3	sp|O74341|TCPG_SCHPO T-complex protein 1 subunit gamma OS=Schizosaccharomyces pombe (strain 972 / ATCC 24843) OX=284812 GN=cct3 PE=1 SV=1	58.48	143060	7	4207.6
10.6	Q10100	Q10100	Nuclear transport factor 2	ntf2	sp|Q10100|NTF2_SCHPO Nuclear transport factor 2 OS=Schizosaccharomyces pombe (strain 972 / ATCC 24843) OX=284812 GN=ntf2 PE=3 SV=2	14.078	20991	1	4198.2
28.5	O74374	O74374	Phosphoglucomutase	SPBC32F12.10	sp|O74374|PGM_SCHPO Phosphoglucomutase OS=Schizosaccharomyces pombe (strain 972 / ATCC 24843) OX=284812 GN=SPBC32F12.10 PE=1 SV=1	60.598	130010	7	4193.7
19.2	O42999	O42999	Mitochondrial import receptor subunit tom7	tom7	sp|O42999|TOM7_SCHPO Mitochondrial import receptor subunit tom7 OS=Schizosaccharomyces pombe (strain 972 / ATCC 24843) OX=284812 GN=tom7 PE=3 SV=2	6.0391	8291.1	1	4145.5
8.1	P10651;P09988	P10651;P09988	Histone H3.3;Histone H3.1/H3.2	hht3;hht1	sp|P10651|H33_SCHPO Histone H3.3 OS=Schizosaccharomyces pombe (strain 972 / ATCC 24843) OX=284812 GN=hht3 PE=1 SV=2;sp|P09988|H31_SCHPO Histone H3.1/H3.2 OS=Schizosaccharomyces pombe (strain 972 / ATCC 24843) OX=284812 GN=hht1 PE=1 SV=2	15.397	16579	1	4144.6
3.9	O13899	O13899	Uncharacterized CDP-alcohol phosphatidyltransferase class-I family protein C22A12.08c	SPAC22A12.08c	sp|O13899|YF38_SCHPO Uncharacterized CDP-alcohol phosphatidyltransferase class-I family protein C22A12.08c OS=Schizosaccharomyces pombe (strain 972 / ATCC 24843) OX=284812 GN=SPAC22A12.08c PE=3 SV=1	63.879	132530	1	4141.6
39.6	Q10192	Q10192	60S ribosomal protein L18-A	rpl18a	sp|Q10192|RL18A_SCHPO 60S ribosomal protein L18-A OS=Schizosaccharomyces pombe (strain 972 / ATCC 24843) OX=284812 GN=rpl1801 PE=1 SV=1	21.19	41259	5	4125.9
39.6	Q10425	Q10425	Eukaryotic translation initiation factor 3 subunit B	SPAC25G10.08	sp|Q10425|EIF3B_SCHPO Eukaryotic translation initiation factor 3 subunit B OS=Schizosaccharomyces pombe (strain 972 / ATCC 24843) OX=284812 GN=SPAC25G10.08 PE=1 SV=1	84.034	171890	9	4092.7
27.5	O94515	O94515	T-complex protein 1 subunit zeta	cct6	sp|O94515|TCPZ_SCHPO T-complex protein 1 subunit zeta OS=Schizosaccharomyces pombe (strain 972 / ATCC 24843) OX=284812 GN=cct6 PE=3 SV=1	58.548	114290	7	4081.9
27.5	O59682	O59682	Serine palmitoyltransferase 1	lcb1	sp|O59682|LCB1_SCHPO Serine palmitoyltransferase 1 OS=Schizosaccharomyces pombe (strain 972 / ATCC 24843) OX=284812 GN=lcb1 PE=3 SV=1	57.468	97765	6	4073.6
14.9	Q9Y7Z8	Q9Y7Z8	Myosin-1	myo1	sp|Q9Y7Z8|MYO1_SCHPO Myosin-1 OS=Schizosaccharomyces pombe (strain 972 / ATCC 24843) OX=284812 GN=myo1 PE=1 SV=1	135.71	290210	10	4030.7
21.5	Q9HEQ9	Q9HEQ9	Single-stranded TG1-3 DNA-binding protein	tcg1	sp|Q9HEQ9|TCG1_SCHPO Single-stranded TG1-3 DNA-binding protein OS=Schizosaccharomyces pombe (strain 972 / ATCC 24843) OX=284812 GN=tcg1 PE=1 SV=3	38.002	63819	2	3988.7
10.9	O74352	O74352	Protein hob1	hob1	sp|O74352|HOB1_SCHPO Protein hob1 OS=Schizosaccharomyces pombe (strain 972 / ATCC 24843) OX=284812 GN=hob1 PE=1 SV=1	51.391	62923	3	3932.7
32.7	O59945	O59945	Fimbrin	fim1	sp|O59945|FIMB_SCHPO Fimbrin OS=Schizosaccharomyces pombe (strain 972 / ATCC 24843) OX=284812 GN=fim1 PE=1 SV=1	68.617	148640	6	3911.6
21.3	Q9UT48	Q9UT48	Eukaryotic translation initiation factor 3 subunit H	eif3h	sp|Q9UT48|EIF3H_SCHPO Eukaryotic translation initiation factor 3 subunit H OS=Schizosaccharomyces pombe (strain 972 / ATCC 24843) OX=284812 GN=eif3h PE=1 SV=1	39.78	42825	2	3893.1
33.7	Q9UUM7	Q9UUM7	Protein hob3	hob3	sp|Q9UUM7|HOB3_SCHPO Protein hob3 OS=Schizosaccharomyces pombe (strain 972 / ATCC 24843) OX=284812 GN=hob3 PE=1 SV=1	30.094	77455	5	3872.8
32.8	O14121	O14121	Probable NADH-ubiquinone oxidoreductase C3A11.07, mitochondrial	SPAC3A11.07	sp|O14121|NDH1_SCHPO Probable NADH-ubiquinone oxidoreductase C3A11.07, mitochondrial OS=Schizosaccharomyces pombe (strain 972 / ATCC 24843) OX=284812 GN=SPAC3A11.07 PE=3 SV=1	61.674	108290	7	3867.5
36.4	Q10137	Q10137	Sec14 cytosolic factor	sec14	sp|Q10137|SEC14_SCHPO Sec14 cytosolic factor OS=Schizosaccharomyces pombe (strain 972 / ATCC 24843) OX=284812 GN=sec14 PE=4 SV=1	32.746	61841	3	3865.1
16	O74767	O74767	Probable coatomer subunit epsilon	sec28	sp|O74767|COPE_SCHPO Probable coatomer subunit epsilon OS=Schizosaccharomyces pombe (strain 972 / ATCC 24843) OX=284812 GN=sec28 PE=1 SV=1	31.774	49988	2	3845.2
16.2	P36581	P36581	Calnexin homolog	cal1	sp|P36581|CALX_SCHPO Calnexin homolog OS=Schizosaccharomyces pombe (strain 972 / ATCC 24843) OX=284812 GN=cal1 PE=1 SV=1	63.465	111110	5	3831.2
42.4	O74690	O74690	13 kDa ribonucleoprotein-associated protein	snu13	sp|O74690|SNU13_SCHPO 13 kDa ribonucleoprotein-associated protein OS=Schizosaccharomyces pombe (strain 972 / ATCC 24843) OX=284812 GN=snu13 PE=3 SV=1	13.535	19122	1	3824.4
16.6	O74526	O74526	Probable serine/threonine-protein kinase C70.05c	SPCC70.05c	sp|O74526|KJ45_SCHPO Probable serine/threonine-protein kinase C70.05c OS=Schizosaccharomyces pombe (strain 972 / ATCC 24843) OX=284812 GN=SPCC70.05c PE=1 SV=1	85.909	147290	9	3776.8
6.5	O59680	O59680	Cytochrome c1, heme protein, mitochondrial	cyt1	sp|O59680|CY1_SCHPO Cytochrome c1, heme protein, mitochondrial OS=Schizosaccharomyces pombe (strain 972 / ATCC 24843) OX=284812 GN=cyt1 PE=3 SV=1	34.34	41416	1	3765.1
30.6	O74174	O74174	V-type proton ATPase subunit G	vma10	sp|O74174|VATG_SCHPO V-type proton ATPase subunit G OS=Schizosaccharomyces pombe (strain 972 / ATCC 24843) OX=284812 GN=vma10 PE=3 SV=2	12.162	18818	1	3763.6
34.8	P87313	P87313	Translation machinery-associated protein 20	tma20	sp|P87313|TMA20_SCHPO Translation machinery-associated protein 20 OS=Schizosaccharomyces pombe (strain 972 / ATCC 24843) OX=284812 GN=tma20 PE=3 SV=5	20.249	37490	1	3749
29.2	P31406	P31406	V-type proton ATPase catalytic subunit A	vma1	sp|P31406|VATA_SCHPO V-type proton ATPase catalytic subunit A OS=Schizosaccharomyces pombe (strain 972 / ATCC 24843) OX=284812 GN=vma1 PE=3 SV=1	68.805	134840	7	3745.5
20.5	Q09689	Q09689	Probable eukaryotic translation initiation factor 5	SPAC2F7.05c	sp|Q09689|IF5_SCHPO Probable eukaryotic translation initiation factor 5 OS=Schizosaccharomyces pombe (strain 972 / ATCC 24843) OX=284812 GN=tif5 PE=3 SV=1	44.944	74236	3	3711.8
39.1	O43060	O43060	Eukaryotic translation initiation factor 3 subunit F	eif3f	sp|O43060|EIF3F_SCHPO Eukaryotic translation initiation factor 3 subunit F OS=Schizosaccharomyces pombe (strain 972 / ATCC 24843) OX=284812 GN=eif3f PE=1 SV=1	33.251	47929	3	3686.8
19.7	Q9USR1	Q9USR1	Thioredoxin-like protein 1	txl1	sp|Q9USR1|TXL1_SCHPO Thioredoxin-like protein 1 OS=Schizosaccharomyces pombe (strain 972 / ATCC 24843) OX=284812 GN=txl1 PE=4 SV=1	31.889	58483	4	3655.2
40.9	Q11118	Q11118	Protein wos2	wos2	sp|Q11118|WOS2_SCHPO Protein wos2 OS=Schizosaccharomyces pombe (strain 972 / ATCC 24843) OX=284812 GN=wos2 PE=2 SV=1	20.951	21858	2	3642.9
29.3	O94641	O94641	Heat shock protein 104	hsp104	sp|O94641|HS104_SCHPO Heat shock protein 104 OS=Schizosaccharomyces pombe (strain 972 / ATCC 24843) OX=284812 GN=hsp104 PE=3 SV=1	100.51	155180	10	3608.8
24.7	Q9URX7	Q9URX7	Protein arginine N-methyltransferase 1	rmt1	sp|Q9URX7|ANM1_SCHPO Protein arginine N-methyltransferase 1 OS=Schizosaccharomyces pombe (strain 972 / ATCC 24843) OX=284812 GN=rmt1 PE=1 SV=2	39.018	75615	4	3600.7
28.1	O43011	O43011	Histidine--tRNA ligase, mitochondrial	hts1	sp|O43011|SYH_SCHPO Histidine--tRNA ligase, mitochondrial OS=Schizosaccharomyces pombe (strain 972 / ATCC 24843) OX=284812 GN=hts1 PE=1 SV=2	63.304	113980	4	3561.9
8.8	O14273	O14273	Meiotically up-regulated protein C8C9.04	SPAC8C9.04	sp|O14273|YET4_SCHPO Meiotically up-regulated protein C8C9.04 OS=Schizosaccharomyces pombe (strain 972 / ATCC 24843) OX=284812 GN=SPAC8C9.04 PE=1 SV=1	67.035	85247	3	3551.9
26.2	Q9Y7X5	Q9Y7X5	UDP-glucose 4-epimerase uge1	uge1	sp|Q9Y7X5|UGE1_SCHPO UDP-glucose 4-epimerase uge1 OS=Schizosaccharomyces pombe (strain 972 / ATCC 24843) OX=284812 GN=uge1 PE=1 SV=1	39.233	62750	5	3486.1
26	Q09181	Q09181	Putative ATP-dependent RNA helicase ste13	ste13	sp|Q09181|DHH1_SCHPO Putative ATP-dependent RNA helicase ste13 OS=Schizosaccharomyces pombe (strain 972 / ATCC 24843) OX=284812 GN=ste13 PE=3 SV=1	54.794	90130	4	3466.6
31.1	Q9UUA1	Q9UUA1	Oxysterol-binding protein homolog C23B6.01c	SPCC23B6.01c	sp|Q9UUA1|YJX1_SCHPO Oxysterol-binding protein homolog C23B6.01c OS=Schizosaccharomyces pombe (strain 972 / ATCC 24843) OX=284812 GN=SPCC23B6.01c PE=1 SV=2	54.647	109360	5	3417.4
29.1	P36596	P36596	Squalene synthase	erg9	sp|P36596|FDFT_SCHPO Squalene synthase OS=Schizosaccharomyces pombe (strain 972 / ATCC 24843) OX=284812 GN=erg9 PE=1 SV=1	53.321	87810	6	3377.3
16.3	Q9P7Y7	Q9P7Y7	Pyrroline-5-carboxylate reductase	pro3	sp|Q9P7Y7|P5CR_SCHPO Pyrroline-5-carboxylate reductase OS=Schizosaccharomyces pombe (strain 972 / ATCC 24843) OX=284812 GN=pro3 PE=3 SV=1	29.875	43804	3	3369.5
45.9	Q9UTJ7	Q9UTJ7	Probable succinate dehydrogenase [ubiquinone] flavoprotein subunit, mitochondrial	sdh1	sp|Q9UTJ7|SDHA_SCHPO Probable succinate dehydrogenase [ubiquinone] flavoprotein subunit, mitochondrial OS=Schizosaccharomyces pombe (strain 972 / ATCC 24843) OX=284812 GN=sdh1 PE=2 SV=1	70.465	113390	7	3334.9
22.1	O74787	O74787	Phosphatidylethanolamine N-methyltransferase	cho2	sp|O74787|CHO2_SCHPO Phosphatidylethanolamine N-methyltransferase OS=Schizosaccharomyces pombe (strain 972 / ATCC 24843) OX=284812 GN=cho2 PE=1 SV=1	102.76	123350	7	3333.7
27.1	O36016	O36016	Serine/threonine-protein phosphatase 2A activator 1	rrd1	sp|O36016|PTPA1_SCHPO Serine/threonine-protein phosphatase 2A activator 1 OS=Schizosaccharomyces pombe (strain 972 / ATCC 24843) OX=284812 GN=rrd1 PE=3 SV=1	37.169	73338	5	3333.6
23	Q10306	Q10306	Probable citrate synthase, mitochondrial	cit1	sp|Q10306|CISY_SCHPO Probable citrate synthase, mitochondrial OS=Schizosaccharomyces pombe (strain 972 / ATCC 24843) OX=284812 GN=cit1 PE=3 SV=3	54.16	79882	5	3328.4
29.3	P0CU18;P0CU17	P0CU18;P0CU17			sp|P0CU18|RPN52_SCHPO 26S proteasome regulatory subunit rpn502 OS=Schizosaccharomyces pombe (strain 972 / ATCC 24843) OX=284812 GN=rpn502 PE=1 SV=1;sp|P0CU17|RPN51_SCHPO 26S proteasome regulatory subunit rpn501 OS=Schizosaccharomyces pombe (strain 972 / AT	51.618	89390	4	3310.7
42.3	Q9UTS6	Q9UTS6	Dynein light chain Tctex-type	dlc1	sp|Q9UTS6|DYLT_SCHPO Dynein light chain Tctex-type OS=Schizosaccharomyces pombe (strain 972 / ATCC 24843) OX=284812 GN=dlc1 PE=1 SV=1	12.254	29516	1	3279.6
30	Q9UTM4	Q9UTM4	T-complex protein 1 subunit epsilon	cct5	sp|Q9UTM4|TCPE_SCHPO T-complex protein 1 subunit epsilon OS=Schizosaccharomyces pombe (strain 972 / ATCC 24843) OX=284812 GN=cct5 PE=3 SV=1	59.377	97446	4	3248.2
39.7	Q09694	Q09694	Saccharopine dehydrogenase [NAD(+), L-lysine-forming]	lys3	sp|Q09694|LYS1_SCHPO Saccharopine dehydrogenase [NAD(+), L-lysine-forming] OS=Schizosaccharomyces pombe (strain 972 / ATCC 24843) OX=284812 GN=lys3 PE=1 SV=2	41.392	61176	2	3219.8
16.4	P87316	P87316	Putative ATP synthase subunit epsilon, mitochondrial	atp15	sp|P87316|ATP5E_SCHPO Putative ATP synthase subunit epsilon, mitochondrial OS=Schizosaccharomyces pombe (strain 972 / ATCC 24843) OX=284812 GN=atp15 PE=3 SV=1	7.7406	9629	1	3209.7
28.3	Q10253	Q10253	Meiotically up-regulated gene 64 protein	mug64	sp|Q10253|MUG64_SCHPO Meiotically up-regulated gene 64 protein OS=Schizosaccharomyces pombe (strain 972 / ATCC 24843) OX=284812 GN=mug64 PE=1 SV=3	31.747	53693	2	3158.4
35.4	O14110	O14110	Probable aminomethyltransferase, mitochondrial	gcv1	sp|O14110|GCST_SCHPO Probable aminomethyltransferase, mitochondrial OS=Schizosaccharomyces pombe (strain 972 / ATCC 24843) OX=284812 GN=gcv1 PE=3 SV=1	42.408	66117	4	3148.4
16.1	P78870	P78870	Probable S-(hydroxymethyl)glutathione dehydrogenase 1	SPBC1539.07c	sp|P78870|FADH1_SCHPO Probable S-(hydroxymethyl)glutathione dehydrogenase 1 OS=Schizosaccharomyces pombe (strain 972 / ATCC 24843) OX=284812 GN=SPBC1539.07c PE=2 SV=2	40.444	47097	2	3139.8
68.2	O74322	O74322	40S ribosomal protein S12-B	rps12b	sp|O74322|RS12B_SCHPO 40S ribosomal protein S12-B OS=Schizosaccharomyces pombe (strain 972 / ATCC 24843) OX=284812 GN=rps1202 PE=3 SV=1	15.871	15671	3	3134.2
25.8	Q09892	Q09892	Mitogen-activated protein kinase sty1	sty1	sp|Q09892|HOG1_SCHPO Mitogen-activated protein kinase sty1 OS=Schizosaccharomyces pombe (strain 972 / ATCC 24843) OX=284812 GN=sty1 PE=1 SV=1	40.222	49385	5	3086.6
23.8	P40231	P40231	Casein kinase II subunit alpha	cka1	sp|P40231|CSK2A_SCHPO Casein kinase II subunit alpha OS=Schizosaccharomyces pombe (strain 972 / ATCC 24843) OX=284812 GN=cka1 PE=2 SV=2	39.527	61507	3	3075.3
28	O74894	O74894	26S protease regulatory subunit 6B homolog	rpt3	sp|O74894|PRS6B_SCHPO 26S proteasome regulatory subunit 6B homolog OS=Schizosaccharomyces pombe (strain 972 / ATCC 24843) OX=284812 GN=rpt3 PE=3 SV=1	43.552	70729	4	3075.2
0.7	O14207	O14207	Protein mms22	mus7	sp|O14207|MMS22_SCHPO Protein mms22 OS=Schizosaccharomyces pombe (strain 972 / ATCC 24843) OX=284812 GN=mus7 PE=3 SV=1	217.43	264420	1	3074.6
17.1	P41390	P41390	Amidophosphoribosyltransferase	ade4	sp|P41390|PUR1_SCHPO Amidophosphoribosyltransferase OS=Schizosaccharomyces pombe (strain 972 / ATCC 24843) OX=284812 GN=ade4 PE=1 SV=1	59.831	91782	5	3059.4
28.5	P50514	P50514	Probable argininosuccinate lyase	argx	sp|P50514|ARLZ_SCHPO Probable argininosuccinate lyase OS=Schizosaccharomyces pombe (strain 972 / ATCC 24843) OX=284812 GN=argx PE=3 SV=1	51.571	76458	6	3058.3
39.6	O94266	O94266	Putative hydroxymethylpyrimidine/phosphomethylpyrimidine kinase 2	SPBP8B7.18c	sp|O94266|THI22_SCHPO Putative hydroxymethylpyrimidine/phosphomethylpyrimidine kinase 2 OS=Schizosaccharomyces pombe (strain 972 / ATCC 24843) OX=284812 GN=SPBP8B7.18c PE=3 SV=1	61.354	76323	7	3052.9
6.4	Q9USJ9	Q9USJ9	54S ribosomal protein L12, mitochondrial	mnp1	sp|Q9USJ9|MNP1_SCHPO 54S ribosomal protein L12, mitochondrial OS=Schizosaccharomyces pombe (strain 972 / ATCC 24843) OX=284812 GN=mrpl12 PE=3 SV=2	18.966	21330	1	3047.1
20.6	O43047	O43047	GrpE protein homolog, mitochondrial	mge1	sp|O43047|GRPE_SCHPO GrpE protein homolog, mitochondrial OS=Schizosaccharomyces pombe (strain 972 / ATCC 24843) OX=284812 GN=mge1 PE=3 SV=1	25.334	30169	2	3016.9
26.9	O59730	O59730	Methionine aminopeptidase 1	fma1	sp|O59730|MAP1_SCHPO Methionine aminopeptidase 1 OS=Schizosaccharomyces pombe (strain 972 / ATCC 24843) OX=284812 GN=fma1 PE=1 SV=1	42.139	62736	4	2987.4
19.5	Q10305	Q10305	Probable secretory pathway GDP dissociation inhibitor 1	gdi1	sp|Q10305|GDI1_SCHPO Probable secretory pathway GDP dissociation inhibitor 1 OS=Schizosaccharomyces pombe (strain 972 / ATCC 24843) OX=284812 GN=gdi1 PE=3 SV=1	49.555	71676	2	2986.5
34.7	O42699	O42699	60S ribosomal protein L19-B	rpl19b	sp|O42699|RL19B_SCHPO 60S ribosomal protein L19-B OS=Schizosaccharomyces pombe (strain 972 / ATCC 24843) OX=284812 GN=rpl1902 PE=2 SV=2	22.753	23818	10	2977.2
44.9	Q9UT97	Q9UT97	Probable proteasome subunit alpha type-5	pup2	sp|Q9UT97|PSA5_SCHPO Probable proteasome subunit alpha type-5 OS=Schizosaccharomyces pombe (strain 972 / ATCC 24843) OX=284812 GN=pup2 PE=1 SV=1	27.573	41669	4	2976.4
24.1	O94586	O94586	Hit family protein 1	hnt1	sp|O94586|HNT1_SCHPO Adenosine 5-monophosphoramidase hnt1 OS=Schizosaccharomyces pombe (strain 972 / ATCC 24843) OX=284812 GN=hnt1 PE=3 SV=1	14.58	26757	1	2973
64.4	Q09757	Q09757	40S ribosomal protein S9-A	rps9a	sp|Q09757|RS9A_SCHPO 40S ribosomal protein S9-A OS=Schizosaccharomyces pombe (strain 972 / ATCC 24843) OX=284812 GN=rps901 PE=1 SV=2	22.161	32473	9	2952.1
27.3	Q9UT25	Q9UT25	Uncharacterized N-acetyltransferase C9.02c	SPAC9.02c	sp|Q9UT25|YFY2_SCHPO Uncharacterized N-acetyltransferase C9.02c OS=Schizosaccharomyces pombe (strain 972 / ATCC 24843) OX=284812 GN=SPAC9.02c PE=3 SV=1	18.791	32408	3	2946.2
13.6	O36023	O36023	Septin homolog spn1	spn1	sp|O36023|SPN1_SCHPO Septin homolog spn1 OS=Schizosaccharomyces pombe (strain 972 / ATCC 24843) OX=284812 GN=spn1 PE=1 SV=2	53.737	67656	4	2941.6
23.6	O13902	O13902	Dihydroxyacetone kinase 1	dak1	sp|O13902|DAK1_SCHPO Dihydroxyacetone kinase 1 OS=Schizosaccharomyces pombe (strain 972 / ATCC 24843) OX=284812 GN=dak1 PE=3 SV=1	62.316	99135	4	2915.7
21	O14126	O14126	26S protease regulatory subunit 6A	tbp1	sp|O14126|PRS6A_SCHPO 26S proteasome regulatory subunit 6A OS=Schizosaccharomyces pombe (strain 972 / ATCC 24843) OX=284812 GN=tbp1 PE=3 SV=1	48.835	58268	3	2913.4
33.5	O14092	O14092	5-aminolevulinate synthase, mitochondrial	hem1	sp|O14092|HEM1_SCHPO 5-aminolevulinate synthase, mitochondrial OS=Schizosaccharomyces pombe (strain 972 / ATCC 24843) OX=284812 GN=hem1 PE=3 SV=1	60.959	84313	6	2907.3
16.2	P78854	P78854	Lysophospholipase 1	plb1	sp|P78854|PLB1_SCHPO Lysophospholipase 1 OS=Schizosaccharomyces pombe (strain 972 / ATCC 24843) OX=284812 GN=plb1 PE=2 SV=2	67.118	48876	2	2875.1
20.9	Q09735	Q09735	Putative aminopeptidase C13A11.05	SPAC13A11.05	sp|Q09735|YA55_SCHPO Putative aminopeptidase C13A11.05 OS=Schizosaccharomyces pombe (strain 972 / ATCC 24843) OX=284812 GN=SPAC13A11.05 PE=3 SV=1	56.194	91205	5	2850.2
16.9	P41831	P41831	Ribose-phosphate pyrophosphokinase 1	SPAC4A8.14	sp|P41831|KPR1_SCHPO Ribose-phosphate pyrophosphokinase 1 OS=Schizosaccharomyces pombe (strain 972 / ATCC 24843) OX=284812 GN=SPAC4A8.14 PE=3 SV=1	45.352	45561	3	2847.5
27	O42849	O42849	Phenylalanine--tRNA ligase beta subunit	frs1	sp|O42849|SYFB_SCHPO Phenylalanine--tRNA ligase beta subunit OS=Schizosaccharomyces pombe (strain 972 / ATCC 24843) OX=284812 GN=frs1 PE=3 SV=1	66.849	96577	5	2840.5
47.7	O74781	O74781	Probable arginine--tRNA ligase, cytoplasmic	mrs1	sp|O74781|SYRC_SCHPO Probable arginine--tRNA ligase, cytoplasmic OS=Schizosaccharomyces pombe (strain 972 / ATCC 24843) OX=284812 GN=mrs1 PE=2 SV=1	70.689	114400	7	2790.3
22.7	O94313	O94313	Carbamoyl-phosphate synthase arginine-specific large chain	arg4	sp|O94313|CARB_SCHPO Carbamoyl-phosphate synthase arginine-specific large chain OS=Schizosaccharomyces pombe (strain 972 / ATCC 24843) OX=284812 GN=arg4 PE=3 SV=1	127.48	178820	7	2751.1
38	P35551	P35551	rRNA 2-O-methyltransferase fibrillarin	fib1	sp|P35551|FBRL_SCHPO rRNA 2-O-methyltransferase fibrillarin OS=Schizosaccharomyces pombe (strain 972 / ATCC 24843) OX=284812 GN=fib1 PE=1 SV=1	32.04	49227	4	2734.8
39	O14105	O14105	Ribulose-phosphate 3-epimerase	SPAC31G5.05c	sp|O14105|RPE_SCHPO Ribulose-phosphate 3-epimerase OS=Schizosaccharomyces pombe (strain 972 / ATCC 24843) OX=284812 GN=SPAC31G5.05c PE=3 SV=1	25.205	27151	2	2715.1
19.1	O74178	O74178	Protein kes1	kes1	sp|O74178|KES1_SCHPO Protein kes1 OS=Schizosaccharomyces pombe (strain 972 / ATCC 24843) OX=284812 GN=kes1 PE=2 SV=2	44.591	48399	4	2688.8
28.5	O94284	O94284	Sulfide:quinone oxidoreductase, mitochondrial	hmt2	sp|O94284|HMT2_SCHPO Sulfide:quinone oxidoreductase, mitochondrial OS=Schizosaccharomyces pombe (strain 972 / ATCC 24843) OX=284812 GN=hmt2 PE=3 SV=1	51.574	79933	5	2664.4
22.2	P50999	P50999	T-complex protein 1 subunit delta	cct4	sp|P50999|TCPD_SCHPO T-complex protein 1 subunit delta OS=Schizosaccharomyces pombe (strain 972 / ATCC 24843) OX=284812 GN=cct4 PE=2 SV=2	56.968	77113	5	2659.1
15.6	Q9UTQ1	Q9UTQ1	Probable pyridoxamine 5-phosphate oxidase	SPAC1093.02	sp|Q9UTQ1|PDX3_SCHPO Probable pyridoxamine 5-phosphate oxidase OS=Schizosaccharomyces pombe (strain 972 / ATCC 24843) OX=284812 GN=SPAC1093.02 PE=3 SV=1	27.014	31718	3	2643.2
14.7	P79060	P79060	Protein translation factor sui1	sui1	sp|P79060|SUI1_SCHPO Protein translation factor sui1 OS=Schizosaccharomyces pombe (strain 972 / ATCC 24843) OX=284812 GN=sui1 PE=3 SV=3	12.434	13211	1	2642.2
9.5	O74873	O74873	Protein transport protein sec23-1	sec231	sp|O74873|SC231_SCHPO Protein transport protein sec23-1 OS=Schizosaccharomyces pombe (strain 972 / ATCC 24843) OX=284812 GN=sec231 PE=3 SV=1	84.844	84266	3	2633.3
4.4	O74504	O74504	UPF0590 protein C594.01		sp|O74504|YJD1_SCHPO UPF0590 protein C594.01 OS=Schizosaccharomyces pombe (strain 972 / ATCC 24843) OX=284812 GN=SPCC594.01 PE=1 SV=2	88.748	94400	3	2622.2
13.1	O74448	O74448	Peptidyl-prolyl cis-trans isomerase pin1	pin1	sp|O74448|PIN1_SCHPO Peptidyl-prolyl cis-trans isomerase pin1 OS=Schizosaccharomyces pombe (strain 972 / ATCC 24843) OX=284812 GN=pin1 PE=4 SV=1	19.773	26100	2	2610
9.4	Q09841	Q09841	Probable proteasome subunit beta type-2	pup1	sp|Q09841|PSB2_SCHPO Probable proteasome subunit beta type-2 OS=Schizosaccharomyces pombe (strain 972 / ATCC 24843) OX=284812 GN=pup1 PE=2 SV=1	29.337	38965	2	2597.7
34.9	P87058	P87058	La protein homolog	sla1	sp|P87058|LAH1_SCHPO La protein homolog OS=Schizosaccharomyces pombe (strain 972 / ATCC 24843) OX=284812 GN=sla1 PE=1 SV=1	34.616	38527	3	2568.5
29.7	Q9UT36	Q9UT36	Probable hydroxyacylglutathione hydrolase C824.07	SPAC824.07	sp|Q9UT36|GLO21_SCHPO Probable hydroxyacylglutathione hydrolase C824.07 OS=Schizosaccharomyces pombe (strain 972 / ATCC 24843) OX=284812 GN=SPAC824.07 PE=3 SV=1	28.483	30755	2	2562.9
29.9	O59701	O59701	Cysteine synthase 1	cys11	sp|O59701|CYSK_SCHPO Cysteine synthase 1 OS=Schizosaccharomyces pombe (strain 972 / ATCC 24843) OX=284812 GN=cys11 PE=1 SV=1	37.853	40825	3	2551.5
25.5	O14088	O14088	Uncharacterized oxidoreductase C2F3.05c	SPAC2F3.05c	sp|O14088|YER5_SCHPO Uncharacterized oxidoreductase C2F3.05c OS=Schizosaccharomyces pombe (strain 972 / ATCC 24843) OX=284812 GN=SPAC2F3.05c PE=3 SV=1	31.172	45684	3	2538
18.3	P15567	P15567	Phosphoribosylaminoimidazole carboxylase	ade6	sp|P15567|PUR6_SCHPO Phosphoribosylaminoimidazole carboxylase OS=Schizosaccharomyces pombe (strain 972 / ATCC 24843) OX=284812 GN=ade6 PE=3 SV=1	60.013	70660	5	2523.6
20.4	O14134	O14134	mRNA export factor elf1	elf1	sp|O14134|ELF1_SCHPO mRNA export factor elf1 OS=Schizosaccharomyces pombe (strain 972 / ATCC 24843) OX=284812 GN=elf1 PE=1 SV=1	116.7	143320	6	2514.3
38.6	P56329	P56329	Probable eukaryotic translation initiation factor 2 subunit beta	tif212	sp|P56329|IF2B_SCHPO Probable eukaryotic translation initiation factor 2 subunit beta OS=Schizosaccharomyces pombe (strain 972 / ATCC 24843) OX=284812 GN=tif212 PE=1 SV=2	35.96	47769	4	2514.2
34.5	P78814	P78814	Pre-mRNA-splicing factor srp2	srp2	sp|P78814|SRP2_SCHPO Pre-mRNA-splicing factor srp2 OS=Schizosaccharomyces pombe (strain 972 / ATCC 24843) OX=284812 GN=srp2 PE=1 SV=2	42.566	42594	4	2505.5
24.6	P20772	P20772	Bifunctional purine biosynthetic protein ADE1;Phosphoribosylamine--glycine ligase;Phosphoribosylformylglycinamidine cyclo-ligase	ade1	sp|P20772|PUR2_SCHPO Bifunctional purine biosynthetic protein ADE1 OS=Schizosaccharomyces pombe (strain 972 / ATCC 24843) OX=284812 GN=ade1 PE=3 SV=1	85.23	107530	6	2500.7
15.6	P87048	P87048	26S proteasome regulatory subunit rpn1	rpn1	sp|P87048|RPN1_SCHPO 26S proteasome regulatory subunit rpn1 OS=Schizosaccharomyces pombe (strain 972 / ATCC 24843) OX=284812 GN=rpn1 PE=1 SV=2	97.998	122420	3	2498.5
11.8	Q9P785	Q9P785	LisH domain-containing protein C1711.05	SPBC1711.05	sp|Q9P785|YNY5_SCHPO LisH domain-containing protein C1711.05 OS=Schizosaccharomyces pombe (strain 972 / ATCC 24843) OX=284812 GN=SPBC1711.05 PE=4 SV=1	47.427	22190	2	2465.5
23.3	O13718	O13718	Vacuolar transporter chaperone 2	vtc2	sp|O13718|VTC2_SCHPO Vacuolar transporter chaperone 2 OS=Schizosaccharomyces pombe (strain 972 / ATCC 24843) OX=284812 GN=vtc2 PE=1 SV=1	85.444	99499	7	2426.8
28.6	Q09723	Q09723	Multifunctional methyltransferase subunit trm112	trm112	sp|Q09723|TR112_SCHPO Multifunctional methyltransferase subunit trm112 OS=Schizosaccharomyces pombe (strain 972 / ATCC 24843) OX=284812 GN=trm112 PE=3 SV=1	14.075	21650	1	2405.6
16	Q9URV8	Q9URV8	UPF0744 protein C106.03	SPBC106.03	sp|Q9URV8|YBL3_SCHPO UPF0744 protein C106.03 OS=Schizosaccharomyces pombe (strain 972 / ATCC 24843) OX=284812 GN=SPBC106.03 PE=1 SV=1	40.006	44416	3	2337.7
9.4	Q92370	Q92370	Multifunctional tryptophan biosynthesis protein;Anthranilate synthase component 2;Indole-3-glycerol phosphate synthase;N-(5-phosphoribosyl)anthranilate isomerase	trp1	sp|Q92370|TRPG_SCHPO Multifunctional tryptophan biosynthesis protein OS=Schizosaccharomyces pombe (strain 972 / ATCC 24843) OX=284812 GN=trp1 PE=2 SV=2	83.039	100150	5	2329
19.7	Q9UT44	Q9UT44	Probable gamma-glutamyl phosphate reductase	pro1	sp|Q9UT44|PROA_SCHPO Probable gamma-glutamyl phosphate reductase OS=Schizosaccharomyces pombe (strain 972 / ATCC 24843) OX=284812 GN=pro1 PE=3 SV=1	48.706	69727	5	2324.2
11.8	Q09923	Q09923	Aldo-keto reductase yakc [NADP(+)]	yakc	sp|Q09923|YAKC_SCHPO Aldo-keto reductase yakc [NADP(+)] OS=Schizosaccharomyces pombe (strain 972 / ATCC 24843) OX=284812 GN=yakc PE=1 SV=1	37.71	39230	2	2307.6
16.7	O74378	O74378	2-oxoglutarate dehydrogenase, mitochondrial	kgd1	sp|O74378|ODO1_SCHPO 2-oxoglutarate dehydrogenase, mitochondrial OS=Schizosaccharomyces pombe (strain 972 / ATCC 24843) OX=284812 GN=kgd1 PE=3 SV=1	114.16	109690	8	2285.2
16.8	O94363	O94363	GTP-binding protein rhb1	rhb1	sp|O94363|RHB1_SCHPO GTP-binding protein rhb1 OS=Schizosaccharomyces pombe (strain 972 / ATCC 24843) OX=284812 GN=rhb1 PE=3 SV=1	20.515	29496	2	2268.9
26.8	B5BP46	B5BP46	Putative glutathione S-transferase C1183.02	SPBC460.02c	sp|B5BP46|YP52_SCHPO Putative glutathione S-transferase C460.02c OS=Schizosaccharomyces pombe (strain 972 / ATCC 24843) OX=284812 GN=SPBC460.02c PE=3 SV=1	25.717	36266	3	2266.6
26.3	Q10270	Q10270	Probable phosphoadenosine phosphosulfate reductase	met16	sp|Q10270|MET16_SCHPO Probable phosphoadenosine phosphosulfate reductase OS=Schizosaccharomyces pombe (strain 972 / ATCC 24843) OX=284812 GN=met16 PE=3 SV=1	30.56	31633	2	2259.5
25.6	O14081	O14081	Putative alpha,alpha-trehalose-phosphate synthase [UDP-forming] 106 kDa subunit		sp|O14081|TPSX_SCHPO Putative alpha,alpha-trehalose-phosphate synthase [UDP-forming] 106 kDa subunit OS=Schizosaccharomyces pombe (strain 972 / ATCC 24843) OX=284812 GN=SPAC2E11.16c PE=1 SV=1	106.82	96932	8	2254.2
19	O59681	O59681	Uncharacterized protein C18E5.01		sp|O59681|YBS1_SCHPO Uncharacterized protein C18E5.01 OS=Schizosaccharomyces pombe (strain 972 / ATCC 24843) OX=284812 GN=SPBC18E5.01 PE=3 SV=1	38.22	36030	1	2251.9
19.4	O74519	O74519	Uncharacterized N-acetyltransferase C663.13c	SPCC663.13c	sp|O74519|YCPD_SCHPO Uncharacterized N-acetyltransferase C663.13c OS=Schizosaccharomyces pombe (strain 972 / ATCC 24843) OX=284812 GN=SPCC663.13c PE=3 SV=1	16.323	19897	2	2210.7
27.1	O94337	O94337	Probable deoxyhypusine synthase	SPBC1271.04c	sp|O94337|DHYS_SCHPO Probable deoxyhypusine synthase OS=Schizosaccharomyces pombe (strain 972 / ATCC 24843) OX=284812 GN=SPBC1271.04c PE=3 SV=2	38.811	46273	2	2203.5
8.3	Q92462	Q92462	E3 ubiquitin-protein ligase pub1	pub1	sp|Q92462|PUB1_SCHPO E3 ubiquitin-protein ligase pub1 OS=Schizosaccharomyces pombe (strain 972 / ATCC 24843) OX=284812 GN=pub1 PE=1 SV=2	87.267	84890	2	2176.7
32.4	P31411	P31411	V-type proton ATPase subunit B	vma2	sp|P31411|VATB_SCHPO V-type proton ATPase subunit B OS=Schizosaccharomyces pombe (strain 972 / ATCC 24843) OX=284812 GN=vma2 PE=1 SV=2	55.841	58190	3	2155.2
10.9	P36586	P36586	GTP-binding protein ypt5	ypt5	sp|P36586|YPT5_SCHPO GTP-binding protein ypt5 OS=Schizosaccharomyces pombe (strain 972 / ATCC 24843) OX=284812 GN=ypt5 PE=1 SV=1	22.985	30165	1	2154.7
3.9	Q10343	Q10343	5-AMP-activated protein kinase subunit gamma	cbs2	sp|Q10343|AAKG_SCHPO 5-AMP-activated protein kinase subunit gamma OS=Schizosaccharomyces pombe (strain 972 / ATCC 24843) OX=284812 GN=cbs2 PE=1 SV=2	37.427	34429	1	2151.8
7.8	O13808	O13808	Actin-depolymerizing factor gmf1	gmf1	sp|O13808|GMF1_SCHPO Actin-depolymerizing factor gmf1 OS=Schizosaccharomyces pombe (strain 972 / ATCC 24843) OX=284812 GN=gmf1 PE=3 SV=1	16.281	17180	1	2147.5
18.4	P40233	P40233	Casein kinase I homolog 1	cki1	sp|P40233|CKI1_SCHPO Casein kinase I homolog 1 OS=Schizosaccharomyces pombe (strain 972 / ATCC 24843) OX=284812 GN=cki1 PE=1 SV=2	50.424	44960	4	2141
10.3	O13771	O13771	Uncharacterized protein C17A5.09c	SPAC17A5.09c	sp|O13771|YE99_SCHPO Uncharacterized protein C17A5.09c OS=Schizosaccharomyces pombe (strain 972 / ATCC 24843) OX=284812 GN=SPAC17A5.09c PE=1 SV=1	34.978	31974	2	2131.6
8.3	Q09154	Q09154	Cytochrome b-c1 complex subunit Rieske, mitochondrial	rip1	sp|Q09154|UCRI_SCHPO Cytochrome b-c1 complex subunit Rieske, mitochondrial OS=Schizosaccharomyces pombe (strain 972 / ATCC 24843) OX=284812 GN=rip1 PE=2 SV=2	24.74	16929	1	2116.1
10	Q09702	Q09702	Negative regulator of differentiation 1	nrd1	sp|Q09702|NRD1_SCHPO Negative regulator of differentiation 1 OS=Schizosaccharomyces pombe (strain 972 / ATCC 24843) OX=284812 GN=nrd1 PE=1 SV=1	57.76	44160	2	2102.9
37.7	Q09717	Q09717	Ran-specific GTPase-activating protein 1	sbp1	sp|Q09717|RANG_SCHPO Ran-specific GTPase-activating protein 1 OS=Schizosaccharomyces pombe (strain 972 / ATCC 24843) OX=284812 GN=sbp1 PE=1 SV=1	24.15	25193	2	2099.4
17.8	P78810	P78810	Vacuolar transporter chaperone 4	vtc4	sp|P78810|VTC4_SCHPO Vacuolar transporter chaperone 4 OS=Schizosaccharomyces pombe (strain 972 / ATCC 24843) OX=284812 GN=vtc4 PE=1 SV=2	83.634	81081	6	2079
12.5	O13944	O13944	Oxysterol-binding protein homolog C23H4.01c		sp|O13944|YEH1_SCHPO Oxysterol-binding protein homolog C23H4.01c OS=Schizosaccharomyces pombe (strain 972 / ATCC 24843) OX=284812 GN=SPAC23H4.01c PE=1 SV=2	106.81	107720	6	2071.5
33	P56286	P56286	Eukaryotic translation initiation factor 2 subunit alpha	tif211	sp|P56286|IF2A_SCHPO Eukaryotic translation initiation factor 2 subunit alpha OS=Schizosaccharomyces pombe (strain 972 / ATCC 24843) OX=284812 GN=tif211 PE=1 SV=1	34.525	41073	3	2053.7
15.7	Q09747	Q09747	ATP-dependent RNA helicase dbp5	dbp5	sp|Q09747|DBP5_SCHPO ATP-dependent RNA helicase dbp5 OS=Schizosaccharomyces pombe (strain 972 / ATCC 24843) OX=284812 GN=dbp5 PE=1 SV=1	56.304	63661	3	2053.6
30.6	Q10489	Q10489	Pyruvate dehydrogenase E1 component subunit alpha, mitochondrial	pda1	sp|Q10489|ODPA_SCHPO Pyruvate dehydrogenase E1 component subunit alpha, mitochondrial OS=Schizosaccharomyces pombe (strain 972 / ATCC 24843) OX=284812 GN=pda1 PE=1 SV=1	45.137	47083	2	2047.1
22.8	O60102	O60102	Translation initiation factor rli1	rli1	sp|O60102|RLI1_SCHPO Translation initiation factor rli1 OS=Schizosaccharomyces pombe (strain 972 / ATCC 24843) OX=284812 GN=rli1 PE=3 SV=1	66.589	65249	4	2039
18.2	O42932	O42932	Cytochrome b-c1 complex subunit 6	qcr6	sp|O42932|QCR6_SCHPO Cytochrome b-c1 complex subunit 6 OS=Schizosaccharomyces pombe (strain 972 / ATCC 24843) OX=284812 GN=qcr6 PE=3 SV=1	24.307	26253	1	2019.5
11.2	O43050	O43050	Sterol-4-alpha-carboxylate 3-dehydrogenase, decarboxylating	erg26	sp|O43050|ERG26_SCHPO Sterol-4-alpha-carboxylate 3-dehydrogenase, decarboxylating OS=Schizosaccharomyces pombe (strain 972 / ATCC 24843) OX=284812 GN=erg26 PE=3 SV=1	38.317	28048	1	2003.5
19.7	Q9UTL3	Q9UTL3	Ribose-5-phosphate isomerase	rki1	sp|Q9UTL3|RPIA_SCHPO Ribose-5-phosphate isomerase OS=Schizosaccharomyces pombe (strain 972 / ATCC 24843) OX=284812 GN=rki1 PE=3 SV=1	29.329	31987	1	1999.2
20.7	Q9USX1	Q9USX1	Aminopeptidase 1	ape1	sp|Q9USX1|APE1_SCHPO Aminopeptidase 1 OS=Schizosaccharomyces pombe (strain 972 / ATCC 24843) OX=284812 GN=ape1 PE=3 SV=1	99.445	100010	3	1960.9
11.9	Q09720	Q09720	Probable proteasome subunit beta type-4	SPAC31A2.04c	sp|Q09720|PSB4_SCHPO Probable proteasome subunit beta type-4 OS=Schizosaccharomyces pombe (strain 972 / ATCC 24843) OX=284812 GN=SPAC31A2.04c PE=3 SV=1	21.967	15598	1	1949.7
12.1	Q9P7T8	Q9P7T8	Uncharacterized helicase C694.02	SPAC694.02	sp|Q9P7T8|YIW2_SCHPO Uncharacterized helicase C694.02 OS=Schizosaccharomyces pombe (strain 972 / ATCC 24843) OX=284812 GN=SPAC694.02 PE=3 SV=1	195.06	148030	8	1947.8
30.4	O13820	O13820	Cytochrome P450 61	erg5	sp|O13820|ERG5_SCHPO Cytochrome P450 61 OS=Schizosaccharomyces pombe (strain 972 / ATCC 24843) OX=284812 GN=erg5 PE=1 SV=3	62.27	60277	3	1944.4
17.2	O43014	O43014	Mannose-6-phosphate isomerase	pmi40	sp|O43014|MPI_SCHPO Mannose-6-phosphate isomerase OS=Schizosaccharomyces pombe (strain 972 / ATCC 24843) OX=284812 GN=pmi40 PE=3 SV=1	45.59	32741	2	1925.9
10.5	O13867	O13867	Uracil phosphoribosyltransferase 1	SPAC1B3.01c	sp|O13867|UPP1_SCHPO Uracil phosphoribosyltransferase 1 OS=Schizosaccharomyces pombe (strain 972 / ATCC 24843) OX=284812 GN=SPAC1B3.01c PE=3 SV=1	24.466	21078	1	1916.2
55.2	O74433	O74433	Cytochrome b-c1 complex subunit 9	qcr9	sp|O74433|QCR9_SCHPO Cytochrome b-c1 complex subunit 9 OS=Schizosaccharomyces pombe (strain 972 / ATCC 24843) OX=284812 GN=qcr9 PE=3 SV=2	7.7996	9550.3	1	1910.1
21.2	P36603	P36603	Ribonucleoside-diphosphate reductase small chain	suc22	sp|P36603|RIR2_SCHPO Ribonucleoside-diphosphate reductase small chain OS=Schizosaccharomyces pombe (strain 972 / ATCC 24843) OX=284812 GN=suc22 PE=3 SV=2	45.405	45790	3	1907.9
9.5	O42909	O42909	Zinc-type alcohol dehydrogenase-like protein C16A3.02c	SPBC16A3.02c	sp|O42909|YBI2_SCHPO Zinc-type alcohol dehydrogenase-like protein C16A3.02c OS=Schizosaccharomyces pombe (strain 972 / ATCC 24843) OX=284812 GN=SPBC16A3.02c PE=3 SV=1	38.186	34288	1	1904.9
21	Q10475	Q10475	Eukaryotic translation initiation factor 4 gamma	tif471	sp|Q10475|IF4G_SCHPO Eukaryotic translation initiation factor 4 gamma OS=Schizosaccharomyces pombe (strain 972 / ATCC 24843) OX=284812 GN=tif471 PE=1 SV=1	154.03	128560	10	1890.5
24.4	O94497	O94497	Uncharacterized serine-rich protein C18E5.07	SPBC18E5.07	sp|O94497|YBS7_SCHPO Uncharacterized serine-rich protein C18E5.07 OS=Schizosaccharomyces pombe (strain 972 / ATCC 24843) OX=284812 GN=SPBC18E5.07 PE=1 SV=1	65.328	54408	5	1876.1
17.3	O94444	O94444	26S proteasome regulatory subunit rpn10	rpn10	sp|O94444|RPN10_SCHPO 26S proteasome regulatory subunit rpn10 OS=Schizosaccharomyces pombe (strain 972 / ATCC 24843) OX=284812 GN=rpn10 PE=1 SV=1	27.14	14999	1	1874.8
28.3	O94512	O94512	Oxysterol-binding protein-like protein 1	obp1	sp|O94512|OBP1_SCHPO Oxysterol-binding protein-like protein 1 OS=Schizosaccharomyces pombe (strain 972 / ATCC 24843) OX=284812 GN=obp1 PE=1 SV=1	58.691	59799	6	1868.7
10.5	Q11120	Q11120	Prolyl 3,4-dihydroxylase ofd1	ofd1	sp|Q11120|OFD1_SCHPO Prolyl 3,4-dihydroxylase ofd1 OS=Schizosaccharomyces pombe (strain 972 / ATCC 24843) OX=284812 GN=ofd1 PE=1 SV=1	59.177	48314	3	1858.2
18.5	O13696	O13696	Isocitrate dehydrogenase [NAD] subunit 1, mitochondrial	idh1	sp|O13696|IDH1_SCHPO Isocitrate dehydrogenase [NAD] subunit 1, mitochondrial OS=Schizosaccharomyces pombe (strain 972 / ATCC 24843) OX=284812 GN=idh1 PE=1 SV=1	38.758	37123	2	1856.2
17.2	O94476	O94476	Eukaryotic translation initiation factor 6	tif6	sp|O94476|IF6_SCHPO Eukaryotic translation initiation factor 6 OS=Schizosaccharomyces pombe (strain 972 / ATCC 24843) OX=284812 GN=tif6 PE=3 SV=1	26.232	14830	1	1853.7
15.1	Q9UUI5	Q9UUI5	Protein transport protein sec24	sec24	sp|Q9UUI5|SEC24_SCHPO Protein transport protein sec24 OS=Schizosaccharomyces pombe (strain 972 / ATCC 24843) OX=284812 GN=sec24 PE=2 SV=1	101.9	64656	4	1847.3
17	Q10132	Q10132	Isopentenyl-diphosphate Delta-isomerase	idi1	sp|Q10132|IDI1_SCHPO Isopentenyl-diphosphate Delta-isomerase OS=Schizosaccharomyces pombe (strain 972 / ATCC 24843) OX=284812 GN=idi1 PE=2 SV=2	27.108	27693	1	1846.2
6.5	O43056	O43056	Probable homoserine kinase	SPBC4C3.03	sp|O43056|KHSE_SCHPO Probable homoserine kinase OS=Schizosaccharomyces pombe (strain 972 / ATCC 24843) OX=284812 GN=SPBC4C3.03 PE=3 SV=1	36.608	31326	1	1842.7
3.7	P53693	P53693	Protein rds1	rds1	sp|P53693|RDS1_SCHPO Protein rds1 OS=Schizosaccharomyces pombe (strain 972 / ATCC 24843) OX=284812 GN=rds1 PE=2 SV=2	43.827	11017	1	1836.1
9.3	O59816	O59816	Dihydrolipoyllysine-residue acetyltransferase component of pyruvate dehydrogenase complex, mitochondrial	lat1	sp|O59816|ODP2_SCHPO Dihydrolipoyllysine-residue acetyltransferase component of pyruvate dehydrogenase complex, mitochondrial OS=Schizosaccharomyces pombe (strain 972 / ATCC 24843) OX=284812 GN=lat1 PE=3 SV=1	52.06	49023	2	1815.7
16.6	O13928	O13928	GTP-binding protein rho3	rho3	sp|O13928|RHO3_SCHPO GTP-binding protein rho3 OS=Schizosaccharomyces pombe (strain 972 / ATCC 24843) OX=284812 GN=rho3 PE=1 SV=2	22.501	23602	2	1815.6
23.8	O94552	O94552	Fumarate hydratase, mitochondrial	fum1	sp|O94552|FUMH_SCHPO Fumarate hydratase, mitochondrial OS=Schizosaccharomyces pombe (strain 972 / ATCC 24843) OX=284812 GN=fum1 PE=3 SV=3	56.321	43544	4	1814.3
14.4	P31318	P31318	Protein arg11, mitochondrial;N-acetyl-gamma-glutamyl-phosphate reductase;Acetylglutamate kinase	arg11	sp|P31318|ARG56_SCHPO Protein arg11, mitochondrial OS=Schizosaccharomyces pombe (strain 972 / ATCC 24843) OX=284812 GN=arg11 PE=3 SV=2	97.704	73649	3	1796.3
12.5	Q92352	Q92352	Actin-related protein 2/3 complex subunit 4	arc4	sp|Q92352|ARPC4_SCHPO Actin-related protein 2/3 complex subunit 4 OS=Schizosaccharomyces pombe (strain 972 / ATCC 24843) OX=284812 GN=arc4 PE=1 SV=1	19.614	19664	1	1787.6
8	Q9UU83	Q9UU83	Protein pal1	pal1	sp|Q9UU83|PAL1_SCHPO Protein pal1 OS=Schizosaccharomyces pombe (strain 972 / ATCC 24843) OX=284812 GN=pal1 PE=1 SV=1	46.628	40837	2	1775.5
13	O74628	O74628	Uncharacterized oxidoreductase C162.03	SPCC162.03	sp|O74628|YQ53_SCHPO Uncharacterized oxidoreductase C162.03 OS=Schizosaccharomyces pombe (strain 972 / ATCC 24843) OX=284812 GN=SPCC162.03 PE=3 SV=1	32.614	29478	3	1734
17.8	Q9Y700	Q9Y700	Elongation factor Tu, mitochondrial	tuf1	sp|Q9Y700|EFTU_SCHPO Elongation factor Tu, mitochondrial OS=Schizosaccharomyces pombe (strain 972 / ATCC 24843) OX=284812 GN=tuf1 PE=3 SV=1	48.282	41612	4	1733.8
30	O59736	O59736	2-isopropylmalate synthase	leu3	sp|O59736|LEU1_SCHPO 2-isopropylmalate synthase OS=Schizosaccharomyces pombe (strain 972 / ATCC 24843) OX=284812 GN=leu3 PE=3 SV=2	64.041	50182	3	1730.4
19.6	O13774	O13774	GTP cyclohydrolase 1	SPAC17A5.13	sp|O13774|GCH1_SCHPO GTP cyclohydrolase 1 OS=Schizosaccharomyces pombe (strain 972 / ATCC 24843) OX=284812 GN=SPAC17A5.13 PE=1 SV=1	26.492	22481	1	1729.3
45	O74830	O74830	Putative glutathione S-transferase C1183.02	SPCC1183.02	sp|O74830|YC12_SCHPO Putative glutathione S-transferase C1183.02 OS=Schizosaccharomyces pombe (strain 972 / ATCC 24843) OX=284812 GN=SPCC1183.02 PE=3 SV=1	25.503	27450	2	1715.6
18.7	O42931	O42931	26S protease regulatory subunit 7 homolog	rpt1	sp|O42931|PRS7_SCHPO 26S proteasome regulatory subunit 7 homolog OS=Schizosaccharomyces pombe (strain 972 / ATCC 24843) OX=284812 GN=rpt1 PE=1 SV=2	48.965	53008	3	1709.9
57.1	P78833	P78833	Uncharacterized protein C21B10.08c	SPBC21B10.08c	sp|P78833|YHZ8_SCHPO Uncharacterized protein C21B10.08c OS=Schizosaccharomyces pombe (strain 972 / ATCC 24843) OX=284812 GN=SPBC21B10.08c PE=2 SV=1	21.833	20509	1	1709.1
20.3	P48009	P48009	Septin homolog spn4	spn4	sp|P48009|SPN4_SCHPO Septin homolog spn4 OS=Schizosaccharomyces pombe (strain 972 / ATCC 24843) OX=284812 GN=spn4 PE=1 SV=1	44.773	29045	3	1708.5
11.7	P48008	P48008	Septin homolog spn3	spn3	sp|P48008|SPN3_SCHPO Septin homolog spn3 OS=Schizosaccharomyces pombe (strain 972 / ATCC 24843) OX=284812 GN=spn3 PE=1 SV=3	46.66	32014	3	1685
27.2	Q10352	Q10352	Uncharacterized protein C1F12.10c	SPAC1F12.10c	sp|Q10352|YDAA_SCHPO Uncharacterized protein C1F12.10c OS=Schizosaccharomyces pombe (strain 972 / ATCC 24843) OX=284812 GN=SPAC1F12.10c PE=3 SV=1	16.667	16826	2	1682.6
14	O13648	O13648	Ribosomal protein arginine N-methyltransferase rmt3	rmt3	sp|O13648|ANM3_SCHPO Ribosomal protein arginine N-methyltransferase rmt3 OS=Schizosaccharomyces pombe (strain 972 / ATCC 24843) OX=284812 GN=rmt3 PE=1 SV=3	61.76	36671	3	1666.9
17.9	Q9UUK7	Q9UUK7	Phosphoribosylglycinamide formyltransferase	ade5	sp|Q9UUK7|PUR3_SCHPO Phosphoribosylglycinamide formyltransferase OS=Schizosaccharomyces pombe (strain 972 / ATCC 24843) OX=284812 GN=ade5 PE=2 SV=1	22.252	19999	2	1666.6
16.2	Q9USP6	Q9USP6	Clathrin light chain	clc1	sp|Q9USP6|CLC1_SCHPO Clathrin light chain OS=Schizosaccharomyces pombe (strain 972 / ATCC 24843) OX=284812 GN=clc1 PE=1 SV=1	25.863	19821	1	1651.7
29	O94609	O94609	Ubiquitin-activating enzyme E1 1	ptr3	sp|O94609|UBA1_SCHPO Ubiquitin-activating enzyme E1 1 OS=Schizosaccharomyces pombe (strain 972 / ATCC 24843) OX=284812 GN=ptr3 PE=1 SV=1	112.95	90645	5	1648.1
6.5	P78965	P78965	Glutathione reductase	pgr1	sp|P78965|GSHR_SCHPO Glutathione reductase OS=Schizosaccharomyces pombe (strain 972 / ATCC 24843) OX=284812 GN=pgr1 PE=3 SV=2	49.999	27862	2	1638.9
3.1	Q9US55	Q9US55	Glucosidase 2 subunit alpha	gls2	sp|Q9US55|GLU2A_SCHPO Glucosidase 2 subunit alpha OS=Schizosaccharomyces pombe (strain 972 / ATCC 24843) OX=284812 GN=gls2 PE=1 SV=1	106.28	68799	1	1638.1
14.3	O94563	O94563	Putative uncharacterized oxidoreductase C1773.04	SPBC1773.04	sp|O94563|YGD4_SCHPO Putative uncharacterized oxidoreductase C1773.04 OS=Schizosaccharomyces pombe (strain 972 / ATCC 24843) OX=284812 GN=SPBC1773.04 PE=1 SV=1	37.806	29141	2	1618.9
20.8	Q9HGM9	Q9HGM9	DnaJ homolog subfamily C member 7 homolog	SPBC543.02c	sp|Q9HGM9|DNJC7_SCHPO DnaJ homolog subfamily C member 7 homolog OS=Schizosaccharomyces pombe (strain 972 / ATCC 24843) OX=284812 GN=SPBC543.02c PE=4 SV=1	53.304	38816	3	1617.3
9.7	O13811	O13811	Protein disulfide-isomerase C17H9.14c	SPAC17H9.14c	sp|O13811|PDI2_SCHPO Protein disulfide-isomerase C17H9.14c OS=Schizosaccharomyces pombe (strain 972 / ATCC 24843) OX=284812 GN=SPAC17H9.14c PE=3 SV=1	40.691	30665	2	1613.9
15.7	O59771	O59771	Uridylate kinase	SPCC1795.05c	sp|O59771|KCY_SCHPO Uridylate kinase OS=Schizosaccharomyces pombe (strain 972 / ATCC 24843) OX=284812 GN=SPCC1795.05c PE=3 SV=1	21.716	14466	2	1607.4
40.3	Q9US22	Q9US22	60S ribosomal protein L15-B	rpl15b	sp|Q9US22|RL15B_SCHPO 60S ribosomal protein L15-B OS=Schizosaccharomyces pombe (strain 972 / ATCC 24843) OX=284812 GN=rpl1502 PE=1 SV=1	23.822	17520	6	1592.8
22.4	Q9USZ6	Q9USZ6	Ribosome assembly factor mrt4	mrt4	sp|Q9USZ6|MRT4_SCHPO Ribosome assembly factor mrt4 OS=Schizosaccharomyces pombe (strain 972 / ATCC 24843) OX=284812 GN=mrt4 PE=3 SV=1	26.663	18985	2	1582.1
16.9	Q09682	Q09682	Probable proteasome subunit alpha type-3		sp|Q09682|PSA3_SCHPO Probable proteasome subunit alpha type-3 OS=Schizosaccharomyces pombe (strain 972 / ATCC 24843) OX=284812 GN=SPAC13C5.01c PE=3 SV=1	27.925	18471	3	1539.3
13.3	Q9UTT1	Q9UTT1	Ubiquitin carboxyl-terminal hydrolase 21	ubp21	sp|Q9UTT1|UBP21_SCHPO Ubiquitin carboxyl-terminal hydrolase 21 OS=Schizosaccharomyces pombe (strain 972 / ATCC 24843) OX=284812 GN=ubp21 PE=3 SV=2	130.83	90505	8	1534
26.9	O13687	O13687	V-type proton ATPase subunit E	vma4	sp|O13687|VATE_SCHPO V-type proton ATPase subunit E OS=Schizosaccharomyces pombe (strain 972 / ATCC 24843) OX=284812 GN=vma4 PE=3 SV=1	25.741	13735	2	1526.1
1.9	O14174	O14174	SAGA complex subunit spt20	spt20	sp|O14174|SPT20_SCHPO SAGA complex subunit spt20 OS=Schizosaccharomyces pombe (strain 972 / ATCC 24843) OX=284812 GN=spt20 PE=1 SV=1	54.028	39435	1	1516.7
26.2	Q10356	Q10356	Glutathione-independent glyoxalase DJ-1	hsp3106	sp|Q10356|DJ1_SCHPO Glutathione-independent glyoxalase DJ-1 OS=Schizosaccharomyces pombe (strain 972 / ATCC 24843) OX=284812 GN=hsp3106 PE=1 SV=1	21.078	18012	2	1501
7	Q09745	Q09745	Uncharacterized protein C12C2.04	SPBC12C2.04	sp|Q09745|YB64_SCHPO Uncharacterized protein C12C2.04 OS=Schizosaccharomyces pombe (strain 972 / ATCC 24843) OX=284812 GN=SPBC12C2.04 PE=4 SV=1	43.031	25376	1	1492.7
20.6	Q9P786	Q9P786	Methylenetetrahydrofolate dehydrogenase [NAD(+)]	mtd1	sp|Q9P786|MTD1_SCHPO Methylenetetrahydrofolate dehydrogenase [NAD(+)] OS=Schizosaccharomyces pombe (strain 972 / ATCC 24843) OX=284812 GN=mtd1 PE=3 SV=1	35.814	32796	2	1490.7
17.8	O60060	O60060	Carbamoyl-phosphate synthase arginine-specific small chain	arg5	sp|O60060|CARA_SCHPO Carbamoyl-phosphate synthase arginine-specific small chain OS=Schizosaccharomyces pombe (strain 972 / ATCC 24843) OX=284812 GN=arg5 PE=3 SV=1	45.661	25312	3	1489
6.8	O43059	O43059	Cytoskeletal protein syp1	syp1	sp|O43059|SYP1_SCHPO Cytoskeletal protein syp1 OS=Schizosaccharomyces pombe (strain 972 / ATCC 24843) OX=284812 GN=syp1 PE=1 SV=1	90.756	63942	2	1487
26.8	Q00472	Q00472	4-nitrophenylphosphatase	pho2	sp|Q00472|PNPP_SCHPO 4-nitrophenylphosphatase OS=Schizosaccharomyces pombe (strain 972 / ATCC 24843) OX=284812 GN=pho2 PE=4 SV=2	32.793	25250	2	1485.3
15.6	Q10209	Q10209	Uncharacterized J domain-containing protein C4H3.01	SPAC4H3.01	sp|Q10209|YAY1_SCHPO Uncharacterized J domain-containing protein C4H3.01 OS=Schizosaccharomyces pombe (strain 972 / ATCC 24843) OX=284812 GN=SPAC4H3.01 PE=1 SV=1	44.768	35358	4	1473.2
11.9	Q9P7Q4	Q9P7Q4	Vesicular-fusion protein sec18	sec18	sp|Q9P7Q4|SEC18_SCHPO Vesicular-fusion protein sec18 OS=Schizosaccharomyces pombe (strain 972 / ATCC 24843) OX=284812 GN=sec18 PE=1 SV=1	87.553	69051	5	1469.2
5.7	O94373	O94373	ATP synthase subunit 4, mitochondrial	atp4	sp|O94373|ATPF_SCHPO ATP synthase subunit 4, mitochondrial OS=Schizosaccharomyces pombe (strain 972 / ATCC 24843) OX=284812 GN=atp4 PE=3 SV=1	26.7	20451	1	1460.8
16.3	Q10258	Q10258	Methylenetetrahydrofolate reductase 1	met9	sp|Q10258|MTHR1_SCHPO Methylenetetrahydrofolate reductase 1 OS=Schizosaccharomyces pombe (strain 972 / ATCC 24843) OX=284812 GN=met9 PE=1 SV=1	69.011	46725	4	1460.1
22.2	Q09925	Q09925	Serine palmitoyltransferase 2	lcb2	sp|Q09925|LCB2_SCHPO Serine palmitoyltransferase 2 OS=Schizosaccharomyces pombe (strain 972 / ATCC 24843) OX=284812 GN=lcb2 PE=3 SV=1	67.518	42285	3	1458.1
33.8	O60181	O60181	3,4-dihydroxy-2-butanone 4-phosphate synthase	SPBC23E6.06c	sp|O60181|RIB3_SCHPO 3,4-dihydroxy-2-butanone 4-phosphate synthase OS=Schizosaccharomyces pombe (strain 972 / ATCC 24843) OX=284812 GN=SPBC23E6.06c PE=3 SV=1	22.564	21711	2	1447.4
15.4	O60162	O60162	Uncharacterized protein C19F5.03	SPBC19F5.03	sp|O60162|YG23_SCHPO Uncharacterized protein C19F5.03 OS=Schizosaccharomyces pombe (strain 972 / ATCC 24843) OX=284812 GN=SPBC19F5.03 PE=1 SV=1	68.712	44513	2	1435.9
18.6	Q9P6K3	Q9P6K3	UPF0662 protein C30C2.08	SPAC30C2.08	sp|Q9P6K3|CUB1_SCHPO CUB1 family protein C30C2.08 OS=Schizosaccharomyces pombe (strain 972 / ATCC 24843) OX=284812 GN=SPAC30C2.08 PE=3 SV=1	52.69	39766	2	1420.2
12.8	O94504	O94504	Thioredoxin-2, mitochondrial	trx2	sp|O94504|TRX2_SCHPO Thioredoxin-2, mitochondrial OS=Schizosaccharomyces pombe (strain 972 / ATCC 24843) OX=284812 GN=trx2 PE=1 SV=2	15.079	12781	1	1420.1
9.4	O74489	O74489	Probable quinone oxidoreductase	zta1	sp|O74489|QOR_SCHPO Probable quinone oxidoreductase OS=Schizosaccharomyces pombe (strain 972 / ATCC 24843) OX=284812 GN=zta1 PE=1 SV=2	34.947	25209	2	1400.5
8.8	O42940	O42940	Inorganic phosphate transport protein pho88	pho88	sp|O42940|PHO88_SCHPO SRP-independent targeting protein 3 homolog OS=Schizosaccharomyces pombe (strain 972 / ATCC 24843) OX=284812 GN=pho88 PE=3 SV=2	21.964	13968	1	1396.8
9.3	O42851	O42851	Uncharacterized trans-sulfuration enzyme C23A1.14c	SPAC23A1.14c	sp|O42851|YFHE_SCHPO Uncharacterized trans-sulfuration enzyme C23A1.14c OS=Schizosaccharomyces pombe (strain 972 / ATCC 24843) OX=284812 GN=SPAC23A1.14c PE=2 SV=1	43.284	19498	1	1392.7
29.1	O14317;P17478;P08094	O14317;P17478;P08094	60S acidic ribosomal protein P2-C;60S acidic ribosomal protein P2-beta;60S acidic ribosomal protein P2-alpha	rpp203;rpp202;rpp201	sp|O14317|RLA6_SCHPO 60S acidic ribosomal protein P2-C OS=Schizosaccharomyces pombe (strain 972 / ATCC 24843) OX=284812 GN=rpp203 PE=1 SV=2;sp|P17478|RLA4_SCHPO 60S acidic ribosomal protein P2-beta OS=Schizosaccharomyces pombe (strain 972 / ATCC 24843) OX=	11.114	6962	1	1392.4
15.6	Q09816	Q09816	S-methyl-5-thioadenosine phosphorylase	SPAC16C9.02c	sp|Q09816|MTAP_SCHPO S-methyl-5-thioadenosine phosphorylase OS=Schizosaccharomyces pombe (strain 972 / ATCC 24843) OX=284812 GN=SPAC16C9.02c PE=3 SV=1	33.847	19425	1	1387.5
16.6	P08091	P08091	Acid phosphatase	pho1	sp|P08091|PPA1_SCHPO Acid phosphatase OS=Schizosaccharomyces pombe (strain 972 / ATCC 24843) OX=284812 GN=pho1 PE=2 SV=1	50.557	15233	1	1384.8
5.4	O74827	O74827	Phosphatidyl-N-methylethanolamine N-methyltransferase	cho1	sp|O74827|PLMT_SCHPO Phosphatidyl-N-methylethanolamine N-methyltransferase OS=Schizosaccharomyces pombe (strain 972 / ATCC 24843) OX=284812 GN=cho1 PE=3 SV=1	24.767	15145	1	1376.8
15.2	O14037	O14037	UPF0538 protein C2C4.04c	SPAC2C4.04c	sp|O14037|YEY4_SCHPO UPF0538 protein C2C4.04c OS=Schizosaccharomyces pombe (strain 972 / ATCC 24843) OX=284812 GN=SPAC2C4.04c PE=3 SV=1	14.55	9490.2	1	1355.7
12.8	O14290	O14290	Uncharacterized protein C9E9.04	SPAC9E9.04	sp|O14290|YF14_SCHPO Uncharacterized protein C9E9.04 OS=Schizosaccharomyces pombe (strain 972 / ATCC 24843) OX=284812 GN=SPAC9E9.04 PE=4 SV=1	21.238	13513	2	1351.3
10.9	Q09795	Q09795	Uncharacterized peptidase C22G7.01c		sp|Q09795|YAA1_SCHPO Uncharacterized peptidase C22G7.01c OS=Schizosaccharomyces pombe (strain 972 / ATCC 24843) OX=284812 GN=SPAC22G7.01c PE=3 SV=4	66.68	39108	2	1348.6
34.1	Q9P6N2	Q9P6N2	Pdp3-interacting factor 1	ptf1	sp|Q9P6N2|PTF1_SCHPO Pdp3-interacting factor 1 OS=Schizosaccharomyces pombe (strain 972 / ATCC 24843) OX=284812 GN=ptf1 PE=1 SV=1	26.271	13472	2	1347.2
9.8	O74969	O74969	High-affinity glucose transporter ght2	ght2	sp|O74969|GHT2_SCHPO High-affinity glucose transporter ght2 OS=Schizosaccharomyces pombe (strain 972 / ATCC 24843) OX=284812 GN=ght2 PE=1 SV=1	58.845	22707	1	1335.7
7.8	O14327	O14327	Polyadenylate-binding protein 2	pab2	sp|O14327|PAB2_SCHPO Polyadenylate-binding protein 2 OS=Schizosaccharomyces pombe (strain 972 / ATCC 24843) OX=284812 GN=pab2 PE=1 SV=1	18.461	8002	1	1333.7
13	Q10169	Q10169	Deubiquitination-protection protein dph1	dph1	sp|Q10169|DSK2_SCHPO Deubiquitination-protection protein dph1 OS=Schizosaccharomyces pombe (strain 972 / ATCC 24843) OX=284812 GN=dph1 PE=4 SV=1	36.819	14451	2	1313.7
18.3	P36612	P36612	26S protease regulatory subunit 4 homolog	mts2	sp|P36612|PRS4_SCHPO 26S proteasome regulatory subunit 4 homolog OS=Schizosaccharomyces pombe (strain 972 / ATCC 24843) OX=284812 GN=mts2 PE=2 SV=1	50.06	32698	2	1307.9
6.4	Q9UUI7	Q9UUI7	Putative alpha,alpha-trehalose-phosphate synthase [UDP-forming] 100 kDa subunit	SPAC22F8.05	sp|Q9UUI7|TPSY_SCHPO Putative alpha,alpha-trehalose-phosphate synthase [UDP-forming] 100 kDa subunit OS=Schizosaccharomyces pombe (strain 972 / ATCC 24843) OX=284812 GN=SPAC22F8.05 PE=1 SV=1	100.66	49692	2	1274.2
30	P11620	P11620	GTP-binding protein ypt1	ypt1	sp|P11620|YPT1_SCHPO GTP-binding protein ypt1 OS=Schizosaccharomyces pombe (strain 972 / ATCC 24843) OX=284812 GN=ypt1 PE=1 SV=2	22.816	17812	3	1272.3
1.5	O14014	O14014	Probable Rho-type GTPase-activating protein 3	rga3	sp|O14014|RGA3_SCHPO Probable Rho-type GTPase-activating protein 3 OS=Schizosaccharomyces pombe (strain 972 / ATCC 24843) OX=284812 GN=rga3 PE=1 SV=1	108.65	72544	1	1250.8
10.2	Q09671	Q09671	Putative NADPH dehydrogenase C5H10.10	SPAC5H10.10	sp|Q09671|OYEB_SCHPO Putative NADPH dehydrogenase C5H10.10 OS=Schizosaccharomyces pombe (strain 972 / ATCC 24843) OX=284812 GN=SPAC5H10.10 PE=3 SV=1	44.983	27462	1	1248.3
22.4	Q10316	Q10316	Actin-related protein 2/3 complex subunit 5	arc5	sp|Q10316|ARPC5_SCHPO Actin-related protein 2/3 complex subunit 5 OS=Schizosaccharomyces pombe (strain 972 / ATCC 24843) OX=284812 GN=arc5 PE=1 SV=1	16.91	11187	1	1242.9
36	P79010	P79010	Cytochrome c oxidase subunit 4, mitochondrial	cox4	sp|P79010|COX4_SCHPO Cytochrome c oxidase subunit 4, mitochondrial OS=Schizosaccharomyces pombe (strain 972 / ATCC 24843) OX=284812 GN=cox4 PE=2 SV=1	18.161	14833	2	1236.1
17.1	Q96WV5	Q96WV5	Putative coatomer subunit alpha	SPBPJ4664.04	sp|Q96WV5|COPA_SCHPO Putative coatomer subunit alpha OS=Schizosaccharomyces pombe (strain 972 / ATCC 24843) OX=284812 GN=SPBPJ4664.04 PE=1 SV=1	136.37	83657	5	1230.3
18.3	P36587	P36587	NADPH--cytochrome P450 reductase	ccr1	sp|P36587|NCPR_SCHPO NADPH--cytochrome P450 reductase OS=Schizosaccharomyces pombe (strain 972 / ATCC 24843) OX=284812 GN=ccr1 PE=2 SV=1	76.774	42631	3	1218
16.3	O94740	O94740	Hsp90 co-chaperone Cdc37	cdc37	sp|O94740|CDC37_SCHPO Hsp90 co-chaperone Cdc37 OS=Schizosaccharomyces pombe (strain 972 / ATCC 24843) OX=284812 GN=cdc37 PE=1 SV=1	52.553	33923	2	1211.5
14.9	P78974	P78974	Delta-aminolevulinic acid dehydratase	hem2	sp|P78974|HEM2_SCHPO Delta-aminolevulinic acid dehydratase OS=Schizosaccharomyces pombe (strain 972 / ATCC 24843) OX=284812 GN=hem2 PE=2 SV=2	36.12	19378	2	1211.1
22	Q9P7B4	Q9P7B4	Uncharacterized oxidoreductase C521.03	SPAC521.03	sp|Q9P7B4|YI13_SCHPO NADP-dependent 3-hydroxy acid dehydrogenase OS=Schizosaccharomyces pombe (strain 972 / ATCC 24843) OX=284812 GN=SPAC521.03 PE=1 SV=1	28.148	18162	1	1210.8
13.2	P87308	P87308	Protein lsb5	lsb5	sp|P87308|LSB5_SCHPO Protein lsb5 OS=Schizosaccharomyces pombe (strain 972 / ATCC 24843) OX=284812 GN=lsb5 PE=3 SV=1	34.195	20568	2	1209.9
35.1	P04910;P04909;P48003	P04910;P04909	Histone H2A-beta;Histone H2A-alpha	hta2;hta1	sp|P04910|H2A2_SCHPO Histone H2A-beta OS=Schizosaccharomyces pombe (strain 972 / ATCC 24843) OX=284812 GN=hta2 PE=1 SV=2;sp|P04909|H2A1_SCHPO Histone H2A-alpha OS=Schizosaccharomyces pombe (strain 972 / ATCC 24843) OX=284812 GN=hta1 PE=1 SV=3	13.776	6041.7	1	1208.3
14.9	O13633	O13633	Uncharacterized J domain-containing protein C17A3.05c		sp|O13633|YNF5_SCHPO Uncharacterized J domain-containing protein C17A3.05c OS=Schizosaccharomyces pombe (strain 972 / ATCC 24843) OX=284812 GN=pi041 PE=1 SV=1	46.399	24084	2	1204.2
17.3	O14361	O14361	Putative prephenate dehydratase	pha2	sp|O14361|PHA2_SCHPO Putative prephenate dehydratase OS=Schizosaccharomyces pombe (strain 972 / ATCC 24843) OX=284812 GN=pha2 PE=3 SV=2	29.871	19100	2	1193.8
10.1	P13681	P13681	Serine/threonine-protein phosphatase PP1-1	dis2	sp|P13681|PP11_SCHPO Serine/threonine-protein phosphatase PP1-1 OS=Schizosaccharomyces pombe (strain 972 / ATCC 24843) OX=284812 GN=dis2 PE=1 SV=1	37.636	20103	1	1182.5
11.8	Q10283	Q10283	3-hydroxy-3-methylglutaryl-coenzyme A reductase	hmg1	sp|Q10283|HMDH_SCHPO 3-hydroxy-3-methylglutaryl-coenzyme A reductase OS=Schizosaccharomyces pombe (strain 972 / ATCC 24843) OX=284812 GN=hmg1 PE=1 SV=2	114.88	49133	3	1169.8
12.3	Q9P6K9	Q9P6K9	Deoxyhypusine hydroxylase	lia1	sp|Q9P6K9|DOHH_SCHPO Deoxyhypusine hydroxylase OS=Schizosaccharomyces pombe (strain 972 / ATCC 24843) OX=284812 GN=lia1 PE=3 SV=1	35.689	20966	3	1164.8
20.1	P78921	P78921	Probable T-complex protein 1 subunit theta	cct8	sp|P78921|TCPQ_SCHPO Probable T-complex protein 1 subunit theta OS=Schizosaccharomyces pombe (strain 972 / ATCC 24843) OX=284812 GN=cct8 PE=2 SV=3	59.955	43057	4	1163.7
0.7	O14188	O14188	Ras GTPase-activating-like protein rng2	rng2	sp|O14188|RNG2_SCHPO Ras GTPase-activating-like protein rng2 OS=Schizosaccharomyces pombe (strain 972 / ATCC 24843) OX=284812 GN=rng2 PE=1 SV=1	171.67	96160	1	1158.6
9.3	Q10367	Q10367	ADP-ribosylation factor GTPase-activating protein glo3	glo3	sp|Q10367|GLO3_SCHPO ADP-ribosylation factor GTPase-activating protein glo3 OS=Schizosaccharomyces pombe (strain 972 / ATCC 24843) OX=284812 GN=glo3 PE=3 SV=2	52.583	33546	2	1156.7
18.3	O94634	O94634	Threonine dehydratase, mitochondrial	SPBC1677.03c	sp|O94634|THDH_SCHPO Threonine dehydratase, mitochondrial OS=Schizosaccharomyces pombe (strain 972 / ATCC 24843) OX=284812 GN=SPBC1677.03c PE=3 SV=1	66.543	35537	2	1146.3
25.1	O94350	O94350	Cystathionine beta-lyase	str3	sp|O94350|CBL_SCHPO Cystathionine beta-lyase OS=Schizosaccharomyces pombe (strain 972 / ATCC 24843) OX=284812 GN=str3 PE=3 SV=4	42.773	21715	2	1142.9
23.4	O74790	O74790	Monothiol glutaredoxin-4	grx4	sp|O74790|GLRX4_SCHPO Monothiol glutaredoxin-4 OS=Schizosaccharomyces pombe (strain 972 / ATCC 24843) OX=284812 GN=grx4 PE=1 SV=1	27.099	12566	2	1142.3
4.3	Q9USJ7	Q9USJ7	Negative regulator of ofd1	nro1	sp|Q9USJ7|ETT1_SCHPO Negative regulator of ofd1 OS=Schizosaccharomyces pombe (strain 972 / ATCC 24843) OX=284812 GN=nro1 PE=1 SV=1	44.449	15822	1	1130.2
23.7	O74445;O60058	O74445	Probable 26S protease subunit rpt4	rpt4	sp|O74445|PRS10_SCHPO Probable 26S proteasome subunit rpt4 OS=Schizosaccharomyces pombe (strain 972 / ATCC 24843) OX=284812 GN=rpt4 PE=3 SV=2	43.608	25363	3	1102.7
21.3	Q9UT21	Q9UT21	Uncharacterized GTP-binding protein C9.07c	SPAC9.07c	sp|Q9UT21|YFY7_SCHPO Uncharacterized GTP-binding protein C9.07c OS=Schizosaccharomyces pombe (strain 972 / ATCC 24843) OX=284812 GN=SPAC9.07c PE=2 SV=1	40.375	27430	3	1097.2
16.6	Q09116	Q09116	Septin homolog spn2	spn2	sp|Q09116|SPN2_SCHPO Septin homolog spn2 OS=Schizosaccharomyces pombe (strain 972 / ATCC 24843) OX=284812 GN=spn2 PE=1 SV=2	38.129	21777	1	1088.8
9	O13809	O13809	Uncharacterized FAD-binding protein C17H9.12c	SPAC17H9.12c	sp|O13809|YE0C_SCHPO Uncharacterized FAD-binding protein C17H9.12c OS=Schizosaccharomyces pombe (strain 972 / ATCC 24843) OX=284812 GN=SPAC17H9.12c PE=3 SV=1	29.375	16291	1	1086
5.8	O94466	O94466	Probable Rho-GTPase-activating protein 7	rga7	sp|O94466|RGA7_SCHPO Probable Rho-GTPase-activating protein 7 OS=Schizosaccharomyces pombe (strain 972 / ATCC 24843) OX=284812 GN=rga7 PE=1 SV=1	76.678	41269	3	1086
5.4	Q9P6R6	Q9P6R6	ATP synthase subunit delta, mitochondrial	atp16	sp|Q9P6R6|ATPD_SCHPO ATP synthase subunit delta, mitochondrial OS=Schizosaccharomyces pombe (strain 972 / ATCC 24843) OX=284812 GN=atp16 PE=3 SV=2	18.41	11937	1	1085.2
31.3	P41836	P41836	26S protease regulatory subunit 8 homolog	let1	sp|P41836|PRS8_SCHPO 26S proteasome regulatory subunit 8 homolog OS=Schizosaccharomyces pombe (strain 972 / ATCC 24843) OX=284812 GN=let1 PE=3 SV=1	45.069	25591	3	1066.3
22.3	P78761	P78761	Cytochrome b-c1 complex subunit 2, mitochondrial	qcr2	sp|P78761|QCR2_SCHPO Cytochrome b-c1 complex subunit 2, mitochondrial OS=Schizosaccharomyces pombe (strain 972 / ATCC 24843) OX=284812 GN=qcr2 PE=2 SV=2	45.651	27549	2	1059.6
19.5	O14164	O14164	Eukaryotic translation initiation factor 3 subunit C	nip1	sp|O14164|EIF3C_SCHPO Eukaryotic translation initiation factor 3 subunit C OS=Schizosaccharomyces pombe (strain 972 / ATCC 24843) OX=284812 GN=nip1 PE=1 SV=2	104.37	43408	2	1058.7
10.3	Q9P7F2;O42890	Q9P7F2	Copper amine oxidase 1	cao1	sp|Q9P7F2|CAO1_SCHPO Copper amine oxidase 1 OS=Schizosaccharomyces pombe (strain 972 / ATCC 24843) OX=284812 GN=cao1 PE=1 SV=1	81.24	34932	3	1058.5
13.8	O74919	O74919	RNA-binding protein rnc1	rnc1	sp|O74919|RNC1_SCHPO RNA-binding protein rnc1 OS=Schizosaccharomyces pombe (strain 972 / ATCC 24843) OX=284812 GN=rnc1 PE=1 SV=1	43.377	18815	2	1045.3
22.4	O94601	O94601	Uncharacterized protein C622.14	SPCC622.14	sp|O94601|YC8E_SCHPO Uncharacterized protein C622.14 OS=Schizosaccharomyces pombe (strain 972 / ATCC 24843) OX=284812 GN=SPCC622.14 PE=4 SV=2	35.518	18734	3	1040.8
21.3	O94246	O94246	Putative glutamate--cysteine ligase regulatory subunit	SPCC737.06c	sp|O94246|GSH0_SCHPO Putative glutamate--cysteine ligase regulatory subunit OS=Schizosaccharomyces pombe (strain 972 / ATCC 24843) OX=284812 GN=SPCC737.06c PE=3 SV=1	32.66	15537	1	1035.8
21	P87167	P87167	Uba3-binding protein but2	but2	sp|P87167|BUT2_SCHPO Uba3-binding protein but2 OS=Schizosaccharomyces pombe (strain 972 / ATCC 24843) OX=284812 GN=but2 PE=1 SV=1	43.625	20632	1	1031.6
36.1	O14112	O14112	40S ribosomal protein S10-A	rps10a	sp|O14112|RS10A_SCHPO 40S ribosomal protein S10-A OS=Schizosaccharomyces pombe (strain 972 / ATCC 24843) OX=284812 GN=rps1001 PE=3 SV=1	16.275	7215.6	3	1030.8
7.4	O43049	O43049	Serine/threonine-protein phosphatase T	ppt1	sp|O43049|PPT1_SCHPO Serine/threonine-protein phosphatase T OS=Schizosaccharomyces pombe (strain 972 / ATCC 24843) OX=284812 GN=ppt1 PE=3 SV=2	53.29	23647	2	1028.1
18.4	Q92399	Q92399	DNA-directed RNA polymerases I, II, and III subunit RPABC3	rpb8	sp|Q92399|RPAB3_SCHPO DNA-directed RNA polymerases I, II, and III subunit RPABC3 OS=Schizosaccharomyces pombe (strain 972 / ATCC 24843) OX=284812 GN=rpb8 PE=1 SV=2	14.3	6124.3	1	1020.7
1.4	Q09920	Q09920	Iron transport multicopper oxidase fio1	fio1	sp|Q09920|FIO1_SCHPO Iron transport multicopper oxidase fio1 OS=Schizosaccharomyces pombe (strain 972 / ATCC 24843) OX=284812 GN=fio1 PE=3 SV=1	69.907	13000	1	999.99
14.4	O59866	O59866	Dolichyl-diphosphooligosaccharide--protein glycosyltransferase subunit wbp1	wbp1	sp|O59866|OSTB_SCHPO Dolichyl-diphosphooligosaccharide--protein glycosyltransferase subunit wbp1 OS=Schizosaccharomyces pombe (strain 972 / ATCC 24843) OX=284812 GN=wbp1 PE=2 SV=2	48.898	21991	1	999.59
9.6	Q9P7E8	Q9P7E8	Protein app1	app1	sp|Q9P7E8|APP1_SCHPO Protein app1 OS=Schizosaccharomyces pombe (strain 972 / ATCC 24843) OX=284812 GN=app1 PE=2 SV=1	91.136	39612	2	990.3
24	O42644	O42644	CTP synthase	ura7	sp|O42644|PYRG_SCHPO CTP synthase OS=Schizosaccharomyces pombe (strain 972 / ATCC 24843) OX=284812 GN=ura7 PE=3 SV=1	66.867	23758	4	989.9
10.4	Q09785	Q09785	Putative glycine dehydrogenase (decarboxylating), mitochondrial	gcv2	sp|Q09785|GCSP_SCHPO Putative glycine dehydrogenase (decarboxylating), mitochondrial OS=Schizosaccharomyces pombe (strain 972 / ATCC 24843) OX=284812 GN=gcv2 PE=3 SV=2	114.23	51449	2	989.39
8.7	O94374	O94374	Importin subunit alpha-2	imp1	sp|O94374|IMA2_SCHPO Importin subunit alpha-2 OS=Schizosaccharomyces pombe (strain 972 / ATCC 24843) OX=284812 GN=imp1 PE=1 SV=1	59.852	18507	1	974.06
4.3	Q9USK8;Q9Y719	Q9USK8	Cell wall alpha-1,3-glucan synthase ags1	ags1	sp|Q9USK8|AGS1_SCHPO Cell wall alpha-1,3-glucan synthase ags1 OS=Schizosaccharomyces pombe (strain 972 / ATCC 24843) OX=284812 GN=ags1 PE=1 SV=3	272.1	86593	7	972.95
12.3	P87140	P87140	Probable coatomer subunit gamma	sec21	sp|P87140|COPG_SCHPO Probable coatomer subunit gamma OS=Schizosaccharomyces pombe (strain 972 / ATCC 24843) OX=284812 GN=sec21 PE=1 SV=1	100.93	39841	3	971.72
23.7	O14359	O14359	Uncharacterized AIM2 family protein C30D10.14	SPBC30D10.14	sp|O14359|YB4E_SCHPO Uncharacterized AIM2 family protein C30D10.14 OS=Schizosaccharomyces pombe (strain 972 / ATCC 24843) OX=284812 GN=SPBC30D10.14 PE=3 SV=1	27.414	14162	1	944.11
7.3	Q10195	Q10195	Uncharacterized protein C11C11.06c	SPBC11C11.06c	sp|Q10195|YBY6_SCHPO Uncharacterized protein C11C11.06c OS=Schizosaccharomyces pombe (strain 972 / ATCC 24843) OX=284812 GN=SPBC11C11.06c PE=4 SV=1	19.126	8494.8	1	943.87
9	O14019	O14019	Serine/threonine-protein kinase hal4	hal4	sp|O14019|HAL4_SCHPO Serine/threonine-protein kinase hal4 OS=Schizosaccharomyces pombe (strain 972 / ATCC 24843) OX=284812 GN=hal4 PE=1 SV=1	69.114	27081	2	933.81
23.5	Q9UT59	Q9UT59	Putative uncharacterized oxidoreductase C513.07	SPAC513.07	sp|Q9UT59|YKJ7_SCHPO Putative uncharacterized oxidoreductase C513.07 OS=Schizosaccharomyces pombe (strain 972 / ATCC 24843) OX=284812 GN=SPAC513.07 PE=3 SV=1	37.461	15856	1	932.68
9.6	Q09768	Q09768	Glutamate--cysteine ligase	gcs1	sp|Q09768|GSH1_SCHPO Glutamate--cysteine ligase OS=Schizosaccharomyces pombe (strain 972 / ATCC 24843) OX=284812 GN=gcs1 PE=3 SV=1	76.522	34773	2	915.08
22.2	P40235;P40236	P40235	Casein kinase I homolog hhp1	hhp1	sp|P40235|HHP1_SCHPO Casein kinase I homolog hhp1 OS=Schizosaccharomyces pombe (strain 972 / ATCC 24843) OX=284812 GN=hhp1 PE=2 SV=1	42.45	17267	2	908.77
11.9	P08647	P08647	Ras-like protein 1	ras1	sp|P08647|RAS_SCHPO Ras-like protein 1 OS=Schizosaccharomyces pombe (strain 972 / ATCC 24843) OX=284812 GN=ras1 PE=1 SV=2	24.734	11718	1	901.35
11.9	Q10414	Q10414	CWF19-like protein mug161	mug161	sp|Q10414|MU161_SCHPO CWF19-like protein mug161 OS=Schizosaccharomyces pombe (strain 972 / ATCC 24843) OX=284812 GN=mug161 PE=1 SV=1	63.216	24302	1	900.09
5.6	Q10138	Q10138	CRAL-TRIO domain-containing protein C3H8.02	SPAC3H8.02	sp|Q10138|YAS2_SCHPO CRAL-TRIO domain-containing protein C3H8.02 OS=Schizosaccharomyces pombe (strain 972 / ATCC 24843) OX=284812 GN=SPAC3H8.02 PE=1 SV=1	51.473	22962	1	883.14
12.6	O14301	O14301	Uncharacterized WD repeat-containing protein C9G1.05	SPAC9G1.05	sp|O14301|YE85_SCHPO Uncharacterized WD repeat-containing protein C9G1.05 OS=Schizosaccharomyces pombe (strain 972 / ATCC 24843) OX=284812 GN=SPAC9G1.05 PE=3 SV=1	65.266	29033	2	879.79
20.9	O74865	O74865	Diphthine methyltransferase	rrt2	sp|O74865|DPH7_SCHPO Diphthine methyltransferase OS=Schizosaccharomyces pombe (strain 972 / ATCC 24843) OX=284812 GN=rrt2 PE=3 SV=2	37.04	18215	2	867.39
28.8	O94305	O94305	Putative monoglyceride lipase	SPCC5E4.05c	sp|O94305|MGLL_SCHPO Putative monoglyceride lipase OS=Schizosaccharomyces pombe (strain 972 / ATCC 24843) OX=284812 GN=mgl1 PE=1 SV=1	41.623	20775	2	865.64
19.1	Q9UT74	Q9UT74	Homoaconitase, mitochondrial	lys2	sp|Q9UT74|LYS4_SCHPO Homoaconitase, mitochondrial OS=Schizosaccharomyces pombe (strain 972 / ATCC 24843) OX=284812 GN=lys2 PE=3 SV=1	78.024	34565	3	864.13
28	Q10081	Q10081	UPF0039 protein C11D3.02c	SPAC11D3.02c	sp|Q10081|YAO2_SCHPO UPF0039 protein C11D3.02c OS=Schizosaccharomyces pombe (strain 972 / ATCC 24843) OX=284812 GN=SPAC11D3.02c PE=3 SV=1	17.414	10139	1	844.88
6.2	O74511	O74511	Extragenic suppressor of kinetochore protein 1	ekc1	sp|O74511|EKC1_SCHPO Extragenic suppressor of kinetochore protein 1 OS=Schizosaccharomyces pombe (strain 972 / ATCC 24843) OX=284812 GN=ekc1 PE=1 SV=2	94.966	28111	1	826.79
9.4	Q10058	Q10058	Putative oxidoreductase C1F5.03c	SPAC1F5.03c	sp|Q10058|YAM3_SCHPO Putative oxidoreductase C1F5.03c OS=Schizosaccharomyces pombe (strain 972 / ATCC 24843) OX=284812 GN=SPAC1F5.03c PE=3 SV=1	41.501	15483	2	814.9
19.5	Q9UUB1	Q9UUB1	6,7-dimethyl-8-ribityllumazine synthase	rib4	sp|Q9UUB1|RIB4_SCHPO 6,7-dimethyl-8-ribityllumazine synthase OS=Schizosaccharomyces pombe (strain 972 / ATCC 24843) OX=284812 GN=rib4 PE=1 SV=1	17.188	7322.1	1	813.57
13.2	Q9UT55	Q9UT55	Protein-glutamate O-methyltransferase SPCC1393.13	SPAC806.04c	sp|Q9UT55|ART1A_SCHPO Damage-control phosphatase SPAC806.04c OS=Schizosaccharomyces pombe (strain 972 / ATCC 24843) OX=284812 GN=SPAC806.04c PE=3 SV=2	49.894	17822	2	810.09
6.6	Q9P789	Q9P789	Pumilio domain-containing protein P35G2.14	SPBP35G2.14	sp|Q9P789|YN8E_SCHPO Pumilio domain-containing protein P35G2.14 OS=Schizosaccharomyces pombe (strain 972 / ATCC 24843) OX=284812 GN=SPBP35G2.14 PE=1 SV=2	114.23	34557	2	803.66
6	Q9P6Q2	Q9P6Q2	Enolase-phosphatase E1	utr4	sp|Q9P6Q2|ENOPH_SCHPO Enolase-phosphatase E1 OS=Schizosaccharomyces pombe (strain 972 / ATCC 24843) OX=284812 GN=utr4 PE=3 SV=1	24.423	11883	1	792.17
10.4	P78789	P78789	Uncharacterized protein C1919.03c	SPCC1919.03c	sp|P78789|AAKB_SCHPO 5-AMP-activated protein kinase subunit beta OS=Schizosaccharomyces pombe (strain 972 / ATCC 24843) OX=284812 GN=amk2 PE=1 SV=2	32.969	10262	1	789.37
9.3	Q10452	Q10452	Protein kinase gsk3	gsk3	sp|Q10452|GSK3_SCHPO Protein kinase gsk3 OS=Schizosaccharomyces pombe (strain 972 / ATCC 24843) OX=284812 GN=gsk3 PE=1 SV=3	44.165	14853	1	781.75
6	O74475;Q10287;O13967	O74475	1,3-beta-glucan synthase component bgs4	bgs4	sp|O74475|BGS4_SCHPO 1,3-beta-glucan synthase component bgs4 OS=Schizosaccharomyces pombe (strain 972 / ATCC 24843) OX=284812 GN=bgs4 PE=1 SV=1	225.18	58529	5	780.39
8.6	O74988	O74988	Cytochrome c oxidase polypeptide 5, mitochondrial	cox5	sp|O74988|COX5_SCHPO Cytochrome c oxidase polypeptide 5, mitochondrial OS=Schizosaccharomyces pombe (strain 972 / ATCC 24843) OX=284812 GN=cox5 PE=3 SV=2	20.735	8503	1	773
10.6	Q10410	Q10410	Probable ADP-ribosylation factor-binding protein C1F3.05	SPAC1F3.05	sp|Q10410|YD85_SCHPO Probable ADP-ribosylation factor-binding protein C1F3.05 OS=Schizosaccharomyces pombe (strain 972 / ATCC 24843) OX=284812 GN=SPAC1F3.05 PE=3 SV=1	56.789	14589	2	767.82
12.3	O74762	O74762	26S proteasome regulatory subunit rpn2	rpn2	sp|O74762|RPN2_SCHPO 26S proteasome regulatory subunit rpn2 OS=Schizosaccharomyces pombe (strain 972 / ATCC 24843) OX=284812 GN=rpn2 PE=1 SV=1	107.28	38992	3	764.55
8.3	Q9UUH4	Q9UUH4	Methylsterol monooxygenase	erg25	sp|Q9UUH4|MSMO_SCHPO Methylsterol monooxygenase OS=Schizosaccharomyces pombe (strain 972 / ATCC 24843) OX=284812 GN=erg25 PE=3 SV=1	35.802	9102.1	1	758.51
30.2	O94331	O94331	Orotate phosphoribosyltransferase	ura5	sp|O94331|PYRE_SCHPO Orotate phosphoribosyltransferase OS=Schizosaccharomyces pombe (strain 972 / ATCC 24843) OX=284812 GN=ura5 PE=3 SV=1	23.716	8339.4	2	758.13
33.1	O74471	O74471	Cytochrome c oxidase subunit 6A, mitochondrial	cox13	sp|O74471|COX13_SCHPO Cytochrome c oxidase subunit 13, mitochondrial OS=Schizosaccharomyces pombe (strain 972 / ATCC 24843) OX=284812 GN=cox13 PE=3 SV=1	15.199	6064.5	1	758.06
4.1	Q9UT18	Q9UT18	Thiamine transporter thi9	thi9	sp|Q9UT18|THI9_SCHPO Thiamine transporter thi9 OS=Schizosaccharomyces pombe (strain 972 / ATCC 24843) OX=284812 GN=thi9 PE=1 SV=1	65.069	11146	2	743.05
5.5	Q9UT87	Q9UT87	54S ribosomal protein subunit img1, mitochondrial	img1	sp|Q9UT87|IMG1_SCHPO 54S ribosomal protein subunit img1, mitochondrial OS=Schizosaccharomyces pombe (strain 972 / ATCC 24843) OX=284812 GN=img1 PE=3 SV=1	21.373	6545.3	1	727.25
15.3	P40374	P40374	Imidazoleglycerol-phosphate dehydratase	his5	sp|P40374|HIS7_SCHPO Imidazoleglycerol-phosphate dehydratase OS=Schizosaccharomyces pombe (strain 972 / ATCC 24843) OX=284812 GN=his5 PE=1 SV=1	23.52	7991.2	1	726.47
26.7	Q9Y7R8	Q9Y7R8	Malate dehydrogenase, mitochondrial	MDH1	sp|Q9Y7R8|MDHM_SCHPO Malate dehydrogenase, mitochondrial OS=Schizosaccharomyces pombe (strain 972 / ATCC 24843) OX=284812 GN=MDH1 PE=3 SV=1	35.787	13798	2	726.19
15.8	O13871	O13871	Uncharacterized methyltransferase C1B3.06c	SPAC1B3.06c	sp|O13871|YE16_SCHPO Uncharacterized methyltransferase C1B3.06c OS=Schizosaccharomyces pombe (strain 972 / ATCC 24843) OX=284812 GN=SPAC1B3.06c PE=3 SV=1	31.773	10703	1	713.55
15.5	O59739	O59739	BAG family molecular chaperone regulator 1B	bag102	sp|O59739|BAG1B_SCHPO BAG family molecular chaperone regulator 1B OS=Schizosaccharomyces pombe (strain 972 / ATCC 24843) OX=284812 GN=bag102 PE=1 SV=1	23.325	8552.6	1	712.71
6.8	Q9UTI0	Q9UTI0	Probable dihydroorotase	ura2	sp|Q9UTI0|PYRC_SCHPO Probable dihydroorotase OS=Schizosaccharomyces pombe (strain 972 / ATCC 24843) OX=284812 GN=ura2 PE=3 SV=1	37.552	10665	1	711.01
16.4	Q10318	Q10318	Putative dihydroxy-acid dehydratase, mitochondrial	SPAC17G8.06c	sp|Q10318|ILV3_SCHPO Dihydroxy-acid dehydratase, mitochondrial OS=Schizosaccharomyces pombe (strain 972 / ATCC 24843) OX=284812 GN=SPAC17G8.06c PE=2 SV=1	63.926	21127	3	704.22
3.1	O13801	O13801	Uncharacterized RNA-binding protein C17H9.04c	SPAC17H9.04c	sp|O13801|DRI1_SCHPO RNA-binding protein involved in heterochromatin assembly dri1 OS=Schizosaccharomyces pombe (strain 972 / ATCC 24843) OX=284812 GN=dri1 PE=1 SV=1	66.396	13980	1	699.02
4.2	O94659	O94659	Probable nucleolar GTP-binding protein 1	nog1	sp|O94659|NOG1_SCHPO Probable nucleolar GTP-binding protein 1 OS=Schizosaccharomyces pombe (strain 972 / ATCC 24843) OX=284812 GN=nog1 PE=1 SV=2	72.798	22992	1	696.73
16.4	Q9C0X6	Q9C0X6	RuvB-like helicase 1	rvb1	sp|Q9C0X6|RUVB1_SCHPO RuvB-like helicase 1 OS=Schizosaccharomyces pombe (strain 972 / ATCC 24843) OX=284812 GN=rvb1 PE=3 SV=1	50.052	15193	1	690.58
10.9	Q9URW6	Q9URW6	SH3 domain-containing protein PJ696.02	SPAPJ696.02	sp|Q9URW6|YIE2_SCHPO SH3 domain-containing protein PJ696.02 OS=Schizosaccharomyces pombe (strain 972 / ATCC 24843) OX=284812 GN=SPAPJ696.02 PE=1 SV=1	46.373	14436	2	687.41
8.6	O94280	O94280	UPF0674 endoplasmic reticulum membrane protein C2G5.01	SPBC2G5.01	sp|O94280|YGX1_SCHPO UPF0674 endoplasmic reticulum membrane protein C2G5.01 OS=Schizosaccharomyces pombe (strain 972 / ATCC 24843) OX=284812 GN=SPBC2G5.01 PE=3 SV=1	43.097	9518.8	1	679.91
1.7	O74798	O74798	Putative arrestin-related trafficking adapter C2D10.04	SPBC2D10.04	sp|O74798|ALY2_SCHPO Putative arrestin-related trafficking adapter C2D10.04 OS=Schizosaccharomyces pombe (strain 972 / ATCC 24843) OX=284812 GN=SPBC2D10.04 PE=1 SV=1	72.731	19689	1	678.94
22.5	Q9P7X1	Q9P7X1	Probable mitochondrial-processing peptidase subunit beta	qcr1	sp|Q9P7X1|MPPB_SCHPO Probable mitochondrial-processing peptidase subunit beta OS=Schizosaccharomyces pombe (strain 972 / ATCC 24843) OX=284812 GN=qcr1 PE=2 SV=1	50.737	16926	3	677.04
7.2	O13844	O13844	Uncharacterized mitochondrial carrier C19G12.05	SPAC19G12.05	sp|O13844|YFG5_SCHPO Uncharacterized mitochondrial carrier C19G12.05 OS=Schizosaccharomyces pombe (strain 972 / ATCC 24843) OX=284812 GN=SPAC19G12.05 PE=3 SV=1	31.573	12145	1	674.69
8.3	Q09146	Q09146	Brefeldin A resistance protein	hba1	sp|Q09146|HBA1_SCHPO Brefeldin A resistance protein OS=Schizosaccharomyces pombe (strain 972 / ATCC 24843) OX=284812 GN=hba1 PE=1 SV=1	43.2	12738	2	670.43
2.5	Q01663	Q01663	AP-1-like transcription factor	pap1	sp|Q01663|AP1_SCHPO AP-1-like transcription factor OS=Schizosaccharomyces pombe (strain 972 / ATCC 24843) OX=284812 GN=pap1 PE=1 SV=2	61.531	15175	1	659.77
25.7	P35669	P35669	Glutathione synthetase large chain	gsa1	sp|P35669|GSHB_SCHPO Glutathione synthetase large chain OS=Schizosaccharomyces pombe (strain 972 / ATCC 24843) OX=284812 GN=gsa1 PE=1 SV=2	56.152	21037	2	657.41
8.8	Q9Y809	Q9Y809	N-terminal acetyltransferase B complex subunit arm1	arm1	sp|Q9Y809|NAA25_SCHPO N-terminal acetyltransferase B complex subunit arm1 OS=Schizosaccharomyces pombe (strain 972 / ATCC 24843) OX=284812 GN=arm1 PE=3 SV=1	92.456	29396	2	653.25
9.1	Q9P6K0	Q9P6K0	Uncharacterized HTH La-type RNA-binding protein C1527.03	SPAC1527.03	sp|Q9P6K0|YLA3_SCHPO Uncharacterized HTH La-type RNA-binding protein C1527.03 OS=Schizosaccharomyces pombe (strain 972 / ATCC 24843) OX=284812 GN=SPAC1527.03 PE=1 SV=1	53.232	11700	1	649.99
9.3	Q09860	Q09860	Probable cysteine--tRNA ligase		sp|Q09860|SYC_SCHPO Probable cysteine--tRNA ligase OS=Schizosaccharomyces pombe (strain 972 / ATCC 24843) OX=284812 GN=SPAC29E6.06c PE=3 SV=1	85.554	21927	1	644.9
17.8	O13940	O13940	Probable low-specificity L-threonine aldolase	gly1	sp|O13940|GLY1_SCHPO Probable low-specificity L-threonine aldolase OS=Schizosaccharomyces pombe (strain 972 / ATCC 24843) OX=284812 GN=gly1 PE=3 SV=1	41.318	13530	1	644.29
6.4	Q92372	Q92372	Replication factor A protein 1	ssb1	sp|Q92372|RFA1_SCHPO Replication factor A protein 1 OS=Schizosaccharomyces pombe (strain 972 / ATCC 24843) OX=284812 GN=ssb1 PE=1 SV=1	68.196	19284	1	642.8
13.8	Q09740	Q09740	Probable glutamine--fructose-6-phosphate aminotransferase [isomerizing]		sp|Q09740|GFA1_SCHPO Probable glutamine--fructose-6-phosphate aminotransferase [isomerizing] OS=Schizosaccharomyces pombe (strain 972 / ATCC 24843) OX=284812 GN=SPBC12C2.11 PE=3 SV=2	77.321	22968	2	638
2.7	Q09897	Q09897	Chitin synthase regulatory factor 3	chr3	sp|Q09897|CHR3_SCHPO Chitin synthase regulatory factor 3 OS=Schizosaccharomyces pombe (strain 972 / ATCC 24843) OX=284812 GN=chr3 PE=1 SV=1	103.18	33082	2	636.2
11.2	O74496	O74496	Coatomer subunit delta	ret2	sp|O74496|COPD_SCHPO Coatomer subunit delta OS=Schizosaccharomyces pombe (strain 972 / ATCC 24843) OX=284812 GN=ret2 PE=3 SV=1	27.097	5079.4	1	634.93
6	O74786	O74786	Protein transport protein sec9	sec9	sp|O74786|SEC9_SCHPO Protein transport protein sec9 OS=Schizosaccharomyces pombe (strain 972 / ATCC 24843) OX=284812 GN=sec9 PE=1 SV=1	46.43	10131	2	633.22
4.2	Q09899	Q09899	Porphobilinogen deaminase	hem3	sp|Q09899|HEM3_SCHPO Porphobilinogen deaminase OS=Schizosaccharomyces pombe (strain 972 / ATCC 24843) OX=284812 GN=hem3 PE=1 SV=2	36.826	11396	1	633.13
9.1	O94699	O94699	Mitochondrial outer membrane protein C83.16c	SPBC83.16c	sp|O94699|IML2_SCHPO Inclusion body clearance protein IML2 OS=Schizosaccharomyces pombe (strain 972 / ATCC 24843) OX=284812 GN=SPBC83.16c PE=3 SV=1	63.484	15603	1	624.14
4.9	Q9UTH9	Q9UTH9	tRNA-dihydrouridine(47) synthase [NAD(P)(+)]	dus3	sp|Q9UTH9|DUS3_SCHPO tRNA-dihydrouridine(47) synthase [NAD(P)(+)] OS=Schizosaccharomyces pombe (strain 972 / ATCC 24843) OX=284812 GN=dus3 PE=3 SV=1	69.698	19926	2	603.83
23.9	O14224	O14224	Rho GDP-dissociation inhibitor	SPAC6F12.06	sp|O14224|GDIR_SCHPO Rho GDP-dissociation inhibitor OS=Schizosaccharomyces pombe (strain 972 / ATCC 24843) OX=284812 GN=SPAC6F12.06 PE=1 SV=1	23.031	4828.6	1	603.57
9.9	O14065	O14065	Uncharacterized protein C962.01		sp|O14065|YC31_SCHPO Uncharacterized protein C962.01 OS=Schizosaccharomyces pombe (strain 972 / ATCC 24843) OX=284812 GN=SPCC962.01 PE=2 SV=3	156.03	43434	4	603.25
9.4	Q01112	Q01112	Cell division control protein 42 homolog	cdc42	sp|Q01112|CDC42_SCHPO Cell division control protein 42 homolog OS=Schizosaccharomyces pombe (strain 972 / ATCC 24843) OX=284812 GN=cdc42 PE=1 SV=1	21.329	4804.4	1	600.55
16.1	Q9P7D4	Q9P7D4	Homocitrate dehydratase, mitochondrial	SPBP4H10.15	sp|Q9P7D4|ACON2_SCHPO Homocitrate dehydratase, mitochondrial OS=Schizosaccharomyces pombe (strain 972 / ATCC 24843) OX=284812 GN=SPBP4H10.15 PE=3 SV=3	99.9	23359	3	598.96
18.6	O13637	O13637	Protein transport protein sec31	sec31	sp|O13637|SEC31_SCHPO Protein transport protein sec31 OS=Schizosaccharomyces pombe (strain 972 / ATCC 24843) OX=284812 GN=sec31 PE=1 SV=1	132.5	42300	5	595.77
23.9	Q09885	Q09885	Survival factor 1	svf1	sp|Q09885|SVF1_SCHPO Survival factor 1 OS=Schizosaccharomyces pombe (strain 972 / ATCC 24843) OX=284812 GN=svf1 PE=3 SV=1	42.961	11111	1	584.81
2.1	P41888	P41888	Thiamine pyrophosphokinase	tnr3	sp|P41888|TNR3_SCHPO Thiamine pyrophosphokinase OS=Schizosaccharomyces pombe (strain 972 / ATCC 24843) OX=284812 GN=tnr3 PE=4 SV=1	64.235	16815	1	579.82
13.9	P87157	P87157	Probable ADP-ribosylation factor-binding protein C25H2.16c	SPBC25H2.16c	sp|P87157|YB0G_SCHPO Probable ADP-ribosylation factor-binding protein C25H2.16c OS=Schizosaccharomyces pombe (strain 972 / ATCC 24843) OX=284812 GN=SPBC25H2.16c PE=1 SV=1	59.481	12704	1	577.47
16	O94513	O94513	Eukaryotic translation initiation factor 3 subunit E	int6	sp|O94513|EIF3E_SCHPO Eukaryotic translation initiation factor 3 subunit E OS=Schizosaccharomyces pombe (strain 972 / ATCC 24843) OX=284812 GN=int6 PE=1 SV=1	57.114	10371	1	576.15
10.7	O74419	O74419	Uncharacterized protein C162.02c	SPCC162.02c	sp|O74419|YQ52_SCHPO Uncharacterized protein C162.02c OS=Schizosaccharomyces pombe (strain 972 / ATCC 24843) OX=284812 GN=SPCC162.02c PE=2 SV=1	109.85	32731	3	564.33
3.7	O74943	O74943	Uncharacterized protein C553.06	SPCC553.06	sp|O74943|YJB6_SCHPO Uncharacterized protein C553.06 OS=Schizosaccharomyces pombe (strain 972 / ATCC 24843) OX=284812 GN=SPCC553.06 PE=3 SV=1	29.329	5511.1	1	551.11
7.6	O94362	O94362	Uncharacterized GTP-binding protein C428.15	SPBC428.15	sp|O94362|YHOF_SCHPO Uncharacterized GTP-binding protein C428.15 OS=Schizosaccharomyces pombe (strain 972 / ATCC 24843) OX=284812 GN=SPBC428.15 PE=3 SV=1	44.461	12024	2	546.55
2.8	O74536	O74536	SNF1-like protein kinase ssp2	ssp2	sp|O74536|SNF1_SCHPO SNF1-like protein kinase ssp2 OS=Schizosaccharomyces pombe (strain 972 / ATCC 24843) OX=284812 GN=ssp2 PE=1 SV=1	65.995	17857	1	541.13
5	P78790	P78790	Probable electron transfer flavoprotein subunit alpha, mitochondrial	SPAC27D7.06	sp|P78790|ETFA_SCHPO Probable electron transfer flavoprotein subunit alpha, mitochondrial OS=Schizosaccharomyces pombe (strain 972 / ATCC 24843) OX=284812 GN=SPAC27D7.06 PE=2 SV=3	36.393	9129.6	1	537.04
11.6	Q9Y7X4	Q9Y7X4	Uncharacterized membrane protein C365.16	SPBC365.16	sp|Q9Y7X4|YGRG_SCHPO Uncharacterized membrane protein C365.16 OS=Schizosaccharomyces pombe (strain 972 / ATCC 24843) OX=284812 GN=SPBC365.16 PE=4 SV=1	30.406	5870.5	1	533.68
4.7	Q10245	Q10245	Very-long-chain 3-oxoacyl-CoA reductase	SPAC4G9.15	sp|Q10245|MKAR_SCHPO Very-long-chain 3-oxoacyl-CoA reductase OS=Schizosaccharomyces pombe (strain 972 / ATCC 24843) OX=284812 GN=SPAC4G9.15 PE=3 SV=1	37.307	10038	1	528.31
16.8	P78875	P78875	Trehalose-phosphatase	tpp1	sp|P78875|TPP1_SCHPO Trehalose-phosphatase OS=Schizosaccharomyces pombe (strain 972 / ATCC 24843) OX=284812 GN=tpp1 PE=1 SV=2	93.876	21123	4	528.06
14.2	Q7Z9I2;Q7Z9I4	Q7Z9I2	Uncharacterized oxidoreductase C663.09c	SPCC663.09c	sp|Q7Z9I2|YCP9_SCHPO Uncharacterized oxidoreductase C663.09c OS=Schizosaccharomyces pombe (strain 972 / ATCC 24843) OX=284812 GN=SPCC663.09c PE=3 SV=1	27.946	7859.1	1	523.94
6.5	P21565	P21565	Signal recognition particle 54 kDa protein homolog	srp54	sp|P21565|SRP54_SCHPO Signal recognition particle 54 kDa protein homolog OS=Schizosaccharomyces pombe (strain 972 / ATCC 24843) OX=284812 GN=srp54 PE=1 SV=1	56.697	14132	1	523.41
16.8	Q10094	Q10094	Uncharacterized protein C11D3.15	SPAC11D3.15	sp|Q10094|YAOF_SCHPO Uncharacterized protein C11D3.15 OS=Schizosaccharomyces pombe (strain 972 / ATCC 24843) OX=284812 GN=SPAC11D3.15 PE=3 SV=1	143.72	37989	4	520.4
14.9	Q9P4X4	Q9P4X4	Probable vesicular-fusion protein sec17 homolog	sec17	sp|Q9P4X4|SEC17_SCHPO Probable vesicular-fusion protein sec17 homolog OS=Schizosaccharomyces pombe (strain 972 / ATCC 24843) OX=284812 GN=sec17 PE=1 SV=1	32.222	8279	1	517.44
9.7	O14072	O14072	Manganese-transporting ATPase 4	cta4	sp|O14072|ATC4_SCHPO Endoplasmic reticulum transmembrane helix translocase OS=Schizosaccharomyces pombe (strain 972 / ATCC 24843) OX=284812 GN=cta4 PE=1 SV=1	136.26	33349	3	513.06
7.9	O13750	O13750	Probable succinyl-CoA ligase [ADP-forming] subunit alpha, mitochondrial	SPAC16E8.17c	sp|O13750|SUCA_SCHPO Succinate--CoA ligase [ADP-forming] subunit alpha, mitochondrial OS=Schizosaccharomyces pombe (strain 972 / ATCC 24843) OX=284812 GN=SPAC16E8.17c PE=3 SV=1	34.706	8143.9	1	508.99
6	O94547	O94547	Serine/threonine-protein kinase srk1	srk1	sp|O94547|SRK1_SCHPO Serine/threonine-protein kinase srk1 OS=Schizosaccharomyces pombe (strain 972 / ATCC 24843) OX=284812 GN=srk1 PE=1 SV=1	66.135	14687	2	506.45
31.6	O74976	O74976	Putative peroxisomal-coenzyme A synthetase	SPCC1827.03c	sp|O74976|FAT2_SCHPO Oxalate--CoA ligase OS=Schizosaccharomyces pombe (strain 972 / ATCC 24843) OX=284812 GN=pcs60 PE=1 SV=1	56.274	13111	2	504.28
2.9	Q9P7K9	Q9P7K9	Putative aldehyde dehydrogenase-like protein C21C3	SPBC21C3.15c	sp|Q9P7K9|YOSF_SCHPO Putative aldehyde dehydrogenase-like protein C21C3 OS=Schizosaccharomyces pombe (strain 972 / ATCC 24843) OX=284812 GN=SPBC21C3.15c PE=3 SV=1	57.571	11982	1	499.26
9.8	O42893	O42893	Neutral trehalase	ntp1	sp|O42893|TREA_SCHPO Cytosolic neutral trehalase OS=Schizosaccharomyces pombe (strain 972 / ATCC 24843) OX=284812 GN=ntp1 PE=1 SV=1	84.602	21862	2	496.86
18.9	P24782	P24782	ATP-dependent RNA helicase dbp2	dbp2	sp|P24782|DBP2_SCHPO ATP-dependent RNA helicase dbp2 OS=Schizosaccharomyces pombe (strain 972 / ATCC 24843) OX=284812 GN=dbp2 PE=2 SV=2	61.547	14728	3	490.94
2.7	O14260	O14260	UPF0592 membrane protein C7D4.03c	SPAC7D4.03c	sp|O14260|YFP3_SCHPO UPF0592 membrane protein C7D4.03c OS=Schizosaccharomyces pombe (strain 972 / ATCC 24843) OX=284812 GN=SPAC7D4.03c PE=3 SV=1	101.02	20963	2	487.52
27.4	O60073	O60073	Synaptobrevin homolog ykt6	ykt6	sp|O60073|YKT6_SCHPO Synaptobrevin homolog ykt6 OS=Schizosaccharomyces pombe (strain 972 / ATCC 24843) OX=284812 GN=ykt6 PE=3 SV=1	22.651	6773.2	1	483.8
6.4	Q9UT00	Q9UT00	Uncharacterized protein PYUK71.03c	SPAPYUK71.03c	sp|Q9UT00|YKH3_SCHPO Uncharacterized protein PYUK71.03c OS=Schizosaccharomyces pombe (strain 972 / ATCC 24843) OX=284812 GN=SPAPYUK71.03c PE=1 SV=1	135.78	25532	2	481.74
15.8	P87153	P87153	Probable T-complex protein 1 subunit eta	cct7	sp|P87153|TCPH_SCHPO Probable T-complex protein 1 subunit eta OS=Schizosaccharomyces pombe (strain 972 / ATCC 24843) OX=284812 GN=cct7 PE=1 SV=1	60.686	17788	1	480.75
1.4	O14089	O14089	Importin subunit beta-2	kap104	sp|O14089|IMB2_SCHPO Importin subunit beta-2 OS=Schizosaccharomyces pombe (strain 972 / ATCC 24843) OX=284812 GN=kap104 PE=3 SV=1	101.72	14802	1	477.49
7.3	O42915	O42915	Ubiquitin fusion degradation protein 1	ufd1	sp|O42915|UFD1_SCHPO Ubiquitin fusion degradation protein 1 OS=Schizosaccharomyces pombe (strain 972 / ATCC 24843) OX=284812 GN=ufd1 PE=2 SV=4	38.226	11720	2	468.82
11.2	Q9URY5	Q9URY5	Flavohemoprotein	SPAC869.02c	sp|Q9URY5|FHP_SCHPO Flavohemoprotein OS=Schizosaccharomyces pombe (strain 972 / ATCC 24843) OX=284812 GN=SPAC869.02c PE=3 SV=1	48.459	13096	2	467.7
7	O94346	O94346	Arginine biosynthesis bifunctional protein ArgJ, mitochondrial;Glutamate N-acetyltransferase;Amino-acid acetyltransferase;Arginine biosynthesis bifunctional protein ArgJ alpha chain;Arginine biosynthesis bifunctional protein ArgJ beta chain	SPBC1271.14	sp|O94346|ARGJ_SCHPO Arginine biosynthesis bifunctional protein ArgJ, mitochondrial OS=Schizosaccharomyces pombe (strain 972 / ATCC 24843) OX=284812 GN=SPBC1271.14 PE=3 SV=1	47.287	8854.7	1	466.04
11.5	O60084	O60084	Mitochondrial import inner membrane translocase subunit tim44	tim44	sp|O60084|TIM44_SCHPO Mitochondrial import inner membrane translocase subunit tim44 OS=Schizosaccharomyces pombe (strain 972 / ATCC 24843) OX=284812 GN=tim44 PE=3 SV=1	48.549	12052	1	463.53
3.5	O74184	O74184	WD repeat-containing protein wat1	wat1	sp|O74184|WAT1_SCHPO Target of rapamycin complex subunit wat1 OS=Schizosaccharomyces pombe (strain 972 / ATCC 24843) OX=284812 GN=pop3 PE=1 SV=1	35.132	6614.3	1	440.95
4.2	Q09780	Q09780	Putative mevalonate kinase	erg12	sp|Q09780|KIME_SCHPO Putative mevalonate kinase OS=Schizosaccharomyces pombe (strain 972 / ATCC 24843) OX=284812 GN=erg12 PE=2 SV=1	43.406	5203.7	1	433.64
3.2	Q09172	Q09172	Protein phosphatase 2C homolog 2	ptc2	sp|Q09172|PP2C2_SCHPO Protein phosphatase 2C homolog 2 OS=Schizosaccharomyces pombe (strain 972 / ATCC 24843) OX=284812 GN=ptc2 PE=3 SV=1	40.878	8191.5	1	431.13
7.4	O13685	O13685	Ubiquitin-conjugating enzyme E2 13	ubc13	sp|O13685|UBC13_SCHPO Ubiquitin-conjugating enzyme E2 13 OS=Schizosaccharomyces pombe (strain 972 / ATCC 24843) OX=284812 GN=ubc13 PE=1 SV=1	16.855	3797.5	1	421.95
15	O94389	O94389	Coiled-coil domain-containing protein 124 homolog	SPBC29A10.12	sp|O94389|CC124_SCHPO Coiled-coil domain-containing protein 124 homolog OS=Schizosaccharomyces pombe (strain 972 / ATCC 24843) OX=284812 GN=SPBC29A10.12 PE=3 SV=1	24.069	3373.4	1	421.68
12.7	Q10161	Q10161	Probable clathrin heavy chain	chc1	sp|Q10161|CLH_SCHPO Probable clathrin heavy chain OS=Schizosaccharomyces pombe (strain 972 / ATCC 24843) OX=284812 GN=chc1 PE=1 SV=1	190.02	31032	2	408.32
64.1	P87158;Q9P4W9	P87158;Q9P4W9	40S ribosomal protein S4-A;40S ribosomal protein S4-C	rps4a;rps4c	sp|P87158|RS4A_SCHPO 40S ribosomal protein S4-A OS=Schizosaccharomyces pombe (strain 972 / ATCC 24843) OX=284812 GN=rps401 PE=2 SV=2;sp|Q9P4W9|RS4C_SCHPO 40S ribosomal protein S4-C OS=Schizosaccharomyces pombe (strain 972 / ATCC 24843) OX=284812 GN=rps403	29.688	6076.5	13	405.1
5.9	Q9USM1	Q9USM1	Probable proteasomal ubiquitin receptor ADRM1 homolog	SPCC16A11.16c	sp|Q9USM1|RP13B_SCHPO Proteasomal ubiquitin receptor ADRM1 homolog rpn1302 OS=Schizosaccharomyces pombe (strain 972 / ATCC 24843) OX=284812 GN=rpn1302 PE=1 SV=1	43.902	6856.7	1	403.34
1.9	P78963	P78963	Protein arginine N-methyltransferase skb1	skb1	sp|P78963|SKB1_SCHPO Protein arginine N-methyltransferase skb1 OS=Schizosaccharomyces pombe (strain 972 / ATCC 24843) OX=284812 GN=skb1 PE=1 SV=2	73.166	14465	1	401.79
9.3	Q9P6I7	Q9P6I7	Adenine deaminase	aah1	sp|Q9P6I7|ADE_SCHPO Adenine deaminase OS=Schizosaccharomyces pombe (strain 972 / ATCC 24843) OX=284812 GN=aah1 PE=1 SV=1	41.198	5928.6	1	395.24
21	O94616	O94616	DNA-directed RNA polymerases I and III subunit RPAC1	rpc40	sp|O94616|RPAC1_SCHPO DNA-directed RNA polymerases I and III subunit RPAC1 OS=Schizosaccharomyces pombe (strain 972 / ATCC 24843) OX=284812 GN=rpc40 PE=1 SV=1	39.154	6699	1	394.06
5.7	P22987	P22987	Protein kinase kin1	kin1	sp|P22987|KIN1_SCHPO Protein kinase kin1 OS=Schizosaccharomyces pombe (strain 972 / ATCC 24843) OX=284812 GN=kin1 PE=1 SV=3	98.748	17587	2	390.82
23.1	O14363	O14363	60S ribosomal protein L1-A	rpl1a	sp|O14363|RL1A_SCHPO 60S ribosomal protein L1-A OS=Schizosaccharomyces pombe (strain 972 / ATCC 24843) OX=284812 GN=rpl102 PE=1 SV=1	23.884	3486.4	3	387.38
7.1	Q9UTH2	Q9UTH2	Probable electron transfer flavoprotein subunit beta	SPAC1805.02c	sp|Q9UTH2|ETFB_SCHPO Probable electron transfer flavoprotein subunit beta OS=Schizosaccharomyces pombe (strain 972 / ATCC 24843) OX=284812 GN=SPAC1805.02c PE=3 SV=1	27.743	4613.6	1	384.46
9.7	O14131	O14131	Meiotically up-regulated gene 191 protein	mug191	sp|O14131|MU191_SCHPO Meiotically up-regulated gene 191 protein OS=Schizosaccharomyces pombe (strain 972 / ATCC 24843) OX=284812 GN=mug191 PE=1 SV=1	49.78	7914.1	1	376.86
7.3	O43028	O43028	Vacuolar protein 8	vac8	sp|O43028|VAC8_SCHPO Vacuolar protein 8 OS=Schizosaccharomyces pombe (strain 972 / ATCC 24843) OX=284812 GN=vac8 PE=1 SV=4	60.232	10423	1	372.26
4.6	Q10268	Q10268	Membrane-anchored protein 1	mac1	sp|Q10268|MAC1_SCHPO Membrane-anchored protein 1 OS=Schizosaccharomyces pombe (strain 972 / ATCC 24843) OX=284812 GN=mac1 PE=1 SV=1	81.715	11912	1	372.24
8.7	O74382	O74382	Probable phosphoserine phosphatase	SPBC3H7.07c	sp|O74382|SERB_SCHPO Probable phosphoserine phosphatase OS=Schizosaccharomyces pombe (strain 972 / ATCC 24843) OX=284812 GN=SPBC3H7.07c PE=2 SV=1	32.411	6279	1	369.35
13.5	O14209	O14209	Uncharacterized aminotransferase C6B12.04c	SPAC6B12.04c	sp|O14209|YDT4_SCHPO Uncharacterized aminotransferase C6B12.04c OS=Schizosaccharomyces pombe (strain 972 / ATCC 24843) OX=284812 GN=SPAC6B12.04c PE=3 SV=1	47.569	7739.8	1	368.56
11.1	Q9UUF7	Q9UUF7	Coatomer subunit beta	sec26	sp|Q9UUF7|COPB_SCHPO Coatomer subunit beta OS=Schizosaccharomyces pombe (strain 972 / ATCC 24843) OX=284812 GN=sec26 PE=3 SV=1	104.7	15838	1	368.32
5.2	O13656	O13656	Probable mitochondrial import receptor subunit tom40	tom40	sp|O13656|TOM40_SCHPO Probable mitochondrial import receptor subunit tom40 OS=Schizosaccharomyces pombe (strain 972 / ATCC 24843) OX=284812 GN=tom40 PE=3 SV=3	37.552	6249	1	367.59
3.6	Q10282	Q10282	Guanine nucleotide-binding protein subunit beta	git5	sp|Q10282|GBB_SCHPO Guanine nucleotide-binding protein subunit beta OS=Schizosaccharomyces pombe (strain 972 / ATCC 24843) OX=284812 GN=git5 PE=3 SV=2	32.828	3983.4	1	362.12
11.4	O43010	O43010	Glycylpeptide N-tetradecanoyltransferase	nmt1	sp|O43010|NMT_SCHPO Glycylpeptide N-tetradecanoyltransferase OS=Schizosaccharomyces pombe (strain 972 / ATCC 24843) OX=284812 GN=nmt1 PE=1 SV=1	53.696	8984.8	2	359.39
26.2	O14007	O14007	H/ACA ribonucleoprotein complex subunit 4	cbf5	sp|O14007|CBF5_SCHPO H/ACA ribonucleoprotein complex subunit cbf5 OS=Schizosaccharomyces pombe (strain 972 / ATCC 24843) OX=284812 GN=cbf5 PE=3 SV=1	53.11	10035	1	358.41
14.2	Q09171	Q09171	Pyruvate dehydrogenase E1 component subunit beta, mitochondrial	pdb1	sp|Q09171|ODPB_SCHPO Pyruvate dehydrogenase E1 component subunit beta, mitochondrial OS=Schizosaccharomyces pombe (strain 972 / ATCC 24843) OX=284812 GN=pdb1 PE=4 SV=1	39.623	5703.4	1	356.46
19.3	O94511	O94511	Putative enoyl reductase C646.07c	SPBC646.07c	sp|O94511|YN67_SCHPO Putative enoyl reductase C646.07c OS=Schizosaccharomyces pombe (strain 972 / ATCC 24843) OX=284812 GN=SPBC646.07c PE=3 SV=1	34.64	5649.7	1	353.1
5.2	O13752	O13752	Uncharacterized TLC domain-containing protein C17A2.02c	SPAC17A2.02c	sp|O13752|YF22_SCHPO Uncharacterized TLC domain-containing protein C17A2.02c OS=Schizosaccharomyces pombe (strain 972 / ATCC 24843) OX=284812 GN=SPAC17A2.02c PE=4 SV=1	33.042	3864.3	1	351.3
2.9	P27584	P27584	Guanine nucleotide-binding protein alpha-1 subunit	gpa1	sp|P27584|GPA1_SCHPO Guanine nucleotide-binding protein alpha-1 subunit OS=Schizosaccharomyces pombe (strain 972 / ATCC 24843) OX=284812 GN=gpa1 PE=3 SV=4	46.262	6317.9	1	351
1.2	O59683	O59683	Translation initiation factor IF-2, mitochondrial		sp|O59683|IF2M_SCHPO Translation initiation factor IF-2, mitochondrial OS=Schizosaccharomyces pombe (strain 972 / ATCC 24843) OX=284812 GN=SPBC1271.15c PE=3 SV=1	75.61	14529	1	345.92
18.8	O42888	O42888	Uncharacterized oxidoreductase C8E4.04	SPBC8E4.04	sp|O42888|YBN4_SCHPO Uncharacterized oxidoreductase C8E4.04 OS=Schizosaccharomyces pombe (strain 972 / ATCC 24843) OX=284812 GN=SPBC8E4.04 PE=3 SV=1	36.628	6559.7	1	345.25
9.6	O14349	O14349	IMP-specific 5-nucleotidase 1	isn1	sp|O14349|ISN1_SCHPO IMP-specific 5-nucleotidase 1 OS=Schizosaccharomyces pombe (strain 972 / ATCC 24843) OX=284812 GN=isn1 PE=3 SV=1	45.805	6528.5	2	343.6
3.9	P40232	P40232	Casein kinase II subunit beta	ckb1	sp|P40232|CSK2B_SCHPO Casein kinase II subunit beta OS=Schizosaccharomyces pombe (strain 972 / ATCC 24843) OX=284812 GN=ckb1 PE=2 SV=2	26.677	3427.3	1	342.73
3.4	O94625	O94625	DnaJ-related protein spj1	spj1	sp|O94625|SPJ1_SCHPO DnaJ-related protein spj1 OS=Schizosaccharomyces pombe (strain 972 / ATCC 24843) OX=284812 GN=spj1 PE=2 SV=2	42.383	6835.9	1	341.79
7.4	P87150	P87150	MICOS complex subunit mic19	mic19	sp|P87150|MIC19_SCHPO MICOS complex subunit mic19 OS=Schizosaccharomyces pombe (strain 972 / ATCC 24843) OX=284812 GN=mic19 PE=3 SV=1	18.767	3391.1	1	339.11
4.4	Q9UT34	Q9UT34	Uncharacterized protein C824.09c	SPAC824.09c	sp|Q9UT34|YIQ9_SCHPO Uncharacterized protein C824.09c OS=Schizosaccharomyces pombe (strain 972 / ATCC 24843) OX=284812 GN=SPAC824.09c PE=4 SV=1	35.109	5360.2	1	335.01
8	O74975	O74975	Probable choline-phosphate cytidylyltransferase	SPCC1827.02c	sp|O74975|PCY1_SCHPO Probable choline-phosphate cytidylyltransferase OS=Schizosaccharomyces pombe (strain 972 / ATCC 24843) OX=284812 GN=SPCC1827.02c PE=1 SV=3	41.75	5942.4	2	330.14
19.7	Q10235	Q10235	Cell polarity protein alp11	alp11	sp|Q10235|ALP11_SCHPO Cell polarity protein alp11 OS=Schizosaccharomyces pombe (strain 972 / ATCC 24843) OX=284812 GN=alp11 PE=1 SV=1	26.672	4537.3	1	324.09
12.8	O94320	O94320	Aspartate aminotransferase, mitochondrial	SPBC725.01	sp|O94320|AATM_SCHPO Aspartate aminotransferase, mitochondrial OS=Schizosaccharomyces pombe (strain 972 / ATCC 24843) OX=284812 GN=SPBC725.01 PE=3 SV=1	48.243	7683.9	1	320.16
4.8	O74351	O74351	Probable cysteine desulfurase, mitochondrial	SPBC21D10.11c	sp|O74351|NFS1_SCHPO Probable cysteine desulfurase, mitochondrial OS=Schizosaccharomyces pombe (strain 972 / ATCC 24843) OX=284812 GN=SPBC21D10.11c PE=3 SV=2	55.543	8642.9	1	320.11
1	Q10199	Q10199	Septation protein imp2	imp2	sp|Q10199|IMP2_SCHPO Septation protein imp2 OS=Schizosaccharomyces pombe (strain 972 / ATCC 24843) OX=284812 GN=imp2 PE=1 SV=1	75.166	11586	1	313.14
22.7	O94501	O94501	T-complex protein 1 subunit alpha	cct1	sp|O94501|TCPA_SCHPO T-complex protein 1 subunit alpha OS=Schizosaccharomyces pombe (strain 972 / ATCC 24843) OX=284812 GN=cct1 PE=3 SV=1	60.046	9400.5	1	303.24
6.1	Q09769	Q09769	Lon protease homolog, mitochondrial	pim1	sp|Q09769|LONM_SCHPO Lon protease homolog, mitochondrial OS=Schizosaccharomyces pombe (strain 972 / ATCC 24843) OX=284812 GN=pim1 PE=3 SV=1	118.64	17184	2	301.48
6.5	O74653	O74653	Protein pob1	pob1	sp|O74653|POB1_SCHPO Protein pob1 OS=Schizosaccharomyces pombe (strain 972 / ATCC 24843) OX=284812 GN=pob1 PE=1 SV=1	93.772	13517	2	300.37
12.6	Q9UU91	Q9UU91	Protein yop1	yop1	sp|Q9UU91|YOP1_SCHPO Protein yop1 OS=Schizosaccharomyces pombe (strain 972 / ATCC 24843) OX=284812 GN=yop1 PE=1 SV=1	20.782	1779.1	1	296.51
9.7	O14362	O14362	Cell wall biosynthesis/cell cycle regulator smi1	smi1	sp|O14362|SMI1_SCHPO Cell wall biosynthesis/cell cycle regulator smi1 OS=Schizosaccharomyces pombe (strain 972 / ATCC 24843) OX=284812 GN=smi1 PE=1 SV=1	55.557	4336	1	289.07
25.6	O94514	O94514	Nucleolar protein 56	nop56	sp|O94514|NOP56_SCHPO Nucleolar protein 56 OS=Schizosaccharomyces pombe (strain 972 / ATCC 24843) OX=284812 GN=nop56 PE=3 SV=1	55.388	7737	1	286.55
7	P41820	P41820	Brefeldin A resistance protein	bfr1	sp|P41820|BFR1_SCHPO Brefeldin A resistance protein OS=Schizosaccharomyces pombe (strain 972 / ATCC 24843) OX=284812 GN=bfr1 PE=1 SV=1	171.75	19698	2	285.48
6.4	O74417	O74417	Uncharacterized protein C14G10.04	SPCC14G10.04	sp|O74417|YJL4_SCHPO Uncharacterized protein C14G10.04 OS=Schizosaccharomyces pombe (strain 972 / ATCC 24843) OX=284812 GN=SPCC14G10.04 PE=1 SV=1	52.624	7069.2	1	282.77
8.1	O94267	O94267	FACT complex subunit spt16	spt16	sp|O94267|SPT16_SCHPO FACT complex subunit spt16 OS=Schizosaccharomyces pombe (strain 972 / ATCC 24843) OX=284812 GN=spt16 PE=1 SV=1	116.45	14631	1	281.36
12.8	O74985	O74985	N-terminal acetyltransferase A complex subunit nat1	nat1	sp|O74985|NAT1_SCHPO N-terminal acetyltransferase A complex subunit nat1 OS=Schizosaccharomyces pombe (strain 972 / ATCC 24843) OX=284812 GN=nat1 PE=1 SV=1	83.677	10887	1	279.16
3	Q9P780	Q9P780	Nuclear protein localization protein 4	npl4	sp|Q9P780|NPL4_SCHPO Nuclear protein localization protein 4 OS=Schizosaccharomyces pombe (strain 972 / ATCC 24843) OX=284812 GN=npl4 PE=3 SV=2	63.618	6663.5	1	277.65
7.4	Q9UU99	Q9UU99	CRAL-TRIO domain-containing protein C23B6.04c	SPCC23B6.04c	sp|Q9UU99|YJX4_SCHPO CRAL-TRIO domain-containing protein C23B6.04c OS=Schizosaccharomyces pombe (strain 972 / ATCC 24843) OX=284812 GN=SPCC23B6.04c PE=1 SV=1	110.72	17996	3	272.67
9.2	O74314	O74314	Probable cystathionine gamma-synthase	SPBC15D4.09c	sp|O74314|MET7_SCHPO Probable cystathionine gamma-synthase OS=Schizosaccharomyces pombe (strain 972 / ATCC 24843) OX=284812 GN=SPBC15D4.09c PE=3 SV=1	68.967	7350.2	1	272.23
5.4	O60059	O60059	Pumilio domain-containing protein C56F2.08c	SPBC56F2.08c	sp|O60059|YG58_SCHPO Pumilio domain-containing protein C56F2.08c OS=Schizosaccharomyces pombe (strain 972 / ATCC 24843) OX=284812 GN=SPBC56F2.08c PE=1 SV=1	72.822	8860.9	1	268.51
9.2	O74436	O74436	Signal recognition particle subunit srp68	srp68	sp|O74436|SRP68_SCHPO Signal recognition particle subunit srp68 OS=Schizosaccharomyces pombe (strain 972 / ATCC 24843) OX=284812 GN=srp68 PE=3 SV=1	67.859	9395.8	1	268.45
5.4	Q09744	Q09744	Uncharacterized FAD-binding protein C12C2.03c	SPBC12C2.03c	sp|Q09744|YB63_SCHPO Uncharacterized FAD-binding protein C12C2.03c OS=Schizosaccharomyces pombe (strain 972 / ATCC 24843) OX=284812 GN=SPBC12C2.03c PE=3 SV=1	63.976	8040.7	1	268.02
8.4	P56287	P56287	Probable translation initiation factor eIF-2B subunit epsilon	tif225	sp|P56287|EI2BE_SCHPO Probable translation initiation factor eIF-2B subunit epsilon OS=Schizosaccharomyces pombe (strain 972 / ATCC 24843) OX=284812 GN=tif225 PE=1 SV=1	76.325	8550.1	1	267.19
12.2	O43032	O43032	Signal recognition particle receptor subunit alpha homolog	srp101	sp|O43032|SRPR_SCHPO Signal recognition particle receptor subunit alpha homolog OS=Schizosaccharomyces pombe (strain 972 / ATCC 24843) OX=284812 GN=srp101 PE=3 SV=1	61.077	8537.6	1	258.72
1.1	O13956	O13956	Ribosome biogenesis protein tsr1 homolog	SPAC23H4.15	sp|O13956|TSR1_SCHPO Ribosome biogenesis protein tsr1 OS=Schizosaccharomyces pombe (strain 972 / ATCC 24843) OX=284812 GN=tsr1 PE=3 SV=1	90.125	9567.2	1	258.57
15.8	O74432	O74432	Golgi to ER traffic protein 4	get4	sp|O74432|GET4_SCHPO Golgi to ER traffic protein 4 OS=Schizosaccharomyces pombe (strain 972 / ATCC 24843) OX=284812 GN=get4 PE=3 SV=1	34.352	4346.4	1	255.67
2.3	Q09868	Q09868	RNA-binding post-transcriptional regulator cip2	cip2	sp|Q09868|CIP2_SCHPO RNA-binding post-transcriptional regulator cip2 OS=Schizosaccharomyces pombe (strain 972 / ATCC 24843) OX=284812 GN=cip2 PE=1 SV=1	62.068	4588.2	1	254.9
18.3	O94692	O94692	RuvB-like helicase 2	rvb2	sp|O94692|RUVB2_SCHPO RuvB-like helicase 2 OS=Schizosaccharomyces pombe (strain 972 / ATCC 24843) OX=284812 GN=rvb2 PE=1 SV=1	51.561	6571.7	1	252.76
14.9	Q9HGP5	Q9HGP5	F-actin-capping protein subunit beta	acp2	sp|Q9HGP5|CAPZB_SCHPO F-actin-capping protein subunit beta OS=Schizosaccharomyces pombe (strain 972 / ATCC 24843) OX=284812 GN=acp2 PE=1 SV=1	29.845	3760.2	1	250.68
7.5	O42903	O42903	GRIP domain-containing protein C119.12	SPBC119.12	sp|O42903|YBAC_SCHPO GRIP domain-containing protein C119.12 OS=Schizosaccharomyces pombe (strain 972 / ATCC 24843) OX=284812 GN=SPBC119.12 PE=2 SV=1	46.153	6171.9	1	246.88
4.2	O14057	O14057	Probable guanine deaminase	SPCC1672.03c	sp|O14057|GUAD_SCHPO Probable guanine deaminase OS=Schizosaccharomyces pombe (strain 972 / ATCC 24843) OX=284812 GN=SPCC1672.03c PE=3 SV=1	58.046	6400.4	1	246.17
19.7	Q9UUB4	Q9UUB4	Phosphoribosylaminoimidazole-succinocarboxamide synthase	ade7	sp|Q9UUB4|PUR7_SCHPO Phosphoribosylaminoimidazole-succinocarboxamide synthase OS=Schizosaccharomyces pombe (strain 972 / ATCC 24843) OX=284812 GN=ade7 PE=3 SV=1	33.913	5126.3	1	244.11
5.3	Q09833	Q09833	tRNA (uracil(54)-C(5))-methyltransferase	SPAC4G8.07c	sp|Q09833|YAD7_SCHPO tRNA (uracil(54)-C(5))-methyltransferase OS=Schizosaccharomyces pombe (strain 972 / ATCC 24843) OX=284812 GN=SPAC4G8.07c PE=3 SV=1	59.613	7744.1	1	242
4.4	Q10482	Q10482	Seven transmembrane protein 1	stm1	sp|Q10482|STM1_SCHPO Seven transmembrane protein 1 OS=Schizosaccharomyces pombe (strain 972 / ATCC 24843) OX=284812 GN=stm1 PE=1 SV=1	30.614	1208.5	1	241.7
2.5	O74505	O74505	Uncharacterized protein C594.02c	SPCC594.02c	sp|O74505|YJD2_SCHPO Uncharacterized protein C594.02c OS=Schizosaccharomyces pombe (strain 972 / ATCC 24843) OX=284812 GN=SPCC594.02c PE=1 SV=1	54.866	4539	1	238.89
14.4	O13755	O13755	Fumarate reductase	osm1	sp|O13755|OSM1_SCHPO Fumarate reductase OS=Schizosaccharomyces pombe (strain 972 / ATCC 24843) OX=284812 GN=osm1 PE=3 SV=1	55.483	6415.5	1	237.61
2.2	Q9HGL2	Q9HGL2	Uncharacterized calcium-binding protein C800.10c	SPBC800.10c	sp|Q9HGL2|YHLA_SCHPO Uncharacterized calcium-binding protein C800.10c OS=Schizosaccharomyces pombe (strain 972 / ATCC 24843) OX=284812 GN=SPBC800.10c PE=4 SV=1	120.54	10687	2	237.48
5.9	O14326	O14326	E3 ubiquitin-protein ligase pub3	pub3	sp|O14326|PUB3_SCHPO E3 ubiquitin-protein ligase pub3 OS=Schizosaccharomyces pombe (strain 972 / ATCC 24843) OX=284812 GN=pub3 PE=2 SV=1	89.259	10077	3	234.35
4.4	P78813	P78813	ENTH domain-containing protein C794.11c	SPCC794.11c	sp|P78813|YCTB_SCHPO ENTH domain-containing protein C794.11c OS=Schizosaccharomyces pombe (strain 972 / ATCC 24843) OX=284812 GN=SPCC794.11c PE=1 SV=2	51.751	3983.5	1	234.32
32.5	O00087	O00087	Dihydrolipoyl dehydrogenase, mitochondrial	dld1	sp|O00087|DLDH_SCHPO Dihydrolipoyl dehydrogenase, mitochondrial OS=Schizosaccharomyces pombe (strain 972 / ATCC 24843) OX=284812 GN=dld1 PE=2 SV=2	54.731	6997.5	2	233.25
1.5	O13779	O13779	Putative metal ion transporter C17A12.14		sp|O13779|YF2E_SCHPO Putative metal ion transporter C17A12.14 OS=Schizosaccharomyces pombe (strain 972 / ATCC 24843) OX=284812 GN=SPAC17A2.14 PE=1 SV=4	71.197	5337.7	1	232.07
9.7	Q9UTN1	Q9UTN1	Mitochondrial oxaloacetate transport protein	oac1	sp|Q9UTN1|OAC1_SCHPO Mitochondrial oxaloacetate transport protein OS=Schizosaccharomyces pombe (strain 972 / ATCC 24843) OX=284812 GN=oac1 PE=3 SV=1	35.547	4354.8	1	229.2
4.7	O59761	O59761	S-adenosyl-L-methionine-dependent tRNA 4-demethylwyosine synthase	tyw1	sp|O59761|TYW1_SCHPO S-adenosyl-L-methionine-dependent tRNA 4-demethylwyosine synthase OS=Schizosaccharomyces pombe (strain 972 / ATCC 24843) OX=284812 GN=tyw1 PE=3 SV=1	78.187	7602.9	1	223.61
15.8	Q9USU7	Q9USU7	HMG box-containing protein C28F2.11	SPBC28F2.11	sp|Q9USU7|YHHB_SCHPO HMG box-containing protein C28F2.11 OS=Schizosaccharomyces pombe (strain 972 / ATCC 24843) OX=284812 GN=SPBC28F2.11 PE=1 SV=1	33.891	4239	1	223.1
13.5	Q10104	Q10104	Serine hydroxymethyltransferase, mitochondrial	shm2	sp|Q10104|GLYM_SCHPO Serine hydroxymethyltransferase, mitochondrial OS=Schizosaccharomyces pombe (strain 972 / ATCC 24843) OX=284812 GN=shm2 PE=3 SV=2	53.978	5881.3	2	217.83
4.5	O59787	O59787	Signal recognition particle subunit srp72	srp72	sp|O59787|SRP72_SCHPO Signal recognition particle subunit srp72 OS=Schizosaccharomyces pombe (strain 972 / ATCC 24843) OX=284812 GN=srp72 PE=3 SV=1	63.28	7485.4	1	213.87
3.4	Q10357	Q10357	Superoxide dismutase 1 copper chaperone	ccs1	sp|Q10357|CCS1_SCHPO Superoxide dismutase 1 copper chaperone OS=Schizosaccharomyces pombe (strain 972 / ATCC 24843) OX=284812 GN=ccs1 PE=3 SV=1	32.243	5117.2	1	213.22
15	P55306	P55306	Catalase	cta1	sp|P55306|CATA_SCHPO Catalase OS=Schizosaccharomyces pombe (strain 972 / ATCC 24843) OX=284812 GN=cta1 PE=1 SV=1	58.279	5845.6	1	208.77
7	O74558	O74558	Maintenance of ploidy protein mob2	mob2	sp|O74558|MOB2_SCHPO Maintenance of ploidy protein mob2 OS=Schizosaccharomyces pombe (strain 972 / ATCC 24843) OX=284812 GN=mob2 PE=1 SV=1	28.109	2275.8	1	206.89
7.3	Q9UUI8	Q9UUI8	Uncharacterized transporter C22F8.04	SPAC22F8.04	sp|Q9UUI8|YIY4_SCHPO Uncharacterized transporter C22F8.04 OS=Schizosaccharomyces pombe (strain 972 / ATCC 24843) OX=284812 GN=SPAC22F8.04 PE=3 SV=1	42.626	4102.8	1	205.14
21.1	Q9Y7U7	Q9Y7U7	Staphylococcal nuclease domain-containing protein 1	snd1	sp|Q9Y7U7|SND1_SCHPO Staphylococcal nuclease domain-containing protein 1 OS=Schizosaccharomyces pombe (strain 972 / ATCC 24843) OX=284812 GN=snd1 PE=1 SV=1	98.16	8171.3	1	204.28
5.3	Q9P7S1	Q9P7S1	PDZ domain-containing protein C23G3.12c	SPAC23G3.12c	sp|Q9P7S1|YIFC_SCHPO PDZ domain-containing protein C23G3.12c OS=Schizosaccharomyces pombe (strain 972 / ATCC 24843) OX=284812 GN=SPAC23G3.12c PE=2 SV=1	110.41	11022	1	200.39
1.4	O43048	O43048	TBC domain-containing protein C215.01		sp|O43048|YH51_SCHPO TBC domain-containing protein C215.01 OS=Schizosaccharomyces pombe (strain 972 / ATCC 24843) OX=284812 GN=SPBC215.01 PE=3 SV=4	95.005	8525.6	1	198.27
8.2	Q9USH9	Q9USH9	Uncharacterized ABC transporter ATP-binding protein C825.01	SPCC825.01	sp|Q9USH9|YJQ1_SCHPO Uncharacterized ABC transporter ATP-binding protein C825.01 OS=Schizosaccharomyces pombe (strain 972 / ATCC 24843) OX=284812 GN=SPCC825.01 PE=1 SV=1	92.689	6892.2	1	196.92
7.2	O14340	O14340	Oxysterol-binding protein homolog C2F12.05c	SPBC2F12.05c	sp|O14340|YB35_SCHPO Oxysterol-binding protein homolog C2F12.05c OS=Schizosaccharomyces pombe (strain 972 / ATCC 24843) OX=284812 GN=SPBC2F12.05c PE=1 SV=2	148.47	15650	1	195.62
1.5	Q9HE05	Q9HE05	Ubiquitin conjugation factor E4	ufd2	sp|Q9HE05|UFD2_SCHPO Ubiquitin conjugation factor E4 OS=Schizosaccharomyces pombe (strain 972 / ATCC 24843) OX=284812 GN=ufd2 PE=2 SV=1	115.28	10013	1	188.92
5.5	P87239	P87239	DnaJ homolog 1, mitochondrial	mdj1	sp|P87239|MDJ1_SCHPO DnaJ homolog 1, mitochondrial OS=Schizosaccharomyces pombe (strain 972 / ATCC 24843) OX=284812 GN=mdj1 PE=3 SV=1	57.188	5092.6	1	188.61
2.3	Q9C1W6	Q9C1W6	Uncharacterized protein C713.09	SPBC713.09	sp|Q9C1W6|YN59_SCHPO Uncharacterized protein C713.09 OS=Schizosaccharomyces pombe (strain 972 / ATCC 24843) OX=284812 GN=SPBC713.09 PE=4 SV=1	44.77	3201.1	1	188.3
7.1	Q9HGP1	Q9HGP1	Uncharacterized protein C29B5.04c	SPBC29B5.04c	sp|Q9HGP1|YNK4_SCHPO Uncharacterized protein C29B5.04c OS=Schizosaccharomyces pombe (strain 972 / ATCC 24843) OX=284812 GN=SPBC29B5.04c PE=4 SV=1	68.508	6546.8	2	181.86
15.2	Q9P7S2	Q9P7S2	Probable 26S proteasome regulatory subunit rpn6	rpn6	sp|Q9P7S2|RPN6_SCHPO Probable 26S proteasome regulatory subunit rpn6 OS=Schizosaccharomyces pombe (strain 972 / ATCC 24843) OX=284812 GN=rpn6 PE=3 SV=1	47.341	3607	1	180.35
9.1	P32235	P32235	GTP-binding protein 1	gtp1	sp|P32235|GTP1_SCHPO GTP-binding protein 1 OS=Schizosaccharomyces pombe (strain 972 / ATCC 24843) OX=284812 GN=gtp1 PE=3 SV=2	40.848	4406.2	1	176.25
6.7	O59779	O59779	Uncharacterized protein C1235.01		sp|O59779|YCY1_SCHPO Uncharacterized protein C1235.01 OS=Schizosaccharomyces pombe (strain 972 / ATCC 24843) OX=284812 GN=SPCC1235.01 PE=4 SV=1	69.695	1053.1	1	175.52
1.9	O43027	O43027	Probable Rho-GTPase-activating protein 6	rga6	sp|O43027|RGA6_SCHPO Probable Rho-GTPase-activating protein 6 OS=Schizosaccharomyces pombe (strain 972 / ATCC 24843) OX=284812 GN=rga6 PE=1 SV=1	80.776	6633	1	174.55
3.2	Q09766	Q09766	Uncharacterized membrane protein C24H6.13	SPAC24H6.13	sp|Q09766|YA7D_SCHPO Uncharacterized membrane protein C24H6.13 OS=Schizosaccharomyces pombe (strain 972 / ATCC 24843) OX=284812 GN=SPAC24H6.13 PE=1 SV=1	98.441	5551.9	1	173.5
10.6	O43024	O43024	CUE domain-containing protein C354.10	SPBC354.10	sp|O43024|YGVA_SCHPO CUE domain-containing protein C354.10 OS=Schizosaccharomyces pombe (strain 972 / ATCC 24843) OX=284812 GN=SPBC354.10 PE=1 SV=1	100.13	5111.9	1	170.4
2.7	Q9Y7U0	Q9Y7U0	Uncharacterized protein C63.14	SPCC63.14	sp|Q9Y7U0|YCJE_SCHPO Uncharacterized protein C63.14 OS=Schizosaccharomyces pombe (strain 972 / ATCC 24843) OX=284812 GN=SPCC63.14 PE=1 SV=1	131.06	10677	1	166.83
2.4	Q9Y7P6	Q9Y7P6	Meiotically up-regulated gene 72 protein	mug72	sp|Q9Y7P6|MUG72_SCHPO Meiotically up-regulated gene 72 protein OS=Schizosaccharomyces pombe (strain 972 / ATCC 24843) OX=284812 GN=mug72 PE=1 SV=1	62.846	4404.9	1	163.15
2.3	Q9UT57	Q9UT57	Probable cytosolic Fe-S cluster assembly factor SPAC806.02c	SPAC806.02c	sp|Q9UT57|CFD1_SCHPO Probable cytosolic Fe-S cluster assembly factor SPAC806.02c OS=Schizosaccharomyces pombe (strain 972 / ATCC 24843) OX=284812 GN=SPAC806.02c PE=3 SV=1	67.68	3892.1	1	162.17
1.7	O94590	O94590	Protein transport protein sec1	sec1	sp|O94590|SEC1_SCHPO Protein transport protein sec1 OS=Schizosaccharomyces pombe (strain 972 / ATCC 24843) OX=284812 GN=sec1 PE=3 SV=1	79.637	6647.3	1	162.13
8.2	O14255	O14255	Probable mannosyl-oligosaccharide glucosidase	SPAC6G10.09	sp|O14255|GCS1_SCHPO Probable mannosyl-oligosaccharide glucosidase OS=Schizosaccharomyces pombe (strain 972 / ATCC 24843) OX=284812 GN=SPAC6G10.09 PE=3 SV=1	92.888	7126.6	1	154.93
16.3	O59810	O59810	Vigilin 1	vgl1	sp|O59810|VGL1_SCHPO Vigilin 1 OS=Schizosaccharomyces pombe (strain 972 / ATCC 24843) OX=284812 GN=vgl1 PE=1 SV=2	142.61	10435	2	149.07
12.8	O74524	O74524	Probable proline dehydrogenase, mitochondrial	SPCC70.03c	sp|O74524|PROD_SCHPO Probable proline dehydrogenase, mitochondrial OS=Schizosaccharomyces pombe (strain 972 / ATCC 24843) OX=284812 GN=SPCC70.03c PE=3 SV=1	55.812	4295.1	1	148.11
3	O74452	O74452	Cell wall integrity protein scw1	scw1	sp|O74452|SCW1_SCHPO Cell wall integrity protein scw1 OS=Schizosaccharomyces pombe (strain 972 / ATCC 24843) OX=284812 GN=scw1 PE=1 SV=1	60.393	3537.9	1	147.41
11.1	P41391	P41391	Ran GTPase-activating protein 1	rna1	sp|P41391|RNA1_SCHPO Ran GTPase-activating protein 1 OS=Schizosaccharomyces pombe (strain 972 / ATCC 24843) OX=284812 GN=rna1 PE=1 SV=1	43.235	3066.2	1	146.01
9.4	Q9URZ5	Q9URZ5	Vacuolar protein sorting-associated protein 1	vps1	sp|Q9URZ5|VPS1_SCHPO Vacuolar protein sorting-associated protein 1 OS=Schizosaccharomyces pombe (strain 972 / ATCC 24843) OX=284812 GN=vps1 PE=3 SV=2	75.79	5419.9	1	142.63
2.2	Q9UTI7	Q9UTI7	Probable thymidylate synthase	SPAC15E1.04	sp|Q9UTI7|TYSY_SCHPO Probable thymidylate synthase OS=Schizosaccharomyces pombe (strain 972 / ATCC 24843) OX=284812 GN=SPAC15E1.04 PE=3 SV=1	69.893	3665.5	1	140.98
1.6	Q9P6L9	Q9P6L9	Uncharacterized protein C688.07c	SPAC688.07c	sp|Q9P6L9|YKQ7_SCHPO Uncharacterized protein C688.07c OS=Schizosaccharomyces pombe (strain 972 / ATCC 24843) OX=284812 GN=SPAC688.07c PE=1 SV=1	113.94	7237.5	1	136.56
7	O42885;Q9P6J9	O42885	Putative inorganic phosphate transporter C8E4.01c		sp|O42885|YBN1_SCHPO Putative inorganic phosphate transporter C8E4.01c OS=Schizosaccharomyces pombe (strain 972 / ATCC 24843) OX=284812 GN=SPBC8E4.01c PE=1 SV=2	63.645	3409.8	1	136.39
2.6	Q10437	Q10437	UBP9-binding protein bun62	bun62	sp|Q10437|BUN62_SCHPO UBP9-binding protein bun62 OS=Schizosaccharomyces pombe (strain 972 / ATCC 24843) OX=284812 GN=bun62 PE=1 SV=1	61.81	4415.1	1	133.79
19.7	Q9US20	Q9US20	Uncharacterized acyltransferase C1851.02	SPAC1851.02	sp|Q9US20|YLD2_SCHPO Uncharacterized acyltransferase C1851.02 OS=Schizosaccharomyces pombe (strain 972 / ATCC 24843) OX=284812 GN=SPAC1851.02 PE=3 SV=1	31.393	1857.1	1	132.65
1.6	Q9USY7	Q9USY7	Transmembrane GTPase fzo1	fzo1	sp|Q9USY7|FZO1_SCHPO Transmembrane GTPase fzo1 OS=Schizosaccharomyces pombe (strain 972 / ATCC 24843) OX=284812 GN=fzo1 PE=3 SV=1	87.101	5421.7	1	132.24
2.3	Q9P6L5	Q9P6L5	Endocytosis protein end4	end4	sp|Q9P6L5|SLA2_SCHPO Endocytosis protein end4 OS=Schizosaccharomyces pombe (strain 972 / ATCC 24843) OX=284812 GN=end4 PE=1 SV=2	124.37	6760.9	1	130.02
19	O94315	O94315	Uncharacterized oxidoreductase C215.11c	SPBC215.11c	sp|O94315|YH5B_SCHPO Uncharacterized oxidoreductase C215.11c OS=Schizosaccharomyces pombe (strain 972 / ATCC 24843) OX=284812 GN=SPBC215.11c PE=3 SV=1	33.922	2726.9	1	129.85
6	Q09803	Q09803	Suppressor protein of bem1/bed5 double mutants	vps4	sp|Q09803|VPS4_SCHPO Suppressor protein of bem1/bed5 double mutants OS=Schizosaccharomyces pombe (strain 972 / ATCC 24843) OX=284812 GN=vps4 PE=3 SV=1	48.401	3479.9	1	128.89
17.1	Q9US35	Q9US35	D-serine dehydratase	SPAC1039.06	sp|Q9US35|DSD1_SCHPO D-serine dehydratase OS=Schizosaccharomyces pombe (strain 972 / ATCC 24843) OX=284812 GN=SPAC1039.06 PE=3 SV=1	45.647	3221.2	1	128.85
6.8	P50527	P50527	Serine/threonine-protein kinase shk1/pak1	shk1	sp|P50527|STE20_SCHPO Serine/threonine-protein kinase shk1/pak1 OS=Schizosaccharomyces pombe (strain 972 / ATCC 24843) OX=284812 GN=shk1 PE=1 SV=2	72.357	4713	1	120.85
1.3	O14232	O14232	ATP-dependent RNA helicase mtr4	mtr4	sp|O14232|MTR4_SCHPO ATP-dependent RNA helicase mtr4 OS=Schizosaccharomyces pombe (strain 972 / ATCC 24843) OX=284812 GN=mtr4 PE=1 SV=1	126.19	7333	1	118.27
4.5	Q9HGM3	Q9HGM3	Mitochondrial respiratory chain complexes assembly protein rca1	yta12	sp|Q9HGM3|YTA12_SCHPO Mitochondrial respiratory chain complexes assembly protein rca1 OS=Schizosaccharomyces pombe (strain 972 / ATCC 24843) OX=284812 GN=yta12 PE=3 SV=1	85.368	4106.4	1	108.06
7.3	Q9US47	Q9US47	Putative succinate-semialdehyde dehydrogenase C1002.12c [NADP(+)]	SPAC1002.12c	sp|Q9US47|SSDH1_SCHPO Putative succinate-semialdehyde dehydrogenase C1002.12c [NADP(+)] OS=Schizosaccharomyces pombe (strain 972 / ATCC 24843) OX=284812 GN=SPAC1002.12c PE=3 SV=2	58.833	3323.9	1	107.22
4	Q9UT61	Q9UT61	Alpha-mannosidase	ams1	sp|Q9UT61|MAN1_SCHPO Alpha-mannosidase OS=Schizosaccharomyces pombe (strain 972 / ATCC 24843) OX=284812 GN=ams1 PE=1 SV=1	122.44	5912.3	1	105.58
11	O60180	O60180	Probable metalloprotease arx1	arx1	sp|O60180|ARX1_SCHPO Probable metalloprotease arx1 OS=Schizosaccharomyces pombe (strain 972 / ATCC 24843) OX=284812 GN=arx1 PE=3 SV=1	45.672	2079.5	1	103.98
8.2	Q10251	Q10251	Eukaryotic translation initiation factor 5B	SPAC56F8.03	sp|Q10251|IF2P_SCHPO Eukaryotic translation initiation factor 5B OS=Schizosaccharomyces pombe (strain 972 / ATCC 24843) OX=284812 GN=SPAC56F8.03 PE=1 SV=1	119.93	4710.1	1	98.126
3.5	P36583	P36583	Protein kinase C-like 2	pck2	sp|P36583|PCK2_SCHPO Protein kinase C-like 2 OS=Schizosaccharomyces pombe (strain 972 / ATCC 24843) OX=284812 GN=pck2 PE=1 SV=2	116	5546	1	97.299
0.9	O14029	O14029	COPII coat assembly protein sec16	sec16	sp|O14029|SEC16_SCHPO COPII coat assembly protein sec16 OS=Schizosaccharomyces pombe (strain 972 / ATCC 24843) OX=284812 GN=sec16 PE=1 SV=2	218.09	7388.6	1	95.955
5	O94725	O94725	Protein-glutamate O-methyltransferase C1393.13	SPCC1393.13	sp|O94725|ART1B_SCHPO Damage-control phosphatase SPCC1393.13 OS=Schizosaccharomyces pombe (strain 972 / ATCC 24843) OX=284812 GN=SPCC1393.13 PE=3 SV=1	50.117	2221.6	1	92.568
3.1	O60079	O60079	Probable ubiquitin carboxyl-terminal hydrolase 12	ubp12	sp|O60079|UBP12_SCHPO Probable ubiquitin carboxyl-terminal hydrolase 12 OS=Schizosaccharomyces pombe (strain 972 / ATCC 24843) OX=284812 GN=ubp12 PE=1 SV=1	111.97	3823.9	1	78.04
12.3	O60158	O60158	Bouquet formation protein 4	bqt4	sp|O60158|BQT4_SCHPO Bouquet formation protein 4 OS=Schizosaccharomyces pombe (strain 972 / ATCC 24843) OX=284812 GN=bqt4 PE=1 SV=2	47.826	1866.5	1	71.79
11	O60100	O60100	Probable importin subunit beta-4	kap123	sp|O60100|IMB4_SCHPO Probable importin subunit beta-4 OS=Schizosaccharomyces pombe (strain 972 / ATCC 24843) OX=284812 GN=kap123 PE=3 SV=1	117.83	2798.1	1	51.816
3	Q9USG8	Q9USG8	Meiotically up-regulated gene 190 protein	mug190	sp|Q9USG8|MU190_SCHPO Meiotically up-regulated gene 190 protein OS=Schizosaccharomyces pombe (strain 972 / ATCC 24843) OX=284812 GN=mug190 PE=1 SV=1	133.68	1561.3	1	26.021
1.5	O42926	O42926	Vacuolar protein sorting-associated protein 13b	vps13b	sp|O42926|VP13B_SCHPO Vacuolar protein sorting-associated protein 13b OS=Schizosaccharomyces pombe (strain 972 / ATCC 24843) OX=284812 GN=vps13b PE=2 SV=1	354.02	1471.7	1	9.7462
20.4	G2TRP7	G2TRP7	Mitochondrial import receptor subunit tom5	tom5	sp|G2TRP7|TOM5_SCHPO Mitochondrial import receptor subunit tom5 OS=Schizosaccharomyces pombe (strain 972 / ATCC 24843) OX=284812 GN=tom5 PE=3 SV=1	5.3623	0	0	0
4.1	O00084	O00084	Urease	ure1	sp|O00084|UREA_SCHPO Urease OS=Schizosaccharomyces pombe (strain 972 / ATCC 24843) OX=284812 GN=ure1 PE=1 SV=1	91.181	0	0	0
2.6	O13310	O13310	Serine/threonine-protein kinase orb6	orb6	sp|O13310|ORB6_SCHPO Serine/threonine-protein kinase orb6 OS=Schizosaccharomyces pombe (strain 972 / ATCC 24843) OX=284812 GN=orb6 PE=1 SV=1	54.691	0	0	0
4.5	O13621	O13621	Uncharacterized protein C691.05c		sp|O13621|YNG5_SCHPO Uncharacterized protein C691.05c OS=Schizosaccharomyces pombe (strain 972 / ATCC 24843) OX=284812 GN=pi030 PE=4 SV=1	76.67	0	0	0
2.1	O13622	O13622	ATP-dependent RNA helicase mss116, mitochondrial	mss116	sp|O13622|MS116_SCHPO ATP-dependent RNA helicase mss116, mitochondrial OS=Schizosaccharomyces pombe (strain 972 / ATCC 24843) OX=284812 GN=mss116 PE=3 SV=1	59.449	0	0	0
3.2	O13642	O13642	Lipoyl synthase, mitochondrial	lip5	sp|O13642|LIPA_SCHPO Lipoyl synthase, mitochondrial OS=Schizosaccharomyces pombe (strain 972 / ATCC 24843) OX=284812 GN=lip5 PE=3 SV=2	41.69	0	0	0
4.6	O13666	O13666	C-5 sterol desaturase erg32	erg32	sp|O13666|ERG32_SCHPO Delta(7)-sterol 5(6)-desaturase erg32 OS=Schizosaccharomyces pombe (strain 972 / ATCC 24843) OX=284812 GN=erg32 PE=3 SV=1	39.063	0	0	0
2.7	O13692	O13692	1,3-beta-glucanosyltransferase gas5	gas5	sp|O13692|GAS5_SCHPO 1,3-beta-glucanosyltransferase gas5 OS=Schizosaccharomyces pombe (strain 972 / ATCC 24843) OX=284812 GN=gas5 PE=1 SV=1	53.692	0	0	0
14.4	O13724	O13724	Zinc finger protein zpr1	zpr1	sp|O13724|ZPR1_SCHPO Zinc finger protein zpr1 OS=Schizosaccharomyces pombe (strain 972 / ATCC 24843) OX=284812 GN=zpr1 PE=3 SV=1	51.376	0	0	0
1.6	O13742	O13742	V-type proton ATPase subunit a	vph1	sp|O13742|VPH1_SCHPO V-type proton ATPase subunit a OS=Schizosaccharomyces pombe (strain 972 / ATCC 24843) OX=284812 GN=vph1 PE=3 SV=2	94.158	0	0	0
10.2	O13753	O13753	V-type proton ATPase subunit d	vma6	sp|O13753|VA0D_SCHPO V-type proton ATPase subunit d OS=Schizosaccharomyces pombe (strain 972 / ATCC 24843) OX=284812 GN=vma6 PE=3 SV=1	39.323	0	0	0
2	O13790	O13790	Cullin-1	cul1	sp|O13790|CUL1_SCHPO Cullin-1 OS=Schizosaccharomyces pombe (strain 972 / ATCC 24843) OX=284812 GN=cul1 PE=1 SV=1	89.425	0	0	0
1.8	O13796	O13796	Ribosome quality control complex subunit 1	rqc1	sp|O13796|RCQ1_SCHPO Ribosome quality control complex subunit 1 OS=Schizosaccharomyces pombe (strain 972 / ATCC 24843) OX=284812 GN=rqc1 PE=1 SV=2	75.014	0	0	0
12.6	O13802	O13802	Probable rRNA-processing protein ebp2	ebp2	sp|O13802|EBP2_SCHPO Probable rRNA-processing protein ebp2 OS=Schizosaccharomyces pombe (strain 972 / ATCC 24843) OX=284812 GN=ebp2 PE=1 SV=1	37.818	0	0	0
2.5	O13842	O13842	Chitin deacetylase 1	cda1	sp|O13842|CDA1_SCHPO Putative polysaccharide deacetylase OS=Schizosaccharomyces pombe (strain 972 / ATCC 24843) OX=284812 GN=cda1 PE=1 SV=1	36.206	0	0	0
0.9	O13849	O13849	Carboxypeptidase Y	cpy1	sp|O13849|CBPY_SCHPO Carboxypeptidase Y OS=Schizosaccharomyces pombe (strain 972 / ATCC 24843) OX=284812 GN=cpy1 PE=1 SV=1	114.24	0	0	0
1.3	O13853	O13853	Phosphatidylinositol 4-phosphate 5-kinase its3	its3	sp|O13853|ITS3_SCHPO Phosphatidylinositol 4-phosphate 5-kinase its3 OS=Schizosaccharomyces pombe (strain 972 / ATCC 24843) OX=284812 GN=its3 PE=1 SV=3	83.747	0	0	0
2	O13857;O13857-2	O13857;O13857-2	Putative lysophospholipase C1A6.03c	SPAC1A6.03c	sp|O13857|PLB2_SCHPO Putative lysophospholipase SPAC1A6.03c OS=Schizosaccharomyces pombe (strain 972 / ATCC 24843) OX=284812 GN=SPAC1A6.03c PE=3 SV=4;sp|O13857-2|PLB2_SCHPO Isoform 2 of Putative lysophospholipase SPAC1A6.03c OS=Schizosaccharomyces pombe (s	73.041	0	0	0
6.6	O13861	O13861	tRNA threonylcarbamoyladenosine dehydratase		sp|O13861|TCD_SCHPO tRNA threonylcarbamoyladenosine dehydratase OS=Schizosaccharomyces pombe (strain 972 / ATCC 24843) OX=284812 GN=SPAC1A6.10 PE=3 SV=1	54.299	0	0	0
1.4	O13864	O13864	Importin subunit beta-1	kap95	sp|O13864|IMB1_SCHPO Importin subunit beta-1 OS=Schizosaccharomyces pombe (strain 972 / ATCC 24843) OX=284812 GN=kap95 PE=3 SV=1	94.746	0	0	0
1.9	O13865	O13865	PAB-dependent poly(A)-specific ribonuclease subunit pan3-like	SPAC1B1.04c	sp|O13865|PAN3L_SCHPO PAB-dependent poly(A)-specific ribonuclease subunit pan3-like OS=Schizosaccharomyces pombe (strain 972 / ATCC 24843) OX=284812 GN=SPAC1B1.04c PE=1 SV=2	76.045	0	0	0
15.5	O13877	O13877	DNA-directed RNA polymerases I, II, and III subunit RPABC5	rpb10	sp|O13877|RPAB5_SCHPO DNA-directed RNA polymerases I, II, and III subunit RPABC5 OS=Schizosaccharomyces pombe (strain 972 / ATCC 24843) OX=284812 GN=rpb10 PE=1 SV=2	8.2757	0	0	0
3	O13880	O13880	Vitamin H transporter 1	vht1	sp|O13880|VHT1_SCHPO Vitamin H transporter 1 OS=Schizosaccharomyces pombe (strain 972 / ATCC 24843) OX=284812 GN=vht1 PE=2 SV=1	62.821	0	0	0
1.5	O13892	O13892	Uncharacterized protein C20G4.08		sp|O13892|YE38_SCHPO Uncharacterized protein C20G4.08 OS=Schizosaccharomyces pombe (strain 972 / ATCC 24843) OX=284812 GN=SPAC20G4.08 PE=1 SV=2	119.23	0	0	0
1.5	O13898	O13898	Dolichyl-phosphate-mannose--protein mannosyltransferase 1	ogm1	sp|O13898|PMT1_SCHPO Dolichyl-phosphate-mannose--protein mannosyltransferase 1 OS=Schizosaccharomyces pombe (strain 972 / ATCC 24843) OX=284812 GN=ogm1 PE=1 SV=1	101.33	0	0	0
8.5	O13920	O13920	LETM1 domain-containing protein mdm28, mitochondrial	mdm28	sp|O13920|MDM28_SCHPO LETM1 domain-containing protein mdm28, mitochondrial OS=Schizosaccharomyces pombe (strain 972 / ATCC 24843) OX=284812 GN=mdm28 PE=2 SV=3	55.723	0	0	0
9	O13927	O13927	Twin horsetail protein 2	tht2	sp|O13927|THT2_SCHPO Twin horsetail protein 2 OS=Schizosaccharomyces pombe (strain 972 / ATCC 24843) OX=284812 GN=tht2 PE=1 SV=1	23.511	0	0	0
9.9	O13929	O13929	Uncharacterized protein C23C4.09c	SPAC23C4.09c	sp|O13929|YF69_SCHPO Uncharacterized protein C23C4.09c OS=Schizosaccharomyces pombe (strain 972 / ATCC 24843) OX=284812 GN=SPAC23C4.09c PE=3 SV=1	15.042	0	0	0
2.6	O13933	O13933	Chitobiosyldiphosphodolichol beta-mannosyltransferase	alg1	sp|O13933|ALG1_SCHPO Chitobiosyldiphosphodolichol beta-mannosyltransferase OS=Schizosaccharomyces pombe (strain 972 / ATCC 24843) OX=284812 GN=alg1 PE=3 SV=2	48.726	0	0	0
6.7	O13935	O13935	Multisite-specific tRNA:(cytosine-C(5))-methyltransferase trm4b	trm4b	sp|O13935|TRM4B_SCHPO Multisite-specific tRNA:(cytosine-C(5))-methyltransferase trm4b OS=Schizosaccharomyces pombe (strain 972 / ATCC 24843) OX=284812 GN=trm4b PE=1 SV=2	77.821	0	0	0
1.5	O13936	O13936	Transcription elongation factor spt5	spt5	sp|O13936|SPT5_SCHPO Transcription elongation factor spt5 OS=Schizosaccharomyces pombe (strain 972 / ATCC 24843) OX=284812 GN=spt5 PE=1 SV=1	109.01	0	0	0
16.7	O13950	O13950	Signal recognition particle receptor subunit beta	srp102	sp|O13950|SRPB_SCHPO Signal recognition particle receptor subunit beta OS=Schizosaccharomyces pombe (strain 972 / ATCC 24843) OX=284812 GN=srp102 PE=3 SV=1	25.611	0	0	0
3.9	O13953	O13953	Chromatin modification-related protein eaf3	alp13	sp|O13953|EAF3_SCHPO Chromatin modification-related protein eaf3 OS=Schizosaccharomyces pombe (strain 972 / ATCC 24843) OX=284812 GN=alp13 PE=1 SV=1	39.138	0	0	0
7.1	O13963	O13963	Diphosphomevalonate decarboxylase	mvd1	sp|O13963|MVD1_SCHPO Diphosphomevalonate decarboxylase OS=Schizosaccharomyces pombe (strain 972 / ATCC 24843) OX=284812 GN=mvd1 PE=3 SV=1	42.755	0	0	0
2.5	O13968	O13968	Uncharacterized carboxypeptidase C24C9.08	SPAC24C9.08	sp|O13968|YE48_SCHPO Uncharacterized carboxypeptidase C24C9.08 OS=Schizosaccharomyces pombe (strain 972 / ATCC 24843) OX=284812 GN=SPAC24C9.08 PE=3 SV=1	66.606	0	0	0
1.4	O13989	O13989	Uncharacterized protein C26H5.07c	SPAC26H5.07c	sp|O13989|YEG7_SCHPO Uncharacterized protein C26H5.07c OS=Schizosaccharomyces pombe (strain 972 / ATCC 24843) OX=284812 GN=SPAC26H5.07c PE=3 SV=2	56.858	0	0	0
5.8	O14021	O14021	RbAp48-related WD40 repeat-containing protein prw1	prw1	sp|O14021|PRW1_SCHPO RbAp48-related WD40 repeat-containing protein prw1 OS=Schizosaccharomyces pombe (strain 972 / ATCC 24843) OX=284812 GN=prw1 PE=1 SV=1	48.476	0	0	0
4.6	O14023	O14023	Probable elongator complex protein 3	elp3	sp|O14023|ELP3_SCHPO elongator complex protein 3 OS=Schizosaccharomyces pombe (strain 972 / ATCC 24843) OX=284812 GN=elp3 PE=3 SV=1	61.849	0	0	0
3.7	O14044	O14044	Pre-rRNA-processing protein pno1	rbp28	sp|O14044|PNO1_SCHPO Pre-rRNA-processing protein pno1 OS=Schizosaccharomyces pombe (strain 972 / ATCC 24843) OX=284812 GN=rbp28 PE=1 SV=2	26.393	0	0	0
1.8	O14053	O14053	U3 small nucleolar RNA-associated protein 21 homolog	SPCC1672.07	sp|O14053|UTP21_SCHPO U3 small nucleolar RNA-associated protein 21 homolog OS=Schizosaccharomyces pombe (strain 972 / ATCC 24843) OX=284812 GN=SPCC1672.07 PE=3 SV=1	100.57	0	0	0
4.1	O14077	O14077	Putative zinc protease mug138	mug138	sp|O14077|MU138_SCHPO Putative zinc protease mug138 OS=Schizosaccharomyces pombe (strain 972 / ATCC 24843) OX=284812 GN=mug138 PE=1 SV=1	112.14	0	0	0
9.6	O14080	O14080	Uncharacterized protein UNK4,15		sp|O14080|YEAF_SCHPO Uncharacterized protein UNK4,15 OS=Schizosaccharomyces pombe (strain 972 / ATCC 24843) OX=284812 GN=SPAC2E11.15 PE=4 SV=1	23.655	0	0	0
12.3	O14082	O14082	Uncharacterized protein UNK4.17		sp|O14082|YEAH_SCHPO Uncharacterized protein UNK4.17 OS=Schizosaccharomyces pombe (strain 972 / ATCC 24843) OX=284812 GN=SPAC2E11.17 PE=4 SV=2	45.755	0	0	0
2.6	O14094	O14094	Putative exopolyphosphatase	SPAC2F3.11	sp|O14094|PPX1_SCHPO Putative exopolyphosphatase OS=Schizosaccharomyces pombe (strain 972 / ATCC 24843) OX=284812 GN=SPAC2F3.11 PE=3 SV=1	43.296	0	0	0
2.2	O14115	O14115	Patatin-like phospholipase domain-containing protein SPAC1786.01c		sp|O14115|TGL4_SCHPO Triacylglycerol lipase ptl2 OS=Schizosaccharomyces pombe (strain 972 / ATCC 24843) OX=284812 GN=ptl2 PE=3 SV=2	72.521	0	0	0
7.2	O14171	O14171	Dehydrodolichyl diphosphate syntase complex subunit SPAC4D7.04c	SPAC4D7.04c	sp|O14171|YE54_SCHPO Dehydrodolichyl diphosphate synthase complex subunit SPAC4D7.04c OS=Schizosaccharomyces pombe (strain 972 / ATCC 24843) OX=284812 GN=SPAC4D7.04c PE=1 SV=2	30.543	0	0	0
4.9	O14201	O14201	Meiotically up-regulated gene 86 protein	mug86	sp|O14201|MUG86_SCHPO Meiotically up-regulated gene 86 protein OS=Schizosaccharomyces pombe (strain 972 / ATCC 24843) OX=284812 GN=mug86 PE=1 SV=1	33.919	0	0	0
10.1	O14205	O14205	Vacuolar protein sorting-associated protein 74	vps74	sp|O14205|VPS74_SCHPO Vacuolar protein sorting-associated protein 74 OS=Schizosaccharomyces pombe (strain 972 / ATCC 24843) OX=284812 GN=vps74 PE=1 SV=2	38.375	0	0	0
4.1	O14206	O14206	Brix domain-containing protein C1B9.03c		sp|O14206|YDD3_SCHPO Brix domain-containing protein C1B9.03c OS=Schizosaccharomyces pombe (strain 972 / ATCC 24843) OX=284812 GN=SPAC1B9.03c PE=1 SV=2	44.261	0	0	0
7.2	O14225	O14225	Mitochondrial import receptor subunit tom20	tom20	sp|O14225|TOM20_SCHPO Mitochondrial import receptor subunit tom20 OS=Schizosaccharomyces pombe (strain 972 / ATCC 24843) OX=284812 GN=tom20 PE=3 SV=1	17.529	0	0	0
1.5	O14233	O14233	mRNA 3-end-processing protein rna14	rna14	sp|O14233|RNA14_SCHPO mRNA 3-end-processing protein rna14 OS=Schizosaccharomyces pombe (strain 972 / ATCC 24843) OX=284812 GN=rna14 PE=3 SV=1	83.925	0	0	0
3	O14249	O14249	probable cardiolipin-specific deacylase, mitochondrial	SPAC6G10.03c	sp|O14249|CLD1_SCHPO Probable cardiolipin-specific deacylase 1, mitochondrial OS=Schizosaccharomyces pombe (strain 972 / ATCC 24843) OX=284812 GN=SPAC6G10.03c PE=3 SV=1	48.72	0	0	0
1.7	O14253	O14253	Nuclear cap-binding protein subunit 1	cbc1	sp|O14253|NCBP1_SCHPO Nuclear cap-binding protein subunit 1 OS=Schizosaccharomyces pombe (strain 972 / ATCC 24843) OX=284812 GN=cbc1 PE=1 SV=1	90.077	0	0	0
3.3	O14265	O14265	V-type proton ATPase subunit H	vma13	sp|O14265|VATH_SCHPO V-type proton ATPase subunit H OS=Schizosaccharomyces pombe (strain 972 / ATCC 24843) OX=284812 GN=vma13 PE=3 SV=2	51.436	0	0	0
16.7	O14280	O14280	Uncharacterized bolA-like protein C8C9.11	SPAC8C9.11	sp|O14280|YETB_SCHPO Uncharacterized bolA-like protein C8C9.11 OS=Schizosaccharomyces pombe (strain 972 / ATCC 24843) OX=284812 GN=SPAC8C9.11 PE=3 SV=2	9.5279	0	0	0
2.7	O14307	O14307	tRNA (adenine(58)-N(1))-methyltransferase catalytic subunit trm61	cpd1	sp|O14307|TRM61_SCHPO tRNA (adenine(58)-N(1))-methyltransferase catalytic subunit trm61 OS=Schizosaccharomyces pombe (strain 972 / ATCC 24843) OX=284812 GN=cpd1 PE=3 SV=1	41.733	0	0	0
7	O14324	O14324	Uncharacterized membrane protein C16E9.09c	SPBC16E9.09c	sp|O14324|YB79_SCHPO Uncharacterized membrane protein C16E9.09c OS=Schizosaccharomyces pombe (strain 972 / ATCC 24843) OX=284812 GN=SPBC16E9.09c PE=3 SV=1	24.845	0	0	0
1.9	O14353	O14353	Biotin--protein ligase;Biotin--[methylmalonyl-CoA-carboxytransferase] ligase;Biotin--[propionyl-CoA-carboxylase [ATP-hydrolyzing]] ligase;Biotin--[methylcrotonoyl-CoA-carboxylase] ligase;Biotin--[acetyl-CoA-carboxylase] ligase	bpl1	sp|O14353|BPL1_SCHPO Biotin--protein ligase OS=Schizosaccharomyces pombe (strain 972 / ATCC 24843) OX=284812 GN=bpl1 PE=3 SV=1	70.631	0	0	0
17.9	O14399	O14399	Ubiquitin-like protein 1	ubl1	sp|O14399|UBL1_SCHPO Ubiquitin-like protein 1 OS=Schizosaccharomyces pombe (strain 972 / ATCC 24843) OX=284812 GN=ubl1 PE=3 SV=1	8.6609	0	0	0
20.3	O14466	O14466	Dolichol-phosphate mannosyltransferase	dpm1	sp|O14466|DPM1_SCHPO Dolichol-phosphate mannosyltransferase OS=Schizosaccharomyces pombe (strain 972 / ATCC 24843) OX=284812 GN=dpm1 PE=2 SV=1	26.672	0	0	0
3	O36021	O36021	Uncharacterized protein C4F10.09c	SPAC4F10.09c	sp|O36021|YEK9_SCHPO Uncharacterized protein C4F10.09c OS=Schizosaccharomyces pombe (strain 972 / ATCC 24843) OX=284812 GN=SPAC4F10.09c PE=1 SV=1	97.992	0	0	0
3.9	O36022	O36022	Mannan polymerase complex subunit mnn9	mnn9	sp|O36022|MNN9_SCHPO Mannan polymerase complex subunit mnn9 OS=Schizosaccharomyces pombe (strain 972 / ATCC 24843) OX=284812 GN=mnn9 PE=3 SV=1	38.296	0	0	0
5.8	O36025	O36025	GYF domain-containing protein mpd2	mpd2	sp|O36025|MPD2_SCHPO GYF domain-containing protein mpd2 OS=Schizosaccharomyces pombe (strain 972 / ATCC 24843) OX=284812 GN=mpd2 PE=1 SV=1	106.14	0	0	0
29.9	O42661	O42661	Small nuclear ribonucleoprotein Sm D1	smd1	sp|O42661|SMD1_SCHPO Small nuclear ribonucleoprotein Sm D1 OS=Schizosaccharomyces pombe (strain 972 / ATCC 24843) OX=284812 GN=smd1 PE=1 SV=1	13.089	0	0	0
4.8	O42665	O42665	Uncharacterized but2-like protein C27D7.11c	SPAC27D7.11c	sp|O42665|YF8B_SCHPO Uncharacterized but2-like protein C27D7.11c OS=Schizosaccharomyces pombe (strain 972 / ATCC 24843) OX=284812 GN=SPAC27D7.11c PE=3 SV=1	48.392	0	0	0
3.1	O42668	O42668	Tetratricopeptide repeat protein 1	tpr1	sp|O42668|TPR1_SCHPO Tetratricopeptide repeat protein 1 OS=Schizosaccharomyces pombe (strain 972 / ATCC 24843) OX=284812 GN=tpr1 PE=1 SV=1	119.15	0	0	0
50.6	O42706	O42706	60S ribosomal protein L21-B	rpl21b	sp|O42706|RL21B_SCHPO 60S ribosomal protein L21-B OS=Schizosaccharomyces pombe (strain 972 / ATCC 24843) OX=284812 GN=rpl2102 PE=2 SV=2	18.353	0	2	0
2	O42844	O42844	Calcium/calmodulin-dependent protein kinase type II	cmk2	sp|O42844|KCC2_SCHPO Calcium/calmodulin-dependent protein kinase type II OS=Schizosaccharomyces pombe (strain 972 / ATCC 24843) OX=284812 GN=cmk2 PE=1 SV=1	56.609	0	0	0
1.4	O42854	O42854	SH3 domain-containing protein C23A1.17	SPAC23A1.17	sp|O42854|YFHH_SCHPO SH3 domain-containing protein C23A1.17 OS=Schizosaccharomyces pombe (strain 972 / ATCC 24843) OX=284812 GN=SPAC23A1.17 PE=1 SV=1	170.53	0	0	0
4	O42861	O42861	ATP-dependent helicase fft3	fft3	sp|O42861|FFT3_SCHPO ATP-dependent helicase fft3 OS=Schizosaccharomyces pombe (strain 972 / ATCC 24843) OX=284812 GN=fft3 PE=1 SV=1	104.5	0	0	0
3	O42869	O42869	Uncharacterized protein C3G9.05	SPAC3G9.05	sp|O42869|YF75_SCHPO Uncharacterized protein C3G9.05 OS=Schizosaccharomyces pombe (strain 972 / ATCC 24843) OX=284812 GN=SPAC3G9.05 PE=1 SV=1	73.872	0	0	0
1.8	O42873	O42873	Putative pyruvate decarboxylase C3G9.11c	SPAC3G9.11c	sp|O42873|PDC4_SCHPO Putative pyruvate decarboxylase C3G9.11c OS=Schizosaccharomyces pombe (strain 972 / ATCC 24843) OX=284812 GN=SPAC3G9.11c PE=3 SV=1	62.652	0	0	0
3.9	O42887	O42887	Putative agmatinase 2	SPBC8E4.03	sp|O42887|SPEB2_SCHPO Putative agmatinase 2 OS=Schizosaccharomyces pombe (strain 972 / ATCC 24843) OX=284812 GN=SPBC8E4.03 PE=3 SV=1	45.901	0	0	0
10.3	O42897	O42897	Probable 26S proteasome regulatory subunit rpn3	rpn3	sp|O42897|RPN3_SCHPO Probable 26S proteasome regulatory subunit rpn3 OS=Schizosaccharomyces pombe (strain 972 / ATCC 24843) OX=284812 GN=rpn3 PE=3 SV=2	57.346	0	0	0
3.8	O42906	O42906	GPN-loop GTPase 1	SPBC119.15	sp|O42906|GPN1_SCHPO GPN-loop GTPase 1 OS=Schizosaccharomyces pombe (strain 972 / ATCC 24843) OX=284812 GN=SPBC119.15 PE=1 SV=1	41.642	0	0	0
2.6	O42908	O42908	Mitochondrial presequence protease	cym1	sp|O42908|CYM1_SCHPO Mitochondrial presequence protease OS=Schizosaccharomyces pombe (strain 972 / ATCC 24843) OX=284812 GN=cym1 PE=3 SV=1	98.969	0	0	0
6.2	O42947	O42947	Uncharacterized protein C16H5.12c	SPBC16H5.12c	sp|O42947|YBPC_SCHPO Uncharacterized protein C16H5.12c OS=Schizosaccharomyces pombe (strain 972 / ATCC 24843) OX=284812 GN=SPBC16H5.12c PE=1 SV=3	82.52	0	0	0
3.5	O42964	O42964	Transcription factor iws1	iws1	sp|O42964|IWS1_SCHPO Transcription factor iws1 OS=Schizosaccharomyces pombe (strain 972 / ATCC 24843) OX=284812 GN=iws1 PE=3 SV=1	49.114	0	0	0
17.6	O43002	O43002	Protein transport protein sec61 subunit beta	sbh1	sp|O43002|SC61B_SCHPO Protein transport protein sec61 subunit beta OS=Schizosaccharomyces pombe (strain 972 / ATCC 24843) OX=284812 GN=sbh1 PE=3 SV=1	10.444	0	0	0
3.5	O43007	O43007	C-1-tetrahydrofolate synthase, mitochondrial;Methylenetetrahydrofolate dehydrogenase;Methenyltetrahydrofolate cyclohydrolase;Formyltetrahydrofolate synthetase	ade9	sp|O43007|C1TM_SCHPO C-1-tetrahydrofolate synthase, mitochondrial OS=Schizosaccharomyces pombe (strain 972 / ATCC 24843) OX=284812 GN=ade9 PE=3 SV=3	105.76	0	0	0
11.8	O43030	O43030	Hsp70 nucleotide exchange factor fes1	fes1	sp|O43030|FES1_SCHPO Hsp70 nucleotide exchange factor fes1 OS=Schizosaccharomyces pombe (strain 972 / ATCC 24843) OX=284812 GN=fes1 PE=1 SV=1	32.744	0	0	0
3.1	O43042	O43042	54S ribosomal protein L3, mitochondrial	mrpl3	sp|O43042|RM03_SCHPO 54S ribosomal protein L3, mitochondrial OS=Schizosaccharomyces pombe (strain 972 / ATCC 24843) OX=284812 GN=mrpl3 PE=3 SV=1	37.195	0	0	0
7	O43079	O43079	AP-1 complex subunit beta-1	apl2	sp|O43079|AP1B1_SCHPO AP-1 complex subunit beta-1 OS=Schizosaccharomyces pombe (strain 972 / ATCC 24843) OX=284812 GN=apl2 PE=1 SV=1	76.681	0	0	0
3.6	O43090	O43090	Probable NADH-ubiquinone oxidoreductase C947.15c, mitochondrial	SPBC947.15c	sp|O43090|NDH2_SCHPO Probable NADH-ubiquinone oxidoreductase C947.15c, mitochondrial OS=Schizosaccharomyces pombe (strain 972 / ATCC 24843) OX=284812 GN=SPBC947.15c PE=3 SV=1	60.78	0	0	0
6	O59667	O59667	Histidine biosynthesis bifunctional protein his7;Phosphoribosyl-AMP cyclohydrolase;Phosphoribosyl-ATP pyrophosphatase	his7	sp|O59667|HIS2_SCHPO Histidine biosynthesis bifunctional protein his7 OS=Schizosaccharomyces pombe (strain 972 / ATCC 24843) OX=284812 GN=his7 PE=3 SV=1	46.182	0	0	0
5.7	O59672	O59672	Uncharacterized ABC transporter ATP-binding protein C29A3.09c	SPBC29A3.09c	sp|O59672|YB89_SCHPO Uncharacterized ABC transporter ATP-binding protein C29A3.09c OS=Schizosaccharomyces pombe (strain 972 / ATCC 24843) OX=284812 GN=SPBC29A3.09c PE=3 SV=1	83.761	0	0	0
15.7	O59678	O59678	Ribosome biogenesis regulatory protein homolog	SPBC29A3.16	sp|O59678|RRS1_SCHPO Ribosome biogenesis regulatory protein homolog OS=Schizosaccharomyces pombe (strain 972 / ATCC 24843) OX=284812 GN=SPBC29A3.16 PE=1 SV=1	19.044	0	0	0
4.6	O59700	O59700	Uncharacterized transporter C36.03c	SPBC36.03c	sp|O59700|YN43_SCHPO Uncharacterized transporter C36.03c OS=Schizosaccharomyces pombe (strain 972 / ATCC 24843) OX=284812 GN=SPBC36.03c PE=3 SV=1	59.169	0	0	0
18.4	O59727	O59727	Protein PBDC1 homolog	SPBC3E7.07c	sp|O59727|YHX7_SCHPO Protein PBDC1 homolog OS=Schizosaccharomyces pombe (strain 972 / ATCC 24843) OX=284812 GN=SPBC3E7.07c PE=3 SV=1	17.405	0	0	0
12.8	O59734	O59734	Small nuclear ribonucleoprotein F	smf1	sp|O59734|RUXF_SCHPO Small nuclear ribonucleoprotein F OS=Schizosaccharomyces pombe (strain 972 / ATCC 24843) OX=284812 GN=smf1 PE=1 SV=1	8.66	0	0	0
4.7	O59735	O59735	Sphingosine N-acyltransferase lac1	lac1	sp|O59735|LAC1_SCHPO Sphingosine N-acyltransferase lac1 OS=Schizosaccharomyces pombe (strain 972 / ATCC 24843) OX=284812 GN=lac1 PE=1 SV=2	45.335	0	0	0
5.9	O59760	O59760	Putative uncharacterized hydrolase C1020.07	SPCC1020.07	sp|O59760|YJM7_SCHPO Putative uncharacterized hydrolase C1020.07 OS=Schizosaccharomyces pombe (strain 972 / ATCC 24843) OX=284812 GN=SPCC1020.07 PE=3 SV=1	26.496	0	0	0
3	O59778	O59778	Biotin synthase	bio2	sp|O59778|BIOB_SCHPO Biotin synthase OS=Schizosaccharomyces pombe (strain 972 / ATCC 24843) OX=284812 GN=bio2 PE=1 SV=1	40.65	0	0	0
4.3	O59791	O59791	Serine racemase	SRR	sp|O59791|SRR_SCHPO Serine racemase OS=Schizosaccharomyces pombe (strain 972 / ATCC 24843) OX=284812 GN=SRR PE=1 SV=1	35.048	0	0	0
2.6	O59811	O59811	Cytoplasmic 60S subunit biogenesis factor SPCC550.15c	SPCC550.15c	sp|O59811|REI1_SCHPO Cytoplasmic 60S subunit biogenesis factor SPCC550.15c OS=Schizosaccharomyces pombe (strain 972 / ATCC 24843) OX=284812 GN=SPCC550.15c PE=1 SV=1	52.25	0	0	0
9.6	O59813	O59813	Uncharacterized amino-acid permease C794.03	SPCC794.03	sp|O59813|YCT3_SCHPO Uncharacterized amino-acid permease C794.03 OS=Schizosaccharomyces pombe (strain 972 / ATCC 24843) OX=284812 GN=SPCC794.03 PE=2 SV=1	60.857	0	0	0
3.9	O59823	O59823	V-type proton ATPase subunit D	vma8	sp|O59823|VATD_SCHPO V-type proton ATPase subunit D OS=Schizosaccharomyces pombe (strain 972 / ATCC 24843) OX=284812 GN=vma8 PE=1 SV=1	32.219	0	0	0
22.4	O59826	O59826	Putative voltage-gated potassium channel subunit beta	SPCC965.06	sp|O59826|KCAB_SCHPO Putative voltage-gated potassium channel subunit beta OS=Schizosaccharomyces pombe (strain 972 / ATCC 24843) OX=284812 GN=SPCC965.06 PE=3 SV=1	38.43	0	0	0
1.8	O60062	O60062	Homoserine O-acetyltransferase	met6	sp|O60062|MET2_SCHPO Homoserine O-acetyltransferase OS=Schizosaccharomyces pombe (strain 972 / ATCC 24843) OX=284812 GN=met6 PE=3 SV=1	54.31	0	0	0
3.1	O60071	O60071	Uncharacterized protein C13G1.09	SPBC13G1.09	sp|O60071|YBB9_SCHPO Uncharacterized protein C13G1.09 OS=Schizosaccharomyces pombe (strain 972 / ATCC 24843) OX=284812 GN=SPBC13G1.09 PE=1 SV=1	51.365	0	0	0
2.6	O60078	O60078	Probable prephenate dehydrogenase [NADP(+)]	tyr1	sp|O60078|TYR1_SCHPO Probable prephenate dehydrogenase [NADP(+)] OS=Schizosaccharomyces pombe (strain 972 / ATCC 24843) OX=284812 GN=tyr1 PE=2 SV=1	48.905	0	0	0
10.7	O60116	O60116	Putative ribokinase	SPBC16G5.02c	sp|O60116|RBSK_SCHPO Ribokinase OS=Schizosaccharomyces pombe (strain 972 / ATCC 24843) OX=284812 GN=rbk1 PE=3 SV=1	33.25	0	0	0
9	O60122	O60122	Anthranilate phosphoribosyltransferase	trp4	sp|O60122|TRPD_SCHPO Anthranilate phosphoribosyltransferase OS=Schizosaccharomyces pombe (strain 972 / ATCC 24843) OX=284812 GN=trp4 PE=3 SV=1	37.556	0	0	0
6.2	O60125	O60125	BAG family molecular chaperone regulator 1A	bag101	sp|O60125|BAG1A_SCHPO BAG family molecular chaperone regulator 1A OS=Schizosaccharomyces pombe (strain 972 / ATCC 24843) OX=284812 GN=bag101 PE=2 SV=1	22.205	0	0	0
3.5	O60164	O60164	Pescadillo homolog	ppp1	sp|O60164|PESC_SCHPO Pescadillo homolog OS=Schizosaccharomyces pombe (strain 972 / ATCC 24843) OX=284812 GN=ppp1 PE=3 SV=1	69.188	0	0	0
6.5	O60171	O60171	Transcription initiation factor TFIID subunit 10	taf10	sp|O60171|TAF10_SCHPO Transcription initiation factor TFIID subunit 10 OS=Schizosaccharomyces pombe (strain 972 / ATCC 24843) OX=284812 GN=taf10 PE=3 SV=1	23.526	0	0	0
1.7	O60172	O60172	Thiamine-repressible acid phosphatase SPBC21H7.03c	SPBC21H7.03c	sp|O60172|PPA3_SCHPO Thiamine-repressible acid phosphatase SPBC21H7.03c OS=Schizosaccharomyces pombe (strain 972 / ATCC 24843) OX=284812 GN=SPBC21H7.03c PE=2 SV=1	52.758	0	0	0
3.9	O60185	O60185	Methylthioribose-1-phosphate isomerase	mri1	sp|O60185|MTNA_SCHPO Methylthioribose-1-phosphate isomerase OS=Schizosaccharomyces pombe (strain 972 / ATCC 24843) OX=284812 GN=mri1 PE=3 SV=1	39.379	0	0	0
11.4	O74191	O74191	FK506-binding protein 39 kDa	fkbp39	sp|O74191|FKBP4_SCHPO FK506-binding protein 39 kDa OS=Schizosaccharomyces pombe (strain 972 / ATCC 24843) OX=284812 GN=fkbp39 PE=1 SV=1	39.301	0	0	0
1.7	O74354	O74354	Nucleolar protein dnt1	dnt1	sp|O74354|DNT1_SCHPO Nucleolar protein dnt1 OS=Schizosaccharomyces pombe (strain 972 / ATCC 24843) OX=284812 GN=dnt1 PE=1 SV=1	65.977	0	0	0
3.2	O74399	O74399	Ribosome biogenesis protein erb1	erb1	sp|O74399|ERB1_SCHPO Ribosome biogenesis protein erb1 OS=Schizosaccharomyces pombe (strain 972 / ATCC 24843) OX=284812 GN=erb1 PE=1 SV=2	82.944	0	0	0
2.2	O74400	O74400	Uncharacterized RNA-binding protein C4F6.14	SPBC4F6.14	sp|O74400|YOCE_SCHPO Uncharacterized RNA-binding protein C4F6.14 OS=Schizosaccharomyces pombe (strain 972 / ATCC 24843) OX=284812 GN=SPBC4F6.14 PE=1 SV=1	77.033	0	0	0
5.1	O74414	O74414	Uncharacterized protein C14G10.01		sp|O74414|YJL1_SCHPO Uncharacterized protein C14G10.01 OS=Schizosaccharomyces pombe (strain 972 / ATCC 24843) OX=284812 GN=SPCC14G10.01 PE=1 SV=1	26.828	0	0	0
10.1	O74416	O74416	Probable proteasome maturation factor ump1	ump1	sp|O74416|UMP1_SCHPO Probable proteasome maturation factor ump1 OS=Schizosaccharomyces pombe (strain 972 / ATCC 24843) OX=284812 GN=ump1 PE=3 SV=1	14.661	0	0	0
6.7	O74422	O74422	Uncharacterized protein C162.06c	SPCC162.06c	sp|O74422|YQ56_SCHPO Uncharacterized protein C162.06c OS=Schizosaccharomyces pombe (strain 972 / ATCC 24843) OX=284812 GN=SPCC162.06c PE=3 SV=1	23.591	0	0	0
2.1	O74429	O74429	Inositol hexakisphosphate and diphosphoinositol-pentakisphosphate kinase	asp1	sp|O74429|VIP1_SCHPO Inositol hexakisphosphate and diphosphoinositol-pentakisphosphate kinase OS=Schizosaccharomyces pombe (strain 972 / ATCC 24843) OX=284812 GN=asp1 PE=1 SV=1	105.68	0	0	0
9.6	O74440	O74440	26S proteasome regulatory subunit rpn8	rpn8	sp|O74440|RPN8_SCHPO 26S proteasome regulatory subunit rpn8 OS=Schizosaccharomyces pombe (strain 972 / ATCC 24843) OX=284812 GN=rpn8 PE=3 SV=1	35.595	0	0	0
5.8	O74446	O74446	Sad1-interacting factor 2	sif2	sp|O74446|SIF2_SCHPO Sad1-interacting factor 2 OS=Schizosaccharomyces pombe (strain 972 / ATCC 24843) OX=284812 GN=sif2 PE=1 SV=2	44.641	0	0	0
3.8	O74462	O74462	Transcription initiation factor TFIID subunit 6	taf6	sp|O74462|TAF6_SCHPO Transcription initiation factor TFIID subunit 6 OS=Schizosaccharomyces pombe (strain 972 / ATCC 24843) OX=284812 GN=taf6 PE=1 SV=1	50.272	0	0	0
3	O74468	O74468	Probable uroporphyrinogen-III C-methyltransferase	SPCC1739.06c	sp|O74468|SUMT_SCHPO Probable uroporphyrinogen-III C-methyltransferase OS=Schizosaccharomyces pombe (strain 972 / ATCC 24843) OX=284812 GN=SPCC1739.06c PE=2 SV=1	54.711	0	0	0
2.8	O74476	O74476	Importin subunit beta-3	sal3	sp|O74476|IMB3_SCHPO Importin subunit beta-3 OS=Schizosaccharomyces pombe (strain 972 / ATCC 24843) OX=284812 GN=sal3 PE=3 SV=1	121.87	0	0	0
9.3	O74480	O74480	Uncharacterized protein C1840.07c	SPCC1840.07c	sp|O74480|YQJ7_SCHPO Uncharacterized protein C1840.07c OS=Schizosaccharomyces pombe (strain 972 / ATCC 24843) OX=284812 GN=SPCC1840.07c PE=3 SV=1	37.435	0	0	0
17	O74483	O74483	U6 snRNA-associated Sm-like protein LSm8	lsm8	sp|O74483|LSM8_SCHPO U6 snRNA-associated Sm-like protein LSm8 OS=Schizosaccharomyces pombe (strain 972 / ATCC 24843) OX=284812 GN=lsm8 PE=1 SV=1	10.563	0	0	0
32.2	O74503	O74503	Upstream activation factor subunit spp27	spp27	sp|O74503|UAF30_SCHPO Upstream activation factor subunit spp27 OS=Schizosaccharomyces pombe (strain 972 / ATCC 24843) OX=284812 GN=spp27 PE=1 SV=1	26.651	0	0	0
1.5	O74521	O74521	Uncharacterized protein C663.15c	SPCC663.15c	sp|O74521|YCPF_SCHPO Uncharacterized protein C663.15c OS=Schizosaccharomyces pombe (strain 972 / ATCC 24843) OX=284812 GN=SPCC663.15c PE=4 SV=2	77.086	0	0	0
13.3	O74523	O74523	Putative ATPase inhibitor, mitochondrial	inh1	sp|O74523|ATIF_SCHPO Putative ATPase inhibitor, mitochondrial OS=Schizosaccharomyces pombe (strain 972 / ATCC 24843) OX=284812 GN=inh1 PE=3 SV=1	10.674	0	0	0
3.6	O74534	O74534	Protein sly1	sly1	sp|O74534|SLY1_SCHPO Protein sly1 OS=Schizosaccharomyces pombe (strain 972 / ATCC 24843) OX=284812 GN=sly1 PE=3 SV=1	71.664	0	0	0
5	O74545	O74545	Putative hydrolase C777.06c	SPCC777.06c	sp|O74545|YCV6_SCHPO Putative hydrolase C777.06c OS=Schizosaccharomyces pombe (strain 972 / ATCC 24843) OX=284812 GN=SPCC777.06c PE=4 SV=1	33.805	0	0	0
1.8	O74742	O74742	Probable folylpolyglutamate synthase	met7	sp|O74742|FOLE_SCHPO Probable folylpolyglutamate synthase OS=Schizosaccharomyces pombe (strain 972 / ATCC 24843) OX=284812 GN=met7 PE=2 SV=1	56.317	0	0	0
5.2	O74758	O74758	Uncharacterized protein C17D11.03c	SPBC17D11.03c	sp|O74758|PXP2_SCHPO Peroxisomal protein 2 OS=Schizosaccharomyces pombe (strain 972 / ATCC 24843) OX=284812 GN=SPBC17D11.03c PE=3 SV=1	23.489	0	0	0
4.3	O74791	O74791	GTPase grn1	grn1	sp|O74791|GRN1_SCHPO GTPase grn1 OS=Schizosaccharomyces pombe (strain 972 / ATCC 24843) OX=284812 GN=grn1 PE=1 SV=1	52.434	0	0	0
5	O74799	O74799	Glucan 1,3-beta-glucosidase 3	exg3	sp|O74799|EXG3_SCHPO Glucan 1,3-beta-glucosidase 3 OS=Schizosaccharomyces pombe (strain 972 / ATCC 24843) OX=284812 GN=exg3 PE=3 SV=1	53.701	0	0	0
3	O74803	O74803	UV excision repair protein rhp23	rhp23	sp|O74803|RHP23_SCHPO UV excision repair protein rhp23 OS=Schizosaccharomyces pombe (strain 972 / ATCC 24843) OX=284812 GN=rhp23 PE=1 SV=1	40.135	0	0	0
5.9	O74821	O74821	Fe-S cluster assembly protein dre2	dre2	sp|O74821|DRE2_SCHPO Fe-S cluster assembly protein dre2 OS=Schizosaccharomyces pombe (strain 972 / ATCC 24843) OX=284812 GN=dre2 PE=3 SV=1	31.534	0	0	0
1.6	O74835	O74835	rRNA biogenesis protein rrp5	rrp5	sp|O74835|RRP5_SCHPO rRNA biogenesis protein rrp5 OS=Schizosaccharomyces pombe (strain 972 / ATCC 24843) OX=284812 GN=rrp5 PE=1 SV=1	187.52	0	0	0
3.9	O74856	O74856	Poly(A) ribonuclease pop2	caf1	sp|O74856|CAF1_SCHPO Poly(A) ribonuclease pop2 OS=Schizosaccharomyces pombe (strain 972 / ATCC 24843) OX=284812 GN=caf1 PE=1 SV=2	37.533	0	0	0
3.2	O74878	O74878	GDP-Man:Man(3)GlcNAc(2)-PP-Dol alpha-1,2-mannosyltransferase	alg11	sp|O74878|ALG11_SCHPO GDP-Man:Man(3)GlcNAc(2)-PP-Dol alpha-1,2-mannosyltransferase OS=Schizosaccharomyces pombe (strain 972 / ATCC 24843) OX=284812 GN=alg11 PE=3 SV=1	53.277	0	0	0
1.9	O74879	O74879	Ribosome biogenesis protein enp2 homolog	enp2	sp|O74879|NOL10_SCHPO Ribosome biogenesis protein enp2 homolog OS=Schizosaccharomyces pombe (strain 972 / ATCC 24843) OX=284812 GN=enp2 PE=1 SV=1	72.238	0	0	0
7.4	O74891	O74891	Probable coatomer subunit zeta	ret3	sp|O74891|COPZ_SCHPO Probable coatomer subunit zeta OS=Schizosaccharomyces pombe (strain 972 / ATCC 24843) OX=284812 GN=ret3 PE=3 SV=1	21.686	0	0	0
3.9	O74898	O74898	Diphthine synthase	dph5	sp|O74898|DPH5_SCHPO Diphthine methyl ester synthase OS=Schizosaccharomyces pombe (strain 972 / ATCC 24843) OX=284812 GN=dph5 PE=3 SV=1	32.043	0	0	0
10.5	O74927	O74927	Methylenetetrahydrofolate reductase 2	met11	sp|O74927|MTHR2_SCHPO Methylenetetrahydrofolate reductase 2 OS=Schizosaccharomyces pombe (strain 972 / ATCC 24843) OX=284812 GN=met11 PE=1 SV=2	72.139	0	0	0
5.7	O74940	O74940	Putative glutamine-dependent NAD(+) synthetase	SPCC553.02	sp|O74940|NADE_SCHPO Putative glutamine-dependent NAD(+) synthetase OS=Schizosaccharomyces pombe (strain 972 / ATCC 24843) OX=284812 GN=SPCC553.02 PE=3 SV=1	79.519	0	0	0
18.8	O74965	O74965	Eukaryotic translation initiation factor 2A	SPBC4B4.04	sp|O74965|EIF2A_SCHPO Eukaryotic translation initiation factor 2A OS=Schizosaccharomyces pombe (strain 972 / ATCC 24843) OX=284812 GN=SPBC4B4.04 PE=1 SV=1	63.496	0	0	0
4.2	O74970	O74970	Pre-mRNA-processing factor 39	prp39	sp|O74970|PRP39_SCHPO Pre-mRNA-processing factor 39 OS=Schizosaccharomyces pombe (strain 972 / ATCC 24843) OX=284812 GN=prp39 PE=3 SV=1	71.246	0	0	0
9.1	O74978	O74978	Uncharacterized RNA-binding protein C1827.05c	SPCC1827.05c	sp|O74978|YQL5_SCHPO Uncharacterized RNA-binding protein C1827.05c OS=Schizosaccharomyces pombe (strain 972 / ATCC 24843) OX=284812 GN=SPCC1827.05c PE=4 SV=1	31.404	0	0	0
3.2	O94257	O94257	Leucine carboxyl methyltransferase 1	ppm1	sp|O94257|LCMT1_SCHPO Leucine carboxyl methyltransferase 1 OS=Schizosaccharomyces pombe (strain 972 / ATCC 24843) OX=284812 GN=ppm1 PE=3 SV=1	35.855	0	0	0
14.7	O94260	O94260	Putative G3BP-like protein	nxt3	sp|O94260|G3BP_SCHPO Putative G3BP-like protein OS=Schizosaccharomyces pombe (strain 972 / ATCC 24843) OX=284812 GN=nxt3 PE=1 SV=1	47.972	0	0	0
5.3	O94274	O94274	Uncharacterized protein P8B7.26	SPBP8B7.26	sp|O94274|YORQ_SCHPO Uncharacterized protein P8B7.26 OS=Schizosaccharomyces pombe (strain 972 / ATCC 24843) OX=284812 GN=SPBP8B7.26 PE=4 SV=2	27.489	0	0	0
12.4	O94286	O94286	1,2-dihydroxy-3-keto-5-methylthiopentene dioxygenase	adi1	sp|O94286|MTND_SCHPO 1,2-dihydroxy-3-keto-5-methylthiopentene dioxygenase OS=Schizosaccharomyces pombe (strain 972 / ATCC 24843) OX=284812 GN=adi1 PE=1 SV=1	20.936	0	0	0
4.3	O94289	O94289	Ubiquitin homeostasis protein lub1	lub1	sp|O94289|LUB1_SCHPO Ubiquitin homeostasis protein lub1 OS=Schizosaccharomyces pombe (strain 972 / ATCC 24843) OX=284812 GN=lub1 PE=1 SV=2	79.221	0	0	0
7.1	O94307	O94307	Probable prefoldin subunit 5	bob1	sp|O94307|PFD5_SCHPO Probable prefoldin subunit 5 OS=Schizosaccharomyces pombe (strain 972 / ATCC 24843) OX=284812 GN=bob1 PE=1 SV=1	16.774	0	0	0
6	O94314	O94314	Uncharacterized hydrolase C215.10	SPBC215.10	sp|O94314|YH5A_SCHPO Uncharacterized hydrolase C215.10 OS=Schizosaccharomyces pombe (strain 972 / ATCC 24843) OX=284812 GN=SPBC215.10 PE=3 SV=1	33.261	0	0	0
3.9	O94322	O94322	Uncharacterized protein C725.03	SPBC725.03	sp|O94322|YGK3_SCHPO Uncharacterized protein C725.03 OS=Schizosaccharomyces pombe (strain 972 / ATCC 24843) OX=284812 GN=SPBC725.03 PE=4 SV=1	29.272	0	0	0
1.5	O94326	O94326	Zinc finger protein C725.08	SPBC725.08	sp|O94326|PIR2_SCHPO NURS complex subunit pir2 OS=Schizosaccharomyces pombe (strain 972 / ATCC 24843) OX=284812 GN=pir2 PE=1 SV=1	70.864	0	0	0
3.1	O94335	O94335	Dolichyl-diphosphooligosaccharide--protein glycosyltransferase subunit stt3	stt3	sp|O94335|STT3_SCHPO Dolichyl-diphosphooligosaccharide--protein glycosyltransferase subunit stt3 OS=Schizosaccharomyces pombe (strain 972 / ATCC 24843) OX=284812 GN=stt3 PE=3 SV=1	84.973	0	0	0
2.9	O94361	O94361	Uncharacterized acyltransferase C428.14	SPBC428.14	sp|O94361|YHOE_SCHPO Uncharacterized acyltransferase C428.14 OS=Schizosaccharomyces pombe (strain 972 / ATCC 24843) OX=284812 GN=SPBC428.14 PE=3 SV=1	41.354	0	0	0
2.4	O94378	O94378	Uncharacterized protein C1604.12	SPBC1604.12	sp|O94378|YG0C_SCHPO Uncharacterized protein C1604.12 OS=Schizosaccharomyces pombe (strain 972 / ATCC 24843) OX=284812 GN=SPBC1604.12 PE=1 SV=1	93.285	0	0	0
8.6	O94390	O94390	ATP synthase subunit d, mitochondrial	atp7	sp|O94390|ATP7_SCHPO ATP synthase subunit d, mitochondrial OS=Schizosaccharomyces pombe (strain 972 / ATCC 24843) OX=284812 GN=atp7 PE=3 SV=3	19.138	0	0	0
4.9	O94396	O94396	tRNA pseudouridine synthase 1	pus1	sp|O94396|PUS1_SCHPO tRNA pseudouridine synthase 1 OS=Schizosaccharomyces pombe (strain 972 / ATCC 24843) OX=284812 GN=pus1 PE=1 SV=1	60.323	0	0	0
9.8	O94399	O94399	Twinfilin	twf1	sp|O94399|TWF1_SCHPO Twinfilin OS=Schizosaccharomyces pombe (strain 972 / ATCC 24843) OX=284812 GN=twf1 PE=1 SV=1	36.78	0	0	0
5	O94404	O94404	Protein NIF3 homolog	SPCC126.12	sp|O94404|NIF3_SCHPO Protein NIF3 homolog OS=Schizosaccharomyces pombe (strain 972 / ATCC 24843) OX=284812 GN=SPCC126.12 PE=3 SV=1	29.85	0	0	0
3	O94415	O94415	Probable succinyl-CoA ligase [GDP-forming] subunit beta, mitochondrial	SPCC1620.08	sp|O94415|SUCB_SCHPO Succinate--CoA ligase [ADP-forming] subunit beta, mitochondrial OS=Schizosaccharomyces pombe (strain 972 / ATCC 24843) OX=284812 GN=SPCC1620.08 PE=3 SV=1	47.287	0	0	0
7.8	O94424	O94424	Transcription initiation factor IIF subunit beta	tfg2	sp|O94424|T2FB_SCHPO Transcription initiation factor IIF subunit beta OS=Schizosaccharomyces pombe (strain 972 / ATCC 24843) OX=284812 GN=tfg2 PE=1 SV=1	34.622	0	0	0
7.7	O94435	O94435	Meiotically up-regulated gene 35 protein	mug35	sp|O94435|MUG35_SCHPO Meiotically up-regulated gene 35 protein OS=Schizosaccharomyces pombe (strain 972 / ATCC 24843) OX=284812 GN=mug35 PE=1 SV=2	27.521	0	0	0
1.7	O94441	O94441	Putative cargo-transport protein ypp1	ypp1	sp|O94441|YPP1_SCHPO Putative cargo-transport protein ypp1 OS=Schizosaccharomyces pombe (strain 972 / ATCC 24843) OX=284812 GN=ypp1 PE=1 SV=1	98.306	0	0	0
4.4	O94442	O94442	Cytosolic Fe-S cluster assembly factor nbp35	nbp35	sp|O94442|NBP35_SCHPO Cytosolic Fe-S cluster assembly factor nbp35 OS=Schizosaccharomyces pombe (strain 972 / ATCC 24843) OX=284812 GN=nbp35 PE=3 SV=1	34.261	0	0	0
4.4	O94447	O94447	Cytoskeletal signaling protein slm1	slm1	sp|O94447|SLM1_SCHPO Cytoskeletal signaling protein slm1 OS=Schizosaccharomyces pombe (strain 972 / ATCC 24843) OX=284812 GN=slm1 PE=1 SV=1	56.087	0	0	0
5.1	O94465	O94465	Protein cms1	cms1	sp|O94465|CMS1_SCHPO Protein cms1 OS=Schizosaccharomyces pombe (strain 972 / ATCC 24843) OX=284812 GN=cms1 PE=3 SV=1	31.625	0	0	0
2.3	O94486	O94486	Chitin synthase regulatory factor 2	chr2	sp|O94486|CHR2_SCHPO Chitin synthase regulatory factor 2 OS=Schizosaccharomyces pombe (strain 972 / ATCC 24843) OX=284812 GN=chr2 PE=3 SV=1	58.42	0	0	0
18.1	O94505	O94505	3(2),5-bisphosphate nucleotidase	tol1	sp|O94505|DPNP_SCHPO 3(2),5-bisphosphate nucleotidase OS=Schizosaccharomyces pombe (strain 972 / ATCC 24843) OX=284812 GN=tol1 PE=3 SV=1	38.747	0	0	0
6.8	O94529	O94529	FACT complex subunit pob3	pob3	sp|O94529|POB3_SCHPO FACT complex subunit pob3 OS=Schizosaccharomyces pombe (strain 972 / ATCC 24843) OX=284812 GN=pob3 PE=3 SV=1	57.456	0	0	0
7.8	O94544	O94544	Leukotriene A-4 hydrolase homolog	SPCC1322.05c	sp|O94544|LKHA4_SCHPO Leucine aminopeptidase 2 OS=Schizosaccharomyces pombe (strain 972 / ATCC 24843) OX=284812 GN=lap2 PE=3 SV=1	69.521	0	0	0
4.2	O94550	O94550	Prohibitin-2	phb2	sp|O94550|PHB2_SCHPO Prohibitin-2 OS=Schizosaccharomyces pombe (strain 972 / ATCC 24843) OX=284812 GN=phb2 PE=1 SV=2	32.338	0	0	0
1.9	O94559	O94559	Uncharacterized protein C23C4.05c	SPAC23C4.05c	sp|O94559|LES1_SCHPO Nuclear bridge Ish domain protein les1 OS=Schizosaccharomyces pombe (strain 972 / ATCC 24843) OX=284812 GN=les1 PE=3 SV=1	49.532	0	0	0
14	O94581	O94581	Cytochrome c oxidase subunit 6B	cox12	sp|O94581|COX12_SCHPO Cytochrome c oxidase subunit 12, mitochondrial OS=Schizosaccharomyces pombe (strain 972 / ATCC 24843) OX=284812 GN=cox12 PE=3 SV=2	10.264	0	0	0
5.2	O94615	O94615	Pentatricopeptide repeat-containing protein 8, mitochondrial	ppr8	sp|O94615|PPR8_SCHPO Pentatricopeptide repeat-containing protein 8, mitochondrial OS=Schizosaccharomyces pombe (strain 972 / ATCC 24843) OX=284812 GN=ppr8 PE=4 SV=1	54.652	0	0	0
4	O94660	O94660	Probable hydrolase nit2	nit2	sp|O94660|NIT2_SCHPO Probable hydrolase nit2 OS=Schizosaccharomyces pombe (strain 972 / ATCC 24843) OX=284812 GN=nit2 PE=3 SV=1	30.421	0	0	0
3.5	O94672	O94672	Protein transport protein sec23-2	sec232	sp|O94672|SC232_SCHPO Protein transport protein sec23-2 OS=Schizosaccharomyces pombe (strain 972 / ATCC 24843) OX=284812 GN=sec232 PE=1 SV=1	85.381	0	1	0
2	O94681	O94681	Probable dihydrolipoyllysine-residue succinyltransferase component of 2-oxoglutarate dehydrogenase complex, mitochondrial	kgd2	sp|O94681|ODO2_SCHPO Probable dihydrolipoyllysine-residue succinyltransferase component of 2-oxoglutarate dehydrogenase complex, mitochondrial OS=Schizosaccharomyces pombe (strain 972 / ATCC 24843) OX=284812 GN=kgd2 PE=3 SV=1	48.964	0	0	0
27.7	O94686	O94686	60S ribosomal protein L43-B	rpl43b	sp|O94686|RL43B_SCHPO 60S ribosomal protein L43-B OS=Schizosaccharomyces pombe (strain 972 / ATCC 24843) OX=284812 GN=rpl4302 PE=3 SV=1	10.38	0	0	0
2.4	O94702	O94702	Putative endoplasmic reticulum metallopeptidase 1	erm1	sp|O94702|ERMP1_SCHPO Putative endoplasmic reticulum metallopeptidase 1 OS=Schizosaccharomyces pombe (strain 972 / ATCC 24843) OX=284812 GN=erm1 PE=3 SV=1	91.841	0	0	0
2.9	O94709	O94709	Probable pyruvate dehydrogenase protein X component, mitochondrial	SPCC1259.09c	sp|O94709|ODPX_SCHPO Probable pyruvate dehydrogenase protein X component, mitochondrial OS=Schizosaccharomyces pombe (strain 972 / ATCC 24843) OX=284812 GN=SPCC1259.09c PE=2 SV=1	50.883	0	0	0
3.5	O94752	O94752	Enhancer of mRNA-decapping protein 3	edc3	sp|O94752|EDC3_SCHPO Enhancer of mRNA-decapping protein 3 OS=Schizosaccharomyces pombe (strain 972 / ATCC 24843) OX=284812 GN=edc3 PE=1 SV=1	49.218	0	0	0
5.4	P04551	P04551	Cyclin-dependent kinase 1	cdc2	sp|P04551|CDK1_SCHPO Cyclin-dependent kinase 1 OS=Schizosaccharomyces pombe (strain 972 / ATCC 24843) OX=284812 GN=cdc2 PE=1 SV=1	34.358	0	0	0
56.9	P05752	P05752	40S ribosomal protein S6-A	rps6a	sp|P05752|RS6A_SCHPO 40S ribosomal protein S6-A OS=Schizosaccharomyces pombe (strain 972 / ATCC 24843) OX=284812 GN=rps601 PE=1 SV=2	27.499	0	9	0
23.3	P05933	P05933	Calmodulin	cam1	sp|P05933|CALM_SCHPO Calmodulin OS=Schizosaccharomyces pombe (strain 972 / ATCC 24843) OX=284812 GN=cam1 PE=1 SV=1	16.905	0	0	0
11.5	P08463	P08463	Cyclin-dependent kinases regulatory subunit	suc1	sp|P08463|CKS1_SCHPO Cyclin-dependent kinases regulatory subunit OS=Schizosaccharomyces pombe (strain 972 / ATCC 24843) OX=284812 GN=suc1 PE=1 SV=3	13.446	0	0	0
77	P0CT53	P0CT53			sp|P0CT53|EF1A1_SCHPO Elongation factor 1-alpha-A OS=Schizosaccharomyces pombe (strain 972 / ATCC 24843) OX=284812 GN=tef101 PE=1 SV=1	49.66	0	32	0
1.3	P14068	P14068	Exportin-1	xpo1	sp|P14068|XPO1_SCHPO Exportin-1 OS=Schizosaccharomyces pombe (strain 972 / ATCC 24843) OX=284812 GN=xpo1 PE=1 SV=3	123.57	0	0	0
6.8	P14965	P14965	Orotidine 5-phosphate decarboxylase	ura4	sp|P14965|PYRF_SCHPO Orotidine 5-phosphate decarboxylase OS=Schizosaccharomyces pombe (strain 972 / ATCC 24843) OX=284812 GN=ura4 PE=3 SV=1	29.361	0	0	0
15.3	P17937	P17937	60S ribosomal protein L7-A	rpl7a	sp|P17937|RL7A_SCHPO 60S ribosomal protein L7-A OS=Schizosaccharomyces pombe (strain 972 / ATCC 24843) OX=284812 GN=rlp7 PE=3 SV=1	29.165	0	0	0
11.6	P21911	P21911	Succinate dehydrogenase [ubiquinone] iron-sulfur subunit, mitochondrial	sdh2	sp|P21911|SDHB_SCHPO Succinate dehydrogenase [ubiquinone] iron-sulfur subunit, mitochondrial OS=Schizosaccharomyces pombe (strain 972 / ATCC 24843) OX=284812 GN=sdh2 PE=3 SV=3	31.425	0	0	0
4.2	P22194	P22194	Protein phosphatase 1 regulatory subunit SDS22	sds22	sp|P22194|SDS22_SCHPO Protein phosphatase 1 regulatory subunit SDS22 OS=Schizosaccharomyces pombe (strain 972 / ATCC 24843) OX=284812 GN=sds22 PE=1 SV=2	38.066	0	0	0
4.7	P23880	P23880	Serine/threonine-protein phosphatase PP1-2	sds21	sp|P23880|PP12_SCHPO Serine/threonine-protein phosphatase PP1-2 OS=Schizosaccharomyces pombe (strain 972 / ATCC 24843) OX=284812 GN=sds21 PE=3 SV=1	36.829	0	0	0
2.2	P27574	P27574	Tyrosine-protein phosphatase 1	pyp1	sp|P27574|PYP1_SCHPO Tyrosine-protein phosphatase 1 OS=Schizosaccharomyces pombe (strain 972 / ATCC 24843) OX=284812 GN=pyp1 PE=1 SV=1	61.587	0	0	0
7.6	P28745	P28745	Protein pim1	pim1	sp|P28745|RCC1_SCHPO Protein pim1 OS=Schizosaccharomyces pombe (strain 972 / ATCC 24843) OX=284812 GN=pim1 PE=1 SV=2	58.349	0	0	0
1.3	P29458	P29458	DNA replication licensing factor mcm4	mcm4	sp|P29458|MCM4_SCHPO DNA replication licensing factor mcm4 OS=Schizosaccharomyces pombe (strain 972 / ATCC 24843) OX=284812 GN=mcm4 PE=1 SV=2	103.73	0	0	0
10.3	P30655	P30655	Probable proteasome subunit beta type-5	pts1	sp|P30655|PSB5_SCHPO Probable proteasome subunit beta type-5 OS=Schizosaccharomyces pombe (strain 972 / ATCC 24843) OX=284812 GN=pts1 PE=3 SV=3	29.986	0	0	0
1.3	P30666	P30666	DNA replication licensing factor mcm3	mcm3	sp|P30666|MCM3_SCHPO DNA replication licensing factor mcm3 OS=Schizosaccharomyces pombe (strain 972 / ATCC 24843) OX=284812 GN=mcm3 PE=1 SV=2	97.48	0	0	0
7	P31317	P31317	Ornithine carbamoyltransferase, mitochondrial	arg3	sp|P31317|OTC_SCHPO Ornithine carbamoyltransferase, mitochondrial OS=Schizosaccharomyces pombe (strain 972 / ATCC 24843) OX=284812 GN=arg3 PE=1 SV=1	36.119	0	0	0
2.8	P33886	P33886	Protein kinase wis1	wis1	sp|P33886|WIS1_SCHPO Protein kinase wis1 OS=Schizosaccharomyces pombe (strain 972 / ATCC 24843) OX=284812 GN=wis1 PE=1 SV=1	64.762	0	0	0
31.1	P36585	P36585	60S ribosomal protein L28-A	rpl28a	sp|P36585|RL28A_SCHPO 60S ribosomal protein L28-A OS=Schizosaccharomyces pombe (strain 972 / ATCC 24843) OX=284812 GN=rpl2802 PE=3 SV=3	16.653	0	3	0
1.8	P36594	P36594	DNA-directed RNA polymerase II subunit rpb1	rpb1	sp|P36594|RPB1_SCHPO DNA-directed RNA polymerase II subunit rpb1 OS=Schizosaccharomyces pombe (strain 972 / ATCC 24843) OX=284812 GN=rpb1 PE=1 SV=1	194.16	0	0	0
6.1	P36600	P36600	cAMP-dependent protein kinase regulatory subunit	cgs1	sp|P36600|KAPR_SCHPO cAMP-dependent protein kinase regulatory subunit OS=Schizosaccharomyces pombe (strain 972 / ATCC 24843) OX=284812 GN=cgs1 PE=1 SV=2	46.468	0	0	0
20	P36614	P36614	Serine/threonine-protein phosphatase ppe1	ppe1	sp|P36614|PPE1_SCHPO Serine/threonine-protein phosphatase ppe1 OS=Schizosaccharomyces pombe (strain 972 / ATCC 24843) OX=284812 GN=ppe1 PE=1 SV=1	35.259	0	0	0
9.8	P36621	P36621	Adenylyl cyclase-associated protein	cap1	sp|P36621|CAP_SCHPO Adenylyl cyclase-associated protein OS=Schizosaccharomyces pombe (strain 972 / ATCC 24843) OX=284812 GN=cap1 PE=1 SV=1	60.243	0	0	0
6.4	P37382	P37382	DNA-directed RNA polymerase II subunit RPB3	rpb3	sp|P37382|RPB3_SCHPO DNA-directed RNA polymerase II subunit RPB3 OS=Schizosaccharomyces pombe (strain 972 / ATCC 24843) OX=284812 GN=rpb3 PE=1 SV=2	33.716	0	0	0
1.8	P40377	P40377	DNA replication licensing factor mcm2	mcm2	sp|P40377|MCM2_SCHPO DNA replication licensing factor mcm2 OS=Schizosaccharomyces pombe (strain 972 / ATCC 24843) OX=284812 GN=mcm2 PE=1 SV=1	92.83	0	0	0
1.7	P40383	P40383	5-3 exoribonuclease 1	exo2	sp|P40383|XRN1_SCHPO 5-3 exoribonuclease 1 OS=Schizosaccharomyces pombe (strain 972 / ATCC 24843) OX=284812 GN=exo2 PE=1 SV=1	152.59	0	0	0
1.6	P40848	P40848	5-3 exoribonuclease 2	dhp1	sp|P40848|XRN2_SCHPO 5-3 exoribonuclease 2 OS=Schizosaccharomyces pombe (strain 972 / ATCC 24843) OX=284812 GN=dhp1 PE=1 SV=1	112.37	0	0	0
10.2	P41838	P41838	Poly(A)+ RNA export protein	rae1	sp|P41838|RAE1_SCHPO Poly(A)+ RNA export protein OS=Schizosaccharomyces pombe (strain 972 / ATCC 24843) OX=284812 GN=rae1 PE=1 SV=1	38.626	0	0	0
5.1	P41893	P41893	Low molecular weight phosphotyrosine protein phosphatase	stp1	sp|P41893|PPAL_SCHPO Low molecular weight phosphotyrosine protein phosphatase OS=Schizosaccharomyces pombe (strain 972 / ATCC 24843) OX=284812 GN=stp1 PE=2 SV=1	17.391	0	0	0
5.5	P49373	P49373	Transcription elongation factor S-II	tfs1	sp|P49373|TFS2_SCHPO Transcription elongation factor S-II OS=Schizosaccharomyces pombe (strain 972 / ATCC 24843) OX=284812 GN=tfs1 PE=3 SV=1	32.734	0	0	0
11.2	P50515	P50515	V-type proton ATPase 16 kDa proteolipid subunit	vma3	sp|P50515|VATL_SCHPO V-type proton ATPase 16 kDa proteolipid subunit OS=Schizosaccharomyces pombe (strain 972 / ATCC 24843) OX=284812 GN=vma3 PE=3 SV=1	16.325	0	0	0
14.1	P50523	P50523	Cytochrome b-c1 complex subunit 8	qcr8	sp|P50523|QCR8_SCHPO Cytochrome b-c1 complex subunit 8 OS=Schizosaccharomyces pombe (strain 972 / ATCC 24843) OX=284812 GN=qcr8 PE=3 SV=1	10.467	0	0	0
4.1	P50537	P50537	Malic acid transport protein	mae1	sp|P50537|MAE1_SCHPO Malic acid transport protein OS=Schizosaccharomyces pombe (strain 972 / ATCC 24843) OX=284812 GN=mae1 PE=1 SV=1	49.304	0	0	0
2.3	P53694	P53694	Reticulon-like protein 1	rtn1	sp|P53694|RTN1_SCHPO Reticulon-like protein 1 OS=Schizosaccharomyces pombe (strain 972 / ATCC 24843) OX=284812 GN=rtn1 PE=1 SV=1	33.659	0	0	0
5.9	P56288	P56288	Probable translation initiation factor eIF-2B subunit gamma	tif223	sp|P56288|EI2BG_SCHPO Probable translation initiation factor eIF-2B subunit gamma OS=Schizosaccharomyces pombe (strain 972 / ATCC 24843) OX=284812 GN=tif223 PE=1 SV=2	50.461	0	0	0
2.1	P78750	P78750	Probable U3 small nucleolar RNA-associated protein 18	SPBC29A3.06	sp|P78750|UTP18_SCHPO Probable U3 small nucleolar RNA-associated protein 18 OS=Schizosaccharomyces pombe (strain 972 / ATCC 24843) OX=284812 GN=SPBC29A3.06 PE=2 SV=3	58.444	0	0	0
5.4	P78898	P78898	Probable lipase C16A3.12c	SPBC16A3.12c	sp|P78898|TGCE2_SCHPO Probable lipase C16A3.12c OS=Schizosaccharomyces pombe (strain 972 / ATCC 24843) OX=284812 GN=SPBC16A3.12c PE=3 SV=2	51.547	0	0	0
2.1	P78920	P78920	Putative nucleosome assembly protein C2D10.11C	SPBC2D10.11c	sp|P78920|YGNB_SCHPO Putative nucleosome assembly protein C2D10.11C OS=Schizosaccharomyces pombe (strain 972 / ATCC 24843) OX=284812 GN=SPBC2D10.11c PE=2 SV=2	43.37	0	0	0
43.4	P79016	P79016	40S ribosomal protein S19-B	rps19b	sp|P79016|RS19B_SCHPO 40S ribosomal protein S19-B OS=Schizosaccharomyces pombe (strain 972 / ATCC 24843) OX=284812 GN=rps1902 PE=3 SV=2	16.062	0	1	0
8.9	P79081	P79081	N-acetyltransferase ats1	ats1	sp|P79081|ATS1_SCHPO N-acetyltransferase ats1 OS=Schizosaccharomyces pombe (strain 972 / ATCC 24843) OX=284812 GN=ats1 PE=2 SV=1	19.149	0	0	0
3.8	P79088	P79088	Protein transport protein sec61 subunit alpha	sec61	sp|P79088|SC61A_SCHPO Protein transport protein sec61 subunit alpha OS=Schizosaccharomyces pombe (strain 972 / ATCC 24843) OX=284812 GN=sec61 PE=2 SV=1	53.253	0	0	0
31.5	P87057	P87057	Non-histone chromosomal protein 6	nhp6	sp|P87057|NHP6_SCHPO Non-histone chromosomal protein 6 OS=Schizosaccharomyces pombe (strain 972 / ATCC 24843) OX=284812 GN=nhp6 PE=3 SV=1	12.361	0	0	0
7.6	P87111	P87111	Probable electron transfer flavoprotein-ubiquinone oxidoreductase, mitochondrial	SPAC20G8.04c	sp|P87111|ETFD_SCHPO Probable electron transfer flavoprotein-ubiquinone oxidoreductase, mitochondrial OS=Schizosaccharomyces pombe (strain 972 / ATCC 24843) OX=284812 GN=SPAC20G8.04c PE=3 SV=1	69.472	0	0	0
1.4	P87112	P87112	General negative regulator of transcription subunit 1	not1	sp|P87112|NOT1_SCHPO General negative regulator of transcription subunit 1 OS=Schizosaccharomyces pombe (strain 972 / ATCC 24843) OX=284812 GN=not1 PE=1 SV=1	237.13	0	0	0
11	P87113	P87113	C-8 sterol isomerase erg2	erg2	sp|P87113|ERG2_SCHPO C-8 sterol isomerase erg2 OS=Schizosaccharomyces pombe (strain 972 / ATCC 24843) OX=284812 GN=erg2 PE=3 SV=1	24.671	0	0	0
1.2	P87115	P87115	UPF0202 protein C20G8.09c	SPAC20G8.09c	sp|P87115|NAT10_SCHPO RNA cytidine acetyltransferase OS=Schizosaccharomyces pombe (strain 972 / ATCC 24843) OX=284812 GN=nat10 PE=1 SV=1	116.46	0	0	0
2.3	P87132	P87132	Uncharacterized protein C167.05		sp|P87132|YFK5_SCHPO Uncharacterized protein C167.05 OS=Schizosaccharomyces pombe (strain 972 / ATCC 24843) OX=284812 GN=SPAC167.05 PE=1 SV=2	65.947	0	0	0
0.7	P87152	P87152	Transcriptional activator spt7	spt7	sp|P87152|SPT7_SCHPO Transcriptional activator spt7 OS=Schizosaccharomyces pombe (strain 972 / ATCC 24843) OX=284812 GN=spt7 PE=1 SV=2	112.9	0	0	0
1.5	P87178	P87178	Uncharacterized protein C3D6.13c	SPBC3D6.13c	sp|P87178|YB1D_SCHPO Uncharacterized protein C3D6.13c OS=Schizosaccharomyces pombe (strain 972 / ATCC 24843) OX=284812 GN=SPBC3D6.13c PE=1 SV=1	81.236	0	0	0
6.6	P87242	P87242	HD domain-containing protein C4G3.17	SPCC4G3.17	sp|P87242|HDD1_SCHPO 5-deoxynucleotidase hdd1 OS=Schizosaccharomyces pombe (strain 972 / ATCC 24843) OX=284812 GN=hdd1 PE=3 SV=1	22.929	0	0	0
6.9	P87317	P87317	Uncharacterized protein C31F10.16	SPBC31F10.16	sp|P87317|YB2G_SCHPO Uncharacterized protein C31F10.16 OS=Schizosaccharomyces pombe (strain 972 / ATCC 24843) OX=284812 GN=SPBC31F10.16 PE=4 SV=2	74.094	0	0	0
4.1	Q01682	Q01682	Thiamine-repressible acid phosphatase pho4	pho4	sp|Q01682|PPA2_SCHPO Thiamine-repressible acid phosphatase pho4 OS=Schizosaccharomyces pombe (strain 972 / ATCC 24843) OX=284812 GN=pho4 PE=1 SV=1	52.118	0	0	0
2.4	Q02061	Q02061	DNA-directed RNA polymerase II subunit RPB2	rpb2	sp|Q02061|RPB2_SCHPO DNA-directed RNA polymerase II subunit RPB2 OS=Schizosaccharomyces pombe (strain 972 / ATCC 24843) OX=284812 GN=rpb2 PE=1 SV=2	137.85	0	0	0
4.7	Q02592	Q02592	Heavy metal tolerance protein	hmt1	sp|Q02592|HMT1_SCHPO Heavy metal tolerance protein OS=Schizosaccharomyces pombe (strain 972 / ATCC 24843) OX=284812 GN=hmt1 PE=2 SV=3	93.993	0	0	0
10.8	Q03392	Q03392	Proliferating cell nuclear antigen	pcn1	sp|Q03392|PCNA_SCHPO Proliferating cell nuclear antigen OS=Schizosaccharomyces pombe (strain 972 / ATCC 24843) OX=284812 GN=pcn1 PE=1 SV=1	28.969	0	0	0
29.4	Q06975	Q06975	H/ACA ribonucleoprotein complex subunit 1	gar1	sp|Q06975|GAR1_SCHPO H/ACA ribonucleoprotein complex subunit gar1 OS=Schizosaccharomyces pombe (strain 972 / ATCC 24843) OX=284812 GN=gar1 PE=2 SV=1	20.131	0	0	0
0.9	Q09140	Q09140	UDP-glucose:glycoprotein glucosyltransferase	gpt1	sp|Q09140|UGGG_SCHPO UDP-glucose:glycoprotein glucosyltransferase OS=Schizosaccharomyces pombe (strain 972 / ATCC 24843) OX=284812 GN=gpt1 PE=1 SV=2	165.47	0	0	0
7.9	Q09176	Q09176	Splicing factor U2AF 23 kDa subunit	SPAP8A3.06	sp|Q09176|U2AF1_SCHPO Splicing factor U2AF 23 kDa subunit OS=Schizosaccharomyces pombe (strain 972 / ATCC 24843) OX=284812 GN=SPAP8A3.06 PE=1 SV=2	25.03	0	0	0
12	Q09177	Q09177	DNA-directed RNA polymerases I and III subunit RPAC2	rpc19	sp|Q09177|RPAC2_SCHPO DNA-directed RNA polymerases I and III subunit RPAC2 OS=Schizosaccharomyces pombe (strain 972 / ATCC 24843) OX=284812 GN=rpc19 PE=1 SV=1	13.721	0	0	0
10.5	Q09191	Q09191	DNA-directed RNA polymerases I, II, and III subunit RPABC1	rpb5	sp|Q09191|RPAB1_SCHPO DNA-directed RNA polymerases I, II, and III subunit RPABC1 OS=Schizosaccharomyces pombe (strain 972 / ATCC 24843) OX=284812 GN=rpb5 PE=1 SV=1	23.915	0	0	0
25.6	Q09330	Q09330	mRNA export protein mlo3	mlo3	sp|Q09330|MLO3_SCHPO mRNA export protein mlo3 OS=Schizosaccharomyces pombe (strain 972 / ATCC 24843) OX=284812 GN=mlo3 PE=1 SV=1	21.791	0	0	0
3.9	Q09673	Q09673	Pantoate--beta-alanine ligase	pan6	sp|Q09673|PANC_SCHPO Pantoate--beta-alanine ligase OS=Schizosaccharomyces pombe (strain 972 / ATCC 24843) OX=284812 GN=pan6 PE=3 SV=1	31.876	0	0	0
11.7	Q09686	Q09686	Putative glutamine amidotransferase-like protein C13C5.04	SPAC13C5.04	sp|Q09686|YA14_SCHPO Putative glutamine amidotransferase-like protein C13C5.04 OS=Schizosaccharomyces pombe (strain 972 / ATCC 24843) OX=284812 GN=SPAC13C5.04 PE=4 SV=1	28.003	0	0	0
6.3	Q09711	Q09711	Calcium-binding protein NCS-1	ncs1	sp|Q09711|NCS1_SCHPO Calcium-binding protein NCS-1 OS=Schizosaccharomyces pombe (strain 972 / ATCC 24843) OX=284812 GN=ncs1 PE=1 SV=2	22.033	0	1	0
3.6	Q09715	Q09715	Transcriptional repressor tup11	tup11	sp|Q09715|TUP11_SCHPO Transcriptional repressor tup11 OS=Schizosaccharomyces pombe (strain 972 / ATCC 24843) OX=284812 GN=tup11 PE=1 SV=1	67.33	0	0	0
5.7	Q09722	Q09722	Eukaryotic translation initiation factor 3 subunit M	eif3m	sp|Q09722|EIF3M_SCHPO Eukaryotic translation initiation factor 3 subunit M OS=Schizosaccharomyces pombe (strain 972 / ATCC 24843) OX=284812 GN=eif3m PE=1 SV=2	45.085	0	0	0
10.6	Q09751	Q09751	Lactoylglutathione lyase	glo1	sp|Q09751|LGUL_SCHPO Lactoylglutathione lyase OS=Schizosaccharomyces pombe (strain 972 / ATCC 24843) OX=284812 GN=glo1 PE=1 SV=1	34.41	0	0	0
10.2	Q09783	Q09783	Mitochondrial import inner membrane translocase subunit tim8	tim8	sp|Q09783|TIM8_SCHPO Mitochondrial import inner membrane translocase subunit tim8 OS=Schizosaccharomyces pombe (strain 972 / ATCC 24843) OX=284812 GN=tim8 PE=3 SV=1	11.355	0	0	0
2.9	Q09787	Q09787	Uncharacterized protein C13G6.09	SPAC13G6.09	sp|Q09787|YA99_SCHPO Uncharacterized protein C13G6.09 OS=Schizosaccharomyces pombe (strain 972 / ATCC 24843) OX=284812 GN=SPAC13G6.09 PE=4 SV=1	31.089	0	0	0
6.7	Q09790	Q09790	Diphosphoinositol polyphosphate phosphohydrolase aps1	aps1	sp|Q09790|APS1_SCHPO Diphosphoinositol polyphosphate phosphohydrolase aps1 OS=Schizosaccharomyces pombe (strain 972 / ATCC 24843) OX=284812 GN=aps1 PE=1 SV=1	23.724	0	0	0
2.5	Q09805	Q09805	Vacuolar protein sorting-associated protein 45	vps45	sp|Q09805|VPS45_SCHPO Vacuolar protein sorting-associated protein 45 OS=Schizosaccharomyces pombe (strain 972 / ATCC 24843) OX=284812 GN=vps45 PE=3 SV=1	63.551	0	0	0
2.7	Q09818	Q09818	Putative general negative regulator of transcription C16C9.04c	SPAC16C9.04c	sp|Q09818|YAC4_SCHPO Putative general negative regulator of transcription C16C9.04c OS=Schizosaccharomyces pombe (strain 972 / ATCC 24843) OX=284812 GN=SPAC16C9.04c PE=3 SV=1	54.417	0	0	0
12.1	Q09845	Q09845	Glycerol-3-phosphate dehydrogenase [NAD(+)] 2	gpd2	sp|Q09845|GPD2_SCHPO Glycerol-3-phosphate dehydrogenase [NAD(+)] 2 OS=Schizosaccharomyces pombe (strain 972 / ATCC 24843) OX=284812 GN=gpd2 PE=1 SV=1	40.874	0	0	0
3.4	Q09850	Q09850	Putative endo-1,3(4)-beta-glucanase 2	eng2	sp|Q09850|ENG2_SCHPO Ascus wall endo-1,3(4)-beta-glucanase OS=Schizosaccharomyces pombe (strain 972 / ATCC 24843) OX=284812 GN=eng2 PE=1 SV=1	77.947	0	0	0
10.4	Q09869	Q09869	Transcription initiation factor TFIID subunit 9	taf9	sp|Q09869|TAF9_SCHPO Transcription initiation factor TFIID subunit 9 OS=Schizosaccharomyces pombe (strain 972 / ATCC 24843) OX=284812 GN=taf9 PE=1 SV=1	18.448	0	0	0
19.7	Q09871	Q09871	Uncharacterized protein C12G12.07c	SPAC12G12.07c	sp|Q09871|YAG7_SCHPO Uncharacterized protein C12G12.07c OS=Schizosaccharomyces pombe (strain 972 / ATCC 24843) OX=284812 GN=SPAC12G12.07c PE=4 SV=1	45.724	0	0	0
1.3	Q09879	Q09879	Probable ubiquitin carboxyl-terminal hydrolase 5	ubp5	sp|Q09879|UBP5_SCHPO Probable ubiquitin carboxyl-terminal hydrolase 5 OS=Schizosaccharomyces pombe (strain 972 / ATCC 24843) OX=284812 GN=ubp5 PE=3 SV=3	128.67	0	0	0
1.7	Q09891	Q09891	Putative phospholipid-transporting ATPase C24B11.12c	SPAC24B11.12c	sp|Q09891|ATCX_SCHPO Putative phospholipid-transporting ATPase C24B11.12c OS=Schizosaccharomyces pombe (strain 972 / ATCC 24843) OX=284812 GN=SPAC24B11.12c PE=3 SV=1	159.35	0	0	0
4.8	Q09898	Q09898	Serine/threonine-protein kinase sid2	sid2	sp|Q09898|SID2_SCHPO Serine/threonine-protein kinase sid2 OS=Schizosaccharomyces pombe (strain 972 / ATCC 24843) OX=284812 GN=sid2 PE=1 SV=1	70.491	0	0	0
1.1	Q09904	Q09904	Nucleoporin nup124	nup124	sp|Q09904|NU124_SCHPO Nucleoporin nup124 OS=Schizosaccharomyces pombe (strain 972 / ATCC 24843) OX=284812 GN=nup124 PE=1 SV=1	123.97	0	0	0
2.3	Q09910	Q09910	Uncharacterized protein C30D11.11	SPAC30D11.11	sp|Q09910|YAJB_SCHPO Uncharacterized protein C30D11.11 OS=Schizosaccharomyces pombe (strain 972 / ATCC 24843) OX=284812 GN=SPAC30D11.11 PE=4 SV=1	51.056	0	0	0
2.8	Q09911	Q09911	Uncharacterized protein C30D11.14c	SPAC30D11.14c	sp|Q09911|YAJE_SCHPO Uncharacterized protein C30D11.14c OS=Schizosaccharomyces pombe (strain 972 / ATCC 24843) OX=284812 GN=SPAC30D11.14c PE=4 SV=1	59.035	0	0	0
4.1	Q09913	Q09913	Probable allantoicase	SPAC1F7.09c	sp|Q09913|ALLC_SCHPO Probable allantoicase OS=Schizosaccharomyces pombe (strain 972 / ATCC 24843) OX=284812 GN=SPAC1F7.09c PE=3 SV=1	37.965	0	0	0
4	Q09916	Q09916	ATP-dependent RNA helicase has1	has1	sp|Q09916|HAS1_SCHPO ATP-dependent RNA helicase has1 OS=Schizosaccharomyces pombe (strain 972 / ATCC 24843) OX=284812 GN=has1 PE=1 SV=1	65.261	0	0	0
2.4	Q09924	Q09924	Probable translation initiation factor eIF-2B subunit delta	tif224	sp|Q09924|EI2BD_SCHPO Probable translation initiation factor eIF-2B subunit delta OS=Schizosaccharomyces pombe (strain 972 / ATCC 24843) OX=284812 GN=tif224 PE=1 SV=1	51.583	0	0	0
11.3	Q10060	Q10060	Uncharacterized protein C1F5.05c	SPAC1F5.05c	sp|Q10060|YAM5_SCHPO Uncharacterized protein C1F5.05c OS=Schizosaccharomyces pombe (strain 972 / ATCC 24843) OX=284812 GN=SPAC1F5.05c PE=4 SV=1	16.664	0	0	0
4.1	Q10061	Q10061	Heat shock protein 70 homolog lhs1	SPAC1F5.06	sp|Q10061|LHS1_SCHPO Heat shock protein 70 homolog lhs1 OS=Schizosaccharomyces pombe (strain 972 / ATCC 24843) OX=284812 GN=SPAC1F5.06 PE=3 SV=1	94.897	0	0	0
1	Q10068	Q10068	Uncharacterized protein C3H1.02c	SPAC3H1.02c	sp|Q10068|YAN2_SCHPO Uncharacterized protein C3H1.02c OS=Schizosaccharomyces pombe (strain 972 / ATCC 24843) OX=284812 GN=SPAC3H1.02c PE=4 SV=1	117.42	0	0	0
6.5	Q10071	Q10071	Probable CAAX prenyl protease 1	SPAC3H1.05	sp|Q10071|STE24_SCHPO Probable CAAX prenyl protease 1 OS=Schizosaccharomyces pombe (strain 972 / ATCC 24843) OX=284812 GN=SPAC3H1.05 PE=3 SV=1	54.001	0	0	0
3.3	Q10093	Q10093	Uncharacterized protein C11D3.14c	SPAC11D3.14c	sp|Q10093|YAOE_SCHPO Uncharacterized protein C11D3.14c OS=Schizosaccharomyces pombe (strain 972 / ATCC 24843) OX=284812 GN=SPAC11D3.14c PE=3 SV=1	138.78	0	0	0
0.9	Q10105	Q10105	Translational activator gcn1	gcn1	sp|Q10105|GCN1_SCHPO eIF-2-alpha kinase activator gcn1 OS=Schizosaccharomyces pombe (strain 972 / ATCC 24843) OX=284812 GN=gcn1 PE=3 SV=1	297.33	0	0	0
7.7	Q10143	Q10143	Probable prefoldin subunit 3	SPAC3H8.07c	sp|Q10143|PFD3_SCHPO Probable prefoldin subunit 3 OS=Schizosaccharomyces pombe (strain 972 / ATCC 24843) OX=284812 GN=SPAC3H8.07c PE=3 SV=1	19.445	0	0	0
9.5	Q10163	Q10163	Small nuclear ribonucleoprotein-associated protein B	smb1	sp|Q10163|RSMB_SCHPO Small nuclear ribonucleoprotein-associated protein B OS=Schizosaccharomyces pombe (strain 972 / ATCC 24843) OX=284812 GN=smb1 PE=1 SV=1	15.476	0	0	0
20.5	Q10166	Q10166	Hydrolase C26A3.11	SPAC26A3.11	sp|Q10166|YAUB_SCHPO Hydrolase C26A3.11 OS=Schizosaccharomyces pombe (strain 972 / ATCC 24843) OX=284812 GN=SPAC26A3.11 PE=3 SV=1	35.679	0	0	0
4.3	Q10168	Q10168	Nucleoporin nsp1	nsp1	sp|Q10168|NSP1_SCHPO Nucleoporin nsp1 OS=Schizosaccharomyces pombe (strain 972 / ATCC 24843) OX=284812 GN=nsp1 PE=1 SV=1	60.73	0	0	0
3.8	Q10172	Q10172	Actin cytoskeleton-regulatory complex protein pan1	pan1	sp|Q10172|PAN1_SCHPO Actin cytoskeleton-regulatory complex protein pan1 OS=Schizosaccharomyces pombe (strain 972 / ATCC 24843) OX=284812 GN=pan1 PE=1 SV=1	193.28	0	0	0
2.5	Q10173	Q10173	Kinetochore protein nuf2	nuf2	sp|Q10173|NUF2_SCHPO Kinetochore protein nuf2 OS=Schizosaccharomyces pombe (strain 972 / ATCC 24843) OX=284812 GN=nuf2 PE=1 SV=1	51.911	0	0	0
4.4	Q10175	Q10175	Probable peptidyl-prolyl cis-trans isomerase C27F1.06c	SPAC27F1.06c	sp|Q10175|FKBPH_SCHPO Probable peptidyl-prolyl cis-trans isomerase C27F1.06c OS=Schizosaccharomyces pombe (strain 972 / ATCC 24843) OX=284812 GN=SPAC27F1.06c PE=1 SV=1	40.54	0	0	0
2.9	Q10176	Q10176	Dolichyl-diphosphooligosaccharide--protein glycosyltransferase subunit 1	ost1	sp|Q10176|OST1_SCHPO Dolichyl-diphosphooligosaccharide--protein glycosyltransferase subunit 1 OS=Schizosaccharomyces pombe (strain 972 / ATCC 24843) OX=284812 GN=ost1 PE=3 SV=1	51.683	0	0	0
4.9	Q10184	Q10184	1-(5-phosphoribosyl)-5-[(5-phosphoribosylamino)methylideneamino] imidazole-4-carboxamide isomerase	SPAC3F10.09	sp|Q10184|HIS4_SCHPO 1-(5-phosphoribosyl)-5-[(5-phosphoribosylamino)methylideneamino] imidazole-4-carboxamide isomerase OS=Schizosaccharomyces pombe (strain 972 / ATCC 24843) OX=284812 GN=SPAC3F10.09 PE=3 SV=1	29.345	0	0	0
1.6	Q10187	Q10187	UBA domain-containing protein 6	ucp6	sp|Q10187|UCP6_SCHPO UBA domain-containing protein 6 OS=Schizosaccharomyces pombe (strain 972 / ATCC 24843) OX=284812 GN=ucp6 PE=1 SV=1	68.72	0	0	0
20	Q10189	Q10189	Mitosis-specific protein spo12	spo12	sp|Q10189|SPO12_SCHPO Mitosis-specific protein spo12 OS=Schizosaccharomyces pombe (strain 972 / ATCC 24843) OX=284812 GN=spo12 PE=4 SV=1	10.13	0	0	0
9.5	Q10193	Q10193	Pre-mRNA-splicing factor srp1	srp1	sp|Q10193|SRP1_SCHPO Pre-mRNA-splicing factor srp1 OS=Schizosaccharomyces pombe (strain 972 / ATCC 24843) OX=284812 GN=srp1 PE=1 SV=3	31.068	0	0	0
6.6	Q10202	Q10202	ATP-dependent RNA helicase dbp3	dbp3	sp|Q10202|DBP3_SCHPO ATP-dependent RNA helicase dbp3 OS=Schizosaccharomyces pombe (strain 972 / ATCC 24843) OX=284812 GN=dbp3 PE=3 SV=1	63.912	0	0	0
1.8	Q10206	Q10206	Diphthamide biosynthesis protein 2	dph2	sp|Q10206|DPH2_SCHPO 2-(3-amino-3-carboxypropyl)histidine synthase subunit 2 OS=Schizosaccharomyces pombe (strain 972 / ATCC 24843) OX=284812 GN=dph2 PE=3 SV=1	55.635	0	0	0
12.7	Q10215	Q10215	Putative thiosulfate sulfurtransferase, mitochondrial	SPAC4H3.07c	sp|Q10215|RDL_SCHPO Putative thiosulfate sulfurtransferase, mitochondrial OS=Schizosaccharomyces pombe (strain 972 / ATCC 24843) OX=284812 GN=SPAC4H3.07c PE=3 SV=2	16.185	0	0	0
10.7	Q10217	Q10217	Putative acyl carrier protein, mitochondrial	SPAC4H3.09	sp|Q10217|ACPM_SCHPO Putative acyl carrier protein, mitochondrial OS=Schizosaccharomyces pombe (strain 972 / ATCC 24843) OX=284812 GN=SPAC4H3.09 PE=3 SV=1	12.519	0	0	0
39.9	Q10265	Q10265	Probable heat shock protein ssa1	ssa1	sp|Q10265|HSP71_SCHPO Probable heat shock protein ssa1 OS=Schizosaccharomyces pombe (strain 972 / ATCC 24843) OX=284812 GN=ssa1 PE=1 SV=2	70.142	0	23	0
2.6	Q10276	Q10276	Putative choline kinase	SPAC13G7.12c	sp|Q10276|KICH_SCHPO Choline kinase OS=Schizosaccharomyces pombe (strain 972 / ATCC 24843) OX=284812 GN=SPAC13G7.12c PE=3 SV=1	52.535	0	0	0
6.9	Q10295	Q10295	Poly(A) polymerase pla1	pla1	sp|Q10295|PAP_SCHPO Poly(A) polymerase pla1 OS=Schizosaccharomyces pombe (strain 972 / ATCC 24843) OX=284812 GN=pla1 PE=1 SV=1	64.108	0	0	0
5.1	Q10311	Q10311	Ankyrin repeat-containing protein C6C3.08	SPAC6C3.08	sp|Q10311|YD58_SCHPO Ankyrin repeat-containing protein C6C3.08 OS=Schizosaccharomyces pombe (strain 972 / ATCC 24843) OX=284812 GN=SPAC6C3.08 PE=4 SV=1	25.93	0	0	0
5.9	Q10333	Q10333	Peroxisomal biogenesis factor 11	pex11	sp|Q10333|PEX11_SCHPO Peroxisomal biogenesis factor 11 OS=Schizosaccharomyces pombe (strain 972 / ATCC 24843) OX=284812 GN=pex11 PE=3 SV=2	26.478	0	0	0
7.3	Q10335	Q10335	Probable 26S proteasome regulatory subunit rpn7	rpn7	sp|Q10335|RPN7_SCHPO Probable 26S proteasome regulatory subunit rpn7 OS=Schizosaccharomyces pombe (strain 972 / ATCC 24843) OX=284812 GN=rpn7 PE=2 SV=1	46.68	0	0	0
10.7	Q10341	Q10341	Probable serine-O-acetyltransferase cys2	cys2	sp|Q10341|SST_SCHPO Serine O-succinyltransferase OS=Schizosaccharomyces pombe (strain 972 / ATCC 24843) OX=284812 GN=cys2 PE=1 SV=1	56.362	0	0	0
1.5	Q10361	Q10361	Electron transfer protein 1, mitochondrial	etp1	sp|Q10361|ETP1_SCHPO Electron transfer protein 1, mitochondrial OS=Schizosaccharomyces pombe (strain 972 / ATCC 24843) OX=284812 GN=etp1 PE=1 SV=2	68.583	0	0	0
3	Q10368	Q10368	Uncharacterized protein C22E12.18	SPAC22E12.18	sp|Q10368|YDBI_SCHPO Uncharacterized protein C22E12.18 OS=Schizosaccharomyces pombe (strain 972 / ATCC 24843) OX=284812 GN=SPAC22E12.18 PE=1 SV=1	38.445	0	0	0
2.7	Q10422	Q10422	Uncharacterized RNA-binding protein C25G10.01		sp|Q10422|YDC1_SCHPO Uncharacterized RNA-binding protein C25G10.01 OS=Schizosaccharomyces pombe (strain 972 / ATCC 24843) OX=284812 GN=SPAC25G10.01 PE=1 SV=1	33.564	0	0	0
24.2	Q10434	Q10434	F-actin-capping protein subunit alpha	acp1	sp|Q10434|CAPZA_SCHPO F-actin-capping protein subunit alpha OS=Schizosaccharomyces pombe (strain 972 / ATCC 24843) OX=284812 GN=acp1 PE=1 SV=1	29.808	0	0	0
4.7	Q10436	Q10436	Uncharacterized protein C12B10.02c	SPAC12B10.02c	sp|Q10436|YDE2_SCHPO Uncharacterized protein C12B10.02c OS=Schizosaccharomyces pombe (strain 972 / ATCC 24843) OX=284812 GN=SPAC12B10.02c PE=4 SV=1	26.934	0	0	0
10.1	Q10440	Q10440	Succinate dehydrogenase assembly factor 2, mitochondrial	emi5	sp|Q10440|SDHF2_SCHPO Succinate dehydrogenase assembly factor 2, mitochondrial OS=Schizosaccharomyces pombe (strain 972 / ATCC 24843) OX=284812 GN=emi5 PE=3 SV=1	16.764	0	0	0
2.4	Q10449	Q10449	Meiotically up-regulated gene 157 protein	mug157	sp|Q10449|MU157_SCHPO Meiotically up-regulated gene 157 protein OS=Schizosaccharomyces pombe (strain 972 / ATCC 24843) OX=284812 GN=mug157 PE=1 SV=1	57.153	0	0	0
17.9	Q10481	Q10481	Mitochondrial import inner membrane translocase subunit tim13	tim13	sp|Q10481|TIM13_SCHPO Mitochondrial import inner membrane translocase subunit tim13 OS=Schizosaccharomyces pombe (strain 972 / ATCC 24843) OX=284812 GN=tim13 PE=3 SV=1	10.742	0	0	0
3.9	Q10499	Q10499	Apoptosis-inducing factor 1	aif1	sp|Q10499|AIF1_SCHPO Apoptosis-inducing factor 1 OS=Schizosaccharomyces pombe (strain 972 / ATCC 24843) OX=284812 GN=aif1 PE=3 SV=3	66.565	0	0	0
4.3	Q10659	Q10659	Membrane glycoprotein spo14	spo14	sp|Q10659|SPO14_SCHPO Membrane glycoprotein spo14 OS=Schizosaccharomyces pombe (strain 972 / ATCC 24843) OX=284812 GN=spo14 PE=2 SV=1	45.077	0	0	0
1.8	Q12705	Q12705	Serine/threonine-protein phosphatase 2B catalytic subunit	ppb1	sp|Q12705|PP2B_SCHPO Serine/threonine-protein phosphatase 2B catalytic subunit OS=Schizosaccharomyces pombe (strain 972 / ATCC 24843) OX=284812 GN=ppb1 PE=3 SV=2	63.714	0	0	0
1.5	Q4LB35	Q4LB35	Folic acid synthesis protein fol1;Dihydroneopterin aldolase;2-amino-4-hydroxy-6-hydroxymethyldihydropteridine pyrophosphokinase;Dihydropteroate synthase	fol1	sp|Q4LB35|FOL1_SCHPO Folic acid synthesis protein fol1 OS=Schizosaccharomyces pombe (strain 972 / ATCC 24843) OX=284812 GN=fol1 PE=1 SV=2	81.925	0	0	0
19.3	Q8NIL3	Q8NIL3	Antisense-enhancing sequence 1	aes1	sp|Q8NIL3|AES1_SCHPO Antisense-enhancing sequence 1 OS=Schizosaccharomyces pombe (strain 972 / ATCC 24843) OX=284812 GN=aes1 PE=3 SV=1	32.228	0	0	0
7.8	Q8TFH3	Q8TFH3	Dolichyl-diphosphooligosaccharide--protein glycosyltransferase subunit 3	ost3	sp|Q8TFH3|OST3_SCHPO Dolichyl-diphosphooligosaccharide--protein glycosyltransferase subunit 3 OS=Schizosaccharomyces pombe (strain 972 / ATCC 24843) OX=284812 GN=ost3 PE=3 SV=1	34.983	0	0	0
5.6	Q92353	Q92353	Ubiquitin carboxyl-terminal hydrolase 6	ubp6	sp|Q92353|UBP6_SCHPO Ubiquitin carboxyl-terminal hydrolase 6 OS=Schizosaccharomyces pombe (strain 972 / ATCC 24843) OX=284812 GN=ubp6 PE=1 SV=2	52.316	0	0	0
15.7	Q92356	Q92356	Synaptobrevin homolog 1	syb1	sp|Q92356|SYB1_SCHPO Synaptobrevin homolog 1 OS=Schizosaccharomyces pombe (strain 972 / ATCC 24843) OX=284812 GN=syb1 PE=3 SV=1	13.469	0	0	0
5.8	Q92357	Q92357	Cell fusion protein cfr1	cfr1	sp|Q92357|CFR1_SCHPO Cell fusion protein cfr1 OS=Schizosaccharomyces pombe (strain 972 / ATCC 24843) OX=284812 GN=cfr1 PE=3 SV=1	67.23	0	0	0
4.3	Q92398	Q92398	Mitogen-activated protein kinase spm1	spm1	sp|Q92398|SPM1_SCHPO Mitogen-activated protein kinase spm1 OS=Schizosaccharomyces pombe (strain 972 / ATCC 24843) OX=284812 GN=spm1 PE=1 SV=1	48.261	0	1	0
5.3	Q96WW6	Q96WW6	Alpha-1,3/1,6-mannosyltransferase alg2	alg2	sp|Q96WW6|ALG2_SCHPO Alpha-1,3/1,6-mannosyltransferase alg2 OS=Schizosaccharomyces pombe (strain 972 / ATCC 24843) OX=284812 GN=alg2 PE=3 SV=2	57.166	0	0	0
7.7	Q9C0U6	Q9C0U6	Xylulose kinase	xks1	sp|Q9C0U6|XKS1_SCHPO Xylulose kinase OS=Schizosaccharomyces pombe (strain 972 / ATCC 24843) OX=284812 GN=xks1 PE=3 SV=1	61.682	0	0	0
5	Q9C0U7	Q9C0U7	Vacuolar protein sorting-associated protein vps5	vps5	sp|Q9C0U7|VPS5_SCHPO Vacuolar protein sorting-associated protein vps5 OS=Schizosaccharomyces pombe (strain 972 / ATCC 24843) OX=284812 GN=vps5 PE=1 SV=1	64.23	0	0	0
2.3	Q9C0U9	Q9C0U9	Uncharacterized transporter PB1C11.03	SPCPB1C11.03	sp|Q9C0U9|YQD3_SCHPO Uncharacterized transporter PB1C11.03 OS=Schizosaccharomyces pombe (strain 972 / ATCC 24843) OX=284812 GN=SPCPB1C11.03 PE=1 SV=1	64.328	0	0	0
5.3	Q9C0V4	Q9C0V4	Uncharacterized protein PB7E8.02	SPBPB7E8.02	sp|Q9C0V4|YOM2_SCHPO Uncharacterized protein PB7E8.02 OS=Schizosaccharomyces pombe (strain 972 / ATCC 24843) OX=284812 GN=SPBPB7E8.02 PE=4 SV=1	82.21	0	0	0
1	Q9C0X8	Q9C0X8	Putative ribosomal RNA-processing protein 12	SPAPB8E5.07c	sp|Q9C0X8|RRP12_SCHPO Putative ribosomal RNA-processing protein 12 OS=Schizosaccharomyces pombe (strain 972 / ATCC 24843) OX=284812 GN=rrp12 PE=3 SV=1	130.53	0	0	0
3.9	Q9C100	Q9C100	Dolichyl-phosphate-mannose--protein mannosyltransferase 2	ogm2	sp|Q9C100|PMT2_SCHPO Dolichyl-phosphate-mannose--protein mannosyltransferase 2 OS=Schizosaccharomyces pombe (strain 972 / ATCC 24843) OX=284812 GN=ogm2 PE=3 SV=1	85.036	0	0	0
7.9	Q9C1W3	Q9C1W3	Probable squalene monooxygenase	erg1	sp|Q9C1W3|ERG1_SCHPO Probable squalene monooxygenase OS=Schizosaccharomyces pombe (strain 972 / ATCC 24843) OX=284812 GN=erg1 PE=3 SV=1	50.338	0	0	0
2.5	Q9C1X2	Q9C1X2	Putative D-lactate dehydrogenase C713.03, mitochondrial	SPBC713.03	sp|Q9C1X2|YN53_SCHPO Putative D-lactate dehydrogenase C713.03, mitochondrial OS=Schizosaccharomyces pombe (strain 972 / ATCC 24843) OX=284812 GN=SPBC713.03 PE=3 SV=1	58.472	0	0	0
6.9	Q9HDX8	Q9HDX8	D-arabinono-1,4-lactone oxidase	alo1	sp|Q9HDX8|ALO_SCHPO D-arabinono-1,4-lactone oxidase OS=Schizosaccharomyces pombe (strain 972 / ATCC 24843) OX=284812 GN=alo1 PE=3 SV=1	52.027	0	0	0
26.7	Q9HDZ8	Q9HDZ8	Uncharacterized protein C589.06c	SPAC589.06c	sp|Q9HDZ8|YKP6_SCHPO Uncharacterized protein C589.06c OS=Schizosaccharomyces pombe (strain 972 / ATCC 24843) OX=284812 GN=SPAC589.06c PE=1 SV=1	21.742	0	0	0
3.5	Q9HFE5	Q9HFE5	AP-1 complex subunit mu-1	apm1	sp|Q9HFE5|AP1M1_SCHPO AP-1 complex subunit mu-1 OS=Schizosaccharomyces pombe (strain 972 / ATCC 24843) OX=284812 GN=apm1 PE=1 SV=1	48.955	0	0	0
7.7	Q9HGL3	Q9HGL3	Protein sum2	sum2	sp|Q9HGL3|SUM2_SCHPO Protein sum2 OS=Schizosaccharomyces pombe (strain 972 / ATCC 24843) OX=284812 GN=sum2 PE=1 SV=1	46.224	0	0	0
5.2	Q9HGL4	Q9HGL4	tRNA (adenine(58)-N(1))-methyltransferase non-catalytic subunit trm6	gcd10	sp|Q9HGL4|TRM6_SCHPO tRNA (adenine(58)-N(1))-methyltransferase non-catalytic subunit trm6 OS=Schizosaccharomyces pombe (strain 972 / ATCC 24843) OX=284812 GN=gcd10 PE=3 SV=1	53.2	0	0	0
3.7	Q9HGL6	Q9HGL6	Ribosome biogenesis protein brx1	brx1	sp|Q9HGL6|BRX1_SCHPO Ribosome biogenesis protein brx1 OS=Schizosaccharomyces pombe (strain 972 / ATCC 24843) OX=284812 GN=brx1 PE=3 SV=1	33.899	0	0	0
4.5	Q9HGN8	Q9HGN8	Survival factor 2	svf2	sp|Q9HGN8|SVF2_SCHPO Survival factor 2 OS=Schizosaccharomyces pombe (strain 972 / ATCC 24843) OX=284812 GN=svf2 PE=3 SV=1	40.333	0	0	0
4.1	Q9HGQ2	Q9HGQ2	Multisite-specific tRNA:(cytosine-C(5))-methyltransferase trm4a	trm4a	sp|Q9HGQ2|TRM4A_SCHPO Multisite-specific tRNA:(cytosine-C(5))-methyltransferase trm4a OS=Schizosaccharomyces pombe (strain 972 / ATCC 24843) OX=284812 GN=trm4a PE=1 SV=3	78.514	0	0	0
1	Q9P3U0	Q9P3U0	Probable ubiquitin carboxyl-terminal hydrolase 2	ubp2	sp|Q9P3U0|UBP2_SCHPO Probable ubiquitin carboxyl-terminal hydrolase 2 OS=Schizosaccharomyces pombe (strain 972 / ATCC 24843) OX=284812 GN=ubp2 PE=1 SV=1	130.3	0	0	0
2.5	Q9P4X3	Q9P4X3	Probable U3 small nucleolar RNA-associated protein 7	utp7	sp|Q9P4X3|UTP7_SCHPO Probable U3 small nucleolar RNA-associated protein 7 OS=Schizosaccharomyces pombe (strain 972 / ATCC 24843) OX=284812 GN=utp7 PE=3 SV=1	59.757	0	0	0
18.3	Q9P6I5	Q9P6I5	Guanylate kinase	SPBC1198.05	sp|Q9P6I5|KGUA_SCHPO Guanylate kinase OS=Schizosaccharomyces pombe (strain 972 / ATCC 24843) OX=284812 GN=SPBC1198.05 PE=3 SV=1	22.394	0	0	0
8.4	Q9P6J4	Q9P6J4	Uncharacterized protein C1683.06c	SPBC1683.06c	sp|Q9P6J4|YHD6_SCHPO Uncharacterized protein C1683.06c OS=Schizosaccharomyces pombe (strain 972 / ATCC 24843) OX=284812 GN=SPBC1683.06c PE=3 SV=1	33.667	0	0	0
5.4	Q9P6N8	Q9P6N8	ATP-dependent rRNA helicase rrp3	rrp3	sp|Q9P6N8|RRP3_SCHPO ATP-dependent rRNA helicase rrp3 OS=Schizosaccharomyces pombe (strain 972 / ATCC 24843) OX=284812 GN=rrp3 PE=3 SV=1	51.863	0	0	0
9	Q9P6P3	Q9P6P3	Serine/threonine-protein kinase ppk15	ppk15	sp|Q9P6P3|PPK15_SCHPO Serine/threonine-protein kinase ppk15 OS=Schizosaccharomyces pombe (strain 972 / ATCC 24843) OX=284812 GN=ppk15 PE=1 SV=1	61.49	0	0	0
16.4	Q9P6Q5	Q9P6Q5	Probable deoxyuridine 5-triphosphate nucleotidohydrolase	SPAC644.05c	sp|Q9P6Q5|DUT_SCHPO Probable deoxyuridine 5-triphosphate nucleotidohydrolase OS=Schizosaccharomyces pombe (strain 972 / ATCC 24843) OX=284812 GN=SPAC644.05c PE=3 SV=1	14.862	0	0	0
4	Q9P6R3	Q9P6R3	Uncharacterized protein C13E7.07	SPBC13E7.07	sp|Q9P6R3|YOH7_SCHPO Uncharacterized protein C13E7.07 OS=Schizosaccharomyces pombe (strain 972 / ATCC 24843) OX=284812 GN=SPBC13E7.07 PE=4 SV=1	31.058	0	0	0
4.1	Q9P768	Q9P768	Uncharacterized amino-acid permease P7G5.06	SPAP7G5.06	sp|Q9P768|YI26_SCHPO Uncharacterized amino-acid permease P7G5.06 OS=Schizosaccharomyces pombe (strain 972 / ATCC 24843) OX=284812 GN=SPAP7G5.06 PE=3 SV=1	64.081	0	0	0
6.8	Q9P777	Q9P777	Histidinol dehydrogenase	his2	sp|Q9P777|HISX_SCHPO Histidinol dehydrogenase OS=Schizosaccharomyces pombe (strain 972 / ATCC 24843) OX=284812 GN=his2 PE=3 SV=1	47.553	0	0	0
6.3	Q9P791	Q9P791	Uncharacterized Nudix hydrolase P35G2.12	SPBP35G2.12	sp|Q9P791|YN8C_SCHPO Uncharacterized Nudix hydrolase P35G2.12 OS=Schizosaccharomyces pombe (strain 972 / ATCC 24843) OX=284812 GN=SPBP35G2.12 PE=3 SV=1	23.032	0	0	0
3	Q9P7C1	Q9P7C1	Uncharacterized J domain-containing protein C2E1P5.03	SPAC2E1P5.03	sp|Q9P7C1|YKU3_SCHPO Uncharacterized J domain-containing protein C2E1P5.03 OS=Schizosaccharomyces pombe (strain 972 / ATCC 24843) OX=284812 GN=SPAC2E1P5.03 PE=3 SV=1	34.787	0	0	0
4	Q9P7E3	Q9P7E3	S-adenosylmethionine decarboxylase proenzyme;S-adenosylmethionine decarboxylase alpha chain;S-adenosylmethionine decarboxylase beta chain	spe2	sp|Q9P7E3|DCAM_SCHPO S-adenosylmethionine decarboxylase proenzyme OS=Schizosaccharomyces pombe (strain 972 / ATCC 24843) OX=284812 GN=spe2 PE=2 SV=1	42.712	0	0	0
7.6	Q9P7I0	Q9P7I0	Ankyrin repeat-containing protein C105.02c	SPAC105.02c	sp|Q9P7I0|YIT2_SCHPO Ankyrin repeat-containing protein C105.02c OS=Schizosaccharomyces pombe (strain 972 / ATCC 24843) OX=284812 GN=SPAC105.02c PE=4 SV=1	18.557	0	0	0
40.9	Q9P7J6	Q9P7J6	40S ribosomal protein S17-B	rps17b	sp|Q9P7J6|RS17B_SCHPO 40S ribosomal protein S17-B OS=Schizosaccharomyces pombe (strain 972 / ATCC 24843) OX=284812 GN=rps1702 PE=1 SV=1	15.534	0	5	0
8.3	Q9P7K0	Q9P7K0	Mitochondrial import inner membrane translocase subunit tim9	tim9	sp|Q9P7K0|TIM9_SCHPO Mitochondrial import inner membrane translocase subunit tim9 OS=Schizosaccharomyces pombe (strain 972 / ATCC 24843) OX=284812 GN=tim9 PE=3 SV=1	9.805	0	0	0
27.4	Q9P7K6	Q9P7K6	SDO1-like protein C21C3.19	SPBC21C3.19	sp|Q9P7K6|SDO1L_SCHPO SDO1-like protein C21C3.19 OS=Schizosaccharomyces pombe (strain 972 / ATCC 24843) OX=284812 GN=SPBC21C3.19 PE=3 SV=1	11.892	0	0	0
54.7	Q9P7M5	Q9P7M5	H/ACA ribonucleoprotein complex subunit 3	nop10	sp|Q9P7M5|NOP10_SCHPO H/ACA ribonucleoprotein complex subunit nop10 OS=Schizosaccharomyces pombe (strain 972 / ATCC 24843) OX=284812 GN=nop10 PE=3 SV=1	7.6578	0	0	0
3.3	Q9P7P0	Q9P7P0	Uncharacterized acyltransferase C1718.04	SPBC1718.04	sp|Q9P7P0|YOL4_SCHPO Uncharacterized acyltransferase C1718.04 OS=Schizosaccharomyces pombe (strain 972 / ATCC 24843) OX=284812 GN=SPBC1718.04 PE=1 SV=1	76.627	0	0	0
2.1	Q9P7S3	Q9P7S3	SWI/SNF and RSC complexes subunit ssr3	ssr3	sp|Q9P7S3|SSR3_SCHPO SWI/SNF and RSC complexes subunit ssr3 OS=Schizosaccharomyces pombe (strain 972 / ATCC 24843) OX=284812 GN=ssr3 PE=1 SV=1	49.759	0	0	0
0.6	Q9P7V2	Q9P7V2	ATP-binding cassette transporter abc4	abc4	sp|Q9P7V2|ABC4_SCHPO ATP-binding cassette transporter abc4 OS=Schizosaccharomyces pombe (strain 972 / ATCC 24843) OX=284812 GN=abc4 PE=3 SV=1	164.79	0	0	0
1.3	Q9P7V5	Q9P7V5	Protein transport protein sec72	sec72	sp|Q9P7V5|SEC7B_SCHPO Protein transport protein sec72 OS=Schizosaccharomyces pombe (strain 972 / ATCC 24843) OX=284812 GN=sec72 PE=1 SV=1	206.8	0	0	0
2.6	Q9P7V9	Q9P7V9	Probable ubiquitin carboxyl-terminal hydrolase 9	ubp9	sp|Q9P7V9|UBP9_SCHPO Probable ubiquitin carboxyl-terminal hydrolase 9 OS=Schizosaccharomyces pombe (strain 972 / ATCC 24843) OX=284812 GN=ubp9 PE=1 SV=1	66.788	0	0	0
1.5	Q9P7W7	Q9P7W7	Uncharacterized ARM-like repeat-containing protein C1703.03c	SPBC1703.03c	sp|Q9P7W7|YGQ3_SCHPO Uncharacterized ARM-like repeat-containing protein C1703.03c OS=Schizosaccharomyces pombe (strain 972 / ATCC 24843) OX=284812 GN=SPBC1703.03c PE=4 SV=1	74.81	0	0	0
3.5	Q9P7X8	Q9P7X8	Probable DNA-directed RNA polymerase I subunit RPA2	rpa2	sp|Q9P7X8|RPA2_SCHPO Probable DNA-directed RNA polymerase I subunit RPA2 OS=Schizosaccharomyces pombe (strain 972 / ATCC 24843) OX=284812 GN=rpa2 PE=1 SV=2	131.69	0	0	0
3	Q9UQW9	Q9UQW9	Ornithine decarboxylase	spe1	sp|Q9UQW9|DCOR_SCHPO Ornithine decarboxylase OS=Schizosaccharomyces pombe (strain 972 / ATCC 24843) OX=284812 GN=spe1 PE=2 SV=1	47.843	0	0	0
3.7	Q9URT9	Q9URT9	Protein kinase gsk31	gsk31	sp|Q9URT9|GSK31_SCHPO Protein kinase gsk31 OS=Schizosaccharomyces pombe (strain 972 / ATCC 24843) OX=284812 GN=gsk31 PE=1 SV=1	43.381	0	0	0
2.7	Q9URW7	Q9URW7	Vacuolar protein sorting-associated protein 17	vps17	sp|Q9URW7|VPS17_SCHPO Vacuolar protein sorting-associated protein 17 OS=Schizosaccharomyces pombe (strain 972 / ATCC 24843) OX=284812 GN=vps17 PE=3 SV=1	60.92	0	0	0
9.4	Q9URX2	Q9URX2	Uncharacterized protein C922.04	SPAC922.04	sp|Q9URX2|YLX4_SCHPO Uncharacterized protein C922.04 OS=Schizosaccharomyces pombe (strain 972 / ATCC 24843) OX=284812 GN=SPAC922.04 PE=3 SV=1	12.817	0	0	0
0.9	Q9URX8	Q9URX8	Probable nucleoporin C890.06	SPAC890.06	sp|Q9URX8|NG06_SCHPO Probable nucleoporin C890.06 OS=Schizosaccharomyces pombe (strain 972 / ATCC 24843) OX=284812 GN=SPAC890.06 PE=3 SV=3	147.63	0	0	0
6.1	Q9URY0	Q9URY0	Ribosome biogenesis protein ytm1	ytm1	sp|Q9URY0|YTM1_SCHPO Ribosome biogenesis protein ytm1 OS=Schizosaccharomyces pombe (strain 972 / ATCC 24843) OX=284812 GN=ytm1 PE=1 SV=1	48.334	0	0	0
2.7	Q9URZ7	Q9URZ7	Probable fructose-2,6-bisphosphatase C732.02c	SPAC732.02c	sp|Q9URZ7|YK72_SCHPO Probable fructose-2,6-bisphosphatase C732.02c OS=Schizosaccharomyces pombe (strain 972 / ATCC 24843) OX=284812 GN=SPAC732.02c PE=3 SV=1	46.947	0	0	0
7.5	Q9US06	Q9US06	RNA polymerase II-associated protein 1 homolog	SPAC664.03	sp|Q9US06|PAF1_SCHPO RNA polymerase II-associated protein 1 homolog OS=Schizosaccharomyces pombe (strain 972 / ATCC 24843) OX=284812 GN=SPAC664.03 PE=1 SV=2	51.189	0	0	0
3.4	Q9US13	Q9US13	Probable 26S proteasome regulatory subunit rpn9	rpn9	sp|Q9US13|RPN9_SCHPO Probable 26S proteasome regulatory subunit rpn9 OS=Schizosaccharomyces pombe (strain 972 / ATCC 24843) OX=284812 GN=rpn9 PE=3 SV=1	43.457	0	0	0
3	Q9US27	Q9US27	Putative lysophosphatidic acid:oleoyl-CoA acyltransferase	vps66	sp|Q9US27|LOA1_SCHPO Putative lysophosphatidic acid:oleoyl-CoA acyltransferase OS=Schizosaccharomyces pombe (strain 972 / ATCC 24843) OX=284812 GN=vps66 PE=3 SV=2	33.247	0	0	0
5.4	Q9USJ1	Q9USJ1	Probable 3-mercaptopyruvate sulfurtransferase	tum1	sp|Q9USJ1|THTM_SCHPO Probable 3-mercaptopyruvate sulfurtransferase OS=Schizosaccharomyces pombe (strain 972 / ATCC 24843) OX=284812 GN=tum1 PE=1 SV=2	32.8	0	0	0
13.8	Q9USJ5	Q9USJ5	Uroporphyrinogen decarboxylase	hem12	sp|Q9USJ5|DCUP_SCHPO Uroporphyrinogen decarboxylase OS=Schizosaccharomyces pombe (strain 972 / ATCC 24843) OX=284812 GN=hem12 PE=3 SV=2	40.113	0	0	0
4.4	Q9USK7	Q9USK7	Uncharacterized protein C4B3.18	SPCC4B3.18	sp|Q9USK7|YJ2I_SCHPO Uncharacterized protein C4B3.18 OS=Schizosaccharomyces pombe (strain 972 / ATCC 24843) OX=284812 GN=SPCC4B3.18 PE=3 SV=1	36.242	0	0	0
1.7	Q9USN2	Q9USN2	UPF0652 protein C16A11.03c	SPCC16A11.03c	sp|Q9USN2|YCL3_SCHPO UPF0652 protein C16A11.03c OS=Schizosaccharomyces pombe (strain 972 / ATCC 24843) OX=284812 GN=SPCC16A11.03c PE=3 SV=1	53.677	0	0	0
2.4	Q9USN8	Q9USN8	Ribosome quality control complex subunit 2	mtr1	sp|Q9USN8|RQC2_SCHPO Ribosome quality control complex subunit 2 OS=Schizosaccharomyces pombe (strain 972 / ATCC 24843) OX=284812 GN=mtr1 PE=1 SV=2	114.24	0	0	0
3.2	Q9USP0	Q9USP0	Translation initiation factor eIF-2B subunit alpha	tif221	sp|Q9USP0|EI2BA_SCHPO Translation initiation factor eIF-2B subunit alpha OS=Schizosaccharomyces pombe (strain 972 / ATCC 24843) OX=284812 GN=tif221 PE=1 SV=1	37.773	0	0	0
7.6	Q9USQ9	Q9USQ9	Probable proteasome subunit beta type-7	SPBC577.10	sp|Q9USQ9|PSB7_SCHPO Probable proteasome subunit beta type-7 OS=Schizosaccharomyces pombe (strain 972 / ATCC 24843) OX=284812 GN=SPBC577.10 PE=3 SV=1	29.22	0	0	0
7	Q9USR5	Q9USR5	Uncharacterized THOC5 family protein	SPBC577.04	sp|Q9USR5|THOC5_SCHPO Uncharacterized THOC5 family protein OS=Schizosaccharomyces pombe (strain 972 / ATCC 24843) OX=284812 GN=SPBC577.04 PE=3 SV=1	23.497	0	1	0
2.1	Q9USS2	Q9USS2	Serine/threonine-protein kinase ppk29	ppk29	sp|Q9USS2|PPK29_SCHPO Serine/threonine-protein kinase ppk29 OS=Schizosaccharomyces pombe (strain 972 / ATCC 24843) OX=284812 GN=ppk29 PE=1 SV=1	96.125	0	0	0
6.9	Q9USS6	Q9USS6	Probable acid phosphatase SPBC4.06	SPBC4.06	sp|Q9USS6|PPA4_SCHPO Probable acid phosphatase SPBC4.06 OS=Schizosaccharomyces pombe (strain 972 / ATCC 24843) OX=284812 GN=SPBC4.06 PE=3 SV=1	51.975	0	0	0
1.8	Q9USS7	Q9USS7	Uncharacterized protein C4.03c	SPBC4.03c	sp|Q9USS7|YNB3_SCHPO Uncharacterized protein C4.03c OS=Schizosaccharomyces pombe (strain 972 / ATCC 24843) OX=284812 GN=SPBC4.03c PE=2 SV=1	98.068	0	0	0
12.4	Q9USS8	Q9USS8	Uncharacterized protein C4.02c	SPBC4.02c	sp|Q9USS8|YNB2_SCHPO Uncharacterized protein C4.02c OS=Schizosaccharomyces pombe (strain 972 / ATCC 24843) OX=284812 GN=SPBC4.02c PE=1 SV=2	50.01	0	0	0
4.8	Q9USU5	Q9USU5	1,3-beta-glucanosyltransferase gas2	gas2	sp|Q9USU5|GAS2_SCHPO 1,3-beta-glucanosyltransferase gas2 OS=Schizosaccharomyces pombe (strain 972 / ATCC 24843) OX=284812 GN=gas2 PE=2 SV=1	50.614	0	0	0
8.9	Q9USV4	Q9USV4	mRNA export protein 33	mep33	sp|Q9USV4|MEP33_SCHPO mRNA export protein 33 OS=Schizosaccharomyces pombe (strain 972 / ATCC 24843) OX=284812 GN=mep33 PE=2 SV=1	33.281	0	0	0
9	Q9USW1	Q9USW1	Uncharacterized protein C21B10.03c	SPBC21B10.03c	sp|Q9USW1|ATH1_SCHPO Ataxin-2 homolog OS=Schizosaccharomyces pombe (strain 972 / ATCC 24843) OX=284812 GN=ath1 PE=1 SV=1	85.523	0	0	0
1.6	Q9USZ1	Q9USZ1	Elongation factor G, mitochondrial	mef1	sp|Q9USZ1|EFGM_SCHPO Elongation factor G, mitochondrial OS=Schizosaccharomyces pombe (strain 972 / ATCC 24843) OX=284812 GN=mef1 PE=3 SV=2	86.324	0	0	0
2.7	Q9UT05	Q9UT05	Tripeptidyl-peptidase 2 homolog	tpp2	sp|Q9UT05|TPP2_SCHPO Tripeptidyl-peptidase 2 homolog OS=Schizosaccharomyces pombe (strain 972 / ATCC 24843) OX=284812 GN=tpp2 PE=1 SV=1	142.92	0	0	0
3.5	Q9UT27	Q9UT27	Pyruvyl transferase 1	pvg1	sp|Q9UT27|PVG1_SCHPO Pyruvyl transferase 1 OS=Schizosaccharomyces pombe (strain 972 / ATCC 24843) OX=284812 GN=pvg1 PE=1 SV=1	44.871	0	0	0
5.9	Q9UT29	Q9UT29	Uncharacterized protein C8F11.08c	SPAC8F11.08c	sp|Q9UT29|YKGC_SCHPO Uncharacterized protein C8F11.08c OS=Schizosaccharomyces pombe (strain 972 / ATCC 24843) OX=284812 GN=SPAC8F11.08c PE=4 SV=1	41.754	0	0	0
3.5	Q9UT32	Q9UT32	Putative ribosome biogenesis protein C8F11.04	SPAC8F11.04	sp|Q9UT32|RL1DB_SCHPO Putative ribosome biogenesis protein C8F11.04 OS=Schizosaccharomyces pombe (strain 972 / ATCC 24843) OX=284812 GN=SPAC8F11.04 PE=3 SV=1	41.357	0	0	0
13.4	Q9UT81	Q9UT81	UBX domain-containing protein 3	ubx3	sp|Q9UT81|UBX3_SCHPO UBX domain-containing protein 3 OS=Schizosaccharomyces pombe (strain 972 / ATCC 24843) OX=284812 GN=ubx3 PE=1 SV=1	44.896	0	0	0
3.1	Q9UT88	Q9UT88	Probable phosphomevalonate kinase	erg8	sp|Q9UT88|ERG8_SCHPO Probable phosphomevalonate kinase OS=Schizosaccharomyces pombe (strain 972 / ATCC 24843) OX=284812 GN=erg8 PE=3 SV=1	47.322	0	0	0
7.8	Q9UTA8	Q9UTA8	Uncharacterized methyltransferase-like C25B8.10	SPAC25B8.10	sp|Q9UTA8|YL8A_SCHPO Uncharacterized methyltransferase-like C25B8.10 OS=Schizosaccharomyces pombe (strain 972 / ATCC 24843) OX=284812 GN=SPAC25B8.10 PE=3 SV=1	29.376	0	0	0
6.8	Q9UTA9	Q9UTA9	Uncharacterized methyltransferase C25B8.09	SPAC25B8.09	sp|Q9UTA9|YL89_SCHPO Uncharacterized methyltransferase C25B8.09 OS=Schizosaccharomyces pombe (strain 972 / ATCC 24843) OX=284812 GN=SPAC25B8.09 PE=3 SV=1	28.468	0	0	0
8.9	Q9UTD4	Q9UTD4	Probable prefoldin subunit 4	SPAC227.05	sp|Q9UTD4|PFD4_SCHPO Probable prefoldin subunit 4 OS=Schizosaccharomyces pombe (strain 972 / ATCC 24843) OX=284812 GN=SPAC227.05 PE=3 SV=1	14.189	0	0	0
15	Q9UTE0	Q9UTE0	Protein sey1	sey1	sp|Q9UTE0|SEY1_SCHPO Protein sey1 OS=Schizosaccharomyces pombe (strain 972 / ATCC 24843) OX=284812 GN=sey1 PE=1 SV=1	87.509	0	0	0
2.5	Q9UTE1	Q9UTE1	Probable 6-phosphofructo-2-kinase C222.13c	SPAC222.13c	sp|Q9UTE1|YFMD_SCHPO Probable 6-phosphofructo-2-kinase C222.13c OS=Schizosaccharomyces pombe (strain 972 / ATCC 24843) OX=284812 GN=SPAC222.13c PE=3 SV=1	68.639	0	0	0
16	Q9UTE2	Q9UTE2	Probable oxygen-dependent coproporphyrinogen-III oxidase	hem13	sp|Q9UTE2|HEM6_SCHPO Probable oxygen-dependent coproporphyrinogen-III oxidase OS=Schizosaccharomyces pombe (strain 972 / ATCC 24843) OX=284812 GN=hem13 PE=3 SV=1	36.244	0	0	0
7.4	Q9UTE3	Q9UTE3	Rpb7-binding protein seb1	seb1	sp|Q9UTE3|SEB1_SCHPO Rpb7-binding protein seb1 OS=Schizosaccharomyces pombe (strain 972 / ATCC 24843) OX=284812 GN=seb1 PE=1 SV=3	66.439	0	0	0
17.1	Q9UTK3	Q9UTK3	Probable nicotinate phosphoribosyltransferase	SPAC1486.06	sp|Q9UTK3|NPT1_SCHPO Probable nicotinate phosphoribosyltransferase OS=Schizosaccharomyces pombe (strain 972 / ATCC 24843) OX=284812 GN=SPAC1486.06 PE=3 SV=1	46.694	0	0	0
1.9	Q9UTN2	Q9UTN2	Uncharacterized protein C139.01c		sp|Q9UTN2|MKT1_SCHPO Post-transcriptional regulator mkt1 OS=Schizosaccharomyces pombe (strain 972 / ATCC 24843) OX=284812 GN=mkt1 PE=1 SV=2	90.152	0	0	0
36.8	Q9UTP0	Q9UTP0	60S ribosomal protein L30-2	rpl30b	sp|Q9UTP0|RL30B_SCHPO 60S ribosomal protein L30-2 OS=Schizosaccharomyces pombe (strain 972 / ATCC 24843) OX=284812 GN=rpl3002 PE=3 SV=1	12.242	0	0	0
10.8	Q9UU79	Q9UU79	Ribosome biogenesis protein nsa2	nsa2	sp|Q9UU79|NSA2_SCHPO Ribosome biogenesis protein nsa2 OS=Schizosaccharomyces pombe (strain 972 / ATCC 24843) OX=284812 GN=nsa2 PE=1 SV=1	29.705	0	0	0
6.1	Q9UU82	Q9UU82	Probable sterol O-acyltransferase 2	are2	sp|Q9UU82|AREH2_SCHPO Probable sterol O-acyltransferase 2 OS=Schizosaccharomyces pombe (strain 972 / ATCC 24843) OX=284812 GN=are2 PE=1 SV=1	55.156	0	0	0
4.7	Q9UUA4	Q9UUA4	Translocation protein sec66	sec66	sp|Q9UUA4|SEC66_SCHPO Translocation protein sec66 OS=Schizosaccharomyces pombe (strain 972 / ATCC 24843) OX=284812 GN=sec66 PE=1 SV=1	22.135	0	0	0
6.1	Q9UUA9	Q9UUA9	Pre-rRNA-processing protein tsr2	tsr2	sp|Q9UUA9|TSR2_SCHPO Pre-rRNA-processing protein tsr2 OS=Schizosaccharomyces pombe (strain 972 / ATCC 24843) OX=284812 GN=tsr2 PE=3 SV=1	20.508	0	0	0
11.3	Q9UUC2	Q9UUC2	CRAL-TRIO domain-containing protein C365.01	SPBC365.01	sp|Q9UUC2|YGR1_SCHPO CRAL-TRIO domain-containing protein C365.01 OS=Schizosaccharomyces pombe (strain 972 / ATCC 24843) OX=284812 GN=SPBC365.01 PE=2 SV=1	41.015	0	0	0
19.6	Q9UUC6	Q9UUC6	Small nuclear ribonucleoprotein Sm D3	smd3	sp|Q9UUC6|SMD3_SCHPO Small nuclear ribonucleoprotein Sm D3 OS=Schizosaccharomyces pombe (strain 972 / ATCC 24843) OX=284812 GN=smd3 PE=1 SV=1	11.033	0	0	0
6	Q9UUE2	Q9UUE2	Protein csx2	csx2	sp|Q9UUE2|CSX2_SCHPO Protein csx2 OS=Schizosaccharomyces pombe (strain 972 / ATCC 24843) OX=284812 GN=csx2 PE=1 SV=1	99.081	0	0	0
7.4	Q9UUF1	Q9UUF1	Deoxyribonuclease Tat-D		sp|Q9UUF1|YNF8_SCHPO Deoxyribonuclease Tat-D OS=Schizosaccharomyces pombe (strain 972 / ATCC 24843) OX=284812 GN=pi038 PE=3 SV=1	35.388	0	0	0
5.4	Q9UUG1	Q9UUG1	Ribosome production factor 2 homolog	SPAC926.08c	sp|Q9UUG1|RPF2_SCHPO Ribosome production factor 2 homolog OS=Schizosaccharomyces pombe (strain 972 / ATCC 24843) OX=284812 GN=SPAC926.08c PE=1 SV=1	36.071	0	0	0
2	Q9UUG8	Q9UUG8	Transcriptional repressor tup12	tup12	sp|Q9UUG8|TUP12_SCHPO Transcriptional repressor tup12 OS=Schizosaccharomyces pombe (strain 972 / ATCC 24843) OX=284812 GN=tup12 PE=1 SV=2	65.56	0	0	0
14.4	Q9UUJ1	Q9UUJ1	Actin-related protein 2	arp2	sp|Q9UUJ1|ARP2_SCHPO Actin-related protein 2 OS=Schizosaccharomyces pombe (strain 972 / ATCC 24843) OX=284812 GN=arp2 PE=1 SV=1	44.23	0	0	0
6.3	Q9UUK0	Q9UUK0	Pyridoxamine 5-phosphate oxidase C1952.08c homolog	SPAC1952.08c	sp|Q9UUK0|PDXH_SCHPO Pyridoxamine 5-phosphate oxidase C1952.08c homolog OS=Schizosaccharomyces pombe (strain 972 / ATCC 24843) OX=284812 GN=SPAC1952.08c PE=3 SV=1	21.653	0	0	0
5.7	Q9Y7J4	Q9Y7J4	Actin-related protein 2/3 complex subunit 3	arc3	sp|Q9Y7J4|ARPC3_SCHPO Actin-related protein 2/3 complex subunit 3 OS=Schizosaccharomyces pombe (strain 972 / ATCC 24843) OX=284812 GN=arc3 PE=1 SV=1	19.844	0	0	0
16.2	Q9Y7K0	Q9Y7K0	UPF0659 protein C216.03	SPBC216.03	sp|Q9Y7K0|YGL3_SCHPO UPF0659 protein C216.03 OS=Schizosaccharomyces pombe (strain 972 / ATCC 24843) OX=284812 GN=SPBC216.03 PE=3 SV=1	27.209	0	0	0
6.4	Q9Y7K4	Q9Y7K4	Uncharacterized protein C2A9.02	SPBC2A9.02	sp|Q9Y7K4|YGI2_SCHPO Uncharacterized protein C2A9.02 OS=Schizosaccharomyces pombe (strain 972 / ATCC 24843) OX=284812 GN=SPBC2A9.02 PE=3 SV=1	31.516	0	0	0
5.4	Q9Y7K8	Q9Y7K8	Dehydrodolichyl diphosphate syntase complex subunit nus1	nus1	sp|Q9Y7K8|UPPS_SCHPO Dehydrodolichyl diphosphate synthase complex subunit nus1 OS=Schizosaccharomyces pombe (strain 972 / ATCC 24843) OX=284812 GN=nus1 PE=1 SV=1	29.862	0	0	0
6.5	Q9Y7L0	Q9Y7L0	Protein transport protein sec22	sec22	sp|Q9Y7L0|SEC22_SCHPO Protein transport protein sec22 OS=Schizosaccharomyces pombe (strain 972 / ATCC 24843) OX=284812 GN=sec22 PE=3 SV=2	24.902	0	0	0
2.6	Q9Y7M8	Q9Y7M8	Probable RNA exonuclease C9B6.11c	SPBC9B6.11c	sp|Q9Y7M8|YNTB_SCHPO Probable RNA exonuclease C9B6.11c OS=Schizosaccharomyces pombe (strain 972 / ATCC 24843) OX=284812 GN=SPBC9B6.11c PE=3 SV=1	57.65	0	0	0
3.7	Q9Y7N4	Q9Y7N4	D-amino-acid oxidase	dao1	sp|Q9Y7N4|OXDA_SCHPO D-amino-acid oxidase OS=Schizosaccharomyces pombe (strain 972 / ATCC 24843) OX=284812 GN=dao1 PE=3 SV=1	38.714	0	0	0
5.2	Q9Y7N9	Q9Y7N9	PX domain-containing protein C1450.12	SPCC1450.12	sp|Q9Y7N9|YCKC_SCHPO PX domain-containing protein C1450.12 OS=Schizosaccharomyces pombe (strain 972 / ATCC 24843) OX=284812 GN=SPCC1450.12 PE=1 SV=1	96.106	0	0	0
5.8	Q9Y7P0	Q9Y7P0	Riboflavin synthase	rib5	sp|Q9Y7P0|RISA_SCHPO Riboflavin synthase OS=Schizosaccharomyces pombe (strain 972 / ATCC 24843) OX=284812 GN=rib5 PE=1 SV=1	22.861	0	0	0
8.7	Q9Y7P2	Q9Y7P2	Uncharacterized protein C1450.15	SPCC1450.15	sp|Q9Y7P2|YCKF_SCHPO Uncharacterized protein C1450.15 OS=Schizosaccharomyces pombe (strain 972 / ATCC 24843) OX=284812 GN=SPCC1450.15 PE=3 SV=2	55.643	0	0	0
5.3	Q9Y7T1	Q9Y7T1	Uncharacterized protein C63.05	SPCC63.05	sp|Q9Y7T1|YCJ5_SCHPO Uncharacterized protein C63.05 OS=Schizosaccharomyces pombe (strain 972 / ATCC 24843) OX=284812 GN=SPCC63.05 PE=3 SV=1	38.205	0	0	0
1.9	Q9Y7X6	Q9Y7X6	Stress response protein ish1	ish1	sp|Q9Y7X6|ISH1_SCHPO Stress response protein ish1 OS=Schizosaccharomyces pombe (strain 972 / ATCC 24843) OX=284812 GN=ish1 PE=1 SV=1	75.698	0	0	0
8.2	Q9Y7Y3	Q9Y7Y3	Uncharacterized RNA-binding protein C365.04c	SPBC365.04c	sp|Q9Y7Y3|YGR4_SCHPO Uncharacterized RNA-binding protein C365.04c OS=Schizosaccharomyces pombe (strain 972 / ATCC 24843) OX=284812 GN=SPBC365.04c PE=4 SV=1	26.809	0	0	0
5.2	Q9Y7Y6	Q9Y7Y6	Uncharacterized protein C342.04	SPBC342.04	sp|Q9Y7Y6|RP13A_SCHPO Proteasomal ubiquitin receptor ADRM1 homolog rpn1301 OS=Schizosaccharomyces pombe (strain 972 / ATCC 24843) OX=284812 GN=rpn1301 PE=1 SV=1	31.82	0	0	0

## Sheet: 0518_RAW_Data_iBAQ_60min
Only identified by site	Reverse	Potential contaminant	Intensity 2_2_Slot1-37_1_3847	Peptides 2_2_Slot1-37_1_3847	iBAQ 2_2_Slot1-37_1_3847	Intensity 3_2_Slot1-38_1_3850	Peptides 3_2_Slot1-38_1_3850	iBAQ 3_2_Slot1-38_1_3850	Intensity 4_2_Slot1-39_1_3859	Peptides 4_2_Slot1-39_1_3859	iBAQ 4_2_Slot1-39_1_3859	Intensity 5_2_Slot1-40_1_3854	Peptides 5_2_Slot1-40_1_3854	iBAQ 5_2_Slot1-40_1_3854	Sequence coverage [%]	Protein IDs	Majority protein IDs	Protein names	Gene names	Fasta headers	Mol. weight [kDa]	id
#!{Type}C	C	C	N	N	N	N	N	N	N	N	N	N	N	N	N	T	T	T	T	T	T	T
			0	3	0	0	0	0	1785200	13	178520	193250	11	19325	41	A0A059PIR9	A0A059PIR9			tr|A0A059PIR9|A0A059PIR9_AEQVI Yellow fluorescent protein (Fragment) OS=Aequorea victoria OX=6100 GN=yfp PE=1 SV=1	28.13	0
			0	0	0	0	0	0	295510	12	6424.1	235680	12	5123.5	26.6	A9ZLL8	A9ZLL8	Protein lsd90	lsd90	sp|A9ZLL8|LSD90_SCHPO Protein lsd90 OS=Schizosaccharomyces pombe (strain 972 / ATCC 24843) OX=284812 GN=lsd90 PE=1 SV=1	82.323	1
			0	0	0	0	0	0	36266	3	2266.6	306170	6	19136	26.8	B5BP46	B5BP46	Putative glutathione S-transferase C1183.02	SPBC460.02c	sp|B5BP46|YP52_SCHPO Putative glutathione S-transferase C460.02c OS=Schizosaccharomyces pombe (strain 972 / ATCC 24843) OX=284812 GN=SPBC460.02c PE=3 SV=1	25.717	2
			18090	1	6029.9	0	0	0	0	0	0	0	0	0	20.4	G2TRP7	G2TRP7	Mitochondrial import receptor subunit tom5	tom5	sp|G2TRP7|TOM5_SCHPO Mitochondrial import receptor subunit tom5 OS=Schizosaccharomyces pombe (strain 972 / ATCC 24843) OX=284812 GN=tom5 PE=3 SV=1	5.3623	28
			0	0	0	0	0	0	24724	2	4944.8	28504	1	5700.8	35.8	G2TRQ0	G2TRQ0	Uncharacterized protein tam13	tam13	sp|G2TRQ0|TAM13_SCHPO Uncharacterized protein tam13 OS=Schizosaccharomyces pombe (strain 972 / ATCC 24843) OX=284812 GN=tam13 PE=2 SV=1	10.171	29
			0	0	0	0	0	0	28378	1	7094.5	16391	1	4097.7	19.4	G2TRQ6	G2TRQ6	Uncharacterized protein tam11	tam11	sp|G2TRQ6|TAM11_SCHPO Uncharacterized protein tam11 OS=Schizosaccharomyces pombe (strain 972 / ATCC 24843) OX=284812 GN=tam11 PE=1 SV=1	6.9346	30
			0	0	0	0	0	0	0	0	0	36167	3	1033.4	4.1	O00084	O00084	Urease	ure1	sp|O00084|UREA_SCHPO Urease OS=Schizosaccharomyces pombe (strain 972 / ATCC 24843) OX=284812 GN=ure1 PE=1 SV=1	91.181	31
			0	0	0	0	0	0	6997.5	2	233.25	290290	11	9676.5	32.5	O00087	O00087	Dihydrolipoyl dehydrogenase, mitochondrial	dld1	sp|O00087|DLDH_SCHPO Dihydrolipoyl dehydrogenase, mitochondrial OS=Schizosaccharomyces pombe (strain 972 / ATCC 24843) OX=284812 GN=dld1 PE=2 SV=2	54.731	32
			0	0	0	0	0	0	333910	9	11925	992730	15	35454	42.2	O00091	O00091	Glucose-6-phosphate 1-dehydrogenase	zwf1	sp|O00091|G6PD_SCHPO Glucose-6-phosphate 1-dehydrogenase OS=Schizosaccharomyces pombe (strain 972 / ATCC 24843) OX=284812 GN=zwf1 PE=3 SV=2	57.204	33
			0	0	0	0	0	0	0	0	0	11936	1	702.1	2.6	O13310	O13310	Serine/threonine-protein kinase orb6	orb6	sp|O13310|ORB6_SCHPO Serine/threonine-protein kinase orb6 OS=Schizosaccharomyces pombe (strain 972 / ATCC 24843) OX=284812 GN=orb6 PE=1 SV=1	54.691	34
			96330	2	4587.1	0	0	0	1188600	11	56599	2675900	13	127420	51.3	O13326	O13326	O-acetylhomoserine (thiol)-lyase	SPBC428.11	sp|O13326|CYSD_SCHPO Homocysteine synthase OS=Schizosaccharomyces pombe (strain 972 / ATCC 24843) OX=284812 GN=met17 PE=1 SV=1	46.408	35
			0	0	0	0	0	0	601300	18	15824	1728000	21	45474	47.3	O13370	O13370	ATP-dependent RNA helicase ded1	ded1	sp|O13370|DED1_SCHPO ATP-dependent RNA helicase ded1 OS=Schizosaccharomyces pombe (strain 972 / ATCC 24843) OX=284812 GN=ded1 PE=1 SV=1	69.758	36
			0	0	0	0	0	0	422390	4	60342	2056400	8	293770	45.6	O13614	O13614	40S ribosomal protein S10-B	rps10b	sp|O13614|RS10B_SCHPO 40S ribosomal protein S10-B OS=Schizosaccharomyces pombe (strain 972 / ATCC 24843) OX=284812 GN=rps1002 PE=3 SV=1	16.443	37
			0	0	0	0	0	0	0	0	0	27691	2	1025.6	4.5	O13621	O13621	Uncharacterized protein C691.05c		sp|O13621|YNG5_SCHPO Uncharacterized protein C691.05c OS=Schizosaccharomyces pombe (strain 972 / ATCC 24843) OX=284812 GN=pi030 PE=4 SV=1	76.67	38
			0	0	0	0	0	0	0	0	0	2954.3	1	101.87	2.1	O13622	O13622	ATP-dependent RNA helicase mss116, mitochondrial	mss116	sp|O13622|MS116_SCHPO ATP-dependent RNA helicase mss116, mitochondrial OS=Schizosaccharomyces pombe (strain 972 / ATCC 24843) OX=284812 GN=mss116 PE=3 SV=1	59.449	39
			0	0	0	0	0	0	24084	2	1204.2	75887	5	3794.4	14.9	O13633	O13633	Uncharacterized J domain-containing protein C17A3.05c		sp|O13633|YNF5_SCHPO Uncharacterized J domain-containing protein C17A3.05c OS=Schizosaccharomyces pombe (strain 972 / ATCC 24843) OX=284812 GN=pi041 PE=1 SV=1	46.399	40
			0	0	0	0	0	0	42300	5	595.77	409720	15	5770.7	18.6	O13637	O13637	Protein transport protein sec31	sec31	sp|O13637|SEC31_SCHPO Protein transport protein sec31 OS=Schizosaccharomyces pombe (strain 972 / ATCC 24843) OX=284812 GN=sec31 PE=1 SV=1	132.5	41
			111870	6	5593.6	0	0	0	3913000	21	195650	7634600	24	381730	51.3	O13639	O13639	Adenosylhomocysteinase		sp|O13639|SAHH_SCHPO Adenosylhomocysteinase OS=Schizosaccharomyces pombe (strain 972 / ATCC 24843) OX=284812 GN=pi047 PE=3 SV=1	47.383	42
			0	0	0	0	0	0	0	0	0	3227.2	1	140.31	3.2	O13642	O13642	Lipoyl synthase, mitochondrial	lip5	sp|O13642|LIPA_SCHPO Lipoyl synthase, mitochondrial OS=Schizosaccharomyces pombe (strain 972 / ATCC 24843) OX=284812 GN=lip5 PE=3 SV=2	41.69	43
			0	0	0	0	0	0	36671	3	1666.9	93128	5	4233.1	14	O13648	O13648	Ribosomal protein arginine N-methyltransferase rmt3	rmt3	sp|O13648|ANM3_SCHPO Ribosomal protein arginine N-methyltransferase rmt3 OS=Schizosaccharomyces pombe (strain 972 / ATCC 24843) OX=284812 GN=rmt3 PE=1 SV=3	61.76	44
			0	0	0	0	0	0	1294300	26	25885	2952400	39	59048	42.1	O13651	O13651	Isoleucine--tRNA ligase, cytoplasmic	irs1	sp|O13651|SYIC_SCHPO Isoleucine--tRNA ligase, cytoplasmic OS=Schizosaccharomyces pombe (strain 972 / ATCC 24843) OX=284812 GN=irs1 PE=3 SV=1	122.91	45
			0	0	0	0	0	0	6249	1	367.59	32615	1	1918.5	5.2	O13656	O13656	Probable mitochondrial import receptor subunit tom40	tom40	sp|O13656|TOM40_SCHPO Probable mitochondrial import receptor subunit tom40 OS=Schizosaccharomyces pombe (strain 972 / ATCC 24843) OX=284812 GN=tom40 PE=3 SV=3	37.552	46
			0	0	0	0	0	0	337340	8	8031.9	1449800	7	34518	14.9	O13665	O13665	Factor arrest protein 11	far11	sp|O13665|FAR11_SCHPO Factor arrest protein 11 OS=Schizosaccharomyces pombe (strain 972 / ATCC 24843) OX=284812 GN=far11 PE=1 SV=1	95.092	47
			0	0	0	0	0	0	0	0	0	4863.1	1	405.26	4.6	O13666	O13666	C-5 sterol desaturase erg32	erg32	sp|O13666|ERG32_SCHPO Delta(7)-sterol 5(6)-desaturase erg32 OS=Schizosaccharomyces pombe (strain 972 / ATCC 24843) OX=284812 GN=erg32 PE=3 SV=1	39.063	48
			268360	7	15786	0	0	0	1903600	13	111980	5154500	16	303210	69.1	O13672	O13672	60S ribosomal protein L8	rpl8	sp|O13672|RL8_SCHPO 60S ribosomal protein L8 OS=Schizosaccharomyces pombe (strain 972 / ATCC 24843) OX=284812 GN=rpl8 PE=1 SV=3	28.606	49
			0	0	0	0	0	0	3797.5	1	421.95	17852	1	1983.5	7.4	O13685	O13685	Ubiquitin-conjugating enzyme E2 13	ubc13	sp|O13685|UBC13_SCHPO Ubiquitin-conjugating enzyme E2 13 OS=Schizosaccharomyces pombe (strain 972 / ATCC 24843) OX=284812 GN=ubc13 PE=1 SV=1	16.855	50
			22237	2	2470.7	0	0	0	13735	2	1526.1	82832	4	9203.5	26.9	O13687	O13687	V-type proton ATPase subunit E	vma4	sp|O13687|VATE_SCHPO V-type proton ATPase subunit E OS=Schizosaccharomyces pombe (strain 972 / ATCC 24843) OX=284812 GN=vma4 PE=3 SV=1	25.741	51
			6509.5	1	500.73	0	0	0	0	0	0	0	0	0	2.7	O13692	O13692	1,3-beta-glucanosyltransferase gas5	gas5	sp|O13692|GAS5_SCHPO 1,3-beta-glucanosyltransferase gas5 OS=Schizosaccharomyces pombe (strain 972 / ATCC 24843) OX=284812 GN=gas5 PE=1 SV=1	53.692	52
			0	0	0	0	0	0	37123	2	1856.2	141210	4	7060.4	18.5	O13696	O13696	Isocitrate dehydrogenase [NAD] subunit 1, mitochondrial	idh1	sp|O13696|IDH1_SCHPO Isocitrate dehydrogenase [NAD] subunit 1, mitochondrial OS=Schizosaccharomyces pombe (strain 972 / ATCC 24843) OX=284812 GN=idh1 PE=1 SV=1	38.758	53
			0	0	0	0	0	0	217530	1	4834	0	0	0	1.1	O13705	O13705	Exocyst complex component sec10	sec10	sp|O13705|SEC10_SCHPO Exocyst complex component sec10 OS=Schizosaccharomyces pombe (strain 972 / ATCC 24843) OX=284812 GN=sec10 PE=1 SV=2	92.515	54
			0	0	0	0	0	0	99499	7	2426.8	520080	11	12685	23.3	O13718	O13718	Vacuolar transporter chaperone 2	vtc2	sp|O13718|VTC2_SCHPO Vacuolar transporter chaperone 2 OS=Schizosaccharomyces pombe (strain 972 / ATCC 24843) OX=284812 GN=vtc2 PE=1 SV=1	85.444	55
			0	0	0	0	0	0	0	0	0	64752	4	2815.3	14.4	O13724	O13724	Zinc finger protein zpr1	zpr1	sp|O13724|ZPR1_SCHPO Zinc finger protein zpr1 OS=Schizosaccharomyces pombe (strain 972 / ATCC 24843) OX=284812 GN=zpr1 PE=3 SV=1	51.376	56
			0	0	0	0	0	0	0	0	0	3052.7	1	95.397	1.6	O13742	O13742	V-type proton ATPase subunit a	vph1	sp|O13742|VPH1_SCHPO V-type proton ATPase subunit a OS=Schizosaccharomyces pombe (strain 972 / ATCC 24843) OX=284812 GN=vph1 PE=3 SV=2	94.158	57
			0	0	0	0	0	0	8143.9	1	508.99	38912	2	2432	7.9	O13750	O13750	Probable succinyl-CoA ligase [ADP-forming] subunit alpha, mitochondrial	SPAC16E8.17c	sp|O13750|SUCA_SCHPO Succinate--CoA ligase [ADP-forming] subunit alpha, mitochondrial OS=Schizosaccharomyces pombe (strain 972 / ATCC 24843) OX=284812 GN=SPAC16E8.17c PE=3 SV=1	34.706	58
			0	0	0	0	0	0	3864.3	1	351.3	57930	1	5266.4	5.2	O13752	O13752	Uncharacterized TLC domain-containing protein C17A2.02c	SPAC17A2.02c	sp|O13752|YF22_SCHPO Uncharacterized TLC domain-containing protein C17A2.02c OS=Schizosaccharomyces pombe (strain 972 / ATCC 24843) OX=284812 GN=SPAC17A2.02c PE=4 SV=1	33.042	59
			0	0	0	0	0	0	0	0	0	73254	4	4069.7	10.2	O13753	O13753	V-type proton ATPase subunit d	vma6	sp|O13753|VA0D_SCHPO V-type proton ATPase subunit d OS=Schizosaccharomyces pombe (strain 972 / ATCC 24843) OX=284812 GN=vma6 PE=3 SV=1	39.323	60
			0	0	0	0	0	0	6415.5	1	237.61	39354	4	1457.5	14.4	O13755	O13755	Fumarate reductase	osm1	sp|O13755|OSM1_SCHPO Fumarate reductase OS=Schizosaccharomyces pombe (strain 972 / ATCC 24843) OX=284812 GN=osm1 PE=3 SV=1	55.483	61
			0	0	0	0	0	0	31974	2	2131.6	34757	3	2317.1	10.3	O13771	O13771	Uncharacterized protein C17A5.09c	SPAC17A5.09c	sp|O13771|YE99_SCHPO Uncharacterized protein C17A5.09c OS=Schizosaccharomyces pombe (strain 972 / ATCC 24843) OX=284812 GN=SPAC17A5.09c PE=1 SV=1	34.978	62
			0	0	0	0	0	0	22481	1	1729.3	62631	3	4817.8	19.6	O13774	O13774	GTP cyclohydrolase 1	SPAC17A5.13	sp|O13774|GCH1_SCHPO GTP cyclohydrolase 1 OS=Schizosaccharomyces pombe (strain 972 / ATCC 24843) OX=284812 GN=SPAC17A5.13 PE=1 SV=1	26.492	63
			0	0	0	0	0	0	544720	11	13286	1154100	21	28148	44.1	O13775	O13775	Probable glutamate--tRNA ligase, cytoplasmic	gus1	sp|O13775|SYEC_SCHPO Probable glutamate--tRNA ligase, cytoplasmic OS=Schizosaccharomyces pombe (strain 972 / ATCC 24843) OX=284812 GN=gus1 PE=1 SV=1	80.749	64
			0	0	0	0	0	0	5337.7	1	232.07	3986.8	1	173.34	1.5	O13779	O13779	Putative metal ion transporter C17A12.14		sp|O13779|YF2E_SCHPO Putative metal ion transporter C17A12.14 OS=Schizosaccharomyces pombe (strain 972 / ATCC 24843) OX=284812 GN=SPAC17A2.14 PE=1 SV=4	71.197	65
			0	1	0	0	0	0	27146	4	4524.3	265840	4	44306	20.9	O13784	O13784	40S ribosomal protein S24-A	rps24a	sp|O13784|RS24A_SCHPO 40S ribosomal protein S24-A OS=Schizosaccharomyces pombe (strain 972 / ATCC 24843) OX=284812 GN=rps2401 PE=3 SV=3	15.47	66
			0	0	0	0	0	0	0	0	0	2556.7	1	58.108	2	O13790	O13790	Cullin-1	cul1	sp|O13790|CUL1_SCHPO Cullin-1 OS=Schizosaccharomyces pombe (strain 972 / ATCC 24843) OX=284812 GN=cul1 PE=1 SV=1	89.425	67
			0	0	0	0	0	0	128040	6	7113.3	577510	11	32084	38.2	O13792	O13792	ATP-dependent RNA helicase uap56	uap56	sp|O13792|SUB2_SCHPO ATP-dependent RNA helicase uap56 OS=Schizosaccharomyces pombe (strain 972 / ATCC 24843) OX=284812 GN=uap56 PE=1 SV=3	49.231	68
			0	0	0	0	0	0	0	0	0	5025.8	1	167.53	1.8	O13796	O13796	Ribosome quality control complex subunit 1	rqc1	sp|O13796|RCQ1_SCHPO Ribosome quality control complex subunit 1 OS=Schizosaccharomyces pombe (strain 972 / ATCC 24843) OX=284812 GN=rqc1 PE=1 SV=2	75.014	69
			0	0	0	0	0	0	86875	5	5429.7	258580	6	16162	31.9	O13797	O13797	Small glutamine-rich tetratricopeptide repeat-containing protein 2	sgt2	sp|O13797|SGT2_SCHPO Small glutamine-rich tetratricopeptide repeat-containing protein 2 OS=Schizosaccharomyces pombe (strain 972 / ATCC 24843) OX=284812 GN=sgt2 PE=3 SV=1	34.001	70
			0	0	0	0	0	0	13980	1	699.02	17705	1	885.26	3.1	O13801	O13801	Uncharacterized RNA-binding protein C17H9.04c	SPAC17H9.04c	sp|O13801|DRI1_SCHPO RNA-binding protein involved in heterochromatin assembly dri1 OS=Schizosaccharomyces pombe (strain 972 / ATCC 24843) OX=284812 GN=dri1 PE=1 SV=1	66.396	71
			0	0	0	0	0	0	0	0	0	5272.9	2	405.61	12.6	O13802	O13802	Probable rRNA-processing protein ebp2	ebp2	sp|O13802|EBP2_SCHPO Probable rRNA-processing protein ebp2 OS=Schizosaccharomyces pombe (strain 972 / ATCC 24843) OX=284812 GN=ebp2 PE=1 SV=1	37.818	72
			0	0	0	0	0	0	17180	1	2147.5	41963	1	5245.4	7.8	O13808	O13808	Actin-depolymerizing factor gmf1	gmf1	sp|O13808|GMF1_SCHPO Actin-depolymerizing factor gmf1 OS=Schizosaccharomyces pombe (strain 972 / ATCC 24843) OX=284812 GN=gmf1 PE=3 SV=1	16.281	73
			4725.3	1	315.02	0	0	0	16291	1	1086	30725	1	2048.3	9	O13809	O13809	Uncharacterized FAD-binding protein C17H9.12c	SPAC17H9.12c	sp|O13809|YE0C_SCHPO Uncharacterized FAD-binding protein C17H9.12c OS=Schizosaccharomyces pombe (strain 972 / ATCC 24843) OX=284812 GN=SPAC17H9.12c PE=3 SV=1	29.375	74
			37220	1	1959	0	0	0	30665	2	1613.9	59635	2	3138.7	9.7	O13811	O13811	Protein disulfide-isomerase C17H9.14c	SPAC17H9.14c	sp|O13811|PDI2_SCHPO Protein disulfide-isomerase C17H9.14c OS=Schizosaccharomyces pombe (strain 972 / ATCC 24843) OX=284812 GN=SPAC17H9.14c PE=3 SV=1	40.691	75
			0	0	0	0	0	0	60277	3	1944.4	754140	15	24327	30.4	O13820	O13820	Cytochrome P450 61	erg5	sp|O13820|ERG5_SCHPO Cytochrome P450 61 OS=Schizosaccharomyces pombe (strain 972 / ATCC 24843) OX=284812 GN=erg5 PE=1 SV=3	62.27	76
			0	0	0	0	0	0	454890	12	13379	1143200	20	33624	43.8	O13831	O13831	Tryptophan synthase	trp2	sp|O13831|TRP_SCHPO Tryptophan synthase OS=Schizosaccharomyces pombe (strain 972 / ATCC 24843) OX=284812 GN=trp2 PE=2 SV=1	75.436	77
			1487600	1	36284	0	0	0	5345800	1	130380	4301900	1	104920	2.2	O13839	O13839	G2-specific protein kinase fin1	fin1	sp|O13839|FIN1_SCHPO G2-specific protein kinase fin1 OS=Schizosaccharomyces pombe (strain 972 / ATCC 24843) OX=284812 GN=fin1 PE=3 SV=1	82.688	78
			0	0	0	0	0	0	0	0	0	11454	1	572.72	2.5	O13842	O13842	Chitin deacetylase 1	cda1	sp|O13842|CDA1_SCHPO Putative polysaccharide deacetylase OS=Schizosaccharomyces pombe (strain 972 / ATCC 24843) OX=284812 GN=cda1 PE=1 SV=1	36.206	79
			0	0	0	0	0	0	12145	1	674.69	46877	2	2604.3	7.2	O13844	O13844	Uncharacterized mitochondrial carrier C19G12.05	SPAC19G12.05	sp|O13844|YFG5_SCHPO Uncharacterized mitochondrial carrier C19G12.05 OS=Schizosaccharomyces pombe (strain 972 / ATCC 24843) OX=284812 GN=SPAC19G12.05 PE=3 SV=1	31.573	80
			0	0	0	0	0	0	108540	2	7752.6	335100	6	23936	18.4	O13846	O13846	Ceramide very long chain fatty acid hydroxylase-like protein C19G12.08	SPAC19G12.08	sp|O13846|SCS7_SCHPO Ceramide very long chain fatty acid hydroxylase scs7 OS=Schizosaccharomyces pombe (strain 972 / ATCC 24843) OX=284812 GN=scs7 PE=3 SV=1	40.229	81
			33218	2	1845.4	0	0	0	135870	7	7548.3	344330	10	19129	38	O13848	O13848	NAD/NADP-dependent indole-3-acetaldehyde reductase	SPAC19G12.09	sp|O13848|I3ACR_SCHPO NAD/NADP-dependent indole-3-acetaldehyde reductase OS=Schizosaccharomyces pombe (strain 972 / ATCC 24843) OX=284812 GN=SPAC19G12.09 PE=1 SV=1	31.569	82
			0	0	0	0	0	0	0	0	0	19336	1	585.95	0.9	O13849	O13849	Carboxypeptidase Y	cpy1	sp|O13849|CBPY_SCHPO Carboxypeptidase Y OS=Schizosaccharomyces pombe (strain 972 / ATCC 24843) OX=284812 GN=cpy1 PE=1 SV=1	114.24	83
			0	0	0	0	0	0	0	0	0	6906.9	1	191.86	1.3	O13853	O13853	Phosphatidylinositol 4-phosphate 5-kinase its3	its3	sp|O13853|ITS3_SCHPO Phosphatidylinositol 4-phosphate 5-kinase its3 OS=Schizosaccharomyces pombe (strain 972 / ATCC 24843) OX=284812 GN=its3 PE=1 SV=3	83.747	84
			0	0	0	0	0	0	0	0	0	4594.8	1	218.8	2	O13857;O13857-2	O13857;O13857-2	Putative lysophospholipase C1A6.03c	SPAC1A6.03c	sp|O13857|PLB2_SCHPO Putative lysophospholipase SPAC1A6.03c OS=Schizosaccharomyces pombe (strain 972 / ATCC 24843) OX=284812 GN=SPAC1A6.03c PE=3 SV=4;sp|O13857-2|PLB2_SCHPO Isoform 2 of Putative lysophospholipase SPAC1A6.03c OS=Schizosaccharomyces pombe (s	73.041	85
			0	0	0	0	0	0	0	0	0	40458	3	1444.9	6.6	O13861	O13861	tRNA threonylcarbamoyladenosine dehydratase		sp|O13861|TCD_SCHPO tRNA threonylcarbamoyladenosine dehydratase OS=Schizosaccharomyces pombe (strain 972 / ATCC 24843) OX=284812 GN=SPAC1A6.10 PE=3 SV=1	54.299	86
			0	0	0	0	0	0	0	0	0	6939.9	1	289.16	1.4	O13864	O13864	Importin subunit beta-1	kap95	sp|O13864|IMB1_SCHPO Importin subunit beta-1 OS=Schizosaccharomyces pombe (strain 972 / ATCC 24843) OX=284812 GN=kap95 PE=3 SV=1	94.746	87
			0	0	0	0	0	0	0	0	0	0	1	0	1.9	O13865	O13865	PAB-dependent poly(A)-specific ribonuclease subunit pan3-like	SPAC1B1.04c	sp|O13865|PAN3L_SCHPO PAB-dependent poly(A)-specific ribonuclease subunit pan3-like OS=Schizosaccharomyces pombe (strain 972 / ATCC 24843) OX=284812 GN=SPAC1B1.04c PE=1 SV=2	76.045	88
			0	0	0	0	0	0	21078	1	1916.2	92249	2	8386.3	10.5	O13867	O13867	Uracil phosphoribosyltransferase 1	SPAC1B3.01c	sp|O13867|UPP1_SCHPO Uracil phosphoribosyltransferase 1 OS=Schizosaccharomyces pombe (strain 972 / ATCC 24843) OX=284812 GN=SPAC1B3.01c PE=3 SV=1	24.466	89
			0	0	0	0	0	0	10703	1	713.55	29150	3	1943.4	15.8	O13871	O13871	Uncharacterized methyltransferase C1B3.06c	SPAC1B3.06c	sp|O13871|YE16_SCHPO Uncharacterized methyltransferase C1B3.06c OS=Schizosaccharomyces pombe (strain 972 / ATCC 24843) OX=284812 GN=SPAC1B3.06c PE=3 SV=1	31.773	90
			0	0	0	0	0	0	0	0	0	10951	1	3650.4	15.5	O13877	O13877	DNA-directed RNA polymerases I, II, and III subunit RPABC5	rpb10	sp|O13877|RPAB5_SCHPO DNA-directed RNA polymerases I, II, and III subunit RPABC5 OS=Schizosaccharomyces pombe (strain 972 / ATCC 24843) OX=284812 GN=rpb10 PE=1 SV=2	8.2757	91
			0	0	0	0	0	0	0	0	0	54248	2	2855.2	3	O13880	O13880	Vitamin H transporter 1	vht1	sp|O13880|VHT1_SCHPO Vitamin H transporter 1 OS=Schizosaccharomyces pombe (strain 972 / ATCC 24843) OX=284812 GN=vht1 PE=2 SV=1	62.821	92
			0	0	0	0	0	0	0	0	0	2914.3	1	54.987	1.5	O13892	O13892	Uncharacterized protein C20G4.08		sp|O13892|YE38_SCHPO Uncharacterized protein C20G4.08 OS=Schizosaccharomyces pombe (strain 972 / ATCC 24843) OX=284812 GN=SPAC20G4.08 PE=1 SV=2	119.23	93
			0	0	0	0	0	0	0	0	0	15757	1	437.68	1.5	O13898	O13898	Dolichyl-phosphate-mannose--protein mannosyltransferase 1	ogm1	sp|O13898|PMT1_SCHPO Dolichyl-phosphate-mannose--protein mannosyltransferase 1 OS=Schizosaccharomyces pombe (strain 972 / ATCC 24843) OX=284812 GN=ogm1 PE=1 SV=1	101.33	94
			0	0	0	0	0	0	132530	1	4141.6	6882.7	1	215.08	3.9	O13899	O13899	Uncharacterized CDP-alcohol phosphatidyltransferase class-I family protein C22A12.08c	SPAC22A12.08c	sp|O13899|YF38_SCHPO Uncharacterized CDP-alcohol phosphatidyltransferase class-I family protein C22A12.08c OS=Schizosaccharomyces pombe (strain 972 / ATCC 24843) OX=284812 GN=SPAC22A12.08c PE=3 SV=1	63.879	95
			0	0	0	0	0	0	99135	4	2915.7	282790	9	8317.3	23.6	O13902	O13902	Dihydroxyacetone kinase 1	dak1	sp|O13902|DAK1_SCHPO Dihydroxyacetone kinase 1 OS=Schizosaccharomyces pombe (strain 972 / ATCC 24843) OX=284812 GN=dak1 PE=3 SV=1	62.316	96
			23110	2	1155.5	0	0	0	851260	16	42563	1626500	16	81323	48.2	O13907	O13907	Probable ATP-citrate synthase subunit 2	SPAC22A12.16	sp|O13907|ACL2_SCHPO Probable ATP-citrate synthase subunit 2 OS=Schizosaccharomyces pombe (strain 972 / ATCC 24843) OX=284812 GN=SPAC22A12.16 PE=1 SV=1	53.942	97
			0	0	0	0	0	0	428660	16	7793.9	916050	22	16656	38.4	O13914	O13914	Alanine--tRNA ligase	ala1	sp|O13914|SYA_SCHPO Alanine--tRNA ligase OS=Schizosaccharomyces pombe (strain 972 / ATCC 24843) OX=284812 GN=ala1 PE=1 SV=1	107.38	98
			0	0	0	0	0	0	230340	5	25593	320110	7	35568	39.3	O13917	O13917	Hypoxanthine-guanine phosphoribosyltransferase	hpt1	sp|O13917|HPRT_SCHPO Hypoxanthine-guanine phosphoribosyltransferase OS=Schizosaccharomyces pombe (strain 972 / ATCC 24843) OX=284812 GN=hpt1 PE=3 SV=1	23.572	99
			0	0	0	0	0	0	0	0	0	21217	3	816.04	8.5	O13920	O13920	LETM1 domain-containing protein mdm28, mitochondrial	mdm28	sp|O13920|MDM28_SCHPO LETM1 domain-containing protein mdm28, mitochondrial OS=Schizosaccharomyces pombe (strain 972 / ATCC 24843) OX=284812 GN=mdm28 PE=2 SV=3	55.723	100
			0	0	0	0	0	0	162220	10	5069.5	393680	13	12302	31.1	O13923	O13923	Coronin-like protein crn1	crn1	sp|O13923|CORO_SCHPO Coronin-like protein crn1 OS=Schizosaccharomyces pombe (strain 972 / ATCC 24843) OX=284812 GN=crn1 PE=1 SV=1	67.015	101
			0	0	0	0	0	0	0	0	0	0	1	0	9	O13927	O13927	Twin horsetail protein 2	tht2	sp|O13927|THT2_SCHPO Twin horsetail protein 2 OS=Schizosaccharomyces pombe (strain 972 / ATCC 24843) OX=284812 GN=tht2 PE=1 SV=1	23.511	102
			0	0	0	0	0	0	23602	2	1815.6	28575	2	2198.1	16.6	O13928	O13928	GTP-binding protein rho3	rho3	sp|O13928|RHO3_SCHPO GTP-binding protein rho3 OS=Schizosaccharomyces pombe (strain 972 / ATCC 24843) OX=284812 GN=rho3 PE=1 SV=2	22.501	103
			0	0	0	0	0	0	0	0	0	24650	1	3521.4	9.9	O13929	O13929	Uncharacterized protein C23C4.09c	SPAC23C4.09c	sp|O13929|YF69_SCHPO Uncharacterized protein C23C4.09c OS=Schizosaccharomyces pombe (strain 972 / ATCC 24843) OX=284812 GN=SPAC23C4.09c PE=3 SV=1	15.042	104
			0	0	0	0	0	0	0	0	0	6413.3	1	337.54	2.6	O13933	O13933	Chitobiosyldiphosphodolichol beta-mannosyltransferase	alg1	sp|O13933|ALG1_SCHPO Chitobiosyldiphosphodolichol beta-mannosyltransferase OS=Schizosaccharomyces pombe (strain 972 / ATCC 24843) OX=284812 GN=alg1 PE=3 SV=2	48.726	105
			0	0	0	0	0	0	0	0	0	32299	3	807.47	6.7	O13935	O13935	Multisite-specific tRNA:(cytosine-C(5))-methyltransferase trm4b	trm4b	sp|O13935|TRM4B_SCHPO Multisite-specific tRNA:(cytosine-C(5))-methyltransferase trm4b OS=Schizosaccharomyces pombe (strain 972 / ATCC 24843) OX=284812 GN=trm4b PE=1 SV=2	77.821	106
			0	0	0	0	0	0	0	0	0	12576	1	232.89	1.5	O13936	O13936	Transcription elongation factor spt5	spt5	sp|O13936|SPT5_SCHPO Transcription elongation factor spt5 OS=Schizosaccharomyces pombe (strain 972 / ATCC 24843) OX=284812 GN=spt5 PE=1 SV=1	109.01	107
			0	0	0	0	0	0	13530	1	644.29	128760	6	6131.4	17.8	O13940	O13940	Probable low-specificity L-threonine aldolase	gly1	sp|O13940|GLY1_SCHPO Probable low-specificity L-threonine aldolase OS=Schizosaccharomyces pombe (strain 972 / ATCC 24843) OX=284812 GN=gly1 PE=3 SV=1	41.318	108
			0	0	0	0	0	0	107720	6	2071.5	102300	5	1967.3	12.5	O13944	O13944	Oxysterol-binding protein homolog C23H4.01c		sp|O13944|YEH1_SCHPO Oxysterol-binding protein homolog C23H4.01c OS=Schizosaccharomyces pombe (strain 972 / ATCC 24843) OX=284812 GN=SPAC23H4.01c PE=1 SV=2	106.81	109
			0	0	0	0	0	0	0	0	0	27326	3	1821.7	16.7	O13950	O13950	Signal recognition particle receptor subunit beta	srp102	sp|O13950|SRPB_SCHPO Signal recognition particle receptor subunit beta OS=Schizosaccharomyces pombe (strain 972 / ATCC 24843) OX=284812 GN=srp102 PE=3 SV=1	25.611	110
			0	0	0	0	0	0	0	0	0	11070	1	481.3	3.9	O13953	O13953	Chromatin modification-related protein eaf3	alp13	sp|O13953|EAF3_SCHPO Chromatin modification-related protein eaf3 OS=Schizosaccharomyces pombe (strain 972 / ATCC 24843) OX=284812 GN=alp13 PE=1 SV=1	39.138	111
			0	0	0	0	0	0	9567.2	1	258.57	6006.3	1	162.33	1.1	O13956	O13956	Ribosome biogenesis protein tsr1 homolog	SPAC23H4.15	sp|O13956|TSR1_SCHPO Ribosome biogenesis protein tsr1 OS=Schizosaccharomyces pombe (strain 972 / ATCC 24843) OX=284812 GN=tsr1 PE=3 SV=1	90.125	112
			0	0	0	0	0	0	0	0	0	29392	3	1728.9	7.1	O13963	O13963	Diphosphomevalonate decarboxylase	mvd1	sp|O13963|MVD1_SCHPO Diphosphomevalonate decarboxylase OS=Schizosaccharomyces pombe (strain 972 / ATCC 24843) OX=284812 GN=mvd1 PE=3 SV=1	42.755	113
			0	0	0	0	0	0	303540	11	9198.1	1002400	14	30377	25.1	O13966	O13966	Aconitate hydratase, mitochondrial	SPAC24C9.06c	sp|O13966|ACON_SCHPO Aconitate hydratase, mitochondrial OS=Schizosaccharomyces pombe (strain 972 / ATCC 24843) OX=284812 GN=SPAC24C9.06c PE=3 SV=2	86.112	114
			0	0	0	0	0	0	0	0	0	23460	1	808.98	2.5	O13968	O13968	Uncharacterized carboxypeptidase C24C9.08	SPAC24C9.08	sp|O13968|YE48_SCHPO Uncharacterized carboxypeptidase C24C9.08 OS=Schizosaccharomyces pombe (strain 972 / ATCC 24843) OX=284812 GN=SPAC24C9.08 PE=3 SV=1	66.606	115
			739080	13	27373	18461	1	683.74	9176000	28	339850	14104000	30	522350	71.1	O13972	O13972	Probable serine hydroxymethyltransferase, cytosolic	SPAC24C9.12c	sp|O13972|GLYD_SCHPO Probable serine hydroxymethyltransferase, cytosolic OS=Schizosaccharomyces pombe (strain 972 / ATCC 24843) OX=284812 GN=SPAC24C9.12c PE=3 SV=1	51.86	116
			0	0	0	0	0	0	0	0	0	31249	1	2083.3	1.4	O13989	O13989	Uncharacterized protein C26H5.07c	SPAC26H5.07c	sp|O13989|YEG7_SCHPO Uncharacterized protein C26H5.07c OS=Schizosaccharomyces pombe (strain 972 / ATCC 24843) OX=284812 GN=SPAC26H5.07c PE=3 SV=2	56.858	117
			18195	1	957.63	0	0	0	298490	11	15710	905320	11	47648	39	O13991	O13991	Uncharacterized oxidoreductase C26H5.09c	SPAC26H5.09c	sp|O13991|YEG9_SCHPO Uncharacterized oxidoreductase C26H5.09c OS=Schizosaccharomyces pombe (strain 972 / ATCC 24843) OX=284812 GN=SPAC26H5.09c PE=2 SV=3	41.432	118
			27264	4	1298.3	0	0	0	680720	13	32415	1161700	15	55319	42.9	O13998	O13998	Obg-like ATPase 1	SPAC27E2.03c	sp|O13998|OLA1_SCHPO Obg-like ATPase 1 OS=Schizosaccharomyces pombe (strain 972 / ATCC 24843) OX=284812 GN=SPAC27E2.03c PE=1 SV=1	44.332	119
			0	0	0	0	0	0	10035	1	358.41	365380	10	13049	26.2	O14007	O14007	H/ACA ribonucleoprotein complex subunit 4	cbf5	sp|O14007|CBF5_SCHPO H/ACA ribonucleoprotein complex subunit cbf5 OS=Schizosaccharomyces pombe (strain 972 / ATCC 24843) OX=284812 GN=cbf5 PE=3 SV=1	53.11	120
			0	0	0	0	0	0	51379	3	5708.8	121440	4	13493	42	O14008	O14008	Myosin 1 light chain cam2	cam2	sp|O14008|CAM2_SCHPO Myosin 1 light chain cam2 OS=Schizosaccharomyces pombe (strain 972 / ATCC 24843) OX=284812 GN=cam2 PE=1 SV=1	16.218	121
			0	0	0	0	0	0	72544	1	1250.8	685270	1	11815	1.5	O14014	O14014	Probable Rho-type GTPase-activating protein 3	rga3	sp|O14014|RGA3_SCHPO Probable Rho-type GTPase-activating protein 3 OS=Schizosaccharomyces pombe (strain 972 / ATCC 24843) OX=284812 GN=rga3 PE=1 SV=1	108.65	122
			7465.2	1	257.42	0	0	0	183140	8	6315.1	395940	12	13653	34.4	O14018	O14018	Serine--tRNA ligase, cytoplasmic	SPAC29A4.15	sp|O14018|SYSC_SCHPO Serine--tRNA ligase, cytoplasmic OS=Schizosaccharomyces pombe (strain 972 / ATCC 24843) OX=284812 GN=SPAC29A4.15 PE=3 SV=1	51.642	123
			0	0	0	0	0	0	27081	2	933.81	112060	4	3864.1	9	O14019	O14019	Serine/threonine-protein kinase hal4	hal4	sp|O14019|HAL4_SCHPO Serine/threonine-protein kinase hal4 OS=Schizosaccharomyces pombe (strain 972 / ATCC 24843) OX=284812 GN=hal4 PE=1 SV=1	69.114	124
			0	0	0	0	0	0	0	0	0	13372	2	742.91	5.8	O14021	O14021	RbAp48-related WD40 repeat-containing protein prw1	prw1	sp|O14021|PRW1_SCHPO RbAp48-related WD40 repeat-containing protein prw1 OS=Schizosaccharomyces pombe (strain 972 / ATCC 24843) OX=284812 GN=prw1 PE=1 SV=1	48.476	125
			0	0	0	0	0	0	0	0	0	7142.4	2	230.4	4.6	O14023	O14023	Probable elongator complex protein 3	elp3	sp|O14023|ELP3_SCHPO elongator complex protein 3 OS=Schizosaccharomyces pombe (strain 972 / ATCC 24843) OX=284812 GN=elp3 PE=3 SV=1	61.849	126
			693780	11	40810	0	0	0	2091700	14	123040	4357000	18	256300	74.3	O14027	O14027	Probable pyridoxal 5-phosphate synthase subunit PDX1	snz1	sp|O14027|PDX1_SCHPO Probable pyridoxal 5-phosphate synthase subunit PDX1 OS=Schizosaccharomyces pombe (strain 972 / ATCC 24843) OX=284812 GN=snz1 PE=1 SV=1	31.403	127
			0	0	0	0	0	0	7388.6	1	95.955	0	0	0	0.9	O14029	O14029	COPII coat assembly protein sec16	sec16	sp|O14029|SEC16_SCHPO COPII coat assembly protein sec16 OS=Schizosaccharomyces pombe (strain 972 / ATCC 24843) OX=284812 GN=sec16 PE=1 SV=2	218.09	128
			0	0	0	0	0	0	9490.2	1	1355.7	15905	1	2272.1	15.2	O14037	O14037	UPF0538 protein C2C4.04c	SPAC2C4.04c	sp|O14037|YEY4_SCHPO UPF0538 protein C2C4.04c OS=Schizosaccharomyces pombe (strain 972 / ATCC 24843) OX=284812 GN=SPAC2C4.04c PE=3 SV=1	14.55	129
			0	0	0	0	0	0	255960	10	25596	175450	5	17545	59.6	O14043	O14043	Uncharacterized protein C2C4.10c	SPAC2C4.10c	sp|O14043|YEYA_SCHPO Uncharacterized protein C2C4.10c OS=Schizosaccharomyces pombe (strain 972 / ATCC 24843) OX=284812 GN=SPAC2C4.10c PE=4 SV=1	19.686	130
			0	0	0	0	0	0	0	0	0	20500	1	1576.9	3.7	O14044	O14044	Pre-rRNA-processing protein pno1	rbp28	sp|O14044|PNO1_SCHPO Pre-rRNA-processing protein pno1 OS=Schizosaccharomyces pombe (strain 972 / ATCC 24843) OX=284812 GN=rbp28 PE=1 SV=2	26.393	131
			0	0	0	0	0	0	800040	8	100000	4881100	10	610140	47	Q9P7B2;O14049	Q9P7B2;O14049	40S ribosomal protein S8-B;40S ribosomal protein S8-A	rps8b;rps8a	sp|Q9P7B2|RS8B_SCHPO 40S ribosomal protein S8-B OS=Schizosaccharomyces pombe (strain 972 / ATCC 24843) OX=284812 GN=rps802 PE=1 SV=1;sp|O14049|RS8A_SCHPO 40S ribosomal protein S8-A OS=Schizosaccharomyces pombe (strain 972 / ATCC 24843) OX=284812 GN=rps801	22.564	132
			0	0	0	0	0	0	0	0	0	17771	1	413.28	1.8	O14053	O14053	U3 small nucleolar RNA-associated protein 21 homolog	SPCC1672.07	sp|O14053|UTP21_SCHPO U3 small nucleolar RNA-associated protein 21 homolog OS=Schizosaccharomyces pombe (strain 972 / ATCC 24843) OX=284812 GN=SPCC1672.07 PE=3 SV=1	100.57	133
			0	0	0	0	0	0	160310	4	6165.9	241310	7	9281.3	22.9	O14055	O14055	Tyrosine--tRNA ligase, cytoplasmic	tys1	sp|O14055|SYYC_SCHPO Tyrosine--tRNA ligase, cytoplasmic OS=Schizosaccharomyces pombe (strain 972 / ATCC 24843) OX=284812 GN=tys1 PE=3 SV=1	44.575	134
			0	0	0	0	0	0	6400.4	1	246.17	18509	1	711.88	4.2	O14057	O14057	Probable guanine deaminase	SPCC1672.03c	sp|O14057|GUAD_SCHPO Probable guanine deaminase OS=Schizosaccharomyces pombe (strain 972 / ATCC 24843) OX=284812 GN=SPCC1672.03c PE=3 SV=1	58.046	135
			12469	1	2078.2	0	0	0	558720	7	93120	1918900	8	319820	57.2	O14062	O14062	40S ribosomal protein S12-A	rps12a	sp|O14062|RS12A_SCHPO 40S ribosomal protein S12-A OS=Schizosaccharomyces pombe (strain 972 / ATCC 24843) OX=284812 GN=rps1201 PE=3 SV=1	15.616	136
			0	0	0	0	0	0	43434	4	603.25	124730	9	1732.3	9.9	O14065	O14065	Uncharacterized protein C962.01		sp|O14065|YC31_SCHPO Uncharacterized protein C962.01 OS=Schizosaccharomyces pombe (strain 972 / ATCC 24843) OX=284812 GN=SPCC962.01 PE=2 SV=3	156.03	137
			341150	3	42643	36304	2	4537.9	955020	8	119380	2602800	10	325350	60.4	O14069	O14069	Probable 60S ribosomal protein L28e	rpl28e	sp|O14069|RL28E_SCHPO Probable 60S ribosomal protein L28e OS=Schizosaccharomyces pombe (strain 972 / ATCC 24843) OX=284812 GN=rpl44 PE=1 SV=1	14.755	138
			0	0	0	0	0	0	33349	3	513.06	156300	8	2404.6	9.7	O14072	O14072	Manganese-transporting ATPase 4	cta4	sp|O14072|ATC4_SCHPO Endoplasmic reticulum transmembrane helix translocase OS=Schizosaccharomyces pombe (strain 972 / ATCC 24843) OX=284812 GN=cta4 PE=1 SV=1	136.26	139
			11544	1	577.18	0	0	0	432990	9	21649	1173500	12	58675	49.4	O14075	O14075	Putative 2-hydroxyacid dehydrogenase UNK4.10		sp|O14075|YEAA_SCHPO Putative 2-hydroxyacid dehydrogenase UNK4.10 OS=Schizosaccharomyces pombe (strain 972 / ATCC 24843) OX=284812 GN=SPAC2E11.10 PE=2 SV=1	36.701	140
			0	0	0	0	0	0	0	0	0	1470400	3	26735	4.1	O14077	O14077	Putative zinc protease mug138	mug138	sp|O14077|MU138_SCHPO Putative zinc protease mug138 OS=Schizosaccharomyces pombe (strain 972 / ATCC 24843) OX=284812 GN=mug138 PE=1 SV=1	112.14	141
			0	0	0	0	0	0	0	0	0	41622	2	4624.6	9.6	O14080	O14080	Uncharacterized protein UNK4,15		sp|O14080|YEAF_SCHPO Uncharacterized protein UNK4,15 OS=Schizosaccharomyces pombe (strain 972 / ATCC 24843) OX=284812 GN=SPAC2E11.15 PE=4 SV=1	23.655	142
			0	0	0	0	0	0	96932	8	2254.2	378400	17	8800.1	25.6	O14081	O14081	Putative alpha,alpha-trehalose-phosphate synthase [UDP-forming] 106 kDa subunit		sp|O14081|TPSX_SCHPO Putative alpha,alpha-trehalose-phosphate synthase [UDP-forming] 106 kDa subunit OS=Schizosaccharomyces pombe (strain 972 / ATCC 24843) OX=284812 GN=SPAC2E11.16c PE=1 SV=1	106.82	143
			0	0	0	0	0	0	0	0	0	47266	4	1817.9	12.3	O14082	O14082	Uncharacterized protein UNK4.17		sp|O14082|YEAH_SCHPO Uncharacterized protein UNK4.17 OS=Schizosaccharomyces pombe (strain 972 / ATCC 24843) OX=284812 GN=SPAC2E11.17 PE=4 SV=2	45.755	144
			0	0	0	0	0	0	736510	1	28327	0	0	0	3.3	O14086	O14086	DNA-directed RNA polymerase I subunit rpa49	rpa49	sp|O14086|RPA49_SCHPO DNA-directed RNA polymerase I subunit rpa49 OS=Schizosaccharomyces pombe (strain 972 / ATCC 24843) OX=284812 GN=rpa49 PE=2 SV=1	48.066	145
			0	0	0	0	0	0	45684	3	2538	98135	4	5452	25.5	O14088	O14088	Uncharacterized oxidoreductase C2F3.05c	SPAC2F3.05c	sp|O14088|YER5_SCHPO Uncharacterized oxidoreductase C2F3.05c OS=Schizosaccharomyces pombe (strain 972 / ATCC 24843) OX=284812 GN=SPAC2F3.05c PE=3 SV=1	31.172	146
			0	0	0	0	0	0	14802	1	477.49	47237	1	1523.8	1.4	O14089	O14089	Importin subunit beta-2	kap104	sp|O14089|IMB2_SCHPO Importin subunit beta-2 OS=Schizosaccharomyces pombe (strain 972 / ATCC 24843) OX=284812 GN=kap104 PE=3 SV=1	101.72	147
			5804.5	1	200.15	0	0	0	84313	6	2907.3	166950	8	5756.9	33.5	O14092	O14092	5-aminolevulinate synthase, mitochondrial	hem1	sp|O14092|HEM1_SCHPO 5-aminolevulinate synthase, mitochondrial OS=Schizosaccharomyces pombe (strain 972 / ATCC 24843) OX=284812 GN=hem1 PE=3 SV=1	60.959	148
			0	0	0	0	0	0	0	0	0	11117	1	585.1	2.6	O14094	O14094	Putative exopolyphosphatase	SPAC2F3.11	sp|O14094|PPX1_SCHPO Putative exopolyphosphatase OS=Schizosaccharomyces pombe (strain 972 / ATCC 24843) OX=284812 GN=SPAC2F3.11 PE=3 SV=1	43.296	149
			0	0	0	0	0	0	351090	12	7470	312050	13	6639.4	17.5	O14100	O14100	Protein zds1	zds1	sp|O14100|ZDS1_SCHPO Protein zds1 OS=Schizosaccharomyces pombe (strain 972 / ATCC 24843) OX=284812 GN=zds1 PE=1 SV=2	103.1	150
			84115	3	4205.7	0	0	0	159050	11	7952.5	630120	14	31506	48.9	O14104	O14104	Homoisocitrate dehydrogenase	lys12	sp|O14104|LYS12_SCHPO Homoisocitrate dehydrogenase OS=Schizosaccharomyces pombe (strain 972 / ATCC 24843) OX=284812 GN=lys12 PE=1 SV=1	39.256	151
			22951	1	2295.1	0	0	0	27151	2	2715.1	127400	5	12740	39	O14105	O14105	Ribulose-phosphate 3-epimerase	SPAC31G5.05c	sp|O14105|RPE_SCHPO Ribulose-phosphate 3-epimerase OS=Schizosaccharomyces pombe (strain 972 / ATCC 24843) OX=284812 GN=SPAC31G5.05c PE=3 SV=1	25.205	152
			7592.5	1	361.55	0	0	0	66117	4	3148.4	268720	10	12796	35.4	O14110	O14110	Probable aminomethyltransferase, mitochondrial	gcv1	sp|O14110|GCST_SCHPO Probable aminomethyltransferase, mitochondrial OS=Schizosaccharomyces pombe (strain 972 / ATCC 24843) OX=284812 GN=gcv1 PE=3 SV=1	42.408	153
			0	0	0	0	0	0	7215.6	3	1030.8	289210	7	41316	36.1	O14112	O14112	40S ribosomal protein S10-A	rps10a	sp|O14112|RS10A_SCHPO 40S ribosomal protein S10-A OS=Schizosaccharomyces pombe (strain 972 / ATCC 24843) OX=284812 GN=rps1001 PE=3 SV=1	16.275	154
			0	0	0	0	0	0	0	0	0	6267.4	1	184.34	2.2	O14115	O14115	Patatin-like phospholipase domain-containing protein SPAC1786.01c		sp|O14115|TGL4_SCHPO Triacylglycerol lipase ptl2 OS=Schizosaccharomyces pombe (strain 972 / ATCC 24843) OX=284812 GN=ptl2 PE=3 SV=2	72.521	155
			7773.3	1	277.62	0	0	0	108290	7	3867.5	515930	14	18426	32.8	O14121	O14121	Probable NADH-ubiquinone oxidoreductase C3A11.07, mitochondrial	SPAC3A11.07	sp|O14121|NDH1_SCHPO Probable NADH-ubiquinone oxidoreductase C3A11.07, mitochondrial OS=Schizosaccharomyces pombe (strain 972 / ATCC 24843) OX=284812 GN=SPAC3A11.07 PE=3 SV=1	61.674	156
			0	0	0	0	0	0	58268	3	2913.4	201210	6	10060	21	O14126	O14126	26S protease regulatory subunit 6A	tbp1	sp|O14126|PRS6A_SCHPO 26S proteasome regulatory subunit 6A OS=Schizosaccharomyces pombe (strain 972 / ATCC 24843) OX=284812 GN=tbp1 PE=3 SV=1	48.835	157
			0	0	0	0	0	0	7914.1	1	376.86	9959.7	2	474.27	9.7	O14131	O14131	Meiotically up-regulated gene 191 protein	mug191	sp|O14131|MU191_SCHPO Meiotically up-regulated gene 191 protein OS=Schizosaccharomyces pombe (strain 972 / ATCC 24843) OX=284812 GN=mug191 PE=1 SV=1	49.78	158
			0	0	0	0	0	0	143320	6	2514.3	306350	16	5374.5	20.4	O14134	O14134	mRNA export factor elf1	elf1	sp|O14134|ELF1_SCHPO mRNA export factor elf1 OS=Schizosaccharomyces pombe (strain 972 / ATCC 24843) OX=284812 GN=elf1 PE=1 SV=1	116.7	159
			0	0	0	0	0	0	43408	2	1058.7	685310	11	16715	19.5	O14164	O14164	Eukaryotic translation initiation factor 3 subunit C	nip1	sp|O14164|EIF3C_SCHPO Eukaryotic translation initiation factor 3 subunit C OS=Schizosaccharomyces pombe (strain 972 / ATCC 24843) OX=284812 GN=nip1 PE=1 SV=2	104.37	160
			0	0	0	0	0	0	0	0	0	11204	1	746.94	7.2	O14171	O14171	Dehydrodolichyl diphosphate syntase complex subunit SPAC4D7.04c	SPAC4D7.04c	sp|O14171|YE54_SCHPO Dehydrodolichyl diphosphate synthase complex subunit SPAC4D7.04c OS=Schizosaccharomyces pombe (strain 972 / ATCC 24843) OX=284812 GN=SPAC4D7.04c PE=1 SV=2	30.543	161
			0	0	0	0	0	0	39435	1	1516.7	0	0	0	1.9	O14174	O14174	SAGA complex subunit spt20	spt20	sp|O14174|SPT20_SCHPO SAGA complex subunit spt20 OS=Schizosaccharomyces pombe (strain 972 / ATCC 24843) OX=284812 GN=spt20 PE=1 SV=1	54.028	162
			0	0	0	0	0	0	96160	1	1158.6	63423	1	764.13	0.7	O14188	O14188	Ras GTPase-activating-like protein rng2	rng2	sp|O14188|RNG2_SCHPO Ras GTPase-activating-like protein rng2 OS=Schizosaccharomyces pombe (strain 972 / ATCC 24843) OX=284812 GN=rng2 PE=1 SV=1	171.67	163
			0	0	0	0	0	0	279790	6	13323	763690	13	36366	35.7	O14192	O14192	Aromatic amino acid aminotransferase C56E4.03	SPAC56E4.03	sp|O14192|AATR1_SCHPO Aromatic amino acid aminotransferase C56E4.03 OS=Schizosaccharomyces pombe (strain 972 / ATCC 24843) OX=284812 GN=SPAC56E4.03 PE=3 SV=1	53.166	164
			0	0	0	0	0	0	0	0	0	8686.9	1	868.69	4.9	O14201	O14201	Meiotically up-regulated gene 86 protein	mug86	sp|O14201|MUG86_SCHPO Meiotically up-regulated gene 86 protein OS=Schizosaccharomyces pombe (strain 972 / ATCC 24843) OX=284812 GN=mug86 PE=1 SV=1	33.919	165
			0	0	0	0	0	0	0	0	0	8211.5	2	547.43	10.1	O14205	O14205	Vacuolar protein sorting-associated protein 74	vps74	sp|O14205|VPS74_SCHPO Vacuolar protein sorting-associated protein 74 OS=Schizosaccharomyces pombe (strain 972 / ATCC 24843) OX=284812 GN=vps74 PE=1 SV=2	38.375	166
			0	0	0	0	0	0	0	0	0	5235.2	1	237.96	4.1	O14206	O14206	Brix domain-containing protein C1B9.03c		sp|O14206|YDD3_SCHPO Brix domain-containing protein C1B9.03c OS=Schizosaccharomyces pombe (strain 972 / ATCC 24843) OX=284812 GN=SPAC1B9.03c PE=1 SV=2	44.261	167
			0	0	0	0	0	0	264420	1	3074.6	0	0	0	0.7	O14207	O14207	Protein mms22	mus7	sp|O14207|MMS22_SCHPO Protein mms22 OS=Schizosaccharomyces pombe (strain 972 / ATCC 24843) OX=284812 GN=mus7 PE=3 SV=1	217.43	168
			0	0	0	0	0	0	7739.8	1	368.56	87637	5	4173.2	13.5	O14209	O14209	Uncharacterized aminotransferase C6B12.04c	SPAC6B12.04c	sp|O14209|YDT4_SCHPO Uncharacterized aminotransferase C6B12.04c OS=Schizosaccharomyces pombe (strain 972 / ATCC 24843) OX=284812 GN=SPAC6B12.04c PE=3 SV=1	47.569	169
			0	0	0	0	0	0	389520	11	11129	779910	10	22283	30.1	O14217	O14217	Probable mitochondrial import receptor subunit tom70	tom70	sp|O14217|TOM70_SCHPO Probable mitochondrial import receptor subunit tom70 OS=Schizosaccharomyces pombe (strain 972 / ATCC 24843) OX=284812 GN=tom70 PE=1 SV=1	69.516	170
			0	0	0	0	0	0	4828.6	1	603.57	9905.8	1	1238.2	23.9	O14224	O14224	Rho GDP-dissociation inhibitor	SPAC6F12.06	sp|O14224|GDIR_SCHPO Rho GDP-dissociation inhibitor OS=Schizosaccharomyces pombe (strain 972 / ATCC 24843) OX=284812 GN=SPAC6F12.06 PE=1 SV=1	23.031	171
			0	0	0	0	0	0	0	0	0	35988	1	4498.4	7.2	O14225	O14225	Mitochondrial import receptor subunit tom20	tom20	sp|O14225|TOM20_SCHPO Mitochondrial import receptor subunit tom20 OS=Schizosaccharomyces pombe (strain 972 / ATCC 24843) OX=284812 GN=tom20 PE=3 SV=1	17.529	172
			13818	1	212.59	0	0	0	617960	15	9507	1214300	25	18682	32.4	O14228	O14228	Probable phosphoribosylformylglycinamidine synthase	ade3	sp|O14228|PUR4_SCHPO Probable phosphoribosylformylglycinamidine synthase OS=Schizosaccharomyces pombe (strain 972 / ATCC 24843) OX=284812 GN=ade3 PE=3 SV=1	144.86	173
			0	0	0	0	0	0	640860	10	40054	1125800	8	70364	33.7	O14230	O14230	Farnesyl pyrophosphate synthase	fps1	sp|O14230|FPPS_SCHPO Farnesyl pyrophosphate synthase OS=Schizosaccharomyces pombe (strain 972 / ATCC 24843) OX=284812 GN=fps1 PE=1 SV=1	39.516	174
			0	0	0	0	0	0	7333	1	118.27	14752	1	237.94	1.3	O14232	O14232	ATP-dependent RNA helicase mtr4	mtr4	sp|O14232|MTR4_SCHPO ATP-dependent RNA helicase mtr4 OS=Schizosaccharomyces pombe (strain 972 / ATCC 24843) OX=284812 GN=mtr4 PE=1 SV=1	126.19	175
			0	0	0	0	0	0	0	0	0	5835.8	1	153.57	1.5	O14233	O14233	mRNA 3-end-processing protein rna14	rna14	sp|O14233|RNA14_SCHPO mRNA 3-end-processing protein rna14 OS=Schizosaccharomyces pombe (strain 972 / ATCC 24843) OX=284812 GN=rna14 PE=3 SV=1	83.925	176
			0	0	0	0	0	0	91010	4	4550.5	217480	7	10874	21.1	O14241	O14241	Actin-related protein 2/3 complex subunit 2	arc2	sp|O14241|ARPC2_SCHPO Actin-related protein 2/3 complex subunit 2 OS=Schizosaccharomyces pombe (strain 972 / ATCC 24843) OX=284812 GN=arc2 PE=1 SV=1	36.974	177
			0	0	0	0	0	0	0	0	0	4184.7	1	199.27	3	O14249	O14249	probable cardiolipin-specific deacylase, mitochondrial	SPAC6G10.03c	sp|O14249|CLD1_SCHPO Probable cardiolipin-specific deacylase 1, mitochondrial OS=Schizosaccharomyces pombe (strain 972 / ATCC 24843) OX=284812 GN=SPAC6G10.03c PE=3 SV=1	48.72	178
			0	0	0	0	0	0	121410	2	8671.8	255090	4	18221	21.7	O14250	O14250	Probable proteasome subunit alpha type-6	SPAC6G10.04c	sp|O14250|PSA6_SCHPO Probable proteasome subunit alpha type-6 OS=Schizosaccharomyces pombe (strain 972 / ATCC 24843) OX=284812 GN=SPAC6G10.04c PE=3 SV=1	30.11	179
			0	0	0	0	0	0	0	0	0	7957.4	1	189.46	1.7	O14253	O14253	Nuclear cap-binding protein subunit 1	cbc1	sp|O14253|NCBP1_SCHPO Nuclear cap-binding protein subunit 1 OS=Schizosaccharomyces pombe (strain 972 / ATCC 24843) OX=284812 GN=cbc1 PE=1 SV=1	90.077	180
			13607	1	544.27	0	0	0	151110	6	6044.4	338570	10	13543	32.6	O14254	O14254	Probable isocitrate dehydrogenase [NADP], mitochondrial	idp1	sp|O14254|IDHP_SCHPO Probable isocitrate dehydrogenase [NADP], mitochondrial OS=Schizosaccharomyces pombe (strain 972 / ATCC 24843) OX=284812 GN=idp1 PE=3 SV=2	49.478	181
			0	0	0	0	0	0	7126.6	1	154.93	110220	5	2396.1	8.2	O14255	O14255	Probable mannosyl-oligosaccharide glucosidase	SPAC6G10.09	sp|O14255|GCS1_SCHPO Probable mannosyl-oligosaccharide glucosidase OS=Schizosaccharomyces pombe (strain 972 / ATCC 24843) OX=284812 GN=SPAC6G10.09 PE=3 SV=1	92.888	182
			0	0	0	0	0	0	20963	2	487.52	0	0	0	2.7	O14260	O14260	UPF0592 membrane protein C7D4.03c	SPAC7D4.03c	sp|O14260|YFP3_SCHPO UPF0592 membrane protein C7D4.03c OS=Schizosaccharomyces pombe (strain 972 / ATCC 24843) OX=284812 GN=SPAC7D4.03c PE=3 SV=1	101.02	183
			0	0	0	0	0	0	0	0	0	22283	1	891.33	3.3	O14265	O14265	V-type proton ATPase subunit H	vma13	sp|O14265|VATH_SCHPO V-type proton ATPase subunit H OS=Schizosaccharomyces pombe (strain 972 / ATCC 24843) OX=284812 GN=vma13 PE=3 SV=2	51.436	184
			20580	2	857.51	11787	1	491.12	85247	3	3551.9	134590	3	5607.9	8.8	O14273	O14273	Meiotically up-regulated protein C8C9.04	SPAC8C9.04	sp|O14273|YET4_SCHPO Meiotically up-regulated protein C8C9.04 OS=Schizosaccharomyces pombe (strain 972 / ATCC 24843) OX=284812 GN=SPAC8C9.04 PE=1 SV=1	67.035	185
			0	0	0	0	0	0	0	0	0	28019	1	14009	16.7	O14280	O14280	Uncharacterized bolA-like protein C8C9.11	SPAC8C9.11	sp|O14280|YETB_SCHPO Uncharacterized bolA-like protein C8C9.11 OS=Schizosaccharomyces pombe (strain 972 / ATCC 24843) OX=284812 GN=SPAC8C9.11 PE=3 SV=2	9.5279	186
			0	0	0	0	0	0	1182500	24	33786	2341700	26	66906	50.8	O14289	O14289	3-isopropylmalate dehydratase	leu2	sp|O14289|LEUC_SCHPO 3-isopropylmalate dehydratase OS=Schizosaccharomyces pombe (strain 972 / ATCC 24843) OX=284812 GN=leu2 PE=1 SV=1	82.782	187
			3555.4	1	355.54	0	0	0	13513	2	1351.3	0	0	0	12.8	O14290	O14290	Uncharacterized protein C9E9.04	SPAC9E9.04	sp|O14290|YF14_SCHPO Uncharacterized protein C9E9.04 OS=Schizosaccharomyces pombe (strain 972 / ATCC 24843) OX=284812 GN=SPAC9E9.04 PE=4 SV=1	21.238	188
			90477	4	3351	0	0	0	2285500	19	84647	4158100	21	154010	61	O14293	O14293	Putative aldehyde dehydrogenase-like protein C9E9.09c	SPAC9E9.09c	sp|O14293|YF19_SCHPO Putative aldehyde dehydrogenase-like protein C9E9.09c OS=Schizosaccharomyces pombe (strain 972 / ATCC 24843) OX=284812 GN=SPAC9E9.09c PE=1 SV=1	54.768	189
			13881	1	730.56	0	0	0	148290	7	7804.6	366980	7	19314	30.3	O14295	O14295	Pyridoxal reductase	plr1	sp|O14295|PLR1_SCHPO Pyridoxal reductase OS=Schizosaccharomyces pombe (strain 972 / ATCC 24843) OX=284812 GN=plr1 PE=1 SV=1	36.814	190
			0	0	0	0	0	0	29033	2	879.79	183810	6	5570	12.6	O14301	O14301	Uncharacterized WD repeat-containing protein C9G1.05	SPAC9G1.05	sp|O14301|YE85_SCHPO Uncharacterized WD repeat-containing protein C9G1.05 OS=Schizosaccharomyces pombe (strain 972 / ATCC 24843) OX=284812 GN=SPAC9G1.05 PE=3 SV=1	65.266	191
			0	0	0	0	0	0	0	0	0	18283	1	794.93	2.7	O14307	O14307	tRNA (adenine(58)-N(1))-methyltransferase catalytic subunit trm61	cpd1	sp|O14307|TRM61_SCHPO tRNA (adenine(58)-N(1))-methyltransferase catalytic subunit trm61 OS=Schizosaccharomyces pombe (strain 972 / ATCC 24843) OX=284812 GN=cpd1 PE=3 SV=1	41.733	192
			331780	7	36864	13866	2	1540.7	773870	9	85986	1592700	11	176960	92.9	O14313	O14313	Putative peroxiredoxin pmp20	pmp20	sp|O14313|PMP20_SCHPO Peroxisomal membrane associated protein 20 OS=Schizosaccharomyces pombe (strain 972 / ATCC 24843) OX=284812 GN=pmp20 PE=1 SV=2	16.675	193
			0	0	0	0	0	0	6962	1	1392.4	95641	3	19128	29.1	O14317;P17478;P08094	O14317;P17478;P08094	60S acidic ribosomal protein P2-C;60S acidic ribosomal protein P2-beta;60S acidic ribosomal protein P2-alpha	rpp203;rpp202;rpp201	sp|O14317|RLA6_SCHPO 60S acidic ribosomal protein P2-C OS=Schizosaccharomyces pombe (strain 972 / ATCC 24843) OX=284812 GN=rpp203 PE=1 SV=2;sp|P17478|RLA4_SCHPO 60S acidic ribosomal protein P2-beta OS=Schizosaccharomyces pombe (strain 972 / ATCC 24843) OX=	11.114	194
			23209	2	1289.4	0	0	0	392600	9	21811	677110	11	37617	43.9	O14321	O14321	Sterol 24-C-methyltransferase erg6	erg6	sp|O14321|ERG6_SCHPO Sterol 24-C-methyltransferase erg6 OS=Schizosaccharomyces pombe (strain 972 / ATCC 24843) OX=284812 GN=erg6 PE=2 SV=1	42.867	195
			0	0	0	0	0	0	0	0	0	24527	1	1886.7	7	O14324	O14324	Uncharacterized membrane protein C16E9.09c	SPBC16E9.09c	sp|O14324|YB79_SCHPO Uncharacterized membrane protein C16E9.09c OS=Schizosaccharomyces pombe (strain 972 / ATCC 24843) OX=284812 GN=SPBC16E9.09c PE=3 SV=1	24.845	196
			0	0	0	0	0	0	10077	3	234.35	9102.6	3	211.69	5.9	O14326	O14326	E3 ubiquitin-protein ligase pub3	pub3	sp|O14326|PUB3_SCHPO E3 ubiquitin-protein ligase pub3 OS=Schizosaccharomyces pombe (strain 972 / ATCC 24843) OX=284812 GN=pub3 PE=2 SV=1	89.259	197
			0	0	0	0	0	0	8002	1	1333.7	8032.5	1	1338.8	7.8	O14327	O14327	Polyadenylate-binding protein 2	pab2	sp|O14327|PAB2_SCHPO Polyadenylate-binding protein 2 OS=Schizosaccharomyces pombe (strain 972 / ATCC 24843) OX=284812 GN=pab2 PE=1 SV=1	18.461	198
			0	1	0	0	0	0	144150	12	14415	752440	10	75244	55.6	O14339	O14339	60S ribosomal protein L17-A	rpl17a	sp|O14339|RL17A_SCHPO 60S ribosomal protein L17-A OS=Schizosaccharomyces pombe (strain 972 / ATCC 24843) OX=284812 GN=rpl1701 PE=3 SV=1	20.814	199
			0	0	0	0	0	0	15650	1	195.62	79363	6	992.04	7.2	O14340	O14340	Oxysterol-binding protein homolog C2F12.05c	SPBC2F12.05c	sp|O14340|YB35_SCHPO Oxysterol-binding protein homolog C2F12.05c OS=Schizosaccharomyces pombe (strain 972 / ATCC 24843) OX=284812 GN=SPBC2F12.05c PE=1 SV=2	148.47	200
			44356	4	2112.2	0	0	0	346280	11	16490	914970	14	43570	40.1	O14344	O14344	Inosine-5-monophosphate dehydrogenase	gua1	sp|O14344|IMDH_SCHPO Inosine-5-monophosphate dehydrogenase OS=Schizosaccharomyces pombe (strain 972 / ATCC 24843) OX=284812 GN=gua1 PE=2 SV=1	57.026	201
			0	0	0	0	0	0	6528.5	2	343.6	23442	1	1233.8	9.6	O14349	O14349	IMP-specific 5-nucleotidase 1	isn1	sp|O14349|ISN1_SCHPO IMP-specific 5-nucleotidase 1 OS=Schizosaccharomyces pombe (strain 972 / ATCC 24843) OX=284812 GN=isn1 PE=3 SV=1	45.805	202
			0	0	0	0	0	0	250060	8	13892	499450	8	27747	51	O14351	O14351	Uncharacterized oxidoreductase C30D10.05c	SPBC30D10.05c	sp|O14351|YB45_SCHPO Uncharacterized oxidoreductase C30D10.05c OS=Schizosaccharomyces pombe (strain 972 / ATCC 24843) OX=284812 GN=SPBC30D10.05c PE=3 SV=1	26.645	203
			0	0	0	0	0	0	0	0	0	4872.7	1	180.47	1.9	O14353	O14353	Biotin--protein ligase;Biotin--[methylmalonyl-CoA-carboxytransferase] ligase;Biotin--[propionyl-CoA-carboxylase [ATP-hydrolyzing]] ligase;Biotin--[methylcrotonoyl-CoA-carboxylase] ligase;Biotin--[acetyl-CoA-carboxylase] ligase	bpl1	sp|O14353|BPL1_SCHPO Biotin--protein ligase OS=Schizosaccharomyces pombe (strain 972 / ATCC 24843) OX=284812 GN=bpl1 PE=3 SV=1	70.631	204
			17370	2	1158	0	0	0	14162	1	944.11	96804	4	6453.6	23.7	O14359	O14359	Uncharacterized AIM2 family protein C30D10.14	SPBC30D10.14	sp|O14359|YB4E_SCHPO Uncharacterized AIM2 family protein C30D10.14 OS=Schizosaccharomyces pombe (strain 972 / ATCC 24843) OX=284812 GN=SPBC30D10.14 PE=3 SV=1	27.414	205
			0	0	0	0	0	0	19100	2	1193.8	19671	2	1229.5	17.3	O14361	O14361	Putative prephenate dehydratase	pha2	sp|O14361|PHA2_SCHPO Putative prephenate dehydratase OS=Schizosaccharomyces pombe (strain 972 / ATCC 24843) OX=284812 GN=pha2 PE=3 SV=2	29.871	206
			0	0	0	0	0	0	4336	1	289.07	64749	5	4316.6	9.7	O14362	O14362	Cell wall biosynthesis/cell cycle regulator smi1	smi1	sp|O14362|SMI1_SCHPO Cell wall biosynthesis/cell cycle regulator smi1 OS=Schizosaccharomyces pombe (strain 972 / ATCC 24843) OX=284812 GN=smi1 PE=1 SV=1	55.557	207
			0	2	0	0	0	0	3486.4	3	387.38	7429.9	6	825.55	23.1	O14363	O14363	60S ribosomal protein L1-A	rpl1a	sp|O14363|RL1A_SCHPO 60S ribosomal protein L1-A OS=Schizosaccharomyces pombe (strain 972 / ATCC 24843) OX=284812 GN=rpl102 PE=1 SV=1	23.884	208
			0	0	0	0	0	0	222240	4	17096	453320	6	34871	24	O14369	O14369	Probable RNA-binding protein sce3	sce3	sp|O14369|SCE3_SCHPO Probable RNA-binding protein sce3 OS=Schizosaccharomyces pombe (strain 972 / ATCC 24843) OX=284812 GN=sce3 PE=1 SV=1	42.513	209
			13168	1	572.52	0	0	0	206170	8	8963.7	563760	9	24512	30.9	O14370	O14370	Branched-chain-amino-acid aminotransferase, mitochondrial	eca39	sp|O14370|BCA1_SCHPO Branched-chain-amino-acid aminotransferase, mitochondrial OS=Schizosaccharomyces pombe (strain 972 / ATCC 24843) OX=284812 GN=eca39 PE=1 SV=3	47.855	210
			7692.4	1	1282.1	0	0	0	1574700	11	262450	4825100	10	804180	63.2	O14388	O14388	60S ribosomal protein L27-A	rpl27a	sp|O14388|RL27A_SCHPO 60S ribosomal protein L27-A OS=Schizosaccharomyces pombe (strain 972 / ATCC 24843) OX=284812 GN=rpl2701 PE=2 SV=2	15.389	211
			0	0	0	0	0	0	0	0	0	10736	1	3578.6	17.9	O14399	O14399	Ubiquitin-like protein 1	ubl1	sp|O14399|UBL1_SCHPO Ubiquitin-like protein 1 OS=Schizosaccharomyces pombe (strain 972 / ATCC 24843) OX=284812 GN=ubl1 PE=3 SV=1	8.6609	212
			380680	13	8275.7	0	0	0	9279900	45	201740	16599000	50	360840	73	O14460;O94316	O14460	Elongation factor 2	eft201	sp|O14460|EF2_SCHPO Elongation factor 2 OS=Schizosaccharomyces pombe (strain 972 / ATCC 24843) OX=284812 GN=eft201 PE=1 SV=2	93.23	213
			290510	2	48418	0	0	0	666460	8	111080	794890	7	132480	91.3	O14463	O14463	Thioredoxin-1	trx1	sp|O14463|TRX1_SCHPO Thioredoxin-1 OS=Schizosaccharomyces pombe (strain 972 / ATCC 24843) OX=284812 GN=trx1 PE=3 SV=3	11.297	214
			0	0	0	0	0	0	0	0	0	66462	3	4747.3	20.3	O14466	O14466	Dolichol-phosphate mannosyltransferase	dpm1	sp|O14466|DPM1_SCHPO Dolichol-phosphate mannosyltransferase OS=Schizosaccharomyces pombe (strain 972 / ATCC 24843) OX=284812 GN=dpm1 PE=2 SV=1	26.672	215
			0	0	0	0	0	0	73338	5	3333.6	158870	6	7221.6	27.1	O36016	O36016	Serine/threonine-protein phosphatase 2A activator 1	rrd1	sp|O36016|PTPA1_SCHPO Serine/threonine-protein phosphatase 2A activator 1 OS=Schizosaccharomyces pombe (strain 972 / ATCC 24843) OX=284812 GN=rrd1 PE=3 SV=1	37.169	216
			0	0	0	0	0	0	0	0	0	17809	2	434.37	3	O36021	O36021	Uncharacterized protein C4F10.09c	SPAC4F10.09c	sp|O36021|YEK9_SCHPO Uncharacterized protein C4F10.09c OS=Schizosaccharomyces pombe (strain 972 / ATCC 24843) OX=284812 GN=SPAC4F10.09c PE=1 SV=1	97.992	217
			0	0	0	0	0	0	0	0	0	5875.8	1	391.72	3.9	O36022	O36022	Mannan polymerase complex subunit mnn9	mnn9	sp|O36022|MNN9_SCHPO Mannan polymerase complex subunit mnn9 OS=Schizosaccharomyces pombe (strain 972 / ATCC 24843) OX=284812 GN=mnn9 PE=3 SV=1	38.296	218
			0	0	0	0	0	0	67656	4	2941.6	134600	5	5852	13.6	O36023	O36023	Septin homolog spn1	spn1	sp|O36023|SPN1_SCHPO Septin homolog spn1 OS=Schizosaccharomyces pombe (strain 972 / ATCC 24843) OX=284812 GN=spn1 PE=1 SV=2	53.737	219
			0	0	0	0	0	0	0	0	0	2997800	4	65169	5.8	O36025	O36025	GYF domain-containing protein mpd2	mpd2	sp|O36025|MPD2_SCHPO GYF domain-containing protein mpd2 OS=Schizosaccharomyces pombe (strain 972 / ATCC 24843) OX=284812 GN=mpd2 PE=1 SV=1	106.14	220
			216510	2	36085	0	0	0	218110	5	36351	1105000	7	184160	87.1	O36032	O36032	Glutaredoxin-1	grx1	sp|O36032|GLRX1_SCHPO Glutaredoxin-1 OS=Schizosaccharomyces pombe (strain 972 / ATCC 24843) OX=284812 GN=grx1 PE=3 SV=1	11.261	221
			0	0	0	0	0	0	23758	4	989.9	262310	9	10930	24	O42644	O42644	CTP synthase	ura7	sp|O42644|PYRG_SCHPO CTP synthase OS=Schizosaccharomyces pombe (strain 972 / ATCC 24843) OX=284812 GN=ura7 PE=3 SV=1	66.867	222
			0	0	0	0	0	0	145240	7	6051.5	609060	12	25377	43.3	O42652	O42652	Aspartate aminotransferase, cytoplasmic	aat2	sp|O42652|AATC_SCHPO Aspartate aminotransferase, cytoplasmic OS=Schizosaccharomyces pombe (strain 972 / ATCC 24843) OX=284812 GN=aat2 PE=1 SV=1	46.14	223
			0	0	0	0	0	0	0	0	0	19743	2	4935.7	29.9	O42661	O42661	Small nuclear ribonucleoprotein Sm D1	smd1	sp|O42661|SMD1_SCHPO Small nuclear ribonucleoprotein Sm D1 OS=Schizosaccharomyces pombe (strain 972 / ATCC 24843) OX=284812 GN=smd1 PE=1 SV=1	13.089	224
			0	0	0	0	0	0	0	0	0	68109	1	8513.7	4.8	O42665	O42665	Uncharacterized but2-like protein C27D7.11c	SPAC27D7.11c	sp|O42665|YF8B_SCHPO Uncharacterized but2-like protein C27D7.11c OS=Schizosaccharomyces pombe (strain 972 / ATCC 24843) OX=284812 GN=SPAC27D7.11c PE=3 SV=1	48.392	225
			0	0	0	0	0	0	0	0	0	37185	3	715.1	3.1	O42668	O42668	Tetratricopeptide repeat protein 1	tpr1	sp|O42668|TPR1_SCHPO Tetratricopeptide repeat protein 1 OS=Schizosaccharomyces pombe (strain 972 / ATCC 24843) OX=284812 GN=tpr1 PE=1 SV=1	119.15	226
			0	2	0	0	1	0	23818	10	2977.2	290590	12	36324	34.7	O42699	O42699	60S ribosomal protein L19-B	rpl19b	sp|O42699|RL19B_SCHPO 60S ribosomal protein L19-B OS=Schizosaccharomyces pombe (strain 972 / ATCC 24843) OX=284812 GN=rpl1902 PE=2 SV=2	22.753	227
			845300	14	46961	62682	3	3482.3	619850	8	34436	1593200	13	88513	73.9	O42700	O42700	Transaldolase	tal1	sp|O42700|TAL1_SCHPO Transaldolase OS=Schizosaccharomyces pombe (strain 972 / ATCC 24843) OX=284812 GN=tal1 PE=1 SV=2	35.238	228
			0	0	0	0	0	0	0	2	0	121430	5	24286	50.6	O42706	O42706	60S ribosomal protein L21-B	rpl21b	sp|O42706|RL21B_SCHPO 60S ribosomal protein L21-B OS=Schizosaccharomyces pombe (strain 972 / ATCC 24843) OX=284812 GN=rpl2102 PE=2 SV=2	18.353	229
			7898.8	1	789.88	0	0	0	45209	1	4520.9	114240	1	11424	5.9	O42842	O42842	Adenine phosphoribosyltransferase	apt1	sp|O42842|APT_SCHPO Adenine phosphoribosyltransferase OS=Schizosaccharomyces pombe (strain 972 / ATCC 24843) OX=284812 GN=apt1 PE=3 SV=1	20.746	230
			0	0	0	0	0	0	0	0	0	11789	1	471.58	2	O42844	O42844	Calcium/calmodulin-dependent protein kinase type II	cmk2	sp|O42844|KCC2_SCHPO Calcium/calmodulin-dependent protein kinase type II OS=Schizosaccharomyces pombe (strain 972 / ATCC 24843) OX=284812 GN=cmk2 PE=1 SV=1	56.609	231
			12035	2	3008.7	0	0	0	182450	4	45613	1035400	5	258860	53.2	Q9URT8;O42846	Q9URT8;O42846	60S ribosomal protein L34-B;60S ribosomal protein L34-A	rpl34b;rpl34a	sp|Q9URT8|RL34B_SCHPO 60S ribosomal protein L34-B OS=Schizosaccharomyces pombe (strain 972 / ATCC 24843) OX=284812 GN=rpl3402 PE=1 SV=1;sp|O42846|RL34A_SCHPO 60S ribosomal protein L34-A OS=Schizosaccharomyces pombe (strain 972 / ATCC 24843) OX=284812 GN=rp	12.8	232
			7234.9	1	723.49	0	0	0	433170	4	43317	1526300	5	152630	29.4	O42848;O42991;O43004	O42848;O42991	60S ribosomal protein L16-A;60S ribosomal protein L16-B	rpl16a;rpl16b	sp|O42848|RL16A_SCHPO 60S ribosomal protein L16-A OS=Schizosaccharomyces pombe (strain 972 / ATCC 24843) OX=284812 GN=rpl1602 PE=1 SV=1;sp|O42991|RL16B_SCHPO 60S ribosomal protein L16-B OS=Schizosaccharomyces pombe (strain 972 / ATCC 24843) OX=284812 GN=rp	22.005	233
			0	0	0	0	0	0	96577	5	2840.5	539350	11	15863	27	O42849	O42849	Phenylalanine--tRNA ligase beta subunit	frs1	sp|O42849|SYFB_SCHPO Phenylalanine--tRNA ligase beta subunit OS=Schizosaccharomyces pombe (strain 972 / ATCC 24843) OX=284812 GN=frs1 PE=3 SV=1	66.849	234
			0	0	0	0	0	0	19498	1	1392.7	23894	2	1706.7	9.3	O42851	O42851	Uncharacterized trans-sulfuration enzyme C23A1.14c	SPAC23A1.14c	sp|O42851|YFHE_SCHPO Uncharacterized trans-sulfuration enzyme C23A1.14c OS=Schizosaccharomyces pombe (strain 972 / ATCC 24843) OX=284812 GN=SPAC23A1.14c PE=2 SV=1	43.284	235
			0	0	0	0	0	0	0	0	0	9662.6	1	146.4	1.4	O42854	O42854	SH3 domain-containing protein C23A1.17	SPAC23A1.17	sp|O42854|YFHH_SCHPO SH3 domain-containing protein C23A1.17 OS=Schizosaccharomyces pombe (strain 972 / ATCC 24843) OX=284812 GN=SPAC23A1.17 PE=1 SV=1	170.53	236
			0	0	0	0	0	0	0	0	0	52256	3	1136	4	O42861	O42861	ATP-dependent helicase fft3	fft3	sp|O42861|FFT3_SCHPO ATP-dependent helicase fft3 OS=Schizosaccharomyces pombe (strain 972 / ATCC 24843) OX=284812 GN=fft3 PE=1 SV=1	104.5	237
			0	0	0	0	0	0	0	0	0	6231	1	159.77	3	O42869	O42869	Uncharacterized protein C3G9.05	SPAC3G9.05	sp|O42869|YF75_SCHPO Uncharacterized protein C3G9.05 OS=Schizosaccharomyces pombe (strain 972 / ATCC 24843) OX=284812 GN=SPAC3G9.05 PE=1 SV=1	73.872	238
			0	0	0	0	0	0	147360	9	5262.9	320260	12	11438	40.3	O42870	O42870	Phenylalanine--tRNA ligase alpha subunit	frs2	sp|O42870|SYFA_SCHPO Phenylalanine--tRNA ligase alpha subunit OS=Schizosaccharomyces pombe (strain 972 / ATCC 24843) OX=284812 GN=frs2 PE=3 SV=3	56.266	239
			0	0	0	0	0	0	0	0	0	12576	1	369.89	1.8	O42873	O42873	Putative pyruvate decarboxylase C3G9.11c	SPAC3G9.11c	sp|O42873|PDC4_SCHPO Putative pyruvate decarboxylase C3G9.11c OS=Schizosaccharomyces pombe (strain 972 / ATCC 24843) OX=284812 GN=SPAC3G9.11c PE=3 SV=1	62.652	240
			0	0	0	0	0	0	3409.8	1	136.39	41252	3	1650.1	7	O42885;Q9P6J9	O42885	Putative inorganic phosphate transporter C8E4.01c		sp|O42885|YBN1_SCHPO Putative inorganic phosphate transporter C8E4.01c OS=Schizosaccharomyces pombe (strain 972 / ATCC 24843) OX=284812 GN=SPBC8E4.01c PE=1 SV=2	63.645	241
			0	0	0	0	0	0	0	0	0	17254	1	908.12	3.9	O42887	O42887	Putative agmatinase 2	SPBC8E4.03	sp|O42887|SPEB2_SCHPO Putative agmatinase 2 OS=Schizosaccharomyces pombe (strain 972 / ATCC 24843) OX=284812 GN=SPBC8E4.03 PE=3 SV=1	45.901	242
			30026	3	1580.3	0	0	0	6559.7	1	345.25	37664	3	1982.3	18.8	O42888	O42888	Uncharacterized oxidoreductase C8E4.04	SPBC8E4.04	sp|O42888|YBN4_SCHPO Uncharacterized oxidoreductase C8E4.04 OS=Schizosaccharomyces pombe (strain 972 / ATCC 24843) OX=284812 GN=SPBC8E4.04 PE=3 SV=1	36.628	243
			0	0	0	0	0	0	21862	2	496.86	155700	7	3538.6	9.8	O42893	O42893	Neutral trehalase	ntp1	sp|O42893|TREA_SCHPO Cytosolic neutral trehalase OS=Schizosaccharomyces pombe (strain 972 / ATCC 24843) OX=284812 GN=ntp1 PE=1 SV=1	84.602	244
			0	0	0	0	0	0	110900	4	5041.1	273160	7	12417	20.7	O42896	O42896	Uncharacterized oxidoreductase C115.03		sp|O42896|YBQ3_SCHPO Uncharacterized oxidoreductase C115.03 OS=Schizosaccharomyces pombe (strain 972 / ATCC 24843) OX=284812 GN=SPBC115.03 PE=3 SV=1	41.271	245
			0	0	0	0	0	0	0	0	0	101340	4	3897.6	10.3	O42897	O42897	Probable 26S proteasome regulatory subunit rpn3	rpn3	sp|O42897|RPN3_SCHPO Probable 26S proteasome regulatory subunit rpn3 OS=Schizosaccharomyces pombe (strain 972 / ATCC 24843) OX=284812 GN=rpn3 PE=3 SV=2	57.346	246
			0	0	0	0	0	0	6171.9	1	246.88	3733.3	1	149.33	7.5	O42903	O42903	GRIP domain-containing protein C119.12	SPBC119.12	sp|O42903|YBAC_SCHPO GRIP domain-containing protein C119.12 OS=Schizosaccharomyces pombe (strain 972 / ATCC 24843) OX=284812 GN=SPBC119.12 PE=2 SV=1	46.153	247
			0	0	0	0	0	0	0	0	0	21621	1	1544.4	3.8	O42906	O42906	GPN-loop GTPase 1	SPBC119.15	sp|O42906|GPN1_SCHPO GPN-loop GTPase 1 OS=Schizosaccharomyces pombe (strain 972 / ATCC 24843) OX=284812 GN=SPBC119.15 PE=1 SV=1	41.642	248
			0	0	0	0	0	0	0	0	0	7276.4	1	173.25	2.6	O42908	O42908	Mitochondrial presequence protease	cym1	sp|O42908|CYM1_SCHPO Mitochondrial presequence protease OS=Schizosaccharomyces pombe (strain 972 / ATCC 24843) OX=284812 GN=cym1 PE=3 SV=1	98.969	249
			0	0	0	0	0	0	34288	1	1904.9	48831	3	2712.9	9.5	O42909	O42909	Zinc-type alcohol dehydrogenase-like protein C16A3.02c	SPBC16A3.02c	sp|O42909|YBI2_SCHPO Zinc-type alcohol dehydrogenase-like protein C16A3.02c OS=Schizosaccharomyces pombe (strain 972 / ATCC 24843) OX=284812 GN=SPBC16A3.02c PE=3 SV=1	38.186	250
			14346	3	1304.1	0	0	0	1253000	13	113910	3396900	15	308810	37.3	O42914	O42914	Uncharacterized protein C16A3.08c	SPBC16A3.08c	sp|O42914|YBI8_SCHPO Uncharacterized protein C16A3.08c OS=Schizosaccharomyces pombe (strain 972 / ATCC 24843) OX=284812 GN=SPBC16A3.08c PE=1 SV=1	30.949	251
			0	0	0	0	0	0	11720	2	468.82	17183	1	687.31	7.3	O42915	O42915	Ubiquitin fusion degradation protein 1	ufd1	sp|O42915|UFD1_SCHPO Ubiquitin fusion degradation protein 1 OS=Schizosaccharomyces pombe (strain 972 / ATCC 24843) OX=284812 GN=ufd1 PE=2 SV=4	38.226	252
			0	0	0	0	0	0	1471.7	1	9.7462	15053	2	99.688	1.5	O42926	O42926	Vacuolar protein sorting-associated protein 13b	vps13b	sp|O42926|VP13B_SCHPO Vacuolar protein sorting-associated protein 13b OS=Schizosaccharomyces pombe (strain 972 / ATCC 24843) OX=284812 GN=vps13b PE=2 SV=1	354.02	253
			0	0	0	0	0	0	53008	3	1709.9	515540	7	16630	18.7	O42931	O42931	26S protease regulatory subunit 7 homolog	rpt1	sp|O42931|PRS7_SCHPO 26S proteasome regulatory subunit 7 homolog OS=Schizosaccharomyces pombe (strain 972 / ATCC 24843) OX=284812 GN=rpt1 PE=1 SV=2	48.965	254
			5111.2	1	393.17	0	0	0	26253	1	2019.5	1006	1	77.382	18.2	O42932	O42932	Cytochrome b-c1 complex subunit 6	qcr6	sp|O42932|QCR6_SCHPO Cytochrome b-c1 complex subunit 6 OS=Schizosaccharomyces pombe (strain 972 / ATCC 24843) OX=284812 GN=qcr6 PE=3 SV=1	24.307	255
			90519	1	10058	0	0	0	567980	4	63109	1837200	5	204130	33.1	O42935;P79015	O42935;P79015	60S ribosomal protein L32-B;60S ribosomal protein L32-A	rpl32b;rpl32a	sp|O42935|RL32B_SCHPO 60S ribosomal protein L32-B OS=Schizosaccharomyces pombe (strain 972 / ATCC 24843) OX=284812 GN=rpl3201 PE=3 SV=1;sp|P79015|RL32A_SCHPO 60S ribosomal protein L32-A OS=Schizosaccharomyces pombe (strain 972 / ATCC 24843) OX=284812 GN=rp	14.445	256
			0	0	0	0	0	0	1441800	2	31343	103750	6	2255.4	15.1	O42937	O42937	Probable coatomer subunit beta	sec27	sp|O42937|COPB2_SCHPO Probable coatomer subunit beta OS=Schizosaccharomyces pombe (strain 972 / ATCC 24843) OX=284812 GN=sec27 PE=3 SV=2	89.802	257
			26080	3	566.95	0	0	0	2954700	35	64233	7708400	41	167570	55	O42938	O42938	ATP-dependent 6-phosphofructokinase	pfk1	sp|O42938|PFKA_SCHPO ATP-dependent 6-phosphofructokinase OS=Schizosaccharomyces pombe (strain 972 / ATCC 24843) OX=284812 GN=pfk1 PE=1 SV=1	102.55	258
			0	0	0	0	0	0	13968	1	1396.8	57442	1	5744.2	8.8	O42940	O42940	Inorganic phosphate transport protein pho88	pho88	sp|O42940|PHO88_SCHPO SRP-independent targeting protein 3 homolog OS=Schizosaccharomyces pombe (strain 972 / ATCC 24843) OX=284812 GN=pho88 PE=3 SV=2	21.964	259
			0	0	0	0	0	0	315170	10	10868	1065200	18	36731	47.2	O42943	O42943	Uncharacterized ABC transporter ATP-binding protein C16H5.08c	SPBC16H5.08c	sp|O42943|YBP8_SCHPO Uncharacterized ABC transporter ATP-binding protein C16H5.08c OS=Schizosaccharomyces pombe (strain 972 / ATCC 24843) OX=284812 GN=SPBC16H5.08c PE=1 SV=1	69.212	260
			0	0	0	0	0	0	0	0	0	27273	3	699.31	6.2	O42947	O42947	Uncharacterized protein C16H5.12c	SPBC16H5.12c	sp|O42947|YBPC_SCHPO Uncharacterized protein C16H5.12c OS=Schizosaccharomyces pombe (strain 972 / ATCC 24843) OX=284812 GN=SPBC16H5.12c PE=1 SV=3	82.52	261
			0	0	0	0	0	0	0	0	0	7052.4	1	293.85	3.5	O42964	O42964	Transcription factor iws1	iws1	sp|O42964|IWS1_SCHPO Transcription factor iws1 OS=Schizosaccharomyces pombe (strain 972 / ATCC 24843) OX=284812 GN=iws1 PE=3 SV=1	49.114	262
			0	0	0	0	0	0	290150	5	41450	1040600	7	148650	42	O42984	O42984	40S ribosomal protein S17-A	rps17a	sp|O42984|RS17A_SCHPO 40S ribosomal protein S17-A OS=Schizosaccharomyces pombe (strain 972 / ATCC 24843) OX=284812 GN=rps1701 PE=3 SV=1	15.514	263
			0	1	0	0	0	0	136990	3	19570	332990	6	47570	53.6	O42993	O42993	Peptidyl-prolyl cis-trans isomerase	fkh1	sp|O42993|FKBP_SCHPO Peptidyl-prolyl cis-trans isomerase OS=Schizosaccharomyces pombe (strain 972 / ATCC 24843) OX=284812 GN=fkh1 PE=3 SV=1	12.043	264
			0	0	0	0	0	0	8291.1	1	4145.5	5299	1	2649.5	19.2	O42999	O42999	Mitochondrial import receptor subunit tom7	tom7	sp|O42999|TOM7_SCHPO Mitochondrial import receptor subunit tom7 OS=Schizosaccharomyces pombe (strain 972 / ATCC 24843) OX=284812 GN=tom7 PE=3 SV=2	6.0391	265
			0	0	0	0	0	0	0	0	0	4159	1	831.81	17.6	O43002	O43002	Protein transport protein sec61 subunit beta	sbh1	sp|O43002|SC61B_SCHPO Protein transport protein sec61 subunit beta OS=Schizosaccharomyces pombe (strain 972 / ATCC 24843) OX=284812 GN=sbh1 PE=3 SV=1	10.444	266
			285570	4	28557	41020	2	4102	212410	4	21241	451620	3	45162	38.9	O43003	O43003	Protein mmf1, mitochondrial	mmf1	sp|O43003|MMF1_SCHPO Protein mmf1, mitochondrial OS=Schizosaccharomyces pombe (strain 972 / ATCC 24843) OX=284812 GN=mmf1 PE=3 SV=1	17.543	267
			0	0	0	0	0	0	0	0	0	6912.5	2	132.93	3.5	O43007	O43007	C-1-tetrahydrofolate synthase, mitochondrial;Methylenetetrahydrofolate dehydrogenase;Methenyltetrahydrofolate cyclohydrolase;Formyltetrahydrofolate synthetase	ade9	sp|O43007|C1TM_SCHPO C-1-tetrahydrofolate synthase, mitochondrial OS=Schizosaccharomyces pombe (strain 972 / ATCC 24843) OX=284812 GN=ade9 PE=3 SV=3	105.76	268
			0	0	0	0	0	0	8984.8	2	359.39	89231	4	3569.2	11.4	O43010	O43010	Glycylpeptide N-tetradecanoyltransferase	nmt1	sp|O43010|NMT_SCHPO Glycylpeptide N-tetradecanoyltransferase OS=Schizosaccharomyces pombe (strain 972 / ATCC 24843) OX=284812 GN=nmt1 PE=1 SV=1	53.696	269
			0	0	0	0	0	0	113980	4	3561.9	368750	12	11523	28.1	O43011	O43011	Histidine--tRNA ligase, mitochondrial	hts1	sp|O43011|SYH_SCHPO Histidine--tRNA ligase, mitochondrial OS=Schizosaccharomyces pombe (strain 972 / ATCC 24843) OX=284812 GN=hts1 PE=1 SV=2	63.304	270
			0	0	0	0	0	0	32741	2	1925.9	77478	4	4557.5	17.2	O43014	O43014	Mannose-6-phosphate isomerase	pmi40	sp|O43014|MPI_SCHPO Mannose-6-phosphate isomerase OS=Schizosaccharomyces pombe (strain 972 / ATCC 24843) OX=284812 GN=pmi40 PE=3 SV=1	45.59	271
			0	0	0	0	0	0	71991	5	4799.4	115670	3	7711.2	27	O43021	O43021	Oxysterol-binding protein homolog C354.07c	SPBC354.07c	sp|O43021|YGV7_SCHPO Oxysterol-binding protein homolog C354.07c OS=Schizosaccharomyces pombe (strain 972 / ATCC 24843) OX=284812 GN=SPBC354.07c PE=3 SV=4	45.066	272
			0	0	0	0	0	0	5111.9	1	170.4	189110	5	6303.8	10.6	O43024	O43024	CUE domain-containing protein C354.10	SPBC354.10	sp|O43024|YGVA_SCHPO CUE domain-containing protein C354.10 OS=Schizosaccharomyces pombe (strain 972 / ATCC 24843) OX=284812 GN=SPBC354.10 PE=1 SV=1	100.13	273
			10996	18	523.64	0	3	0	223970	16	10665	569510	23	27119	70.4	O43026	O43026	Glyceraldehyde-3-phosphate dehydrogenase 2	gpd3	sp|O43026|G3P2_SCHPO Glyceraldehyde-3-phosphate dehydrogenase 2 OS=Schizosaccharomyces pombe (strain 972 / ATCC 24843) OX=284812 GN=gpd3 PE=1 SV=1	35.674	274
			0	0	0	0	0	0	6633	1	174.55	1927.7	1	50.729	1.9	O43027	O43027	Probable Rho-GTPase-activating protein 6	rga6	sp|O43027|RGA6_SCHPO Probable Rho-GTPase-activating protein 6 OS=Schizosaccharomyces pombe (strain 972 / ATCC 24843) OX=284812 GN=rga6 PE=1 SV=1	80.776	275
			0	0	0	0	0	0	10423	1	372.26	28024	2	1000.9	7.3	O43028	O43028	Vacuolar protein 8	vac8	sp|O43028|VAC8_SCHPO Vacuolar protein 8 OS=Schizosaccharomyces pombe (strain 972 / ATCC 24843) OX=284812 GN=vac8 PE=1 SV=4	60.232	276
			0	0	0	0	0	0	0	0	0	87792	3	4620.6	11.8	O43030	O43030	Hsp70 nucleotide exchange factor fes1	fes1	sp|O43030|FES1_SCHPO Hsp70 nucleotide exchange factor fes1 OS=Schizosaccharomyces pombe (strain 972 / ATCC 24843) OX=284812 GN=fes1 PE=1 SV=1	32.744	277
			0	0	0	0	0	0	8537.6	1	258.72	52681	4	1596.4	12.2	O43032	O43032	Signal recognition particle receptor subunit alpha homolog	srp101	sp|O43032|SRPR_SCHPO Signal recognition particle receptor subunit alpha homolog OS=Schizosaccharomyces pombe (strain 972 / ATCC 24843) OX=284812 GN=srp101 PE=3 SV=1	61.077	278
			0	0	0	0	0	0	0	0	0	11887	1	742.96	3.1	O43042	O43042	54S ribosomal protein L3, mitochondrial	mrpl3	sp|O43042|RM03_SCHPO 54S ribosomal protein L3, mitochondrial OS=Schizosaccharomyces pombe (strain 972 / ATCC 24843) OX=284812 GN=mrpl3 PE=3 SV=1	37.195	279
			0	0	0	0	0	0	30169	2	3016.9	61292	3	6129.2	20.6	O43047	O43047	GrpE protein homolog, mitochondrial	mge1	sp|O43047|GRPE_SCHPO GrpE protein homolog, mitochondrial OS=Schizosaccharomyces pombe (strain 972 / ATCC 24843) OX=284812 GN=mge1 PE=3 SV=1	25.334	280
			0	0	0	0	0	0	8525.6	1	198.27	0	0	0	1.4	O43048	O43048	TBC domain-containing protein C215.01		sp|O43048|YH51_SCHPO TBC domain-containing protein C215.01 OS=Schizosaccharomyces pombe (strain 972 / ATCC 24843) OX=284812 GN=SPBC215.01 PE=3 SV=4	95.005	281
			0	0	0	0	0	0	23647	2	1028.1	81587	2	3547.3	7.4	O43049	O43049	Serine/threonine-protein phosphatase T	ppt1	sp|O43049|PPT1_SCHPO Serine/threonine-protein phosphatase T OS=Schizosaccharomyces pombe (strain 972 / ATCC 24843) OX=284812 GN=ppt1 PE=3 SV=2	53.29	282
			0	0	0	0	0	0	28048	1	2003.5	174580	3	12470	11.2	O43050	O43050	Sterol-4-alpha-carboxylate 3-dehydrogenase, decarboxylating	erg26	sp|O43050|ERG26_SCHPO Sterol-4-alpha-carboxylate 3-dehydrogenase, decarboxylating OS=Schizosaccharomyces pombe (strain 972 / ATCC 24843) OX=284812 GN=erg26 PE=3 SV=1	38.317	283
			0	0	0	0	0	0	31326	1	1842.7	97360	2	5727.1	6.5	O43056	O43056	Probable homoserine kinase	SPBC4C3.03	sp|O43056|KHSE_SCHPO Probable homoserine kinase OS=Schizosaccharomyces pombe (strain 972 / ATCC 24843) OX=284812 GN=SPBC4C3.03 PE=3 SV=1	36.608	284
			0	0	0	0	0	0	63942	2	1487	77136	3	1793.9	6.8	O43059	O43059	Cytoskeletal protein syp1	syp1	sp|O43059|SYP1_SCHPO Cytoskeletal protein syp1 OS=Schizosaccharomyces pombe (strain 972 / ATCC 24843) OX=284812 GN=syp1 PE=1 SV=1	90.756	285
			0	0	0	0	0	0	47929	3	3686.8	273350	8	21027	39.1	O43060	O43060	Eukaryotic translation initiation factor 3 subunit F	eif3f	sp|O43060|EIF3F_SCHPO Eukaryotic translation initiation factor 3 subunit F OS=Schizosaccharomyces pombe (strain 972 / ATCC 24843) OX=284812 GN=eif3f PE=1 SV=1	33.251	286
			0	0	0	0	0	0	70835	4	4722.3	145750	3	9716.5	34.5	O43063	O43063	Probable proteasome subunit beta type-1	pre3	sp|O43063|PSB1_SCHPO Probable proteasome subunit beta type-1 OS=Schizosaccharomyces pombe (strain 972 / ATCC 24843) OX=284812 GN=pre3 PE=3 SV=1	24.564	287
			0	0	0	0	0	0	0	0	0	33084	4	870.62	7	O43079	O43079	AP-1 complex subunit beta-1	apl2	sp|O43079|AP1B1_SCHPO AP-1 complex subunit beta-1 OS=Schizosaccharomyces pombe (strain 972 / ATCC 24843) OX=284812 GN=apl2 PE=1 SV=1	76.681	288
			0	0	0	0	0	0	0	0	0	30972	2	1068	3.6	O43090	O43090	Probable NADH-ubiquinone oxidoreductase C947.15c, mitochondrial	SPBC947.15c	sp|O43090|NDH2_SCHPO Probable NADH-ubiquinone oxidoreductase C947.15c, mitochondrial OS=Schizosaccharomyces pombe (strain 972 / ATCC 24843) OX=284812 GN=SPBC947.15c PE=3 SV=1	60.78	289
			0	0	0	0	0	0	0	0	0	31087	1	1636.1	6	O59667	O59667	Histidine biosynthesis bifunctional protein his7;Phosphoribosyl-AMP cyclohydrolase;Phosphoribosyl-ATP pyrophosphatase	his7	sp|O59667|HIS2_SCHPO Histidine biosynthesis bifunctional protein his7 OS=Schizosaccharomyces pombe (strain 972 / ATCC 24843) OX=284812 GN=his7 PE=3 SV=1	46.182	290
			0	0	0	0	0	0	0	0	0	29155	3	809.86	5.7	O59672	O59672	Uncharacterized ABC transporter ATP-binding protein C29A3.09c	SPBC29A3.09c	sp|O59672|YB89_SCHPO Uncharacterized ABC transporter ATP-binding protein C29A3.09c OS=Schizosaccharomyces pombe (strain 972 / ATCC 24843) OX=284812 GN=SPBC29A3.09c PE=3 SV=1	83.761	291
			78246	3	7113.3	0	0	0	658640	9	59876	3212900	16	292080	64.6	O59675	O59675	40S ribosomal protein S9-B	rps9b	sp|O59675|RS9B_SCHPO 40S ribosomal protein S9-B OS=Schizosaccharomyces pombe (strain 972 / ATCC 24843) OX=284812 GN=rps902 PE=1 SV=3	22.245	292
			0	0	0	0	0	0	0	0	0	16426	2	2737.7	15.7	O59678	O59678	Ribosome biogenesis regulatory protein homolog	SPBC29A3.16	sp|O59678|RRS1_SCHPO Ribosome biogenesis regulatory protein homolog OS=Schizosaccharomyces pombe (strain 972 / ATCC 24843) OX=284812 GN=SPBC29A3.16 PE=1 SV=1	19.044	293
			14161	2	1287.4	0	0	0	41416	1	3765.1	51694	1	4699.4	6.5	O59680	O59680	Cytochrome c1, heme protein, mitochondrial	cyt1	sp|O59680|CY1_SCHPO Cytochrome c1, heme protein, mitochondrial OS=Schizosaccharomyces pombe (strain 972 / ATCC 24843) OX=284812 GN=cyt1 PE=3 SV=1	34.34	294
			0	0	0	0	0	0	36030	1	2251.9	43717	3	2732.3	19	O59681	O59681	Uncharacterized protein C18E5.01		sp|O59681|YBS1_SCHPO Uncharacterized protein C18E5.01 OS=Schizosaccharomyces pombe (strain 972 / ATCC 24843) OX=284812 GN=SPBC18E5.01 PE=3 SV=1	38.22	295
			0	0	0	0	0	0	97765	6	4073.6	398450	12	16602	27.5	O59682	O59682	Serine palmitoyltransferase 1	lcb1	sp|O59682|LCB1_SCHPO Serine palmitoyltransferase 1 OS=Schizosaccharomyces pombe (strain 972 / ATCC 24843) OX=284812 GN=lcb1 PE=3 SV=1	57.468	296
			0	0	0	0	0	0	14529	1	345.92	0	0	0	1.2	O59683	O59683	Translation initiation factor IF-2, mitochondrial		sp|O59683|IF2M_SCHPO Translation initiation factor IF-2, mitochondrial OS=Schizosaccharomyces pombe (strain 972 / ATCC 24843) OX=284812 GN=SPBC1271.15c PE=3 SV=1	75.61	297
			0	0	0	0	0	0	0	0	0	25628	3	1830.6	4.6	O59700	O59700	Uncharacterized transporter C36.03c	SPBC36.03c	sp|O59700|YN43_SCHPO Uncharacterized transporter C36.03c OS=Schizosaccharomyces pombe (strain 972 / ATCC 24843) OX=284812 GN=SPBC36.03c PE=3 SV=1	59.169	298
			0	0	0	0	0	0	40825	3	2551.5	146380	6	9148.8	29.9	O59701	O59701	Cysteine synthase 1	cys11	sp|O59701|CYSK_SCHPO Cysteine synthase 1 OS=Schizosaccharomyces pombe (strain 972 / ATCC 24843) OX=284812 GN=cys11 PE=1 SV=1	37.853	299
			40371	2	1682.1	0	0	0	1675900	15	69828	4123500	17	171810	56.7	O59711	O59711	Saccharopine dehydrogenase [NADP(+), L-glutamate-forming]	lys9	sp|O59711|LYS9_SCHPO Saccharopine dehydrogenase [NADP(+), L-glutamate-forming] OS=Schizosaccharomyces pombe (strain 972 / ATCC 24843) OX=284812 GN=lys9 PE=3 SV=1	49.938	300
			0	0	0	0	0	0	0	0	0	35723	2	4465.4	18.4	O59727	O59727	Protein PBDC1 homolog	SPBC3E7.07c	sp|O59727|YHX7_SCHPO Protein PBDC1 homolog OS=Schizosaccharomyces pombe (strain 972 / ATCC 24843) OX=284812 GN=SPBC3E7.07c PE=3 SV=1	17.405	301
			0	0	0	0	0	0	62736	4	2987.4	110110	4	5243.1	26.9	O59730	O59730	Methionine aminopeptidase 1	fma1	sp|O59730|MAP1_SCHPO Methionine aminopeptidase 1 OS=Schizosaccharomyces pombe (strain 972 / ATCC 24843) OX=284812 GN=fma1 PE=1 SV=1	42.139	302
			0	0	0	0	0	0	0	0	0	12174	1	2434.7	12.8	O59734	O59734	Small nuclear ribonucleoprotein F	smf1	sp|O59734|RUXF_SCHPO Small nuclear ribonucleoprotein F OS=Schizosaccharomyces pombe (strain 972 / ATCC 24843) OX=284812 GN=smf1 PE=1 SV=1	8.66	303
			0	0	0	0	0	0	0	0	0	7529.4	1	470.59	4.7	O59735	O59735	Sphingosine N-acyltransferase lac1	lac1	sp|O59735|LAC1_SCHPO Sphingosine N-acyltransferase lac1 OS=Schizosaccharomyces pombe (strain 972 / ATCC 24843) OX=284812 GN=lac1 PE=1 SV=2	45.335	304
			0	0	0	0	0	0	50182	3	1730.4	540930	10	18653	30	O59736	O59736	2-isopropylmalate synthase	leu3	sp|O59736|LEU1_SCHPO 2-isopropylmalate synthase OS=Schizosaccharomyces pombe (strain 972 / ATCC 24843) OX=284812 GN=leu3 PE=3 SV=2	64.041	305
			0	0	0	0	0	0	8552.6	1	712.71	39853	2	3321.1	15.5	O59739	O59739	BAG family molecular chaperone regulator 1B	bag102	sp|O59739|BAG1B_SCHPO BAG family molecular chaperone regulator 1B OS=Schizosaccharomyces pombe (strain 972 / ATCC 24843) OX=284812 GN=bag102 PE=1 SV=1	23.325	306
			11775	1	784.99	0	0	0	126250	6	8416.4	530450	11	35364	57.4	O59743	O59743	Uncharacterized protein C530.07c	SPBC530.07c	sp|O59743|YN27_SCHPO Uncharacterized protein C530.07c OS=Schizosaccharomyces pombe (strain 972 / ATCC 24843) OX=284812 GN=SPBC530.07c PE=4 SV=1	27.839	307
			0	0	0	0	0	0	0	0	0	17930	1	1494.2	5.9	O59760	O59760	Putative uncharacterized hydrolase C1020.07	SPCC1020.07	sp|O59760|YJM7_SCHPO Putative uncharacterized hydrolase C1020.07 OS=Schizosaccharomyces pombe (strain 972 / ATCC 24843) OX=284812 GN=SPCC1020.07 PE=3 SV=1	26.496	308
			0	0	0	0	0	0	7602.9	1	223.61	7377.6	1	216.99	4.7	O59761	O59761	S-adenosyl-L-methionine-dependent tRNA 4-demethylwyosine synthase	tyw1	sp|O59761|TYW1_SCHPO S-adenosyl-L-methionine-dependent tRNA 4-demethylwyosine synthase OS=Schizosaccharomyces pombe (strain 972 / ATCC 24843) OX=284812 GN=tyw1 PE=3 SV=1	78.187	309
			0	0	0	0	0	0	66120	2	6010.9	133890	6	12171	27.3	O59770	O59770	Probable proteasome subunit alpha type-7	pre10	sp|O59770|PSA7_SCHPO Probable proteasome subunit alpha type-7 OS=Schizosaccharomyces pombe (strain 972 / ATCC 24843) OX=284812 GN=pre10 PE=1 SV=1	28.031	310
			0	0	0	0	0	0	14466	2	1607.4	47893	2	5321.4	15.7	O59771	O59771	Uridylate kinase	SPCC1795.05c	sp|O59771|KCY_SCHPO Uridylate kinase OS=Schizosaccharomyces pombe (strain 972 / ATCC 24843) OX=284812 GN=SPCC1795.05c PE=3 SV=1	21.716	311
			0	0	0	0	0	0	0	0	0	9895.1	1	659.67	3	O59778	O59778	Biotin synthase	bio2	sp|O59778|BIOB_SCHPO Biotin synthase OS=Schizosaccharomyces pombe (strain 972 / ATCC 24843) OX=284812 GN=bio2 PE=1 SV=1	40.65	312
			0	0	0	0	0	0	1053.1	1	175.52	31994	2	5332.3	6.7	O59779	O59779	Uncharacterized protein C1235.01		sp|O59779|YCY1_SCHPO Uncharacterized protein C1235.01 OS=Schizosaccharomyces pombe (strain 972 / ATCC 24843) OX=284812 GN=SPCC1235.01 PE=4 SV=1	69.695	313
			0	0	0	0	0	0	7485.4	1	213.87	49184	2	1405.3	4.5	O59787	O59787	Signal recognition particle subunit srp72	srp72	sp|O59787|SRP72_SCHPO Signal recognition particle subunit srp72 OS=Schizosaccharomyces pombe (strain 972 / ATCC 24843) OX=284812 GN=srp72 PE=3 SV=1	63.28	314
			0	0	0	0	0	0	0	0	0	22018	1	1295.1	4.3	O59791	O59791	Serine racemase	SRR	sp|O59791|SRR_SCHPO Serine racemase OS=Schizosaccharomyces pombe (strain 972 / ATCC 24843) OX=284812 GN=SRR PE=1 SV=1	35.048	315
			2927.8	1	292.78	0	0	0	827150	11	82715	3383200	10	338320	63.6	O59794	O59794	60S ribosomal protein L17-B	rpl17b	sp|O59794|RL17B_SCHPO 60S ribosomal protein L17-B OS=Schizosaccharomyces pombe (strain 972 / ATCC 24843) OX=284812 GN=rpl1702 PE=3 SV=1	20.827	316
			0	0	0	0	0	0	67378	4	4211.1	242790	6	15174	26.7	O59797	O59797	Putative nucleosome assembly protein C364.06	SPCC364.06	sp|O59797|YCO6_SCHPO Putative nucleosome assembly protein C364.06 OS=Schizosaccharomyces pombe (strain 972 / ATCC 24843) OX=284812 GN=SPCC364.06 PE=1 SV=1	44.347	317
			16973	1	2828.8	0	0	0	197490	4	32914	343330	6	57221	80.8	O59804	O59804	10 kDa heat shock protein, mitochondrial	hsp10	sp|O59804|CH10_SCHPO 10 kDa heat shock protein, mitochondrial OS=Schizosaccharomyces pombe (strain 972 / ATCC 24843) OX=284812 GN=hsp10 PE=1 SV=1	11.282	318
			0	0	0	0	0	0	10435	2	149.07	523260	16	7475.1	16.3	O59810	O59810	Vigilin 1	vgl1	sp|O59810|VGL1_SCHPO Vigilin 1 OS=Schizosaccharomyces pombe (strain 972 / ATCC 24843) OX=284812 GN=vgl1 PE=1 SV=2	142.61	319
			0	0	0	0	0	0	0	0	0	16361	1	908.93	2.6	O59811	O59811	Cytoplasmic 60S subunit biogenesis factor SPCC550.15c	SPCC550.15c	sp|O59811|REI1_SCHPO Cytoplasmic 60S subunit biogenesis factor SPCC550.15c OS=Schizosaccharomyces pombe (strain 972 / ATCC 24843) OX=284812 GN=SPCC550.15c PE=1 SV=1	52.25	320
			0	0	0	0	0	0	0	0	0	48161	3	2293.4	9.6	O59813	O59813	Uncharacterized amino-acid permease C794.03	SPCC794.03	sp|O59813|YCT3_SCHPO Uncharacterized amino-acid permease C794.03 OS=Schizosaccharomyces pombe (strain 972 / ATCC 24843) OX=284812 GN=SPCC794.03 PE=2 SV=1	60.857	321
			0	0	0	0	0	0	49023	2	1815.7	207560	3	7687.3	9.3	O59816	O59816	Dihydrolipoyllysine-residue acetyltransferase component of pyruvate dehydrogenase complex, mitochondrial	lat1	sp|O59816|ODP2_SCHPO Dihydrolipoyllysine-residue acetyltransferase component of pyruvate dehydrogenase complex, mitochondrial OS=Schizosaccharomyces pombe (strain 972 / ATCC 24843) OX=284812 GN=lat1 PE=3 SV=1	52.06	322
			0	0	0	0	0	0	0	0	0	12740	1	909.97	3.9	O59823	O59823	V-type proton ATPase subunit D	vma8	sp|O59823|VATD_SCHPO V-type proton ATPase subunit D OS=Schizosaccharomyces pombe (strain 972 / ATCC 24843) OX=284812 GN=vma8 PE=1 SV=1	32.219	323
			0	0	0	0	0	0	0	0	0	136030	6	5914.2	22.4	O59826	O59826	Putative voltage-gated potassium channel subunit beta	SPCC965.06	sp|O59826|KCAB_SCHPO Putative voltage-gated potassium channel subunit beta OS=Schizosaccharomyces pombe (strain 972 / ATCC 24843) OX=284812 GN=SPCC965.06 PE=3 SV=1	38.43	324
			59505	5	1451.4	0	0	0	2679300	32	65348	5034800	35	122800	52.4	O59838	O59838	Heat shock protein homolog pss1	pss1	sp|O59838|HSP7F_SCHPO Heat shock protein homolog pss1 OS=Schizosaccharomyces pombe (strain 972 / ATCC 24843) OX=284812 GN=pss1 PE=1 SV=2	80.374	325
			1095200	20	32213	22810	2	670.87	12204000	49	358930	24814000	53	729820	65.5	O59855	O59855	Probable heat shock protein ssa2	ssa2	sp|O59855|HSP72_SCHPO Probable heat shock protein ssa2 OS=Schizosaccharomyces pombe (strain 972 / ATCC 24843) OX=284812 GN=ssa2 PE=1 SV=3	70.232	326
			75675	2	7567.5	0	0	0	255970	4	25597	327370	4	32737	39.9	O59858	O59858	Glutathione peroxidase	gpx1	sp|O59858|GPX1_SCHPO Glutathione peroxidase-like peroxiredoxin gpx1 OS=Schizosaccharomyces pombe (strain 972 / ATCC 24843) OX=284812 GN=gpx1 PE=1 SV=1	18.06	327
			6590.5	2	1098.4	0	0	0	340700	7	56784	2092600	9	348770	49.3	O59865	O59865	40S ribosomal protein S24-B	rps24b	sp|O59865|RS24B_SCHPO 40S ribosomal protein S24-B OS=Schizosaccharomyces pombe (strain 972 / ATCC 24843) OX=284812 GN=rps2402 PE=2 SV=3	15.539	328
			0	0	0	0	0	0	21991	1	999.59	170500	4	7750.2	14.4	O59866	O59866	Dolichyl-diphosphooligosaccharide--protein glycosyltransferase subunit wbp1	wbp1	sp|O59866|OSTB_SCHPO Dolichyl-diphosphooligosaccharide--protein glycosyltransferase subunit wbp1 OS=Schizosaccharomyces pombe (strain 972 / ATCC 24843) OX=284812 GN=wbp1 PE=2 SV=2	48.898	329
			0	0	0	0	0	0	148640	6	3911.6	488590	14	12858	32.7	O59945	O59945	Fimbrin	fim1	sp|O59945|FIMB_SCHPO Fimbrin OS=Schizosaccharomyces pombe (strain 972 / ATCC 24843) OX=284812 GN=fim1 PE=1 SV=1	68.617	330
			0	0	0	0	0	0	8860.9	1	268.51	15110	1	457.88	5.4	O60059	O60059	Pumilio domain-containing protein C56F2.08c	SPBC56F2.08c	sp|O60059|YG58_SCHPO Pumilio domain-containing protein C56F2.08c OS=Schizosaccharomyces pombe (strain 972 / ATCC 24843) OX=284812 GN=SPBC56F2.08c PE=1 SV=1	72.822	331
			0	0	0	0	0	0	25312	3	1489	140990	4	8293.6	17.8	O60060	O60060	Carbamoyl-phosphate synthase arginine-specific small chain	arg5	sp|O60060|CARA_SCHPO Carbamoyl-phosphate synthase arginine-specific small chain OS=Schizosaccharomyces pombe (strain 972 / ATCC 24843) OX=284812 GN=arg5 PE=3 SV=1	45.661	332
			0	0	0	0	0	0	0	0	0	35958	1	1563.4	1.8	O60062	O60062	Homoserine O-acetyltransferase	met6	sp|O60062|MET2_SCHPO Homoserine O-acetyltransferase OS=Schizosaccharomyces pombe (strain 972 / ATCC 24843) OX=284812 GN=met6 PE=3 SV=1	54.31	333
			0	0	0	0	0	0	271430	9	12338	746710	11	33941	46.6	O60064	O60064	Probable mannose-1-phosphate guanyltransferase	SPBC13G1.02	sp|O60064|YBB2_SCHPO Probable mannose-1-phosphate guanyltransferase OS=Schizosaccharomyces pombe (strain 972 / ATCC 24843) OX=284812 GN=SPBC13G1.02 PE=3 SV=1	46.096	334
			0	0	0	0	0	0	0	0	0	16035	1	552.93	3.1	O60071	O60071	Uncharacterized protein C13G1.09	SPBC13G1.09	sp|O60071|YBB9_SCHPO Uncharacterized protein C13G1.09 OS=Schizosaccharomyces pombe (strain 972 / ATCC 24843) OX=284812 GN=SPBC13G1.09 PE=1 SV=1	51.365	335
			0	0	0	0	0	0	6773.2	1	483.8	80111	4	5722.2	27.4	O60073	O60073	Synaptobrevin homolog ykt6	ykt6	sp|O60073|YKT6_SCHPO Synaptobrevin homolog ykt6 OS=Schizosaccharomyces pombe (strain 972 / ATCC 24843) OX=284812 GN=ykt6 PE=3 SV=1	22.651	336
			0	0	0	0	0	0	0	0	0	12760	1	490.78	2.6	O60078	O60078	Probable prephenate dehydrogenase [NADP(+)]	tyr1	sp|O60078|TYR1_SCHPO Probable prephenate dehydrogenase [NADP(+)] OS=Schizosaccharomyces pombe (strain 972 / ATCC 24843) OX=284812 GN=tyr1 PE=2 SV=1	48.905	337
			0	0	0	0	0	0	3823.9	1	78.04	46874	3	956.62	3.1	O60079	O60079	Probable ubiquitin carboxyl-terminal hydrolase 12	ubp12	sp|O60079|UBP12_SCHPO Probable ubiquitin carboxyl-terminal hydrolase 12 OS=Schizosaccharomyces pombe (strain 972 / ATCC 24843) OX=284812 GN=ubp12 PE=1 SV=1	111.97	338
			0	0	0	0	0	0	12052	1	463.53	24607	3	946.43	11.5	O60084	O60084	Mitochondrial import inner membrane translocase subunit tim44	tim44	sp|O60084|TIM44_SCHPO Mitochondrial import inner membrane translocase subunit tim44 OS=Schizosaccharomyces pombe (strain 972 / ATCC 24843) OX=284812 GN=tim44 PE=3 SV=1	48.549	339
			0	0	0	0	0	0	188940	6	8997.2	603360	10	28731	40.8	O60085	O60085	Methionine aminopeptidase 2	fma2	sp|O60085|MAP2_SCHPO Methionine aminopeptidase 2 OS=Schizosaccharomyces pombe (strain 972 / ATCC 24843) OX=284812 GN=fma2 PE=3 SV=1	47.271	340
			0	0	0	0	0	0	141200	4	8305.7	369740	4	21749	21.1	O60086	O60086	Probable acetolactate synthase small subunit	SPBC14C8.04	sp|O60086|ILV6_SCHPO Probable acetolactate synthase small subunit OS=Schizosaccharomyces pombe (strain 972 / ATCC 24843) OX=284812 GN=SPBC14C8.04 PE=1 SV=2	31.834	341
			0	0	0	0	0	0	2798.1	1	51.816	225310	6	4172.5	11	O60100	O60100	Probable importin subunit beta-4	kap123	sp|O60100|IMB4_SCHPO Probable importin subunit beta-4 OS=Schizosaccharomyces pombe (strain 972 / ATCC 24843) OX=284812 GN=kap123 PE=3 SV=1	117.83	342
			7899600	33	282130	261950	7	9355.5	14044000	37	501580	26015000	50	929110	97.6	O60101	O60101	Phosphoglycerate kinase	pgk1	sp|O60101|PGK_SCHPO Phosphoglycerate kinase OS=Schizosaccharomyces pombe (strain 972 / ATCC 24843) OX=284812 GN=pgk1 PE=1 SV=1	43.963	343
			0	0	0	0	0	0	65249	4	2039	261910	9	8184.6	22.8	O60102	O60102	Translation initiation factor rli1	rli1	sp|O60102|RLI1_SCHPO Translation initiation factor rli1 OS=Schizosaccharomyces pombe (strain 972 / ATCC 24843) OX=284812 GN=rli1 PE=3 SV=1	66.589	344
			0	0	0	0	0	0	147820	4	5685.4	611690	14	23527	41.5	O60105	O60105	Adenylosuccinate lyase	ade8	sp|O60105|PUR8_SCHPO Adenylosuccinate lyase OS=Schizosaccharomyces pombe (strain 972 / ATCC 24843) OX=284812 GN=ade8 PE=3 SV=1	54.307	345
			0	0	0	0	0	0	0	0	0	6519.8	1	407.49	10.7	O60116	O60116	Putative ribokinase	SPBC16G5.02c	sp|O60116|RBSK_SCHPO Ribokinase OS=Schizosaccharomyces pombe (strain 972 / ATCC 24843) OX=284812 GN=rbk1 PE=3 SV=1	33.25	346
			13641	2	909.42	0	0	0	315550	5	21036	529730	7	35316	25.6	O60119	O60119	Vesicle-associated membrane protein-associated protein C16G5.05c	SPBC16G5.05c	sp|O60119|SCS2_SCHPO Vesicle-associated membrane protein-associated protein scs2 OS=Schizosaccharomyces pombe (strain 972 / ATCC 24843) OX=284812 GN=scs2 PE=1 SV=1	41.234	347
			0	0	0	0	0	0	0	0	0	38450	1	2746.4	9	O60122	O60122	Anthranilate phosphoribosyltransferase	trp4	sp|O60122|TRPD_SCHPO Anthranilate phosphoribosyltransferase OS=Schizosaccharomyces pombe (strain 972 / ATCC 24843) OX=284812 GN=trp4 PE=3 SV=1	37.556	348
			0	0	0	0	0	0	0	0	0	2863	1	318.11	6.2	O60125	O60125	BAG family molecular chaperone regulator 1A	bag101	sp|O60125|BAG1A_SCHPO BAG family molecular chaperone regulator 1A OS=Schizosaccharomyces pombe (strain 972 / ATCC 24843) OX=284812 GN=bag101 PE=2 SV=1	22.205	349
			0	0	0	0	0	0	853540	12	50208	3048600	15	179330	55.4	O60128	O60128	40S ribosomal protein S3	rps3	sp|O60128|RS3_SCHPO 40S ribosomal protein S3 OS=Schizosaccharomyces pombe (strain 972 / ATCC 24843) OX=284812 GN=rps3 PE=1 SV=1	27.553	350
			0	0	0	0	0	0	945350	20	35013	1417500	21	52499	42.3	O60135	O60135	Long-chain-fatty-acid--CoA ligase 1	lcf1	sp|O60135|LCF1_SCHPO Long-chain-fatty-acid--CoA ligase 1 OS=Schizosaccharomyces pombe (strain 972 / ATCC 24843) OX=284812 GN=lcf1 PE=3 SV=1	75.965	351
			8269.6	2	590.69	0	0	0	776670	16	55477	2401000	21	171500	67.7	O60143	O60143	60S ribosomal protein L7-C	rpl7c	sp|O60143|RL7C_SCHPO 60S ribosomal protein L7-C OS=Schizosaccharomyces pombe (strain 972 / ATCC 24843) OX=284812 GN=rpl701 PE=1 SV=1	28.73	352
			0	0	0	0	0	0	697720	17	16612	1891800	29	45042	54.3	O60155	O60155	Putative proline--tRNA ligase C19C7.06	prs1	sp|O60155|PRS1_SCHPO Putative proline--tRNA ligase C19C7.06 OS=Schizosaccharomyces pombe (strain 972 / ATCC 24843) OX=284812 GN=prs1 PE=3 SV=1	78.874	353
			0	0	0	0	0	0	1509900	1	83885	109300	1	6072.3	10.9	O60156	O60156	Probable tRNA-splicing endonuclease subunit sen34	sen34	sp|O60156|SEN34_SCHPO Probable tRNA-splicing endonuclease subunit sen34 OS=Schizosaccharomyces pombe (strain 972 / ATCC 24843) OX=284812 GN=sen34 PE=3 SV=1	32.807	354
			0	0	0	0	0	0	1866.5	1	71.79	5969.3	2	229.59	12.3	O60158	O60158	Bouquet formation protein 4	bqt4	sp|O60158|BQT4_SCHPO Bouquet formation protein 4 OS=Schizosaccharomyces pombe (strain 972 / ATCC 24843) OX=284812 GN=bqt4 PE=1 SV=2	47.826	355
			0	0	0	0	0	0	44513	2	1435.9	276020	8	8904	15.4	O60162	O60162	Uncharacterized protein C19F5.03	SPBC19F5.03	sp|O60162|YG23_SCHPO Uncharacterized protein C19F5.03 OS=Schizosaccharomyces pombe (strain 972 / ATCC 24843) OX=284812 GN=SPBC19F5.03 PE=1 SV=1	68.712	356
			0	0	0	0	0	0	232050	7	8287.4	406290	8	14511	33.3	O60163	O60163	Probable aspartokinase	SPBC19F5.04	sp|O60163|AK_SCHPO Probable aspartokinase OS=Schizosaccharomyces pombe (strain 972 / ATCC 24843) OX=284812 GN=SPBC19F5.04 PE=1 SV=1	56.812	357
			0	0	0	0	0	0	0	0	0	18111	2	696.59	3.5	O60164	O60164	Pescadillo homolog	ppp1	sp|O60164|PESC_SCHPO Pescadillo homolog OS=Schizosaccharomyces pombe (strain 972 / ATCC 24843) OX=284812 GN=ppp1 PE=3 SV=1	69.188	358
			0	0	0	0	0	0	0	0	0	13642	1	2273.7	6.5	O60171	O60171	Transcription initiation factor TFIID subunit 10	taf10	sp|O60171|TAF10_SCHPO Transcription initiation factor TFIID subunit 10 OS=Schizosaccharomyces pombe (strain 972 / ATCC 24843) OX=284812 GN=taf10 PE=3 SV=1	23.526	359
			0	0	0	0	0	0	0	0	0	56616	1	3145.4	1.7	O60172	O60172	Thiamine-repressible acid phosphatase SPBC21H7.03c	SPBC21H7.03c	sp|O60172|PPA3_SCHPO Thiamine-repressible acid phosphatase SPBC21H7.03c OS=Schizosaccharomyces pombe (strain 972 / ATCC 24843) OX=284812 GN=SPBC21H7.03c PE=2 SV=1	52.758	360
			0	0	0	0	0	0	681230	1	8109.8	437430	1	5207.5	0.5	O60179	O60179	U3 small nucleolar RNA-associated protein 10	utp10	sp|O60179|UTP10_SCHPO U3 small nucleolar RNA-associated protein 10 OS=Schizosaccharomyces pombe (strain 972 / ATCC 24843) OX=284812 GN=utp10 PE=3 SV=1	186.41	361
			0	0	0	0	0	0	2079.5	1	103.98	65854	3	3292.7	11	O60180	O60180	Probable metalloprotease arx1	arx1	sp|O60180|ARX1_SCHPO Probable metalloprotease arx1 OS=Schizosaccharomyces pombe (strain 972 / ATCC 24843) OX=284812 GN=arx1 PE=3 SV=1	45.672	362
			0	0	0	0	0	0	21711	2	1447.4	115290	3	7686	33.8	O60181	O60181	3,4-dihydroxy-2-butanone 4-phosphate synthase	SPBC23E6.06c	sp|O60181|RIB3_SCHPO 3,4-dihydroxy-2-butanone 4-phosphate synthase OS=Schizosaccharomyces pombe (strain 972 / ATCC 24843) OX=284812 GN=SPBC23E6.06c PE=3 SV=1	22.564	363
			0	0	0	0	0	0	0	0	0	6420.7	1	279.16	3.9	O60185	O60185	Methylthioribose-1-phosphate isomerase	mri1	sp|O60185|MTNA_SCHPO Methylthioribose-1-phosphate isomerase OS=Schizosaccharomyces pombe (strain 972 / ATCC 24843) OX=284812 GN=mri1 PE=3 SV=1	39.379	364
			173690	7	7895.2	0	0	0	11962000	27	543710	19155000	29	870680	88.7	O60198	O60198	S-adenosylmethionine synthase	sam1	sp|O60198|METK_SCHPO S-adenosylmethionine synthase OS=Schizosaccharomyces pombe (strain 972 / ATCC 24843) OX=284812 GN=sam1 PE=1 SV=1	41.831	365
[truncated: 982 more rows]
