# Supplementary material for: The Greatwall-Endosulfine-PP2A/B55 pathway controls entry into quiescence by promoting translation of Elongator-tuneable transcripts
Source: Research Square preprint supplement (doi:10.21203/rs.3.rs-3616701/v1), 2023-12-05
Supplement: Supplementary file 4 [file 7348d64b6f97bf443067d434.xlsx]

## Sheet: wt_vs_igo1_4_cod_up
Coding genes upregulated in igo1∆ compared to the wild-type in MM-N 4h.
	systematic	synonyms	baseMean	log2FoldChange	lfcSE	stat	pvalue	padj
1	SPAC977.15	SPAC977.15	861.708	7.80076	0.210503	37.0577	1.34813e-300	1.69091e-298
2	SPBC1348.05	SPBC1348.05	103.259	7.41739	0.411467	18.0267	1.20251e-72	2.1377e-71
3	SPAC186.06	SPAC186.06	43.0789	7.38352	0.699508	10.5553	4.80119e-26	2.93488e-25
4	SPAC750.02c	SPAC750.02c	5.28713	7.33203	1.26081	5.81532	6.05184e-09	1.63825e-08
5	SPCC70.08c	SPCC70.08c	5913.72	6.66833	0.130001	51.2943	0	0
6	SPBC9B6.02c	Tf2-9	12.1012	6.6397	1.57209	4.2235	2.40542e-05	4.98834e-05
7	SPAC2E1P3.03c	Tf2-3	44.0253	6.61422	0.549746	12.0314	2.43011e-33	1.95014e-32
8	SPCC191.11	inv1	5195.09	6.49512	0.289141	22.4635	9.43972e-112	2.80418e-110
9	SPAC27E2.08	Tf2-6	1033.33	6.45875	0.313011	20.6343	1.35205e-94	3.29403e-93
10	SPBC839.06	cta3	9418.79	6.35942	0.215995	29.4425	1.57203e-190	8.87279e-189
11	SPAPB15E9.03c	Tf2-5	13.6158	6.272	0.950086	6.60151	4.06996e-11	1.25242e-10
12	SPAC977.18	SPAC977.18	15.6279	6.08248	0.777192	7.82623	5.02729e-15	1.91938e-14
13	SPAC9.04	Tf2-1	62.6511	5.92636	0.473077	12.5273	5.29487e-36	4.48277e-35
14	SPCC1020.14	Tf2-12	4.10659	5.79389	1.28204	4.51928	6.20513e-06	1.34617e-05
15	SPAC19D5.09c	Tf2-8	4813.83	5.68445	0.199862	28.4419	6.13695e-178	3.12523e-176
16	SPAC9G1.14	SPAC9G1.14	56.4602	5.63494	0.42535	13.2478	4.64797e-40	4.30652e-39
17	SPAC167.08	Tf2-2	700.001	5.50918	0.178804	30.8113	1.84795e-208	1.21516e-206
18	SPAC13D1.01c	Tf2-7	3355.2	5.48642	0.157823	34.7632	8.76969e-265	8.4853e-263
19	SPCC1494.11c	Tf2-13	509.886	5.45	0.203239	26.8156	2.12363e-158	9.65326e-157
20	SPAC21E11.04	aca1	4056.99	5.42217	0.127418	42.5542	0	0
21	SPAC26A3.13c	Tf2-4	219.056	5.4088	0.246857	21.9107	2.05581e-106	5.70656e-105
22	SPAC1B3.16c	vht1	26541.4	5.36148	0.0828784	64.6909	0	0
23	SPBC1E8.04	Tf2-10	392.104	5.32404	0.198059	26.8811	3.65424e-159	1.68368e-157
24	SPAC977.02	ftm2	7.03362	5.32348	0.9697	5.48982	4.0234e-08	1.02755e-07
25	SPBC18E5.15	SPBC18E5.15	553.979	5.28029	0.148783	35.4899	7.03714e-276	7.2216e-274
26	SPBPB2B2.18	SPBPB2B2.18	13.7452	5.27744	1.30193	4.05356	5.04436e-05	0.000101925
27	SPAC2E1P3.02c	amt3	768.247	5.20895	0.13942	37.3617	1.63886e-305	2.17646e-303
28	SPCC576.17c	SPCC576.17c	661.657	5.11044	0.165103	30.9531	2.3056e-210	1.54612e-208
29	SPAC6C3.03c	SPAC6C3.03c	66.6018	4.90818	0.347497	14.1244	2.68668e-45	2.79093e-44
30	SPBC1289.17	Tf2-11	1360.28	4.67167	0.147246	31.7269	6.61714e-221	4.87151e-219
31	SPAC1F8.02c	shu1	72.9497	4.59594	0.294131	15.6255	4.88026e-55	6.18989e-54
32	SPBC1271.08c	SPBC1271.08c	2999.45	4.57957	0.10119	45.2573	0	0
33	SPBPB10D8.03	SPBPB10D8.03	29.3424	4.53984	0.532738	8.5217	1.57231e-17	6.82645e-17
34	SPAC212.07c	SPAC212.07c	6.74109	4.38322	0.921906	4.75452	1.98918e-06	4.49389e-06
35	SPAC343.21	SPAC343.21	252.323	4.24295	0.146997	28.8642	3.36649e-183	1.75394e-181
36	SPAC11D3.09	SPAC11D3.09	622.775	4.08004	0.127252	32.0626	1.46407e-225	1.13979e-223
37	SPAC8E11.08c	SPAC8E11.08c	17.3619	4.03731	0.89135	4.52943	5.91437e-06	1.28391e-05
38	SPBPB21E7.04c	SPBPB21E7.04c	1796.74	3.98129	0.227245	17.5198	1.01161e-68	1.68344e-67
39	SPAP8A3.07c	SPAP8A3.07c	14764.8	3.92751	0.0727116	54.0148	0	0
40	SPBC1105.02c	lys4	15768.3	3.78533	0.0668102	56.6579	0	0
41	SPAC222.08c	sno1	3102.62	3.70852	0.0788794	47.015	0	0
42	SPBC19F5.04	SPBC19F5.04	8938.66	3.70339	0.0535274	69.1868	0	0
43	SPCC70.12c	ecl1	9701.23	3.64527	0.0752357	48.4513	0	0
44	SPBPB10D8.06c	SPBPB10D8.06c	683.656	3.6389	0.159781	22.7743	8.24196e-115	2.54899e-113
45	SPCC364.07	ser3	20338.9	3.54576	0.0887104	39.9701	0	0
46	SPBC1773.12	SPBC1773.12	3403.11	3.54183	0.0746659	47.4358	0	0
47	SPBC1289.14	SPBC1289.14	921.739	3.49514	0.149507	23.3777	7.20425e-121	2.38021e-119
48	SPBC3E7.16c	leu3	36433.5	3.48235	0.053256	65.3888	0	0
49	SPCC4B3.03c	mam301	44262.8	3.47303	0.0480667	72.2544	0	0
50	SPATRNACYS.02	SPATRNACYS.02	5.12339	3.43992	0.964057	3.56817	0.000359482	0.000670921
