# Supplementary material for: The Greatwall-Endosulfine-PP2A/B55 pathway controls entry into quiescence by promoting translation of Elongator-tuneable transcripts
Source: Research Square preprint supplement (doi:10.21203/rs.3.rs-3616701/v1), 2023-12-05
Supplement: Supplementary file 5 [file 9aca134666c1a81c0a1ce725.xlsx]

## Sheet: final
Proteins co-purifying with GFP-Pab1 after 1 hour nitrogen depletion
Protein accession numbers	Exclusive spectrum count	Percentage sequence coverage	Protein	Description
SPAC227.07c	5547	0.799	Pab1	protein phosphatase regulatory subunit Pab1	FALSE
SPAP8A3.09c	1427	0.82	Paa1	protein phosphatase regulatory subunit Paa1	FALSE
SPBC16H5.07c	897	0.882	Ppa2	serine/threonine protein phosphatase Ppa2	FALSE
SPCC794.09c	552	0.567	Tef101	translation elongation factor EF-1 alpha Ef1a-a	FALSE
SPBPJ4664.04	174	0.47	Cop1	coatomer alpha subunit Cop1 (predicted)	FALSE
SPAC823.15	146	0.634	Ppa1	minor serine/threonine protein phosphatase Ppa1	FALSE
SPBC146.14c	132	0.476	Sec26	coatomer beta subunit (predicted)	FALSE
SPCC965.04c	122	0.463	Yme1	mitochondrial inner membrane i-AAA protease complex subunit Yme1 (predicted)	FALSE
SPBC26H8.01	112	0.405	Thi2	thiazole biosynthetic enzyme	FALSE
SPBC119.07	109	0.322	Ppk19	serine/threonine protein kinase Ppk19.	FALSE
SPCC162.08c	106	0.44	Nup211	nucleoporin nup211.	FALSE
SPAC1486.04c	96	0.38	Alm1	medial ring protein Alm1	FALSE
SPAC57A7.10c	96	0.434	Sec21	coatomer gamma subunit Sec21 (predicted)	FALSE
SPBC646.11	93	0.568	Cct6	chaperonin-containing T-complex zeta subunit Cct6	FALSE
SPAC821.07c	77	0.289	Moc3	transcription factor Moc3	FALSE
SPAC1F7.09c	72	0.778	Spac1F7.09C	allantoicase (predicted)	FALSE
SPBC36.07	72	0.334	Elp1	elongator subunit Elp1 (predicted)	FALSE
SPCC970.01	69	0.277	Rad16	DNA repair endonuclease XPF	FALSE
SPAC1834.11c	60	0.453	Sec18	secretory pathway protein Sec18 (predicted)	FALSE
SPCC1902.02	58	0.448	Mug72	oxidoreductase (predicted)	FALSE
SPAC17G8.13c	57	0.526	Mst2	Mst2 complex. histone acetyltransferase Mst2	FALSE
SPBC19C7.06	54	0.425	Prs1	cytoplasmic proline-tRNA ligase Prs1 (predicted)	FALSE
SPAC458.05	52	0.321	Pik3	phosphatidylinositol 3-kinase Pik3	FALSE
SPCC4G3.14	52	0.316	Mdj1	mitochondrial DNAJ domain protein Mdj1 (predicted)	FALSE
SPBC14F5.13c	50	0.359	Pho8	vacuolar membrane alkaline phosphatase (predicted)	FALSE
SPBC839.10	47	0.433	Usp107	U1 snRNP-associated protein Usp107	FALSE
SPAC20G8.06	45	0.194	Not1	CCR4-Not complex subunit Not1 (predicted)	FALSE
SPBC26H8.04c	45	0.222	Iml1	GTPase-activating protein subunit of SEA and Iml1p complexes Iml1 (predicted)	FALSE
SPBC2G5.06c	44	0.397	Hmt2	sulfide-quinone oxidoreductase	FALSE
SPAC29A4.20	43	0.458	Elp3	elongator complex subunit Elp3 (predicted)	FALSE
SPAC521.05	40	0.57	Rps802	40S ribosomal protein S8 (predicted)	FALSE
SPAC11E3.05	38	0.22	Sea3	ubiquitin-protein ligase E3, coatamer related complex subunit Sea3 (predicted)	FALSE
SPAC25G10.06	38	0.368	Rps2801	40S ribosomal protein S28 (predicted)	FALSE
SPCC285.08	37	0.275	Ret2	coatomer delta subunit Ret2 (predicted)	FALSE
SPCC737.08	37	0.0884	Spcc737.08	midasin (predicted)	FALSE
SPBC30B4.03c	36	0.588	Adn1	adhesion defective protein	FALSE
SPAC23H4.10c	35	0.535	Thi4	bifunctional thiamine-phosphate dipyrophosphorylase/hydroxyethylthiazole kinase	FALSE
SPBC24C6.05	35	0.583	Sec28	coatomer epsilon subunit (predicted)	FALSE
SPAC323.04	31	0.402	Spac323.04	mitochondrial ATPase (predicted)	FALSE
SPAC19E9.01c	30	0.391	Nup40	nucleoporin Nup40	FALSE
SPAC4F8.11	30	0.277	Sea2	SEA complex subunit, human WDR24 family, Sea2 (predicted)	FALSE
SPBC17D11.04c	30	0.229	Nto1	histone acetyltransferase complex subunit Nto1 (predicted)	FALSE
SPBC27.08c	29	0.394	Sua1	sulfate adenylyltransferase.	FALSE
SPCC16A11.13	29	0.508	Luc7	U1 snRNP-associated protein Luc7	FALSE
SPCC1840.03	29	0.213	Sal3	karyopherin Sal3	FALSE
SPAC11D3.15	28	0.202	Spac11D3.15	5-oxoprolinase (ATP-hydrolizing) (predicted)	FALSE
SPAC12G12.01c	28	0.281	Sea4	SEA complex subunit, ubiquitin-protein ligase E3, Sea4 (predicted)	FALSE
SPBP22H7.08	28	0.469	Rps1002	40S ribosomal protein S10 (predicted)	FALSE
SPCC1223.02	28	0.312	Nmt1	4-amino-5-hydroxymethyl-2-methylpyrimidine phosphate synthase Nmt1	FALSE
SPCC576.07	28	0.411	Ret3	coatomer zeta subunit (predicted)	FALSE
SPAC20G8.10c	27	0.336	Atg6	autophagy associated beclin family protein Atg6	FALSE
SPAC23G3.11	26	0.368	Rpn6	19S proteasome regulatory subunit Rpn6 (predicted)	FALSE
SPAC6G10.05c	26	0.182	Trs120	TRAPP complex subunit Trs120 (predicted)	FALSE
SPBC1773.01	26	0.278	Far8	SIP/FAR complex striatin subunit, Far8/Csc3	FALSE
SPBC17D11.07c	26	0.202	Rpn2	19S proteasome regulatory subunit Rpn2 (predicted)	FALSE
SPCC1393.03	26	0.477	Rps1501	40S ribosomal protein S15 (predicted)	FALSE
SPAC15F9.02	25	0.487	Seh1	Seh1-associated complex subunit Seh1	FALSE
SPAC25G10.09c	25	0.133	Pan1	actin cortical patch component, with EF hand and WH2 motif Panl (predicted)	FALSE
SPBC19C2.07	25	0.45	Fba1	fructose-bisphosphate aldolase Fba1	FALSE
SPBC21C3.15c	25	0.247	Spbc21C3.15C	aldehyde dehydrogenase (predicted)	FALSE
SPBC409.16c	25	0.758	Saw1	recombination protein Saw1 (predicted)	FALSE
SPAC4D7.13	24	0.226	Usp104	U1 snRNP-associated protein Usp104	FALSE
SPBC11G11.03	24	0.415	Mrt4	mRNA turnover and ribosome assembly protein Mrt4 (predicted)	FALSE
SPBC577.06c	24	0.108	Stt4	1-phosphatidylinositol 4-kinase Stt4 (predicted)	FALSE
SPCC1682.04	24	0.443	Cdc31	centrin	FALSE
SPCC285.14	24	0.168	Trs130	TRAPP complex subunit Trs130 (predicted)	FALSE
SPCC330.14c	24	0.342	Rpl2402	60S ribosomal protein L24 (predicted)	FALSE
SPAC13G6.07c	23	0.444	Rps601	40S ribosomal protein S6	FALSE
SPAC20G8.02	23	0.205	Spac20G8.02	mitochondrial DDHD family phospholipase (predicted)	FALSE
SPAC2F3.10	23	0.201	Vps54	GARP complex subunit Vps54 (predicted)	FALSE
SPBC27B12.04c	23	0.213	Far11	SIP/FAR complex subunit, Far11/Csc2	FALSE
SPAC22H12.02	22	0.456	Tfg3	Mst2 complex. transcription factor TFIIF complex subunit Tfg3	FALSE
SPBC29A3.18	22	0.358	Cyt1	cytochrome c1 Cyt1 (predicted)	FALSE
SPAC23A1.08c	21	0.42	Rpl3401	60S ribosomal protein L34	FALSE
SPBC16A3.01	21	0.473	Spn3	mitotic septin Spn3	FALSE
SPAC22H10.04	20	0.498	Ppa3	protein phosphatase type 2A Ppa1	FALSE
SPAC26A3.05	20	0.184	Chc1	clathrin heavy chain Chc1 (predicted)	FALSE
SPBC27B12.13	20	0.375	Tom40	mitochondrial TOM complex subunit Tom40 (predicted)	FALSE
SPBC646.09c	20	0.353	Int6	eIF3e subunit Int6	FALSE
SPCC162.02c	20	0.183	Spcc162.02C	AMP-binding dehydrogenase (predicted)	FALSE
SPCC70.03c	20	0.274	Spcc70.03C	proline dehydrogenase (predicted)	FALSE
SPCC736.06	20	0.239	Dar2	mitochondrial aspartate-tRNA ligase Dar2 (predicted)	FALSE
SPAC4F10.14c	19	0.583	Btf3	nascent polypeptide-associated complex beta subunit	FALSE
SPBC4C3.07	19	0.364	Eif6	translation initiation factor eIF3f	FALSE
SPCC1020.13c	19	0.254	Spcc1020.13C	DDHD family phospholipase (predicted)	FALSE
SPBC119.01	18	0.209	Rpn3	19S proteasome regulatory subunit Rpn3	FALSE
SPBC18E5.06	18	0.621	Rps21	40S ribosomal protein S21	FALSE
SPCC1442.10c	18	0.32	Rpb3	RNA polymerase II subunit 3	FALSE
SPAC1250.05	17	0.35	Rpl3002	60S ribosomal protein L30 (predicted)	FALSE
SPAC890.06	17	0.137	Nup155	nucleoporin Nup155	FALSE
SPBC146.03c	17	0.119	Cut3	condensin complex SMC subunit Smc4	FALSE
SPBC947.15c	17	0.254	Nde1	mitochondrial NADH dehydrogenase (ubiquinone) Nde1 (predicted)	FALSE
SPAC1834.08	16	0.112	Mak1	histidine kinase Mak1	FALSE
SPAC343.05	16	0.279	Vma1	V-type ATPase V1 domain, subunit A	FALSE
SPBC16C6.02c	16	0.0662	Vps1302	chorein homolog Vps1302 (predicted)	FALSE
SPBC543.04	16	0.193	Npr3	SEA/Iml1/Npr2/3 complex subunit Npr3 (predicted)	FALSE
SPCC576.11	16	0.368	Rpl15	60S ribosomal protein L15 (predicted)	FALSE
SPAC16.04	15	0.18	Dus3	tRNA dihydrouridine synthase Dus3 (predicted)	FALSE
SPAC23C11.11	15	0.292	Cka1	serine/threonine protein kinase Cka1	FALSE
SPAC3A12.15	15	0.196	Vps53	GARP complex subunit Vps53 (predicted)	FALSE
SPAC9.07c	15	0.352	Spac9.07C	GTPase Rbg1 (predicted)	FALSE
SPBC29A10.16c	15	0.653	Spbc29A10.16C	cytochrome b5 (predicted)	FALSE
SPCC330.06c	15	0.442	Pmp20	thioredoxin peroxidase Pmp20	FALSE
SPCC970.05	15	0.242	Rpl3601	60S ribosomal protein L36	FALSE
SPAC24C9.10c	14	0.285	Mrp4	mitochondrial ribosomal protein subunit S2 (predicted)	FALSE
SPAC56F8.03	14	0.101	Spac56F8.03	translation initiation factor IF2 (predicted)	FALSE
SPAC8F11.08c	14	0.309	Spac8F11.08C	esterase/lipase (predicted)	FALSE
SPAC9.09	14	0.16	Met26	homocysteine methyltransferase Met26	FALSE
SPAC922.07c	14	0.224	Atd2	aldehyde dehydrogenase (predicted)	FALSE
SPAC9G1.02	14	0.148	Wis4	MAP kinase kinase kinase Wis4	FALSE
SPBC1A4.05	14	0.207	Blt1	ubiquitin domain-like protein Blt1	FALSE
SPBC3H7.13	14	0.346	Far10	SIP/FAR complex FHA domain subunit Far10/Csc1	FALSE
SPAC1006.09	13	0.0745	Win1	MAP kinase kinase kinase Win1	FALSE
SPAC1782.10c	13	0.253	Nhp2	box H/ACA snoRNP complex subunit Nhp2	FALSE
SPAC30.01c	13	0.0648	Sec72	Sec7 domain protein, ARF GEF Sec72	FALSE
SPAC31G5.04	13	0.254	Lys12	homoisocitrate dehydrogenase Lys12	FALSE
SPAC3H8.04	13	0.311	Spac3H8.04	possible chromosome segregation protein (predicted)	FALSE
SPAC4D7.09	13	0.229	Tif223	translation initiation factor eIF2B gamma subunit (predicted)	FALSE
SPBC215.09c	13	0.322	Erg10	acetyl-CoA C-acetyltransferase Erg10 (predicted)	FALSE
SPBC354.14c	13	0.233	Vac8	vacuolar protein Vac8 (predicted)	FALSE
SPBC691.04	13	0.224	Mss116	mitochondrial ATP-dependent RNA helicase Mss116 (predicted)	FALSE
SPBC776.02c	13	0.223	Dis2	serine/threonine protein phosphatase PP1 subfamily, Dis2	FALSE
SPBP4H10.06c	13	0.132	Cut14	condensin complex SMC subunit Smc2	FALSE
SPCC1450.11c	13	0.0703	Cek1	serine/threonine protein kinase Cek1	FALSE
SPCC16A11.17	13	0.134	Mcm4	MCM complex subunit Mcm4/Cdc21	FALSE
SPAC11D3.14c	12	0.129	Spac11D3.14C	5-oxoprolinase (ATP-hydrolizing) (predicted)	FALSE
SPAC1805.17	12	0.11	Crm1	importin family nuclear export receptor Crm1	FALSE
SPAC23C4.19	12	0.115	Spt5	DSIF transcription elongation factor complex subunit Spt5	FALSE
SPAC23D3.09	12	0.33	Arp42	SWI/SNF and RSC complex subunit Arp42	FALSE
SPAC23D3.11	12	0.419	Ayr1	1-acyldihydroxyacetone phosphate reductase (predicted)	FALSE
SPAC29A4.03c	12	0.181	Spac29A4.03C	mitochondrial ribosomal protein subunit Mrps9 (predicted)	FALSE
SPAC644.16	12	0.175	Rna15	RNA-binding protein Rna15	FALSE
SPAC694.02	12	0.0932	Spac694.02	DEAD/DEAH box helicase	FALSE
SPAC7D4.03c	12	0.107	Spac7D4.03C	conserved fungal family	FALSE
SPAPB2C8.01	12	0.0197	Spapb2C8.01	cell surface glycoprotein, adhesion molecule (predicted)	FALSE
SPCC1322.16	12	0.281	Phb2	prohibitin Phb2 (predicted)	FALSE
SPCC613.06	12	0.519	Rpl902	60S ribosomal protein L9	FALSE
SPCC736.10c	12	0.395	Mrps8	mitochondrial ribosomal protein subunit S8 (predicted)	FALSE
SPCC790.02	12	0.162	Pep3	HOPS/CORVET complex subunit, ubiquitin-protein ligase E3 (predicted)	FALSE
SPAC17H9.12c	11	0.459	Spac17H9.12C	mitochondrial cytochrome c-heme linkage protein Cyc2 (predicted)	FALSE
SPAC19B12.03	11	0.0778	Bgs3	1,3-beta-glucan synthase subunit Bgs3	FALSE
SPAC1B1.02c	11	0.11	Spac1B1.02C	NAD/NADH kinase (predicted)	FALSE
SPAC3A12.18	11	0.17	Zwf1	glucose-6-phosphate 1-dehydrogenase (predicted)	FALSE
SPAC3F10.11c	11	0.119	Abc2	glutathione S-conjugate-exporting ATPase Abc2	FALSE
SPAC56F8.05c	11	0.255	Mug64	BAR domain protein (predicted)	FALSE
SPAC821.06	11	0.293	Spn2	mitotic and meiotic (sporulation) septin Spn2	FALSE
SPAC824.05	11	0.0778	Vps16	HOPS/CORVET complex subunit Vps16 (predicted)	FALSE
SPBC15D4.09c	11	0.159	Spbc15D4.09C	cystathionine gamma-synthase Met3 (predicted)	FALSE
SPBC16G5.13	11	0.595	Ptf2	Mst2 complex. Mst2 histone acetytransferase acytyltransferase complex subunit	FALSE
SPBC1703.02	11	0.0731	Rsc9	RSC complex subunit Rsc9. Chromatin remodeller	FALSE
SPBC19C7.07c	11	0.296	Sen34	tRNA-splicing endonuclease catalytic subunit Sen34 (predicted)	FALSE
SPBC19G7.05c	11	0.0625	Bgs1	1,3-beta-glucan synthase catalytic subunit Bgs1	FALSE
SPCC18.06c	11	0.2	Caf1	CCR4-Not complex CAF1 family ribonuclease subunit Caf1	FALSE
SPCC1919.09	11	0.488	Tif6	translation initiation factor-like ribosome biogenesis protein	FALSE
SPAC11D3.18c	10	0.114	Spac11D3.18C	plasma membrane nicotinic acid transmembrane transporter (predicted)	FALSE
SPAC140.02	10	0.14	Gar2	nucleolar protein required for rRNA processing	FALSE
SPAC1782.01	10	0.059	Ecm29	proteasome assembly chaperone Ecm29	FALSE
SPAC1A6.10	10	0.315	Tcd1	tRNA threonylcarbamoyladenosine dehydratase Tcd1 (predicted)	FALSE
SPAC23C11.16	10	0.16	Plo1	Polo kinase Plo1	FALSE
SPAC25H1.08c	10	0.216	Spac25H1.08C	ribosome assembly protein Sqt1 (predicted)	FALSE
SPAC27F1.07	10	0.191	Ost1	dolichyl-diphospho-oligosaccharide-protein glycosyltransferase Ost1 (predicted)	FALSE
SPAC3A11.07	10	0.171	Nde2	mitochondrial NADH dehydrogenase (ubiquinone) Nde2 (predicted)	FALSE
SPAC922.06	10	0.31	Spac922.06	3-oxoacyl-[acyl-carrier-protein]reductase (predicted)	FALSE
SPAPJ698.03c	10	0.129	Prp12	U2 snRNP-associated protein Sap130	FALSE
SPBC13A2.02	10	0.122	Nup82	nucleoporin Nup82	FALSE
SPBC1861.05	10	0.127	Spbc1861.05	pseudouridine-metabolizing bifunctional protein (predicted)	FALSE
SPBC18H10.19	10	0.2	Vps38	phophatidylinositol 3-kinase complex subunit Vps38	FALSE
SPBC2G2.08	10	0.134	Ade9	C-1-tetrahydrofolatesynthase/methylenetetrahydrof olatedehydrogenase/methylenetetrahydrofolatecyclohydrolase/ formyltetrahydrofolatesynthetase (predicted)	FALSE
SPBC409.07c	10	0.174	Wis1	MAP kinase kinase Wis1	FALSE
SPBC543.02c	10	0.311	Spbc543.02C	DNAJ/TPR domain protein DNAJC7 family	FALSE
SPCC1682.10	10	0.235	Rpn8	19S proteasome regulatory subunit Rpn8 (predicted)	FALSE
SPCC338.15	10	0.277	Wbp1	dolichyl-di-phosphooligosaccharide-protein glycotransferase subunit Wbp1 (predicted)	FALSE
SPCC548.06c	10	0.122	Ght8	hexose transmembrane transporter Ght8 (predicted)	FALSE
SPAC1687.01	9	0.544	Rpc19	DNA-directed RNA polymerase I and III subunit Rpc19	FALSE
SPAC17G6.11c	9	0.044	Spac17G6.11C	glucosidase (predicted)	FALSE
SPAC1851.03	9	0.238	Ckb1	CK2 family regulatory subunit Ckb1	FALSE
SPAC1B2.03c	9	0.201	Spac1B2.03C	GNS1/SUR4 family protein (predicted)	FALSE
SPAC222.08c	9	0.329	Sno1	glutamine aminotransferase subunit Sno1 (predicted)	FALSE
SPAC222.14c	9	0.121	Sey1	GTP binding protein Sey1 (predicted)	FALSE
SPAC25A8.02	9	0.172	Atg14	autophagy protein Atg14	FALSE
SPAC2C4.10c	9	0.283	Csc4	SIP/FAR complex subunit, Csc4	FALSE
SPAC2G11.10c	9	0.167	Uba42	thiosulfate sulfurtransferase, URM1 activating enzyme E1-type Uba42 (predicted)	FALSE
SPAC31G5.17c	9	0.41	Rps1001	40S ribosomal protein S10 (predicted)	FALSE
SPAC4H3.11c	9	0.13	Ppc89	spindle pole body protein Ppc89	FALSE
SPAC5H10.01	9	0.286	Spac5H10.01	DUF1445 family mitochondrial protein (predicted)	FALSE
SPAC637.04	9	0.126	Ypp1	cargo-transport protein Ypp1 (predicted)	FALSE
SPAC959.02	9	0.277	Sec17	alpha SNAP (predicted)	FALSE
SPAC977.14c	9	0.248	Spac977.14C	aldo/keto reductase, predicted calcium channel regulator	FALSE
SPBC11G11.05	9	0.171	Rpa34	DNA-directed RNA polymerase I complex subunit Rpa34 (predicted)	FALSE
SPBC365.06	9	0.316	Pmt3	SUMO	FALSE
SPBC582.07c	9	0.188	Rpn7	19S proteasome regulatory subunit Rpn7	FALSE
SPBP8B7.18c	9	0.227	Spbp8B7.18C	phosphomethylpyrimidine kinase (predicted)	FALSE
SPCC550.11	9	0.123	Spcc550.11	karyopherin (predicted)	FALSE
SPCC622.09	9	0.27	Htb1	histone H2B Htb1	FALSE
SPAC13G6.11c	8	0.178	Erg12	mevalonate kinase Erg12 (predicted)	FALSE
SPAC1B3.12c	8	0.634	Rpb10	DNA-directed RNA polymerase I, II, and III subunit Rpb10	FALSE
SPAC26A3.15c	8	0.124	Nsp1	nucleoporin Nsp1	FALSE
SPAC26H5.07c	8	0.0891	Spac26H5.07C	seven transmembrane receptor protein (predicted)	FALSE
SPAC3G6.10c	8	0.522	Vps51	GARP complex subunit Vps51 (predicted)	FALSE
SPAC6F6.03c	8	0.212	Spac6F6.03C	ribosome export GTPase (predicted)	FALSE
SPAC6G9.06c	8	0.0646	Pcp1	pericentrin Pcp1	FALSE
SPAC9G1.11c	8	0.25	Spn4	mitotic septin Spn4	FALSE
SPAPB1A10.08	8	0.0745	Spapb1A10.08	Schizosaccharomyces specific protein	FALSE
SPBC1347.02	8	0.249	Fkbp39	FKBP-type peptidyl-prolyl cis-trans isomerase (predicted)	FALSE
SPBC13G1.01c	8	0.275	Nam9	mitochondrial ribosomal protein subunit S4 (predicted)	FALSE
SPBC1685.02c	8	0.378	Rps1202	40S ribosomal protein S12 (predicted)	FALSE
SPBC16G5.01	8	0.348	Rpn12	19S proteasome regulatory subunit Rpn12	FALSE
SPBC1709.09	8	0.266	Rrf1	mitochondrial translation termination factor Rrf1	FALSE
SPBC1921.05	8	0.0941	Ape2	aminopeptidase Ape2 (predicted)	FALSE
SPBC21H7.07c	8	0.273	His5	imidazoleglycerol-phosphate dehydratase His5	FALSE
SPBC2F12.02c	8	0.178	Mrpl7	mitochondrial ribosomal protein subunit L7 (predicted)	FALSE
SPBC3B9.14c	8	0.101	Mrpl3	mitochondrial ribosomal protein subunit L3 (predicted)	FALSE
SPBC83.05	8	0.136	Spbc83.05	mitochondrial RNA-binding protein (predicted)	FALSE
SPCC1183.02	8	0.182	Spcc1183.02	glutathione S-transferase, translational elongation factor eEF1 (predicted)	FALSE
SPCC1442.16c	8	0.35	Zta1	NADPH quinone oxidoreductase/ARE-binding protein (predicted)	FALSE
SPCC1682.09c	8	0.27	Ggc1	mitochondrial guanine nucleotide transmembrane transporter Ggc1 (predicted)	FALSE
SPCC613.04c	8	0.11	Rng3	UCS-domain protein Rng3	FALSE
SPAC1635.01	7	0.202	Spac1635.01	mitochondrial outer membrane voltage-dependent anion-selective channel (predicted)	FALSE
SPAC1805.04	7	0.074	Nup132	nucleoporin Nup132	FALSE
SPAC23G3.02c	7	0.0209	Sib1	ferrichrome synthetase Sib1	FALSE
SPAC23H3.03c	7	0.112	Npr2	SEA/Iml1/Npr2/3 complex subunit Npr2 (predicted)	FALSE
SPAC23H4.14	7	0.0751	Vam6	guanyl-nucleotide exchange factor, HOPS complex subunit Vam6 (predicted)	FALSE
SPAC29A4.04c	7	0.124	Cbf5	pseudouridylate synthase Cbf5 (predicted)	FALSE
SPAC4F10.10c	7	0.151	Mnn9	mannosyltransferase complex subunit, Anp family Mnn9 (predicted)	FALSE
SPAC5H10.10	7	0.13	Spac5H10.10	NADPH dehydrogenase (predicted)	FALSE
SPAC607.05	7	0.215	Rpn9	19S proteasome regulatory subunit Rpn9	FALSE
SPAC637.10c	7	0.284	Rpn10	19S proteasome regulatory subunit Rpn10	FALSE
SPAC6F6.09	7	0.21	Eaf6	Mst2 complex. Mst2/NuA4 histone acetyltransferase complex subunit Eaf6	FALSE
SPAC869.02c	7	0.141	Spac869.02C	nitric oxide dioxygenase (predicted)	FALSE
SPAC9E9.04	7	0.261	Spac9E9.04	bcap family homolog (predicted)	FALSE
SPAP27G11.05c	7	0.139	Vps41	HOPS complex subunit Vps41 (predicted)	FALSE
SPAPB8E5.07c	7	0.0688	Rrp12	rRNA processing protein Rrp12 (predicted)	FALSE
SPBC14F5.03c	7	0.118	Kap123	karyopherin Kap123	FALSE
SPBC1604.04	7	0.177	Spbc1604.04	mitochondrial thiamine pyrophosphate transmembrane transporter (predicted)	FALSE
SPBC211.04c	7	0.118	Mcm6	MCM complex subunit Mcm6	FALSE
SPBC28E12.06c	7	0.0376	Lvs1	beige protein homolog Lvs1 (predicted)	FALSE
SPBC2G2.06c	7	0.0591	Apl1	AP-2 adaptor complex subunit Apl1 (predicted)	FALSE
SPBC336.04	7	0.0866	Cdc6	DNA polymerase delta catalytic subunit Cdc6	FALSE
SPBC660.08	7	0.149	Spbc660.08	Schizosaccharomyces specific protein	FALSE
SPBC839.07	7	0.341	Ibp1	Cdc25 family phosphatase Ibp1	FALSE
SPBP35G2.11c	7	0.118	Spbp35G2.11C	transcription related zf-ZZ type zinc finger protein	FALSE
SPCC126.05c	7	0.239	Mrpl17	mitochondrial ribosomal protein subunit L17 (predicted)	FALSE
SPCC1753.05	7	0.182	Rsm1	RNA export factor Rsm1	FALSE
SPCC1919.10c	7	0.0719	Myo52	myosin type V	FALSE
SPCC24B10.07	7	0.134	Gad8	AGC family protein kinase Gad8	FALSE
SPCC4G3.06c	7	0.292	Mrpl4	mitochondrial ribosomal protein subunit L4 (predicted)	FALSE
SPCC663.04	7	0.431	Rpl39	60S ribosomal protein L39	FALSE
SPAC1039.07c	6	0.158	Spac1039.07C	aminotransferase class-III, possible transaminase, unknown specificity	FALSE
SPAC12B10.01c	6	0.0291	Spac12B10.01C	HECT-type ubiquitin-protein ligase E3 (predicted)	FALSE
SPAC17H9.14c	6	0.164	Pdi2	protein disulfide isomerase	FALSE
SPAC1805.08	6	0.459	Dlc1	dynein light chain Dlc1	FALSE
SPAC18G6.07c	6	0.139	Mra1	rRNA (pseudouridine) methyltransferase Mra1	FALSE
SPAC27F1.09c	6	0.0592	Prp10	U2 snRNP-associated protein Sap155	FALSE
SPAC343.14c	6	0.109	Spac343.14C	translation initiation factor eIF2B beta subunit (predicted)	FALSE
SPAC3A12.07	6	0.407	Rpb11	RNA polymerase II complex subunit Rpb11	FALSE
SPAC589.06c	6	0.149	Spac589.06C	pho88 family protein (predicted)	FALSE
SPAC630.03	6	0.143	Arp3	Arp2/3 protein complex, actin-like protein subunit Arp3	FALSE
SPAC823.12	6	0.0695	Vps11	HOPs/CORVET complex biquitin protein ligase E3 subunit Vps11 (predicted)	FALSE
SPAC823.14	6	0.245	Ptf1	Mst2 complex. Mst2 histone acetytransferase complex, predicted phosphoric monoester hydrolase Ptf1	FALSE
SPAC890.07c	6	0.165	Rmt1	type I protein arginine N-methyltransferase Rmt1	FALSE
SPAC926.08c	6	0.215	Rpf2	Brix domain ribosome biogenesis protein Rpf2	FALSE
SPAP7G5.06	6	0.105	Per1	plasma membrane amino acid permease Per1	FALSE
SPBC11G11.04	6	0.404	Trs20	TRAPP complex subunit Trs20 (predicted)	FALSE
SPBC1711.05	6	0.118	Spbc1711.05	nucleocytoplasmic transport chaperone Srp40 (predicted)	FALSE
SPBC1711.13	6	0.15	His2	histidinol dehydrogenase His2 (predicted)	FALSE
SPBC1718.04	6	0.0933	Spbc1718.04	glycerol-3-phosphate O-acyltransferase (predicted)	FALSE
SPBC19G7.10c	6	0.0597	Pdc2	topoisomerase II-associated deadenylation-dependent mRNA-decapping factor Pdc2 (predicted)	FALSE
SPBC20F10.01	6	0.206	Gar1	snoRNP pseudouridylase box H/ACA snoRNP complex protein Gar1	FALSE
SPBC21H7.02	6	0.223	Taf10	SAGA complex/transcription factor TFIID complex subunit Taf10	FALSE
SPBC28F2.12	6	0.0525	Rpb1	RNA polymerase II large subunit Rpb1	FALSE
SPBC354.02c	6	0.104	Sec61	translocon alpha subunit Sec61	FALSE
SPBC365.04c	6	0.0901	Spbc365.04C	RNA-binding protein, involved in ribosome biogenesis (predicted)	FALSE
SPBC582.08	6	0.212	Rhp1602	alanine aminotransferase Rhp1602 (predicted)	FALSE
SPBC660.07	6	0.0639	Ntp1	alpha,alpha-trehalase Ntp1	FALSE
SPBC725.14	6	0.126	Arg6	acetylglutamate synthase Arg6 (predicted)	FALSE
SPBC8E4.03	6	0.157	Spbc8E4.03	agmatinase 2 (predicted)	FALSE
SPBP16F5.03c	6	0.0211	Tra1	SAGA complex phosphatidylinositol pseudokinase Tra1	FALSE
SPCC1259.09c	6	0.136	Pdx1	pyruvate dehydrogenase protein x component, Pdx1 (predicted)	FALSE
SPCC1442.09	6	0.18	Trp3	anthranilate synthase component I (predicted)	FALSE
SPCC364.07	6	0.167	Ser3	D-3 phosphoglycerate dehydrogenase Ser3 (predicted)	FALSE
SPCC4B3.17	6	0.145	Cbp3	ubiquinol cytochrome-c reductase assembly protein Cbp3 (predicted)	FALSE
SPCC613.10	6	0.176	Qcr2	ubiquinol-cytochrome-c reductase complex core protein Qcr2 (predicted)	FALSE
SPCC622.12c	6	0.135	Gdh1	NADP-specific glutamate dehydrogenase Gdh1 (predicted)	FALSE
SPCC895.06	6	0.0908	Elp2	elongator complex subunit Elp2 (predicted)	FALSE
SPCC962.03c	6	0.113	Cut15	karyopherin Cut15	FALSE
SPCC970.06	6	0.189	Spcc970.06	cargo receptor for soluble proteins (predicted)	FALSE
SPMIT.08	6	0.198	Var1	mitochondrial ribosomal small subunit Var1	FALSE
SPAC1071.02	5	0.0422	Mms19	Dos2 silencing complex subunit Mms19	FALSE
SPAC10F6.09c	5	0.0695	Psm3	mitotic cohesin complex subunit Psm3	FALSE
SPAC12G12.09	5	0.0901	Eti1	conserved fungal protein associated with stress granule	FALSE
SPAC12G12.12	5	0.108	Gms2	UDP-galactose transmembrane transporter Gms2 (predicted)	FALSE
SPAC13A11.01c	5	0.0695	Rga8	Rho-type GTPase activating protein Rga8	FALSE
SPAC1786.03	5	0.0765	Cut11	spindle pole body docking protein Cut11	FALSE
SPAC17G6.10	5	0.0835	Ssr1	SWI/SNF and RSC complex subunit Ssr1	FALSE
SPAC20G8.09c	5	0.0639	Nat10	ribosome biogenesis ATPase	FALSE
SPAC21E11.06	5	0.139	Tif224	translation initiation factor eIF2B delta subunit (predicted)	FALSE
SPAC23C11.17	5	0.0557	Mdm28	mitochondrial inner membrane protein involved in potassium ion transport Mdm28 (predicted)	FALSE
SPAC27E2.09	5	0.029	Mak2	histidine kinase Mak2	FALSE
SPAC27F1.06c	5	0.13	Spac27F1.06C	FKBP-type peptidyl-prolyl cis-trans isomerase (predicted)	FALSE
SPAC29A4.08c	5	0.117	Prp19	ubiquitin-protein ligase E4 Prp19	FALSE
SPAC2F3.02	5	0.188	Spac2F3.02	ER protein translocation subcomplex subunit (predicted)	FALSE
SPAC2F7.13c	5	0.139	Wrs1	cytoplasmic tryptophan-tRNA ligase Wrs1 (predicted)	FALSE
SPAC343.12	5	0.0771	Rds1	conserved fungal protein	FALSE
SPAC3A12.14	5	0.513	Cam1	calmodulin Cam1	FALSE
SPAC4A8.04	5	0.118	Isp6	vacuolar serine protease Isp6	FALSE
SPAC4A8.05c	5	0.039	Myp2	myosin II heavy chain Myo3	FALSE
SPAC4D7.01c	5	0.026	Sec71	Sec7 domain protein, ARF GEF (predicted)	FALSE
SPAC56E4.03	5	0.139	Spac56E4.03	aromatic aminotransferase (predicted)	FALSE
SPAC56F8.10	5	0.103	Met9	methylenetetrahydrofolate reductase Met9	FALSE
SPAC607.03c	5	0.272	Snu13	U3 snoRNP-associated protein Snu13	FALSE
SPAC637.05c	5	0.145	Vma2	V-type ATPase V1 subunit B	FALSE
SPAC890.04c	5	0.1	Spac890.04C	ribosome biogenesis protein Ytm1 (predicted)	FALSE
SPAC9.10	5	0.0897	Thi9	thiamine transmembrane transporter Thi9	FALSE
SPACUNK4.11c	5	0.0851	Mpp6	nuclear exosome-associated RNA binding protein Mpp6	FALSE
SPAP14E8.03	5	0.157	Bos1	SNARE Bos1 (predicted)	FALSE
SPAP27G11.13c	5	0.406	Nop10	snoRNP pseudouridylase box H/ACA snoRNP complex protein (predicted)	FALSE
SPAP8A3.12c	5	0.0565	Tpp2	tripeptidyl-peptidase II Tpp2	FALSE
SPBC14F5.02	5	0.136	Trs65	TRAPP complex subunit Trs65 (predicted)	FALSE
SPBC1604.05	5	0.1	Pgi1	glucose-6-phosphate isomerase (predicted)	FALSE
SPBC1604.20c	5	0.119	Tea2	kinesin-like protein Tea2	FALSE
SPBC1677.03c	5	0.152	Tda1	threonine ammonia-lyase Tda1	FALSE
SPBC16G5.11c	5	0.256	Bag101	BAG family molecular chaperone regulator Bag101 (predicted)	FALSE
SPBC1861.08c	5	0.278	Lea1	U2 snRNP-associated protein Lea1 (predicted)	FALSE
SPBC23E6.04c	5	0.054	Utp10	U3 snoRNP-associated protein Utp10 (predicted)	FALSE
SPBC23G7.05	5	0.349	Sui1	translation initiation factor eIF1	FALSE
SPBC25D12.04	5	0.164	Suc22	ribonucleotide reductase small subunit Suc22	FALSE
SPBC28F2.08c	5	0.0729	Hrd3	HRD ubiquitin ligase complex subunit (predicted)	FALSE
SPBC2D10.14c	5	0.0517	Myo51	myosin type V	FALSE
SPBC336.11	5	0.126	Vps52	GARP complex subunit Vps52 (predicted)	FALSE
SPBC337.14	5	0.407	Rpb4	DNA-directed RNA polymerase II complex subunit Rpb4	FALSE
SPBC36.05c	5	0.151	Clr6	Clr6 complex. histone deacetylase (class I) Clr6	FALSE
SPBC3B9.12	5	0.152	Trs23	TRAPP complex subunit Trs23 (predicted)	FALSE
SPBC3E7.11c	5	0.124	Spbc3E7.11C	DNAJ protein Caj1/Djp1-type (predicted)	FALSE
SPBC4.03c	5	0.0718	Spbc4.03C	COPII-coated vesicle component Sfb3 (predicted)	FALSE
SPBC460.02c	5	0.205	Spbc460.02C	eukaryotic translation elongation factor, glutathione S-transferase (predicted)	FALSE
SPBC4C3.03	5	0.192	Thr1	homoserine kinase Thr1 (predicted)	FALSE
SPBC56F2.04	5	0.0217	Utp20	U3 snoRNP protein Utp20 (predicted)	FALSE
SPBC660.13c	5	0.122	Ssb1	DNA replication factor A subunit Ssb1	FALSE
SPBC8D2.17	5	0.155	Gmh4	alpha-1,2-galactosyltransferase (predicted)	FALSE
SPCC1235.14	5	0.103	Ght5	hexose transmembrane transporter Ght5	FALSE
SPCC162.07	5	0.0741	Ent1	epsin	FALSE
SPCC24B10.11c	5	0.208	Tho7	THO complex subunit Tho7 (predicted)	FALSE
SPCC285.17	5	0.133	Spp27	RNA polymerase I upstream activation factor complex subunit Spp27	FALSE
SPCC364.01	5	0.209	Cif1	calnexin independence factor Cif1	FALSE
SPCC5E4.03c	5	0.114	Taf5	SAGA complex subunit/TATA-binding protein associated factor/transcription factor TFIID complex subunit Taf5	FALSE
SPCP1E11.11	5	0.0436	Puf6	Puf family RNA-binding protein Puf6 (predicted)	FALSE
SPAC1006.07	4	0.112	Spac1006.07	translation initiation factor eIF4A (predicted)	FALSE
SPAC11D3.02c	4	0.233	Spac11D3.02C	ELLA family acetyltransferase (predicted)	FALSE
SPAC12G12.03	4	0.0486	Cip2	RNA-binding protein Cip2	FALSE
SPAC12G12.06c	4	0.157	Rcl1	rRNA processing protein Rcl1 (predicted)	FALSE
SPAC15A10.02	4	0.0756	Taf12	transcription factor TFIID complex subunit A/ SAGA complex subunit Taf12	FALSE
SPAC1610.02c	4	0.245	Mrpl1	mitochondrial ribosomal protein subunit L1 (predicted)	FALSE
SPAC167.07c	4	0.0554	Hul5	HECT-type ubiquitin-protein ligase E3 (predicted)	FALSE
SPAC1687.03c	4	0.181	Rfc4	DNA replication factor C complex subunit Rfc4 (predicted)	FALSE
SPAC16A10.04	4	0.182	Rho4	Rho family GTPase Rho4	FALSE
SPAC17A2.03c	4	0.114	Vma6	V-type ATPase V0 subunit d (predicted)	FALSE
SPAC17A5.06	4	0.0647	Ptr8	transcription factor TFIIH complex ERCC-3 subunit Ptr8	FALSE
SPAC17C9.06	4	0.0779	Sam50	mitochondrial sorting and assembly machinery complex subunit Sam50 (predicted)	FALSE
SPAC17D4.01	4	0.192	Pex7	peroxin-7 (predicted)	FALSE
SPAC17H9.05	4	0.0871	Ebp2	rRNA processing protein Ebp2 (predicted)	FALSE
SPAC19G12.17	4	0.356	Erh1	enhancer of rudimentary homolog Erh1	FALSE
SPAC1B3.01c	4	0.228	Spac1B3.01C	uracil phosphoribosyltransferase (predicted)	FALSE
SPAC1F5.07c	4	0.11	Hem14	protoporphyrinogen oxidase Hem14 (predicted)	FALSE
SPAC222.09	4	0.0484	Seb1	RNA-binding protein Seb1	FALSE
SPAC22G7.09c	4	0.108	Nup45	nucleoporin Nup45	FALSE
SPAC24H6.11c	4	0.0553	Spac24H6.11C	sulfate transmembrane transporter (predicted)	FALSE
SPAC26H5.04	4	0.0507	Gid5	GID complex armadillo repeat subunit Gid5 (predicted)	FALSE
SPAC29A4.18	4	0.0974	Prw1	Clr6 complex. Histone deacetylase complex subunit Prw1	FALSE
SPAC2F7.05c	4	0.185	Tif5	translation initiation factor eIF5, Tif5(predicted)	FALSE
SPAC31A2.07c	4	0.079	Dbp10	ATP-dependent RNA helicase Dbp10 (predicted)	FALSE
SPAC31G5.19	4	0.0479	Abo1	ATPase with bromodomain protein (predicted)	FALSE
SPAC3A12.05c	4	0.0273	Taf2	TATA-binding protein associated factor Taf2 (predicted)	FALSE
SPAC3A12.11c	4	0.0799	Cwf2	RNA-binding protein Cwf2	FALSE
SPAC3H1.05	4	0.0928	Spac3H1.05	CAAX prenyl protease (predicted)	FALSE
SPAC4D7.04c	4	0.189	Rer2	cis-prenyltransferase	FALSE
SPAC589.04	4	0.192	Spac589.04	metaxin 1 (predicted)	FALSE
SPAC637.06	4	0.153	Gmh5	alpha-1,2-galactosyltransferase (predicted)	FALSE
SPAC806.02c	4	0.128	Spac806.02C	Par A family ATPase/WD repeat iron cluster assembly fusion protein (predicted)	FALSE
SPAP8A3.07c	4	0.177	Spap8A3.07C	phospho-2-dehydro-3-deoxyheptonate aldolase (predicted)	FALSE
SPAPYUG7.03c	4	0.0637	Mid2	medial ring protein Mid2	FALSE
SPBC1198.02	4	0.0926	Dea2	adenine deaminase Dea2	FALSE
SPBC1271.04c	4	0.183	Spbc1271.04C	eIF-5A-deoxyhypusine synthase (predicted)	FALSE
SPBC1271.12	4	0.0825	Kes1	oxysterol binding protein (predicted)	FALSE
SPBC13G1.02	4	0.121	Mpg2	mannose-1-phosphate guanyltransferase (predicted)	FALSE
SPBC1539.04	4	0.151	Tts1	tetra spanning protein 1, Tts1	FALSE
SPBC1539.10	4	0.139	Nop16	ribosome biogenesis protein Nop16 (predicted)	FALSE
SPBC1604.21c	4	0.0504	Ptr3	ubiquitin activating enzyme E1	FALSE
SPBC18H10.17c	4	0.189	Spbc18H10.17C	mitochondrial recombinase Mhr1 (predicted)	FALSE
SPBC1921.01c	4	0.417	Rpl35B	60S ribosomal protein L35a (predicted)	FALSE
SPBC211.05	4	0.412	Sap10	splicing factor 3B	FALSE
SPBC216.07c	4	0.0133	Tor2	phosphatidylinositol kinase Tor2	FALSE
SPBC21B10.05c	4	0.0828	Pop3	WD repeat protein Pop3	FALSE
SPBC21D10.09c	4	0.0255	Rkr1	RQC complex ubiquitin-protein ligase E3 Rkr1 (predicted)	FALSE
SPBC26H8.08c	4	0.123	Grn1	GTPase Grn1	FALSE
SPBC36B7.03	4	0.0753	Sec63	ER protein translocation subcomplex subunit Sec63 (predicted)	FALSE
SPBC36B7.09	4	0.0381	Gcn2	eIF2 alpha kinase Gcn2	FALSE
SPBC3E7.05c	4	0.0691	Spbc3E7.05C	human mitofilin ortholog (predicted)	FALSE
SPBC3H7.01	4	0.114	Spo14	GDP/GTP exchange factor, WD repeat protein Spo14	FALSE
SPBC3H7.04	4	0.114	Spbc3H7.04	supeoxide dismutase, mitochondrial ribosomal protein subunit (predicted)	FALSE
SPBC4B4.04	4	0.0573	Eif21	translation initiation factor eIF2A (predicted)	FALSE
SPBC56F2.08c	4	0.104	Spbc56F2.08C	RNA-binding protein (predicted)	FALSE
SPBC577.10	4	0.218	Pre4	20S proteasome complex subunit beta 7, Pre4 (predicted)	FALSE
SPBC651.01c	4	0.0966	Nog1	GTP binding protein Nog1 (predicted)	FALSE
SPBC713.02c	4	0.0434	Ubp15	ubiquitin C-terminal hydrolase Ubp15	FALSE
SPBC800.03	4	0.0873	Clr3	histone deacetylase (class II) Clr3	FALSE
SPBC839.16	4	0.0576	Thf1	C1-5,6,7,8-tetrahydrofolate (THF) synthase, trifunctional enzyme Thf1	FALSE
SPBC887.17	4	0.0592	Spbc887.17	transmembrane transporter (predicted)	FALSE
SPBC947.14c	4	0.35	Cbp6	mitochondrial respiratory chain complex assembly protein Cbp6 (predicted)	FALSE
SPCC1223.05c	4	0.22	Rpl3702	60S ribosomal protein L37 (predicted)	FALSE
SPCC126.15c	4	0.108	Sec65	signal recognition particle subunit Sec65 (predicted)	FALSE
SPCC1322.05c	4	0.0441	Spcc1322.05C	leukotriene A-4 hydrolase (predicted)	FALSE
SPCC1442.06	4	0.286	Pre8	20S proteasome complex subunit alpha 2, Pre8 (predicted)	FALSE
SPCC162.09c	4	0.0361	Hmg1	3-hydroxy-3-methylglutaryl-CoA reductase Hmg1	FALSE
SPCC1795.02c	4	0.0631	Vcx1	CaCA proton/calcium exchanger (predicted)	FALSE
SPCC1840.08c	4	0.0909	Pdi5	protein disulfide isomerase (predicted)	FALSE
SPCC188.06c	4	0.0977	Srp54	signal recognition particle subunit Srp54	FALSE
SPCC584.15c	4	0.113	Spcc584.15C	arrestin involved in ubiquitin-dependent endocytosis	FALSE
SPCC74.06	4	0.0222	Mak3	histidine kinase Mak3	FALSE
SPCC962.01	4	0.0525	Spcc962.01	C2 domain endoplasmic reticulum membrane organization protein (predicted)	FALSE
SPCP1E11.05c	4	0.0975	Are2	acyl-coA-sterol acyltransferase Are2 (predicted)	FALSE
SPAC1006.06	3	0.0302	Rgf2	RhoGEF Rgf2	FALSE
SPAC12B10.02c	3	0.157	Spac12B10.02C	endoplasmic reticulum resident protein required for packaging into COPII vesicles (predicted)	FALSE
SPAC13D6.02c	3	0.173	Byr3	translational activator, zf-CCHC type zinc finger protein (predicted)	FALSE
SPAC13G6.03	3	0.0475	Gpi7	GPI anchor biosynthesis protein Gpi7 (predicted)	FALSE
SPAC17A5.13	3	0.162	Fol2	GTP cyclohydrolase Fol2 (predicted)	FALSE
SPAC17G8.04c	3	0.204	Arc5	ARP2/3 actin-organizing complex subunit Arc5	FALSE
SPAC17G8.08c	3	0.136	Spac17G8.08C	human TMEM165 homolog, implicated in calcium tranport	FALSE
SPAC17G8.14c	3	0.0415	Pck1	protein kinase C (PKC)-like Pck1	FALSE
SPAC1952.09c	3	0.0518	Spac1952.09C	acetyl-CoA hydrolase (predicted)	FALSE
SPAC23C11.14	3	0.0646	Zhf1	zinc ion transmembrane transporter Zhf1	FALSE
SPAC24H6.03	3	0.0395	Cul3	cullin 3	FALSE
SPAC24H6.13	3	0.039	Spac24H6.13	DUF221 family protein implicated in Golgi to plasma membrane transport (predicted)	FALSE
SPAC25B8.03	3	0.11	Psd2	phosphatidylserine decarboxylase Psd2	FALSE
SPAC27D7.14c	3	0.0414	Tpr1	RNA polymerase II associated Paf1 complex subunit Tpr1	FALSE
SPAC27E2.03c	3	0.148	Spac27E2.03C	Obg-Like ATPase (predicted)	FALSE
SPAC2G11.14	3	0.0603	Taf111	transcription factor TFIID complex subunit Taf111	FALSE
SPAC30C2.02	3	0.167	Mmd1	deoxyhypusine hydroxylase (predicted)	FALSE
SPAC31A2.09c	3	0.0807	Apm4	AP-2 adaptor complex subunit Apm4 (predicted)	FALSE
SPAC31A2.16	3	0.0391	Gef2	RhoGEF Gef2	FALSE
SPAC3A11.10c	3	0.139	Spac3A11.10C	dipeptidyl peptidase (predicted)	FALSE
SPAC3A12.17c	3	0.139	Cys12	cysteine synthase-like protein Cys12	FALSE
SPAC3G6.03c	3	0.224	Spac3G6.03C	Maf-like protein	FALSE
SPAC4A8.07c	3	0.0895	Lcb4	sphingoid long chain base kinase (predicted)	FALSE
SPAC4H3.03c	3	0.0616	Spac4H3.03C	glucan 1,4-alpha-glucosidase (predicted)	FALSE
SPAC57A10.07	3	0.125	Spac57A10.07	conserved protein (fungal and protozoan)	FALSE
SPAC57A7.08	3	0.068	Pzh1	serine/threonine protein phosphatase Pzh1	FALSE
SPAC644.14c	3	0.159	Rad51	RecA family recombinase Rad51/Rhp51	FALSE
SPAC6F12.05c	3	0.0615	Tnr3	thiamine diphosphokinase Tnr3/ Nudix hydrolase fusion protein	FALSE
SPAC8C9.12c	3	0.106	Spac8C9.12C	mitochondrial iron ion transmembrane transporter (predicted)	FALSE
SPAC926.06c	3	0.0934	Spac926.06C	leucine-rich repeat protein, unknown role	FALSE
SPAP27G11.10c	3	0.0185	Nup184	nucleoporin Nup184	FALSE
SPBC106.16	3	0.212	Pre6	20S proteasome complex subunit alpha 4 Pre6	FALSE
SPBC1105.01	3	0.048	Spbc1105.01	rRNA processing protein Rrp12-like (predicted)	FALSE
SPBC1105.03c	3	0.135	Mrpl1601	mitochondrial ribosomal protein subunit L16 (predicted)	FALSE
SPBC11B10.07c	3	0.0809	Ivn1	CDC50 domain protein, implicated in signal transduction (predicted)	FALSE
SPBC11C11.02	3	0.0776	Imp2	contractile ring protein Imp2	FALSE
SPBC1271.02	3	0.0638	Stt3	oligosaccharyltransferase subunit Stt3	FALSE
SPBC12D12.01	3	0.0875	Sad1	spindle pole body protein Sad1	FALSE
SPBC1347.05c	3	0.0955	Spbc1347.05C	DNAJ domain protein Scj1 (predicted)	FALSE
SPBC1683.11c	3	0.0888	Spbc1683.11C	isocitrate lyase (predicted)	FALSE
SPBC1685.14c	3	0.0462	Spbc1685.14C	Vid27 family protein	FALSE
SPBC16E9.05	3	0.127	Erg6	sterol 24-C-methyltransferase Erg6	FALSE
SPBC16E9.10c	3	0.0462	Rix7	AAA family ATPase Rix7 (predicted)	FALSE
SPBC16H5.06	3	0.123	Rip1	ubiquinol-cytochrome-c reductase complex subunit 5	FALSE
SPBC1703.15c	3	0.0726	Vps33	HOPS/CORVET complex subunit, vacuolar sorting protein Vps33	FALSE
SPBC1706.03	3	0.0712	Fzo1	mitochondrial dynamin family fusion GTPase protein (predicted)	FALSE
SPBC1709.17	3	0.0653	Spbc1709.17	folylpolyglutamate synthase (predicted)	FALSE
SPBC17A3.01c	3	0.0951	Tim50	TIM23 translocase complex subunit Tim50 (predicted)	FALSE
SPBC19C2.14	3	0.196	Smd3	Sm snRNP core protein Smd3	FALSE
SPBC19G7.14c	3	0.0779	Cog5	Golgi transport complex subunit Cog5 (predicted)	FALSE
SPBC215.08c	3	0.0586	Arg4	arginine specific carbamoyl-phosphate synthase Arg4 (predicted)	FALSE
SPBC23G7.15c	3	0.436	Rpp202	60S acidic ribosomal protein A4	FALSE
SPBC28F2.03	3	0.179	Ppi1	cyclophilin family peptidyl-prolyl cis-trans isomerase Cyp2	FALSE
SPBC28F2.11	3	0.135	Hmo1	HMG box protein Hmo1	FALSE
SPBC29B5.02c	3	0.0484	Isp4	OPT oligopeptide transmembrane transporter family Isp4	FALSE
SPBC2G2.02	3	0.053	Syj1	inositol-polyphosphate 5-phosphatase (synaptojanin homolog 1)	FALSE
SPBC2G2.07c	3	0.124	Mug178	mitochondrial ribosomal protein subunit L51-b (predicted)	FALSE
SPBC2G2.12	3	0.0657	Hrs1	mitochondrial and cytoplasmic histidine-tRNA ligase Hrs1 (predicted)	FALSE
SPBC30B4.05	3	0.0558	Kap109	karyopherin Kap109	FALSE
SPBC354.15	3	0.0558	Fap1	L-pipecolate oxidase	FALSE
SPBC359.03c	3	0.0674	Aat1	amino acid transmembrane transporter Aat1	FALSE
SPBC365.12c	3	0.0833	Ish1	LEA domain protein	FALSE
SPBC3E7.02c	3	0.147	Hsp16	heat shock protein Hsp16	FALSE
SPBC409.19c	3	0.124	Spbc409.19C	metaxin (predicted)	FALSE
SPBC428.05c	3	0.0878	Arg12	argininosuccinate synthase Arg12	FALSE
SPBC428.14	3	0.131	Spbc428.14	1-acylglycerol-3-phosphate acyltransferase (predicted)	FALSE
SPBC4B4.02c	3	0.0785	Nca2	mitochondrial protein Nca2 (predicted)	FALSE
SPBC4C3.10c	3	0.142	Pre3	20S proteasome complex subunit beta 1 Pre3 (predicted)	FALSE
SPBC577.04	3	0.155	Spbc577.04	human THOC5 ortholog (predicted)	FALSE
SPBC646.02	3	0.0358	Cwf11	complexed with Cdc5 protein Cwf11	FALSE
SPBC646.12c	3	0.0366	Gap1	GTPase activating protein Gap1	FALSE
SPBC651.11c	3	0.0941	Apm3	AP-3 adaptor complex subunit Apm3 (predicted)	FALSE
SPBC691.02c	3	0.0767	Drp1	RINT1 family protein (predicted)	FALSE
SPBC83.14c	3	0.106	Rfc5	DNA replication factor C complex subunit Rfc5 (predicted)	FALSE
SPBC8D2.14c	3	0.175	Sed5	SNARE Sed5 (predicted)	FALSE
SPBC8D2.15	3	0.0784	Lip5	mitochondrial lipoic acid synthetase Lip5 (predicted)	FALSE
SPBPB2B2.01	3	0.0547	Spbpb2B2.01	amino acid transmembrane transporter (predicted)	FALSE
SPCC1020.06c	3	0.14	Tal1	transaldolase (predicted)	FALSE
SPCC1442.05c	3	0.147	Mic26	MICOS complex subunit Mic26 (predicted)	FALSE
SPCC1442.19	3	0.222	Mrp49	mitochondrial ribosomal protein Mrp49 (predicted)	FALSE
SPCC1494.07	3	0.034	Spcc1494.07	tRNA 2'-O-methylase subunit Trm72 (predicted)	FALSE
SPCC16A11.14	3	0.175	Sfh1	RSC complex subunit Sfh1	FALSE
SPCC16C4.18c	3	0.0973	Taf6	histone H4-like TAF Taf6, SAGA complex subunit	FALSE
SPCC1739.10	3	0.14	Mug33	Tea1-interacting protein involved in exocytosis	FALSE
SPCC1739.11c	3	0.0344	Cdc11	SIN component scaffold protein, centriolin ortholog Cdc11	FALSE
SPCC1827.05c	3	0.0978	Spcc1827.05C	nucleolar RNA-binding protein NIFK (predicted)	FALSE
SPCC1840.06	3	0.181	Atp5	F0-ATPase delta subunit (predicted)	FALSE
SPCC1840.07c	3	0.0813	Spcc1840.07C	phosphoprotein phosphatase (predicted)	FALSE
SPCC188.08c	3	0.037	Ubp5	ubiquitin C-terminal hydrolase Ubp5	FALSE
SPCC18B5.05c	3	0.141	Spcc18B5.05C	phosphomethylpyrimidine kinase (predicted)	FALSE
SPCC290.03c	3	0.0194	Nup186	nucleoporin Nup186	FALSE
SPCC364.05	3	0.0516	Vps3	CORVET complex subunit, GTPase regulator Vps3 (predicted)	FALSE
SPCC4G3.12c	3	0.0402	Spcc4G3.12C	ubiquitin-protein ligase E3 (predicted)	FALSE
SPCC553.09c	3	0.0906	Spb70	DNA polymerase alpha B-subunit	FALSE
SPCC63.12c	3	0.132	Pup3	20S proteasome complex subunit beta 3, Pup3 (predicted)	FALSE
SPCC645.06c	3	0.0392	Rgf3	RhoGEF Rgf3	FALSE
SPCC663.03	3	0.036	Pmd1	leptomycin transmembrane transporter Pmd1	FALSE
SPCC74.01	3	0.0861	Sly1	SNARE binding protein Sly1 (predicted)	FALSE
SPCC757.15	3	0.406	Cox14	cytochrome c oxidase assembly protein Cox14 (predicted)	FALSE
SPCC830.11c	3	0.286	Fap7	nucleoside-triphosphatase involved in SSU-rRNA maturation Fap7 (predicted)	FALSE
SPCC970.09	3	0.0438	Sec8	exocyst complex subunit Sec8	FALSE
SPCP1E11.07c	3	0.232	Cwf18	complexed with Cdc5 protein Cwf18	FALSE
SPAC10F6.13c	2	0.0807	Spac10F6.13C	aspartate aminotransferase (predicted)	FALSE
SPAC1142.06	2	0.079	Get3	GET complex ATPase subunit Get3 (predicted)	FALSE
SPAC11H11.06	2	0.0846	Arp2	ARP2/3 actin-organizing complex subunit Arp2	FALSE
SPAC13F5.06c	2	0.0493	Sec10	exocyst complex subunit Sec10	FALSE
SPAC1486.07c	2	0.208	Mrpl19	mitochondrial ribosomal protein subunit L19 (predicted)	FALSE
SPAC1556.07	2	0.128	Pmm1	phosphomannomutase Pmm1	FALSE
SPAC1782.09c	2	0.0428	Clp1	Cdc14-related protein phosphatase Clp1/Flp1	FALSE
SPAC1786.01c	2	0.046	Ptl2	triacylglycerol lipase ptl2	FALSE
SPAC17C9.08	2	0.0963	Pnu1	mitochondrial endodeoxyribonuclease Pnu1	FALSE
SPAC17G6.13	2	0.0508	Slt1	Schizosaccharomyces specific protein Slt1	FALSE
SPAC1952.14c	2	0.172	Mrpl25	mitochondrial ribosomal protein subunit L25 (predicted)	FALSE
SPAC1B3.16c	2	0.0634	Vht1	vitamin H transmembrane transporter Vht1	FALSE
SPAC1F5.03c	2	0.0654	Spac1F5.03C	FAD-dependent oxidoreductase involved in late endosome to Golgi transport (predicted)	FALSE
SPAC1F7.03	2	0.0423	Pkd2	TRP-like ion channel Pkd2	FALSE
SPAC1F7.07c	2	0.0781	Fip1	iron permease Fip1	FALSE
SPAC20G8.04c	2	0.0696	Cir2	mitochondrial electron transfer flavoprotein-ubiquinone oxidoreductase Cir2 (predicted)	FALSE
SPAC22A12.06c	2	0.0699	Spac22A12.06C	serine hydrolase-like	FALSE
SPAC22E12.13c	2	0.13	Rlp24	ribosomal L24-like protein involved in ribosome biogenesis Rlp24 (predicted)	FALSE
SPAC23A1.03	2	0.138	Apt1	adenine phosphoribosyltransferase (APRT) (predicted)	FALSE
SPAC23A1.18c	2	0.152	Mrp51	mitochondrial ribosomal protein subunit L51-b (predicted)	FALSE
SPAC23D3.10c	2	0.0467	Eng2	endo-1,3-beta-glucanase Eng2	FALSE
SPAC24C9.09	2	0.0612	Spac24C9.09	mitochondrial threonine-tRNA ligase (predicted)	FALSE
SPAC26H5.09c	2	0.0813	Spac26H5.09C	oxidoreductase involved in NADPH regeneration (predicted)	FALSE
SPAC27E2.10c	2	0.0877	Rfc3	DNA replication factor C complex subunit Rfc3	FALSE
SPAC2F3.06c	2	0.033	Kap104	karyopherin Kap104	FALSE
SPAC2F7.11	2	0.0643	Nrd1	RNA-binding protein Nrd1	FALSE
SPAC343.04c	2	0.073	Gid7	GID complex subunit Gid7 (predicted)	FALSE
SPAC3G9.16c	2	0.206	Bet5	TRAPP complex subunit Bet5 (predicted)	FALSE
SPAC4F10.20	2	0.228	Grx1	glutaredoxin Grx1	FALSE
SPAC4G9.08c	2	0.0249	Rpc2	DNA-directed RNA polymerase III complex subunit Rpc2	FALSE
SPAC521.03	2	0.12	Spac521.03	short chain dehydrogenase (predicted)	FALSE
SPAC637.13c	2	0.0904	Slm1	cytoskeletal signaling protein Slm1 (predicted)	FALSE
SPAC644.11c	2	0.0894	Pkp1	mitochondrial pyruvate dehydrogenase (lipoamide) kinase Pkp1 (predicted)	FALSE
SPAC644.12	2	0.0436	Cdc5	splicing factor, Prp19 complex subunit Cdc5	FALSE
SPAC664.06	2	0.1	Rlp7	ribosomal protein L7-like Rlp7 involved in ribosome biogenesis (predicted)	FALSE
SPAC694.05c	2	0.124	Rps2502	40S ribosomal protein S25 (predicted)	FALSE
SPAC6F12.14	2	0.0584	Cut23	anaphase-promoting complex, TPR lobe subcomplex subunit Apc8	FALSE
SPAC6F6.10c	2	0.0757	Arc2	ARP2/3 actin-organizing complex subunit Arc34	FALSE
SPAC6G10.08	2	0.0615	Idp1	isocitrate dehydrogenase Idp1 (predicted)	FALSE
SPAC9.03c	2	0.0129	Brr2	U5 snRNP complex subunit Brr2	FALSE
SPAPB1A11.04c	2	0.0273	Mca1	transcription factor, zf-fungal binuclear cluster type Mca1 (predicted)	FALSE
SPBC106.09	2	0.0233	Cut4	anaphase-promoting complex, platform subcomplex scaffold subunit Apc1	FALSE
SPBC115.01c	2	0.159	Rrp46	exosome subunit Rrp46	FALSE
SPBC119.09c	2	0.183	Spbc119.09C	ORMDL family protein (predicted)	FALSE
SPBC119.17	2	0.0323	Spbc119.17	mitochondrial metalloendopeptidase (predicted)	FALSE
SPBC11G11.02c	2	0.12	End3	actin cortical patch component End3 (predicted)	FALSE
SPBC1215.02c	2	0.0395	Naa25	NatB N-acetyltransferase complex regulatory subunit Naa25	FALSE
SPBC1271.07c	2	0.16	Spbc1271.07C	N-acetyltransferase (predicted)	FALSE
SPBC12C2.04	2	0.0781	Spbc12C2.04	NAD binding dehydrogenase family protein	FALSE
SPBC12C2.08	2	0.0384	Dnm1	mitochondrial dynamin family GTPase Dnm1	FALSE
SPBC13G1.13	2	0.0783	Tfb2	transcription factor TFIIH complex subunit Tfb2	FALSE
SPBC146.13c	2	0.0263	Myo1	myosin type I	FALSE
SPBC14C8.15	2	0.0696	Spbc14C8.15	triglyceride lipase-cholesterol esterase (predicted)	FALSE
SPBC14F5.09c	2	0.0726	Ade8	adenylosuccinate lyase Ade8	FALSE
SPBC15D4.14	2	0.0421	Taf73	transcription factor TFIID complex subunit Taf5-like	FALSE
SPBC16A3.04	2	0.159	Rsm25	mitochondrial ribosomal protein subunit Rsm25 (predicted)	FALSE
SPBC16A3.05c	2	0.0909	Rae1	RNA export factor, nucleoporin Rae1	FALSE
SPBC16C6.12c	2	0.083	Las1	Las1 pre-rRNA processing protein	FALSE
SPBC16D10.03	2	0.107	Pgp2	EKC/KEOPS complex ATPase subunit Pgp2	FALSE
SPBC1718.05	2	0.148	Trs31	TRAPP complex subunit Trs31 (predicted)	FALSE
SPBC1734.03	2	0.0396	Fol1	trifunctional dihydropteroatesynthase/2-amino-4-hydroxy-6-hydro xymethyldihydropteridinediphosphokinase/dihydroneopterin aldolase Fol1 (predicted)	FALSE
SPBC1734.15	2	0.0646	Rsc4	RSC complex subunit Rsc4	FALSE
SPBC17A3.02	2	0.336	Spbc17A3.02	conserved fungal protein	FALSE
SPBC17G9.08c	2	0.0333	Cnt5	Centaurin Cnt5	FALSE
SPBC19C7.02	2	0.0133	Ubr1	N-end-recognizing protein, UBR ubiquitin-protein ligase E3 Ubr1	FALSE
SPBC19C7.03	2	0.0266	Cyr1	adenylate cyclase	FALSE
SPBC19F5.02c	2	0.0437	Utp4	U3 snoRNP protein Utp4 (predicted)	FALSE
SPBC19F5.05c	2	0.0478	Ppp1	pescadillo-family BRCT domain protein Ppp1 (predicted)	FALSE
SPBC1E8.03c	2	0.0797	Spbc1E8.03C	conserved fungal protein	FALSE
SPBC211.01	2	0.215	Rsm10	mitochondrial ribosomal protein subunit S10 (predicted)	FALSE
SPBC211.03c	2	0.0233	Gea1	guanyl-nucleotide exchange factor (predicted)	FALSE
SPBC23E6.07c	2	0.0257	Rfc1	DNA replication factor C complex subunit Rfc1	FALSE
SPBC25H2.07	2	0.203	Tif11	translation initiation factor eIF1A	FALSE
SPBC29A3.01	2	0.0487	Ccc2	copper transporting ATPase Ccc2 (predicted)	FALSE
SPBC29A3.07c	2	0.219	Sap14	U2 snRNP-associated protein SF3B14 Sap14	FALSE
SPBC29A3.09c	2	0.0557	Gcn20	AAA family ATPase Gcn20 (predicted)	FALSE
SPBC31E1.02c	2	0.0489	Pmr1	P-type ATPase, calcium transporting Pmr1	FALSE
SPBC31F10.07	2	0.112	Lsb5	cortical component Lsb5 (predicted)	FALSE
SPBC32F12.02	2	0.116	Rec14	Ski complex subunit Rec14	FALSE
SPBC336.02	2	0.101	Spbc336.02	18S rRNA dimethylase (predicted)	FALSE
SPBC3B9.03	2	0.0622	Srp101	signal recognition particle receptor alpha subunit Srp101 (predicted)	FALSE
SPBC418.01c	2	0.0665	His4	imidazoleglycerol-phosphate synthase (predicted)	FALSE
SPBC4C3.12	2	0.0513	43709	forkhead transcription factor Sep1	FALSE
SPBC4F6.16c	2	0.0899	Ero11	ER oxidoreductin Ero1a	FALSE
SPBC800.06	2	0.0814	Brx1	ribosome biogenesis protein Brx1 (predicted)	FALSE
SPBC887.12	2	0.0326	Spbc887.12	P-type ATPase (predicted)	FALSE
SPBC887.13c	2	0.0822	Cem1	3-oxoacyl-[acyl-carrier-protein]-synthase condensing enzyme Cem1 (predicted)	FALSE
SPBC8D2.10c	2	0.0589	Rmt3	type I ribosomal protein arginine N-methyltransferase Rmt3	FALSE
SPBC9B6.08	2	0.1	Clc1	clathrin light chain	FALSE
SPBP4H10.17c	2	0.0733	Spbp4H10.17C	carboxyl methyl esterase (predicted)	FALSE
SPCC11E10.06c	2	0.0831	Elp4	elongator complex subunit Elp4 (predicted)	FALSE
SPCC1450.04	2	0.14	Tef5	translation elongation factor EF-1 beta subunit, guanyl-nucleotide exchange factor (eEF1B)	FALSE
SPCC1672.07	2	0.0432	Spcc1672.07	U3 snoRNP-associated protein Utp21 (predicted)	FALSE
SPCC1672.08c	2	0.0912	Tfa2	transcription factor TFIIE beta subunit, TFIIEB, Tfa2	FALSE
SPCC24B10.17	2	0.131	Emp24	COPII-coated vesicle component Emp24 (predicted)	FALSE
SPCC306.03c	2	0.0431	Cnd2	condensin complex non-SMC subunit Cnd2	FALSE
SPCC550.15c	2	0.067	Spcc550.15C	ribosome biogenesis protein (predicted)	FALSE
SPCC553.06	2	0.122	Swp1	oligosaccharyltransferase delta subunit Swp1 (predicted)	FALSE
SPCC576.01c	2	0.0751	Xan1	alpha ketoglutarate dependent xanthine dioxygenase Xan1	FALSE
SPCC584.05	2	0.0606	Sec1	SNARE binding protein Sec1 (predicted)	FALSE
SPCC594.02c	2	0.0552	Spcc594.02C	conserved fungal protein	FALSE
SPCC5E4.06	2	0.0289	Smc6	Smc5-6 complex SMC subunit Smc6	FALSE
SPCC622.10c	2	0.0454	Sec5	exocyst complex subunit Sec5 (predicted)	FALSE
SPCC63.03	2	0.0441	Spcc63.03	DNAJ domain protein, DNAJC11 family	FALSE
SPCC645.08c	2	0.0353	Snd1	RNA-binding protein, involved in chromatin silencing by small RNA, Snd1	FALSE
SPCC895.07	2	0.042	Alp14	TOG/XMAP14 family protein Alp14	FALSE
SPCC965.06	2	0.105	Osr2	aldo-keto reductase (predicted)	FALSE
SPCP25A2.03	2	0.0359	Tho1	THO complex subunit Tho1 (predicted)	FALSE
					FALSE
SPBC25H2.12c	110	0.59	Cct7	chaperonin-containing T-complex eta subunit Cct7	FALSE
SPAPB1E7.07	97	0.287	Glt1	glutamate synthase Glt1 (predicted)	FALSE
SPBC16C6.13c	131	0.572	Sec27	coatomer beta' subunit (predicted)	FALSE
SPBC106.06	98	0.533	Cct4	chaperonin-containing T-complex delta subunit Cct4	FALSE
SPBC17D11.05	62	0.295	Tif32	translation initiation factor eIF3a	FALSE
SPBC8D2.18c	62	0.515	Spbc8D2.18C	adenosylhomocysteinase (predicted)	FALSE
SPBP19A11.03c	58	0.332	Mts4	19S proteasome regulatory subunit Mts4	FALSE
SPAC31F12.01	86	0.152	Zds1	zds family protein phosphatase type A regulator Zds1 (predicted)	FALSE
SPAC56E4.04c	102	0.309	Cut6	acetyl-CoA/biotin carboxylase	FALSE
SPAC1D4.04	152	0.615	Cct2	chaperonin-containing T-complex beta subunit Cct2	FALSE
SPAC3G9.03	139	0.554	Rpl2301	60S ribosomal protein L23	FALSE
SPAC4A8.16c	72	0.331	Tif33	translation initiation factor eIF3c	FALSE
SPAC1420.02c	106	0.538	Cct5	chaperonin-containing T-complex epsilon subunit Cct5	FALSE
SPCC1840.02c	34	0.151	Bgs4	1,3-beta-glucan synthase subunit Bgs4	FALSE
SPCC1906.01	34	0.38	Mpg1	mannose-1-phosphate guanyltransferase Mpg1	FALSE
SPCC584.01c	110	0.396	Spcc584.01C	sulfite reductase NADPH flavoprotein subunit (predicted)	FALSE
SPAC23C11.02c	61	0.566	Rps23	40S ribosomal protein S23 (predicted)	FALSE
SPCC31H12.07	29	0.203	Sec231	COPII cargo receptor subunit Sec23a (predicted)	FALSE
SPCC1494.10	43	0.229	Adn3	transcription factor (predicted)	FALSE
SPAC9E9.09c	42	0.529	Atd1	aldehyde dehydrogenase (predicted)	FALSE
SPBC30D10.13c	42	0.451	Pdb1	pyruvate dehydrogenase e1 component beta subunit Pdb1	FALSE
SPAC23G3.01	28	0.219	Rpb2	RNA polymerase II complex subunit Rpb2	FALSE
SPBC18H10.03	41	0.45	Tif35	translation initiation factor eIF3g	FALSE
SPBC12D12.03	95	0.574	Cct1	chaperonin-containing T-complex alpha subunit Cct1	FALSE
SPAC1834.02	27	0.163	Aro1	pentafunctional aromatic polypeptide Aro1 (predicted)	FALSE
SPCC576.08c	26	0.265	Rps2	40S ribosomal protein S2 (predicted)	FALSE
SPAC821.05	38	0.314	Tif38	translation initiation factor eIF3h (p40)	FALSE
SPAC11E3.15	49	0.393	Rpl22	60S ribosomal protein L22 (predicted)	FALSE
SPBC19F5.03	72	0.48	Sac11	inositol polyphosphate phosphatase (predicted)	FALSE
SPBC1289.10c	22	0.101	Adn2	transcription factor (predicted)	FALSE
SPBC14C8.02	22	0.337	Tim44	TIM23 translocase complex subunit Tim44 (predicted)	FALSE
SPBC337.05c	129	0.608	Cct8	chaperonin-containing T-complex theta subunit Cct8	FALSE
SPAC25B8.04c	31	0.341	Mss51	mitochondrial splicing suppressor Mss51 (predicted)	FALSE
SPBC11C11.09c	31	0.463	Rpl502	60S ribosomal protein L5	FALSE
SPCC576.10c	40	0.398	Rpt3	19S proteasome regulatory subunit Rpt3 (predicted)	FALSE
SPCP31B10.08c	30	0.417	Rpl35A	60S ribosomal protein L35a	FALSE
SPAC23A1.11	20	0.208	Rpl1602	60S ribosomal protein L13/L16 (predicted)	FALSE
SPAC18G6.05c	28	0.118	Gcn1	translation elongation regulator Gcn1 (predicted)	FALSE
SPAC3G9.09c	28	0.258	Tif211	translation initiation factor eIF2 alpha subunit	FALSE
SPAC57A10.12c	37	0.517	Ura3	dihydroorotate dehydrogenase Ura3	FALSE
SPBC365.03c	37	0.306	Rpl2101	60S ribosomal protein L21 (predicted)	FALSE
SPAC4G9.09c	18	0.151	Arg11	N-acetyl-gamma-glutamyl-phosphate reductase/acetylglutamate kinase	FALSE
SPBC428.15	18	0.333	Spbc428.15	Obg-like ATPase (predicted)	FALSE
SPAC3C7.08c	53	0.301	Elf1	AAA family ATPase Elf1	FALSE
SPAC4H3.10c	141	0.65	Pyk1	pyruvate kinase	FALSE
SPBC16A3.15c	17	0.303	Nda2	tubulin alpha 1	FALSE
SPAC4D7.05	67	0.686	Sum1	translation initiation factor eIF3i	FALSE
SPAC21E11.08	25	0.224	Lcb2	serine palmitoyltransferase Lcb2 (predicted)	FALSE
SPBC16G5.14c	49	0.494	Rps3	40S ribosomal protein S3 (predicted)	FALSE
SPAC22F8.08	32	0.205	Sec24	COPII cargo receptor Sec24/Sfb2 subunit	FALSE
SPBC1289.06c	16	0.304	Ppr8	mitochondrial PPR repeat protein Ppr8	FALSE
SPAC25G10.08	55	0.403	Spac25G10.08	translation initiation factor eIF3b (p84)	FALSE
SPAC3A11.12c	31	0.29	Rpt5	19S proteasome regulatory subunit Rpt5 (predicted)	FALSE
SPAC637.07	15	0.222	Moe1	translation initiation factor eIF3d Moe1	FALSE
SPCC1281.01	29	0.118	Ags1	alpha glucan synthase Ags1	FALSE
SPCC1682.16	29	0.438	Rpt4	19S proteasome regulatory subunit Rpt4 (predicted)	FALSE
SPBC4.07c	43	0.44	Rpt2	19S proteasome regulatory subunit Rpt2	FALSE
SPAPJ698.02c	21	0.387	Rps002	40S ribosomal protein S0B	FALSE
SPAC13A11.02c	27	0.362	Erg11	sterol 14-demethylase Erg11 (predicted)	FALSE
SPBC1703.13c	27	0.293	Spbc1703.13C	mitochondrial inorganic phosphate transmembrane transporter (predicted)	FALSE
SPBC1773.10c	33	0.437	Nrs1	cytoplasmic asparagine-tRNA ligase Nrs1 (predicted)	FALSE
SPAPB8E5.09	46	0.559	Rvb1	AAA family ATPase Rvb1	FALSE
SPAC328.10c	65	0.468	Rps502	40S ribosomal protein S5 (predicted)	FALSE
SPBC1289.07c	13	0.302	Rpc40	DNA-directed RNA polymerase I and III subunit Rpc40	FALSE
SPBC26H8.03	13	0.151	Cho2	phosphatidylethanolamine N-methyltransferase Cho2	FALSE
SPCC1223.09	13	0.443	Spcc1223.09	uricase (predicted)	FALSE
SPBC17A3.04c	51	0.398	Rar1	cytoplasmic methionine-tRNA ligase Mrs1 (predicted)	FALSE
SPAC26F1.03	31	0.513	Pda1	pyruvate dehydrogenase e1 component alpha subunit Pda1 (predicted)	FALSE
SPCC794.07	24	0.311	Lat1	dihydrolipoamide S-acetyltransferase E2, Lat1 (predicted)	FALSE
SPAC4F8.12c	18	0.0906	Spp42	U5 snRNP complex subunit Spp42	FALSE
SPAC24B11.12c	12	0.12	Spac24B11.12C	P-type ATPase (predicted)	FALSE
SPBC1A4.08c	70	0.536	Cct3	chaperonin-containing T-complex gamma subunit Cct3	FALSE
SPAC4F10.11	23	0.309	Spn1	mitotic septin Spn1	FALSE
SPAC1687.06c	39	0.433	Rpl44	60S ribosomal protein L28/L44 (predicted)	FALSE
SPBC19F8.08	39	0.435	Rps401	40S ribosomal protein S4 (predicted)	FALSE
SPBP8B7.03c	133	0.592	Rpl402	60S ribosomal protein L4 (predicted)	FALSE
SPBP23A10.07	22	0.212	Rpa2	DNA-directed RNA polymerase I complex subunit Rpa2	FALSE
SPAC23C4.15	11	0.305	Rpb5	DNA-directed RNA polymerase I, II and III subunit Rpb5	FALSE
SPBP16F5.08c	11	0.257	Spbp16F5.08C	flavin dependent monooxygenase (predicted)	FALSE
SPBC16A3.08c	43	0.43	Oga1	Stm1 homolog Oga1	FALSE
SPAC19A8.04	31	0.306	Erg5	C-22 sterol desaturase Erg5	FALSE
SPBC530.10c	41	0.339	Anc1	mitochondrial adenine nucleotide carrier Anc1	FALSE
SPAPB1E7.09	15	0.161	Ogm2	protein O-mannosyltransferase Ogm2	FALSE
SPBC17G9.11c	15	0.131	Pyr1	pyruvate carboxylase Pyr1	FALSE
SPBC215.12	15	0.137	Cwf10	U5 snRNP GTPase subunit Cwf10	FALSE
SPBC32F12.04	10	0.224	Gtb1	gamma-tubulin Gtb1	FALSE
SPCC757.09c	10	0.176	Rnc1	RNA-binding protein that suppresses calcineurin deletion Rnc1	FALSE
SPBC23G7.12c	44	0.529	Rpt6	19S proteasome regulatory subunit Rpt6 (predicted)	FALSE
SPAC1420.03	29	0.37	Rpn501	19S proteasome regulatory subunit Rpn501	FALSE
SPAC22G7.06c	86	0.269	Ura1	carbamoyl-phosphate synthase (glutamine hydrolyzing), aspartate carbamoyltransferase Ura1	FALSE
SPBC2F12.14c	43	0.42	Gua1	IMP dehydrogenase Gua1	FALSE
SPAC1805.13	38	0.403	Rpl14	60S ribosomal protein L14 (predicted)	FALSE
SPAC926.04c	19	0.24	Hsp90	Hsp90 chaperone	FALSE
SPAC31G5.13	14	0.344	Rpn11	19S proteasome regulatory subunit Rpn11	FALSE
SPAC6F12.17	14	0.157	Rna14	mRNA cleavage and polyadenylation specificity factor complex subunit Rna14 (predicted)	FALSE
SPCC576.09	14	0.407	Rps20	40S ribosomal protein S20 (predicted)	FALSE
SPCC16C4.13c	46	0.521	Rpl1201	60S ribosomal protein L12.1/L12A	FALSE
SPBC24C6.04	9	0.199	Spbc24C6.04	delta-1-pyrroline-5-carboxylate dehydrogenase (predicted)	FALSE
SPCC1827.03c	31	0.379	Spcc1827.03C	acetyl-CoA ligase (predicted)	FALSE
SPAC1751.03	35	0.299	Spac1751.03	translation initiation factor eIF3m	FALSE
SPBC18E5.02c	34	0.379	Spbc18E5.02C	serine palmitoyltransferase complex subunit (predicted)	FALSE
SPCC962.04	17	0.538	Rps1201	40S ribosomal protein S12 (predicted)	FALSE
SPBC16H5.02	29	0.293	Pfk1	6-phosphofructokinase pfk1	FALSE
SPAC664.04c	62	0.6	Rps1602	40S ribosomal protein S16 (predicted)	FALSE
SPBC1815.01	48	0.426	Eno101	enolase (predicted)	FALSE
SPAC9G1.09	12	0.255	Sid1	PAK-related GC kinase Sid1	FALSE
SPAC8F11.04	8	0.177	Spac8F11.04	U3 snoRNP-associated protein Cic1/Utp30 family (predicted)	FALSE
SPCP1E11.06	8	0.118	Apl4	AP-1 adaptor complex gamma subunit Apl4	FALSE
SPAC18G6.14c	89	0.595	Rps7	40S ribosomal protein S7 (predicted)	FALSE
SPCC584.04	27	0.239	Sup35	translation release factor class II eRF3	FALSE
SPBC4F6.18c	19	0.544	Arf1	ADP-ribosylation factor, Arf family Arf1	FALSE
SPBC887.10	11	0.257	Mcs4	response regulator Mcs4	FALSE
SPBC1D7.04	18	0.367	Mlo3	RNA binding protein Mlo3	FALSE
SPCC31H12.08c	18	0.238	Ccr4	CCR4-Not complex subunit Ccr4 (predicted)	FALSE
SPAC6B12.12	25	0.328	Tom70	mitochondrial TOM complex subunit Tom70 (predicted)	FALSE
SPAC6F6.07c	32	0.49	Rps13	40S ribosomal protein S13	FALSE
SPBC1734.11	42	0.349	Mas5	DNAJ domain protein Mas5 (predicted)	FALSE
SPAC19A8.15	14	0.208	Trp2	tryptophan synthase (predicted)	FALSE
SPCC1235.02	14	0.127	Bio2	biotin synthase	FALSE
SPAC15E1.03	7	0.189	Rpl42	60S ribosomal protein L36/L42	FALSE
SPCC1620.11	7	0.0834	Nup97	nucleoporin Nic96 homolog	FALSE
SPBC2D10.10c	17	0.262	Fib1	fibrillarin, rRNA methyltransferase	FALSE
SPAC1556.02c	30	0.339	Sdh1	succinate dehydrogenase Sdh1 (predicted)	FALSE
SPBC685.06	10	0.264	Rps001	40S ribosomal protein S0A (p40)	FALSE
SPBC660.11	53	0.39	Tcg1	single-stranded telomeric binding protein Tgc1	FALSE
SPBC17G9.09	23	0.399	Tif213	translation initiation factor eIF2 gamma subunit	FALSE
SPBP4H10.11c	36	0.27	Lcf2	long-chain-fatty-acid-CoA ligase	FALSE
SPAC3F10.03	26	0.261	Grs1	mitochondrial and cytoplasmic glycine-tRNA ligase Grs1	FALSE
SPAC29A4.02c	13	0.208	Spac29A4.02C	translation elongation factor EF-1 gamma subunit	FALSE
SPBC21D10.11c	13	0.341	Nfs1	mitochondrial cysteine desulfurase Nfs1 (predicted)	FALSE
SPBC776.09	13	0.282	Ste13	ATP-dependent RNA helicase Ste13	FALSE
SPBPB7E8.02	13	0.218	Spbpb7E8.02	PSP1 family protein	FALSE
SPAC23G3.06	16	0.309	Nop58	U3 snoRNP protein Nop58 (predicted)	FALSE
SPBC215.15	16	0.31	Sec13	COPII-coated vesicle component Sec13	FALSE
SPCC1672.05c	16	0.297	Yrs1	cytoplasmic tyrosine-tRNA ligase Yrs1 (predicted)	FALSE
SPAC30D11.12	19	0.459	Rpl3802	60S ribosomal protein L38 (predicted)	FALSE
SPAC222.12c	72	0.661	Atp2	F1-ATPase beta subunit Atp2	FALSE
SPBC1539.09c	15	0.198	Trp1	anthranilate synthase component II, multifunctional enzyme Trp1	FALSE
SPCC794.12c	15	0.246	Mae2	malic enzyme, malate dehydrogenase (oxaloacetate decarboxylating), Mae2	FALSE
SPBC646.07c	12	0.19	Tsc13	enoyl reductase (predicted)	FALSE
SPBC1734.04	9	0.188	Anp1	mannosyltransferase complex subunit, Anp family (predicted)	FALSE
SPAC1071.06	6	0.155	Arp9	SWI/SNF and RSC complex subunit Arp9	FALSE
SPAC23C11.05	6	0.246	Ipp1	inorganic pyrophosphatase Ipp1 (predicted)	FALSE
SPAC644.17c	6	0.185	Mrpl9	mitochondrial ribosomal protein subunit L9 (predicted)	FALSE
SPAPB2B4.04c	6	0.0542	Spapb2B4.04C	vacuolar calcium transporting P-type ATPase P2 type, Pmc1	FALSE
SPAPJ696.02	6	0.156	Lsb4	actin cortical patch component Lsb4 (predicted)	FALSE
SPBC14F5.06	6	0.113	Rli1	iron-sulfur ATPase involved in ribosome biogenesis and translation Rli1 (predicted)	FALSE
SPBC16D10.08c	6	0.112	Hsp104	heat shock protein Hsp104 (predicted)	FALSE
SPCC4G3.15c	6	0.235	Not2	CCR4-Not complex subunit Not2 (predicted)	FALSE
SPCC825.01	6	0.123	Spcc825.01	ATPase, involved in cytoplasmic translational initiation (predicted)	FALSE
SPBC800.04c	32	0.383	Rpl4301	60S ribosomal protein L37a (predicted)	FALSE
SPBC32H8.12c	168	0.677	Act1	actin Act1	FALSE
SPBC14F5.05c	23	0.401	Sam1	S-adenosylmethionine synthetase	FALSE
SPAC1565.08	17	0.189	Cdc48	AAA family ATPase involved in ubiquitin-mediated protein degradation Cdc48	FALSE
SPCC622.18	135	0.518	Rpl6	60S ribosomal protein L6 (predicted)	FALSE
SPAC1071.10c	104	0.346	Pma1	P-type proton ATPase, P3-type Pma1	FALSE
SPAC17A2.13c	28	0.619	Rad25	14-3-3 protein Rad25	FALSE
SPAC23D3.08	11	0.202	Usp108	U1 snRNP-associated protein Usp108	FALSE
SPBC14C8.16c	11	0.267	Bot1	mitochondrial ribosomal protein subunit S35	FALSE
SPBC31F10.06c	11	0.484	Sar1	ADP-ribosylation factor Sar1	FALSE
SPBC56F2.09c	72	0.513	Arg5	arginine specific carbamoyl-phosphate synthase subunit Arg5 (predicted)	FALSE
SPBC16C6.07c	32	0.418	Rpt1	19S proteasome regulatory subunit Rpt1 (predicted)	FALSE
SPAC6B12.15	8	0.299	Cpc2	RACK1 ortholog Cpc2	FALSE
SPAC26F1.06	13	0.384	Gpm1	monomeric 2,3-bisphosphoglycerate (BPG)-dependent phosphoglycerate mutase (PGAM), Gpm1	FALSE
SPACUNK4.07c	13	0.133	Cta4	P-type ATPase, calcium transporting Cta4	FALSE
SPBC106.03	18	0.356	Spbc106.03	DUF1776 family protein	FALSE
SPAC890.08	28	0.522	Rpl31	60S ribosomal protein L31 (predicted)	FALSE
SPAC1F7.05	40	0.274	Cdc22	ribonucleoside reductase large subunit Cdc22	FALSE
SPAC12B10.03	5	0.081	Bun62	WD repeat protein, human WDR20 family, Bun62	FALSE
SPAC12B10.16c	5	0.122	Mug157	conserved protein Mug157	FALSE
SPAC25H1.07	5	0.0576	Emc1	ER membrane protein complex subunit Emc1 (predicted)	FALSE
SPAC57A10.10c	5	0.138	Sla1	La protein homolog	FALSE
SPAC806.03c	5	0.375	Rps2601	40S ribosomal protein S26 (predicted)	FALSE
SPBC2G2.13c	5	0.134	Dcd1	deoxycytidylate deaminase (predicted)	FALSE
SPBC646.05c	5	0.122	Erg9	farnesyldiphosphate:farnesyldiphosphatefarnesyltransferase (squalene synthase) Erg9	FALSE
SPBC9B6.06	5	0.177	Mrpl10	mitochondrial ribosomal protein subunit L15 (predicted)	FALSE
SPCC1739.14	5	0.0761	Npp106	nucleoporin Npp106	FALSE
SPCC330.08	5	0.0934	Alg11	alpha-1,2-mannosyltransferase Alg11	FALSE
SPCC1795.11	47	0.458	Sum3	translation initiation RNA helicase Sum3	FALSE
SPBC83.08	42	0.437	Rvb2	AAA family ATPase Rvb2	FALSE
SPCC1223.07c	32	0.331	Drs1	cytoplasmic aspartate-tRNA ligase Drs1 (predicted)	FALSE
SPAC3H5.05c	29	0.424	Rps1401	40S ribosomal protein S14 (predicted)	FALSE
SPCC417.08	96	0.433	Tef3	translation elongation factor eEF3	FALSE
SPAC9G1.03c	38	0.633	Rpl3001	60S ribosomal protein L30 (predicted)	FALSE
SPBC17G9.07	38	0.425	Rps2402	40S ribosomal protein S24 (predicted)	FALSE
SPBC83.02c	19	0.372	Rpl4302	60S ribosomal protein L37a (predicted)	FALSE
SPAC1071.08	21	0.845	Rpp203	60S acidic ribosomal protein A2	FALSE
SPCC1281.06c	14	0.194	Spcc1281.06C	acyl-coA desaturase (predicted)	FALSE
SPCC306.08c	7	0.15	Mdh1	malate dehydrogenase Mdh1 (predicted)	FALSE
SPBP35G2.07	103	0.451	Ilv1	acetolactate synthase catalytic subunit	FALSE
SPBC18E5.04	43	0.493	Rpl1001	60S ribosomal protein L10	FALSE
SPAC227.18	9	0.188	Lys3	saccharopine dehydrogenase Lys3	FALSE
SPAC767.01c	9	0.133	Vps1	dynamin family protein Vps1	FALSE
SPCC970.03	9	0.243	Cbr1	cytochrome b5 reductase Cbr1 (predicted)	FALSE
SPBC16C6.11	29	0.457	Rpl3201	60S ribosomal protein L32	FALSE
SPBC646.10c	11	0.189	Nop56	U3 snoRNP protein Nop56 (predicted)	FALSE
SPAC32A11.04c	13	0.38	Tif212	translation initiation factor eIF2 beta subunit (predicted)	FALSE
SPCC576.03c	49	0.568	Tpx1	thioredoxin peroxidase Tpx1	FALSE
SPAC2E1P3.04	179	0.621	Cao1	copper amine oxidase Cao1	FALSE
SPAC9E9.03	48	0.46	Leu2	3-isopropylmalate dehydratase Leu2 (predicted)	FALSE
SPCC613.05c	30	0.41	Rpl35	60S ribosomal protein L35	FALSE
SPBC4C3.05c	14	0.0965	Nuc1	DNA-directed RNA polymerase I complex large subunit Nuc1	FALSE
SPCC18B5.01c	14	0.103	Bfr1	brefeldin A transmembrane transporter Bfr1	FALSE
SPAC139.02c	10	0.228	Oac1	mitochondrial anion transmembrane transporter (predicted)	FALSE
SPBC11B10.09	10	0.185	Cdc2	cyclin-dependent protein kinase Cdk1/Cdc2	FALSE
SPAC23A1.12c	8	0.17	Frs1	cytoplasmic phenylalanine-tRNA ligase beta subunit Frs1 (predicted)	FALSE
SPAC23H4.06	6	0.284	Gln1	glutamate-ammonia ligase Gln1	FALSE
SPAC26F1.13c	6	0.0513	Lrs1	cytoplasmic leucine-tRNA ligase Lrs1 (predicted)	FALSE
SPAC22E12.10c	4	0.0958	Etp1	mitochondrial type I (2Fe-2S) ferredoxin Etp1/ cytochrome oxidase cofactor Cox15, fusion protein	FALSE
SPBC1539.03c	4	0.0913	Arg41	argininosuccinate lyase (predicted)	FALSE
SPBC16G5.05c	4	0.117	Scs2	VAP family protein Scs2	FALSE
SPBC405.01	4	0.0698	Ade1	phosphoribosylamine-glycine ligase/phosphoribosylformylglycinamidine cyclo-ligase	FALSE
SPBC543.09	4	0.0841	Yta12	mitochondrial m-AAA protease Yta12 (predicted)	FALSE
SPBC725.09c	4	0.182	Hob3	BAR adaptor protein Hob3	FALSE
SPCC417.07c	4	0.0664	Mto1	MT organizer Mto1	FALSE
SPCC74.03c	4	0.0868	Ssp2	AMP-activated protein serine/threonine kinase alpha subunit Ssp2	FALSE
SPAC10F6.01c	45	0.268	Sir1	sulfite reductase Sir1	FALSE
SPBC776.11	29	0.622	Rpl2801	60S ribosomal protein L27/L28	FALSE
SPBC25H2.02	34	0.354	Trs1	cytoplasmic threonine-tRNA ligase Trs1 (predicted)	FALSE
SPBC56F2.02	17	0.301	Rpl1901	60S ribosomal protein L19	FALSE
SPBC29A10.01	15	0.224	Ccr1	NADPH-cytochrome p450 reductase	FALSE
SPCC1183.08c	29	0.338	Rpl101	60S ribosomal protein L10a	FALSE
SPBC11C11.06c	9	0.298	Spbc11C11.06C	Schizosaccharomyces specific protein	FALSE
SPBC16H5.12c	9	0.151	Spbc16H5.12C	conserved fungal protein	FALSE
SPBC660.16	9	0.159	Spbc660.16	phosphogluconate dehydrogenase, decarboxylating	FALSE
SPCC191.02c	9	0.205	Acs1	acetyl-CoA ligase (predicted)	FALSE
SPBC13A2.04c	7	0.108	Ptr2	PTR family peptide transmembrane transporter Ptr2	FALSE
SPBC106.18	36	0.44	Rpl2501	60S ribosomal protein L25 (predicted)	FALSE
SPAC4A8.11c	74	0.345	Fas2	fatty acid synthase alpha subunit Lsd1	FALSE
SPCC364.06	10	0.201	Nap1	nucleosome assembly protein Nap1	FALSE
SPBC13E7.03c	5	0.0631	Spbc13E7.03C	RNA hairpin binding protein (predicted)	FALSE
SPCC737.09c	5	0.0892	Hmt1	vacuolar transmembrane transporter Hmt1	FALSE
SPAC222.13c	33	0.323	Spac222.13C	6-phosphofructo-2-kinase (predicted)	FALSE
SPAC26A3.04	28	0.426	Rpl2002	60S ribosomal protein L20 (predicted)	FALSE
SPAC926.09c	52	0.214	Fas1	fatty acid synthase beta subunit Fas1	FALSE
SPAC10F6.03c	26	0.332	Cts1	CTP synthase Cts1 (predicted)	FALSE
SPAC6G10.02c	13	0.154	Tea3	cell end marker Tea3	FALSE
SPCC1620.08	8	0.219	Spcc1620.08	succinate-CoA ligase beta subunit (predicted)	FALSE
SPCC1620.06c	11	0.296	Spcc1620.06C	ribose-phosphate pyrophosphokinase (predicted)	FALSE
SPBC685.07c	55	0.522	Rpl2701	60S ribosomal protein L27	FALSE
SPBC1A4.02c	6	0.218	Leu1	3-isopropylmalate dehydrogenase Leu1	FALSE
SPBC26H8.06	6	0.225	Grx4	monothiol glutaredoxin Grx4	FALSE
SPBC56F2.07c	6	0.116	Spbc56F2.07C	ribosome biogenesis factor recycling AAA family ATPase (predicted)	FALSE
SPAC1805.11c	3	0.303	Rps2602	40S ribosomal protein S26 (predicted)	FALSE
SPAC23D3.02	3	0.103	Rfc2	DNA replication factor C complex subunit Rfc2	FALSE
SPBC11B10.01	3	0.0711	Alg2	mannosyltransferase complex subunit Alg2 (predicted)	FALSE
SPBC354.01	3	0.0937	Gtp1	GTP binding protein Gtp1, implicated in cytoplasmic translation (predicted)	FALSE
SPCC737.02c	3	0.336	Qcr7	ubiquinol-cytochrome-c reductase complex subunit 6 (predicted)	FALSE
SPCC18.14c	28	0.34	Rpp0	60S acidic ribosomal protein Rpp0 (predicted)	FALSE
SPAC30C2.04	19	0.3	Asc1	cofactor for cytoplasmic methionyl-and glutamyl-tRNA synthetases Asc1 (predicted)	FALSE
SPCC13B11.01	39	0.577	Adh1	alcohol dehydrogenase Adh1	FALSE
SPBC3D6.02	13	0.2	But2	But2 family protein But2	FALSE
SPBC26H8.07c	10	0.241	Nda3	tubulin beta Nda3	FALSE
SPAC24B11.06c	7	0.155	Sty1	MAP kinase Sty1	FALSE
SPAC24H6.07	7	0.241	Rps901	40S ribosomal protein S9	FALSE
SPBC16H5.08c	7	0.12	Spbc16H5.08C	ribosome biogenesis ATPase, Arb family ABCF2-like (predicted)	FALSE
SPCC364.03	41	0.471	Rpl1702	60S ribosomal protein L17 (predicted)	FALSE
SPBC1711.06	31	0.567	Rpl401	60S ribosomal protein L4 (predicted)	FALSE
SPAC17A5.15c	16	0.258	Gus1	cytoplasmic glutamate-tRNA ligase gus1 (predicted)	FALSE
SPAC26A3.07c	16	0.517	Rpl1101	60S ribosomal protein L11 (predicted)	FALSE
SPAC16.02c	4	0.159	Srp2	mRNA export factor Srp2	FALSE
SPAC1B3.05	4	0.0828	Not3	CCR4-Not complex subunit Not3/5 (predicted)	FALSE
SPAC24B11.07c	4	0.0677	Spac24B11.07C	oxidoreductase (predicted)	FALSE
SPBC1289.11	4	0.153	Spf38	U5 snRNP complex subunit Spf38	FALSE
SPBC13E7.04	4	0.293	Atp16	F1-ATPase delta subunit (predicted)	FALSE
SPBC25B2.09c	4	0.0825	Mrs1	mitochondrial and cytoplasmic arginine-tRNA ligase Rrs1/Mrs1 (predicted)	FALSE
SPBC2G2.04c	4	0.167	Mmf1	mitochondrial matrix protein, YjgF family protein Mmf1	FALSE
SPBC365.16	4	0.101	Spbc365.16	conserved protein	FALSE
SPBC4B4.07c	4	0.241	Usp102	U1 snRNP-associated protein Usp102	FALSE
SPBC646.16	4	0.168	Scl1	20S proteasome complex subunit alpha 1 (predicted)	FALSE
SPCC1739.12	4	0.161	Ppe1	serine/threonine protein phosphatase Ppe1	FALSE
SPBC29B5.03c	25	0.484	Rpl26	60S ribosomal protein L26 (predicted)	FALSE
SPBC3B8.03	25	0.436	Spbc3B8.03	saccharopine dehydrogenase (predicted)	FALSE
SPCC24B10.09	17	0.583	Rps1702	40S ribosomal protein S17 (predicted)	FALSE
SPAC17A5.03	42	0.397	Rpl301	60S ribosomal protein L3	FALSE
SPAC14C4.14	28	0.34	Atp1	F1-ATPase alpha subunit	FALSE
SPAC22A12.04c	20	0.531	Rps2201	40S ribosomal protein S15a (predicted)	FALSE
SPBP8B7.06	15	0.809	Rpp201	60S acidic ribosomal protein A2	FALSE
SPAC23H3.09c	5	0.17	Gly1	threonine aldolase Gly1 (predicted)	FALSE
SPAC17G6.06	22	0.425	Rps2401	40S ribosomal protein S24 (predicted)	FALSE
SPAC17H9.13c	11	0.299	Spac17H9.13C	glutamate 5-kinase (predicted)	FALSE
SPBC14F5.04c	11	0.285	Pgk1	phosphoglycerate kinase Pgk1 (predicted)	FALSE
SPBC2G5.05	17	0.206	Spbc2G5.05	transketolase (predicted)	FALSE
SPBC29A3.04	99	0.672	Rpl8	60S ribosomal protein L7a/L8 (predicted)	FALSE
SPAC17G6.15c	6	0.146	Spac17G6.15C	MTC tricarboxylate transmembrane transporter (predicted)	FALSE
SPAC3G9.06	6	0.166	Frs2	cytoplasmic phenylalanine-tRNA ligase alpha subunit Frs2 (predicted)	FALSE
SPBC25D12.03c	6	0.0947	Mcm7	MCM complex subunit Mcm7	FALSE
SPCC736.12c	6	0.191	Mmi1	YTH family RNA binding protein Mmi1	FALSE
SPAC343.16	7	0.121	Lys2	homoaconitate hydratase Lys2	FALSE
SPBC8E4.01c	8	0.124	Pho84	inorganic phosphate transmembrane transporter (predicted)	FALSE
SPBC18H10.12c	40	0.482	Rpl701	60S ribosomal protein L7	FALSE
SPAC1B2.05	10	0.21	Mcm5	MCM complex subunit Mcm5	FALSE
SPBC17D1.06	11	0.215	Dbp3	ATP-dependent RNA helicase Dbp3 (predicted)	FALSE
SPBC4F6.17c	12	0.163	Spbc4F6.17C	mitochondrial heatshock protein Hsp78 (predicted)	FALSE
SPBC1105.02c	40	0.416	Lys4	homocitrate synthase	FALSE
SPAC19G12.08	13	0.245	Scs7	sphingosine hydroxylase Scs7	FALSE
SPBC839.05c	12	0.565	Rps1701	40S ribosomal protein S17 (predicted)	FALSE
SPAPB17E12.13	10	0.257	Rpl1802	60S ribosomal protein L18 (predicted)	FALSE
SPBC4B4.09	10	0.165	Usp105	U1 snRNP-associated protein Usp105	FALSE
SPAC1834.01	6	0.196	Sup45	translation release factor eRF1	FALSE
SPAC1F3.07c	6	0.196	Rsc58	RSC complex subunit Rsc58	FALSE
SPAC24B11.08c	4	0.0769	Spac24B11.08C	COPII-coated vesicle component Erv46 (predicted)	FALSE
SPAC4F8.03	4	0.126	Sdo1	SBDS family ribosome maturation protein Sdo1 (predicted)	FALSE
SPBC1703.07	4	0.0927	Spbc1703.07	ATP citrate synthase subunit 1 (predicted)	FALSE
SPCC1620.14c	4	0.0381	Snf22	ATP-dependent DNA helicase Snf22	FALSE
SPCC24B10.21	4	0.257	Tpi1	triosephosphate isomerase	FALSE
SPCC550.14	4	0.0488	Vgl1	vigilin (predicted)	FALSE
SPAC11G7.03	3	0.138	Idh1	isocitrate dehydrogenase (NAD+) subunit 1 Idh1	FALSE
SPAC12G12.15	3	0.0551	Sif3	mitochondrial conserved protein (predicted)	FALSE
SPBC2D10.08c	3	0.134	Spbc2D10.08C	mitochondrial ribosomal protein subunit Yml6 (predicted)	FALSE
SPBC776.04	3	0.0575	Sec2302	COPII cargo receptor subunit Sec23b (predicted)	FALSE
SPAC26F1.10c	2	0.0436	Pyp1	tyrosine phosphatase Pyp1	FALSE
SPAC29A4.16	2	0.0472	Hal4	serine/threonine protein kinase Hal4	FALSE
SPAC4F8.02c	2	0.0932	Mrpl40	mitochondrial ribosomal protein subunit L40 (predicted)	FALSE
SPAC589.12	2	0.0391	Cwh43	glycosylceramide biosynthesis protein Cwh43 (predicted)	FALSE
SPBC1289.12	2	0.0959	Usp109	U1 snRNP-associated protein Usp109	FALSE
SPBC1685.10	2	0.205	Rps27	40S ribosomal protein S27 (predicted)	FALSE
SPBC1703.12	2	0.065	Ubp9	ubiquitin C-terminal hydrolase Ubp9	FALSE
SPBC244.02c	2	0.0656	Utp6	U3 snoRNP-associated protein Utp6 (predicted)	FALSE
SPBC3D6.13c	2	0.0455	Pdi3	ER associated protein disulfide isomerase Pdi3	FALSE
SPBC409.21	2	0.156	Sec66	ER protein translocation subcomplex subunit Sec66 (predicted)	FALSE
SPCC1183.07	2	0.016	Rrp5	U3 snoRNP-associated protein Rrp5 (predicted)	FALSE
SPCC16C4.01	2	0.0733	Sif2	mitochondrial conserved protein (predicted)	FALSE
SPCC338.07c	2	0.0412	Naa15	NatA N-acetyltransferase complex regulatory subunit Naa15 (predicted)	FALSE
SPAC31A2.14	17	0.166	Bun107	WD repeat protein, human WDR48 family Bun107	FALSE
SPBC9B6.04c	14	0.246	Tuf1	mitochondrial translation elongation factor EF-Tu Tuf1	FALSE
SPAPB17E12.14c	27	0.268	Spapb17E12.14C	6-phosphofructo-2-kinase/fructose-2,6-bisphosphate 2-phosphatase (predicted)	FALSE
SPAC22A12.15c	33	0.342	Bip1	ER heat shock protein BiP	FALSE
SPCPB16A4.03c	11	0.28	Ade10	bifunctional IMP cyclohydrolase/phosphoribosylaminoimidazolecarboxamideformyltransferase	FALSE
SPBC32F12.11	480	0.634	Tdh1	glyceraldehyde-3-phosphate dehydrogenase Tdh1	FALSE
SPCC1682.02c	10	0.0944	Mcm3	MCM complex subunit Mcm3	FALSE
SPBC428.02c	9	0.148	Eca39	branched chain amino acid aminotransferase Eca39	FALSE
SPAC144.11	16	0.408	Rps1102	40S ribosomal protein S11 (predicted)	FALSE
SPAC1002.19	8	0.18	Urg1	GTP cyclohydrolase II Urg1 (predicted)	FALSE
SPAC110.04c	8	0.111	Pss1	heat shock protein Pss1	FALSE
SPBC1709.05	86	0.463	Sks2	heat shock protein, ribosome associated molecular chaperone Sks2	FALSE
SPAC664.11	80	0.447	Ssc1	mitochondrial heat shock protein Hsp70	FALSE
SPBC19F5.04	7	0.171	Spbc19F5.04	aspartate kinase (predicted)	FALSE
SPBC18H10.02	17	0.169	Lcf1	long-chain-fatty-acid-CoA ligase Lcf1	FALSE
SPAC589.10c	10	0.407	Ubi5	ribosomal-ubiquitin fusion protein Ubi5 (predicted)	FALSE
SPAC1834.03c	5	0.34	Hhf1	histone H4 h4.1	FALSE
SPAC19G12.05	4	0.0756	Spac19G12.05	mitochondrial citrate transmembrane transporter (predicted)	FALSE
SPBC1685.09	4	0.321	Rps29	40S ribosomal protein S29 (predicted)	FALSE
SPBC23E6.09	4	0.0408	Ssn6	transcriptional corepressor Ssn6	FALSE
SPAC664.05	62	0.486	Rpl13	60S ribosomal protein L13 (predicted)	FALSE
SPBC14C8.04	7	0.239	Ilv6	acetolactate synthase regulatory unit Ilv6 (predicted)	FALSE
SPAC19B12.04	13	0.197	Rps3001	40S ribosomal protein S30 (predicted)	FALSE
SPAC22H12.04c	27	0.472	Rps102	40S ribosomal protein S3a (predicted)	FALSE
SPAC6F12.10c	12	0.0967	Ade3	phosphoribosylformylglycinamidine synthase Ade3 (predicted)	FALSE
SPAC23G3.10c	3	0.101	Ssr3	SWI/SNF and RSC complex subunit Ssr3	FALSE
SPBC4F6.06	3	0.0269	Kin1	microtubule affinity-regulating kinase Kin1	FALSE
SPAC57A7.04c	17	0.219	Pabp	mRNA export shuttling protein	FALSE
SPCC777.09c	12	0.345	Arg1	acetylornithine aminotransferase	FALSE
SPAC513.01c	41	0.299	Eft201	translation elongation factor 2 (EF-2) Eft2,A	FALSE
SPBC16D10.11c	25	0.401	Rps1801	40S ribosomal protein S18 (predicted)	FALSE
SPBC25H2.05	18	0.636	Egd2	nascent polypeptide-associated complex alpha subunit Egd2	FALSE
SPAC1F5.06	2	0.0377	Lsh1	ER heat shock protein Lsh1 (predicted)	FALSE
SPAC2F7.16c	2	0.0205	Pld1	phospholipase D, Pld1	FALSE
SPAC30D11.10	2	0.0746	Rad52	DNA recombination protein, Rad51 mediator Rad52 (previously Rad22)	FALSE
SPBC1711.04	2	0.109	Mtd1	methylenetetrahydrofolate reductase Mtd1 (predicted)	FALSE
SPBC2D10.04	2	0.0517	Spbc2D10.04	arrestin Aly1 related, implicated in endocytosis	FALSE
SPBC4B4.01c	2	0.0868	Ptk1	fumble family pantothenate kinase (predicted)	FALSE
SPAC13G6.02c	17	0.452	Rps101	40S ribosomal protein S3a	FALSE
SPCC74.05	9	0.522	Rpl2702	60S ribosomal protein L27 (predicted)	FALSE
SPAC12G12.04	36	0.412	Mcp60	mitochondrial heat shock protein Hsp60/Mcp60	FALSE
SPAC10F6.16	6	0.281	Mug134	mRNA stability protein Igo1 (predicted)	FALSE
SPAC1805.05	3	0.121	Cki3	serine/threonine protein kinase Cki3	FALSE
SPBC21C3.13	27	0.375	Rps1901	40S ribosomal protein S19 (predicted)	FALSE
SPAC1002.09c	13	0.227	Dld1	dihydrolipoamide dehydrogenase Dld1	FALSE
SPBC12C2.11	5	0.114	Spbc12C2.11	glutamine-fructose-6-phosphate transaminase (predicted)	FALSE
SPAC821.11	12	0.182	Pro1	gamma-glutamyl phosphate reductase Pro1 (predicted)	FALSE
SPAC22F8.05	6	0.0988	Spac22F8.05	alpha,alpha-trehalose-phosphate synthase (predicted)	FALSE
SPAC8E11.02c	8	0.285	Rad24	14-3-3 protein Rad24	FALSE
SPCC1739.13	131	0.55	Ssa2	heat shock protein Ssa2	FALSE
SPAC821.03c	9	0.297	Slf1	cell cortex node protein Slf1	FALSE
SPAC1F3.09	4	0.066	Mug161	CwfJ family protein, splicing factor (predicted)	FALSE
SPBC3E7.10	4	0.132	Fma1	methionine aminopeptidase Fma1 (predicted)	FALSE
SPAC24H6.04	3	0.116	Hxk1	hexokinase 1	FALSE
SPBC1604.07	3	0.234	Atp4	F0-ATPase subunit (predicted)	FALSE
SPAC1782.05	2	0.119	Ypa2	protein phosphatase type 2A regulator, PTPA family Ypa2	FALSE
SPAC6F6.15	2	0.199	Ypt5	GTPase Ypt5	FALSE
SPCC4G3.11	2	0.0728	Mug154	conserved fungal protein	FALSE
SPAC328.03	8	0.173	Tps1	alpha,alpha-trehalose-phosphate synthase [UDP-forming]	FALSE
SPAC24B11.11c	6	0.143	Sid2	NDR kinase Sid2	FALSE
SPCC1223.08c	5	0.182	Dfr1	dihydrofolate reductase/ serine hydrolase family fusion protein Dfr1	FALSE
SPCC1223.14	5	0.187	Spcc1223.14	chorismate synthase (predicted)	FALSE
SPAC4D7.08c	14	0.233	Ade4	amidophosphoribosyltransferase Ade4	FALSE
SPAC16E8.15	4	0.138	Tif45	translation initiation factor eIF4E, 4F complex subunit	FALSE
SPAC4A8.14	3	0.088	Spac4A8.14	ribose-phosphate pyrophosphokinase (predicted)	FALSE
SPCC1223.06	3	0.0488	Tea1	cell end marker Tea1	FALSE
SPCC11E10.01	16	0.369	Spcc11E10.01	cystathionine beta-lyase (predicted)	FALSE
SPCC23B6.01c	5	0.109	Spcc23B6.01C	oxysterol binding protein (predicted)	FALSE
SPAC29A4.15	17	0.347	Srs1	cytoplasmic serine-tRNA ligase Srs1 (predicted)	FALSE
SPAC3H5.07	7	0.268	Rpl702	60S ribosomal protein L7	FALSE
SPCC1322.13	2	0.0525	Ade6	phosphoribosylaminoimidazole carboxylase Ade6	FALSE
SPBC17D11.08	6	0.209	Spbc17D11.08	WD repeat protein, DDB1 and CUL4-associated factor 7 (predicted)	FALSE
SPAC1F7.13c	39	0.375	Rpl801	60S ribosomal protein L8 (predicted)	FALSE
SPBC215.05	6	0.239	Gpd1	glycerol-3-phosphate dehydrogenase Gpd1	FALSE
SPAC17H9.04c	6	0.0977	Nrp1	RNA-binding protein	FALSE
SPAC23C11.09	2	0.0271	Ala1	mitochondrial and cytoplasmic alanine-tRNA ligase Ala1 (predicted)	FALSE
SPAC513.05	2	0.026	Ams1	alpha-mannosidase Ams1 (predicted)	FALSE
SPBC1709.08	2	0.025	Cft1	cleavage factor one Cft1 (predicted)	FALSE
SPBC244.01c	2	0.0682	Sid4	SIN component scaffold protein Sid4	FALSE
SPAC823.03	7	0.131	Ppk15	serine/threonine protein kinase Ppk15 (predicted)	FALSE
SPAC23C4.05c	2	0.0278	Spac23C4.05C	LEA domain protein	FALSE
SPCC1183.11	2	0.0445	Msy1	MS calcium ion channel protein Msy1	FALSE
SPBC31A8.01c	7	0.133	Rtn1	reticulon-like protein Rtn1	FALSE
SPCC5E4.07	10	0.554	Rpl2802	60S ribosomal protein L27/L28	FALSE
SPBC428.11	10	0.242	Met17	homocysteine synthase Met17	FALSE
SPBC2F12.04	7	0.364	Rpl1701	60S ribosomal protein L17	FALSE
SPAC24C9.12c	45	0.392	Shm1	serine hydroxymethyltransferase Shm1 (predicted)	FALSE
SPCPB16A4.05c	15	0.29	Spcpb16A4.05C	urease accessory protein UREG (predicted)	FALSE
SPBC21C3.08c	3	0.105	Car2	ornithine transaminase Car2	FALSE
SPBC17G9.03c	5	0.125	Krs1	cytoplasmic lysine-tRNA ligase Krs1 (predicted)	FALSE
SPAC1F12.07	2	0.072	Ser1	phosphoserine aminotransferase (predicted)	FALSE
SPCC1322.14c	2	0.0458	Vtc4	vacuolar transporter chaperone (VTC) complex subunit (predicted)	FALSE
SPAC3H5.08c	3	0.0493	Spac3H5.08C	WD repeat protein, human WDR44 family	FALSE
SPAC13G7.06	4	0.154	Met16	phosphoadenosine phosphosulfate reductase	FALSE
SPAP7G5.04c	4	0.0352	Lys1	aminoadipate-semialdehyde dehydrogenase	FALSE
SPAC16C9.04c	2	0.0613	Mot2	CCR4-Not complex ubiquitin-protein ligase E3 subunit Mot2 (predicted)	FALSE
SPAC1834.07	2	0.0578	Klp3	kinesin-like protein Klp3	FALSE
SPAP7G5.02c	2	0.0631	Gua2	GMP synthase [glutamine-hydrolyzing] Gua2 (predicted)	FALSE
SPAC17G8.06c	6	0.149	Spac17G8.06C	dihydroxy-acid dehydratase (predicted)	FALSE
SPBP4H10.15	8	0.135	Aco2	aconitate hydratase/mitochondrial ribosomal protein subunit L21, fusion protein	FALSE
SPBP8B7.29	4	0.0627	Abz1	para-aminobenzoate synthase (predicted)	FALSE
SPAC4G9.16c	11	0.426	Rpl901	60S ribosomal protein L9	FALSE
SPAC23D3.04c	5	0.177	Gpd2	glycerol-3-phosphate dehydrogenase Gpd2	FALSE
SPBP35G2.09	2	0.165	Usp103	U1 snRNP-associated protein Usp103	FALSE
SPAC22E12.04	3	0.175	Ccs1	superoxide dismutase copper chaperone Ccs1	FALSE
SPAC8C9.03	3	0.146	Cgs1	cAMP-dependent protein kinase regulatory subunit Cgs1	FALSE
SPBC649.02	6	0.413	Rps1902	40S ribosomal protein S19 (predicted)	FALSE
SPAC16E8.01	5	0.0444	Shd1	cytoskeletal protein binding protein Sla1 family, Shd1 (predicted)	FALSE
SPCC1672.02c	8	0.224	Sap1	switch-activating protein Sap1	FALSE
SPBC56F2.12	19	0.374	Ilv5	acetohydroxyacid reductoisomerase (predicted)	FALSE
SPCC70.05c	2	0.0371	Nnk1	serine/threonine protein kinase Nnk1 (predicted)	FALSE
SPCC1322.08	5	0.114	Srk1	MAPK-activated protein kinase Srk1	FALSE
SPAC18G6.04c	3	0.0635	Shm2	serine hydroxymethyltransferase Shm2 (predicted)	FALSE
SPAC57A7.12	29	0.329	Ssz1	heat shock protein Ssz1 (predicted)	FALSE
SPAC2F3.09	24	0.367	Hem1	5-aminolevulinate synthase Hem1	FALSE
SPAC13G6.06c	3	0.0369	Gcv2	glycine cleavage complex subunit P (predicted)	FALSE
SPCC16C4.09	3	0.0572	Sts5	RNB-like protein	FALSE
SPCP1E11.04c	3	0.118	Pal1	membrane associated protein Pal1	FALSE
SPBC646.13	12	0.255	Sds23	PP2A-type phosphatase inhibitor Sds23/Moc1	FALSE
SPCC1322.04	6	0.209	Fyu1	UTP-glucose-1-phosphate uridylyltransferase Fyu1	FALSE
SPAC17C9.03	12	0.115	Tif471	translation initiation factor eIF4G	FALSE
SPACUNK4.16c	5	0.054	Spacunk4.16C	alpha,alpha-trehalose-phosphate synthase (predicted)	FALSE
SPAC23A1.17	5	0.0509	Bbc1	WIP family cytoskeletal protein Bbc1 (predicted)	FALSE
SPCC16C4.07	4	0.112	Scw1	RNA-binding protein Scw1	FALSE
SPCC1672.03c	2	0.0664	Gud1	guanine deaminase Gud1 (predicted)	FALSE
SPAC26H5.10c	6	0.306	Tif51	translation elongation factor eIF5A (predicted)	FALSE
SPAC1F8.07c	54	0.408	Spac1F8.07C	pyruvate decarboxylase (predicted)	FALSE
SPBC354.12	9	0.493	Gpd3	glyceraldehyde 3-phosphate dehydrogenase Gpd3	FALSE
SPCC736.15	4	0.151	Pil1	eisosome BAR domain protein Pil1	FALSE
Contaminant proteins (e.g. keratins) were removed and nonspecific proteins that were also identified in GFP trap purification from a strain lacking the GFP tag were shaded in gray. The spectral counts and sequence coverage of each protein are indicated. Proteins of interest are shaded in yellow and orange.
