# Supplementary material for: The Greatwall-Endosulfine-PP2A/B55 pathway controls entry into quiescence by promoting translation of Elongator-tuneable transcripts
Source: Research Square preprint supplement (doi:10.21203/rs.3.rs-3616701/v1), 2023-12-05
Supplement: Supplementary file 6 [file 9d5d026a21b1fc81ea9371ec.docx]

**Supplementary Table 6.- Fission yeast strains**

| *h- 972* | Lab stock | 2666 |
| --- | --- | --- |
| *h- igo1::NatMX6* | Lab stock | 2344 |
| *h? taz1:YFP:KanMX6 sad1:CFP:KanMX6 cut11:mCherry:HygMX6* | This work | JED46 |
| *h? taz1:YFP:KanMX6 sad1-CFP:KanMX6 cut11:mCherry:HygMX6 igo1::PhleoMX6* | This work | JED45 |
| *h- rap1:Linker:HA:KanMX6* | This work | JED78 |
| *h- rap1:Linker:HA:KanMX6 igo1Δ::NatMX6* | This work | JED81 |
| *h- ccq1:Linker:HA:KanMX6* | This work | JED82 |
| *h- ccq1:Linker:HA:KanMX6 igo1Δ::NatMX6* | This work | JED83 |
| *h? rap1:Linker-HA:KanMX6 igo1Δ::NatMX6 Pnmt41x:GST:pab1:KanMX6* | This work | JED89 |
| *h? taz1:YFP:KanMX6 sad1:CFP:KanMX6 cut11:mCherry:HygMX6 igo1::PhleoMX6 Pnmt41x:GST:pab1:KanMX6* | This work | JED54 |
| *h- sgo2:Linker:HA:KanMX6* | This work | JED126 |
| *h- igo1Δ:NatMX6 sgo2:Linker:HA:KanMX6* | This work | JED128 |
| *h? igo1Δ:NatMX6 Pnmt41x:GST:pab1:KanMX6 sgo2:Linker:HA:KanMX6* | This work | JED148 |
| *h- sgo2:Linker:GFP:KanMX6* | This work | JED142 |
| *h- igo1Δ::NatMX6 sgo2:Linker:GFP:KanMX6* | This work | JED187 |
| *h- clr2:Linker:HA:KanMX6* | This work | JED174 |
| *h- igo1Δ::NatMX6 clr2:Linker:HA:KanMX6* | This work | JED176 |
| *h- clr3:Linker:HA:KanMX6* | This work | JED130 |
| *h- igo1Δ::NatMX6 clr3:Linker:HA:KanMX6* | This work | JED133 |
| *h- paa1:Linker:YFP:KanMX6* | This work | JED62 |
| *h? paa1:Linker:YFP:KanMX6 trm112:Linker:HA:NatMX6* | This work | JED145 |
| *h- trm112:Linker:HA:KanR* | This work | JED119 |
| *h- igo1::NatMX6 trm112:Linker:HA:KanMX6* | This work | JED122 |
| *h? igo1::NatMX6 Pnmt41x:GST:pab1:KanMX6 trm112:Linker:HA: KanMX6* | This work | JED147 |
| *h- ctu1:Linker:HA:KanMX6* | This work | JED164 |
| *h- igo1::NatMX6 ctu1:Linker:HA:KanMX6* | This work | JED170 |
| *h+ elp3/sin3::NatMX6* | E. Hidalgo´s Lab | IV16 |
| *h? rap1:Linker:HA:KanMX6 ura4-D18* | This work | JED109 |
| *h? igo1::NatMX6 rap1:Linker:HA:KanMX6 ura4-D18* | This work | JED111 |
| *h+ igo1::natMX6 ura4-D18* | This work | JED192 |
| *h- gad8:Linker:HA:KanMX6* | This work | JED182 |
| *h- igo1::NatMX6 gad8:Linker:HA:KanMX6* | This work | JED184 |
| *h? gad8::HphMX6 sgo2:Linker:HA:KanMX6* | This work | JED191 |
| *h? elp3/sin3::natMX6 sgo2-Linker-HA:KanMX6* | This work | JED188 |
| *h? gsk3::ura4+ ura4-D18* | This work | JED202 |
| *h? igo1::NatMX6 gsk3Δ::ura4+ (clon1) ura4-D18* | This work | JED209 |
| *h? igo1::NatMX6 gsk3Δ::ura4+ (clon2) ura4-D18* | This work | JED210 |
| *h? igo1::NatMX6 gsk3Δ::ura4+ (clon3) ura4-D18* | This work | JED212 |
| *h+ ppk18::KanMX6 cek1::ura4+ ura4-D18* | Lab stock | 2361 |
| *h+ Pnmt41x:GST:pab1:KanMX6* | Lab stock | 2431 |
| *h- pab1:Linker:YFP:KanMX6* | This work | JED56 |
| *h- pgk1:HA:KanMX6* | This work | JED160 |
| *h- igo1::NatMX6 pgk1:HA:KanMX6* | This work | JED163 |
| *h- krs1:Linker:HA:KanMX6* | This work | JED134 |
| *h- igo1::NatMX6 krs1:Linker:HA:KanMX6* | This work | JED137 |
| *h- swi6:Linker:HA:KanMX6* | This work | JED156 |
| *h- igo1::NatMX6 swi6:Linker:HA:KanMX6* | This work | JED152 |
| *h- gad8::HphMX6* | Lab stock | 2888 |
| *h- igo1::KanMX6* | Lab stock | 2727 |
| *h- cek1::NatMX6 ppk18::KanMX6* | Lab stock | 2883 |
| *h- kanMX6:P41nmt1:GFP:pab1* | Lab stock | 2895 |
