# Supplementary material for: The Greatwall-Endosulfine-PP2A/B55 pathway controls entry into quiescence by promoting translation of Elongator-tuneable transcripts
Source: Research Square preprint supplement (doi:10.21203/rs.3.rs-3616701/v1), 2023-12-05
Supplement: Supplementary file 7 [file c615a1885afc1fd3ba294b73.docx]

**Supplementary Table 7.- Oligonucleotides and plasmids**

| **Oligonucleotides** | | |
| --- | --- | --- |
| CCTATTGTGAACTTCATAAAATACCTTACATAGAGGCAACTCCGCCACTTTTACGGGAAGAGCTTGTTAATTATCAATCTCGGATCCCCGGGTTAATTAA | Biomers | JED05 (*taz1*) |
| TAACAAAACTATCCGAGTCTTGTCAATATTATTCATTAAAAAAGCAATCATGAACAAACTCTATCCGGAGACGAAAAATTAGAATTCGAGCTCGTTTAAAC | Biomers | JED06 (*taz1*) |
| CAATTCCTTGAAGCTATGGAATCTACGGGTGGAAGAGTACGAATTGCCATTGCTAAACTACTTTCAAAACAAACTTCTGCAGCAGGGGCAGCAGGGGCAGCAGGGGCAGCAGGGGCAGCACGGATCCCCGGGTTAATTAA | Biomers | JED23 (*rap1*) |
| GCATAAAAAGATTCGTAATATTGTACAAGTTTAGGTCTCTTTAGAGAAATAGAATTTGGGCAGAGATGCTCGGCAATTTAGAATTCGAGCTCGTTTAAAC | Biomers | JED24 (*rap1*) |
| ACCTTAAAAATTTTAGAGCAGAAGTCTCTTCCCAAATTTACTCCACATAATCAATCACCAAGGATTATTGATTCTAACGCAGCAGGGGCAGCAGGGGCAGCAGGGGCAGCAGGGGCAGCACGGATCCCCGGGTTAATTAA | Biomers | JED25 (*ccq1*) |
| ATAATTTAATCAAATAACCGTATGACTAAACGAACTTTTTATAGTTGATTCCACTGAAGTTCTTGATCGTTAATGATTTAGAATTCGAGCTCGTTTAAAC | Biomers | JED26 (*ccq1*) |
| ACAGAAACCGCAAACATTACTTCTGAAGCACCCACTACTTCAGAAGTAACCCTTGAAAACTCCGAAACCCTTAATTTGGCAGCAGGGGCAGCAGGGGCAGCAGGGGCAGCAGGGGCAGCACGGATCCCCGGGTTAATTAA | Biomers | JED55 (*sgo2*) |
| TTTCAAATTGACGCATACCTCCACTTAAAAAATCTGAACCAACTAAACGATGTCGAAAGGTATTTAATTACATAATATTAGAATTCGAGCTCGTTTAAAC | Biomers | JED56 (*sgo2*) |
| GGCTCTGAAAATTGGGTCGATGACGATTTTTATGAATATTTACTGTCTGAAATTGATATGGTGTCAGCAGTTGTAATGGCAGCAGGGGCAGCAGGGGCAGCAGGGGCAGCAGGGGCAGCACGGATCCCCGGGTTAATTAA | Biomers | JED63 (*clr2)* |
| TTATTTACATTATAAATAATGACCGTCACTGATCAATAAGTAGACACTTCTATATCTAATTTTATCTGCCATACTTATTAGAATTCGAGCTCGTTTAAAC | Biomers | JED64 (*clr2)*) |
| GACATGATGGAGCAACACTATCGAGCGGTTACTCAATACTTGCTGCATTTGCTTCAAAAGGCCCGACCAACTTCTCAGGCAGCAGGGGCAGCAGGGGCAGCAGGGGCAGCAGGGGCAGCACGGATCCCCGGGTTAATTAA | Biomers | JED51 (*clr3*) |
| GATAACTTAAGGAGGTTAAATGTGTGACAATTAAAAGAATAGAAAACCATGAAAAAATCATAAGTCAATAACGAATGTTAGAATTCGAGCTCGTTTAAAC | Biomers | JED52 (*clr3*) |
| TTGCTCGAACAACTTACAAAAGATAATGACCCTGATGTTCAATATTTTGCTACTCAGGCCTTAGAGCAAACAAATGACGCAGCAGGGGCAGCAGGGGCAGCAGGGGCAGCAGGGGCAGCACGGATCCCCGGGTTAATTAA | Biomers | JED11 (*paa1*) |
| ATTTTTACATAGTGAACACAAATCATAAAGGTAAAACTTTTGGCTCATTTAGACATGCAATCATATAACCCAACAATTAGAATTCGAGCTCGTTTAAAC | Biomers | JED12 (*paa1*) |
| TTACATGCCAGTTGGCATCCCTTTGAAGACTCAGTTGCCATCGCCGCTACTAATAATCTTTTTGTTTTCTCTAAGCTCGCAGCAGGGGCAGCAGGGGCAGCAGGGGCAGCAGGGGCAGCACGGATCCCCGGGTTAATTAA | Biomers | JED31 (*pab1*) |
| CGGAAGTTCAATAAAAAAGGAACTATGTTCAGTCTATCCGTAGATCATAAAAACAAACCAAACTCCACATAAGGACATTAGAATTCGAGCTCGTTTAAAC | Biomers | JED32 (*pab1*) |
| ATGGTTTGCGGGAATTGTGGACATGTGTACCCCATATTTGAAGGAATTCCTAATATGCTGCTTTCCGAATCAGAAATTGCAGCAGGGGCAGCAGGGGCAGCAGGGGCAGCAGGGGCAGCACGGATCCCCGGGTTAATTAA | Biomers | JED45 (*trm112*) |
| CCAAAAATAAAGATAAAGCAGCTTTTGCAATAGTTTTCAAACACCTAATTCTTTCAAAGTGGCACCAAGCACCTAACTTAGAATTCGAGCTCGTTTAAAC | Biomers | JED46 (*trm112*) |
| AAAGGGATTACTGGTCTCGGTTTGGGAAGTGATCGTAAAACTAAAAAACTTCAATCACAAATACCGGCATGTGCCGAGGCAGCAGGGGCAGCAGGGGCAGCAGGGGCAGCAGGGGCAGCACGGATCCCCGGGTTAATTAA | Biomers | JED59 (*ctu1*) |
| AAATATAAACAAAATAACCAACATTTCGAATTCACACCCGTTTCCCAAAATCCTTAACTTTTGAAGTAAGACAAAGTTTAGAATTCGAGCTCGTTTAAAC | Biomers | JED60 (*ctu1*) |
| AATTGGAGCTATCAACGACCAACAACCATTGATACATCCGACGACATTAATACAATAGCACCTGGAAGTGTCATTAGGGCAGCAGGGGCAGCAGGGGCAGCAGGGGCAGCAGGGGCAGCACGGATCCCCGGGTTAATTAA | Biomers | JED65 (*gad8*) |
| TAAAAGAGGCAAGAAAAGCGGCATGTATGAGTAAAAATGAGAAAACTTTCAAAATAAACAAAGAAGTGTCAAATTCATCAGAATTCGAGCTCGTTTAAAC | Biomers | JED66 (*gad8*) |
| ACGTCTCTACCGGTGGTGGTGCTTCTCTTGAACTCTTGGAGGGTAAGGCTCTTCCCGGTGTCGTTGCTCTTTCTTCCAAGCGGATCCCCGGGTTAATTAA | Biomers | JED07 (*pgk1*) |
| TTAGAGAACTCTAACAGTAATTAAATCCATTATAGAATAGAGTCAGATGAGAAAGGCATTGAGAAGGAAGTGGCATCTTAGAATTCGAGCTCGTTTAAAC | Biomers | JED08 (*pgk1*) |
| AACACTATCCGTGAAGTCTTGCTTTTTCCTCATATGAAGCCCGAAGTGCAAGCTGCAGAACCTACTGTCGTTAAAGAGGCAGCAGGGGCAGCAGGGGCAGCAGGGGCAGCAGGGGCAGCACGGATCCCCGGGTTAATTAA | Biomers | JED37 (*krs1*) |
| CATTAGGCTGATTTCAATATTTACAAAAAAAGGAAAGATTTGATCGACAAACCGAAATCCGCAAACACAAAAATATTTTAGAATTCGAGCTCGTTTAAAC | Biomers | JED38 (*krs1*) |
| AGTACTATCACCAATAAAAAATGTCCTCAGAAGATGCTTCAATTTTATGAAAGCCACTTAACGTTCCGTGAAAATGAAGCAGCAGGGGCAGCAGGGGCAGCAGGGGCAGCAGGGGCAGCACGGATCCCCGGGTTAATTAA | Biomers | JED57 (*swi6*) |
| AAGCAATAACGTCAGAAAAAAGCGAAATCTAATTTATAAACAAAAGAAAAAGAATTTTTTAAAGGAACACAAAAAAATTAGAATTCGAGCTCGTTTAAAC | Biomers | JED58 (*swi6*) |
| TTCACTGGTAAGCGCTCAAG | Biomers | JED77 (*SPAC977.15*) |
| GCCAACTGATCAGCTCCTTC | Biomers | JED78 (*SPAC977.15*) |
| TGAAGGTTCATGTTCACAATGC | Biomers | JED91 (*SPAC186.06*) |
| CAAAACATCAGCACCGTTAGG | Biomers | JED92 (*SPAC186.06*) |
| TGCAATGATCCCTTTTGTGA | Biomers | JED83 (Control) |
| GGTTGCTAAGACCCGTTATCC | Biomers | JED84 (Control) |
| GCTCATATGTCGACAATGTCATTTACATTCACCAAAAGCGATG | Biomers | JED87 (pJED1) |
| ATCCCGGGGATCCTTAAGAAGTTTGTTTTGAAAGTAGTT | Biomers | JED88 (pJED1) |
| CGGCTTAGAGCGTCCGGCTT | Biomers | tRNA-LysUUU-F |
| GAGACTCGAACTCGCAACCTTC | Biomers | tRNA-LysUUU-R |
| CCTTGCTTGTTGACTGAGGCTC | Biomers | actin1-F |
| GCAACATAAAAGGCAGGTGCAT | Biomers | actin1-R |
| AATTACAAATTGGATCCCTCTACGCTTGAGAATCCTTTGGCCTCTATATTATCTTCGATAGCTCTACGTGGTTATTCTGCAGCAGGGGCAGCAGGGGCAGCAGGGGCAGCAGGGGCAGCACGGATCCCCGGGTTAATTAA | Biomers | JED97 (Cgi121) |
| ATTCAAGCCGCATAGAAAAATAGTCAAATCAATTGTGAAACATTGACAAAAGATCAGATTTGCTAGAACATATGTTTTTAGAATTCGAGCTCGTTTAAAC | Biomers | JED98 (Cgi121) |
|  |  |  |
| **Plasmids** | | |
| *pREP42x-HA-Rap1 (AAA/AAG)* | This work | pJED1 |
| *pREP42x-HA-Rap1 (allAAG)* | IDT | pJED2 |
| *pREP42x-tRNALysUUU (SPBTRNALYS.06)* | Elena Hidalgo´s Lab | p465 |
| *pREP42x-tRNALysCUU (SPCTRNALYS.11)* | Elena Hidalgo´s Lab | p466 |
| *pREP42x-tRNAGlnUUG (SPBTRNAGLN.02)* | Elena Hidalgo´s Lab | p467 |
| *pREP42x-tRNAGluUUC (SPATRNAGLU.02)* | Elena Hidalgo´s Lab | p468 |
|  |  |  |
